# Supplementary material
Source: PubMed Central journal article supplement (PMC9744443)
Supplement: NIHMS1854254-supplement-Supplementary_Material.pdf [file NIHMS1854254-supplement-Supplementary_Material.pdf]

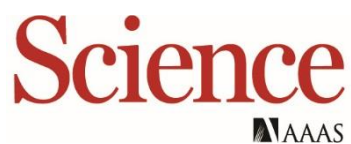

## Supplementary Materials for

### **Olfactory receptor 2 in vascular macrophages drives atherosclerosis by NLRP3-dependent IL-1 production**

Marco Orecchioni *et al.*

Corresponding author: Klaus Ley, klaus@lji.org

*Science* **375**, 214 (2022)  
DOI: 10.1126/science.abg3067

#### **The PDF file includes:**

Materials and Methods  
Figs. S1 to S17  
Tables S1 to S4  
References

#### **Other Supplementary Material for this manuscript includes the following:**

MDAR Reproducibility Checklist

## 1. Materials and Methods

### Animals

*Apoe*<sup>-/-</sup>, *Ldlr*<sup>-/-</sup>, *Nlrp3*<sup>-/-</sup>, *Adcy3*<sup>+/-</sup>, *Olfir2*<sup>GFP</sup> and *wt* mice on C57BL/6J background were purchased from Jackson Laboratories. *Rtp1/2*<sup>dHET</sup> breeding pairs were kindly provided by Dr. Hiroaki Matsunami from the Duke University Medical Center. Germ-free C57BL/6J mice were bred and maintained at the gnotobiotic facility of the University of California, San Diego. The germ-free status was confirmed weekly by standard microbiological cultures of fecal extracts, using thioglycollate broth and potato dextrose broth for facultative anaerobes including fungi, and cooked meat broth, heart infusion broth, and Columbia blood agar for obligate anaerobes. Sex-matched mice (8–10 weeks old) were used in all experiments unless specified. Mice were housed in a conventional environment and had access to chow diet *ad libitum*. From 8-10 weeks of age on, *Apoe*<sup>-/-</sup> mice were fed a western diet (WD) with 42% calories from fat (Harlan Labs Cat #: TD.88137) and remained on WD until sacrifice. *Ldlr*<sup>-/-</sup> mice (8-10 weeks of age) were used for bone marrow transplantation experiments as specified in detail below.

*Olfir2*<sup>-/-</sup> mice were generated by the UCSD transgenic mouse facility through zygote microinjection of CRISPR-Cas9 Nuclease. gRNAs (5'-ATGGAGCGAAGGAACCACAC-3') targeting the *Olfir2* gene were designed using the Crispr MIT website (<http://crispr.mit.edu/>) along with the CRISPR-Cas9 guide RNA design tool of Integrated DNA Technologies (IDT) ([https://www.idtdna.com/site/order/designtool/index/CRISPR\\_SEQUENCE](https://www.idtdna.com/site/order/designtool/index/CRISPR_SEQUENCE)), which in combination determined the most efficient and specific guide RNA. crRNAs were ordered from Integrated DNA Technologies, Inc. for testing of the Alt-R system. Tracr (cat# 1072532 Integrated DNA Technologies, Inc) and crRNA were combined according to the manufacturer's protocol. crRNA: tracrRNA duplexes were mixed with Cas9 protein (cat# 1074181 Integrated DNA Technologies, Inc) before microinjection into zygotes, which were transferred into a pseudo-pregnant recipient mouse. Analysis of Cas9 activity was performed by amplifying a region of genomic DNA around the site of interest. The primer pair 5'-TGGCCAGGATAAAGTCTG-3' and 5'-TTCTTGGCTCACCATTTCAG-3' was used to amplify a region flanking the *Olfir2* cut site. PCR amplification was performed with the CloneAmp HiFi PCR Premix (cat# 639298 Clontech Labs) according to manufacturer's instructions. PCR amplicons were then submitted for Sanger sequencing (Eton Biosciences) and subsequent chromatographs were uploaded to the Geneious prime software with their respective non-edited control chromatogram.

All animal experiments were conducted in accordance with the institutional guidelines at the La Jolla Institute for Immunology animal facility and by the University of California San Diego Institutional Animal Care and Use Committee. Sample size was determined to be adequate based on the magnitude and consistency of measurable differences between groups. Sample sizes used for atherosclerosis experiments, were based on the minimal amount of mice required to detect significance with an alpha rate set at .05 in a standardly powered experiment.

### Mouse aorta *ex vivo* culture

Each aorta was surgically removed and carefully cleaned of adipose tissue *in situ*. Aortas were either kept whole or were enzymatically digested. In brief, aortas were cut into small pieces and individually digested 1h at 37 °C in HBSS containing 450 U/ml collagenase I (cat# C0130, Sigma Aldrich), 250 U/ml collagenase XI (cat# C7667, Sigma Aldrich), 120 U/ml hyaluronidase (cat# H3506, Sigma Aldrich), and 60 U/ml DNase I (cat# LS006344, Worthington Biochemical). The digested aortic cell suspension was filtered through a 50µm cell strainer (Sysmex Partec) and washed with warm 37°C RPMI-1640 medium (cat# 72400120, Gibco-ThermoFischer) supplemented with 10% fetal bovine serum (FBS, cat# 100-106, Gemini) and 1% penicillin/streptomycin solution (cat# 15140122, Gibco-ThermoFischer) (from here on referred to as culture medium). Whole aortas or digested aortic cells were cultured in culture medium for further stimulation as described in the next paragraphs.

### Chemicals

Octanal (cat# O5608), citral (cat# C83007), and dimethylsulfoxide (DMSO cat# D2650) were purchased from Sigma-Aldrich. All chemicals used were of analytical grade or the highest grade available. Citral and octanal were diluted in PBS/DMSO respectively at a stock concentration of 10mM. Lipopolysaccharide (LPS) was purchased from Invivogen (cat# tlr1-3pelps).

OxLDL was produced in house following a previously established protocol (36). Briefly, human LDL (1 mg/ml cat# 20P-L101, Academy Bio-Medical Company, Inc.) was oxidized by incubation in 10 µmol/L CuSO<sub>4</sub>/PBS for 24h at 37°C. Oxidation was stopped by addition of EDTA (cat#15575-038, Invitrogen) at the final concentration of 1 mM.

### Olf2 functional *ex vivo* analysis experimental procedures

*Apoe*<sup>-/-</sup> mice were fed WD for 2 weeks before sacrifice for culturing aortic explants. Whole aortas were incubated in culture medium with DMSO (1:1000 as a vehicle), octanal (Oct, 10µM), LPS (500 ng/ml) alone or octanal and LPS combined (LPS+Oct) for 12h at 37°C and 5% CO<sub>2</sub>. Subsequently, aortas were collected and further processed for RNA extraction or digested as described above for flow cytometric analysis. Culture supernatants were collected, aliquoted, and frozen at -80°C until further analysis.

### Bone marrow cell isolation and generation of BMDM

Mouse bone marrow from C57BL/6j (wt), *Olf2*<sup>-/-</sup>, *Nlrp3*<sup>-/-</sup>, and *Adcy3*<sup>+/-</sup> was isolated from femora and tibiae flushed with 5 ml ice cold RPMI-1640 medium. Bone marrow cells were passed through a 70 µm cell strainer (BioPioneer) and resuspended at 1.5×10<sup>6</sup> cells/ml in culture medium supplemented with 20 ng/ml of mouse recombinant macrophage-colony stimulating factor (M-CSF; cat# 315-02, Peprotech). Cells were cultured at 37 °C and 5% CO<sub>2</sub> in a 3.8 cm<sup>2</sup> dish (Thermo Fischer). After 3 days, 2 ml of fresh medium were added. On day 7, floating cells were discarded and adherent cells used for further studies.

### Human monocyte-derived macrophages (hMDM)

Peripheral blood mononuclear cells (PBMCs) were isolated from EDTA-venous blood of healthy donors (25-50 years old) from the La Jolla Institute for Immunology in-house Normal Blood Donor Program (NBDP), using a Ficoll-Paque (GE Healthcare) standard separation protocol. Informed signed consent was obtained from all the donors. All experiments were carried out in accordance with the approved guidelines of the La Jolla Institute for Immunology NBDP. Human monocytes were enriched from PBMCs by the EasySep™ Human Monocyte Enrichment Kit (cat#19058, StemCell) according to the manufacturer's instructions. Enriched monocytes were resuspended at  $1 \times 10^6$  cells/ml with culture medium supplemented with 50 ng/ml rhM-CSF (cat#300-25, Peprotech) at 37 °C and 5% CO<sub>2</sub> for 7 days. Differentiated macrophages at day 7 were used for further studies.

### Quantitative Real Time PCR

BMDM and hMDM ( $0.5 \times 10^6$  cells) were incubated in culture media for 12 h at 37 °C and 5% CO<sub>2</sub> with DMSO (1:1000) as a control, octanal, (Oct, 10 μM), LPS (500 ng/ml) alone or combined (LPS+ Oct) and lysed with 500 μL Qiazol (cat# 79306, Qiagen). Similarly, whole aortas freshly harvested or incubated as previously described were transferred into 500 μL Qiazol and dissociated with the gentleMACS™ Dissociator (Miltenyi). RNA extraction was performed using a Qiazol/RNAeasy micro kit hybrid protocol (cat# 74004, Qiagen). Total RNA was quantified using a nanodrop spectrophotometer (PepLab) and 500 ng were reverse transcribed into cDNA using Omniscript reverse transcriptase (cat# 205111, Qiagen). Real time PCR reactions were performed according to the RT<sup>2</sup> SYBR green gene expression assay protocol (cat# 330501 Qiagen). RT<sup>2</sup> SYBR Green qPCR master mix and premade RT<sup>2</sup> qPCR Primer Assays (Qiagen) for mouse *Olf2* (cat# PPM34712A-200), *Rtp1* (cat# PPM33215A-200), *Rtp2* (cat# PPM28610A-200), *Ccl4* (cat# PPM02948F-200), *Tnf* (cat# PPM03113G-200), *Adcy3* (cat# PPM29857B-200), *Cnga1* (cat# PPM06961B-200), *Cnga2* (cat# PPM06967A-200), *Cnga3* (cat# PPM06966A-200), *Cnga4* (cat# PPM30463A-200), *Cngb1* (cat# PPM06962A-200), *Gnal* (cat# PPM30928B-200), *Fcgr1* (cat# PPM04014A-200) and *Gapdh* (cat# PPM02946E-200) were used. Similarly, real time PCR analysis of hMDM samples was performed following the RT<sup>2</sup> SYBR green gene expression assay protocol (Qiagen), applying RT<sup>2</sup> SYBR Green qPCR master mix and premade RT<sup>2</sup> qPCR Primer Assays for human *OR6A2* (cat# PPH60491A-200), *ADCY3* (cat# PPH02837A-200), *CNGA1* (cat# PPH06876A-200), *CNGA2* (cat# PPH21479A-200), *CNGA3* (cat# PPH06891B-200), *CNGA4* (cat# PPH20364A-200), *CNGB1* (cat# PPH06958B-200), *GNAL* (cat # PPH02810A-200), *TNF* (cat# PPH00341F-200), *IL6* (cat# PPH00560C-200), *NOS2* (cat# PPH00173F-200) and *GAPDH* (cat# PPH00150F-200). The results were calculated applying the  $2^{-\Delta\Delta CT}$  method using *Gapdh/GAPDH* as housekeeping gene.

### Flow cytometric analysis and sorting

BMDM, hMDM, mouse blood leukocytes and whole mount aortas were left untreated or incubated in culture medium with octanal (10 μM), LPS, (500 ng/ml) alone or combined (LPS+Oct) for 12

h at 37°C and 5% CO<sub>2</sub>. Freshly harvested, or incubated aortas were cut into small pieces and digested for cell suspension as described before. Aortic cell suspensions, BMDM, and hMDM were incubated for 1h with mouse or human Fc block solution (cat# 70-0161 Tonbo Biosciences; cat# 130-059-901, Miltenyi Biotec), respectively, and stained with primary antibodies detecting Olfr2 (1:500, cat# OSR00013W, Thermo Fischer) or OR6A2 (1:500, cat# SAB4503428-100UG, Sigma Aldrich) for 1h at RT. Normal rabbit IgG (1:500, cat# 12-370, Sigma Aldrich) incubated cells were used as a control. *Olfr2*<sup>-/-</sup> aorta cell suspensions were used as a specificity control for the Olfr2 antibody. All cells were washed 3 times and incubated with an Alexa Fluor 488- or Alexa Fluor 647 conjugated goat anti-rabbit IgG secondary antibody (1:500, cat# A27034, and A27040, Thermo Fischer) for 30 min at RT. After 3 washing steps with PBS, BMDM were stained in the dark for 20 min at RT with LIVE/DEAD (LD) Yellow fixable dye (cat# L34959, Invitrogen) and F4/80-BV421 (clone BM8, Biolegend). Aortic cells were stained in the dark for 20 min at RT with a mixture of anti-mouse CD45-PerCP (clone 30-F11, Biolegend), CD11b-PECy7 (clone M1/70, Biolegend), CD11c-BV605 (clone N418, Biolegend), TCRβ-BV711 (clone H57-597, Biolegend), CD4-PE-AlexaFluor610 (clone GK1.5, Invitrogen), CD19-APCCy7 (clone 6D5, Biolegend), GR1-BV786 (clone RB6-8C5 BD Biosciences), F4/80-BV421 (clone BM8, Biolegend) antibodies and LD Yellow fixable dye. For aortic cell sorting a mixture of the following antibodies were used: LD FVS700 (cat# 564997, BD Biosciences), F4/80-BV421 (clone BM8, Biolegend), TCRβ-APCCy7 (clone H57-597, Biolegend), CD19-APCCy7 (clone 6D5, Biolegend), CD31-PE (clone MEC-13.3, Biolegend), CD64-BV711 (clone X54-5/7.1, Biolegend). hMDM were stained in the dark for 20 min at RT with LD Yellow fixable dye and anti-human CD45-AF700 (clone HI30, BD Biosciences). Samples were analyzed with an LSR-II flow cytometer (BD Biosciences) and sorted using the BD FACSAria III (BD Biosciences). Data was acquired with the FACSDiva software (BD Biosciences) and analyzed with FlowJo software (Treestar Inc).

#### Immunofluorescence and whole mount aorta imaging

BMDM from *wt* or *Olfr2*<sup>-/-</sup> mice and hMDM were cultured on μ-Slide 8 well glass bottom slides (cat# 80827, ibidi) and left untreated or treated as described above, fixed with 2% paraformaldehyde (PFA, cat#15710, Electron Microscopy Sciences) for 30 min at 37 °C and incubated with 5% BSA for 30 min at RT. BMDM and hMDM were then stained with Olfr2 (1:500, cat# OSR00013W, Thermo Fischer) and OR6A2 primary antibodies (1:500, cat# SAB4503428-100UG, Sigma Aldrich), respectively, for 1h RT in Fc blocking solution. Cells were then washed 5 times for 5 minutes with cold PBS and stained with secondary anti-rabbit IgG-AF488 (1:500, cat# A27039 Thermo Fischer) for 30 min at 4°C. Nuclear counterstaining with Hoechst (1:2500, cat# 94403, Sigma) was performed for 10 min, cells were washed 5 times, and imaged with a ZEISS LSM880 confocal scanning microscope. Image acquisition settings were adjusted with unstained sample, and isotypes controls and kept throughout the experiment.

For whole mount imaging, aortae from *ApoE*<sup>-/-</sup> mice fed WD for 2 weeks, were carefully cleaned *in situ* and fixed in 2 % PFA at 4 °C for 24h, washed with PBS and transferred to 5 ml incubation buffer [2% FBS, 0.5% saponin (cat#47036, Sigma Aldrich), 0.1 % sodium azide (cat# S2002,

Sigma Aldrich)] containing Olfr2 primary antibody (1:1000) and agitated for 24 h at 37°C. Aortas were then washed 5 times with PBS and stained in 5 ml incubation buffer containing secondary anti-rabbit IgG-AF555 (1:500, cat# A27039 Thermo Fischer), anti-mouse CD68-AF647 (1:200, clone FA-11, Biolegend) and Hoechst (1:10000) for 24h at 37°C with agitation. Stained aortas were washed with PBS, opened longitudinally, mounted between glass slides, and imaged from the adventitial side with a ZEISS LSM880 confocal scanning microscope. Image acquisition settings were set with control samples (unstained samples, CD68-AF647 FMO, and secondary anti-rabbit IgG-AF555 FMO) and maintained throughout the experiment. Image and scan processing were performed with ZEN microscope software (Zeiss) and Imaris analysis software (Bitplane). For Olfr2, CD68, co-expression analysis nuclei were segmented using the Hoechst channel. Cell boundaries were defined by expanding the nuclei outwards by 3 µm without allowing overlap, and the intensities in the Hoechst, Olfr2, and CD68 channels were measured in those volumes. To account for the attenuation of signal with depth in the tissue, the intensities of Olfr2 and CD68 were normalized to that of Hoechst for each cell. Positive and negative populations for both channels were separated with manually determined thresholds, validated using controls FMO (1/1432 cells and 1/1098 cells were positive in the Olfr2 and CD68 FMO controls, respectively). For whole mount imaging, aortae from *Olfr2<sup>GFP</sup>* and wt mice were carefully cleaned *in situ* and fixed in 2 % PFA at 4 °C for 24 h, washed with PBS and transferred to 5 ml incubation buffer [2% FBS, 0.5% saponin (cat#47036, Sigma Aldrich), 0.1 % sodium azide (cat# S2002, Sigma Aldrich)] containing CD68 primary antibody (1:200 cat# ab125212, Abcam), and anti-GFP AF488 (1:100 clone FM264G, Biolegend) and agitated for 24h at 37°C. Aortas were then washed 5 times with PBS and stained in 5 ml incubation buffer containing secondary anti-rabbit IgG-AF598 (1:500, cat# A32740 Thermo Fischer), and Hoechst (1:10000) for 24 h at 37 °C with agitation. Stained aortas were washed with PBS, opened longitudinally, mounted between glass slides, and imaged from the adventitial side with a ZEISS LSM880 confocal scanning microscope. Image acquisition settings were set with control samples (wt samples, and secondary anti-rabbit IgG-AF598 control) and maintained throughout the experiment. Image and scan processing were performed with ZEN microscope software (Zeiss) and Imaris analysis software (Bitplane). Mouse aortic root sections of chimeric *wt Ldlr<sup>-/-</sup>* and *Olfr2<sup>-/-</sup> Ldlr<sup>-/-</sup>* mice prepared as described in a later section or human aorta obtained from a surgical specimen, cut into transversal blocks and sectioned (10 µm per section), were air dried for 30 min then fixed in 4% PFA for 10 min. The slides were then washed 2 times in PBS-T wash buffer, consisting of 0.1% Tween 20 (Thermo Fisher Scientific, cat# BP337-100) in phosphate buffered saline (Sigma, cat#P3813). The slides were then placed on a 3D-printed Freequenza Rack (<https://3dprint.nih.gov/discover/3dpx-012172>) using Shandon Plastic Coverplates (ThermoFisher Scientific, cat#72110017) avoiding air bubbles. Blocking buffer (10% normal goat serum, 5% bovine serum albumin and 0.5% Tween 20 in PBS) was added to each slide and incubated for 1h at room temperature. The primary antibody for Olfr2 or OR6A2 was then applied (1:500, cat# OSR00013W, Thermo Fischer, or 1:500, and cat# SAB4503428-100UG, Sigma Aldrich) and anti-mouse CD68-AF647 (1:400, clone FA-11, Biolegend), or anti-human CD68 (1: 400 clone KP1, Biolegend) and incubated overnight at 4°C.

After incubation, slides were then washed 4 times with 1 ml wash buffer. The primary antibodies were then detected by applying either anti-rabbit Alexa Fluor 555 (1:500, cat# A27040 Thermo Fisher) for mouse sections and anti-rabbit Alexa Fluor 647 (1:500, Cat # A32728 Thermo Fisher) or anti-mouse IgG1 Alexa Fluor 568 (1:500, Cat # A-11004 Thermo Fisher) for human sections, incubated for 1h at room temperature. The slides were then washed 4 times with PBS followed by counterstaining with Hoechst (Thermo Fisher Scientific, #H3570), 1:2000 in PBS for 5min and then washed 3 times with PBS, and coverslipped using ProLong Gold Antifade Mountant (Thermo Fisher Scientific, #P36930). All the slides were allowed to dry for 24h before imaging. Stained slides were imaged with a ZEISS LSM880 confocal scanning microscope. Image and scan processing were performed with ZEN microscope software (Zeiss).

### Calcium signaling

BMDMs, hMDMs and aortic cell suspensions were obtained as above described. Aortic cell suspensions (at least  $1 \times 10^6$  cells per sample) were pre-incubated with or without LPS (100ng/ml) for 1h and then washed and incubated for 20 min in Fc-block solution (10  $\mu$ g/ml, eBioscience) and further incubated with extracellular markers for vascular macrophages detection including CD45-PerCP (clone 30-F11, Biolegend), TCR $\beta$ /CD19-APCCy7 (clones H57-597, and 6D5, respectively, Biolegend. Dump Channel), F4/80-BV421 (clone BM8, Biolegend) and LD yellow fixable dye (Cat# L34967, Invitrogen) 20 min at RT in the dark. BMDMs from different genetic background and hMDM were seeded at the concentration of  $1 \times 10^6$  per sample pretreated with LPS (100ng/ml) for 1h and stained with CD45-PerCP (clone 2D1, Biolegend) and LD yellow fixable dye 20 min at RT in the dark. CNG channels were blocked by treating BMDMs with LCD (100  $\mu$ M, cat# ab120532 Abcam) for 1h before staining. BMDMs, hMDMs, and aortic cell suspensions were washed twice with PBS and loaded with 2  $\mu$ M of Fluo4 dye (cat# F14201, Thermo Fischer) for 30 min at 37 °C. Subsequently, cells were washed and resuspended in 37°C warm HBSS buffer (Gibco) containing Ca<sup>2+</sup> and Mg<sup>2+</sup> and acquired with the LSRII flow cytometer (BD Biosciences). Fluo4 signal was detected in the FITC channel. After 60 seconds, octanal (Oct, 10 $\mu$ M), citral (Cit, 100 $\mu$ M), vehicle (DMSO 1:1000), oxLDL(25, 50, 75  $\mu$ g/ml) or ionomycin (1 $\mu$ M, Cat # inh-ion, Invivogen) as positive control (**Fig. S9D**) was added and acquisition continued for additional 140 seconds. Data was acquired with FACS Diva software (BD Biosciences) and analyzed with FlowJo software (Treestar Inc). Mean fluorescence intensity of Fluo4 was integrated over 25 seconds from the start of the acquisition (tot. 8 intervals).

### cAMP production assay

For cAMP analysis, cAMP-Glo™ Assay (cat# V1501Promega) was used following the manufacturer's protocol. Briefly, BMDMs from *wt* or *Adcy3*<sup>+/-</sup> mice were seeded at  $1 \times 10^5$ /ml in 96-well plates. After overnight incubation at 37 °C and 5% CO<sub>2</sub>, the medium was replaced and cells were stimulated with 50 ng/ml LPS for 4 h. LPS pretreated cells were further incubated with octanal (Oct, 10  $\mu$ M) (LPS+Oct) or untreated (DMSO 1:1000) for further 8h. After incubation supernatant was eliminated and cells lysed using the cAMP glow lysis buffer. The lysate was used

to measure the cAMP production by a luciferase reaction detected using a Spectramax 2213 spectrophotometer (Molecular Devices).

#### ROS detection assay

Mouse BMDMs from wt and *Olfir2<sup>-/-</sup>* mice were seeded at  $1 \times 10^5$ /ml in 96-well plates. After overnight incubation at 37°C and 5% CO<sub>2</sub>, the medium was replaced and cells were stimulated or not with 50 ng/ml LPS for 4h. LPS pretreated and untreated cells were further incubated with octanal (Oct, 10 μM) for further 8h. After incubation culture medium was discarded from each well and replaced with 100μL prewarmed 37°C RPMI-1640 without phenol red implemented with 5μM MitoSox<sup>TM</sup> Red reagent (cat # M36008, Thermo Fisher), an indicator of mitochondrial superoxide, and incubated for 30 min at 37°C; or with 10 μM dihydrorhodamine (DHR) 123 (cat # D23806 Thermo Fisher), which is a fluorescent indicator of cytosolic ROS, and incubated for 50 min at 37°C. After incubation, cells were washed and analyzed at manufacturer defined excitation and emission wavelengths using a Spectramax 2213 spectrophotometer (Molecular Devices). Data are shown as percentage of relative fluorescence intensity variation versus fluorescence intensity of LPS only samples (shown as dotted line in the graph).

#### RNAseq analysis

For bulk RNA-seq, BMDMs from wt mice (n=3) were treated or untreated with LPS (50 ng/ml) or octanal (10 μM) for 6h. After incubation cells were washed with PBS and subsequently lysed in Qiazol (500 μL) for RNA purification, applying a Qiazol/RNAeasy micro kit hybrid protocol. RNA quality was measured by using 2100 TapeStation (Agilent Technologies). Samples with high-quality RNA (RNA integrity number >8.0) were used for the next steps. Double-stranded (ds)-cDNA was prepared using the SuperScript II reverse transcriptase (cat # 18064014 Thermo Fisher) according to the manufacturer's instructions. cDNA was amplified using 15 cycles and eluted in 24 μL. 100ng of resulting cDNA was processed using the Illumina DNA Prep Kit (Cat# 20018704, Illumina) following manufacturer's instructions. Samples were pooled into and loaded onto an Illumina NovaSeq 6000, and sequenced with 50 base pair paired-end reads (PR50). Transcriptomes were mapped to the Ensemble mouse genome release 39 with annotation release 103. Post-mapping quality control checks were used to exclude poor quality samples. DE genes and volcano plot were generated using the R studio packages DEseq2 and GGPLOT2. Enrichment pathway analysis was done by Metascape online software.

#### IL-1 production and LDH assay

Mouse BMDMs and human MDMs were seeded at  $5 \times 10^5$ /ml in 96-well plates. After overnight incubation at 37°C and 5% CO<sub>2</sub>, the medium was replaced and cells were stimulated with 50 ng/ml LPS for 4h. LPS pretreated and untreated cells were further incubated with octanal (Oct, 10 μM) and citral (Cit, 100 μM) alone (LPS+Oct; LPS+Cit; respectively) or combined (LPS+Oct+Cit) for further 8 h. Supernatants were collected by centrifugation at 500 x g for 5 min at 4°C, and frozen at -80°C until further analysis by cytokine bead arrays (CBA, BD Biosciences). For



pharmacologic inhibition, BMDMs or HMDMs were stimulated with LPS for 4h, the medium was removed and replaced with RPMI 1640 media containing DMSO (1:1000), or LCD (100  $\mu$ M for 1h) or MCC950 (10  $\mu$ M, 1h; cat# inh-mcc, Invivogen) or VX-765 (50  $\mu$ M, 1h; cat# inh-vx765i-1, Invivogen), or Ouabain (50  $\mu$ M, 30min; cat#PHR1690-1G, Sigma), or BAPTA-AM (10  $\mu$ M, 30min; cat# B6769, Invitrogen). Cells were then stimulated with: 5 mM adenosine 5'-triphosphate disodium salt hydrate (ATP, 5 mM; cat# tlrl-atpl, Invivogen) as positive control (not shown) or with octanal (Oct, 10  $\mu$ M) (LPS+Oct) for further 8h. Supernatants were collected by centrifugation at 500 x g for 5 min at 4 °C, collected and frozen at -80 °C until further IL-1 $\beta$  analysis by CBA (BD Biosciences). LDH release was measured using the CyQUANT™ LDH Cytotoxicity Assay (cat# C20300 Thermo Fischer) following the manufacturer's protocol. Absorbance was measured at 490 nm and 680 nm using a Spectramax 2213 spectrophotometer (Molecular Devices).

#### OR6A2 silencing in hMDM

Human MDM cells ( $2 \times 10^6$ ) were resuspended in 100  $\mu$ L RT Nucleofector® Solution A mixture (Amaxa® Cell Line Nucleofector® Kit V; cat# VVCA-1003, Lonza) containing 5 pmol non-silencing siRNA duplex (siCtrl, silencer negative control, Cat# 4390843, Thermo Fischer) or silencing siRNA targeted against the *OR6A2* gene respectively (*OR6A2* assay ID 148343, Thermo Fischer). The suspension was transferred to an aluminum electroporation cuvette (Lonza) and pulsed in a Nucleofector 2b Device (Lonza) using the preset BMDM program. After electroporation, cells were transferred to RPMI-1640 medium supplemented with 20% of FBS, 100 U/ml penicillin and 100 U/ml streptomycin, and 50 ng/ml hMCSF (Peprotech) and cultured at 37°C and 5% CO<sub>2</sub> for 48h. Cell viability was determined by a trypan blue exclusion assay. Silenced cells were then used for the IL-1 $\beta$  secretion assay as described above or treated for gene expression analysis. Briefly, *OR6A2* silenced hMDM were suspended in culture medium and treated with octanal, (Oct, 10  $\mu$ M), LPS (500 ng/ml) alone or combined (LPS+ Oct), and DMSO (1:1000) as a control for 12h at 37°C and 5% CO<sub>2</sub>. After incubation, cells were subsequently lysed in Qiazol (500  $\mu$ L) for RNA purification, applying a Qiazol/RNAeasy micro kit hybrid protocol. *OR6A2*, *TNF*, *IL6*, and *NOS2* expression levels were analyzed by qRT-PCR as described above. The results were calculated applying the  $2^{-\Delta\Delta CT}$  method *GAPDH* was used as a housekeeping gene.

#### Secreted cytokines

Supernatants of stimulated cells and aortic tissue were analyzed by BD CBA Flex Sets (BD Biosciences) for mouse TNF (cat# 558299), CCL4 (cat# 558343), IL-1 $\beta$  (cat# 560232), IL-1 $\alpha$  (cat# 560157) or human TNF (cat# 558273), IL-6 (cat# 558276), IL-1 $\beta$  (cat# 558279), and IL-1 $\alpha$  (cat# 560153) according to the manufacturer's protocol. Samples were analyzed with FACS Canto II (BD Biosciences). Data was acquired with FACSDiva software (BD Biosciences) and analyzed with FCAP array software 2.0 (BD Biosciences).

#### Octanal and citral treatment in *Apoe*<sup>-/-</sup> mice.

Male *Apoe*<sup>-/-</sup> mice (8 to 10 wks old) were fed WD for 4 weeks. Octanal or citral solution in DMSO was further diluted in sterile phosphate buffered saline (PBS) (Gibco) at 10  $\mu$ g/g body weight. 100

µl were injected intraperitoneally (i.p.) every 3 days for 4 wks (12 injections total) while maintaining WD administration. 100 µl of PBS + 1:1000 DMSO (Sigma Aldrich) was injected as a vehicle control. Mice were sacrificed, perfused with PBS supplemented with 2% heparin (cat# C504710, Fresenius Kabi USA, LLC), aortas and hearts were dissected for en face staining and roots atherosclerotic lesion assessment, respectively. Mouse whole blood was collected in EDTA tubes via cardiac puncture. Blood leukocyte counts were determined by HemaVet 950 (Drew Scientific). Plasma was collected from blood centrifuged at 3000 x g for 15 min at 4°C and stored at -80°C until further analysis.

#### Bone marrow transplantation

Ten-week-old *Ldlr*<sup>-/-</sup> sex-matched mice were irradiated twice 2-4h apart with 550 rads X-ray irradiation to induce systemic medullar aplasia. Irradiated mice were repopulated intravenously via the tail vein or retroorbital injection with bone marrow cells ( $5 \times 10^6$  cells) isolated from 8-week-old *wt*, *Rtp1/2*<sup>2ko</sup>, or *Olf1/2*<sup>-/-</sup> mice. BMTed mice per cages were randomized to avoid possible housing bias. After a 2-week recovery period, mice were fed a high cholesterol diet (HCD, D12108C, Research Diets Inc.) for additional 12 wks. For octanal in vivo injection experiments, mice after 8 wks HCD were injected intraperitoneally (i.p.) with octanal (10 µg/g body weight) or vehicle (PBS+1:1000 DMSO) every 3 days for 4 weeks (12 injections total) while maintaining HCD administration.

At the end of the 12 wks HCD mice were sacrificed, perfused with PBS supplemented with 2% heparin (Fresenius Kabi USA, LLC). Aortas and hearts were dissected for *en face* and roots atherosclerotic lesion assessment, respectively. Blood was collected in EDTA tubes by cardiac heart puncture. Blood leukocyte counts were determined by HemaVet 950 (Drew Scientific). Plasma was collected from blood centrifuged at 3000 x g for 15 min at 4 °C and stored -80 °C until further analysis.

#### Atherosclerosis quantification in whole aortas

After explant, each aorta was incubated with 4% PFA for at least 24h at 4°C and pinned out. Atherosclerotic plaques were stained by Sudan IV. Microphotographs of the luminal (endothelial) aspect of the aortic surface were analyzed using Photoshop CS (Adobe Systems).

Atherosclerotic lesion size measurement was performed by blinded investigators using Image-Pro Premier software (Media Cybernetics) or QuPath (v0.2.3). Aortas with insufficient quality (extensive tissue damage) were excluded from further analysis. Possible outliers were assessed by ROUT test with Q= 1%.

#### Atherosclerosis quantification and plaque characterization in aortic roots

The aortic roots along with the basal portion of the heart were embedded in OCT compound (cat#4585 Fischer Healthcare) and were cut in 8 µm-thick serial sections beginning from the onset of the aortic valves. Serial sections were stained with Oil-red O and analyzed with a ZEISS AxioScan Z1 microscope (Carl Zeiss Microscopy). A hematoxylin and eosin (H&E) and

picrosirius red (PSR) staining was applied to visualize necrotic core and collagen content respectively in atherosclerotic lesions and analyzed with a ZEISS AxioScan Z1 microscope (Carl Zeiss Microscopy). Polarized light micrographs were collected on Nikon Eclipse TE2000-s inverted microscope equipped with Leica DFC450 RGB camera. In addition, immunostaining was performed on the aortic root for expression of CD68 (1:400 clone FA-11, cat# MCA1957 Biorad) and  $\alpha$ SMA polyclonal antibody (1:400 cat# ab5694, Abcam) followed by a goat anti-rabbit IgG (H+L) conjugated with Alexa Fluor 647 (1:500, cat# A27040 Thermo Fisher). Hoechst (1:10000) was used to stain nuclei. Quantification of lesions size, necrotic core, collagen content and CD68/ $\alpha$ SMA<sup>+</sup> cell count was assessed by blinded scientist using the open access QuPath v0.2.3 software (<https://qupath.github.io/>) for manual and automatic lesion detection. Samples having tissue sections with insufficient quality were excluded from further analysis. Possible outliers were assessed by ROUT test with Q= 1%.

### Plasma Lipid Analysis

Performed by IDEXX BioResearch (6290-Lipid Panel Rodent).

### Human aortic tissue

The human aortic specimen was surgically removed from a 64 years old female to repair an aneurysm of the ascending aorta extending from the sinotubular junction to the left arteria subclavia. The patient was a smoker and had known hypercholesterolemia, but was not on statins prior to the repair. Informed signed consent was obtained from the donor. The study was reviewed and approved by the Ethics Committee of the University of Cologne (Germany). Harvested aortic tissue was cut into longitudinal strips and fixed with Zinc formalin solution (Cat# Z2902-3.75L, Sigma-Aldrich). The specimen was then divided in blocks. Whole wall thickness sections (10  $\mu$ m thick) were cut transversally and stained for OR6A2 and CD68 as described.

### Human atherosclerotic plaques leukocyte composition

A deconvolution method (Cibersort, <https://cibersort.stanford.edu/>) was applied to enumerate the relative abundance of main leukocyte populations using the same cell signature as previously described (37), from a set of bulk mRNA expression dataset of human carotid plaques from the Biobank of Karolinska Endarterectomies (BiKE, GSE21545).

### <sup>13</sup>C<sub>18</sub>oleic acid gavage and aorta ex vivo experiment

<sup>13</sup>C<sub>18</sub>oleic acid (cat. # 490431, Sigma Aldrich) at a total dose of 3 mg was administered by single gavage in wt male mice (n=5) 8/10 weeks of age. Blood plasma, collected retro-orbitally from all animals before gavage was used as baseline. After 24h from the gavage, mice were sac and the blood harvested by cardiac puncture. Plasma was collected as described before.

For the ex vivo experiment, Aorta (n=4 per group) were harvested from 30 weeks old *ApoE*<sup>-/-</sup> mice and kept in 37°C warm completed media. Aorta were treated or untreated with 3mg/ml <sup>13</sup>C<sub>18</sub>oleic

acid for 12h. After incubation, aortae were washed with PBS and snap-frozen in liquid nitrogen for octanal detection analysis.

#### Octanal detection by mass spectrometry

For octanal analysis, 196 human blood plasma specimens from GeneBank at the Cleveland Clinic were used (<https://clinicaltrials.gov/ct2/show/NCT00590200>). Demographics and clinical characteristics are reported in Table S1. All participants from GeneBank gave written informed consent approved by the Cleveland Clinic Institutional Review Board. Mouse blood plasma was collected retro-orbitally from 8-10 weeks old *ApoE*<sup>-/-</sup>, *Ldlr*<sup>-/-</sup> and wt mice fed CD, WD, or HCD for 1 day and from germ-free mice or conventional wt mice. Plasma octanal was derivatized with 3-nitrophenylhydrazine in the presence of 1-ethyl-3-(3-dimethylaminopropyl)carbodiimide (EDC) and detected by LC/MS/MS after injection onto a Titan™ C18 UHPLC Column (1.9 μm particle size, 10 cm × 2.1 mm, Supelco) with elution solvent generated by two pumps from solvent A, water + 0.01% formic acid, and B, acetonitrile + 0.01% formic acid. A typical ion extracted LC chromatogram of octanal derivative in positive MRM mode with a parent to daughter transition, m/z 264.2→119.1, was shown. <sup>2</sup>H<sub>16</sub>octanal (d<sub>16</sub>-octanal) was spiked to plasma before derivatization reaction as internal standard and monitored in positive MRM mode with a parent to daughter transition, m/z 280.2→120.2. Serial dilutions of octanal were mixed with a fixed amount of <sup>2</sup>H<sub>16</sub>octanal followed by derivatization reaction were used to prepare a calibration curve. Plasma from mice after or before (baseline) gavage with <sup>13</sup>C<sub>18</sub>oleic acid was analyzed as described above. Structural formulae of octanal, <sup>13</sup>C<sub>8</sub>octanal and d<sub>16</sub>-octanal derivatives after reaction with 3-nitrophenylhydrazine and their respective daughter ion formation during collision-induced dissociation is reported in **Fig. S12A**. A typical ion extracted LC chromatogram of <sup>13</sup>C<sub>8</sub>octanal derivative in positive MRM mode with a parent-to-daughter transition, m/z 272.2→120.1 was detected. Aorta and feces harvested from 30 weeks old *ApoE*<sup>-/-</sup> mice and aorta from *ex vivo* <sup>13</sup>C<sub>18</sub> oleic acid treatment were snap-frozen in liquid nitrogen. Before analysis tissue was weighed, homogenized, and treated as described for plasma. To calculate the concentration of octanal in the aorta we estimated the aorta homogenate density as ~1 g/ml and used to retrieve volume and calculate the octanal aortic concentration in μM.

#### Statistics

All statistics in this study were performed using Graphpad Prism 6.0 using One-way or Two-way ANOVA followed by Tukey's test for multiple comparisons. Where appropriate, statistical significance was tested with unpaired t-Test with Welch correction. The respective statistical tests are indicated in each figure legend. Data are presented as mean  $4.12 \pm 0.03$  (SEM). P-values below 0.05 were considered significant.

## 2. Supplementary Material Figures

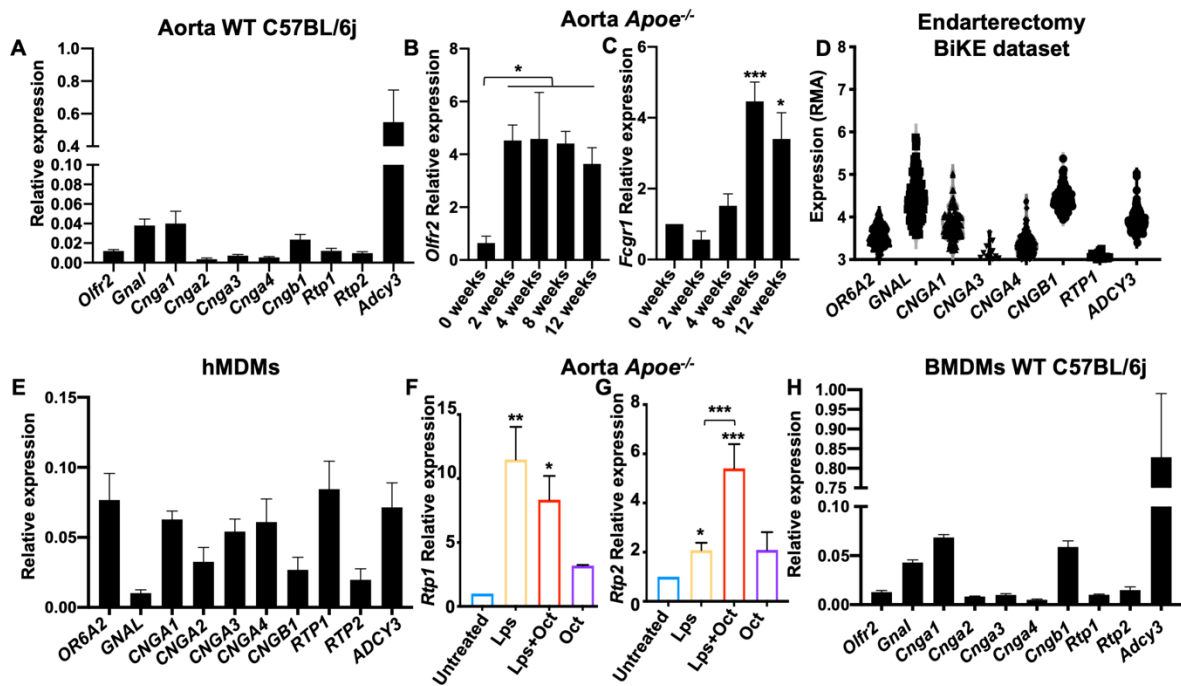

**Fig. S1. *Olfr2* has known human orthologue *OR6A2* and associated genes are expressed in mouse macrophages and human plaques.** **A)** Gene expression analysis of *Olfr2*, *Rtp1*, *Rtp2*, *Adcy3*, *Gnal*, *Cngal*, 2, 3, 4 and *Cngb1* on freshly harvested Aorta from C57BL/6j mice, Gene considered expressed with Ct < 33, all normalized to *Gapdh* expression. **B)** *Olfr2* and **C)** *Fcgr1* expression in aortas of *ApoE*<sup>-/-</sup> mice set on WD for 2, 4, 8 and 12 weeks. *ApoE*<sup>-/-</sup> mice on normal CD were used as control (0 weeks). Relative expression is calculated by the  $2^{-\Delta\Delta Ct}$  method, normalized based on *Gapdh* expression. **D)** *OR6A2*, *GNAL*, *CNGA1*, *CNGA3*, *CNGA4*, *CNGB1*, *RTP1*, and *ADCY3* expression measured by Affymetrix gene array (BIKE dataset, GSE21545) expressed as RMA (log scale). **E)** Gene expression analysis of *OR6A2*, *RTP1*, *RTP2*, *ADCY3*, *GNAL*, *CNGA1*, 2, 3, 4 and *CNGB1* on hMDMs. Gene considered expressed with Ct < 33, all normalized to *GAPDH* expression. **F** and **G)** Whole aortas were left untreated (DMSO 1:1000) or incubated with octanal (Oct, 10  $\mu$ M), LPS, (500 ng/ml), or with both for 12h. *Rtp1* and *Rtp2* expression was assessed by RT-qPCR. Relative expression is calculated by the  $2^{-\Delta\Delta Ct}$  method, normalized based on *Gapdh* expression. **H)** Gene expression analysis of *Olfr2*, *Rtp1*, *Rtp2*, *Adcy3*, *Gnal*, *Cngal*, 2, 3, 4 and *Cngb1* on BMDMs from C57BL/6j mice. Gene considered expressed with Ct < 33, all normalized to *Gapdh* expression. N= 3/5 Data are presented as mean  $\pm$  SEM. \*  $p < 0.05$ , \*\*  $p < 0.01$ , \*\*\*  $p < 0.001$ .  $p$  calculated by one-Way ANOVA followed by Tukey's multiple comparisons test for **B**, **C**, **F**, and **G**.

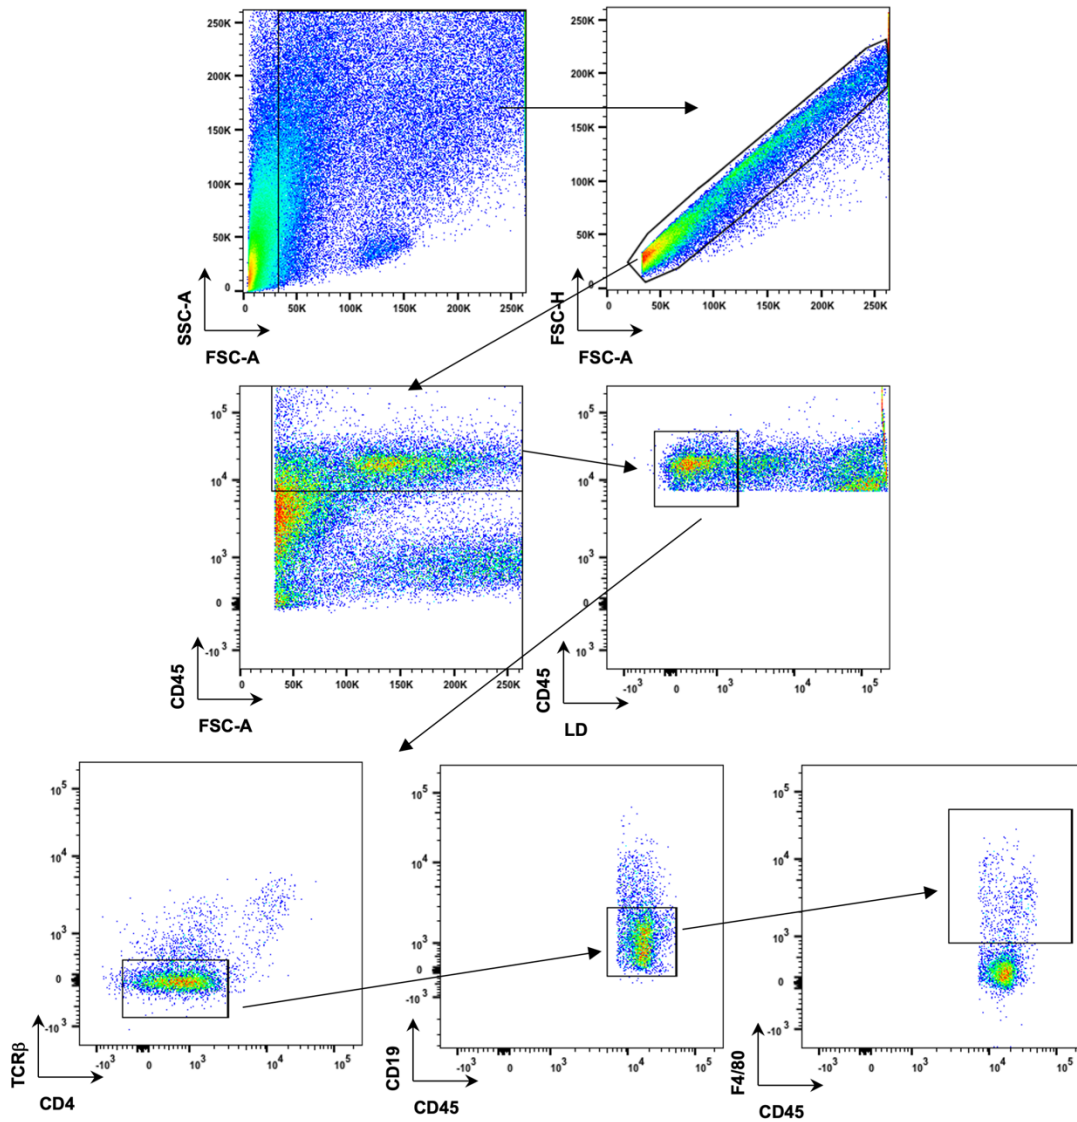

**Fig. S2. Gating strategy for aortic vascular macrophages.** Gating out debris (top left), then gate for singlets (top right), CD45<sup>+</sup> live (middle row), TCR $\beta$ <sup>-</sup>CD4<sup>+</sup>CD19<sup>-</sup> (bottom left) F4/80<sup>+</sup> (bottom right). Pseudocolor dot plots.

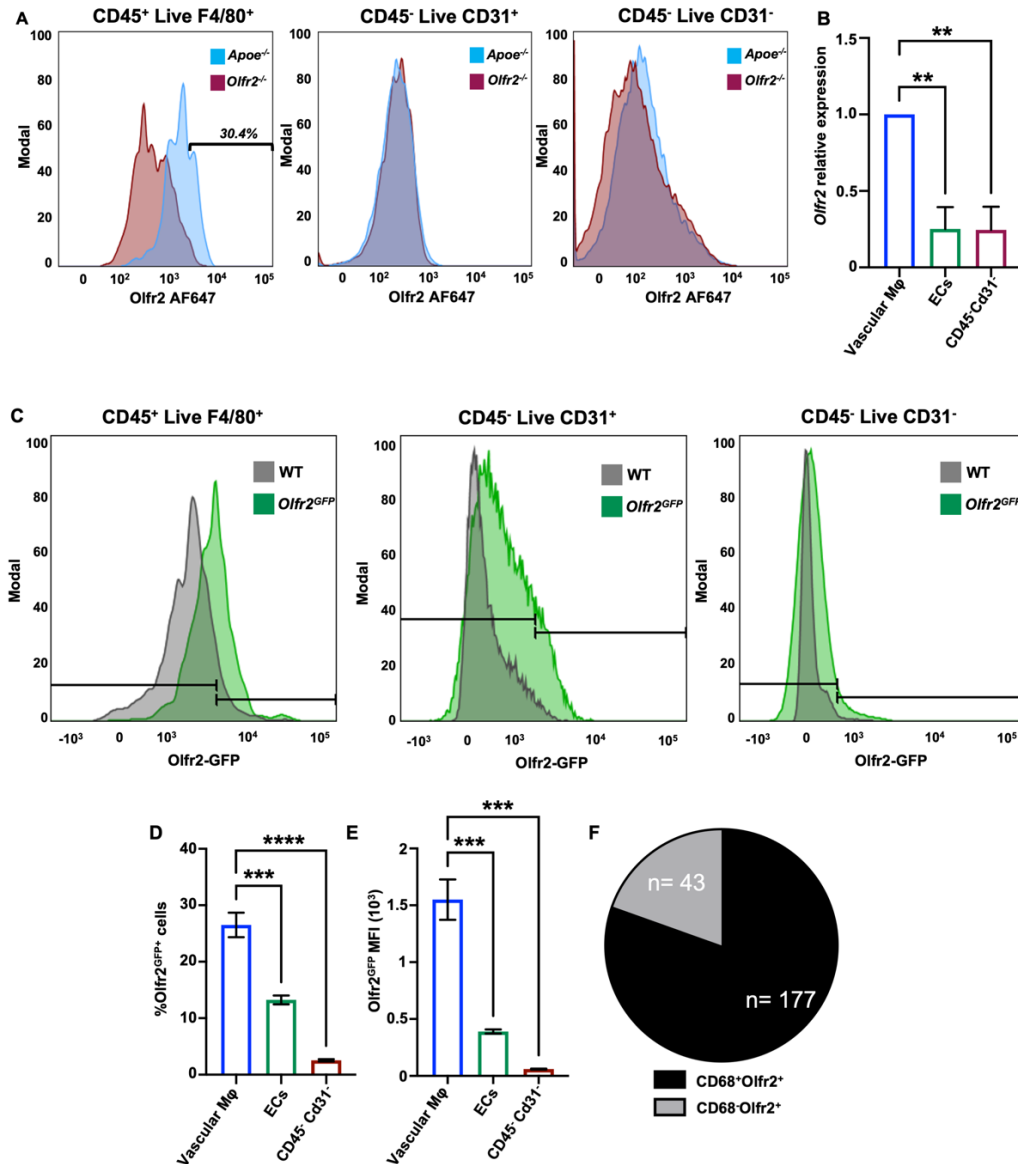

**Fig. S3. *Olf2* expression in macrophages and non-macrophages cells.** **A)** Flow cytometry on enzymatically dissociated aortas from atherosclerotic *Apoe*<sup>-/-</sup> mice kept on WD for 2 weeks and *Olf2*<sup>-/-</sup> mice reported as histogram, for vascular Mφ (CD45<sup>+</sup>, Live, TCRβ<sup>-</sup>, CD19<sup>-</sup>, F4/80<sup>+</sup>), ECs (CD45<sup>-</sup>, Live, CD31<sup>+</sup>) and other aortic cells (CD45<sup>-</sup>, Live, CD31<sup>-</sup>). Data are presented as representative of 1 out of 3 replicates. **B)** *Olf2* mRNA expression analysis on FACS sorted live vascular Mφ (CD45<sup>+</sup>, Live, TCRβ<sup>-</sup>, CD19<sup>-</sup>, F4/80<sup>+</sup>) CD45<sup>-</sup> CD31<sup>+</sup> endothelial cells (ECs), and CD45<sup>-</sup> CD31<sup>-</sup> cells including possible transdifferentiated SMCs from *Apoe*<sup>-/-</sup> aorta from mice kept on WD for 2 weeks (n=4 per group). **C-E)** Flow cytometry on enzymatically dissociated aortas from *Olf2*<sup>GFP</sup> and *wt* mice reported as **C)** histograms (presented as representative of 1 out of 3 replicates); **D)** % of *Olf2*<sup>GFP+</sup> cells or **E)** *Olf2*<sup>GFP</sup> MFI for vascular Mφ (CD45<sup>+</sup>, Live, TCRβ<sup>-</sup>, CD19<sup>-</sup>, F4/80<sup>+</sup>), ECs (CD45<sup>-</sup>, Live, CD31<sup>+</sup>) and other aortic cells (CD45<sup>-</sup>, Live, CD31<sup>-</sup>). MFI data reported have been subtracted from respective *wt* cells background. **F)** Co-expression analysis in aorta, shown as %. ± SEM. \* *p* < 0.05, \*\* *p* < 0.01. *p* calculated by: One-Way ANOVA followed by Tukey's multiple comparisons test for **B, D, E**.

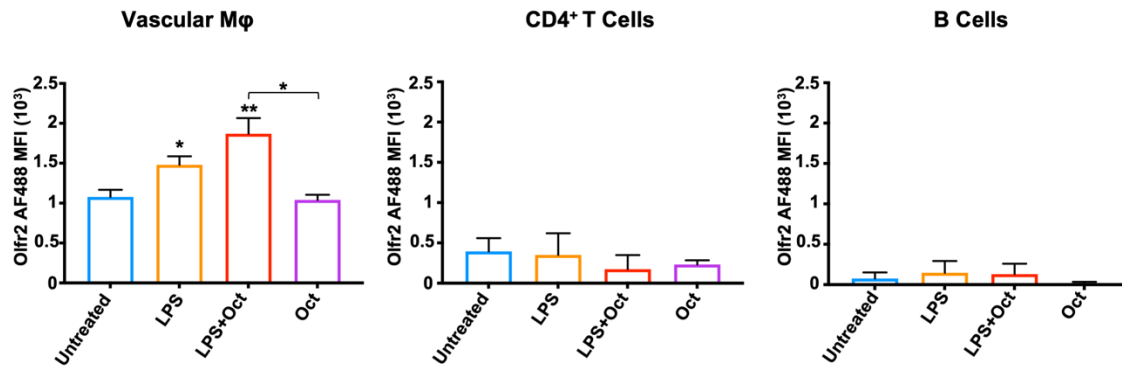

**Fig. S4. Olf2 expression in other leukocytes.** Whole aortas were left untreated (DMSO 1:1000) or incubated with octanal (Oct, 10  $\mu$ M), LPS, (500 ng/ml), or with both for 12 h. Aortas were digested and cells stained for Olf2 detection and analyzed by flow cytometry. Olf2 Median Fluorescence Intensity (MFI) of CD4<sup>+</sup> T cells (CD45<sup>+</sup>, Live, TCR $\beta$ <sup>+</sup>, CD4<sup>+</sup>) and B cells (CD45<sup>+</sup>, Live, TCR $\beta$ <sup>-</sup>, CD19<sup>+</sup>) is reported (n=3-5 per group).  $\pm$  SEM. \*  $p < 0.05$ , \*\*  $p < 0.01$ .  $p$  calculated by: One-Way ANOVA followed by Tukey's multiple comparisons test.



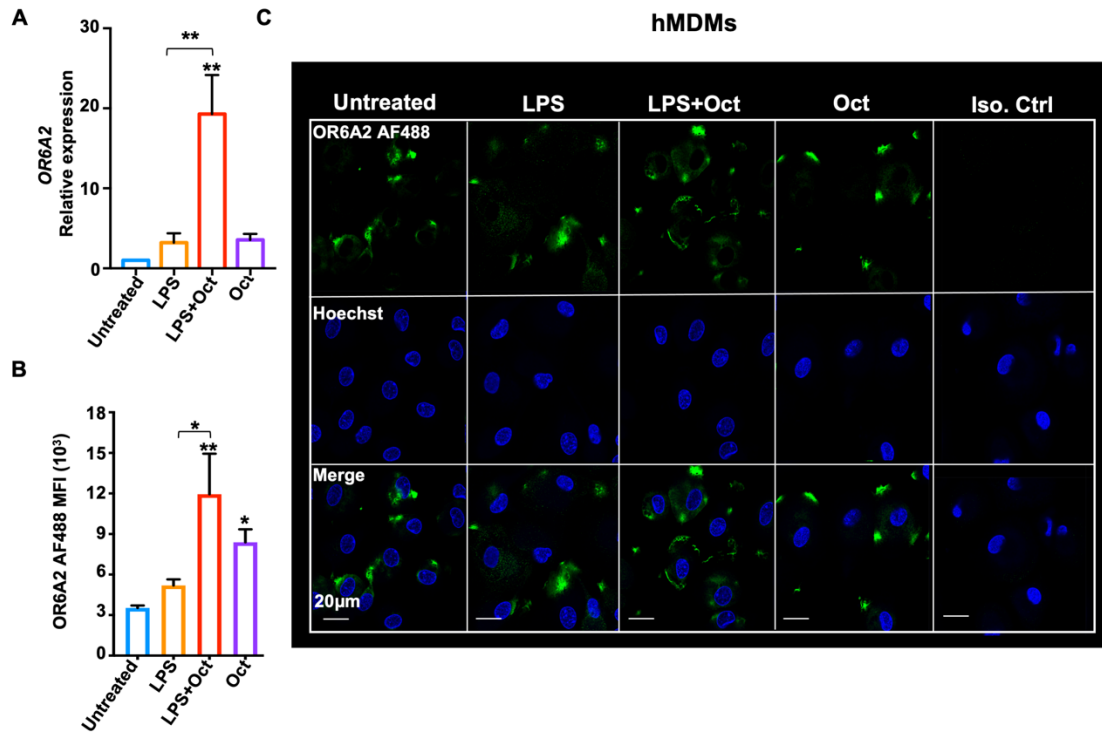

**Fig. S5. OR6A2 expression in human monocyte-derived macrophages (hMDMs).** **A)** Blood monocytes from healthy human donors were differentiated into macrophages (hMDMs) and incubated with octanal (Oct, 10  $\mu$ M), LPS (500 ng/ml), both or neither as indicated. RT qPCR analysis of *OR6A2* expression normalized to *GAPDH* and untreated control. **B)** Flow cytometric analysis of OR6A2 surface expression on live hMDMs reported as MFI $\pm$ SEM. **C)** High resolution confocal microscopy of hMDM stained for OR6A2 (AF488, green) and Hoechst (nuclei, blue). Scale bars 20  $\mu$ m. Data are presented as mean  $\pm$  SEM. \*  $p < 0.05$ , \*\*  $p < 0.01$ .  $p$  calculated by One-Way ANOVA test, Tukey's multiple comparisons test.

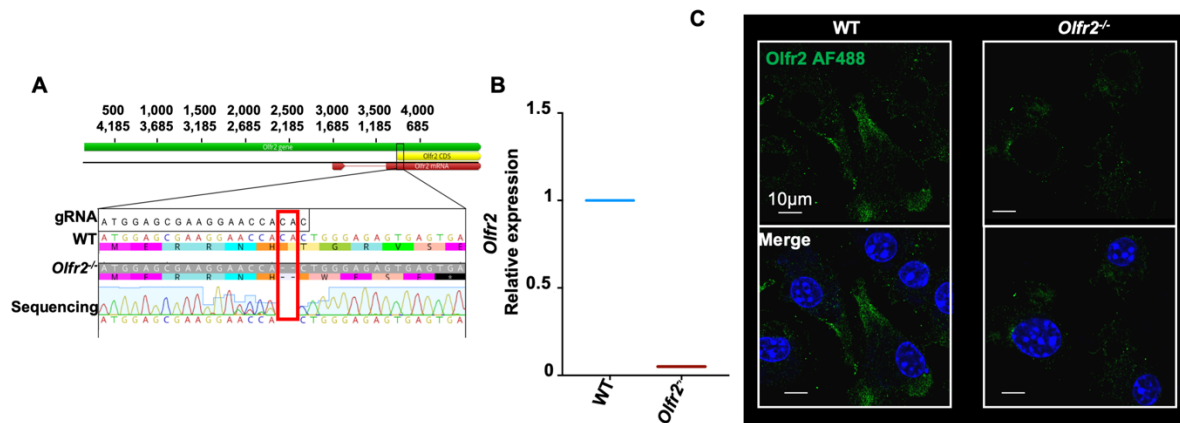

**Fig. S6 *Olfir2*<sup>-/-</sup> mouse generation.** A) Targeting *Olfir2* by Crispr/Cas 9. Guide RNA (gRNA) sequence indicated. Numbers above green bar are indicating the gene base interval. *Olfir2*<sup>-/-</sup> validation by B) RT qPCR from whole aortas, C) confocal microscopy visualizing *Olfir2* expression in wt or *Olfir2*<sup>-/-</sup> derived BMDMs (AF488, green). Scale bars 10 µm.

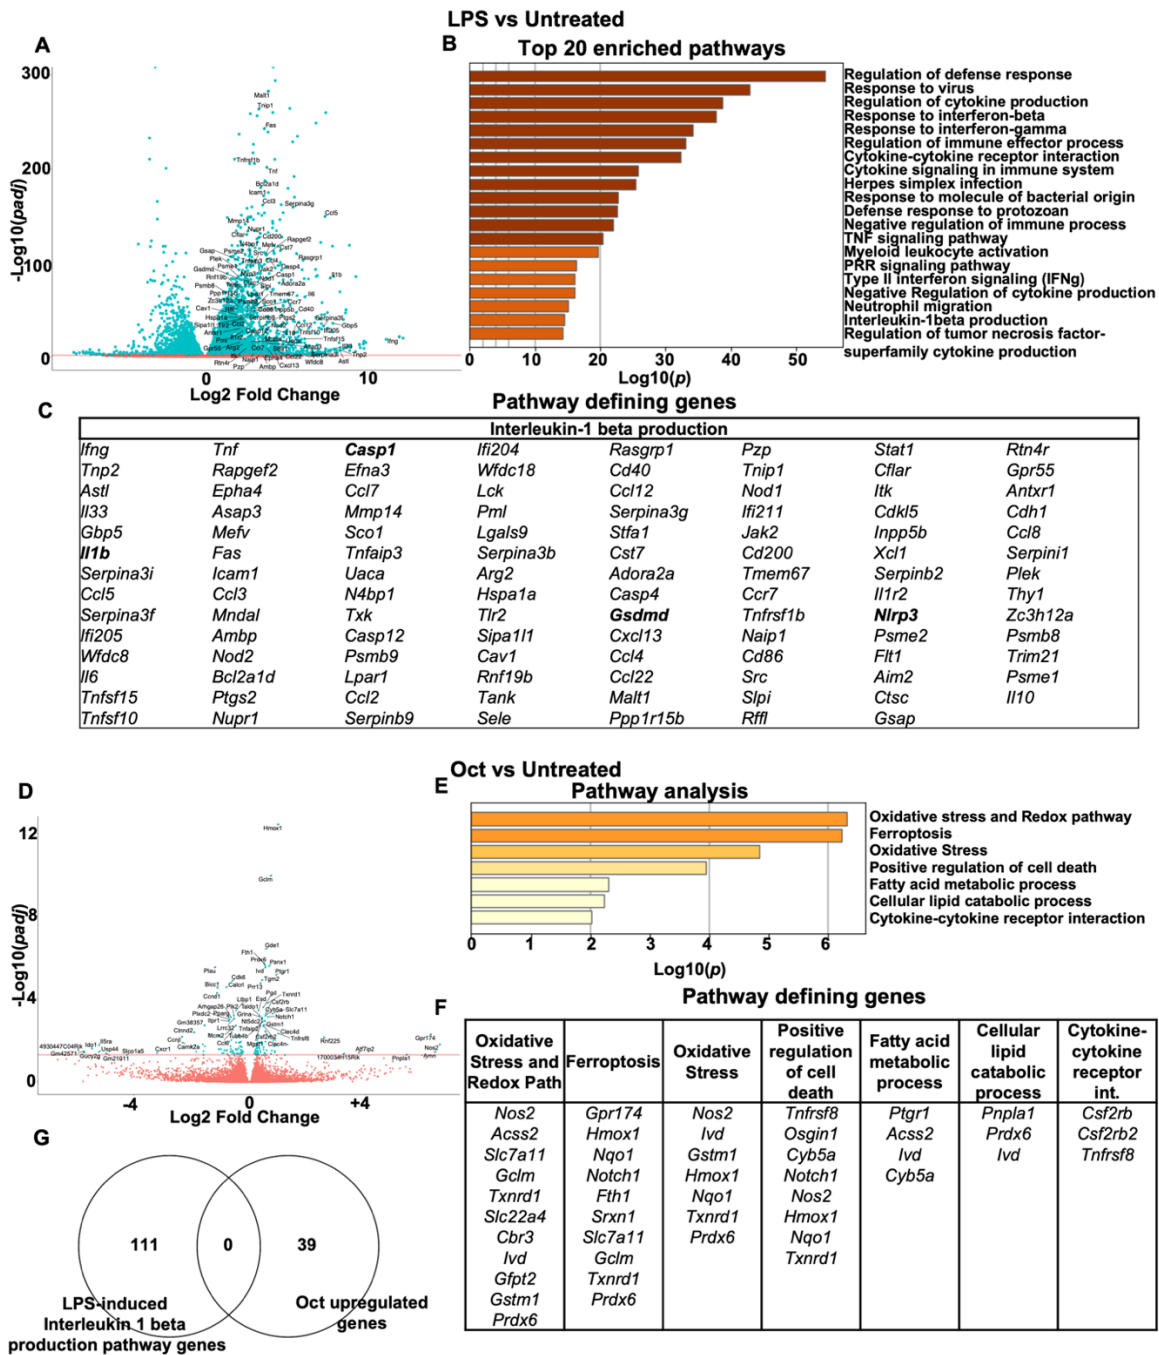

**Fig. S7. Gene expression analysis.** BMDMs were treated with LPS or octanal (Oct 10 $\mu$ M) or left untreated (DMSO 1:1000) for 6h. **A)** Volcano plot for LPS vs untreated. **B)** Top 20 enriched pathway modulated by LPS vs untreated upregulated genes ( $\log_2FC > 2$ ) generated by Metascape. **C)** Interleukin-1 beta pathway defining genes are reported. **D)** Volcano plot for Oct vs untreated. **E)** Enriched pathway by Oct vs untreated upregulated genes ( $\log_2FC > 0.5$ ) generated by Metascape. **F)** All pathway defining genes are reported ( $\log_{10} p$  value  $> 2$ ). **G)** Venn diagram of LPS induced Interleukin-1 beta production pathway genes vs Oct upregulated genes ( $\log_2FC > 0.5$ ). See **Table S3 and S4** for full DE genes (False Discovery Rate [FDR] $< 0.05$ ).

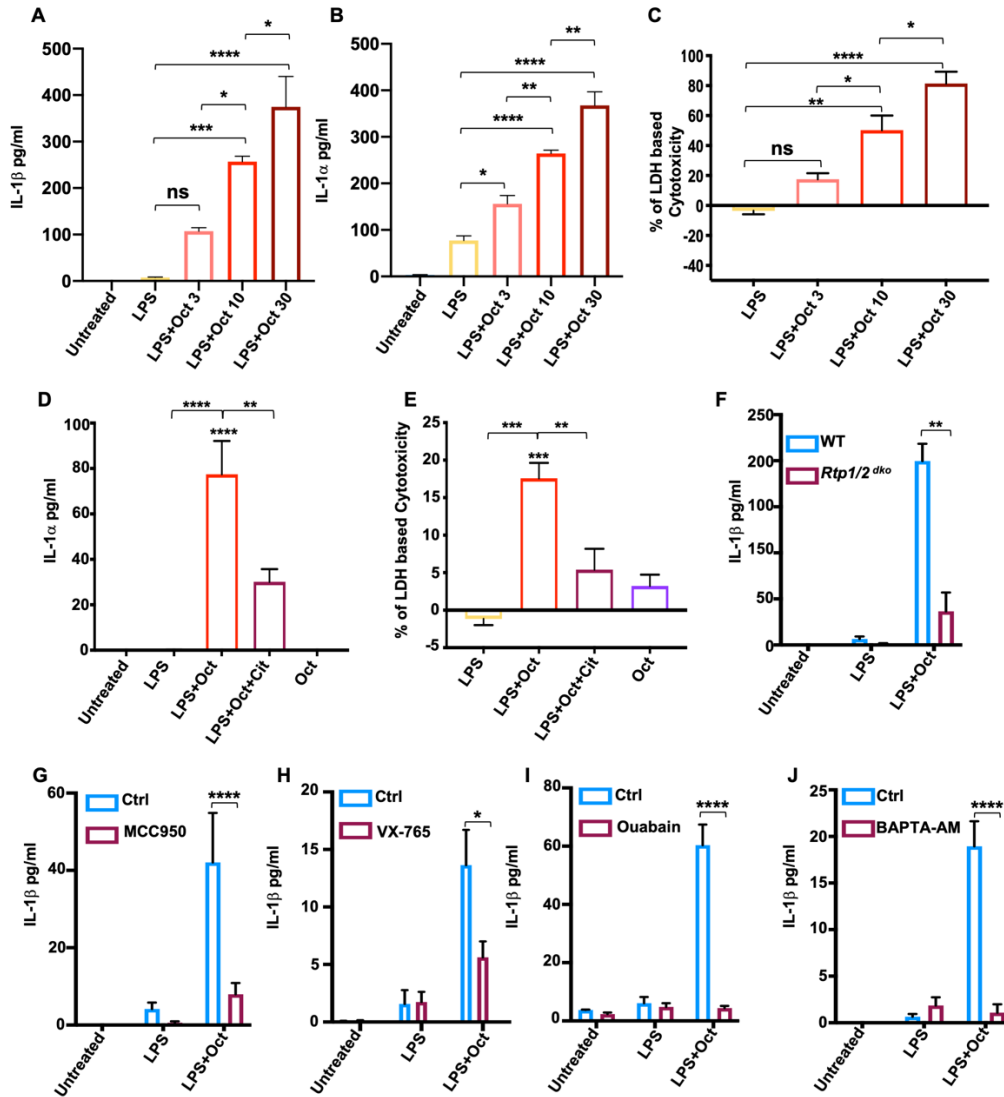

**Fig. S8. Octanal activates the inflammasome and induces LDH release in a dose-dependent manner.** (A-C) Octanal (Oct) dose response analysis on BMDMs. BMDMs were primed with LPS for 4h and treated with octanal (Oct, 3, 10, and 30 $\mu$ M) for 8h. Supernatant was harvested and analyzed for A) IL-1 $\beta$ , B) IL-1 $\alpha$  secretion and C) LDH release (cytotoxicity assay). N=3 per group. D) IL-1 $\alpha$  analysis of supernatant and E) LDH cytotoxicity assay from BMDM primed with LPS (50 ng/ml) for 4 h and subsequently stimulated with octanal (Oct) and citral (Cit) alone or combined for 8h. F) Production of IL-1 $\beta$ , from BMDM from *Rtp1/2*<sup>dko</sup> mice and *wt* mice stimulated with LPS (50ng/ml) for 4h and further incubated with Oct for 8h. G-I) BMDMs were harvested from *wt* mice and left untreated (left), treated with LPS (50ng/ml 4h) or LPS + octanal (10 $\mu$ M, 8h). G) Cells pretreated with the Nlrp3 blocker MCC950 (10 $\mu$ M, 1h), red columns. H) Cells pretreated with the caspase 1 inhibitor VX-765 (50 $\mu$ M, 1h), red columns. I) Cells pretreated with the GSDMD inhibitor Ouabain (50 $\mu$ M, 30min), red columns. J) Cells pretreated with the calcium chelator BAPTA-AM (10 $\mu$ M, 30 min), red columns. Data are presented as means  $\pm$  SEM. \*  $p < 0.05$ , \*\*  $p < 0.01$ , \*\*\*  $p < 0.001$ , \*\*\*\*  $p < 0.0001$ .  $p$  calculated by One-Way ANOVA test, Tukey's multiple comparisons test for A, B, C, D, and E; Two-Way ANOVA test, Tukey's multiple comparisons test for F, G, H, I and J.

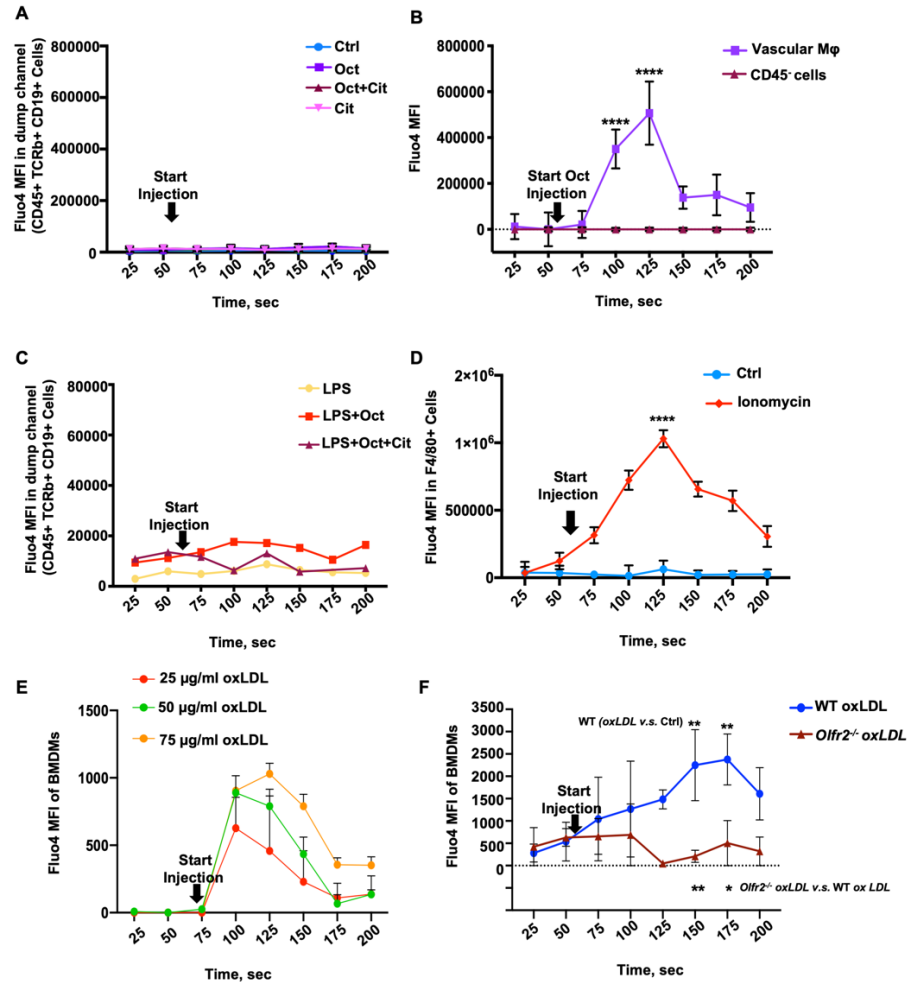

**Fig. S9. Calcium ( $\text{Ca}^{2+}$ ) signal detection in vascular cells and BMDMs.** **A-D)** Whole aorta cells were isolated, untreated or primed with LPS (500 ng/ml) for 1h and stained with Fluo4 (2  $\mu\text{M}$ ) at 37°C for 30 min, then washed and incubated with cell surface markers at RT for 20 min. **A)**  $\text{CD45}^+$ , Live, Dump channel $^+$  (containing  $\text{TCRb}^+$ , and  $\text{CD19}^+$ ) cells analyzed by flow cytometry. *Olf2* agonist Oct (10  $\mu\text{M}$ ) and antagonist Cit (100  $\mu\text{M}$ ) alone or combined (Oct+Cit) were added 60 seconds (sec) after the acquisition started. DMSO (1:1000) was injected as a control (Ctrl). **B)**  $\text{CD45}^+$ , Live, Dump channel $^-$ ,  $\text{F4/80}^+$  Vascular M $\phi$  and  $\text{CD45}^-$ , Live, cells analyzed by flow cytometry. *Olf2* agonist Oct (10  $\mu\text{M}$ ) was added 60 seconds (sec) after the acquisition started. DMSO (1:1000) was injected as a control (Ctrl). Ctrl subtracted data are shown. **C)** LPS primed dump channel $^+$  cells, before and after addition of *Olf2* agonist octanal (Oct 10  $\mu\text{M}$ ), and antagonist citral (Cit 100  $\mu\text{M}$ ) alone or combined (Oct+Cit). Octanal, and citral were injected at 60 seconds after the acquisition started. The time-averaged median fluorescence Intensity (MFI) of Fluo-4 is reported. **D)** Positive control:  $\text{F4/80}^+$  vascular macrophages were treated with ionomycin (at arrow). SEM is from 20-50 cells per time point. One representative experiment of three experiments is shown. **E-F)** Intracellular free calcium ( $\text{Ca}^{2+}$ ) in BMDMs from *wt*, and *Olf2* $^{-/-}$  mice. BMDMs were loaded with 2  $\mu\text{M}$  Fluo-4, pretreated with LPS for 1h and then treated with **E)** oxLDL at different doses (25, 50, and 75  $\mu\text{g/ml}$ ) or **F)** a single dose (75  $\mu\text{g/ml}$ ) at “start injection”. Fluo-4 Median Fluorescence Intensity (MFI) averaged over 25 sec intervals. 3 biological replicates for each time point are shown. Data are presented as mean  $\pm$  SEM. \*  $p < 0.05$ , \*\*  $p < 0.01$ , \*\*\*\*  $p < 0.0001$ .  $p$  is calculated by Two Way ANOVA test, Tukey's multiple comparisons test.

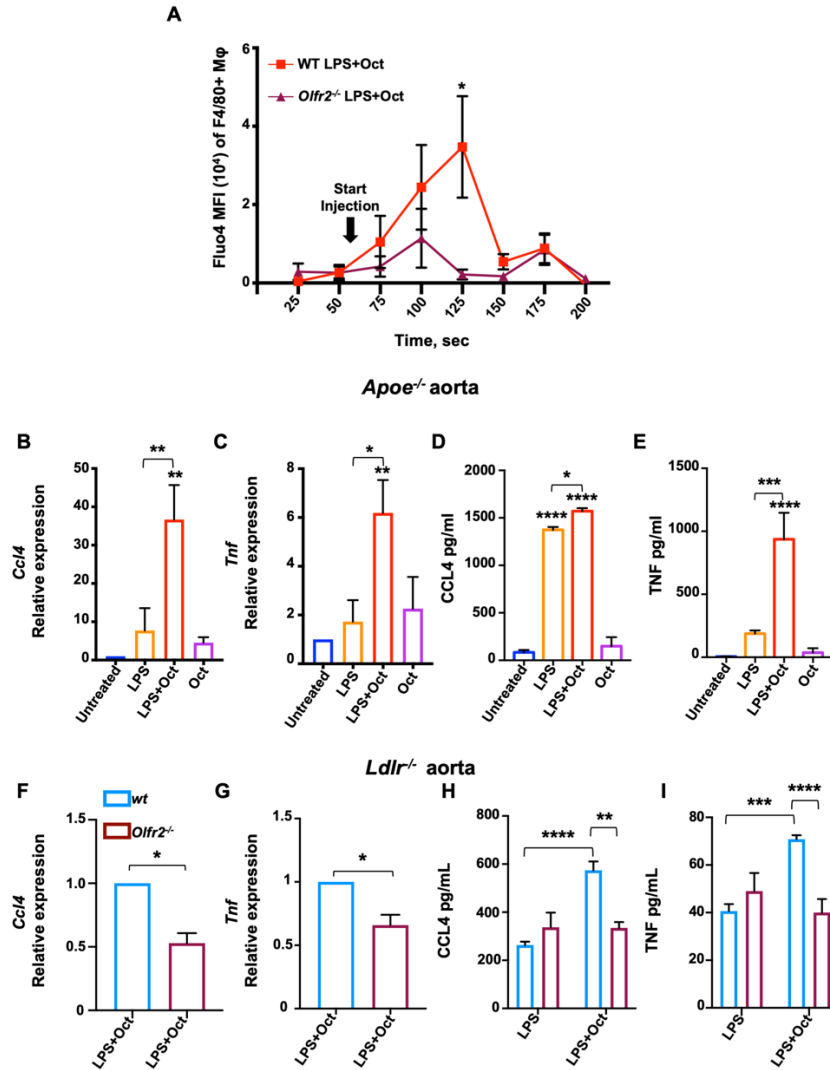

**Fig. S10. LPS priming of aorta increases octanal-mediated induction of proinflammatory cytokines secretion.** **A)** Mouse aortic cell suspensions from chimeric wt *Ldlr*<sup>-/-</sup> and *Olfr2*<sup>-/-</sup> *Ldlr*<sup>-/-</sup> mice, LPS pre-stimulated (500 ng/ml) for 1h and treated with octanal (Oct, 10 $\mu$ M). Treatment started at 60 seconds (sec) after the start of acquisition. Fluo-4 MFI at analyzed time intervals. SD is calculated for 20-50 cells at each time point. (n=4-5/group). **(B-E)** Whole aortas were untreated (DMSO 1:1000) or incubated with octanal, (10  $\mu$ M), LPS (500 ng/ml), or both for 12h. (n=5-6/group). **(B)** *Ccl4*, and **(C)** *Tnf* gene expression by RTqPCR. **(D-E)** protein quantification in supernatants of stimulated aortas by cytokine bead array. **(D)** CCL4, **(E)**, TNF. **(F-I)** Whole aortas from chimeric wt *Ldlr*<sup>-/-</sup> and *Olfr2*<sup>-/-</sup> *Ldlr*<sup>-/-</sup> mice were incubated with LPS (500 ng/ml) alone or combined with octanal for 12h. (n= 6/group). **(F)** *Ccl4*, and **(G)** *Tnf* gene expression by RTqPCR. **(H-I)** protein quantification in supernatants of stimulated aortas by cytokine bead array. **(H)** CCL4, **(I)**, TNF. Data are presented as mean  $\pm$  SEM. \* p < 0.05, \*\* p < 0.01, \*\*\* p < 0.001, \*\*\*\* p < 0.0001. p calculated by Two-Way ANOVA test, Tukey's multiple comparisons for **A**, **H** and **I**; One-Way ANOVA test, Tukey's multiple comparisons test for **B-E**; unpaired t-test with Welch correction for **F** and **G**.

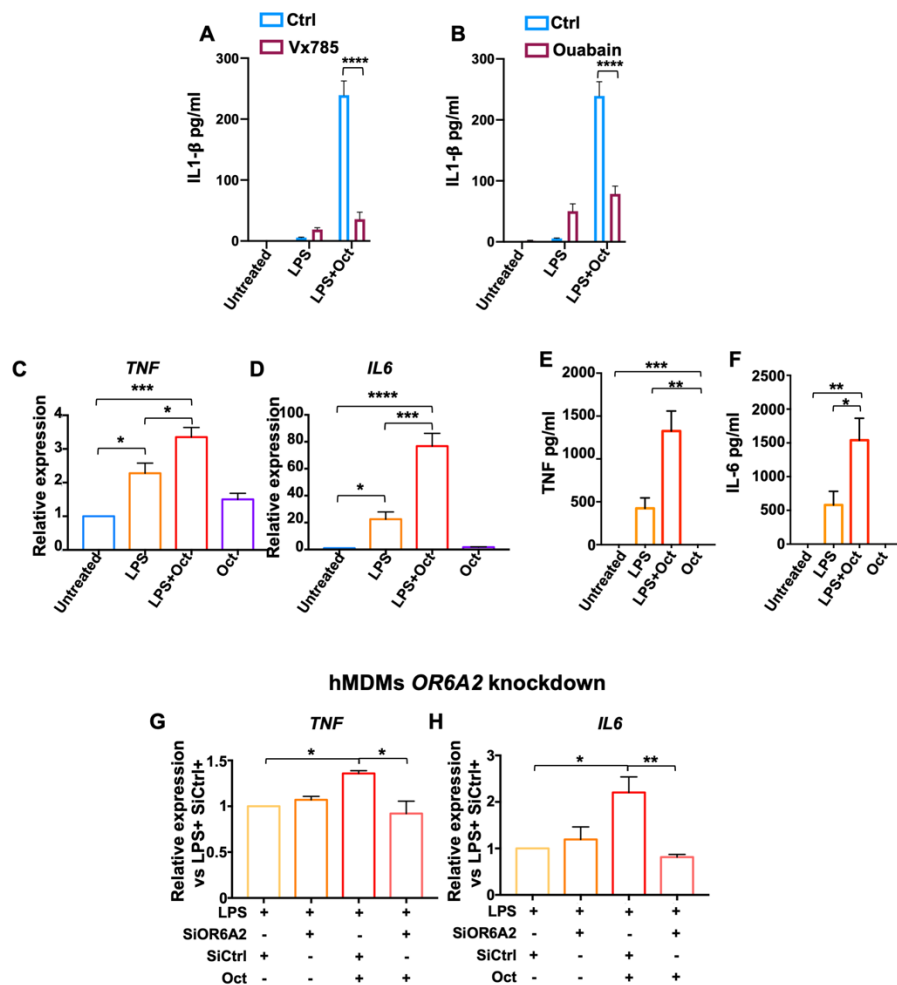

**Fig. S11. OR6A2 mediates octanal-induced activation of human MDMs.** Monocytes from healthy human donors were differentiated into macrophages (hMDMs). **A-B**) To study the inflammasome pathway, hMDMs were primed with LPS (50 ng/ml 4h) and then treated with octanal (10  $\mu$ M) or untreated (DMSO 1:1000) for 8h. **A**) Cells pretreated with the caspase 1 inhibitor VX-765 (50 $\mu$ M, 1h), red columns. **B**) Cells pretreated with the GSDMD inhibitor Ouabain (50 $\mu$ M, 30min), red columns. **(C-F)** hMDM were untreated or incubated with octanal (Oct, 10  $\mu$ M) and LPS, (500 ng/ml) alone or combined (LPS+Oct) for 12h. RTqPCR was performed to detect human **C**) *TNF*, and **D**) *IL6*, gene expression. Relative expression was normalized to *GAPDH* expression and untreated control (n=4/group). **E**) TNF and **F**) IL-6 protein secretion was measured in the cell supernatants by cytometric bead array. **(G-H)** hMDM were transfected with *OR6A2* small interfering RNAs (SiORA6A2) or scrambled control siRNAs (SiCtrl). After 48h, hMDM were treated with LPS (500 ng/ml) alone or combined with Oct (10  $\mu$ M) for 12 h. **G**) *TNF* and **H**) *IL6* gene expression analysis was analyzed by RTqPCR and normalized to *GAPDH* and LPS siCtrl treated controls (n=5/group). Data are presented as mean  $\pm$  SEM. \*  $p < 0.05$ , \*\*  $p < 0.01$ , \*\*\*  $p < 0.005$ , \*\*\*\*  $p < 0.001$ .  $p$  calculated by Two-Way ANOVA test, Tukey's multiple comparisons for **A** and **B** One-Way ANOVA test, Tukey's multiple comparisons test for **C-G**.



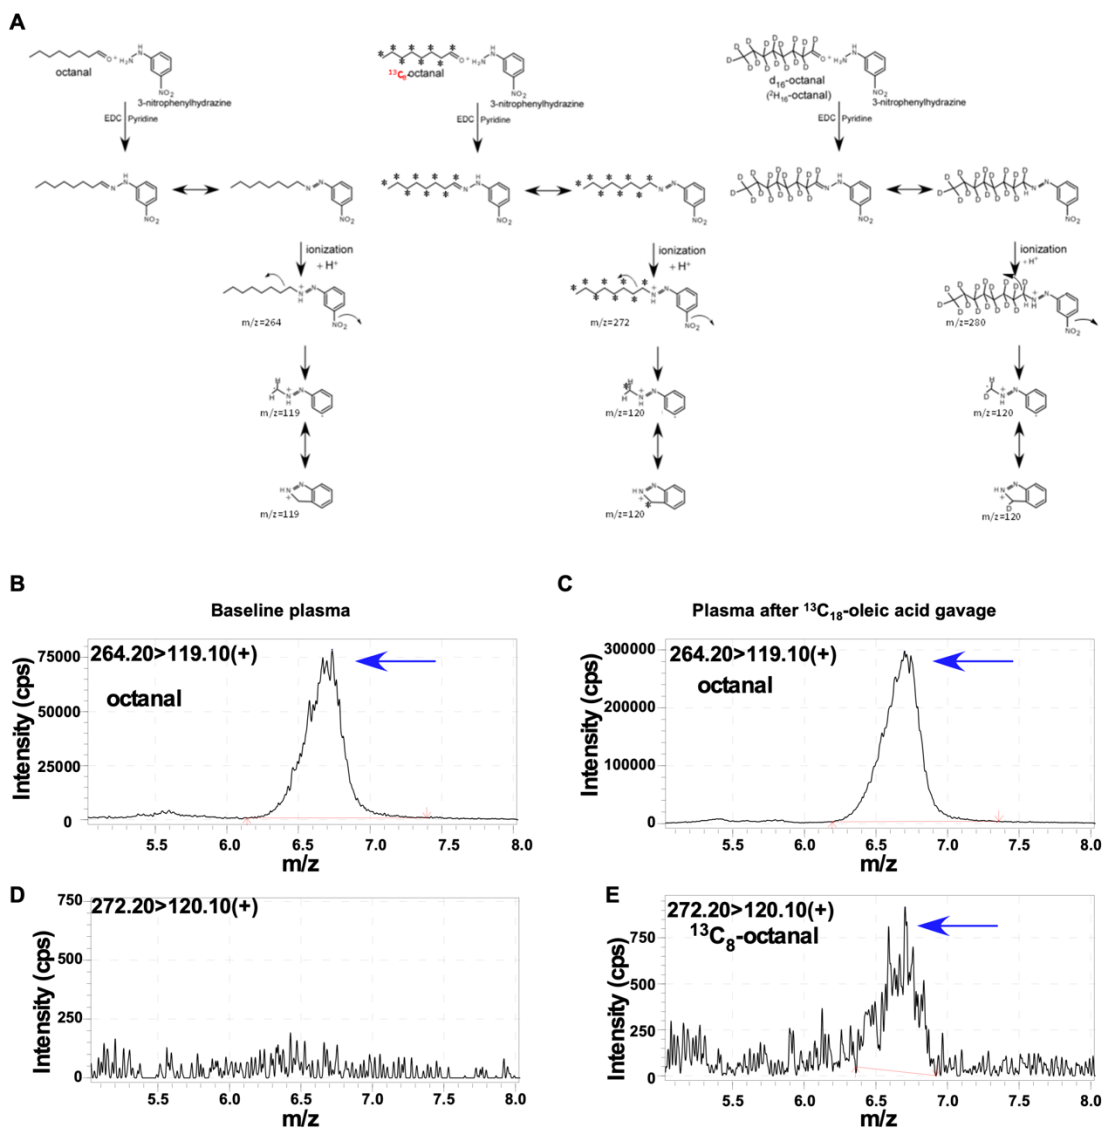

**Fig. S12. <sup>13</sup>C<sub>8</sub>octanal detection by mass spectrometry.** A) Structural formulae of octanal, <sup>13</sup>C<sub>8</sub>octanal and d<sub>16</sub>octanal derivatives after reaction with 3-nitrophenylhydrazine and their respective daughter ion formation during collision induced dissociation.

Extracted ion LC chromatograms in positive-ion multiple reaction monitoring (MRM) mode of octanal (B, C), <sup>13</sup>C<sub>8</sub>octanal (D, E) derivatives after reaction with 3-nitrophenylhydrazine with parent to daughter transitions, 264.2→119.1, and 272.2→120.1, respectively. Plasma was collected 24h after gavage with 3 mg <sup>13</sup>C<sub>18</sub>oleic acid (C, E). Plasma collected before gavage was used as baseline (B, D).



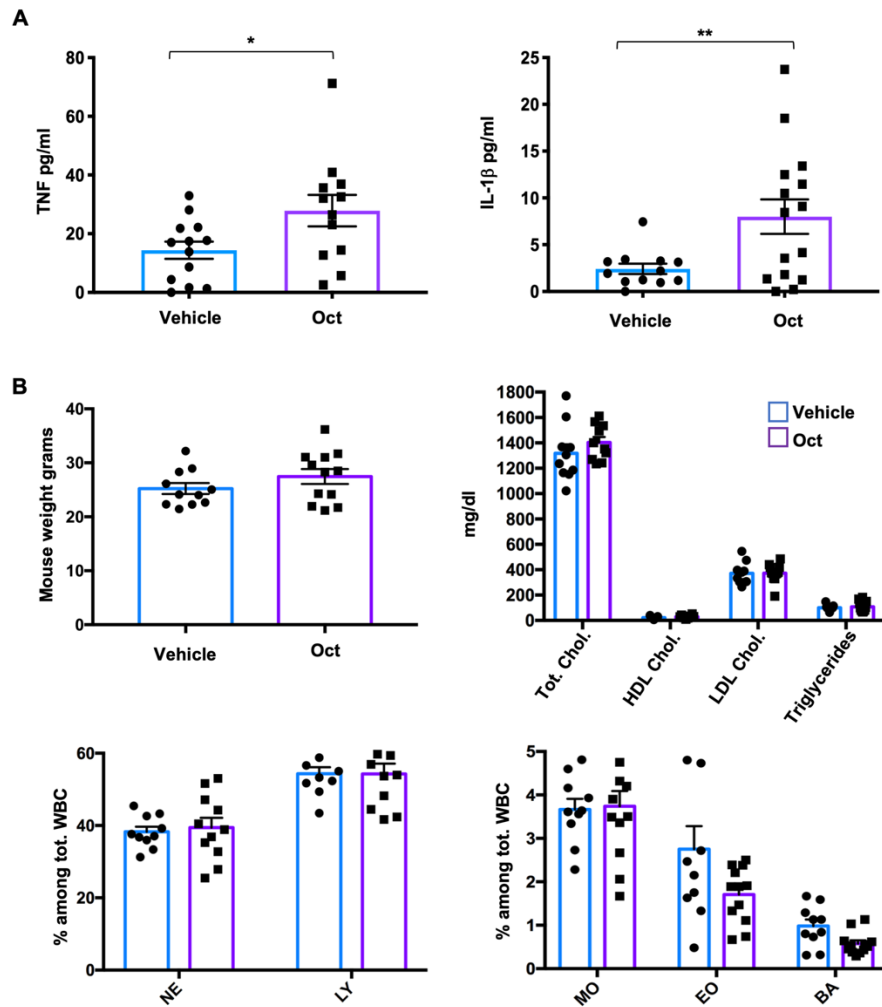

**Fig. S13. Systemic cytokines and body parameters after in vivo octanal treatment. A)** TNF and IL-1 $\beta$  levels in plasma of mice treated with octanal as described in **Fig. 4A**. **B)** Body weight, blood lipids and hematological parameters for octanal treated mice related to **Fig. 4B-E**. Neutrophils (NE), Lymphocytes (LY), Monocytes (MO), Eosinophils (EO) and Basophils (BA) % among total white blood cells is reported. Data are presented as mean  $\pm$  SEM. \*  $p < 0.05$ , \*\*  $p < 0.01$ .  $p$  calculated by unpaired T test with Welch correction and by Two-Way ANOVA test, Tukey's multiple comparisons test when appropriate.

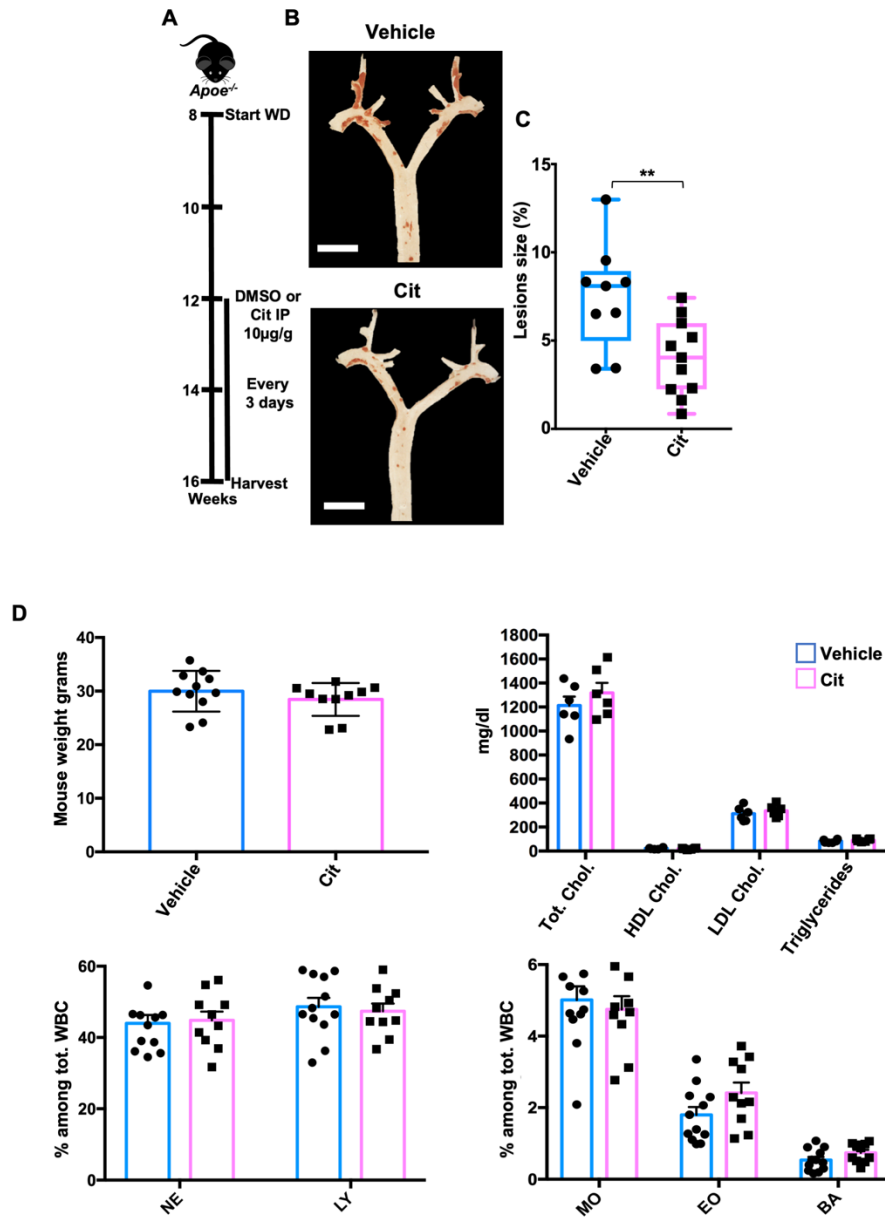

**Fig. S14. Citral treatment reduces atherosclerosis in *Apoe*<sup>-/-</sup> mice.** **A)** En face atherosclerosis quantification in vehicle- or citral- (10 µg/g) treated mice. *Apoe*<sup>-/-</sup> mice (n=9-11/group) were fed WD for 4 weeks and then injected every three days intraperitoneally with vehicle (PBS+1:1000 DMSO), citral (Cit, 10 mg/kg), for the last 4 weeks for a total of 8 wks WD. **B)** Representative images of pinned aortic arches of vehicle- or citral-treated mice. Scale bar = 0.5 cm. **C)** Aortic arch lesion size of citral-treated mice displayed as percentage of total area analyzed. **D)** Body weight, blood lipids and hematological parameters of citral-treated mice. Abbreviations as in **Fig. S13**. Data are presented as mean ± SEM. \*\* *p* < 0.01. *p* calculated by unpaired T test with Welch correction and by Two-Way ANOVA test, Tukey's multiple comparisons test when appropriate.

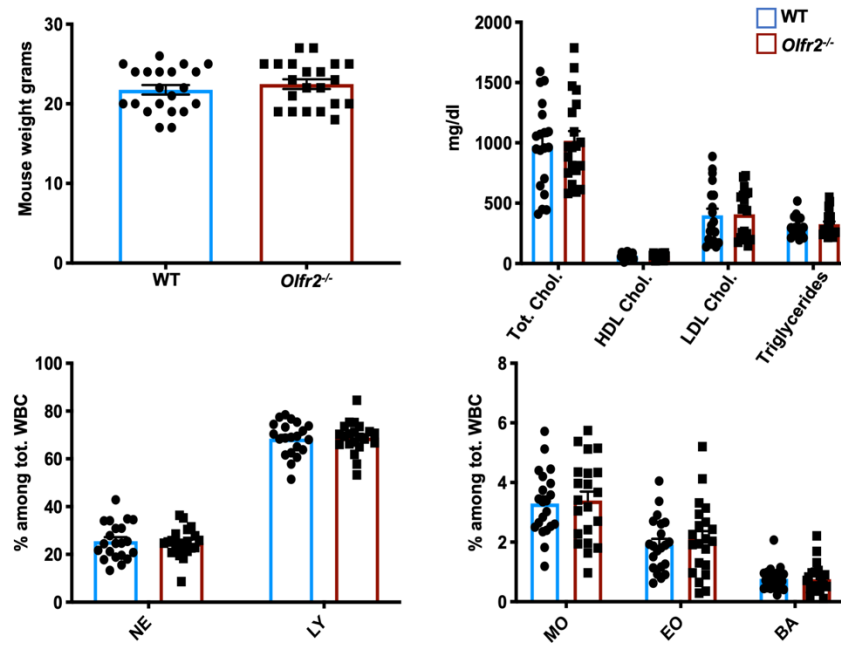

**Fig. S15. *Olfr2*<sup>-/-</sup> bone marrow transplantation into *Ldlr*<sup>-/-</sup> mice.** Body weight, blood lipids and hematological parameters, in *Ldlr*<sup>-/-</sup> mice transplanted with *wt*, or *Olfr2*<sup>-/-</sup> bone marrow cells and fed high cholesterol diet for 12 wks (Fig. 4F to O). Abbreviations as in Fig. S13. Data are presented as mean ± SEM. *p* calculated by unpaired T test with Welch correction and by Two-Way ANOVA test, Tukey's multiple comparisons test when appropriate.

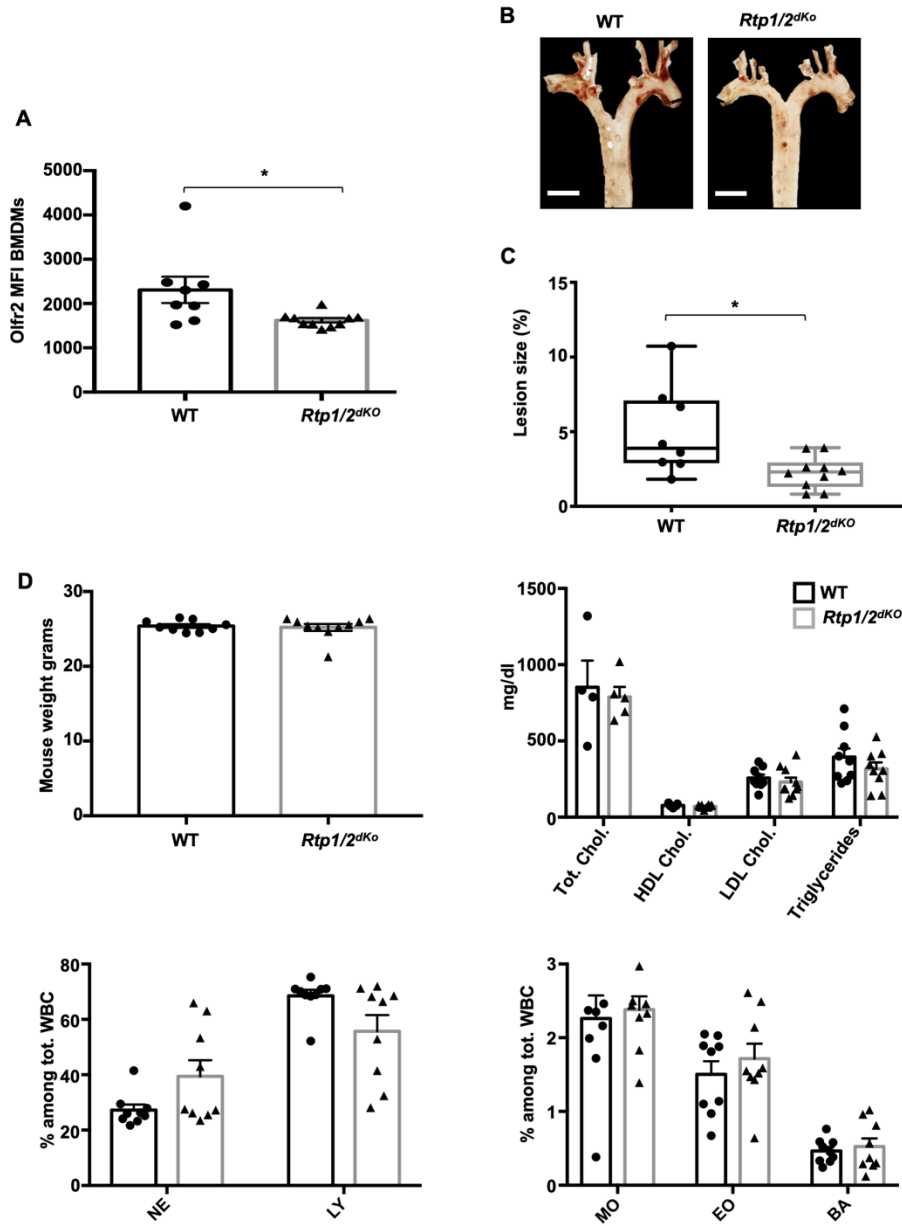

**Fig. S16. *Rtp1/Rtp2<sup>dKO</sup>* bone marrow transplantation into *Ldlr<sup>-/-</sup>* mice.** *Ldlr<sup>-/-</sup>* male mice (n= 8-10/group) were lethally irradiated and reconstituted with *wt* or *Rtp1/2<sup>dKO</sup>* bone marrow cells and fed high cholesterol diet for 12 wks. **A)** Olf2 expression on BMDM from *Rtp1/2<sup>dKO</sup>* *Ldlr<sup>-/-</sup>* chimeric mice by flow cytometry. **B)** Representative images of pinned aortic arches. Scale bar = 0.5 cm **C)** En face lesion size quantification as percent of analyzed aortic arch area. **D)** Body weight, blood lipids and hematological parameters from BM transplanted mice. Abbreviations as in **Fig. S13**. Data are presented as mean ± SEM. \*  $p < 0.05$ .  $p$  calculated by unpaired T test with Welch correction and by Two-Way ANOVA test, Tukey's multiple comparisons test when appropriate.

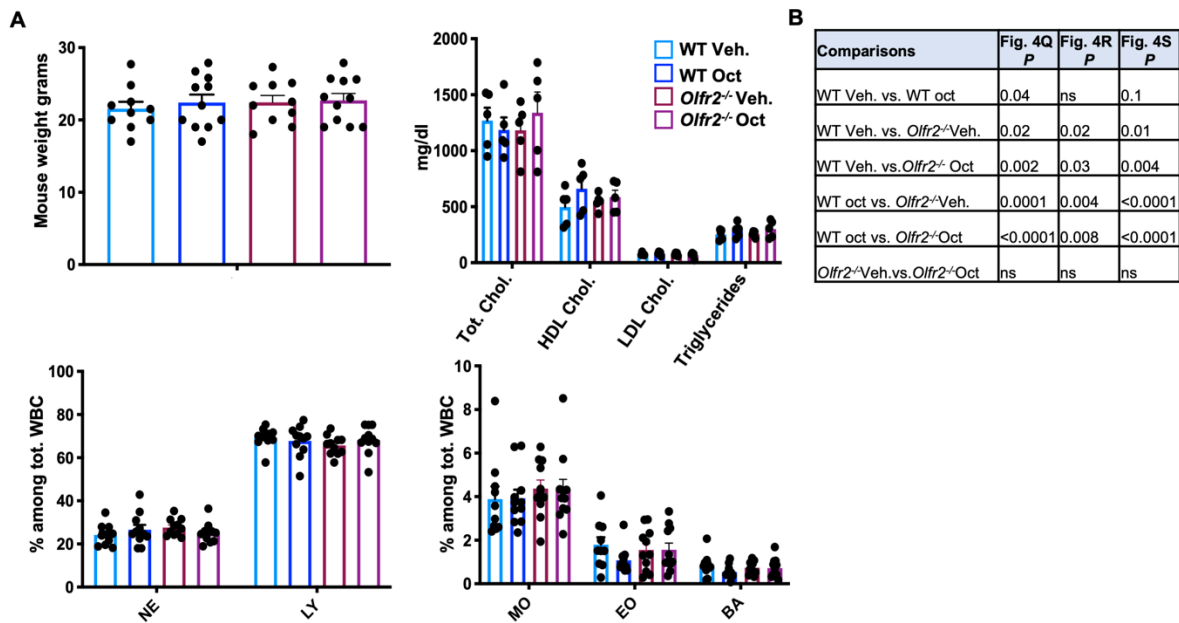

**Fig. S17. *Olfr2*<sup>-/-</sup> bone marrow transplantation into *Ldlr*<sup>-/-</sup> mice with and without octanal treatment.** **A)** Body weight, blood lipids and hematological parameters, in *Ldlr*<sup>-/-</sup> mice transplanted with *wt*, or *Olfr2*<sup>-/-</sup> bone marrow cells and fed high cholesterol diet for 8 weeks, then injected every three days intraperitoneally with octanal (Oct, 10 µg/g) or Vehicle (Veh.; DMSO 1:1000) for the last 4 weeks for a total of 12 wks HCD (Fig. 4P to O). Abbreviations as in Fig. S13. Data are presented as mean ± SEM. *p* calculated by Two-Way ANOVA test, Tukey's multiple comparisons test. **B)** Table reporting multiple comparison analysis and respective *p* values (*P*) of Fig. 4Q, R and S (section 624).

### 3. Supplementary Material Tables

**Table S1: Demographics and clinical characteristics**

| <b>Characteristic</b>                        | <b>All Subjects<br/>( N=196)</b> |
|----------------------------------------------|----------------------------------|
| <b>Age (yr)</b>                              | 66.5±10.1                        |
| <b>Male (%)</b>                              | 66.8                             |
| <b>Diabetes (%)</b>                          | 4.6                              |
| <b>Hypertension (%)</b>                      | 66.8                             |
| <b>Smoking (%)</b>                           | 60.2                             |
| <b>BMI</b>                                   | 27.4(25.0-30.5)                  |
| <b>LDL-c(mg dl<sup>-1</sup>)</b>             | 93.5(73.0-115.3)                 |
| <b>HDL-c(mg dl<sup>-1</sup>)</b>             | 33.6(29.0-40.9)                  |
| <b>Total cholesterol(mg dl<sup>-1</sup>)</b> | 161.0(137.9-184.2)               |
| <b>Triglycerides(mg dl<sup>-1</sup>)</b>     | 114.5(85.0-175.2)                |
| <b>Statin usage (%)</b>                      | 44.4                             |
| <b>Aspirin (%)</b>                           | 62.2                             |
| <b>Diabetes Medication (%)</b>               | 3.6                              |

**Table S2: Octanal ( $\mu\text{M}$ ) correlations**

| name                                     | rho    | P value       |
|------------------------------------------|--------|---------------|
| Age                                      | 0.0006 | 0.99          |
| MALE                                     | 0.007  | 0.92          |
| BMI                                      | 0.089  | 0.21          |
| Glucose                                  | -0.18  | <b>0.013</b>  |
| HDL ( $\text{mg dl}^{-1}$ )              | 0.012  | 0.87          |
| LDL ( $\text{mg dl}^{-1}$ )              | 0.19   | <b>0.007</b>  |
| Total cholesterol( $\text{mg dl}^{-1}$ ) | 0.26   | <b>0.0002</b> |
| NON-HDL                                  | 0.27   | <b>0.0001</b> |
| Triglycerides( $\text{mg dl}^{-1}$ )     | 0.24   | <b>0.0006</b> |

P values calculated by Spearman's rank correlation

**Table S3 DE genes FDR<0.05 LPS vs Control BMDMs**

| Accession          | baseMean  | log2FC | lfcSE | stat   | pvalue   | padj       | Gene name     |
|--------------------|-----------|--------|-------|--------|----------|------------|---------------|
| ENSMUSG00000020826 | 37203.302 | 18.483 | 1.717 | 10.763 | 5.1E-27  | 1.2765E-25 | Nos2          |
| ENSMUSG00000060183 | 7742.955  | 12.204 | 1.278 | 9.551  | 1.3E-21  | 2.538E-20  | Cxcl11        |
| ENSMUSG00000055170 | 432.637   | 11.982 | 1.206 | 9.936  | 2.9E-23  | 6.177E-22  | Ifng          |
| ENSMUSG00000054958 | 181.446   | 11.169 | 1.212 | 9.214  | 3.1E-20  | 5.7462E-19 | Nt5c1a        |
| ENSMUSG00000023959 | 454.355   | 9.919  | 1.194 | 8.310  | 9.6E-17  | 1.4245E-15 | Clic5         |
| ENSMUSG00000038067 | 1167.153  | 9.804  | 1.553 | 6.314  | 2.7E-10  | 2.516E-09  | Csf3          |
| ENSMUSG00000022938 | 151.530   | 9.803  | 1.123 | 8.728  | 2.6E-18  | 4.2482E-17 | Fam3b         |
| ENSMUSG00000016524 | 161.282   | 9.772  | 1.213 | 8.057  | 7.8E-16  | 1.0987E-14 | Il19          |
| ENSMUSG00000048806 | 270.658   | 9.764  | 1.243 | 7.853  | 4.1E-15  | 5.4094E-14 | Ifnb1         |
| ENSMUSG00000102518 | 29.830    | 9.576  | 1.457 | 6.575  | 4.9E-11  | 4.7909E-10 | Gm38339       |
| ENSMUSG00000105096 | 102.032   | 9.528  | 1.257 | 7.577  | 3.5E-14  | 4.431E-13  | Gbp10         |
| ENSMUSG00000074115 | 116.445   | 9.523  | 1.225 | 7.776  | 7.5E-15  | 9.7421E-14 | Saa1          |
| ENSMUSG00000082976 | 1805.110  | 9.304  | 0.468 | 19.884 | 5.6E-88  | 7.8955E-86 | Gm15056       |
| ENSMUSG00000082079 | 52.565    | 9.287  | 1.886 | 4.924  | 8.5E-07  | 5.3634E-06 | Dnmt3c        |
| ENSMUSG00000074695 | 79.815    | 8.992  | 1.299 | 6.920  | 4.5E-12  | 4.8523E-11 | Il22          |
| ENSMUSG00000101264 | 69.691    | 8.930  | 1.245 | 7.173  | 7.3E-13  | 8.3578E-12 | Gm28347       |
| ENSMUSG00000040298 | 25.549    | 8.924  | 1.657 | 5.386  | 7.2E-08  | 5.2409E-07 | Btbd16        |
| ENSMUSG00000097418 | 1507.997  | 8.907  | 0.380 | 23.457 | 1.1E-121 | 3.581E-119 | Mir155hg      |
| ENSMUSG00000119627 | 60.707    | 8.818  | 1.230 | 7.169  | 7.6E-13  | 8.6179E-12 | AC102108.1    |
| ENSMUSG00000086515 | 20.166    | 8.715  | 1.317 | 6.618  | 3.6E-11  | 3.6153E-10 | Erich2os      |
| ENSMUSG00000026984 | 396.354   | 8.703  | 0.573 | 15.197 | 3.7E-52  | 2.178E-50  | Il1f6         |
| ENSMUSG00000034855 | 99222.272 | 8.700  | 0.573 | 15.195 | 3.8E-52  | 2.2221E-50 | Cxcl10        |
| ENSMUSG00000029417 | 3220.983  | 8.668  | 0.591 | 14.678 | 8.9E-49  | 4.7227E-47 | Cxcl9         |
| ENSMUSG00000095834 | 17.204    | 8.549  | 1.392 | 6.140  | 8.3E-10  | 7.3315E-09 | Tdgfl-ps1     |
| ENSMUSG00000063388 | 1043.345  | 8.543  | 0.632 | 13.521 | 1.2E-41  | 5.058E-40  | BC023105      |
| ENSMUSG00000043050 | 20.685    | 8.337  | 1.475 | 5.654  | 1.6E-08  | 1.2243E-07 | Tnp2          |
| ENSMUSG00000050440 | 53.664    | 8.336  | 1.287 | 6.475  | 9.5E-11  | 9.0915E-10 | Hamp          |
| ENSMUSG00000078922 | 1583.672  | 8.318  | 0.465 | 17.897 | 1.2E-71  | 1.2224E-69 | Tgtp1         |
| ENSMUSG00000050468 | 15.986    | 8.311  | 1.512 | 5.498  | 3.8E-08  | 2.8774E-07 | Astl          |
| ENSMUSG00000098434 | 231.302   | 8.273  | 1.005 | 8.231  | 1.9E-16  | 2.7115E-15 | 2010110E17Rik |
| ENSMUSG00000055102 | 23.952    | 8.130  | 1.806 | 4.502  | 6.7E-06  | 3.8259E-05 | Zfp819        |
| ENSMUSG00000108650 | 31.152    | 8.117  | 1.454 | 5.582  | 2.4E-08  | 1.8219E-07 | Gm44867       |
| ENSMUSG00000112198 | 21.302    | 7.984  | 1.432 | 5.576  | 2.5E-08  | 1.8815E-07 | Gm4065        |
| ENSMUSG00000024810 | 751.490   | 7.955  | 1.307 | 6.085  | 1.2E-09  | 1.0207E-08 | Il33          |
| ENSMUSG00000068606 | 750.245   | 7.937  | 0.399 | 19.898 | 4.3E-88  | 6.1874E-86 | Gm4841        |
| ENSMUSG00000105504 | 13364.416 | 7.877  | 0.614 | 12.819 | 1.3E-37  | 4.864E-36  | Gbp5          |
| ENSMUSG00000044701 | 13119.681 | 7.859  | 0.336 | 23.363 | 1.0E-120 | 2.988E-118 | Il27          |
| ENSMUSG00000000247 | 1843.589  | 7.839  | 0.709 | 11.061 | 1.9E-28  | 5.1374E-27 | Lhx2          |
| ENSMUSG00000089898 | 27.496    | 7.772  | 1.356 | 5.732  | 9.9E-09  | 7.9432E-08 | Gm14199       |
| ENSMUSG00000027398 | 12520.012 | 7.725  | 0.392 | 19.687 | 2.8E-86  | 3.8379E-84 | Il1b          |
| ENSMUSG00000087256 | 22.018    | 7.690  | 1.559 | 4.934  | 8.1E-07  | 5.1164E-06 | Gm15990       |
| ENSMUSG00000020332 | 12.198    | 7.645  | 1.444 | 5.293  | 1.2E-07  | 8.5487E-07 | Meikin        |
| ENSMUSG00000050511 | 19.627    | 7.617  | 1.371 | 5.555  | 2.8E-08  | 2.1122E-07 | Oprd1         |
| ENSMUSG00000083645 | 10.071    | 7.588  | 1.481 | 5.122  | 3.0E-07  | 2.0282E-06 | Gm14086       |
| ENSMUSG00000079339 | 26963.387 | 7.567  | 0.639 | 11.839 | 2.5E-32  | 7.6435E-31 | Ifit1b11      |
| ENSMUSG00000079363 | 11079.303 | 7.550  | 0.512 | 14.732 | 4.0E-49  | 2.1579E-47 | Gbp4          |
| ENSMUSG00000087242 | 4.377     | 7.454  | 2.666 | 2.796  | 5.2E-03  | 0.01759641 | C78197        |
| ENSMUSG00000020407 | 15175.300 | 7.447  | 0.215 | 34.712 | 5.2E-264 | 1.55E-260  | Upp1          |
| ENSMUSG00000079014 | 113.600   | 7.438  | 1.212 | 6.137  | 8.4E-10  | 7.4608E-09 | Serpina3i     |



|                    |            |       |       |        |          |            |               |
|--------------------|------------|-------|-------|--------|----------|------------|---------------|
| ENSMUSG00000021118 | 27.190     | 7.409 | 1.608 | 4.607  | 4.1E-06  | 2.3934E-05 | Plek2         |
| ENSMUSG00000042212 | 11.107     | 7.394 | 1.795 | 4.119  | 3.8E-05  | 0.000193   | Sprr2d        |
| ENSMUSG00000035042 | 201663.893 | 7.393 | 0.281 | 26.305 | 1.7E-152 | 9.003E-150 | Ccl5          |
| ENSMUSG00000049093 | 242.637    | 7.371 | 0.513 | 14.378 | 7.1E-47  | 3.5715E-45 | Il23r         |
| ENSMUSG00000106773 | 15.092     | 7.349 | 1.591 | 4.620  | 3.8E-06  | 2.2566E-05 | Gm43799       |
| ENSMUSG00000066363 | 2878.715   | 7.301 | 0.596 | 12.252 | 1.6E-34  | 5.5594E-33 | Serpina3f     |
| ENSMUSG00000053846 | 5792.228   | 7.218 | 0.442 | 16.313 | 8.0E-60  | 5.8337E-58 | Lipg          |
| ENSMUSG00000031257 | 7.388      | 7.192 | 1.679 | 4.283  | 1.8E-05  | 9.8189E-05 | Nox1          |
| ENSMUSG00000050010 | 365.783    | 7.188 | 0.501 | 14.358 | 9.5E-47  | 4.7031E-45 | Shisa3        |
| ENSMUSG00000054203 | 27653.264  | 7.178 | 0.617 | 11.628 | 3.0E-31  | 8.7308E-30 | Ifi205        |
| ENSMUSG00000029409 | 1156.259   | 7.178 | 0.563 | 12.755 | 2.9E-37  | 1.0897E-35 | U90926        |
| ENSMUSG00000033213 | 9115.852   | 7.138 | 0.300 | 23.757 | 9.4E-125 | 3.091E-122 | AA467197      |
| ENSMUSG00000107666 | 2.882      | 7.116 | 2.157 | 3.299  | 9.7E-04  | 0.003853   | 4933406J09Rik |
| ENSMUSG00000073008 | 15.452     | 7.085 | 1.482 | 4.782  | 1.7E-06  | 1.0629E-05 | Gpr174        |
| ENSMUSG00000028270 | 74471.478  | 7.082 | 0.520 | 13.631 | 2.6E-42  | 1.1683E-40 | Gbp2          |
| ENSMUSG00000051503 | 3.401      | 7.075 | 2.491 | 2.840  | 4.5E-03  | 0.015592   | Gm6583        |
| ENSMUSG00000104340 | 68.788     | 7.045 | 1.535 | 4.588  | 4.5E-06  | 2.5995E-05 | Gm10522       |
| ENSMUSG00000103440 | 2.749      | 7.031 | 2.832 | 2.483  | 1.3E-02  | 0.03949647 | Gm37131       |
| ENSMUSG00000033967 | 220.866    | 7.026 | 0.591 | 11.894 | 1.3E-32  | 4.0151E-31 | Rnf225        |
| ENSMUSG00000103001 | 5.880      | 7.016 | 1.730 | 4.055  | 5.0E-05  | 0.00025069 | A930005N03Rik |
| ENSMUSG00000014773 | 236.031    | 6.999 | 1.325 | 5.282  | 1.3E-07  | 9.033E-07  | Dll1          |
| ENSMUSG00000114736 | 25.385     | 6.978 | 1.208 | 5.777  | 7.6E-09  | 6.1469E-08 | Gm47336       |
| ENSMUSG00000109167 | 5.517      | 6.974 | 1.887 | 3.695  | 2.2E-04  | 0.00098453 | Gm44652       |
| ENSMUSG00000027270 | 23.437     | 6.931 | 1.604 | 4.321  | 1.6E-05  | 8.3695E-05 | Lamp5         |
| ENSMUSG00000075010 | 71336.808  | 6.930 | 0.346 | 20.009 | 4.6E-89  | 6.7757E-87 | AW112010      |
| ENSMUSG00000108060 | 26.945     | 6.920 | 1.469 | 4.712  | 2.5E-06  | 1.4776E-05 | 4921529L05Rik |
| ENSMUSG00000038580 | 79.147     | 6.917 | 0.908 | 7.616  | 2.6E-14  | 3.3016E-13 | Sct           |
| ENSMUSG00000117103 | 9.714      | 6.888 | 1.511 | 4.560  | 5.1E-06  | 2.9469E-05 | Gm49916       |
| ENSMUSG00000116935 | 369.076    | 6.863 | 0.345 | 19.904 | 3.7E-88  | 5.4514E-86 | Gpr31a        |
| ENSMUSG00000050737 | 22848.662  | 6.842 | 0.201 | 33.963 | 7.9E-253 | 1.722E-249 | Ptges         |
| ENSMUSG00000116702 | 198.193    | 6.830 | 0.492 | 13.887 | 7.6E-44  | 3.4978E-42 | Gm6553        |
| ENSMUSG00000037279 | 5.339      | 6.824 | 2.555 | 2.671  | 7.6E-03  | 0.02452215 | Ovol2         |
| ENSMUSG00000030156 | 21124.338  | 6.822 | 0.329 | 20.740 | 1.5E-95  | 2.5197E-93 | Cd69          |
| ENSMUSG00000111078 | 97.780     | 6.821 | 0.636 | 10.731 | 7.2E-27  | 1.7818E-25 | Gm35028       |
| ENSMUSG00000020383 | 5.377      | 6.801 | 1.901 | 3.577  | 3.5E-04  | 0.001504   | Il13          |
| ENSMUSG00000116929 | 4.803      | 6.796 | 1.785 | 3.807  | 1.4E-04  | 0.00065173 | 2210009P08Rik |
| ENSMUSG00000000204 | 17567.040  | 6.767 | 0.522 | 12.951 | 2.3E-38  | 8.9766E-37 | Slfn4         |
| ENSMUSG00000020081 | 14.388     | 6.748 | 1.693 | 3.985  | 6.7E-05  | 0.00032963 | Tacr2         |
| ENSMUSG00000115979 | 5.832      | 6.718 | 2.493 | 2.695  | 7.0E-03  | 0.0230487  | Gm49410       |
| ENSMUSG00000085124 | 7.036      | 6.694 | 1.538 | 4.353  | 1.3E-05  | 7.2885E-05 | Gm12766       |
| ENSMUSG00000104272 | 13.173     | 6.646 | 1.677 | 3.963  | 7.4E-05  | 0.00035897 | Gm38297       |
| ENSMUSG00000018925 | 29.060     | 6.641 | 1.393 | 4.769  | 1.8E-06  | 1.1268E-05 | Heatr9        |
| ENSMUSG00000037202 | 31.300     | 6.634 | 1.456 | 4.557  | 5.2E-06  | 2.9787E-05 | Prfl          |
| ENSMUSG00000079645 | 4.991      | 6.616 | 1.689 | 3.917  | 9.0E-05  | 0.00042931 | Gm17193       |
| ENSMUSG00000070533 | 28.839     | 6.612 | 1.119 | 5.906  | 3.5E-09  | 2.9252E-08 | Wfdc8         |
| ENSMUSG00000040978 | 75.255     | 6.611 | 1.368 | 4.832  | 1.4E-06  | 8.3915E-06 | Gm11992       |
| ENSMUSG00000079598 | 2.545      | 6.607 | 2.639 | 2.503  | 1.2E-02  | 0.03758036 | Clec2l        |
| ENSMUSG00000029706 | 23.910     | 6.579 | 1.677 | 3.922  | 8.8E-05  | 0.00042113 | Pax4          |
| ENSMUSG00000100843 | 8.291      | 6.548 | 1.808 | 3.621  | 2.9E-04  | 0.00128504 | Gm8307        |
| ENSMUSG00000099472 | 11.966     | 6.545 | 1.463 | 4.474  | 7.7E-06  | 4.3251E-05 | Gm29539       |
| ENSMUSG00000097030 | 2.524      | 6.540 | 2.203 | 2.969  | 3.0E-03  | 0.01075624 | Gm26693       |
| ENSMUSG00000111857 | 6.127      | 6.481 | 1.749 | 3.706  | 2.1E-04  | 0.00094883 | 1190001M18Rik |

|                    |            |       |       |        |          |            |               |
|--------------------|------------|-------|-------|--------|----------|------------|---------------|
| ENSMUSG00000117446 | 5.439      | 6.468 | 2.122 | 3.048  | 2.3E-03  | 0.00849879 | Gm35551       |
| ENSMUSG00000090042 | 5.373      | 6.457 | 1.694 | 3.811  | 1.4E-04  | 0.0006427  | Gm8550        |
| ENSMUSG00000046999 | 89.279     | 6.446 | 0.879 | 7.337  | 2.2E-13  | 2.608E-12  | 1110032F04Rik |
| ENSMUSG00000076518 | 8.077      | 6.419 | 2.224 | 2.887  | 3.9E-03  | 0.01362201 | Igkv2-112     |
| ENSMUSG00000040428 | 200.013    | 6.404 | 0.544 | 11.773 | 5.4E-32  | 1.6395E-30 | Plekha4       |
| ENSMUSG00000111089 | 8.862      | 6.401 | 1.705 | 3.754  | 1.7E-04  | 0.00079589 | Gm49427       |
| ENSMUSG00000047462 | 7.922      | 6.398 | 1.603 | 3.992  | 6.6E-05  | 0.00032154 | Gpr141b       |
| ENSMUSG00000053338 | 14766.240  | 6.375 | 0.325 | 19.586 | 2.1E-85  | 2.7293E-83 | Tarm1         |
| ENSMUSG00000054905 | 10.728     | 6.357 | 1.513 | 4.200  | 2.7E-05  | 0.00013807 | Stfa3         |
| ENSMUSG00000104509 | 12.179     | 6.356 | 1.511 | 4.205  | 2.6E-05  | 0.00013537 | Gm33994       |
| ENSMUSG00000100529 | 9.092      | 6.318 | 1.641 | 3.849  | 1.2E-04  | 0.00055556 | Gm19261       |
| ENSMUSG00000087264 | 5.991      | 6.298 | 1.808 | 3.483  | 5.0E-04  | 0.00208101 | Gad1os        |
| ENSMUSG00000085135 | 22.887     | 6.295 | 1.154 | 5.455  | 4.9E-08  | 3.6346E-07 | Lrrc55os      |
| ENSMUSG00000015437 | 215.386    | 6.290 | 0.864 | 7.276  | 3.4E-13  | 4.0311E-12 | Gzmb          |
| ENSMUSG00000100392 | 46.186     | 6.283 | 0.961 | 6.536  | 6.3E-11  | 6.1397E-10 | Gm28935       |
| ENSMUSG00000110500 | 40.165     | 6.264 | 1.228 | 5.100  | 3.4E-07  | 2.2695E-06 | Gm32568       |
| ENSMUSG00000116763 | 7.008      | 6.255 | 1.956 | 3.197  | 1.4E-03  | 0.0053594  | Gm41492       |
| ENSMUSG00000095519 | 11.899     | 6.251 | 2.136 | 2.926  | 3.4E-03  | 0.01219083 | Ighv1-66      |
| ENSMUSG00000056755 | 4.886      | 6.189 | 1.971 | 3.139  | 1.7E-03  | 0.00642695 | Grm7          |
| ENSMUSG00000104998 | 4.081      | 6.166 | 1.958 | 3.150  | 1.6E-03  | 0.00621921 | Gm43822       |
| ENSMUSG00000025746 | 4672.347   | 6.149 | 0.358 | 17.156 | 5.6E-66  | 4.9721E-64 | Il6           |
| ENSMUSG00000022501 | 40.311     | 6.137 | 0.748 | 8.206  | 2.3E-16  | 3.3097E-15 | Prm1          |
| ENSMUSG00000038239 | 54.270     | 6.131 | 0.891 | 6.885  | 5.8E-12  | 6.1277E-11 | Hrc           |
| ENSMUSG00000050395 | 2708.819   | 6.131 | 0.656 | 9.343  | 9.4E-21  | 1.7653E-19 | Tnfsf15       |
| ENSMUSG00000055202 | 197.205    | 6.123 | 0.462 | 13.262 | 3.8E-40  | 1.5716E-38 | Zfp811        |
| ENSMUSG00000027219 | 15512.986  | 6.116 | 0.312 | 19.625 | 9.4E-86  | 1.2684E-83 | Slc28a2       |
| ENSMUSG00000085431 | 10.564     | 6.114 | 1.710 | 3.575  | 3.5E-04  | 0.0015137  | 4930440I19Rik |
| ENSMUSG00000024798 | 77.758     | 6.077 | 1.144 | 5.313  | 1.1E-07  | 7.6879E-07 | Htr7          |
| ENSMUSG00000031596 | 13680.935  | 6.046 | 0.277 | 21.814 | 1.7E-105 | 3.484E-103 | Slc7a2        |
| ENSMUSG00000114768 | 65.570     | 6.012 | 1.235 | 4.867  | 1.1E-06  | 7.074E-06  | Gm48857       |
| ENSMUSG00000055110 | 241.915    | 6.012 | 1.017 | 5.913  | 3.4E-09  | 2.8145E-08 | A630012P03Rik |
| ENSMUSG00000077713 | 4.812      | 6.012 | 1.794 | 3.351  | 8.0E-04  | 0.00324912 | Gm25728       |
| ENSMUSG00000050742 | 4.663      | 6.003 | 1.701 | 3.529  | 4.2E-04  | 0.00177789 | Olf1r164      |
| ENSMUSG00000038037 | 46802.771  | 5.984 | 0.289 | 20.715 | 2.6E-95  | 4.2176E-93 | Socs1         |
| ENSMUSG00000004948 | 7.512      | 5.976 | 1.752 | 3.412  | 6.5E-04  | 0.00264949 | Zp3           |
| ENSMUSG00000108695 | 7.047      | 5.944 | 1.544 | 3.851  | 1.2E-04  | 0.00055194 | Siglecl1      |
| ENSMUSG00000085398 | 3.924      | 5.939 | 1.688 | 3.519  | 4.3E-04  | 0.00183663 | 4931406G06Rik |
| ENSMUSG00000041782 | 711.256    | 5.938 | 0.642 | 9.247  | 2.3E-20  | 4.2638E-19 | Lad1          |
| ENSMUSG00000042985 | 57.143     | 5.937 | 0.948 | 6.260  | 3.9E-10  | 3.5372E-09 | Upk3b         |
| ENSMUSG00000036814 | 10.742     | 5.928 | 1.535 | 3.861  | 1.1E-04  | 0.00053088 | Slc6a20a      |
| ENSMUSG00000114553 | 46.487     | 5.928 | 0.716 | 8.282  | 1.2E-16  | 1.7837E-15 | Gm7644        |
| ENSMUSG00000074345 | 131.618    | 5.925 | 1.190 | 4.979  | 6.4E-07  | 4.1113E-06 | Tnfaip813     |
| ENSMUSG00000029700 | 3.061      | 5.924 | 2.385 | 2.484  | 1.3E-02  | 0.03943074 | Slc13a1       |
| ENSMUSG00000050866 | 10.947     | 5.907 | 1.829 | 3.230  | 1.2E-03  | 0.00482324 | Clrn3         |
| ENSMUSG00000020641 | 315111.756 | 5.895 | 0.674 | 8.750  | 2.1E-18  | 3.5333E-17 | Rsad2         |
| ENSMUSG00000102600 | 2.642      | 5.879 | 2.281 | 2.578  | 9.9E-03  | 0.03106334 | Gm37266       |
| ENSMUSG00000091272 | 4.473      | 5.869 | 1.968 | 2.982  | 2.9E-03  | 0.01035047 | Gm17641       |
| ENSMUSG00000012428 | 329.272    | 5.852 | 1.226 | 4.774  | 1.8E-06  | 1.1042E-05 | Steap4        |
| ENSMUSG00000096992 | 12.479     | 5.820 | 1.290 | 4.512  | 6.4E-06  | 3.6589E-05 | Gm26788       |
| ENSMUSG00000117439 | 6.375      | 5.802 | 1.482 | 3.914  | 9.1E-05  | 0.000433   | Gm50083       |
| ENSMUSG00000116038 | 6.197      | 5.802 | 1.587 | 3.655  | 2.6E-04  | 0.0011396  | Gm46563       |
| ENSMUSG00000070501 | 1066.077   | 5.801 | 0.495 | 11.722 | 9.8E-32  | 2.9532E-30 | Ifi214        |

|                    |            |       |       |        |          |            |               |
|--------------------|------------|-------|-------|--------|----------|------------|---------------|
| ENSMUSG00000118633 | 2.811      | 5.801 | 1.874 | 3.095  | 2.0E-03  | 0.0073654  | Gm21104       |
| ENSMUSG00000049583 | 22.758     | 5.784 | 1.283 | 4.510  | 6.5E-06  | 3.7004E-05 | Grm5          |
| ENSMUSG00000046031 | 21217.947  | 5.782 | 0.444 | 13.023 | 9.0E-39  | 3.5526E-37 | Calhm6        |
| ENSMUSG00000051648 | 13.565     | 5.754 | 1.531 | 3.759  | 1.7E-04  | 0.00078224 | Kctd19        |
| ENSMUSG00000039304 | 4297.681   | 5.753 | 0.579 | 9.934  | 3.0E-23  | 6.3197E-22 | Tnfsf10       |
| ENSMUSG00000037708 | 4.637      | 5.750 | 2.287 | 2.515  | 1.2E-02  | 0.0365422  | Spag6         |
| ENSMUSG00000075330 | 16.894     | 5.742 | 1.260 | 4.558  | 5.2E-06  | 2.9783E-05 | A930003A15Rik |
| ENSMUSG00000009093 | 71.077     | 5.739 | 0.689 | 8.334  | 7.8E-17  | 1.17E-15   | Gstt4         |
| ENSMUSG00000106609 | 100.585    | 5.716 | 0.521 | 10.974 | 5.1E-28  | 1.3225E-26 | Gm43181       |
| ENSMUSG00000027399 | 10706.896  | 5.698 | 0.173 | 32.990 | 1.1E-238 | 1.816E-235 | Il1a          |
| ENSMUSG00000055602 | 21.220     | 5.692 | 1.175 | 4.843  | 1.3E-06  | 7.9661E-06 | Tcp10b        |
| ENSMUSG00000025165 | 132.247    | 5.687 | 1.101 | 5.168  | 2.4E-07  | 1.6123E-06 | Sectm1a       |
| ENSMUSG00000021872 | 54.037     | 5.681 | 1.534 | 3.704  | 2.1E-04  | 0.00095578 | Rnase10       |
| ENSMUSG00000103588 | 149.247    | 5.680 | 0.632 | 8.991  | 2.5E-19  | 4.3078E-18 | Gm18445       |
| ENSMUSG00000020638 | 192878.926 | 5.679 | 0.615 | 9.241  | 2.4E-20  | 4.5095E-19 | Cmpk2         |
| ENSMUSG00000035186 | 409.746    | 5.679 | 0.327 | 17.346 | 2.1E-67  | 1.941E-65  | Ubd           |
| ENSMUSG00000054072 | 32566.336  | 5.666 | 0.693 | 8.172  | 3.0E-16  | 4.3709E-15 | Iigp1         |
| ENSMUSG00000040046 | 25.649     | 5.660 | 1.629 | 3.475  | 5.1E-04  | 0.00213881 | Tph1          |
| ENSMUSG00000107075 | 6.257      | 5.657 | 1.923 | 2.941  | 3.3E-03  | 0.01167038 | Gm43068       |
| ENSMUSG00000114185 | 26.672     | 5.647 | 1.120 | 5.042  | 4.6E-07  | 3.0147E-06 | Gm47662       |
| ENSMUSG00000027347 | 1785.318   | 5.638 | 0.250 | 22.563 | 1.0E-112 | 2.4E-110   | Rasgrp1       |
| ENSMUSG00000041165 | 3.688      | 5.636 | 1.997 | 2.822  | 4.8E-03  | 0.01638188 | Spem1         |
| ENSMUSG00000035849 | 56.695     | 5.627 | 1.334 | 4.217  | 2.5E-05  | 0.00012895 | Krt222        |
| ENSMUSG00000028268 | 25566.696  | 5.625 | 0.515 | 10.921 | 9.1E-28  | 2.3511E-26 | Gbp3          |
| ENSMUSG00000017652 | 48595.262  | 5.614 | 0.381 | 14.730 | 4.1E-49  | 2.2088E-47 | Cd40          |
| ENSMUSG00000078921 | 15900.348  | 5.579 | 0.579 | 9.633  | 5.8E-22  | 1.1616E-20 | Tgtp2         |
| ENSMUSG00000103676 | 5.908      | 5.568 | 1.621 | 3.435  | 5.9E-04  | 0.00245199 | Gm38204       |
| ENSMUSG00000032845 | 88.735     | 5.566 | 0.836 | 6.655  | 2.8E-11  | 2.8478E-10 | Alpk2         |
| ENSMUSG00000039236 | 16515.714  | 5.526 | 0.421 | 13.121 | 2.5E-39  | 9.953E-38  | Isg20         |
| ENSMUSG00000025790 | 11523.182  | 5.515 | 0.196 | 28.075 | 2.0E-173 | 1.441E-170 | Slco3a1       |
| ENSMUSG00000035818 | 10.210     | 5.506 | 2.030 | 2.712  | 6.7E-03  | 0.02204416 | Plekhs1       |
| ENSMUSG00000031289 | 8.878      | 5.501 | 1.582 | 3.478  | 5.1E-04  | 0.00211513 | Il13ra2       |
| ENSMUSG00000045502 | 7442.790   | 5.492 | 0.184 | 29.823 | 2.0E-195 | 1.751E-192 | Hcar2         |
| ENSMUSG00000040328 | 648.698    | 5.475 | 0.690 | 7.935  | 2.1E-15  | 2.8448E-14 | Olfr56        |
| ENSMUSG00000035352 | 15474.095  | 5.469 | 0.510 | 10.723 | 7.9E-27  | 1.943E-25  | Ccl12         |
| ENSMUSG00000030889 | 3.627      | 5.469 | 2.004 | 2.729  | 6.4E-03  | 0.02106817 | Vwa3a         |
| ENSMUSG00000035560 | 9.942      | 5.457 | 1.418 | 3.850  | 1.2E-04  | 0.00055485 | Wdr20rt       |
| ENSMUSG00000029410 | 37.143     | 5.447 | 0.976 | 5.584  | 2.4E-08  | 1.8081E-07 | Ppef2         |
| ENSMUSG00000103336 | 3.936      | 5.433 | 1.865 | 2.913  | 3.6E-03  | 0.01262186 | Gm37993       |
| ENSMUSG00000031551 | 158.577    | 5.427 | 0.854 | 6.353  | 2.1E-10  | 1.9798E-09 | Ido1          |
| ENSMUSG00000109447 | 4.555      | 5.423 | 1.737 | 3.123  | 1.8E-03  | 0.00676254 | Gm3198        |
| ENSMUSG00000097754 | 223.636    | 5.420 | 0.408 | 13.282 | 2.9E-40  | 1.205E-38  | Ptgs2os2      |
| ENSMUSG00000041481 | 3787.248   | 5.418 | 0.199 | 27.163 | 1.8E-162 | 1.118E-159 | Serpina3g     |
| ENSMUSG00000067049 | 40.597     | 5.409 | 0.685 | 7.901  | 2.8E-15  | 3.7252E-14 | Unc93a        |
| ENSMUSG00000108006 | 99.972     | 5.406 | 0.662 | 8.170  | 3.1E-16  | 4.4569E-15 | Gm44418       |
| ENSMUSG00000026875 | 14127.656  | 5.404 | 0.166 | 32.558 | 1.6E-232 | 2.265E-229 | Traf1         |
| ENSMUSG00000050105 | 10.425     | 5.398 | 2.121 | 2.545  | 1.1E-02  | 0.03381149 | Grrp1         |
| ENSMUSG00000071036 | 15.454     | 5.398 | 1.827 | 2.954  | 3.1E-03  | 0.01124734 | Gm10309       |
| ENSMUSG00000114650 | 5.230      | 5.361 | 1.752 | 3.059  | 2.2E-03  | 0.00821694 | Gm47570       |
| ENSMUSG00000048852 | 1070.721   | 5.356 | 0.765 | 6.998  | 2.6E-12  | 2.8514E-11 | Gm12185       |
| ENSMUSG00000118495 | 63.201     | 5.320 | 0.769 | 6.918  | 4.6E-12  | 4.8911E-11 | Gm21011       |
| ENSMUSG00000108956 | 4.039      | 5.314 | 2.044 | 2.600  | 9.3E-03  | 0.02936839 | Gm45179       |

|                    |            |       |       |        |          |            |               |
|--------------------|------------|-------|-------|--------|----------|------------|---------------|
| ENSMUSG00000036067 | 24094.981  | 5.307 | 0.273 | 19.449 | 3.0E-84  | 3.7575E-82 | Slc2a6        |
| ENSMUSG00000112798 | 40.402     | 5.307 | 0.716 | 7.416  | 1.2E-13  | 1.4662E-12 | Gm40685       |
| ENSMUSG00000042961 | 19.060     | 5.291 | 1.281 | 4.130  | 3.6E-05  | 0.00018432 | Egflam        |
| ENSMUSG00000095612 | 22.161     | 5.286 | 1.956 | 2.702  | 6.9E-03  | 0.0226253  | Ighv5-4       |
| ENSMUSG00000044703 | 7031.353   | 5.279 | 0.543 | 9.728  | 2.3E-22  | 4.6483E-21 | Phf11a        |
| ENSMUSG00000030606 | 7.548      | 5.272 | 2.027 | 2.602  | 9.3E-03  | 0.02927407 | Hapln3        |
| ENSMUSG00000035594 | 11.095     | 5.267 | 1.685 | 3.127  | 1.8E-03  | 0.00667825 | Chrna5        |
| ENSMUSG00000104713 | 2483.291   | 5.265 | 0.599 | 8.784  | 1.6E-18  | 2.6313E-17 | Gbp6          |
| ENSMUSG00000076633 | 2.806      | 5.257 | 2.170 | 2.423  | 1.5E-02  | 0.0457481  | Ighv5-2       |
| ENSMUSG00000039899 | 20138.513  | 5.253 | 0.331 | 15.870 | 1.0E-56  | 6.9197E-55 | Fgl2          |
| ENSMUSG00000114859 | 18.076     | 5.241 | 1.265 | 4.142  | 3.4E-05  | 0.00017547 | Gm47735       |
| ENSMUSG00000041827 | 156057.780 | 5.237 | 0.612 | 8.563  | 1.1E-17  | 1.7441E-16 | Oas11         |
| ENSMUSG00000053113 | 57738.830  | 5.228 | 0.149 | 35.021 | 1.1E-268 | 5.139E-265 | Socs3         |
| ENSMUSG00000032068 | 33.175     | 5.223 | 1.081 | 4.829  | 1.4E-06  | 8.4778E-06 | Plet1         |
| ENSMUSG00000071562 | 28.740     | 5.207 | 0.878 | 5.929  | 3.0E-09  | 2.5627E-08 | Stfa1         |
| ENSMUSG00000097742 | 6.304      | 5.197 | 1.726 | 3.011  | 2.6E-03  | 0.00949889 | Gm26535       |
| ENSMUSG00000022900 | 99.685     | 5.182 | 0.667 | 7.766  | 8.1E-15  | 1.0511E-13 | Ildr1         |
| ENSMUSG00000026770 | 497.248    | 5.177 | 0.529 | 9.784  | 1.3E-22  | 2.7281E-21 | Il2ra         |
| ENSMUSG00000066677 | 9831.183   | 5.155 | 0.657 | 7.845  | 4.3E-15  | 5.7538E-14 | Ifi208        |
| ENSMUSG00000110114 | 2.818      | 5.152 | 1.998 | 2.579  | 9.9E-03  | 0.0310282  | Gm45471       |
| ENSMUSG00000116583 | 5.217      | 5.140 | 1.605 | 3.203  | 1.4E-03  | 0.00526026 | Gm2349        |
| ENSMUSG00000114163 | 39.510     | 5.140 | 0.790 | 6.506  | 7.7E-11  | 7.4516E-10 | Gm32296       |
| ENSMUSG00000113228 | 5.196      | 5.139 | 1.568 | 3.277  | 1.0E-03  | 0.00413991 | 4930471E15Rik |
| ENSMUSG00000068417 | 756.624    | 5.125 | 0.292 | 17.570 | 4.2E-69  | 3.9757E-67 | Pnp2          |
| ENSMUSG00000026981 | 222202.315 | 5.117 | 0.177 | 28.831 | 8.7E-183 | 6.981E-180 | Il1rn         |
| ENSMUSG00000085786 | 372.453    | 5.107 | 0.306 | 16.709 | 1.1E-62  | 8.9423E-61 | Gm15987       |
| ENSMUSG00000043613 | 43.998     | 5.098 | 1.765 | 2.889  | 3.9E-03  | 0.01354339 | Mmp3          |
| ENSMUSG00000092021 | 136.837    | 5.061 | 1.266 | 3.997  | 6.4E-05  | 0.0003151  | Gbp11         |
| ENSMUSG00000030149 | 1532.458   | 5.060 | 0.443 | 11.427 | 3.1E-30  | 8.7487E-29 | Klrk1         |
| ENSMUSG00000090957 | 330.740    | 5.054 | 0.393 | 12.856 | 8.0E-38  | 3.0353E-36 | Gm7535        |
| ENSMUSG00000102282 | 4.842      | 5.051 | 2.108 | 2.396  | 1.7E-02  | 0.0487435  | A930032L01Rik |
| ENSMUSG00000073407 | 14.610     | 5.048 | 0.991 | 5.095  | 3.5E-07  | 2.3174E-06 | Gm6034        |
| ENSMUSG00000031382 | 5.679      | 5.037 | 2.091 | 2.409  | 1.6E-02  | 0.04726917 | Asb11         |
| ENSMUSG00000002384 | 4.288      | 5.013 | 1.994 | 2.514  | 1.2E-02  | 0.036649   | Bmp8b         |
| ENSMUSG00000047884 | 39.515     | 5.011 | 0.711 | 7.050  | 1.8E-12  | 1.9817E-11 | Klk9          |
| ENSMUSG00000024211 | 7.128      | 4.999 | 1.887 | 2.649  | 8.1E-03  | 0.02599916 | Grm8          |
| ENSMUSG00000090231 | 629.263    | 4.989 | 0.237 | 21.049 | 2.3E-98  | 4.0048E-96 | Cfb           |
| ENSMUSG00000034459 | 128404.601 | 4.988 | 0.590 | 8.448  | 3.0E-17  | 4.5598E-16 | Ifit1         |
| ENSMUSG00000020891 | 6.807      | 4.988 | 1.849 | 2.697  | 7.0E-03  | 0.02293333 | Alox8         |
| ENSMUSG00000085977 | 767.138    | 4.986 | 0.471 | 10.597 | 3.1E-26  | 7.4406E-25 | Gm5970        |
| ENSMUSG00000024675 | 44824.153  | 4.965 | 0.449 | 11.056 | 2.0E-28  | 5.3834E-27 | Ms4a4c        |
| ENSMUSG00000113101 | 3.419      | 4.953 | 1.978 | 2.504  | 1.2E-02  | 0.0374824  | Gm33424       |
| ENSMUSG00000023206 | 6403.337   | 4.944 | 0.300 | 16.455 | 7.8E-61  | 5.8831E-59 | Il15ra        |
| ENSMUSG00000113608 | 5.315      | 4.923 | 1.461 | 3.370  | 7.5E-04  | 0.00304626 | Gm48715       |
| ENSMUSG00000036117 | 15.259     | 4.909 | 1.297 | 3.784  | 1.5E-04  | 0.00071319 | Il5           |
| ENSMUSG00000092509 | 2.995      | 4.905 | 1.900 | 2.581  | 9.8E-03  | 0.03080752 | Gm20394       |
| ENSMUSG00000050370 | 4193.042   | 4.891 | 0.294 | 16.628 | 4.4E-62  | 3.4214E-60 | Ch25h         |
| ENSMUSG00000068246 | 1849.980   | 4.889 | 0.445 | 10.991 | 4.2E-28  | 1.1048E-26 | Apol9b        |
| ENSMUSG00000050234 | 32.910     | 4.888 | 1.192 | 4.101  | 4.1E-05  | 0.00020782 | Gja4          |
| ENSMUSG00000025496 | 25.488     | 4.886 | 1.301 | 3.755  | 1.7E-04  | 0.00079316 | Drd4          |
| ENSMUSG00000102099 | 15.581     | 4.885 | 1.379 | 3.543  | 4.0E-04  | 0.0016958  | 1700011B04Rik |
| ENSMUSG00000090942 | 1813.630   | 4.870 | 0.705 | 6.904  | 5.1E-12  | 5.3966E-11 | F830016B08Rik |

|                    |            |       |       |        |          |            |               |
|--------------------|------------|-------|-------|--------|----------|------------|---------------|
| ENSMUSG0000000386  | 37834.820  | 4.864 | 0.494 | 9.840  | 7.5E-23  | 1.5796E-21 | Mx1           |
| ENSMUSG00000090223 | 4.272      | 4.849 | 1.617 | 2.998  | 2.7E-03  | 0.00987951 | Pcp4          |
| ENSMUSG00000093726 | 9.246      | 4.843 | 1.358 | 3.567  | 3.6E-04  | 0.00155402 | Gm20667       |
| ENSMUSG00000031549 | 169.333    | 4.835 | 0.561 | 8.613  | 7.1E-18  | 1.1401E-16 | Ido2          |
| ENSMUSG00000052749 | 3148.408   | 4.829 | 0.372 | 12.968 | 1.8E-38  | 7.182E-37  | Trim30b       |
| ENSMUSG00000043953 | 28070.730  | 4.829 | 0.307 | 15.739 | 8.2E-56  | 5.3394E-54 | Ccrl2         |
| ENSMUSG00000071311 | 495.055    | 4.824 | 0.248 | 19.478 | 1.7E-84  | 2.1576E-82 | Gpr31b        |
| ENSMUSG00000030142 | 73012.405  | 4.815 | 0.181 | 26.665 | 1.2E-156 | 7.137E-154 | Clec4e        |
| ENSMUSG00000003863 | 830.932    | 4.814 | 0.302 | 15.918 | 4.7E-57  | 3.2661E-55 | Ppfa3         |
| ENSMUSG00000117234 | 70.864     | 4.813 | 0.607 | 7.930  | 2.2E-15  | 2.9729E-14 | Gm7818        |
| ENSMUSG00000040253 | 18775.173  | 4.809 | 0.470 | 10.224 | 1.5E-24  | 3.4761E-23 | Gbp7          |
| ENSMUSG00000026011 | 6.293      | 4.808 | 1.984 | 2.424  | 1.5E-02  | 0.04567296 | Ctla4         |
| ENSMUSG00000051716 | 33.819     | 4.786 | 1.146 | 4.177  | 3.0E-05  | 0.00015183 | Apon          |
| ENSMUSG00000097766 | 10.742     | 4.775 | 1.607 | 2.971  | 3.0E-03  | 0.01070432 | 5730420D15Rik |
| ENSMUSG00000045326 | 328.385    | 4.759 | 0.380 | 12.533 | 4.9E-36  | 1.7553E-34 | Fndc7         |
| ENSMUSG00000044313 | 83.530     | 4.751 | 1.107 | 4.290  | 1.8E-05  | 9.5043E-05 | Mab2113       |
| ENSMUSG00000057465 | 286.506    | 4.749 | 0.331 | 14.344 | 1.2E-46  | 5.7983E-45 | Saa2          |
| ENSMUSG00000045932 | 123261.929 | 4.747 | 0.664 | 7.151  | 8.6E-13  | 9.7338E-12 | Ifit2         |
| ENSMUSG00000045551 | 33695.451  | 4.741 | 0.195 | 24.302 | 1.9E-130 | 6.655E-128 | Fpr1          |
| ENSMUSG00000028602 | 661.882    | 4.712 | 0.228 | 20.672 | 6.1E-95  | 9.9731E-93 | Tnfrsf8       |
| ENSMUSG00000108493 | 7.340      | 4.709 | 1.644 | 2.865  | 4.2E-03  | 0.01451273 | Gm45715       |
| ENSMUSG00000052270 | 3193.188   | 4.700 | 0.172 | 27.394 | 3.3E-165 | 2.247E-162 | Fpr2          |
| ENSMUSG00000029184 | 2.970      | 4.695 | 1.941 | 2.419  | 1.6E-02  | 0.04613373 | Olfrl109      |
| ENSMUSG00000004296 | 1829.244   | 4.690 | 0.381 | 12.293 | 9.8E-35  | 3.3527E-33 | Il12b         |
| ENSMUSG00000044103 | 6712.779   | 4.669 | 0.218 | 21.384 | 1.9E-101 | 3.563E-99  | Il1f9         |
| ENSMUSG00000057346 | 1040.531   | 4.666 | 0.279 | 16.725 | 8.6E-63  | 6.9282E-61 | Apol9a        |
| ENSMUSG00000033427 | 20.161     | 4.663 | 1.154 | 4.042  | 5.3E-05  | 0.00026379 | Upb1          |
| ENSMUSG00000085652 | 6.789      | 4.655 | 1.621 | 2.872  | 4.1E-03  | 0.01422214 | Gm11999       |
| ENSMUSG00000068129 | 3436.641   | 4.651 | 0.203 | 22.881 | 7.1E-116 | 1.859E-113 | Cst7          |
| ENSMUSG00000118183 | 19.411     | 4.647 | 1.486 | 3.127  | 1.8E-03  | 0.00666959 | Gm50345       |
| ENSMUSG00000057135 | 3432.376   | 4.647 | 0.215 | 21.581 | 2.7E-103 | 5.235E-101 | Scimp         |
| ENSMUSG00000078616 | 6547.785   | 4.646 | 0.504 | 9.217  | 3.0E-20  | 5.561E-19  | Trim30c       |
| ENSMUSG00000087452 | 11.315     | 4.638 | 1.295 | 3.582  | 3.4E-04  | 0.00148034 | Gm11998       |
| ENSMUSG00000043145 | 4.667      | 4.626 | 1.671 | 2.769  | 5.6E-03  | 0.01890932 | Gm11292       |
| ENSMUSG00000027611 | 16356.862  | 4.619 | 0.178 | 26.009 | 4.0E-149 | 1.797E-146 | Procr         |
| ENSMUSG00000086526 | 4.320      | 4.617 | 1.577 | 2.928  | 3.4E-03  | 0.01214054 | Gm12762       |
| ENSMUSG00000079177 | 4.437      | 4.593 | 1.790 | 2.566  | 1.0E-02  | 0.03199637 | Fam228a       |
| ENSMUSG00000089844 | 453.689    | 4.584 | 0.300 | 15.288 | 9.2E-53  | 5.5326E-51 | A530032D15Rik |
| ENSMUSG00000081933 | 3.428      | 4.583 | 1.864 | 2.458  | 1.4E-02  | 0.04196651 | Gm14767       |
| ENSMUSG00000020178 | 4640.168   | 4.578 | 0.240 | 19.079 | 3.8E-81  | 4.4961E-79 | Adora2a       |
| ENSMUSG00000107946 | 28.828     | 4.572 | 1.064 | 4.295  | 1.7E-05  | 9.3137E-05 | Gm44066       |
| ENSMUSG00000099568 | 3.520      | 4.569 | 1.872 | 2.440  | 1.5E-02  | 0.04381912 | Gm28513       |
| ENSMUSG00000091649 | 21763.639  | 4.561 | 0.430 | 10.599 | 3.0E-26  | 7.2568E-25 | Phfl1b        |
| ENSMUSG00000029378 | 47.739     | 4.551 | 1.055 | 4.314  | 1.6E-05  | 8.6212E-05 | Areg          |
| ENSMUSG00000086184 | 37.561     | 4.543 | 0.733 | 6.202  | 5.6E-10  | 5.0173E-09 | Gm12764       |
| ENSMUSG00000037849 | 26853.697  | 4.527 | 0.575 | 7.872  | 3.5E-15  | 4.6703E-14 | Ifi206        |
| ENSMUSG00000095704 | 38.998     | 4.527 | 0.882 | 5.135  | 2.8E-07  | 1.9055E-06 | Gm8221        |
| ENSMUSG00000001156 | 41858.818  | 4.514 | 0.193 | 23.354 | 1.2E-120 | 3.598E-118 | Mxd1          |
| ENSMUSG00000090103 | 36.649     | 4.513 | 0.639 | 7.057  | 1.7E-12  | 1.8828E-11 | Gm16094       |
| ENSMUSG00000033538 | 8631.210   | 4.501 | 0.212 | 21.207 | 8.3E-100 | 1.4895E-97 | Casp4         |
| ENSMUSG00000112892 | 4.275      | 4.495 | 1.586 | 2.834  | 4.6E-03  | 0.01583182 | Gm8613        |
| ENSMUSG00000116961 | 34.813     | 4.487 | 0.625 | 7.182  | 6.9E-13  | 7.8564E-12 | Gm49662       |

|                    |            |       |       |        |          |            |          |
|--------------------|------------|-------|-------|--------|----------|------------|----------|
| ENSMUSG00000073234 | 30.159     | 4.483 | 1.108 | 4.046  | 5.2E-05  | 0.00025947 | Gm8773   |
| ENSMUSG00000035692 | 55225.882  | 4.477 | 0.552 | 8.105  | 5.3E-16  | 7.4568E-15 | Isg15    |
| ENSMUSG00000115855 | 262.381    | 4.463 | 0.366 | 12.180 | 4.0E-34  | 1.3271E-32 | Gm34643  |
| ENSMUSG00000058287 | 7.494      | 4.462 | 1.693 | 2.636  | 8.4E-03  | 0.02688623 | Gm12253  |
| ENSMUSG00000016529 | 3854.271   | 4.455 | 0.392 | 11.365 | 6.3E-30  | 1.7696E-28 | Il10     |
| ENSMUSG00000114963 | 10.364     | 4.452 | 1.318 | 3.378  | 7.3E-04  | 0.00297008 | Gm29010  |
| ENSMUSG00000098934 | 57.917     | 4.448 | 0.468 | 9.515  | 1.8E-21  | 3.5625E-20 | Gvin-ps4 |
| ENSMUSG00000111118 | 867.024    | 4.446 | 0.631 | 7.045  | 1.9E-12  | 2.0468E-11 | Gm6545   |
| ENSMUSG00000019230 | 6.814      | 4.442 | 1.523 | 2.916  | 3.5E-03  | 0.01252541 | Lhx9     |
| ENSMUSG00000053541 | 57.270     | 4.437 | 0.750 | 5.913  | 3.4E-09  | 2.8173E-08 | Gvin-ps6 |
| ENSMUSG00000107480 | 243.334    | 4.432 | 0.444 | 9.979  | 1.9E-23  | 4.0609E-22 | Gm44165  |
| ENSMUSG00000118068 | 5.694      | 4.425 | 1.642 | 2.695  | 7.0E-03  | 0.02303146 | Gm50275  |
| ENSMUSG00000030107 | 42054.619  | 4.416 | 0.520 | 8.485  | 2.2E-17  | 3.3618E-16 | Usp18    |
| ENSMUSG00000023341 | 6743.067   | 4.416 | 0.412 | 10.721 | 8.1E-27  | 1.9951E-25 | Mx2      |
| ENSMUSG00000029490 | 2452.907   | 4.405 | 0.177 | 24.948 | 2.3E-137 | 9.085E-135 | Mfsd7a   |
| ENSMUSG00000103165 | 56.284     | 4.404 | 0.709 | 6.213  | 5.2E-10  | 4.671E-09  | Gm37560  |
| ENSMUSG00000118038 | 179.286    | 4.400 | 0.405 | 10.876 | 1.5E-27  | 3.8254E-26 | Gm9895   |
| ENSMUSG00000079700 | 4.779      | 4.364 | 1.742 | 2.505  | 1.2E-02  | 0.03738615 | Fpr3     |
| ENSMUSG00000100108 | 12.375     | 4.348 | 1.384 | 3.142  | 1.7E-03  | 0.00637727 | Gm28100  |
| ENSMUSG00000040264 | 37.074     | 4.345 | 0.937 | 4.636  | 3.5E-06  | 2.0916E-05 | Gbp2b    |
| ENSMUSG00000030472 | 40.119     | 4.345 | 0.684 | 6.347  | 2.2E-10  | 2.0535E-09 | Ceacam18 |
| ENSMUSG00000023078 | 28.143     | 4.335 | 0.985 | 4.399  | 1.1E-05  | 5.9866E-05 | Cxcl13   |
| ENSMUSG00000016283 | 516.913    | 4.334 | 0.482 | 8.985  | 2.6E-19  | 4.5192E-18 | H2-M2    |
| ENSMUSG00000018930 | 118948.120 | 4.333 | 0.207 | 20.910 | 4.4E-97  | 7.334E-95  | Ccl4     |
| ENSMUSG00000050350 | 730.144    | 4.332 | 0.278 | 15.582 | 9.6E-55  | 6.1363E-53 | Gpr18    |
| ENSMUSG00000090138 | 2.991      | 4.331 | 1.567 | 2.765  | 5.7E-03  | 0.01914612 | Gm3687   |
| ENSMUSG00000034842 | 111.028    | 4.331 | 0.605 | 7.163  | 7.9E-13  | 8.9791E-12 | Art3     |
| ENSMUSG00000025591 | 10447.231  | 4.330 | 0.117 | 36.932 | 1.4E-298 | 1.134E-294 | Tma16    |
| ENSMUSG00000079597 | 69.567     | 4.329 | 0.545 | 7.947  | 1.9E-15  | 2.5985E-14 | Cstdc4   |
| ENSMUSG00000118590 | 15.215     | 4.326 | 0.811 | 5.335  | 9.6E-08  | 6.8464E-07 | Gm15433  |
| ENSMUSG00000039699 | 5527.457   | 4.322 | 0.338 | 12.777 | 2.2E-37  | 8.2647E-36 | Batf2    |
| ENSMUSG00000016496 | 18815.355  | 4.303 | 0.261 | 16.470 | 6.0E-61  | 4.5956E-59 | Cd274    |
| ENSMUSG00000033847 | 147.680    | 4.300 | 0.455 | 9.454  | 3.3E-21  | 6.2858E-20 | Pla2g4c  |
| ENSMUSG00000006818 | 92191.960  | 4.294 | 0.138 | 31.209 | 8.0E-214 | 8.792E-211 | Sod2     |
| ENSMUSG00000031779 | 626.001    | 4.292 | 0.653 | 6.576  | 4.8E-11  | 4.7421E-10 | Ccl22    |
| ENSMUSG00000094027 | 12.014     | 4.291 | 1.052 | 4.080  | 4.5E-05  | 0.000226   | Gm21762  |
| ENSMUSG00000081169 | 22.763     | 4.287 | 0.939 | 4.565  | 5.0E-06  | 2.8755E-05 | Gm12551  |
| ENSMUSG00000068735 | 1838.956   | 4.282 | 0.327 | 13.082 | 4.2E-39  | 1.6554E-37 | Trp53i11 |
| ENSMUSG00000030402 | 167.217    | 4.281 | 0.482 | 8.889  | 6.2E-19  | 1.0554E-17 | Ppm1n    |
| ENSMUSG00000028037 | 14998.641  | 4.275 | 0.603 | 7.085  | 1.4E-12  | 1.5532E-11 | Ifi44    |
| ENSMUSG00000098534 | 49.567     | 4.275 | 0.569 | 7.518  | 5.6E-14  | 6.9091E-13 | Gm27167  |
| ENSMUSG00000006930 | 387.740    | 4.274 | 0.446 | 9.573  | 1.0E-21  | 2.0491E-20 | Hap1     |
| ENSMUSG00000063234 | 4369.345   | 4.264 | 0.189 | 22.562 | 1.0E-112 | 2.458E-110 | Gpr84    |
| ENSMUSG00000085161 | 19.470     | 4.261 | 0.898 | 4.745  | 2.1E-06  | 1.2654E-05 | Gm7580   |
| ENSMUSG00000035852 | 392.596    | 4.252 | 0.750 | 5.669  | 1.4E-08  | 1.1272E-07 | Misp     |
| ENSMUSG00000045662 | 21.078     | 4.246 | 1.018 | 4.173  | 3.0E-05  | 0.00015444 | Henmt1   |
| ENSMUSG00000101279 | 66.059     | 4.244 | 0.503 | 8.440  | 3.2E-17  | 4.8789E-16 | Gm18342  |
| ENSMUSG00000027555 | 10808.256  | 4.242 | 0.188 | 22.611 | 3.4E-113 | 8.35E-111  | Car13    |
| ENSMUSG00000023961 | 4302.083   | 4.226 | 0.180 | 23.413 | 3.2E-121 | 9.6E-119   | Enpp4    |
| ENSMUSG00000049928 | 11.567     | 4.225 | 1.094 | 3.861  | 1.1E-04  | 0.00053146 | Glp2r    |
| ENSMUSG00000027368 | 8071.557   | 4.225 | 0.185 | 22.812 | 3.4E-115 | 8.816E-113 | Dusp2    |
| ENSMUSG00000025321 | 102.191    | 4.215 | 0.571 | 7.382  | 1.6E-13  | 1.8779E-12 | Itgb8    |

|                    |            |       |       |        |          |            |               |
|--------------------|------------|-------|-------|--------|----------|------------|---------------|
| ENSMUSG00000118607 | 25.273     | 4.210 | 0.787 | 5.348  | 8.9E-08  | 6.375E-07  | Gm7592        |
| ENSMUSG00000067206 | 28.861     | 4.206 | 0.940 | 4.474  | 7.7E-06  | 4.3377E-05 | Lrrc66        |
| ENSMUSG00000072109 | 1228.163   | 4.204 | 0.230 | 18.258 | 1.8E-74  | 1.8865E-72 | A530040E14Rik |
| ENSMUSG00000040026 | 387002.540 | 4.198 | 0.110 | 38.242 | 0.0E+00  | 0          | Saa3          |
| ENSMUSG00000032446 | 12.112     | 4.178 | 1.738 | 2.403  | 1.6E-02  | 0.04791728 | Eomes         |
| ENSMUSG00000027360 | 8789.539   | 4.176 | 0.120 | 34.722 | 3.7E-264 | 1.266E-260 | Hdc           |
| ENSMUSG00000086389 | 22.622     | 4.175 | 1.031 | 4.051  | 5.1E-05  | 0.000254   | Gm15998       |
| ENSMUSG00000096175 | 3.224      | 4.174 | 1.549 | 2.694  | 7.1E-03  | 0.02308341 | Gm21761       |
| ENSMUSG00000026581 | 5589.141   | 4.173 | 0.163 | 25.653 | 3.9E-145 | 1.712E-142 | Sell          |
| ENSMUSG00000097028 | 47.782     | 4.172 | 0.706 | 5.912  | 3.4E-09  | 2.8321E-08 | Ptgs2os       |
| ENSMUSG00000078954 | 28.454     | 4.167 | 1.047 | 3.980  | 6.9E-05  | 0.00033637 | Arhgap8       |
| ENSMUSG00000018796 | 16284.719  | 4.159 | 0.161 | 25.853 | 2.3E-147 | 1.008E-144 | Acs11         |
| ENSMUSG00000030474 | 2268.226   | 4.158 | 0.165 | 25.231 | 1.8E-140 | 7.473E-138 | Siglece       |
| ENSMUSG00000026829 | 605.365    | 4.156 | 0.229 | 18.174 | 8.3E-74  | 8.5666E-72 | Gbgt1         |
| ENSMUSG00000029005 | 47.674     | 4.154 | 1.363 | 3.048  | 2.3E-03  | 0.00850725 | Draxin        |
| ENSMUSG00000104654 | 137.145    | 4.135 | 0.475 | 8.713  | 3.0E-18  | 4.8454E-17 | Gm43814       |
| ENSMUSG00000063430 | 32.664     | 4.134 | 0.849 | 4.868  | 1.1E-06  | 7.0393E-06 | Wscd2         |
| ENSMUSG00000113290 | 20.663     | 4.130 | 0.970 | 4.259  | 2.1E-05  | 0.00010837 | A530058O07Rik |
| ENSMUSG00000109729 | 20.631     | 4.126 | 0.710 | 5.814  | 6.1E-09  | 4.9858E-08 | Gm45418       |
| ENSMUSG00000073631 | 26.960     | 4.121 | 0.662 | 6.221  | 4.9E-10  | 4.4458E-09 | Gm10553       |
| ENSMUSG00000111774 | 3.440      | 4.111 | 1.718 | 2.393  | 1.7E-02  | 0.04917243 | Gm38398       |
| ENSMUSG00000084846 | 147.964    | 4.103 | 0.522 | 7.866  | 3.7E-15  | 4.9187E-14 | A730011C13Rik |
| ENSMUSG00000094796 | 3008.586   | 4.103 | 0.543 | 7.554  | 4.2E-14  | 5.2667E-13 | BC147527      |
| ENSMUSG00000025481 | 40.998     | 4.101 | 0.602 | 6.814  | 9.5E-12  | 9.8944E-11 | Urah          |
| ENSMUSG00000087281 | 9.968      | 4.095 | 1.243 | 3.294  | 9.9E-04  | 0.00392433 | Gm16015       |
| ENSMUSG00000061852 | 8.111      | 4.087 | 1.166 | 3.505  | 4.6E-04  | 0.00192809 | Gm53056       |
| ENSMUSG00000075302 | 8.491      | 4.079 | 1.089 | 3.745  | 1.8E-04  | 0.00082225 | Erich2        |
| ENSMUSG00000070883 | 406.845    | 4.071 | 0.265 | 15.355 | 3.3E-53  | 1.9905E-51 | Ccdc173       |
| ENSMUSG00000037989 | 24.681     | 4.064 | 1.186 | 3.426  | 6.1E-04  | 0.00252582 | Wnk2          |
| ENSMUSG00000018916 | 132.489    | 4.038 | 0.508 | 7.957  | 1.8E-15  | 2.4064E-14 | Csf2          |
| ENSMUSG00000114761 | 596.400    | 4.036 | 0.582 | 6.939  | 3.9E-12  | 4.257E-11  | Gm47242       |
| ENSMUSG00000055546 | 189.389    | 4.028 | 0.359 | 11.219 | 3.3E-29  | 9.0144E-28 | Timd4         |
| ENSMUSG00000003617 | 8585.854   | 4.026 | 0.183 | 21.993 | 3.4E-107 | 7.13E-105  | Cp            |
| ENSMUSG00000040276 | 127.737    | 4.006 | 0.713 | 5.619  | 1.9E-08  | 1.487E-07  | Pacsin1       |
| ENSMUSG00000056133 | 20.499     | 4.003 | 0.932 | 4.296  | 1.7E-05  | 9.3012E-05 | Unc93a2       |
| ENSMUSG00000056078 | 3.220      | 4.001 | 1.659 | 2.411  | 1.6E-02  | 0.04704768 | Lipm          |
| ENSMUSG00000062488 | 22096.966  | 3.992 | 0.604 | 6.606  | 4.0E-11  | 3.9149E-10 | Ifit3b        |
| ENSMUSG00000102329 | 220.322    | 3.987 | 0.413 | 9.645  | 5.2E-22  | 1.0328E-20 | Gm10851       |
| ENSMUSG00000072294 | 10.102     | 3.982 | 1.324 | 3.008  | 2.6E-03  | 0.00957024 | Klf12         |
| ENSMUSG00000087436 | 10.828     | 3.977 | 0.925 | 4.300  | 1.7E-05  | 9.1334E-05 | Gm16156       |
| ENSMUSG00000043263 | 39578.366  | 3.971 | 0.461 | 8.610  | 7.3E-18  | 1.1642E-16 | Ifi209        |
| ENSMUSG00000074627 | 21.061     | 3.965 | 0.921 | 4.304  | 1.7E-05  | 8.9695E-05 | Mroh8         |
| ENSMUSG00000109695 | 24.540     | 3.962 | 0.735 | 5.395  | 6.9E-08  | 5.001E-07  | Gm31166       |
| ENSMUSG00000034987 | 763.302    | 3.955 | 0.301 | 13.127 | 2.3E-39  | 9.2474E-38 | Hrh2          |
| ENSMUSG00000023903 | 1804.085   | 3.950 | 0.195 | 20.254 | 3.3E-91  | 5.1029E-89 | Mmp25         |
| ENSMUSG00000090125 | 977.255    | 3.941 | 0.457 | 8.629  | 6.2E-18  | 9.9479E-17 | Pou3f1        |
| ENSMUSG00000063903 | 41.976     | 3.922 | 0.747 | 5.248  | 1.5E-07  | 1.0757E-06 | Klk1          |
| ENSMUSG00000117440 | 4.466      | 3.920 | 1.587 | 2.470  | 1.3E-02  | 0.04068692 | Gm50087       |
| ENSMUSG00000055547 | 7.917      | 3.919 | 1.368 | 2.865  | 4.2E-03  | 0.01448085 | Apobec4       |
| ENSMUSG00000074274 | 7.768      | 3.915 | 1.240 | 3.157  | 1.6E-03  | 0.00608202 | D930028M14Rik |
| ENSMUSG00000044338 | 71.924     | 3.912 | 0.851 | 4.599  | 4.3E-06  | 2.4824E-05 | Ap1nr         |
| ENSMUSG00000114705 | 7.396      | 3.911 | 1.573 | 2.486  | 1.3E-02  | 0.03915989 | Gm18760       |

|                    |           |       |       |        |          |            |               |
|--------------------|-----------|-------|-------|--------|----------|------------|---------------|
| ENSMUSG00000032688 | 8382.125  | 3.909 | 0.108 | 36.231 | 2.0E-287 | 1.183E-283 | Malt1         |
| ENSMUSG00000006310 | 378.726   | 3.909 | 0.433 | 9.018  | 1.9E-19  | 3.3703E-18 | Zbtb32        |
| ENSMUSG00000104941 | 13.377    | 3.908 | 0.865 | 4.517  | 6.3E-06  | 3.5736E-05 | Gm8953        |
| ENSMUSG00000113701 | 68.368    | 3.904 | 0.624 | 6.252  | 4.0E-10  | 3.6951E-09 | B230303A05Rik |
| ENSMUSG00000024678 | 371.647   | 3.898 | 0.279 | 13.947 | 3.3E-44  | 1.5127E-42 | Ms4a4d        |
| ENSMUSG00000031722 | 52862.025 | 3.898 | 0.137 | 28.471 | 2.7E-178 | 2.088E-175 | Hp            |
| ENSMUSG00000099930 | 37.403    | 3.890 | 0.643 | 6.054  | 1.4E-09  | 1.2264E-08 | Gm2396        |
| ENSMUSG00000026773 | 12355.721 | 3.887 | 0.157 | 24.762 | 2.3E-135 | 8.585E-133 | Pfkfb3        |
| ENSMUSG00000086479 | 33.023    | 3.886 | 0.792 | 4.904  | 9.4E-07  | 5.9286E-06 | Gm16014       |
| ENSMUSG00000097804 | 198.752   | 3.885 | 0.326 | 11.926 | 8.7E-33  | 2.7534E-31 | Gm16685       |
| ENSMUSG00000105550 | 35.601    | 3.878 | 0.631 | 6.144  | 8.0E-10  | 7.1427E-09 | Gm35585       |
| ENSMUSG00000028525 | 7388.412  | 3.878 | 0.116 | 33.308 | 3.0E-243 | 5.517E-240 | Pde4b         |
| ENSMUSG00000090881 | 403.136   | 3.877 | 0.334 | 11.607 | 3.8E-31  | 1.1142E-29 | Phf11         |
| ENSMUSG00000024402 | 138.576   | 3.871 | 0.904 | 4.281  | 1.9E-05  | 9.8869E-05 | Lta           |
| ENSMUSG00000040666 | 18.049    | 3.870 | 0.972 | 3.983  | 6.8E-05  | 0.00033278 | Sh3bgr        |
| ENSMUSG00000112767 | 7.793     | 3.870 | 1.065 | 3.632  | 2.8E-04  | 0.00123667 | Gm47532       |
| ENSMUSG00000073409 | 2575.069  | 3.865 | 0.363 | 10.658 | 1.6E-26  | 3.8678E-25 | H2-Q6         |
| ENSMUSG00000112762 | 7.601     | 3.863 | 1.492 | 2.589  | 9.6E-03  | 0.03017466 | 4930459C07Rik |
| ENSMUSG00000087477 | 732.108   | 3.859 | 0.618 | 6.240  | 4.4E-10  | 3.9757E-09 | Gm13822       |
| ENSMUSG00000114070 | 85.284    | 3.859 | 0.500 | 7.715  | 1.2E-14  | 1.5624E-13 | Gm47727       |
| ENSMUSG00000025279 | 812.133   | 3.852 | 0.296 | 13.002 | 1.2E-38  | 4.6598E-37 | Dnase113      |
| ENSMUSG00000026971 | 10.957    | 3.844 | 1.411 | 2.725  | 6.4E-03  | 0.0213097  | Itgb6         |
| ENSMUSG00000064833 | 3.724     | 3.841 | 1.452 | 2.646  | 8.2E-03  | 0.02618701 | Gm25926       |
| ENSMUSG00000097150 | 5.990     | 3.841 | 1.568 | 2.449  | 1.4E-02  | 0.04287751 | Gm26513       |
| ENSMUSG00000062511 | 15.653    | 3.839 | 0.983 | 3.904  | 9.5E-05  | 0.00045056 | 4930512M02Rik |
| ENSMUSG00000034258 | 74.139    | 3.839 | 0.730 | 5.261  | 1.4E-07  | 1.0056E-06 | Flvcr2        |
| ENSMUSG00000091491 | 19.027    | 3.831 | 1.083 | 3.537  | 4.0E-04  | 0.00172727 | Vmn2r97       |
| ENSMUSG00000037447 | 7351.420  | 3.830 | 0.175 | 21.909 | 2.2E-106 | 4.497E-104 | Arid5a        |
| ENSMUSG00000028583 | 8869.293  | 3.827 | 0.210 | 18.240 | 2.5E-74  | 2.5501E-72 | Pdpn          |
| ENSMUSG00000117964 | 456.167   | 3.824 | 0.292 | 13.102 | 3.2E-39  | 1.2786E-37 | Gm36043       |
| ENSMUSG00000117713 | 3.188     | 3.816 | 1.480 | 2.578  | 9.9E-03  | 0.0310425  | Gm46637       |
| ENSMUSG00000031639 | 2255.707  | 3.812 | 0.327 | 11.657 | 2.1E-31  | 6.288E-30  | Tlr3          |
| ENSMUSG00000052477 | 282.636   | 3.805 | 0.423 | 8.998  | 2.3E-19  | 4.021E-18  | C130026I21Rik |
| ENSMUSG00000024401 | 8033.450  | 3.803 | 0.124 | 30.586 | 1.9E-205 | 1.809E-202 | Tnf           |
| ENSMUSG00000044058 | 21.210    | 3.798 | 0.731 | 5.196  | 2.0E-07  | 1.3964E-06 | Mthfr-ps1     |
| ENSMUSG00000005089 | 47.029    | 3.794 | 0.806 | 4.706  | 2.5E-06  | 1.5183E-05 | Slc1a2        |
| ENSMUSG00000109807 | 48.328    | 3.794 | 0.603 | 6.297  | 3.0E-10  | 2.8058E-09 | Gm45244       |
| ENSMUSG00000062232 | 7049.801  | 3.793 | 0.169 | 22.428 | 2.1E-111 | 4.777E-109 | Rapgef2       |
| ENSMUSG00000102862 | 64.657    | 3.789 | 0.487 | 7.788  | 6.8E-15  | 8.8651E-14 | Gm37640       |
| ENSMUSG00000015316 | 1117.751  | 3.786 | 0.269 | 14.075 | 5.4E-45  | 2.5661E-43 | Slamf1        |
| ENSMUSG00000026235 | 133.187   | 3.785 | 0.584 | 6.479  | 9.2E-11  | 8.8791E-10 | Epha4         |
| ENSMUSG00000047293 | 68.701    | 3.783 | 0.704 | 5.374  | 7.7E-08  | 5.5848E-07 | Gpr15         |
| ENSMUSG00000081219 | 3243.346  | 3.783 | 0.192 | 19.749 | 8.2E-87  | 1.1449E-84 | Bambi-ps1     |
| ENSMUSG00000036995 | 359.119   | 3.782 | 0.461 | 8.197  | 2.5E-16  | 3.5652E-15 | Asap3         |
| ENSMUSG00000068245 | 17799.599 | 3.781 | 0.483 | 7.827  | 5.0E-15  | 6.5995E-14 | Phf11d        |
| ENSMUSG00000073491 | 12074.153 | 3.777 | 0.550 | 6.863  | 6.7E-12  | 7.072E-11  | Ifi213        |
| ENSMUSG00000051969 | 18.580    | 3.776 | 1.008 | 3.747  | 1.8E-04  | 0.00081734 | Tlr11         |
| ENSMUSG00000069793 | 2521.265  | 3.774 | 0.378 | 9.972  | 2.0E-23  | 4.3388E-22 | Slfn9         |
| ENSMUSG00000100398 | 24.262    | 3.771 | 0.783 | 4.813  | 1.5E-06  | 9.1516E-06 | Gm5251        |
| ENSMUSG00000005202 | 16.412    | 3.764 | 1.479 | 2.544  | 1.1E-02  | 0.03390809 | Shbg          |
| ENSMUSG00000108291 | 490.576   | 3.764 | 0.301 | 12.507 | 6.9E-36  | 2.4204E-34 | Gm44292       |
| ENSMUSG00000062480 | 9.555     | 3.762 | 1.434 | 2.624  | 8.7E-03  | 0.02770997 | Acat3         |



|                    |            |       |       |        |          |            |               |
|--------------------|------------|-------|-------|--------|----------|------------|---------------|
| ENSMUSG00000078853 | 28530.792  | 3.761 | 0.400 | 9.393  | 5.8E-21  | 1.1076E-19 | Igtp          |
| ENSMUSG00000021990 | 2673.697   | 3.761 | 0.168 | 22.402 | 3.7E-111 | 8.384E-109 | Spatal3       |
| ENSMUSG00000024546 | 6.870      | 3.760 | 1.179 | 3.189  | 1.4E-03  | 0.0054958  | 4930546C10Rik |
| ENSMUSG00000103105 | 13.785     | 3.749 | 1.192 | 3.146  | 1.7E-03  | 0.00630018 | Gm18752       |
| ENSMUSG00000090222 | 1412.024   | 3.739 | 0.447 | 8.364  | 6.0E-17  | 9.1399E-16 | Ifi203-ps     |
| ENSMUSG00000022534 | 8154.692   | 3.734 | 0.166 | 22.498 | 4.3E-112 | 1.001E-109 | Mefv          |
| ENSMUSG00000033576 | 75.443     | 3.724 | 1.445 | 2.578  | 9.9E-03  | 0.03105319 | Apol6         |
| ENSMUSG00000021638 | 19.353     | 3.714 | 1.429 | 2.600  | 9.3E-03  | 0.02937376 | Ocln          |
| ENSMUSG00000032899 | 41.694     | 3.709 | 0.916 | 4.050  | 5.1E-05  | 0.00025523 | Styk1         |
| ENSMUSG00000079491 | 768.564    | 3.706 | 0.334 | 11.105 | 1.2E-28  | 3.1677E-27 | H2-T10        |
| ENSMUSG00000078920 | 38745.023  | 3.703 | 0.451 | 8.218  | 2.1E-16  | 3.003E-15  | Ifi47         |
| ENSMUSG00000000093 | 53.853     | 3.702 | 0.875 | 4.233  | 2.3E-05  | 0.00012103 | Tbx2          |
| ENSMUSG00000102037 | 3515.240   | 3.699 | 0.126 | 29.469 | 7.2E-191 | 6.157E-188 | Bcl2a1a       |
| ENSMUSG00000097203 | 12.295     | 3.696 | 1.182 | 3.128  | 1.8E-03  | 0.00665335 | 4732419C18Rik |
| ENSMUSG00000074896 | 94595.013  | 3.688 | 0.615 | 5.999  | 2.0E-09  | 1.6971E-08 | Ifit3         |
| ENSMUSG00000091144 | 407.671    | 3.682 | 0.518 | 7.108  | 1.2E-12  | 1.3161E-11 | Phf11c        |
| ENSMUSG00000035561 | 4913.182   | 3.668 | 0.229 | 15.989 | 1.5E-57  | 1.0632E-55 | Aldh1b1       |
| ENSMUSG00000000805 | 33.243     | 3.666 | 0.685 | 5.351  | 8.8E-08  | 6.2928E-07 | Car4          |
| ENSMUSG00000047945 | 104556.854 | 3.663 | 0.172 | 21.335 | 5.4E-101 | 9.929E-99  | Marcks11      |
| ENSMUSG00000044350 | 13312.753  | 3.660 | 0.161 | 22.677 | 7.5E-114 | 1.889E-111 | Lacc1         |
| ENSMUSG00000004359 | 9303.058   | 3.659 | 0.137 | 26.644 | 2.1E-156 | 1.238E-153 | Spic          |
| ENSMUSG00000110484 | 10.437     | 3.659 | 1.152 | 3.176  | 1.5E-03  | 0.00573402 | Gm45712       |
| ENSMUSG00000005763 | 154.127    | 3.659 | 0.529 | 6.910  | 4.8E-12  | 5.161E-11  | Cd247         |
| ENSMUSG00000024778 | 5128.421   | 3.649 | 0.109 | 33.542 | 1.2E-246 | 2.354E-243 | Fas           |
| ENSMUSG00000003309 | 23.083     | 3.647 | 1.331 | 2.741  | 6.1E-03  | 0.02043763 | Ap1m2         |
| ENSMUSG00000029862 | 20.137     | 3.636 | 1.137 | 3.198  | 1.4E-03  | 0.00534989 | Clcn1         |
| ENSMUSG00000045381 | 94.128     | 3.636 | 0.753 | 4.830  | 1.4E-06  | 8.4532E-06 | Olfir433      |
| ENSMUSG00000038453 | 11.191     | 3.635 | 0.949 | 3.830  | 1.3E-04  | 0.00059928 | Srcin1        |
| ENSMUSG00000073402 | 4.087      | 3.635 | 1.325 | 2.743  | 6.1E-03  | 0.02031058 | Gm8909        |
| ENSMUSG00000103308 | 35.860     | 3.634 | 0.637 | 5.707  | 1.2E-08  | 9.1432E-08 | Gm37800       |
| ENSMUSG00000029798 | 5882.736   | 3.631 | 0.445 | 8.152  | 3.6E-16  | 5.1473E-15 | Herc6         |
| ENSMUSG00000117432 | 5.661      | 3.630 | 1.316 | 2.759  | 5.8E-03  | 0.01943665 | Gm49967       |
| ENSMUSG00000095197 | 6.113      | 3.629 | 1.318 | 2.754  | 5.9E-03  | 0.01967736 | Ighv1-59      |
| ENSMUSG00000000248 | 13.258     | 3.629 | 1.219 | 2.976  | 2.9E-03  | 0.01053925 | Clec2g        |
| ENSMUSG00000117269 | 195.731    | 3.622 | 0.376 | 9.626  | 6.2E-22  | 1.2415E-20 | Gm9706        |
| ENSMUSG00000037405 | 23982.238  | 3.621 | 0.128 | 28.181 | 1.0E-174 | 7.556E-172 | Icam1         |
| ENSMUSG00000079654 | 257.623    | 3.615 | 0.689 | 5.246  | 1.6E-07  | 1.0832E-06 | Prrt4         |
| ENSMUSG00000035513 | 1009.689   | 3.612 | 0.435 | 8.310  | 9.6E-17  | 1.4232E-15 | Ntng2         |
| ENSMUSG00000097115 | 14.866     | 3.611 | 1.335 | 2.705  | 6.8E-03  | 0.0224273  | 1810019N24Rik |
| ENSMUSG00000097638 | 20.503     | 3.609 | 1.104 | 3.268  | 1.1E-03  | 0.00426635 | Carlr         |
| ENSMUSG00000108732 | 313.862    | 3.599 | 0.347 | 10.370 | 3.4E-25  | 7.8232E-24 | 2310043P16Rik |
| ENSMUSG00000112267 | 9.314      | 3.598 | 1.356 | 2.653  | 8.0E-03  | 0.02567581 | Gm47903       |
| ENSMUSG00000055030 | 11.820     | 3.596 | 1.238 | 2.905  | 3.7E-03  | 0.01295144 | Sprr2e        |
| ENSMUSG00000091553 | 13.291     | 3.590 | 1.343 | 2.673  | 7.5E-03  | 0.02437637 | Serpina3e-ps  |
| ENSMUSG00000001663 | 763.268    | 3.588 | 0.296 | 12.111 | 9.3E-34  | 3.0353E-32 | Gstt1         |
| ENSMUSG00000082292 | 13243.422  | 3.588 | 0.479 | 7.496  | 6.6E-14  | 8.1378E-13 | Gm12250       |
| ENSMUSG00000046486 | 6.264      | 3.585 | 1.182 | 3.033  | 2.4E-03  | 0.00888838 | Olfir231      |
| ENSMUSG00000056004 | 37.792     | 3.581 | 0.684 | 5.237  | 1.6E-07  | 1.1354E-06 | Elapor2       |
| ENSMUSG00000005640 | 18.414     | 3.580 | 1.271 | 2.817  | 4.9E-03  | 0.01661527 | Insrr         |
| ENSMUSG00000030069 | 67.731     | 3.578 | 0.716 | 4.997  | 5.8E-07  | 3.7725E-06 | Prok2         |
| ENSMUSG00000118024 | 107.662    | 3.575 | 0.574 | 6.233  | 4.6E-10  | 4.136E-09  | Gm50419       |
| ENSMUSG00000016498 | 227.692    | 3.574 | 0.408 | 8.755  | 2.0E-18  | 3.3933E-17 | Pdcd11g2      |

|                    |            |       |       |        |          |            |               |
|--------------------|------------|-------|-------|--------|----------|------------|---------------|
| ENSMUSG00000103114 | 9.164      | 3.566 | 1.373 | 2.597  | 9.4E-03  | 0.02959104 | Gm32200       |
| ENSMUSG00000062007 | 462.940    | 3.566 | 0.373 | 9.573  | 1.0E-21  | 2.0641E-20 | Hsh2d         |
| ENSMUSG00000112627 | 1178.118   | 3.554 | 0.192 | 18.541 | 9.6E-77  | 1.0433E-74 | 4933412E12Rik |
| ENSMUSG00000048498 | 133.325    | 3.553 | 0.950 | 3.741  | 1.8E-04  | 0.0008336  | Cd300e        |
| ENSMUSG00000020010 | 413.234    | 3.550 | 0.303 | 11.734 | 8.5E-32  | 2.564E-30  | Vnn3          |
| ENSMUSG00000000982 | 31011.612  | 3.548 | 0.130 | 27.354 | 9.6E-165 | 6.392E-162 | Ccl3          |
| ENSMUSG00000097244 | 8.960      | 3.547 | 0.878 | 4.040  | 5.3E-05  | 0.00026544 | Gm7928        |
| ENSMUSG00000116639 | 126.584    | 3.546 | 0.613 | 5.783  | 7.3E-09  | 5.9391E-08 | Gm49730       |
| ENSMUSG00000090272 | 18300.686  | 3.545 | 0.388 | 9.140  | 6.2E-20  | 1.1255E-18 | Mndal         |
| ENSMUSG00000026896 | 26664.320  | 3.544 | 0.388 | 9.129  | 6.9E-20  | 1.243E-18  | Ifih1         |
| ENSMUSG00000028356 | 57.995     | 3.534 | 1.366 | 2.588  | 9.7E-03  | 0.03032191 | Ambp          |
| ENSMUSG00000019489 | 16.605     | 3.530 | 1.221 | 2.891  | 3.8E-03  | 0.01344568 | Cd70          |
| ENSMUSG00000102411 | 7.072      | 3.529 | 1.458 | 2.420  | 1.6E-02  | 0.04605701 | Gm36936       |
| ENSMUSG00000055994 | 501.136    | 3.528 | 0.346 | 10.211 | 1.8E-24  | 3.9699E-23 | Nod2          |
| ENSMUSG00000099241 | 56.302     | 3.528 | 0.473 | 7.462  | 8.5E-14  | 1.0446E-12 | Gvin-ps2      |
| ENSMUSG00000090891 | 7.466      | 3.524 | 1.404 | 2.511  | 1.2E-02  | 0.03689225 | D6ErtD527e    |
| ENSMUSG00000049939 | 452.896    | 3.523 | 0.674 | 5.225  | 1.7E-07  | 1.2065E-06 | Lrrc4         |
| ENSMUSG00000070031 | 7941.013   | 3.518 | 0.167 | 21.122 | 5.0E-99  | 8.629E-97  | Sp140         |
| ENSMUSG00000103364 | 39.418     | 3.514 | 0.588 | 5.974  | 2.3E-09  | 1.9665E-08 | Gm38157       |
| ENSMUSG00000029298 | 6203.522   | 3.512 | 0.371 | 9.474  | 2.7E-21  | 5.2361E-20 | Gbp9          |
| ENSMUSG00000025498 | 137012.824 | 3.504 | 0.437 | 8.009  | 1.2E-15  | 1.6014E-14 | Irf7          |
| ENSMUSG00000044548 | 19.993     | 3.502 | 0.849 | 4.123  | 3.7E-05  | 0.00018963 | Dact1         |
| ENSMUSG00000033966 | 67.443     | 3.500 | 0.723 | 4.840  | 1.3E-06  | 8.0566E-06 | Cdkl4         |
| ENSMUSG00000029322 | 13838.083  | 3.500 | 0.132 | 26.416 | 8.9E-154 | 4.861E-151 | Plac8         |
| ENSMUSG00000119880 | 3.391      | 3.493 | 1.422 | 2.457  | 1.4E-02  | 0.04210012 | AC161348.2    |
| ENSMUSG00000110502 | 4.583      | 3.491 | 1.457 | 2.396  | 1.7E-02  | 0.04879835 | Gm8804        |
| ENSMUSG00000087361 | 25.288     | 3.474 | 0.572 | 6.072  | 1.3E-09  | 1.0982E-08 | 0610043K17Rik |
| ENSMUSG00000024842 | 27.133     | 3.473 | 0.952 | 3.649  | 2.6E-04  | 0.00116508 | Cabp4         |
| ENSMUSG00000073980 | 91.019     | 3.455 | 0.722 | 4.788  | 1.7E-06  | 1.0323E-05 | Gm9574        |
| ENSMUSG00000037977 | 8.975      | 3.443 | 1.440 | 2.391  | 1.7E-02  | 0.04938539 | 6430571L13Rik |
| ENSMUSG00000118640 | 16.784     | 3.442 | 0.763 | 4.509  | 6.5E-06  | 3.7076E-05 | Gm7582        |
| ENSMUSG00000075225 | 34.154     | 3.442 | 0.784 | 4.392  | 1.1E-05  | 6.1699E-05 | Ccdc162       |
| ENSMUSG00000074342 | 3158.676   | 3.441 | 0.223 | 15.464 | 6.1E-54  | 3.7304E-52 | I830077J02Rik |
| ENSMUSG00000079323 | 9.693      | 3.438 | 1.062 | 3.237  | 1.2E-03  | 0.00472661 | Gm20661       |
| ENSMUSG00000061356 | 13.088     | 3.431 | 1.377 | 2.492  | 1.3E-02  | 0.03863245 | Nuggc         |
| ENSMUSG00000086527 | 67.697     | 3.431 | 0.523 | 6.555  | 5.6E-11  | 5.4393E-10 | Gm15856       |
| ENSMUSG00000099974 | 4319.343   | 3.430 | 0.119 | 28.894 | 1.4E-183 | 1.166E-180 | Bcl2a1d       |
| ENSMUSG00000032487 | 9238.799   | 3.430 | 0.285 | 12.047 | 2.0E-33  | 6.557E-32  | Ptgs2         |
| ENSMUSG00000048329 | 16.756     | 3.429 | 1.279 | 2.680  | 7.4E-03  | 0.02391662 | Mfsd6l        |
| ENSMUSG00000050014 | 33.381     | 3.416 | 0.844 | 4.047  | 5.2E-05  | 0.00025866 | Apol10b       |
| ENSMUSG00000050671 | 9.607      | 3.413 | 1.350 | 2.528  | 1.1E-02  | 0.03530437 | Ism2          |
| ENSMUSG00000030717 | 10514.134  | 3.412 | 0.138 | 24.650 | 3.6E-134 | 1.349E-131 | Nupr1         |
| ENSMUSG00000063611 | 3051.124   | 3.412 | 0.168 | 20.351 | 4.6E-92  | 7.1762E-90 | Gm10134       |
| ENSMUSG00000047511 | 29.889     | 3.412 | 0.812 | 4.200  | 2.7E-05  | 0.00013806 | Olfr1396      |
| ENSMUSG00000097134 | 330.502    | 3.411 | 0.348 | 9.788  | 1.3E-22  | 2.6125E-21 | 1110002J07Rik |
| ENSMUSG00000018845 | 15.493     | 3.409 | 0.971 | 3.509  | 4.5E-04  | 0.00190057 | Unc45b        |
| ENSMUSG00000030283 | 24.324     | 3.407 | 0.876 | 3.888  | 1.0E-04  | 0.00047843 | St8sial       |
| ENSMUSG00000091199 | 6.719      | 3.404 | 1.111 | 3.065  | 2.2E-03  | 0.00809287 | Gm2619        |
| ENSMUSG00000046687 | 705.428    | 3.403 | 0.294 | 11.582 | 5.1E-31  | 1.4893E-29 | Gm5424        |
| ENSMUSG00000054676 | 13946.750  | 3.401 | 0.168 | 20.215 | 7.2E-91  | 1.1046E-88 | 1600014C10Rik |
| ENSMUSG00000030359 | 6.452      | 3.400 | 1.202 | 2.828  | 4.7E-03  | 0.01612652 | Pzp           |
| ENSMUSG00000070661 | 9.235      | 3.394 | 1.233 | 2.752  | 5.9E-03  | 0.01981051 | Rnfl86        |

|                    |           |       |       |        |          |            |               |
|--------------------|-----------|-------|-------|--------|----------|------------|---------------|
| ENSMUSG00000045664 | 2130.259  | 3.388 | 0.200 | 16.951 | 1.9E-64  | 1.6146E-62 | Cdc42ep2      |
| ENSMUSG00000055833 | 13.927    | 3.384 | 0.989 | 3.421  | 6.2E-04  | 0.00257032 | 1700034H15Rik |
| ENSMUSG00000004947 | 12521.095 | 3.384 | 0.160 | 21.208 | 8.1E-100 | 1.4668E-97 | Dtx2          |
| ENSMUSG00000093800 | 6.825     | 3.383 | 1.324 | 2.555  | 1.1E-02  | 0.03297799 | Gm20796       |
| ENSMUSG00000094561 | 25.462    | 3.378 | 1.222 | 2.764  | 5.7E-03  | 0.01914834 | Ighv1-22      |
| ENSMUSG00000082116 | 33.806    | 3.377 | 0.533 | 6.339  | 2.3E-10  | 2.1614E-09 | Gm12188       |
| ENSMUSG00000031712 | 7844.881  | 3.374 | 0.271 | 12.438 | 1.6E-35  | 5.6487E-34 | Il15          |
| ENSMUSG00000107985 | 51.462    | 3.372 | 0.519 | 6.497  | 8.2E-11  | 7.9122E-10 | Gm35037       |
| ENSMUSG00000000562 | 243.315   | 3.368 | 0.391 | 8.622  | 6.6E-18  | 1.0579E-16 | Adora3        |
| ENSMUSG00000090016 | 9.262     | 3.366 | 0.974 | 3.456  | 5.5E-04  | 0.00227733 | Gm16578       |
| ENSMUSG00000108064 | 43.105    | 3.362 | 0.577 | 5.829  | 5.6E-09  | 4.562E-08  | Gm44423       |
| ENSMUSG00000037752 | 3636.093  | 3.353 | 0.145 | 23.106 | 4.0E-118 | 1.111E-115 | Xkr8          |
| ENSMUSG00000028392 | 14.705    | 3.347 | 1.280 | 2.614  | 8.9E-03  | 0.02834749 | Bspry         |
| ENSMUSG00000056116 | 11457.070 | 3.343 | 0.336 | 9.958  | 2.3E-23  | 4.9686E-22 | H2-T22        |
| ENSMUSG00000038179 | 25000.606 | 3.342 | 0.160 | 20.890 | 6.6E-97  | 1.0955E-94 | Slamf7        |
| ENSMUSG00000107634 | 23.286    | 3.338 | 0.658 | 5.074  | 3.9E-07  | 2.5791E-06 | Gm36816       |
| ENSMUSG00000029082 | 3217.498  | 3.338 | 0.157 | 21.198 | 1.0E-99  | 1.7606E-97 | Bst1          |
| ENSMUSG00000112121 | 5.681     | 3.336 | 1.328 | 2.513  | 1.2E-02  | 0.03673993 | C230072F16Rik |
| ENSMUSG00000027562 | 1587.978  | 3.335 | 0.257 | 12.980 | 1.6E-38  | 6.2188E-37 | Car2          |
| ENSMUSG00000039217 | 4454.010  | 3.330 | 0.156 | 21.413 | 1.0E-101 | 1.913E-99  | Il18          |
| ENSMUSG00000023947 | 9726.226  | 3.326 | 0.137 | 24.284 | 2.9E-130 | 1.03E-127  | Nfkbie        |
| ENSMUSG00000019935 | 11.575    | 3.321 | 1.346 | 2.468  | 1.4E-02  | 0.04097677 | Slc17a8       |
| ENSMUSG00000039997 | 10956.785 | 3.321 | 0.389 | 8.546  | 1.3E-17  | 2.0166E-16 | Ifi203        |
| ENSMUSG00000088705 | 7.560     | 3.314 | 1.371 | 2.417  | 1.6E-02  | 0.04636484 | Gm25549       |
| ENSMUSG00000020400 | 14726.826 | 3.313 | 0.095 | 34.969 | 6.6E-268 | 2.628E-264 | Tnip1         |
| ENSMUSG00000027514 | 20488.565 | 3.311 | 0.428 | 7.743  | 9.7E-15  | 1.2617E-13 | Zbp1          |
| ENSMUSG00000031327 | 95.079    | 3.309 | 0.487 | 6.801  | 1.0E-11  | 1.0752E-10 | Chic1         |
| ENSMUSG00000081723 | 721.226   | 3.297 | 0.168 | 19.654 | 5.3E-86  | 7.2871E-84 | Gm15931       |
| ENSMUSG00000082365 | 28.039    | 3.288 | 0.757 | 4.345  | 1.4E-05  | 7.53E-05   | Btf3-ps11     |
| ENSMUSG00000060675 | 3386.681  | 3.285 | 0.124 | 26.585 | 1.0E-155 | 5.832E-153 | Plaat3        |
| ENSMUSG00000039431 | 217.586   | 3.281 | 0.397 | 8.255  | 1.5E-16  | 2.2383E-15 | Mtmr7         |
| ENSMUSG00000026700 | 160.705   | 3.280 | 0.459 | 7.148  | 8.8E-13  | 9.9299E-12 | Tnfsf4        |
| ENSMUSG00000107320 | 41.907    | 3.275 | 0.675 | 4.849  | 1.2E-06  | 7.735E-06  | Gm42549       |
| ENSMUSG00000032065 | 177.273   | 3.273 | 0.318 | 10.295 | 7.4E-25  | 1.6954E-23 | Tex12         |
| ENSMUSG00000050394 | 309.054   | 3.268 | 0.349 | 9.356  | 8.2E-21  | 1.555E-19  | Armex6        |
| ENSMUSG00000027639 | 66926.318 | 3.263 | 0.202 | 16.143 | 1.3E-58  | 9.137E-57  | Samhd1        |
| ENSMUSG00000103845 | 22.881    | 3.261 | 1.014 | 3.215  | 1.3E-03  | 0.00506746 | Gm19026       |
| ENSMUSG00000079457 | 20.305    | 3.259 | 0.598 | 5.452  | 5.0E-08  | 3.6896E-07 | Gm7609        |
| ENSMUSG00000089716 | 11.546    | 3.254 | 0.867 | 3.752  | 1.8E-04  | 0.00080164 | Gm6264        |
| ENSMUSG00000038058 | 8274.818  | 3.253 | 0.170 | 19.190 | 4.5E-82  | 5.4377E-80 | Nod1          |
| ENSMUSG00000053044 | 37.578    | 3.252 | 0.793 | 4.100  | 4.1E-05  | 0.00020842 | Cd8b1         |
| ENSMUSG00000048905 | 34.548    | 3.250 | 1.087 | 2.989  | 2.8E-03  | 0.01015723 | Bnip5         |
| ENSMUSG00000047880 | 116.736   | 3.249 | 0.653 | 4.975  | 6.5E-07  | 4.1887E-06 | Cxcr5         |
| ENSMUSG00000012519 | 7422.656  | 3.247 | 0.191 | 16.999 | 8.4E-65  | 7.2173E-63 | Mlkl          |
| ENSMUSG00000013367 | 11.316    | 3.245 | 1.224 | 2.652  | 8.0E-03  | 0.02576281 | Iglon5        |
| ENSMUSG00000027314 | 48.751    | 3.235 | 0.900 | 3.595  | 3.2E-04  | 0.00140844 | Dll4          |
| ENSMUSG00000036381 | 3053.025  | 3.234 | 0.187 | 17.309 | 4.0E-67  | 3.6666E-65 | P2ry14        |
| ENSMUSG00000035356 | 10108.033 | 3.234 | 0.136 | 23.787 | 4.5E-125 | 1.516E-122 | Nfkbiz        |
| ENSMUSG00000090461 | 8.597     | 3.233 | 1.031 | 3.136  | 1.7E-03  | 0.00649942 | Iltifb        |
| ENSMUSG00000026536 | 9999.076  | 3.231 | 0.392 | 8.248  | 1.6E-16  | 2.3633E-15 | Ifi211        |
| ENSMUSG00000037406 | 716.757   | 3.226 | 0.228 | 14.179 | 1.2E-45  | 6.0246E-44 | Htra4         |
| ENSMUSG00000024789 | 5784.854  | 3.226 | 0.159 | 20.249 | 3.6E-91  | 5.5499E-89 | Jak2          |

|                    |           |       |       |        |          |            |               |
|--------------------|-----------|-------|-------|--------|----------|------------|---------------|
| ENSMUSG00000025497 | 8.311     | 3.213 | 1.347 | 2.386  | 1.7E-02  | 0.04993267 | Cdhr5         |
| ENSMUSG00000020227 | 8768.218  | 3.207 | 0.093 | 34.487 | 1.3E-260 | 3.071E-257 | Irak3         |
| ENSMUSG00000067297 | 276.580   | 3.206 | 0.611 | 5.251  | 1.5E-07  | 1.0575E-06 | Ifit1b12      |
| ENSMUSG00000114670 | 40.526    | 3.204 | 0.801 | 4.000  | 6.3E-05  | 0.00031113 | Gm18072       |
| ENSMUSG00000054720 | 5496.715  | 3.203 | 0.162 | 19.767 | 5.7E-87  | 8.0059E-85 | Lrrc8c        |
| ENSMUSG00000110657 | 8.659     | 3.203 | 1.098 | 2.917  | 3.5E-03  | 0.0125027  | Gm7684        |
| ENSMUSG00000078144 | 24.106    | 3.203 | 0.814 | 3.933  | 8.4E-05  | 0.00040264 | Capns2        |
| ENSMUSG00000059089 | 16783.239 | 3.201 | 0.218 | 14.664 | 1.1E-48  | 5.7813E-47 | Fcgr4         |
| ENSMUSG00000044317 | 69.903    | 3.196 | 0.681 | 4.696  | 2.6E-06  | 1.586E-05  | Gpr4          |
| ENSMUSG00000022661 | 3357.404  | 3.196 | 0.133 | 24.110 | 2.0E-128 | 6.801E-126 | Cd200         |
| ENSMUSG00000030124 | 1154.768  | 3.196 | 0.219 | 14.612 | 2.4E-48  | 1.2375E-46 | Lag3          |
| ENSMUSG00000102270 | 60.849    | 3.193 | 0.543 | 5.879  | 4.1E-09  | 3.4438E-08 | Gm8388        |
| ENSMUSG00000031896 | 59.677    | 3.184 | 0.608 | 5.234  | 1.7E-07  | 1.1544E-06 | Ctrl          |
| ENSMUSG00000065601 | 39.538    | 3.182 | 0.484 | 6.567  | 5.1E-11  | 5.0192E-10 | Mir146        |
| ENSMUSG00000049488 | 1621.325  | 3.179 | 0.200 | 15.892 | 7.2E-57  | 4.8894E-55 | Tmem67        |
| ENSMUSG00000023132 | 20.559    | 3.177 | 1.073 | 2.961  | 3.1E-03  | 0.01102556 | Gzma          |
| ENSMUSG00000078349 | 1133.914  | 3.175 | 0.301 | 10.551 | 5.0E-26  | 1.1965E-24 | AW011738      |
| ENSMUSG00000078763 | 7920.156  | 3.171 | 0.558 | 5.685  | 1.3E-08  | 1.0323E-07 | Slfn1         |
| ENSMUSG00000026822 | 94568.656 | 3.170 | 0.178 | 17.790 | 8.4E-71  | 8.2151E-69 | Lcn2          |
| ENSMUSG00000038540 | 31.438    | 3.169 | 0.952 | 3.330  | 8.7E-04  | 0.0034789  | Tmc3          |
| ENSMUSG00000018899 | 20908.127 | 3.168 | 0.184 | 17.236 | 1.4E-66  | 1.2697E-64 | Irf1          |
| ENSMUSG00000114790 | 10.533    | 3.166 | 1.195 | 2.650  | 8.1E-03  | 0.02590995 | 4921509O07Rik |
| ENSMUSG00000026946 | 8680.485  | 3.165 | 0.188 | 16.796 | 2.6E-63  | 2.0966E-61 | Nmi           |
| ENSMUSG00000112894 | 19.375    | 3.163 | 0.812 | 3.898  | 9.7E-05  | 0.00046142 | Gm47009       |
| ENSMUSG00000026532 | 27.308    | 3.158 | 0.938 | 3.368  | 7.6E-04  | 0.00307298 | Spta1         |
| ENSMUSG00000117571 | 39.742    | 3.152 | 0.717 | 4.397  | 1.1E-05  | 6.0505E-05 | 4933433H22Rik |
| ENSMUSG00000069540 | 26.477    | 3.143 | 0.633 | 4.963  | 6.9E-07  | 4.4455E-06 | Gm4925        |
| ENSMUSG00000020357 | 141.404   | 3.139 | 0.620 | 5.066  | 4.1E-07  | 2.6733E-06 | Flt4          |
| ENSMUSG00000072553 | 74.972    | 3.134 | 0.501 | 6.257  | 3.9E-10  | 3.5873E-09 | Gm525         |
| ENSMUSG00000020905 | 14.803    | 3.128 | 1.074 | 2.911  | 3.6E-03  | 0.01271143 | Usp43         |
| ENSMUSG00000051844 | 12.018    | 3.127 | 1.151 | 2.716  | 6.6E-03  | 0.02182848 | B230319C09Rik |
| ENSMUSG00000113494 | 10.848    | 3.126 | 1.058 | 2.954  | 3.1E-03  | 0.01123331 | Gm48102       |
| ENSMUSG00000097534 | 286.902   | 3.124 | 0.309 | 10.120 | 4.5E-24  | 9.9415E-23 | Gm16675       |
| ENSMUSG00000015377 | 692.740   | 3.124 | 0.301 | 10.371 | 3.4E-25  | 7.7306E-24 | Dennd6b       |
| ENSMUSG00000097006 | 626.855   | 3.119 | 0.223 | 14.014 | 1.3E-44  | 6.0644E-43 | 9530082P21Rik |
| ENSMUSG00000021364 | 29.030    | 3.112 | 0.778 | 4.003  | 6.3E-05  | 0.00030736 | Elov12        |
| ENSMUSG00000026548 | 3308.031  | 3.106 | 0.177 | 17.521 | 9.9E-69  | 9.3703E-67 | Slamf9        |
| ENSMUSG00000102882 | 36.378    | 3.103 | 0.842 | 3.686  | 2.3E-04  | 0.00101931 | Gm2065        |
| ENSMUSG00000037580 | 23668.284 | 3.099 | 0.191 | 16.210 | 4.3E-59  | 3.0605E-57 | Gch1          |
| ENSMUSG00000029605 | 781.462   | 3.098 | 0.412 | 7.518  | 5.6E-14  | 6.9007E-13 | Oas1b         |
| ENSMUSG00000031444 | 12525.815 | 3.097 | 0.142 | 21.807 | 2.0E-105 | 3.988E-103 | F10           |
| ENSMUSG00000113409 | 12.687    | 3.088 | 0.847 | 3.644  | 2.7E-04  | 0.0011866  | Gm8288        |
| ENSMUSG00000009585 | 11536.877 | 3.085 | 0.133 | 23.191 | 5.6E-119 | 1.564E-116 | Apobec3       |
| ENSMUSG00000030651 | 48.550    | 3.078 | 0.613 | 5.021  | 5.1E-07  | 3.3517E-06 | Art2b         |
| ENSMUSG00000034438 | 512.843   | 3.075 | 0.365 | 8.431  | 3.4E-17  | 5.2605E-16 | Gbp8          |
| ENSMUSG00000118410 | 17.635    | 3.066 | 0.976 | 3.140  | 1.7E-03  | 0.00640295 | AC139347.1    |
| ENSMUSG00000031488 | 4647.993  | 3.062 | 0.123 | 24.927 | 3.8E-137 | 1.459E-134 | Rab11fip1     |
| ENSMUSG00000055567 | 16.098    | 3.056 | 1.151 | 2.655  | 7.9E-03  | 0.02553903 | Unc80         |
| ENSMUSG00000045094 | 565.581   | 3.055 | 0.378 | 8.088  | 6.1E-16  | 8.5225E-15 | Arhgef37      |
| ENSMUSG00000085498 | 339.879   | 3.053 | 0.328 | 9.295  | 1.5E-20  | 2.7466E-19 | Gm14023       |
| ENSMUSG00000037944 | 2212.500  | 3.052 | 0.198 | 15.422 | 1.2E-53  | 7.0524E-52 | Ccr7          |
| ENSMUSG00000028599 | 97083.674 | 3.049 | 0.099 | 30.873 | 2.7E-209 | 2.869E-206 | Tnfrsf1b      |

|                    |           |       |       |        |          |            |               |
|--------------------|-----------|-------|-------|--------|----------|------------|---------------|
| ENSMUSG00000072844 | 1246.214  | 3.039 | 0.203 | 14.937 | 1.9E-50  | 1.0598E-48 | G530011O06Rik |
| ENSMUSG00000109488 | 4.913     | 3.035 | 1.072 | 2.831  | 4.6E-03  | 0.0159665  | Gm6828        |
| ENSMUSG00000085109 | 63.319    | 3.034 | 0.440 | 6.897  | 5.3E-12  | 5.6527E-11 | Gm15356       |
| ENSMUSG00000038352 | 7860.173  | 3.033 | 0.191 | 15.898 | 6.6E-57  | 4.4929E-55 | Arl5c         |
| ENSMUSG00000022586 | 4759.086  | 3.031 | 0.167 | 18.096 | 3.5E-73  | 3.5023E-71 | Ly6i          |
| ENSMUSG00000086866 | 37.013    | 3.024 | 0.609 | 4.963  | 6.9E-07  | 4.4455E-06 | 4930512H18Rik |
| ENSMUSG00000051379 | 709.622   | 3.023 | 0.204 | 14.808 | 1.3E-49  | 7.1802E-48 | Flrt3         |
| ENSMUSG00000079563 | 23.171    | 3.023 | 1.078 | 2.804  | 5.0E-03  | 0.0172259  | Pglyrp2       |
| ENSMUSG00000083392 | 6.610     | 3.020 | 1.070 | 2.821  | 4.8E-03  | 0.01642365 | Gm6335        |
| ENSMUSG00000115902 | 575.121   | 3.018 | 0.258 | 11.705 | 1.2E-31  | 3.6011E-30 | D730005E14Rik |
| ENSMUSG00000098489 | 9.849     | 3.016 | 1.140 | 2.646  | 8.2E-03  | 0.02618701 | Mir7678       |
| ENSMUSG00000106227 | 68.520    | 3.016 | 0.485 | 6.215  | 5.1E-10  | 4.6142E-09 | Gm43464       |
| ENSMUSG00000021640 | 28.787    | 3.015 | 0.804 | 3.749  | 1.8E-04  | 0.0008099  | Naip1         |
| ENSMUSG00000026535 | 38.176    | 3.004 | 0.692 | 4.340  | 1.4E-05  | 7.7038E-05 | Ifi202b       |
| ENSMUSG00000060550 | 3526.437  | 3.001 | 0.331 | 9.079  | 1.1E-19  | 1.945E-18  | H2-Q7         |
| ENSMUSG00000030747 | 4957.300  | 3.000 | 0.190 | 15.779 | 4.3E-56  | 2.8472E-54 | Dgat2         |
| ENSMUSG00000090176 | 27.346    | 2.995 | 1.104 | 2.712  | 6.7E-03  | 0.02206032 | Cd200r2       |
| ENSMUSG00000032815 | 1015.774  | 2.995 | 0.215 | 13.940 | 3.6E-44  | 1.6828E-42 | Fanca         |
| ENSMUSG00000063268 | 9746.936  | 2.992 | 0.268 | 11.175 | 5.4E-29  | 1.4584E-27 | Parp10        |
| ENSMUSG00000032724 | 2281.438  | 2.990 | 0.230 | 13.015 | 1.0E-38  | 3.9636E-37 | Abtb2         |
| ENSMUSG00000032372 | 311.253   | 2.990 | 0.345 | 8.655  | 4.9E-18  | 7.9422E-17 | Plscr2        |
| ENSMUSG00000074151 | 4949.911  | 2.988 | 0.208 | 14.373 | 7.6E-47  | 3.812E-45  | Nlrc5         |
| ENSMUSG00000063142 | 4.120     | 2.987 | 1.245 | 2.400  | 1.6E-02  | 0.04837796 | Kcnma1        |
| ENSMUSG00000114980 | 82.850    | 2.985 | 0.634 | 4.707  | 2.5E-06  | 1.5118E-05 | 4933432I03Rik |
| ENSMUSG00000028266 | 12645.164 | 2.983 | 0.092 | 32.375 | 6.1E-230 | 8.125E-227 | Lmo4          |
| ENSMUSG00000066152 | 15083.653 | 2.981 | 0.115 | 26.014 | 3.4E-149 | 1.593E-146 | Slc31a2       |
| ENSMUSG00000056366 | 52.409    | 2.977 | 0.374 | 7.949  | 1.9E-15  | 2.5476E-14 | Fabp3-ps1     |
| ENSMUSG00000031927 | 201.722   | 2.977 | 0.358 | 8.325  | 8.4E-17  | 1.2593E-15 | 1700012B09Rik |
| ENSMUSG00000035355 | 67.523    | 2.975 | 0.554 | 5.372  | 7.8E-08  | 5.6288E-07 | Kcnh4         |
| ENSMUSG00000093672 | 48.026    | 2.973 | 0.770 | 3.860  | 1.1E-04  | 0.00053365 | Gm20655       |
| ENSMUSG00000053318 | 10221.974 | 2.972 | 0.159 | 18.732 | 2.7E-78  | 3.1096E-76 | Slamf8        |
| ENSMUSG00000053820 | 202.106   | 2.971 | 0.265 | 11.203 | 3.9E-29  | 1.0686E-27 | Bcl2a1c       |
| ENSMUSG00000109560 | 23.884    | 2.968 | 0.717 | 4.138  | 3.5E-05  | 0.00017816 | Gm8463        |
| ENSMUSG00000118021 | 11.909    | 2.967 | 1.110 | 2.674  | 7.5E-03  | 0.02433218 | Gm50130       |
| ENSMUSG00000022901 | 10831.626 | 2.966 | 0.199 | 14.884 | 4.2E-50  | 2.3248E-48 | Cd86          |
| ENSMUSG00000027646 | 3213.323  | 2.964 | 0.140 | 21.192 | 1.1E-99  | 1.9678E-97 | Src           |
| ENSMUSG00000060519 | 35481.983 | 2.963 | 0.305 | 9.707  | 2.8E-22  | 5.6973E-21 | Tor3a         |
| ENSMUSG00000046879 | 31796.016 | 2.962 | 0.372 | 7.959  | 1.7E-15  | 2.363E-14  | Irgm1         |
| ENSMUSG00000079018 | 95.994    | 2.960 | 0.458 | 6.470  | 9.8E-11  | 9.3948E-10 | Ly6c1         |
| ENSMUSG00000098050 | 1265.824  | 2.959 | 0.178 | 16.579 | 9.9E-62  | 7.6624E-60 | Gm5345        |
| ENSMUSG00000034266 | 3567.240  | 2.959 | 0.093 | 31.726 | 6.9E-221 | 8.708E-218 | Batf          |
| ENSMUSG00000071551 | 32.469    | 2.957 | 0.566 | 5.229  | 1.7E-07  | 1.1853E-06 | Akr1c19       |
| ENSMUSG00000017002 | 12968.747 | 2.953 | 0.186 | 15.867 | 1.1E-56  | 7.2506E-55 | Slpi          |
| ENSMUSG00000083834 | 109.368   | 2.951 | 0.337 | 8.751  | 2.1E-18  | 3.4934E-17 | Gm12577       |
| ENSMUSG00000029780 | 16304.164 | 2.951 | 0.169 | 17.468 | 2.5E-68  | 2.3453E-66 | Nt5c3         |
| ENSMUSG00000116549 | 30.266    | 2.949 | 0.806 | 3.660  | 2.5E-04  | 0.00112    | Gm49728       |
| ENSMUSG00000086196 | 81.516    | 2.948 | 0.776 | 3.799  | 1.5E-04  | 0.00067265 | Gm13571       |
| ENSMUSG00000051276 | 18.673    | 2.946 | 0.603 | 4.883  | 1.0E-06  | 6.5492E-06 | Actrt2        |
| ENSMUSG00000031297 | 43.379    | 2.945 | 0.851 | 3.462  | 5.4E-04  | 0.00223939 | Slc7a3        |
| ENSMUSG00000101024 | 19.179    | 2.945 | 0.690 | 4.266  | 2.0E-05  | 0.00010511 | Gm5692        |
| ENSMUSG00000020182 | 21.136    | 2.942 | 1.050 | 2.801  | 5.1E-03  | 0.01735672 | Ddc           |
| ENSMUSG00000037321 | 33510.307 | 2.939 | 0.261 | 11.257 | 2.1E-29  | 5.8921E-28 | Tap1          |

|                    |            |       |       |        |          |            |               |
|--------------------|------------|-------|-------|--------|----------|------------|---------------|
| ENSMUSG00000102269 | 7.444      | 2.939 | 0.926 | 3.172  | 1.5E-03  | 0.00580631 | Gm7357        |
| ENSMUSG00000050957 | 1979.821   | 2.938 | 0.190 | 15.489 | 4.1E-54  | 2.5677E-52 | Ins16         |
| ENSMUSG00000111337 | 64.042     | 2.934 | 0.408 | 7.194  | 6.3E-13  | 7.2509E-12 | Gm6885        |
| ENSMUSG00000070524 | 370.416    | 2.934 | 0.385 | 7.623  | 2.5E-14  | 3.1465E-13 | Fer1b         |
| ENSMUSG00000025888 | 20102.945  | 2.932 | 0.159 | 18.495 | 2.3E-76  | 2.4469E-74 | Casp1         |
| ENSMUSG00000090468 | 4.471      | 2.924 | 1.052 | 2.779  | 5.5E-03  | 0.01844271 | Gm2840        |
| ENSMUSG00000028039 | 16.150     | 2.922 | 0.972 | 3.006  | 2.6E-03  | 0.00964335 | Efna3         |
| ENSMUSG00000069874 | 10705.208  | 2.918 | 0.331 | 8.816  | 1.2E-18  | 1.9962E-17 | Irgm2         |
| ENSMUSG00000043629 | 10.910     | 2.917 | 1.209 | 2.413  | 1.6E-02  | 0.0468615  | 1700019D03Rik |
| ENSMUSG00000073529 | 476.250    | 2.916 | 0.349 | 8.358  | 6.4E-17  | 9.6256E-16 | F830208F22Rik |
| ENSMUSG00000099470 | 207.066    | 2.915 | 0.424 | 6.878  | 6.1E-12  | 6.4165E-11 | Gm29340       |
| ENSMUSG00000028100 | 302.746    | 2.912 | 0.295 | 9.860  | 6.2E-23  | 1.2984E-21 | Nudt17        |
| ENSMUSG00000042349 | 14184.441  | 2.907 | 0.145 | 20.057 | 1.8E-89  | 2.6447E-87 | Ikbke         |
| ENSMUSG00000051910 | 7.487      | 2.899 | 1.073 | 2.702  | 6.9E-03  | 0.0226217  | Sox6          |
| ENSMUSG00000029603 | 61.685     | 2.899 | 0.929 | 3.119  | 1.8E-03  | 0.0068458  | Dtx1          |
| ENSMUSG00000082361 | 20.265     | 2.894 | 0.972 | 2.978  | 2.9E-03  | 0.01047761 | Btc           |
| ENSMUSG00000017009 | 141088.235 | 2.890 | 0.130 | 22.184 | 4.9E-109 | 1.064E-106 | Sdc4          |
| ENSMUSG00000029084 | 30127.643  | 2.888 | 0.106 | 27.189 | 8.8E-163 | 5.73E-160  | Cd38          |
| ENSMUSG00000115961 | 12.071     | 2.888 | 1.182 | 2.443  | 1.5E-02  | 0.04357214 | Gm41409       |
| ENSMUSG00000115338 | 5166.057   | 2.884 | 0.177 | 16.321 | 7.0E-60  | 5.1021E-58 | Pnp           |
| ENSMUSG00000053395 | 9.347      | 2.883 | 1.035 | 2.785  | 5.3E-03  | 0.01811743 | Cacng8        |
| ENSMUSG00000048621 | 2447.027   | 2.883 | 0.133 | 21.690 | 2.6E-104 | 5.053E-102 | Gm6377        |
| ENSMUSG00000032515 | 1269.367   | 2.883 | 0.228 | 12.626 | 1.5E-36  | 5.4987E-35 | Csrnp1        |
| ENSMUSG00000061561 | 4.829      | 2.881 | 1.108 | 2.601  | 9.3E-03  | 0.02932395 | Olfir373      |
| ENSMUSG00000097111 | 92.523     | 2.880 | 0.403 | 7.147  | 8.8E-13  | 9.9852E-12 | Peak1os       |
| ENSMUSG00000092277 | 149.204    | 2.876 | 0.289 | 9.938  | 2.9E-23  | 6.0707E-22 | Gm19684       |
| ENSMUSG00000097194 | 663.724    | 2.871 | 0.336 | 8.550  | 1.2E-17  | 1.9438E-16 | 9330175E14Rik |
| ENSMUSG00000037754 | 210.528    | 2.868 | 0.354 | 8.110  | 5.1E-16  | 7.1931E-15 | Ppp1r16b      |
| ENSMUSG00000036469 | 7023.213   | 2.868 | 0.132 | 21.772 | 4.2E-105 | 8.433E-103 | Marchfl       |
| ENSMUSG00000035373 | 61040.529  | 2.867 | 0.358 | 7.999  | 1.3E-15  | 1.7278E-14 | Ccl7          |
| ENSMUSG00000002307 | 19027.105  | 2.866 | 0.218 | 13.157 | 1.5E-39  | 6.248E-38  | Daxx          |
| ENSMUSG00000028362 | 147.474    | 2.866 | 0.648 | 4.425  | 9.7E-06  | 5.362E-05  | Tnfsf8        |
| ENSMUSG00000028773 | 1092.077   | 2.865 | 0.162 | 17.741 | 2.0E-70  | 1.9452E-68 | Fabp3         |
| ENSMUSG00000008393 | 6424.282   | 2.865 | 0.166 | 17.255 | 1.0E-66  | 9.2704E-65 | Carhsp1       |
| ENSMUSG00000117239 | 314.900    | 2.862 | 0.284 | 10.067 | 7.8E-24  | 1.6931E-22 | Gpr31c        |
| ENSMUSG00000099631 | 9.105      | 2.860 | 0.980 | 2.919  | 3.5E-03  | 0.01243343 | Gm8641        |
| ENSMUSG00000114055 | 251.369    | 2.856 | 0.235 | 12.172 | 4.4E-34  | 1.4547E-32 | Gm32089       |
| ENSMUSG00000001168 | 8.452      | 2.854 | 1.179 | 2.421  | 1.5E-02  | 0.04590674 | Oas1h         |
| ENSMUSG00000028885 | 995.598    | 2.849 | 0.198 | 14.390 | 6.0E-47  | 3.0113E-45 | Smpd13b       |
| ENSMUSG00000037921 | 11911.034  | 2.845 | 0.465 | 6.125  | 9.1E-10  | 8.0208E-09 | Ddx60         |
| ENSMUSG00000044434 | 113.277    | 2.845 | 0.275 | 10.347 | 4.3E-25  | 9.8572E-24 | Gm9791        |
| ENSMUSG00000029009 | 9866.910   | 2.844 | 0.282 | 10.070 | 7.5E-24  | 1.6365E-22 | Mthfr         |
| ENSMUSG00000048251 | 34.338     | 2.844 | 0.928 | 3.066  | 2.2E-03  | 0.00806794 | Bcl11b        |
| ENSMUSG00000089791 | 5.061      | 2.837 | 1.033 | 2.746  | 6.0E-03  | 0.02014509 | Gm3555        |
| ENSMUSG00000025324 | 1826.042   | 2.836 | 0.197 | 14.405 | 4.8E-47  | 2.4468E-45 | Atp10a        |
| ENSMUSG00000025225 | 15232.532  | 2.834 | 0.120 | 23.523 | 2.4E-122 | 7.66E-120  | Nfkb2         |
| ENSMUSG00000082744 | 17.121     | 2.833 | 0.719 | 3.941  | 8.1E-05  | 0.00039055 | Gm15625       |
| ENSMUSG00000028480 | 7765.075   | 2.832 | 0.145 | 19.522 | 7.1E-85  | 9.2299E-83 | Glipr2        |
| ENSMUSG00000117008 | 12.845     | 2.831 | 1.046 | 2.706  | 6.8E-03  | 0.02239418 | Gm49817       |
| ENSMUSG00000033470 | 481.934    | 2.831 | 0.287 | 9.877  | 5.2E-23  | 1.1033E-21 | Cysltr2       |
| ENSMUSG00000000184 | 13037.951  | 2.827 | 0.108 | 26.254 | 6.4E-152 | 3.23E-149  | Ccnd2         |
| ENSMUSG00000000957 | 38104.275  | 2.826 | 0.107 | 26.298 | 2.0E-152 | 1.051E-149 | Mmp14         |

|                    |           |       |       |        |          |            |               |
|--------------------|-----------|-------|-------|--------|----------|------------|---------------|
| ENSMUSG0000005364  | 45.790    | 2.825 | 0.627 | 4.509  | 6.5E-06  | 3.7017E-05 | Il5ra         |
| ENSMUSG00000079455 | 20.036    | 2.824 | 0.575 | 4.908  | 9.2E-07  | 5.8116E-06 | Gm16026       |
| ENSMUSG00000062310 | 154.064   | 2.822 | 0.498 | 5.663  | 1.5E-08  | 1.1646E-07 | Glrp1         |
| ENSMUSG00000062960 | 516.213   | 2.820 | 0.252 | 11.201 | 4.0E-29  | 1.0951E-27 | Kdr           |
| ENSMUSG00000069844 | 2471.935  | 2.819 | 0.185 | 15.253 | 1.6E-52  | 9.372E-51  | Sco1          |
| ENSMUSG00000044309 | 785.061   | 2.814 | 0.203 | 13.839 | 1.5E-43  | 6.6834E-42 | Apol7c        |
| ENSMUSG00000050919 | 66.248    | 2.814 | 0.777 | 3.623  | 2.9E-04  | 0.00127888 | Zfp366        |
| ENSMUSG00000084143 | 10.648    | 2.812 | 1.067 | 2.635  | 8.4E-03  | 0.02693809 | Gm13400       |
| ENSMUSG00000081650 | 50.078    | 2.808 | 0.515 | 5.448  | 5.1E-08  | 3.7677E-07 | Gm16181       |
| ENSMUSG00000009376 | 2408.387  | 2.807 | 0.181 | 15.543 | 1.8E-54  | 1.1044E-52 | Met           |
| ENSMUSG00000097077 | 212.398   | 2.807 | 0.300 | 9.359  | 8.0E-21  | 1.5162E-19 | Gm16712       |
| ENSMUSG00000019850 | 15553.224 | 2.806 | 0.133 | 21.038 | 2.9E-98  | 5.0242E-96 | Tnfaip3       |
| ENSMUSG00000027078 | 18307.313 | 2.804 | 0.295 | 9.507  | 2.0E-21  | 3.8223E-20 | Ube2l6        |
| ENSMUSG00000030109 | 164.168   | 2.800 | 0.525 | 5.329  | 9.9E-08  | 7.0685E-07 | Slc6a12       |
| ENSMUSG00000034485 | 559.465   | 2.797 | 0.327 | 8.557  | 1.2E-17  | 1.8405E-16 | Uaca          |
| ENSMUSG00000021025 | 79496.173 | 2.797 | 0.081 | 34.631 | 8.6E-263 | 2.309E-259 | Nfkbia        |
| ENSMUSG00000031494 | 22.542    | 2.795 | 1.118 | 2.501  | 1.2E-02  | 0.03777277 | Cd209a        |
| ENSMUSG00000030187 | 1020.769  | 2.793 | 0.189 | 14.740 | 3.6E-49  | 1.9453E-47 | Klra2         |
| ENSMUSG00000040296 | 13833.729 | 2.792 | 0.374 | 7.474  | 7.8E-14  | 9.5449E-13 | Ddx58         |
| ENSMUSG00000008496 | 3259.478  | 2.792 | 0.147 | 18.944 | 5.0E-80  | 5.8139E-78 | Pou2f2        |
| ENSMUSG00000048534 | 323.150   | 2.791 | 0.426 | 6.547  | 5.9E-11  | 5.735E-10  | Jaml          |
| ENSMUSG00000080892 | 4.997     | 2.788 | 1.129 | 2.469  | 1.4E-02  | 0.04083085 | Gm9266        |
| ENSMUSG00000000791 | 1037.668  | 2.780 | 0.304 | 9.136  | 6.5E-20  | 1.17E-18   | Il12rb1       |
| ENSMUSG00000031652 | 7021.529  | 2.779 | 0.124 | 22.500 | 4.1E-112 | 9.591E-110 | N4bp1         |
| ENSMUSG00000018500 | 9072.022  | 2.778 | 0.122 | 22.823 | 2.7E-115 | 7.063E-113 | Adora2b       |
| ENSMUSG00000073555 | 7195.924  | 2.777 | 0.540 | 5.140  | 2.7E-07  | 1.855E-06  | Gm4951        |
| ENSMUSG00000003283 | 38723.430 | 2.776 | 0.121 | 22.958 | 1.2E-116 | 3.289E-114 | Hck           |
| ENSMUSG00000097305 | 27.454    | 2.776 | 0.662 | 4.195  | 2.7E-05  | 0.00014133 | Gm17276       |
| ENSMUSG00000026893 | 2326.068  | 2.776 | 0.130 | 21.279 | 1.8E-100 | 3.2321E-98 | Gca           |
| ENSMUSG00000042333 | 1377.980  | 2.775 | 0.159 | 17.477 | 2.1E-68  | 2.0108E-66 | Tnfrsf14      |
| ENSMUSG00000106990 | 1012.389  | 2.775 | 0.191 | 14.564 | 4.8E-48  | 2.4703E-46 | Gm42547       |
| ENSMUSG00000106959 | 164.192   | 2.775 | 0.554 | 5.009  | 5.5E-07  | 3.5572E-06 | Gm42548       |
| ENSMUSG00000104969 | 339.825   | 2.774 | 0.236 | 11.738 | 8.1E-32  | 2.4479E-30 | Gm43445       |
| ENSMUSG00000086860 | 11.534    | 2.772 | 0.930 | 2.979  | 2.9E-03  | 0.01046251 | Gm1720        |
| ENSMUSG00000087684 | 99.974    | 2.768 | 0.458 | 6.050  | 1.5E-09  | 1.2596E-08 | 1200007C13Rik |
| ENSMUSG00000031595 | 76.720    | 2.768 | 0.775 | 3.573  | 3.5E-04  | 0.0015219  | Pdgfrl        |
| ENSMUSG00000099775 | 309.701   | 2.765 | 0.276 | 10.004 | 1.5E-23  | 3.1691E-22 | Gm5960        |
| ENSMUSG00000060509 | 292.425   | 2.764 | 0.325 | 8.492  | 2.0E-17  | 3.1631E-16 | Xcr1          |
| ENSMUSG00000095620 | 36.259    | 2.763 | 0.496 | 5.570  | 2.6E-08  | 1.9489E-07 | Csta2         |
| ENSMUSG00000002227 | 6471.341  | 2.762 | 0.348 | 7.940  | 2.0E-15  | 2.7373E-14 | Mov10         |
| ENSMUSG00000051504 | 524.669   | 2.761 | 0.192 | 14.374 | 7.6E-47  | 3.774E-45  | Siglech       |
| ENSMUSG00000022876 | 6362.477  | 2.758 | 0.089 | 30.868 | 3.2E-209 | 3.197E-206 | Samsn1        |
| ENSMUSG00000036912 | 78.717    | 2.758 | 0.766 | 3.600  | 3.2E-04  | 0.00138513 | Piwil4        |
| ENSMUSG00000114235 | 25.254    | 2.754 | 0.721 | 3.822  | 1.3E-04  | 0.00061714 | F530104D19Rik |
| ENSMUSG00000106976 | 38.019    | 2.754 | 0.851 | 3.236  | 1.2E-03  | 0.00472823 | Gm42963       |
| ENSMUSG00000039200 | 10.241    | 2.752 | 1.153 | 2.388  | 1.7E-02  | 0.04969834 | Atf7ip2       |
| ENSMUSG00000040483 | 14880.930 | 2.752 | 0.375 | 7.329  | 2.3E-13  | 2.767E-12  | Xaf1          |
| ENSMUSG00000038132 | 14.271    | 2.750 | 1.098 | 2.504  | 1.2E-02  | 0.03748382 | Rbm24         |
| ENSMUSG00000102374 | 25.440    | 2.747 | 0.695 | 3.953  | 7.7E-05  | 0.00037313 | Gm38387       |
| ENSMUSG00000078153 | 1255.073  | 2.744 | 0.168 | 16.324 | 6.7E-60  | 4.9456E-58 | Psme2b        |
| ENSMUSG00000020134 | 15464.521 | 2.742 | 0.126 | 21.844 | 8.9E-106 | 1.813E-103 | Peli1         |
| ENSMUSG00000117922 | 14.612    | 2.741 | 1.126 | 2.434  | 1.5E-02  | 0.04445673 | Gm50397       |

|                    |           |       |       |        |          |            |               |
|--------------------|-----------|-------|-------|--------|----------|------------|---------------|
| ENSMUSG00000032278 | 40.907    | 2.741 | 0.547 | 5.007  | 5.5E-07  | 3.5751E-06 | Paqr5         |
| ENSMUSG00000029392 | 1951.572  | 2.739 | 0.217 | 12.634 | 1.4E-36  | 4.9666E-35 | Rilpl1        |
| ENSMUSG00000032596 | 7634.128  | 2.738 | 0.216 | 12.692 | 6.6E-37  | 2.4261E-35 | Uba7          |
| ENSMUSG00000106734 | 7310.713  | 2.735 | 0.330 | 8.286  | 1.2E-16  | 1.7346E-15 | Gm20559       |
| ENSMUSG00000021725 | 2415.376  | 2.734 | 0.158 | 17.332 | 2.7E-67  | 2.4665E-65 | Parp8         |
| ENSMUSG00000103457 | 34.567    | 2.734 | 0.679 | 4.026  | 5.7E-05  | 0.00028087 | Gm37042       |
| ENSMUSG00000058046 | 87.211    | 2.734 | 0.428 | 6.390  | 1.7E-10  | 1.5681E-09 | 4933430I17Rik |
| ENSMUSG00000085152 | 16.157    | 2.732 | 0.773 | 3.534  | 4.1E-04  | 0.00174733 | Gm11496       |
| ENSMUSG00000091191 | 1767.822  | 2.724 | 0.221 | 12.343 | 5.3E-35  | 1.8178E-33 | Gm17334       |
| ENSMUSG00000046748 | 27.833    | 2.719 | 1.114 | 2.441  | 1.5E-02  | 0.0437167  | Tmem45a2      |
| ENSMUSG00000031897 | 23656.888 | 2.718 | 0.119 | 22.914 | 3.4E-116 | 8.855E-114 | Psmb10        |
| ENSMUSG00000020057 | 8578.408  | 2.716 | 0.122 | 22.287 | 4.9E-110 | 1.1E-107   | Dram1         |
| ENSMUSG00000015312 | 16563.720 | 2.714 | 0.146 | 18.638 | 1.6E-77  | 1.7707E-75 | Gadd45b       |
| ENSMUSG00000104876 | 22.291    | 2.712 | 1.096 | 2.474  | 1.3E-02  | 0.04035678 | Trdc          |
| ENSMUSG00000108332 | 6.734     | 2.710 | 0.936 | 2.895  | 3.8E-03  | 0.01331079 | D530033B14Rik |
| ENSMUSG00000097149 | 17.717    | 2.706 | 0.919 | 2.944  | 3.2E-03  | 0.01159392 | G630030J09Rik |
| ENSMUSG00000103907 | 41.596    | 2.706 | 0.747 | 3.623  | 2.9E-04  | 0.00127793 | Gm37498       |
| ENSMUSG00000086589 | 9.279     | 2.704 | 1.034 | 2.614  | 8.9E-03  | 0.02836057 | Gm12915       |
| ENSMUSG00000030203 | 2352.722  | 2.692 | 0.117 | 22.969 | 9.4E-117 | 2.578E-114 | Dusp16        |
| ENSMUSG00000076441 | 10673.222 | 2.692 | 0.169 | 15.910 | 5.4E-57  | 3.7302E-55 | Ass1          |
| ENSMUSG00000022548 | 100.229   | 2.690 | 0.516 | 5.216  | 1.8E-07  | 1.2659E-06 | Apod          |
| ENSMUSG00000025059 | 3546.392  | 2.683 | 0.138 | 19.439 | 3.6E-84  | 4.5572E-82 | Gk            |
| ENSMUSG00000035208 | 11674.918 | 2.681 | 0.384 | 6.977  | 3.0E-12  | 3.2768E-11 | Slnf8         |
| ENSMUSG00000040405 | 32.666    | 2.678 | 0.849 | 3.153  | 1.6E-03  | 0.00616184 | Havcr1        |
| ENSMUSG00000102055 | 19.641    | 2.675 | 0.657 | 4.068  | 4.7E-05  | 0.00023708 | Gm28913       |
| ENSMUSG00000024164 | 19259.649 | 2.674 | 0.102 | 26.269 | 4.3E-152 | 2.199E-149 | C3            |
| ENSMUSG00000027827 | 192.754   | 2.672 | 0.290 | 9.199  | 3.6E-20  | 6.5551E-19 | Kcnab1        |
| ENSMUSG00000066861 | 7114.514  | 2.672 | 0.366 | 7.300  | 2.9E-13  | 3.4028E-12 | Oas1g         |
| ENSMUSG00000037991 | 228.440   | 2.671 | 0.334 | 7.990  | 1.4E-15  | 1.8551E-14 | Rmi2          |
| ENSMUSG00000054892 | 99.475    | 2.670 | 0.530 | 5.036  | 4.8E-07  | 3.1064E-06 | Txk           |
| ENSMUSG00000037731 | 22962.169 | 2.669 | 0.213 | 12.542 | 4.4E-36  | 1.5745E-34 | Themis2       |
| ENSMUSG00000025887 | 506.889   | 2.665 | 0.270 | 9.869  | 5.7E-23  | 1.1968E-21 | Casp12        |
| ENSMUSG00000118258 | 49.492    | 2.662 | 0.579 | 4.596  | 4.3E-06  | 2.5101E-05 | Gm19076       |
| ENSMUSG00000085771 | 158.162   | 2.662 | 0.423 | 6.291  | 3.1E-10  | 2.9062E-09 | C230066G23Rik |
| ENSMUSG00000030162 | 1583.817  | 2.659 | 0.213 | 12.469 | 1.1E-35  | 3.8645E-34 | Olr1          |
| ENSMUSG00000115160 | 4.560     | 2.658 | 1.020 | 2.604  | 9.2E-03  | 0.02906541 | Gm6532        |
| ENSMUSG00000050533 | 46.410    | 2.650 | 0.459 | 5.768  | 8.0E-09  | 6.4436E-08 | Gm9845        |
| ENSMUSG00000056290 | 669.598   | 2.648 | 0.242 | 10.939 | 7.5E-28  | 1.941E-26  | Ms4a4b        |
| ENSMUSG00000096727 | 15111.486 | 2.644 | 0.173 | 15.305 | 7.1E-53  | 4.2484E-51 | Psmb9         |
| ENSMUSG00000002797 | 1436.136  | 2.643 | 0.128 | 20.590 | 3.3E-94  | 5.3636E-92 | Gget          |
| ENSMUSG00000024472 | 3712.308  | 2.642 | 0.190 | 13.935 | 3.9E-44  | 1.795E-42  | Dcp2          |
| ENSMUSG00000031428 | 34.182    | 2.640 | 1.102 | 2.396  | 1.7E-02  | 0.04879443 | Zcchc18       |
| ENSMUSG00000091573 | 11.930    | 2.637 | 1.035 | 2.547  | 1.1E-02  | 0.03368659 | Serpina3d-ps  |
| ENSMUSG00000022584 | 44001.916 | 2.633 | 0.106 | 24.897 | 8.1E-137 | 3.072E-134 | Ly6c2         |
| ENSMUSG00000104985 | 14.200    | 2.632 | 0.730 | 3.607  | 3.1E-04  | 0.00135235 | Gm42917       |
| ENSMUSG00000045868 | 205.956   | 2.631 | 0.313 | 8.411  | 4.1E-17  | 6.2033E-16 | Gvin1         |
| ENSMUSG00000024014 | 7064.345  | 2.627 | 0.137 | 19.203 | 3.5E-82  | 4.2786E-80 | Pim1          |
| ENSMUSG00000079499 | 1367.570  | 2.626 | 0.181 | 14.472 | 1.8E-47  | 9.3475E-46 | 6530402F18Rik |
| ENSMUSG00000096883 | 41.733    | 2.624 | 0.821 | 3.196  | 1.4E-03  | 0.00537977 | Shisa8        |
| ENSMUSG00000082057 | 13.528    | 2.624 | 1.084 | 2.421  | 1.5E-02  | 0.04594777 | Gm15789       |
| ENSMUSG00000075602 | 22006.743 | 2.623 | 0.534 | 4.911  | 9.1E-07  | 5.7435E-06 | Ly6a          |
| ENSMUSG00000055413 | 2891.360  | 2.623 | 0.244 | 10.733 | 7.1E-27  | 1.7524E-25 | H2-Q5         |



|                    |           |       |       |        |          |            |               |
|--------------------|-----------|-------|-------|--------|----------|------------|---------------|
| ENSMUSG00000038213 | 5582.735  | 2.623 | 0.131 | 20.023 | 3.4E-89  | 5.0711E-87 | Tapbp1        |
| ENSMUSG00000026656 | 22597.505 | 2.619 | 0.100 | 26.147 | 1.1E-150 | 5.134E-148 | Fcgr2b        |
| ENSMUSG00000047735 | 11526.506 | 2.614 | 0.272 | 9.622  | 6.5E-22  | 1.286E-20  | Samd9l        |
| ENSMUSG00000039232 | 9074.622  | 2.611 | 0.134 | 19.557 | 3.6E-85  | 4.7483E-83 | Stx11         |
| ENSMUSG00000026821 | 7654.760  | 2.611 | 0.146 | 17.898 | 1.2E-71  | 1.2041E-69 | Ralgds        |
| ENSMUSG00000024679 | 58596.040 | 2.610 | 0.123 | 21.258 | 2.8E-100 | 5.0947E-98 | Ms4a6d        |
| ENSMUSG00000045322 | 188.968   | 2.606 | 0.575 | 4.529  | 5.9E-06  | 3.382E-05  | Tlr9          |
| ENSMUSG00000038668 | 2936.812  | 2.605 | 0.147 | 17.736 | 2.2E-70  | 2.135E-68  | Lpar1         |
| ENSMUSG00000082534 | 9.192     | 2.602 | 0.938 | 2.774  | 5.5E-03  | 0.01868766 | Gm13712       |
| ENSMUSG00000043323 | 2462.239  | 2.601 | 0.408 | 6.375  | 1.8E-10  | 1.7201E-09 | Fbrs1l        |
| ENSMUSG00000063286 | 12376.475 | 2.600 | 0.173 | 15.024 | 5.1E-51  | 2.9057E-49 | Gvin-ps7      |
| ENSMUSG00000022014 | 9486.962  | 2.600 | 0.283 | 9.181  | 4.3E-20  | 7.7306E-19 | Epsti1        |
| ENSMUSG00000043340 | 61.903    | 2.599 | 0.586 | 4.439  | 9.0E-06  | 5.0473E-05 | 6530409C15Rik |
| ENSMUSG00000035385 | 34004.653 | 2.598 | 0.183 | 14.170 | 1.4E-45  | 6.7957E-44 | Ccl2          |
| ENSMUSG00000036019 | 169.529   | 2.597 | 0.413 | 6.285  | 3.3E-10  | 3.0264E-09 | Tmtc2         |
| ENSMUSG00000041449 | 21.412    | 2.596 | 0.830 | 3.125  | 1.8E-03  | 0.00670592 | Serpina3h     |
| ENSMUSG00000047048 | 27.237    | 2.594 | 0.973 | 2.666  | 7.7E-03  | 0.02484002 | Olf432        |
| ENSMUSG00000025429 | 4109.219  | 2.590 | 0.096 | 27.065 | 2.5E-161 | 1.566E-158 | Pstpip2       |
| ENSMUSG00000068227 | 526.513   | 2.588 | 0.355 | 7.297  | 2.9E-13  | 3.484E-12  | Il2rb         |
| ENSMUSG00000050844 | 14.336    | 2.588 | 1.084 | 2.387  | 1.7E-02  | 0.04981284 | 1700020N01Rik |
| ENSMUSG00000045827 | 3443.069  | 2.587 | 0.179 | 14.480 | 1.6E-47  | 8.3531E-46 | Serpib9       |
| ENSMUSG0000009569  | 36.177    | 2.586 | 0.700 | 3.692  | 2.2E-04  | 0.00099439 | Gm18301       |
| ENSMUSG00000018569 | 27.635    | 2.586 | 1.019 | 2.537  | 1.1E-02  | 0.03451757 | Cldn7         |
| ENSMUSG00000019082 | 11554.681 | 2.584 | 0.185 | 13.994 | 1.7E-44  | 7.9168E-43 | Slc25a22      |
| ENSMUSG00000114380 | 15.400    | 2.582 | 0.563 | 4.583  | 4.6E-06  | 2.6574E-05 | Gm47942       |
| ENSMUSG00000050578 | 53741.490 | 2.582 | 0.201 | 12.864 | 7.2E-38  | 2.7479E-36 | Mmp13         |
| ENSMUSG00000026104 | 9641.419  | 2.580 | 0.328 | 7.859  | 3.9E-15  | 5.187E-14  | Stat1         |
| ENSMUSG00000026031 | 12466.494 | 2.577 | 0.105 | 24.545 | 4.9E-133 | 1.803E-130 | Cflar         |
| ENSMUSG00000030137 | 543.489   | 2.575 | 0.290 | 8.885  | 6.4E-19  | 1.0877E-17 | Tuba8         |
| ENSMUSG00000039470 | 124.715   | 2.572 | 0.500 | 5.149  | 2.6E-07  | 1.7749E-06 | Zdhhc2        |
| ENSMUSG00000025911 | 187.573   | 2.572 | 0.316 | 8.136  | 4.1E-16  | 5.8497E-15 | Adhfe1        |
| ENSMUSG00000101144 | 17.755    | 2.572 | 0.942 | 2.732  | 6.3E-03  | 0.02091642 | Gm29054       |
| ENSMUSG00000037997 | 4245.795  | 2.571 | 0.218 | 11.781 | 4.9E-32  | 1.5076E-30 | Parp1l        |
| ENSMUSG00000036446 | 55.082    | 2.569 | 0.547 | 4.695  | 2.7E-06  | 1.5966E-05 | Lum           |
| ENSMUSG00000021614 | 2214.257  | 2.567 | 0.215 | 11.954 | 6.2E-33  | 1.981E-31  | Vcan          |
| ENSMUSG00000020395 | 136.807   | 2.566 | 0.396 | 6.478  | 9.3E-11  | 8.9284E-10 | Itk           |
| ENSMUSG00000059921 | 65.986    | 2.565 | 0.613 | 4.184  | 2.9E-05  | 0.00014777 | Unc5c         |
| ENSMUSG00000065591 | 6.013     | 2.564 | 1.065 | 2.408  | 1.6E-02  | 0.04730784 | Gm22753       |
| ENSMUSG00000032727 | 4411.320  | 2.564 | 0.158 | 16.222 | 3.6E-59  | 2.5559E-57 | Mier3         |
| ENSMUSG00000103219 | 84.958    | 2.563 | 0.337 | 7.610  | 2.7E-14  | 3.4599E-13 | Gm37787       |
| ENSMUSG00000030200 | 52.655    | 2.556 | 0.963 | 2.653  | 8.0E-03  | 0.02570871 | Bcl2l14       |
| ENSMUSG00000020785 | 185.791   | 2.555 | 0.398 | 6.424  | 1.3E-10  | 1.261E-09  | Camkk1        |
| ENSMUSG00000028859 | 9783.781  | 2.554 | 0.122 | 20.970 | 1.2E-97  | 2.092E-95  | Csf3r         |
| ENSMUSG00000094724 | 142.797   | 2.554 | 0.305 | 8.371  | 5.7E-17  | 8.6323E-16 | Rnaset2b      |
| ENSMUSG00000015968 | 1013.861  | 2.553 | 0.279 | 9.144  | 6.0E-20  | 1.0875E-18 | Cacna1d       |
| ENSMUSG00000038305 | 122.209   | 2.553 | 0.541 | 4.717  | 2.4E-06  | 1.4409E-05 | Spats2l       |
| ENSMUSG00000031292 | 64.590    | 2.552 | 0.417 | 6.115  | 9.6E-10  | 8.4827E-09 | Cdkl5         |
| ENSMUSG00000028894 | 5699.974  | 2.549 | 0.170 | 14.970 | 1.2E-50  | 6.5157E-49 | Inpp5b        |
| ENSMUSG00000026573 | 41.874    | 2.548 | 0.651 | 3.915  | 9.0E-05  | 0.00043209 | Xcl1          |
| ENSMUSG00000067610 | 13.716    | 2.547 | 0.982 | 2.594  | 9.5E-03  | 0.02980877 | Klri1         |
| ENSMUSG00000053101 | 5417.459  | 2.545 | 0.163 | 15.655 | 3.1E-55  | 1.9807E-53 | Gpr14l        |
| ENSMUSG00000046080 | 49.392    | 2.542 | 0.770 | 3.301  | 9.6E-04  | 0.00383203 | Clec9a        |

|                    |            |       |       |        |          |            |               |
|--------------------|------------|-------|-------|--------|----------|------------|---------------|
| ENSMUSG00000022218 | 206.565    | 2.537 | 0.378 | 6.719  | 1.8E-11  | 1.8641E-10 | Tgml          |
| ENSMUSG00000039783 | 193.003    | 2.536 | 0.695 | 3.651  | 2.6E-04  | 0.00115764 | Kmo           |
| ENSMUSG00000040033 | 18176.400  | 2.527 | 0.332 | 7.615  | 2.6E-14  | 3.3352E-13 | Stat2         |
| ENSMUSG00000034730 | 18.693     | 2.521 | 0.912 | 2.762  | 5.7E-03  | 0.01925395 | Adgrb1        |
| ENSMUSG00000062082 | 2335.572   | 2.519 | 0.162 | 15.576 | 1.1E-54  | 6.6807E-53 | Cd200r4       |
| ENSMUSG00000082088 | 310.639    | 2.519 | 0.217 | 11.633 | 2.8E-31  | 8.287E-30  | Gm15753       |
| ENSMUSG00000035458 | 24.544     | 2.518 | 0.826 | 3.049  | 2.3E-03  | 0.00848066 | Tnni3         |
| ENSMUSG00000062345 | 5228.435   | 2.516 | 0.290 | 8.662  | 4.6E-18  | 7.5156E-17 | Serpinb2      |
| ENSMUSG00000044244 | 95.785     | 2.511 | 0.465 | 5.397  | 6.8E-08  | 4.9447E-07 | Il20rb        |
| ENSMUSG00000118008 | 13.829     | 2.511 | 0.672 | 3.739  | 1.8E-04  | 0.00083823 | Gm36913       |
| ENSMUSG00000027669 | 5626.451   | 2.510 | 0.134 | 18.730 | 2.8E-78  | 3.195E-76  | Gnb4          |
| ENSMUSG00000038507 | 19606.620  | 2.508 | 0.216 | 11.588 | 4.8E-31  | 1.3964E-29 | Parp12        |
| ENSMUSG00000021997 | 44.023     | 2.507 | 0.599 | 4.185  | 2.8E-05  | 0.00014689 | Lrrc63        |
| ENSMUSG00000034422 | 8621.796   | 2.506 | 0.331 | 7.573  | 3.7E-14  | 4.5719E-13 | Parp14        |
| ENSMUSG00000026073 | 539.983    | 2.505 | 0.273 | 9.186  | 4.1E-20  | 7.3989E-19 | Il1r2         |
| ENSMUSG00000056145 | 352.558    | 2.504 | 0.317 | 7.895  | 2.9E-15  | 3.9181E-14 | AI504432      |
| ENSMUSG00000107928 | 8.385      | 2.502 | 0.927 | 2.700  | 6.9E-03  | 0.02275436 | Gm45140       |
| ENSMUSG00000106254 | 18.165     | 2.499 | 0.704 | 3.548  | 3.9E-04  | 0.00166449 | Gm42907       |
| ENSMUSG00000106962 | 125.416    | 2.496 | 0.414 | 6.023  | 1.7E-09  | 1.4749E-08 | Gm43633       |
| ENSMUSG00000027580 | 6219.417   | 2.496 | 0.328 | 7.617  | 2.6E-14  | 3.2739E-13 | Helz2         |
| ENSMUSG00000035493 | 21055.561  | 2.493 | 0.134 | 18.584 | 4.4E-77  | 4.8014E-75 | Tgfbf1        |
| ENSMUSG00000028965 | 463.488    | 2.490 | 0.298 | 8.363  | 6.1E-17  | 9.2348E-16 | Tnfrsf9       |
| ENSMUSG00000081769 | 377.401    | 2.486 | 0.186 | 13.347 | 1.2E-40  | 5.1293E-39 | Gm12216       |
| ENSMUSG00000032000 | 5358.438   | 2.483 | 0.130 | 19.167 | 6.9E-82  | 8.3152E-80 | Birc3         |
| ENSMUSG00000054598 | 120.119    | 2.482 | 0.502 | 4.950  | 7.4E-07  | 4.74E-06   | 9130230L23Rik |
| ENSMUSG00000027832 | 3125.484   | 2.481 | 0.146 | 16.993 | 9.2E-65  | 7.8714E-63 | Ptx3          |
| ENSMUSG00000024772 | 53173.010  | 2.480 | 0.097 | 25.582 | 2.4E-144 | 1.048E-141 | Ehd1          |
| ENSMUSG00000032691 | 6364.068   | 2.480 | 0.125 | 19.777 | 4.7E-87  | 6.6132E-85 | Nlrp3         |
| ENSMUSG00000079197 | 22554.033  | 2.478 | 0.110 | 22.440 | 1.6E-111 | 3.672E-109 | Psme2         |
| ENSMUSG00000070034 | 6632.234   | 2.476 | 0.208 | 11.910 | 1.0E-32  | 3.3044E-31 | Sp110         |
| ENSMUSG00000047067 | 897.552    | 2.475 | 0.186 | 13.287 | 2.7E-40  | 1.1287E-38 | Dusp28        |
| ENSMUSG00000117074 | 232.994    | 2.474 | 0.289 | 8.562  | 1.1E-17  | 1.7593E-16 | Gm49925       |
| ENSMUSG00000054580 | 122.163    | 2.472 | 0.441 | 5.599  | 2.2E-08  | 1.6571E-07 | Pla2r1        |
| ENSMUSG00000041736 | 60560.610  | 2.472 | 0.121 | 20.508 | 1.8E-93  | 2.8744E-91 | Tspo          |
| ENSMUSG00000029648 | 300.132    | 2.471 | 0.397 | 6.220  | 5.0E-10  | 4.4786E-09 | Flt1          |
| ENSMUSG00000107215 | 39.184     | 2.468 | 0.657 | 3.759  | 1.7E-04  | 0.00078065 | Gm43197       |
| ENSMUSG00000111713 | 38.082     | 2.468 | 0.603 | 4.091  | 4.3E-05  | 0.00021601 | Gm20234       |
| ENSMUSG00000097558 | 56.375     | 2.468 | 0.613 | 4.023  | 5.7E-05  | 0.00028421 | Gm26902       |
| ENSMUSG00000020599 | 80.434     | 2.467 | 0.348 | 7.089  | 1.4E-12  | 1.5099E-11 | Rgs9          |
| ENSMUSG00000030595 | 14097.895  | 2.462 | 0.126 | 19.605 | 1.4E-85  | 1.8585E-83 | Nfkbib        |
| ENSMUSG00000042256 | 68.639     | 2.462 | 0.810 | 3.039  | 2.4E-03  | 0.0087222  | Ptchd4        |
| ENSMUSG00000068631 | 36.601     | 2.459 | 0.482 | 5.106  | 3.3E-07  | 2.1944E-06 | Gm7676        |
| ENSMUSG00000035934 | 25.137     | 2.457 | 1.028 | 2.389  | 1.7E-02  | 0.04956901 | Pknox2        |
| ENSMUSG00000028214 | 1063.468   | 2.457 | 0.220 | 11.187 | 4.7E-29  | 1.2799E-27 | Gem           |
| ENSMUSG00000053835 | 4532.715   | 2.456 | 0.321 | 7.661  | 1.8E-14  | 2.342E-13  | H2-T24        |
| ENSMUSG00000037860 | 1795.908   | 2.454 | 0.172 | 14.279 | 3.0E-46  | 1.4529E-44 | Aim2          |
| ENSMUSG00000054822 | 60.270     | 2.453 | 0.770 | 3.187  | 1.4E-03  | 0.00553224 | 1700041G16Rik |
| ENSMUSG00000030560 | 158879.838 | 2.452 | 0.132 | 18.605 | 2.9E-77  | 3.2672E-75 | Ctsc          |
| ENSMUSG00000051748 | 5618.674   | 2.450 | 0.215 | 11.417 | 3.5E-30  | 9.8241E-29 | Wfdc21        |
| ENSMUSG00000115946 | 133.888    | 2.447 | 0.359 | 6.818  | 9.2E-12  | 9.6209E-11 | Mirt2         |
| ENSMUSG00000107723 | 15.842     | 2.447 | 0.613 | 3.991  | 6.6E-05  | 0.00032277 | Gm43964       |
| ENSMUSG00000052485 | 4352.611   | 2.446 | 0.231 | 10.596 | 3.1E-26  | 7.4749E-25 | Tmem171       |

|                    |           |       |       |        |         |            |               |
|--------------------|-----------|-------|-------|--------|---------|------------|---------------|
| ENSMUSG00000097166 | 17.390    | 2.446 | 0.988 | 2.476  | 1.3E-02 | 0.04016908 | 9330179D12Rik |
| ENSMUSG00000022906 | 7634.284  | 2.438 | 0.288 | 8.481  | 2.2E-17 | 3.4501E-16 | Parp9         |
| ENSMUSG00000097439 | 61.395    | 2.436 | 0.488 | 4.995  | 5.9E-07 | 3.7987E-06 | Gm16754       |
| ENSMUSG00000054728 | 110.673   | 2.432 | 0.334 | 7.272  | 3.5E-13 | 4.1532E-12 | Phactr1       |
| ENSMUSG00000031628 | 6673.910  | 2.430 | 0.149 | 16.352 | 4.2E-60 | 3.1243E-58 | Casp3         |
| ENSMUSG00000032661 | 17232.195 | 2.428 | 0.477 | 5.087  | 3.6E-07 | 2.4192E-06 | Oas3          |
| ENSMUSG00000102606 | 13.214    | 2.427 | 0.804 | 3.020  | 2.5E-03 | 0.00924759 | Rpl21-ps1     |
| ENSMUSG00000031155 | 895.263   | 2.427 | 0.261 | 9.293  | 1.5E-20 | 2.7913E-19 | Pim2          |
| ENSMUSG00000051727 | 99.206    | 2.426 | 0.562 | 4.317  | 1.6E-05 | 8.4844E-05 | Kctd14        |
| ENSMUSG00000070997 | 45.104    | 2.426 | 0.614 | 3.953  | 7.7E-05 | 0.00037308 | 1700055D18Rik |
| ENSMUSG00000043432 | 1109.061  | 2.425 | 0.215 | 11.269 | 1.9E-29 | 5.1949E-28 | Leng9         |
| ENSMUSG00000096351 | 25.657    | 2.423 | 1.015 | 2.387  | 1.7E-02 | 0.04982334 | Samd11        |
| ENSMUSG00000044576 | 68.583    | 2.422 | 0.447 | 5.417  | 6.1E-08 | 4.4513E-07 | Garem2        |
| ENSMUSG00000106108 | 26.019    | 2.408 | 0.949 | 2.538  | 1.1E-02 | 0.03446761 | Gm43221       |
| ENSMUSG00000049892 | 177.167   | 2.405 | 0.461 | 5.212  | 1.9E-07 | 1.2906E-06 | Rasd1         |
| ENSMUSG00000094347 | 15.180    | 2.402 | 0.658 | 3.653  | 2.6E-04 | 0.00115023 | Olfir784      |
| ENSMUSG00000073489 | 30473.048 | 2.401 | 0.343 | 6.994  | 2.7E-12 | 2.9296E-11 | Ifi204        |
| ENSMUSG00000045065 | 194.318   | 2.401 | 0.260 | 9.224  | 2.9E-20 | 5.2198E-19 | 9930022D16Rik |
| ENSMUSG00000027737 | 12844.707 | 2.400 | 0.176 | 13.611 | 3.4E-42 | 1.5208E-40 | Slc7a11       |
| ENSMUSG00000044162 | 26085.122 | 2.398 | 0.158 | 15.208 | 3.1E-52 | 1.8246E-50 | Tnip3         |
| ENSMUSG00000026482 | 14246.008 | 2.398 | 0.142 | 16.830 | 1.5E-63 | 1.2015E-61 | Rgl1          |
| ENSMUSG00000071640 | 30.392    | 2.397 | 0.521 | 4.604  | 4.2E-06 | 2.4269E-05 | Stxbp3-ps     |
| ENSMUSG00000013415 | 76.377    | 2.397 | 0.487 | 4.917  | 8.8E-07 | 5.5667E-06 | Igf2bp1       |
| ENSMUSG00000047509 | 9.782     | 2.395 | 0.763 | 3.141  | 1.7E-03 | 0.00639059 | Gm6776        |
| ENSMUSG00000000983 | 62.717    | 2.395 | 0.456 | 5.252  | 1.5E-07 | 1.0529E-06 | Wfdc18        |
| ENSMUSG00000000409 | 263.826   | 2.394 | 0.422 | 5.668  | 1.4E-08 | 1.135E-07  | Lck           |
| ENSMUSG00000039697 | 3861.295  | 2.390 | 0.138 | 17.266 | 8.5E-67 | 7.6358E-65 | Ncoa7         |
| ENSMUSG00000048216 | 1206.214  | 2.381 | 0.183 | 13.037 | 7.5E-39 | 2.9696E-37 | Gpr85         |
| ENSMUSG00000036986 | 8276.633  | 2.378 | 0.211 | 11.269 | 1.9E-29 | 5.1841E-28 | Pml           |
| ENSMUSG00000024339 | 7305.169  | 2.378 | 0.132 | 18.040 | 9.5E-73 | 9.5454E-71 | Tap2          |
| ENSMUSG00000032690 | 5220.321  | 2.375 | 0.362 | 6.559  | 5.4E-11 | 5.3007E-10 | Oas2          |
| ENSMUSG00000046207 | 3312.266  | 2.374 | 0.148 | 16.072 | 4.0E-58 | 2.8387E-56 | Pik3r6        |
| ENSMUSG00000031792 | 13973.029 | 2.374 | 0.143 | 16.578 | 1.0E-61 | 7.708E-60  | Usb1          |
| ENSMUSG00000001123 | 53099.209 | 2.372 | 0.165 | 14.395 | 5.5E-47 | 2.7892E-45 | Lgals9        |
| ENSMUSG00000080316 | 301.157   | 2.370 | 0.220 | 10.766 | 5.0E-27 | 1.2401E-25 | Spaca6        |
| ENSMUSG00000021367 | 969.466   | 2.370 | 0.218 | 10.885 | 1.4E-27 | 3.4525E-26 | Edn1          |
| ENSMUSG00000053175 | 9503.355  | 2.370 | 0.143 | 16.531 | 2.2E-61 | 1.6824E-59 | Bcl3          |
| ENSMUSG00000096957 | 174.520   | 2.370 | 0.342 | 6.922  | 4.4E-12 | 4.7609E-11 | E230013L22Rik |
| ENSMUSG00000010358 | 12439.890 | 2.369 | 0.260 | 9.116  | 7.8E-20 | 1.4009E-18 | Ifi35         |
| ENSMUSG00000027776 | 439.142   | 2.364 | 0.287 | 8.223  | 2.0E-16 | 2.8898E-15 | Il12a         |
| ENSMUSG00000039891 | 52.330    | 2.362 | 0.843 | 2.801  | 5.1E-03 | 0.01736248 | Txlnb         |
| ENSMUSG00000026131 | 3123.051  | 2.360 | 0.140 | 16.884 | 5.9E-64 | 4.9474E-62 | Dst           |
| ENSMUSG00000087175 | 63.082    | 2.359 | 0.384 | 6.137  | 8.4E-10 | 7.4651E-09 | Gm15133       |
| ENSMUSG00000078606 | 253.496   | 2.359 | 0.300 | 7.862  | 3.8E-15 | 5.0361E-14 | Gvin2         |
| ENSMUSG00000074628 | 14.273    | 2.356 | 0.824 | 2.859  | 4.2E-03 | 0.01473937 | Tldc2         |
| ENSMUSG00000085279 | 36.107    | 2.349 | 0.669 | 3.511  | 4.5E-04 | 0.00188619 | Gm15965       |
| ENSMUSG00000024737 | 12310.320 | 2.345 | 0.147 | 15.914 | 5.1E-57 | 3.5021E-55 | Slc15a3       |
| ENSMUSG00000066364 | 183.238   | 2.344 | 0.519 | 4.518  | 6.2E-06 | 3.5644E-05 | Serpina3b     |
| ENSMUSG00000049659 | 10851.913 | 2.344 | 0.155 | 15.086 | 2.0E-51 | 1.1618E-49 | Aftph         |
| ENSMUSG00000044288 | 63.710    | 2.341 | 0.870 | 2.692  | 7.1E-03 | 0.0231754  | Cnr1          |
| ENSMUSG00000018459 | 1818.765  | 2.340 | 0.154 | 15.237 | 2.0E-52 | 1.1873E-50 | Slc13a3       |
| ENSMUSG00000033581 | 3154.025  | 2.339 | 0.173 | 13.548 | 8.1E-42 | 3.5163E-40 | Igf2bp2       |

|                    |           |       |       |        |          |            |               |
|--------------------|-----------|-------|-------|--------|----------|------------|---------------|
| ENSMUSG00000034640 | 9706.336  | 2.339 | 0.139 | 16.888 | 5.5E-64  | 4.602E-62  | Tiparp        |
| ENSMUSG00000003206 | 4474.273  | 2.339 | 0.138 | 16.999 | 8.4E-65  | 7.2173E-63 | Ebi3          |
| ENSMUSG00000066456 | 1079.633  | 2.338 | 0.192 | 12.164 | 4.8E-34  | 1.5981E-32 | Hmgn3         |
| ENSMUSG00000039841 | 4240.906  | 2.335 | 0.128 | 18.257 | 1.8E-74  | 1.9089E-72 | Zfp800        |
| ENSMUSG00000052776 | 19234.484 | 2.334 | 0.320 | 7.291  | 3.1E-13  | 3.6275E-12 | Oas1a         |
| ENSMUSG00000058818 | 21324.898 | 2.334 | 0.108 | 21.617 | 1.2E-103 | 2.413E-101 | Pirb          |
| ENSMUSG00000019699 | 1394.818  | 2.334 | 0.174 | 13.375 | 8.5E-41  | 3.5681E-39 | Akt3          |
| ENSMUSG00000024308 | 83888.738 | 2.332 | 0.115 | 20.197 | 1.0E-90  | 1.5802E-88 | Tapbp         |
| ENSMUSG00000035000 | 162.469   | 2.325 | 0.502 | 4.630  | 3.7E-06  | 2.1506E-05 | Dpp4          |
| ENSMUSG00000021125 | 1334.730  | 2.323 | 0.295 | 7.864  | 3.7E-15  | 4.9935E-14 | Arg2          |
| ENSMUSG00000091971 | 1942.946  | 2.321 | 0.166 | 13.963 | 2.6E-44  | 1.2208E-42 | Hspa1a        |
| ENSMUSG00000023243 | 43.471    | 2.320 | 0.909 | 2.552  | 1.1E-02  | 0.03327447 | Kcnk5         |
| ENSMUSG00000117999 | 5.951     | 2.316 | 0.969 | 2.392  | 1.7E-02  | 0.04926618 | Gm18217       |
| ENSMUSG00000033066 | 27438.779 | 2.316 | 0.101 | 22.915 | 3.3E-116 | 8.758E-114 | Gas7          |
| ENSMUSG00000086755 | 42.508    | 2.316 | 0.587 | 3.947  | 7.9E-05  | 0.00038193 | Gm11216       |
| ENSMUSG00000111639 | 33.699    | 2.315 | 0.765 | 3.026  | 2.5E-03  | 0.0090721  | 1700019L13Rik |
| ENSMUSG00000027995 | 14444.101 | 2.314 | 0.167 | 13.819 | 2.0E-43  | 8.8339E-42 | Tlr2          |
| ENSMUSG00000024793 | 55.398    | 2.313 | 0.752 | 3.077  | 2.1E-03  | 0.00777561 | Tnfrsf25      |
| ENSMUSG00000103596 | 102.166   | 2.312 | 0.524 | 4.412  | 1.0E-05  | 5.667E-05  | Gm37354       |
| ENSMUSG00000048186 | 81.008    | 2.311 | 0.678 | 3.409  | 6.5E-04  | 0.00267623 | Bend7         |
| ENSMUSG00000104213 | 118.280   | 2.310 | 0.504 | 4.580  | 4.6E-06  | 2.6872E-05 | Ighd          |
| ENSMUSG00000045795 | 2868.582  | 2.309 | 0.156 | 14.823 | 1.0E-49  | 5.7294E-48 | Whamm         |
| ENSMUSG00000032508 | 15659.885 | 2.307 | 0.119 | 19.471 | 1.9E-84  | 2.4561E-82 | Myd88         |
| ENSMUSG00000072620 | 85141.171 | 2.306 | 0.186 | 12.407 | 2.4E-35  | 8.2733E-34 | Slfn2         |
| ENSMUSG00000004535 | 24366.646 | 2.306 | 0.127 | 18.172 | 8.6E-74  | 8.8002E-72 | Tax1bp1       |
| ENSMUSG00000108604 | 22.627    | 2.304 | 0.645 | 3.570  | 3.6E-04  | 0.00154169 | Gm44850       |
| ENSMUSG00000039735 | 1893.777  | 2.303 | 0.212 | 10.843 | 2.2E-27  | 5.4414E-26 | Fnbp11        |
| ENSMUSG00000103887 | 13.345    | 2.303 | 0.820 | 2.808  | 5.0E-03  | 0.01701823 | Gm37008       |
| ENSMUSG00000027882 | 7642.254  | 2.301 | 0.132 | 17.428 | 5.1E-68  | 4.7247E-66 | Stxbp3        |
| ENSMUSG00000025389 | 17.694    | 2.300 | 0.746 | 3.081  | 2.1E-03  | 0.00769097 | Mip           |
| ENSMUSG00000027366 | 17325.235 | 2.297 | 0.107 | 21.538 | 6.8E-103 | 1.302E-100 | Spp12a        |
| ENSMUSG00000042265 | 1296.758  | 2.296 | 0.210 | 10.910 | 1.0E-27  | 2.6572E-26 | Trem1         |
| ENSMUSG00000037242 | 85600.742 | 2.295 | 0.111 | 20.660 | 7.9E-95  | 1.2814E-92 | Clic4         |
| ENSMUSG00000101389 | 33205.798 | 2.294 | 0.181 | 12.645 | 1.2E-36  | 4.3406E-35 | Ms4a4a        |
| ENSMUSG00000042700 | 2462.257  | 2.294 | 0.166 | 13.815 | 2.1E-43  | 9.3106E-42 | Sipa111       |
| ENSMUSG00000020589 | 3167.638  | 2.293 | 0.134 | 17.109 | 1.3E-65  | 1.1164E-63 | Cyria         |
| ENSMUSG00000042726 | 28257.527 | 2.293 | 0.195 | 11.781 | 4.9E-32  | 1.5054E-30 | Trafd1        |
| ENSMUSG00000032578 | 695.035   | 2.284 | 0.182 | 12.585 | 2.6E-36  | 9.2002E-35 | Cish          |
| ENSMUSG00000023249 | 2528.663  | 2.282 | 0.160 | 14.218 | 7.1E-46  | 3.4823E-44 | Parp3         |
| ENSMUSG00000110126 | 24.197    | 2.281 | 0.622 | 3.670  | 2.4E-04  | 0.00108331 | Gm9347        |
| ENSMUSG00000032094 | 50.052    | 2.280 | 0.624 | 3.656  | 2.6E-04  | 0.00113916 | Cd3d          |
| ENSMUSG00000040329 | 1000.557  | 2.280 | 0.190 | 12.017 | 2.9E-33  | 9.3326E-32 | Il7           |
| ENSMUSG00000066150 | 16613.523 | 2.277 | 0.113 | 20.146 | 2.9E-90  | 4.3857E-88 | Slc31a1       |
| ENSMUSG00000041571 | 12171.495 | 2.275 | 0.097 | 23.437 | 1.8E-121 | 5.519E-119 | Selenow       |
| ENSMUSG00000071350 | 2059.753  | 2.273 | 0.222 | 10.219 | 1.6E-24  | 3.6586E-23 | Setdb2        |
| ENSMUSG00000029822 | 1873.411  | 2.273 | 0.204 | 11.124 | 9.6E-29  | 2.5792E-27 | Osbp13        |
| ENSMUSG00000090523 | 2751.047  | 2.273 | 0.135 | 16.798 | 2.5E-63  | 2.0472E-61 | Gypc          |
| ENSMUSG00000041540 | 38.317    | 2.273 | 0.726 | 3.131  | 1.7E-03  | 0.00659267 | Sox5          |
| ENSMUSG00000007655 | 1509.725  | 2.272 | 0.160 | 14.178 | 1.3E-45  | 6.0883E-44 | Cav1          |
| ENSMUSG00000050029 | 4963.390  | 2.268 | 0.146 | 15.569 | 1.2E-54  | 7.4053E-53 | Rap2c         |
| ENSMUSG00000109719 | 61.789    | 2.267 | 0.756 | 2.999  | 2.7E-03  | 0.00985965 | Gm45266       |
| ENSMUSG00000074482 | 23.733    | 2.266 | 0.598 | 3.789  | 1.5E-04  | 0.00069942 | Gm16589       |

|                    |           |       |       |        |          |            |          |
|--------------------|-----------|-------|-------|--------|----------|------------|----------|
| ENSMUSG00000034959 | 530.891   | 2.266 | 0.281 | 8.061  | 7.5E-16  | 1.0578E-14 | Rubcn1   |
| ENSMUSG00000108436 | 103.933   | 2.260 | 0.930 | 2.430  | 1.5E-02  | 0.04500837 | Gm44851  |
| ENSMUSG00000033192 | 9275.655  | 2.259 | 0.124 | 18.159 | 1.1E-73  | 1.1194E-71 | Lpcat2   |
| ENSMUSG00000032593 | 130.056   | 2.259 | 0.434 | 5.206  | 1.9E-07  | 1.3269E-06 | Amigo3   |
| ENSMUSG00000028793 | 13268.557 | 2.258 | 0.126 | 17.879 | 1.7E-71  | 1.6857E-69 | Rnf19b   |
| ENSMUSG00000050549 | 4997.526  | 2.256 | 0.132 | 17.136 | 8.0E-66  | 7.0029E-64 | Fam241a  |
| ENSMUSG00000039994 | 1092.169  | 2.255 | 0.171 | 13.209 | 7.8E-40  | 3.1658E-38 | Timeless |
| ENSMUSG00000074796 | 192.039   | 2.255 | 0.463 | 4.867  | 1.1E-06  | 7.0848E-06 | Slc4a11  |
| ENSMUSG00000039531 | 5587.830  | 2.254 | 0.198 | 11.362 | 6.4E-30  | 1.8109E-28 | Zup1     |
| ENSMUSG00000052143 | 30.349    | 2.253 | 0.778 | 2.895  | 3.8E-03  | 0.01332798 | Gm9869   |
| ENSMUSG00000090812 | 47.918    | 2.251 | 0.443 | 5.077  | 3.8E-07  | 2.5366E-06 | Samd15   |
| ENSMUSG00000100880 | 29.989    | 2.250 | 0.712 | 3.160  | 1.6E-03  | 0.00601598 | Gm6610   |
| ENSMUSG00000026222 | 15542.849 | 2.250 | 0.265 | 8.481  | 2.2E-17  | 3.4501E-16 | Sp100    |
| ENSMUSG00000035929 | 128.220   | 2.247 | 0.396 | 5.674  | 1.4E-08  | 1.0956E-07 | H2-Q4    |
| ENSMUSG00000064289 | 7861.059  | 2.244 | 0.121 | 18.524 | 1.3E-76  | 1.4331E-74 | Tank     |
| ENSMUSG00000117418 | 9.435     | 2.243 | 0.931 | 2.410  | 1.6E-02  | 0.0471675  | Gm50063  |
| ENSMUSG00000029530 | 348.289   | 2.238 | 0.444 | 5.038  | 4.7E-07  | 3.0705E-06 | Ccr9     |
| ENSMUSG00000035725 | 6316.656  | 2.236 | 0.143 | 15.639 | 4.0E-55  | 2.5337E-53 | Prkx     |
| ENSMUSG00000047098 | 5129.381  | 2.235 | 0.143 | 15.662 | 2.8E-55  | 1.7908E-53 | Rnf31    |
| ENSMUSG00000065968 | 168.221   | 2.233 | 0.351 | 6.370  | 1.9E-10  | 1.7816E-09 | Ifitm7   |
| ENSMUSG00000002699 | 18364.210 | 2.230 | 0.084 | 26.437 | 5.1E-154 | 2.86E-151  | Lcp2     |
| ENSMUSG00000029371 | 837.205   | 2.225 | 0.219 | 10.139 | 3.7E-24  | 8.2082E-23 | Cxcl5    |
| ENSMUSG00000026110 | 1738.581  | 2.225 | 0.164 | 13.559 | 7.1E-42  | 3.0709E-40 | Mgat4a   |
| ENSMUSG00000026582 | 98.775    | 2.223 | 0.815 | 2.728  | 6.4E-03  | 0.02111491 | Sele     |
| ENSMUSG00000090216 | 51.262    | 2.222 | 0.389 | 5.720  | 1.1E-08  | 8.4913E-08 | Gm16549  |
| ENSMUSG00000104920 | 140.321   | 2.219 | 0.394 | 5.632  | 1.8E-08  | 1.3838E-07 | Gm43215  |
| ENSMUSG00000108059 | 41.685    | 2.218 | 0.768 | 2.889  | 3.9E-03  | 0.01352061 | Gm44369  |
| ENSMUSG00000109589 | 31.383    | 2.218 | 0.691 | 3.209  | 1.3E-03  | 0.00516231 | Gm45267  |
| ENSMUSG00000062300 | 2565.418  | 2.217 | 0.133 | 16.653 | 2.9E-62  | 2.2767E-60 | Nectin2  |
| ENSMUSG00000034833 | 114.474   | 2.215 | 0.402 | 5.503  | 3.7E-08  | 2.8071E-07 | Tespa1   |
| ENSMUSG00000035164 | 849.165   | 2.214 | 0.199 | 11.125 | 9.5E-29  | 2.549E-27  | Zc3h12c  |
| ENSMUSG00000031553 | 15.564    | 2.213 | 0.867 | 2.552  | 1.1E-02  | 0.03320498 | Adam3    |
| ENSMUSG00000103734 | 91.856    | 2.212 | 0.523 | 4.233  | 2.3E-05  | 0.00012083 | Gm37651  |
| ENSMUSG00000073628 | 25.628    | 2.212 | 0.584 | 3.789  | 1.5E-04  | 0.00069896 | Gm10552  |
| ENSMUSG00000086695 | 38.206    | 2.209 | 0.407 | 5.421  | 5.9E-08  | 4.3599E-07 | Gm15247  |
| ENSMUSG00000055809 | 99.952    | 2.208 | 0.465 | 4.745  | 2.1E-06  | 1.2643E-05 | Dnaaf3   |
| ENSMUSG00000079186 | 99.245    | 2.208 | 0.627 | 3.522  | 4.3E-04  | 0.00182058 | Gzmc     |
| ENSMUSG00000049502 | 13717.352 | 2.206 | 0.275 | 8.014  | 1.1E-15  | 1.5407E-14 | Dtx3l    |
| ENSMUSG00000020415 | 7019.609  | 2.204 | 0.173 | 12.719 | 4.6E-37  | 1.718E-35  | Pttg1    |
| ENSMUSG00000050212 | 3110.643  | 2.204 | 0.148 | 14.906 | 3.0E-50  | 1.6815E-48 | Eva1b    |
| ENSMUSG00000002983 | 7314.548  | 2.203 | 0.136 | 16.245 | 2.4E-59  | 1.7578E-57 | Relb     |
| ENSMUSG00000021758 | 207.945   | 2.203 | 0.422 | 5.216  | 1.8E-07  | 1.2635E-06 | Ddx4     |
| ENSMUSG00000020953 | 41.779    | 2.203 | 0.748 | 2.947  | 3.2E-03  | 0.01147827 | Coch     |
| ENSMUSG00000042608 | 7503.777  | 2.203 | 0.110 | 20.044 | 2.3E-89  | 3.3774E-87 | Stk40    |
| ENSMUSG00000072572 | 41.822    | 2.203 | 0.595 | 3.704  | 2.1E-04  | 0.0009524  | Slc39a2  |
| ENSMUSG00000071068 | 1343.693  | 2.203 | 0.250 | 8.801  | 1.4E-18  | 2.2689E-17 | Trem12   |
| ENSMUSG00000030921 | 24017.586 | 2.199 | 0.307 | 7.154  | 8.4E-13  | 9.5382E-12 | Trim30a  |
| ENSMUSG00000042641 | 47.583    | 2.198 | 0.780 | 2.817  | 4.8E-03  | 0.01660007 | Rgs11    |
| ENSMUSG00000040829 | 1105.576  | 2.196 | 0.156 | 14.098 | 3.9E-45  | 1.8641E-43 | Zmynd15  |
| ENSMUSG00000070327 | 10329.923 | 2.195 | 0.358 | 6.124  | 9.1E-10  | 8.0674E-09 | Rnf213   |
| ENSMUSG00000070284 | 3027.775  | 2.195 | 0.113 | 19.484 | 1.5E-84  | 1.915E-82  | Gmppb    |
| ENSMUSG00000073758 | 72.133    | 2.191 | 0.757 | 2.894  | 3.8E-03  | 0.01333403 | Sh3d21   |

|                    |           |       |       |        |          |            |               |
|--------------------|-----------|-------|-------|--------|----------|------------|---------------|
| ENSMUSG00000098108 | 14.808    | 2.191 | 0.808 | 2.710  | 6.7E-03  | 0.02217291 | Gm27008       |
| ENSMUSG00000098219 | 8.829     | 2.189 | 0.836 | 2.617  | 8.9E-03  | 0.0281953  | Gm7481        |
| ENSMUSG00000043811 | 33.593    | 2.188 | 0.698 | 3.134  | 1.7E-03  | 0.00653317 | Rtn4r         |
| ENSMUSG00000035004 | 18839.114 | 2.187 | 0.087 | 25.264 | 7.9E-141 | 3.271E-138 | Igsf6         |
| ENSMUSG00000038527 | 552.897   | 2.186 | 0.182 | 12.005 | 3.3E-33  | 1.0688E-31 | C1rl          |
| ENSMUSG00000083270 | 9.202     | 2.185 | 0.787 | 2.775  | 5.5E-03  | 0.01863696 | Gm13498       |
| ENSMUSG00000058163 | 4180.974  | 2.184 | 0.375 | 5.831  | 5.5E-09  | 4.5349E-08 | Gm5431        |
| ENSMUSG00000093490 | 17.369    | 2.182 | 0.639 | 3.413  | 6.4E-04  | 0.00263838 | Gm19932       |
| ENSMUSG00000118291 | 8.187     | 2.181 | 0.841 | 2.593  | 9.5E-03  | 0.02991523 | Csflr-ps      |
| ENSMUSG00000028064 | 10249.134 | 2.179 | 0.091 | 23.879 | 5.1E-126 | 1.711E-123 | Sema4a        |
| ENSMUSG00000104088 | 27.091    | 2.178 | 0.854 | 2.551  | 1.1E-02  | 0.03328932 | Gm38275       |
| ENSMUSG00000025076 | 2665.362  | 2.177 | 0.112 | 19.513 | 8.5E-85  | 1.0958E-82 | Casp7         |
| ENSMUSG00000029561 | 37535.229 | 2.176 | 0.404 | 5.387  | 7.2E-08  | 5.214E-07  | Oas12         |
| ENSMUSG00000031762 | 130.832   | 2.176 | 0.374 | 5.811  | 6.2E-09  | 5.0621E-08 | Mt2           |
| ENSMUSG00000049608 | 315.399   | 2.175 | 0.257 | 8.448  | 3.0E-17  | 4.549E-16  | Gpr55         |
| ENSMUSG00000103747 | 349.316   | 2.170 | 0.220 | 9.882  | 5.0E-23  | 1.0541E-21 | Gm38236       |
| ENSMUSG00000029915 | 4939.833  | 2.169 | 0.140 | 15.483 | 4.5E-54  | 2.7799E-52 | Clec5a        |
| ENSMUSG00000060594 | 612.360   | 2.169 | 0.170 | 12.735 | 3.8E-37  | 1.4061E-35 | Layn          |
| ENSMUSG00000033420 | 435.752   | 2.168 | 0.184 | 11.765 | 5.9E-32  | 1.8022E-30 | Antxr1        |
| ENSMUSG00000058248 | 41.312    | 2.168 | 0.852 | 2.544  | 1.1E-02  | 0.03394295 | Kcnh1         |
| ENSMUSG00000020910 | 1820.871  | 2.164 | 0.162 | 13.361 | 1.0E-40  | 4.3002E-39 | Adprm         |
| ENSMUSG00000015947 | 50541.953 | 2.164 | 0.263 | 8.239  | 1.7E-16  | 2.5338E-15 | Fcgr1         |
| ENSMUSG00000008193 | 564.344   | 2.164 | 0.249 | 8.703  | 3.2E-18  | 5.282E-17  | Spib          |
| ENSMUSG00000024245 | 104.879   | 2.164 | 0.632 | 3.423  | 6.2E-04  | 0.00254609 | Tmem178       |
| ENSMUSG00000017057 | 3858.520  | 2.161 | 0.179 | 12.046 | 2.0E-33  | 6.6015E-32 | Il13ra1       |
| ENSMUSG00000038521 | 83.181    | 2.161 | 0.471 | 4.585  | 4.5E-06  | 2.6351E-05 | C1s1          |
| ENSMUSG00000045232 | 47.193    | 2.160 | 0.885 | 2.440  | 1.5E-02  | 0.04381383 | Rln3          |
| ENSMUSG00000041046 | 288.287   | 2.160 | 0.323 | 6.678  | 2.4E-11  | 2.4414E-10 | Ramp3         |
| ENSMUSG00000056380 | 65.655    | 2.159 | 0.778 | 2.775  | 5.5E-03  | 0.01864276 | Gpr50         |
| ENSMUSG00000059657 | 47.640    | 2.158 | 0.505 | 4.273  | 1.9E-05  | 0.00010239 | Stfa211       |
| ENSMUSG00000043931 | 24.758    | 2.156 | 0.801 | 2.692  | 7.1E-03  | 0.02321252 | Gimap7        |
| ENSMUSG00000032066 | 333.648   | 2.156 | 0.313 | 6.893  | 5.5E-12  | 5.7988E-11 | Bco2          |
| ENSMUSG00000029413 | 2967.015  | 2.154 | 0.142 | 15.220 | 2.6E-52  | 1.5364E-50 | Naaa          |
| ENSMUSG00000059325 | 17.156    | 2.153 | 0.853 | 2.526  | 1.2E-02  | 0.03550642 | Hopx          |
| ENSMUSG00000032280 | 10136.215 | 2.151 | 0.136 | 15.813 | 2.5E-56  | 1.6909E-54 | Tle3          |
| ENSMUSG00000034634 | 986.093   | 2.151 | 0.172 | 12.471 | 1.1E-35  | 3.7719E-34 | Ly6d          |
| ENSMUSG00000026088 | 3842.055  | 2.148 | 0.160 | 13.439 | 3.6E-41  | 1.5289E-39 | Mitd1         |
| ENSMUSG00000058427 | 8397.293  | 2.147 | 0.199 | 10.800 | 3.4E-27  | 8.621E-26  | Cxcl2         |
| ENSMUSG00000040624 | 869.321   | 2.147 | 0.240 | 8.948  | 3.6E-19  | 6.285E-18  | Plekhg1       |
| ENSMUSG00000000303 | 120.448   | 2.145 | 0.434 | 4.938  | 7.9E-07  | 5.0185E-06 | Cdh1          |
| ENSMUSG00000020806 | 11799.187 | 2.144 | 0.134 | 16.034 | 7.4E-58  | 5.2234E-56 | Rhbdf2        |
| ENSMUSG00000040774 | 9487.126  | 2.144 | 0.100 | 21.375 | 2.3E-101 | 4.215E-99  | Cept1         |
| ENSMUSG00000097855 | 624.425   | 2.140 | 0.196 | 10.907 | 1.1E-27  | 2.7352E-26 | A930007I19Rik |
| ENSMUSG00000051413 | 6248.437  | 2.139 | 0.114 | 18.804 | 7.1E-79  | 8.0871E-77 | Plagl2        |
| ENSMUSG00000025278 | 1918.402  | 2.139 | 0.155 | 13.820 | 1.9E-43  | 8.7851E-42 | Flnb          |
| ENSMUSG00000018012 | 943.231   | 2.138 | 0.210 | 10.184 | 2.3E-24  | 5.225E-23  | Rac3          |
| ENSMUSG00000015314 | 704.541   | 2.137 | 0.165 | 12.953 | 2.3E-38  | 8.6994E-37 | Slamf6        |
| ENSMUSG00000117359 | 8.842     | 2.136 | 0.754 | 2.835  | 4.6E-03  | 0.01581528 | Gm7466        |
| ENSMUSG00000112212 | 34.227    | 2.133 | 0.728 | 2.931  | 3.4E-03  | 0.01201984 | Gm46189       |
| ENSMUSG00000102662 | 169.278   | 2.132 | 0.552 | 3.863  | 1.1E-04  | 0.00052777 | Gm38377       |
| ENSMUSG00000066258 | 3167.650  | 2.131 | 0.195 | 10.923 | 9.0E-28  | 2.3132E-26 | Trim12a       |
| ENSMUSG00000109408 | 257.309   | 2.128 | 0.332 | 6.414  | 1.4E-10  | 1.3512E-09 | A930037H05Rik |

|                    |            |       |       |        |          |            |               |
|--------------------|------------|-------|-------|--------|----------|------------|---------------|
| ENSMUSG00000082154 | 19.538     | 2.127 | 0.673 | 3.163  | 1.6E-03  | 0.00597706 | Gm16464       |
| ENSMUSG00000034118 | 4247.101   | 2.127 | 0.212 | 10.027 | 1.2E-23  | 2.5109E-22 | Tpst1         |
| ENSMUSG00000101262 | 24.204     | 2.126 | 0.542 | 3.923  | 8.8E-05  | 0.00041961 | Gm8326        |
| ENSMUSG00000050128 | 7.513      | 2.124 | 0.839 | 2.530  | 1.1E-02  | 0.03515888 | Olfr1023      |
| ENSMUSG00000025357 | 1456.881   | 2.123 | 0.209 | 10.169 | 2.7E-24  | 6.1241E-23 | Dgka          |
| ENSMUSG00000026814 | 5798.700   | 2.120 | 0.131 | 16.193 | 5.7E-59  | 4.0584E-57 | Eng           |
| ENSMUSG00000085721 | 19.437     | 2.120 | 0.603 | 3.514  | 4.4E-04  | 0.00187126 | Gm12796       |
| ENSMUSG00000081957 | 24.459     | 2.119 | 0.506 | 4.185  | 2.8E-05  | 0.00014689 | Ak312-ps      |
| ENSMUSG00000047631 | 23.432     | 2.118 | 0.721 | 2.939  | 3.3E-03  | 0.01175492 | Apof          |
| ENSMUSG00000079419 | 17712.320  | 2.115 | 0.156 | 13.570 | 6.0E-42  | 2.6222E-40 | Ms4a6c        |
| ENSMUSG00000090307 | 589.698    | 2.110 | 0.242 | 8.730  | 2.5E-18  | 4.1755E-17 | 1700071M16Rik |
| ENSMUSG00000074472 | 35.237     | 2.109 | 0.785 | 2.686  | 7.2E-03  | 0.02355708 | Zfp872        |
| ENSMUSG00000085913 | 27.548     | 2.109 | 0.666 | 3.168  | 1.5E-03  | 0.00588427 | Gm15601       |
| ENSMUSG00000009185 | 5288.373   | 2.108 | 0.435 | 4.842  | 1.3E-06  | 7.9966E-06 | Ccl8          |
| ENSMUSG00000064120 | 2491.327   | 2.108 | 0.114 | 18.545 | 8.9E-77  | 9.6974E-75 | Mocs1         |
| ENSMUSG00000032311 | 230.568    | 2.104 | 0.241 | 8.727  | 2.6E-18  | 4.2848E-17 | Nrg4          |
| ENSMUSG00000112186 | 65.781     | 2.101 | 0.339 | 6.203  | 5.5E-10  | 4.9821E-09 | Gm2412        |
| ENSMUSG00000047746 | 61.524     | 2.101 | 0.576 | 3.649  | 2.6E-04  | 0.00116546 | Fbxo40        |
| ENSMUSG00000095687 | 65.111     | 2.100 | 0.367 | 5.722  | 1.1E-08  | 8.3674E-08 | Rnaset2a      |
| ENSMUSG00000024677 | 16433.455  | 2.099 | 0.180 | 11.693 | 1.4E-31  | 4.1422E-30 | Ms4a6b        |
| ENSMUSG00000052397 | 11858.632  | 2.098 | 0.113 | 18.566 | 6.0E-77  | 6.6292E-75 | Ezr           |
| ENSMUSG00000109663 | 411.886    | 2.097 | 0.282 | 7.442  | 9.9E-14  | 1.2109E-12 | Gm5331        |
| ENSMUSG00000027456 | 107.759    | 2.096 | 0.520 | 4.029  | 5.6E-05  | 0.00027781 | Sdcbp2        |
| ENSMUSG00000030403 | 36179.996  | 2.094 | 0.063 | 33.148 | 6.0E-241 | 1.024E-237 | Vasp          |
| ENSMUSG00000025492 | 118573.732 | 2.092 | 0.178 | 11.769 | 5.6E-32  | 1.7056E-30 | Ifitm3        |
| ENSMUSG00000074805 | 51.110     | 2.090 | 0.782 | 2.673  | 7.5E-03  | 0.02437637 | Il1bos        |
| ENSMUSG00000082684 | 14.751     | 2.089 | 0.750 | 2.786  | 5.3E-03  | 0.01810732 | Gm12774       |
| ENSMUSG00000027834 | 153.344    | 2.088 | 0.578 | 3.615  | 3.0E-04  | 0.00131399 | Serpini1      |
| ENSMUSG00000036362 | 898.364    | 2.088 | 0.248 | 8.427  | 3.5E-17  | 5.4112E-16 | P2ry13        |
| ENSMUSG00000062991 | 651.622    | 2.087 | 0.262 | 7.966  | 1.6E-15  | 2.2427E-14 | Nrg1          |
| ENSMUSG00000006782 | 14649.213  | 2.086 | 0.156 | 13.366 | 9.6E-41  | 4E-39      | Cnp           |
| ENSMUSG00000024754 | 13974.762  | 2.086 | 0.140 | 14.906 | 3.0E-50  | 1.6815E-48 | Cemip2        |
| ENSMUSG00000020120 | 47282.311  | 2.085 | 0.101 | 20.707 | 3.0E-95  | 4.9453E-93 | Plek          |
| ENSMUSG00000024730 | 139.500    | 2.085 | 0.335 | 6.222  | 4.9E-10  | 4.4278E-09 | Ms4a8a        |
| ENSMUSG00000021298 | 1329.012   | 2.083 | 0.175 | 11.876 | 1.6E-32  | 4.9553E-31 | Gpr132        |
| ENSMUSG00000084105 | 12.377     | 2.083 | 0.748 | 2.786  | 5.3E-03  | 0.01810899 | Gm13252       |
| ENSMUSG00000111904 | 19.673     | 2.082 | 0.623 | 3.344  | 8.3E-04  | 0.00332639 | Gm2395        |
| ENSMUSG00000039753 | 7542.743   | 2.081 | 0.119 | 17.536 | 7.7E-69  | 7.2988E-67 | Fbx15         |
| ENSMUSG00000043943 | 51.836     | 2.079 | 0.647 | 3.215  | 1.3E-03  | 0.00506524 | Naalad2       |
| ENSMUSG00000103546 | 264.735    | 2.079 | 0.271 | 7.680  | 1.6E-14  | 2.0325E-13 | Gm37666       |
| ENSMUSG00000033487 | 9906.795   | 2.078 | 0.164 | 12.684 | 7.3E-37  | 2.6678E-35 | Fndc3a        |
| ENSMUSG00000042182 | 112.628    | 2.078 | 0.522 | 3.979  | 6.9E-05  | 0.00033773 | Bend6         |
| ENSMUSG00000051790 | 305.119    | 2.078 | 0.273 | 7.624  | 2.5E-14  | 3.1027E-13 | Nlgn2         |
| ENSMUSG00000054404 | 18216.475  | 2.077 | 0.331 | 6.269  | 3.6E-10  | 3.3307E-09 | Slfn5         |
| ENSMUSG00000038437 | 656.440    | 2.077 | 0.222 | 9.365  | 7.6E-21  | 1.4313E-19 | Mllt6         |
| ENSMUSG00000039960 | 232.832    | 2.077 | 0.424 | 4.902  | 9.5E-07  | 5.9948E-06 | Rhou          |
| ENSMUSG00000036249 | 2611.411   | 2.076 | 0.156 | 13.313 | 1.9E-40  | 8.0769E-39 | Rbm43         |
| ENSMUSG00000053137 | 314.054    | 2.076 | 0.304 | 6.832  | 8.4E-12  | 8.7218E-11 | Mapk11        |
| ENSMUSG00000030748 | 26008.794  | 2.076 | 0.173 | 12.029 | 2.5E-33  | 8.0784E-32 | Il4ra         |
| ENSMUSG00000037344 | 4094.250   | 2.076 | 0.163 | 12.769 | 2.4E-37  | 9.1298E-36 | Slc12a9       |
| ENSMUSG00000026285 | 113.467    | 2.073 | 0.485 | 4.276  | 1.9E-05  | 0.00010109 | Pcd1          |
| ENSMUSG00000020707 | 2737.900   | 2.072 | 0.169 | 12.266 | 1.4E-34  | 4.6314E-33 | Rnfl35        |

|                    |           |       |       |        |          |            |                |
|--------------------|-----------|-------|-------|--------|----------|------------|----------------|
| ENSMUSG00000069893 | 973.054   | 2.071 | 0.209 | 9.887  | 4.7E-23  | 9.9683E-22 | 9930111J21Rik1 |
| ENSMUSG00000105275 | 23.638    | 2.069 | 0.649 | 3.187  | 1.4E-03  | 0.00554127 | Gm43214        |
| ENSMUSG00000074500 | 190.566   | 2.069 | 0.374 | 5.534  | 3.1E-08  | 2.3707E-07 | Zfp558         |
| ENSMUSG00000047959 | 1936.039  | 2.068 | 0.162 | 12.748 | 3.2E-37  | 1.1955E-35 | Kcna3          |
| ENSMUSG00000107019 | 41.673    | 2.063 | 0.464 | 4.441  | 9.0E-06  | 5.0011E-05 | Gm43682        |
| ENSMUSG00000067212 | 11910.886 | 2.059 | 0.196 | 10.487 | 9.9E-26  | 2.3294E-24 | H2-T23         |
| ENSMUSG00000041649 | 106.408   | 2.059 | 0.558 | 3.690  | 2.2E-04  | 0.00100423 | Klf8           |
| ENSMUSG00000017830 | 8906.468  | 2.058 | 0.323 | 6.373  | 1.9E-10  | 1.7462E-09 | Dhx58          |
| ENSMUSG00000022575 | 12885.735 | 2.056 | 0.105 | 19.648 | 6.0E-86  | 8.2161E-84 | Gsdmd          |
| ENSMUSG00000022197 | 104.287   | 2.054 | 0.351 | 5.854  | 4.8E-09  | 3.9736E-08 | Pdzd2          |
| ENSMUSG00000042677 | 4331.246  | 2.051 | 0.131 | 15.626 | 4.8E-55  | 3.074E-53  | Zc3h12a        |
| ENSMUSG00000024338 | 21680.992 | 2.050 | 0.123 | 16.655 | 2.8E-62  | 2.2033E-60 | Psmb8          |
| ENSMUSG00000106478 | 37.880    | 2.050 | 0.445 | 4.606  | 4.1E-06  | 2.4034E-05 | Gm36551        |
| ENSMUSG00000035678 | 2969.397  | 2.048 | 0.128 | 16.047 | 6.0E-58  | 4.1967E-56 | Tnfsf9         |
| ENSMUSG00000038188 | 5192.063  | 2.047 | 0.161 | 12.709 | 5.3E-37  | 1.939E-35  | Scarf1         |
| ENSMUSG00000027035 | 11494.946 | 2.047 | 0.093 | 22.119 | 2.1E-108 | 4.41E-106  | Cers6          |
| ENSMUSG00000024673 | 200.088   | 2.047 | 0.403 | 5.080  | 3.8E-07  | 2.5009E-06 | Ms4a1          |
| ENSMUSG00000027883 | 3068.658  | 2.046 | 0.226 | 9.050  | 1.4E-19  | 2.5135E-18 | Gpsm2          |
| ENSMUSG00000030966 | 243.349   | 2.046 | 0.387 | 5.289  | 1.2E-07  | 8.6899E-07 | Trim21         |
| ENSMUSG00000030088 | 326.440   | 2.044 | 0.375 | 5.453  | 4.9E-08  | 3.6572E-07 | Aldh111        |
| ENSMUSG00000069892 | 1193.823  | 2.044 | 0.184 | 11.090 | 1.4E-28  | 3.7278E-27 | 9930111J21Rik2 |
| ENSMUSG00000004952 | 12777.113 | 2.043 | 0.150 | 13.624 | 2.9E-42  | 1.2751E-40 | Rasa4          |
| ENSMUSG00000022216 | 18134.178 | 2.042 | 0.103 | 19.893 | 4.7E-88  | 6.7914E-86 | Psme1          |
| ENSMUSG00000030275 | 4779.677  | 2.040 | 0.174 | 11.752 | 6.9E-32  | 2.0668E-30 | Etnk1          |
| ENSMUSG00000021322 | 9625.868  | 2.040 | 0.119 | 17.176 | 4.0E-66  | 3.5587E-64 | Aoah           |
| ENSMUSG00000102051 | 11076.396 | 2.038 | 0.181 | 11.253 | 2.2E-29  | 6.1513E-28 | Ly6a2          |
| ENSMUSG00000032786 | 38536.845 | 2.038 | 0.080 | 25.436 | 1.0E-142 | 4.206E-140 | Alas1          |
| ENSMUSG00000024805 | 4180.424  | 2.037 | 0.125 | 16.246 | 2.4E-59  | 1.7332E-57 | Pcgf5          |
| ENSMUSG00000101132 | 65.056    | 2.037 | 0.357 | 5.705  | 1.2E-08  | 9.2376E-08 | Gm8000         |
| ENSMUSG00000000708 | 1057.397  | 2.036 | 0.163 | 12.522 | 5.7E-36  | 2.005E-34  | Kat2b          |
| ENSMUSG00000096140 | 181.141   | 2.035 | 0.337 | 6.045  | 1.5E-09  | 1.2923E-08 | Ankrd66        |
| ENSMUSG00000081512 | 12.255    | 2.033 | 0.733 | 2.774  | 5.5E-03  | 0.01868766 | Gm15821        |
| ENSMUSG00000030785 | 181.388   | 2.032 | 0.368 | 5.523  | 3.3E-08  | 2.5202E-07 | Cox6a2         |
| ENSMUSG00000046062 | 7729.787  | 2.031 | 0.117 | 17.360 | 1.7E-67  | 1.53E-65   | Ppp1r15b       |
| ENSMUSG00000020696 | 3297.807  | 2.030 | 0.131 | 15.462 | 6.3E-54  | 3.8497E-52 | Rffl           |
| ENSMUSG00000080977 | 133.034   | 2.028 | 0.285 | 7.103  | 1.2E-12  | 1.3634E-11 | Gm13772        |
| ENSMUSG00000039934 | 7188.752  | 2.024 | 0.093 | 21.868 | 5.2E-106 | 1.074E-103 | Gsap           |
| ENSMUSG00000102243 | 24.423    | 2.023 | 0.783 | 2.584  | 9.8E-03  | 0.03057496 | Gm37718        |
| ENSMUSG00000046157 | 4001.050  | 2.023 | 0.158 | 12.770 | 2.4E-37  | 9.0166E-36 | Tmem229b       |
| ENSMUSG00000026664 | 4207.224  | 2.022 | 0.178 | 11.337 | 8.6E-30  | 2.3987E-28 | Phyh           |
| ENSMUSG00000083678 | 99.061    | 2.020 | 0.271 | 7.454  | 9.1E-14  | 1.1086E-12 | Gm12989        |
| ENSMUSG00000049401 | 8088.146  | 2.019 | 0.164 | 12.306 | 8.4E-35  | 2.8614E-33 | Ogfr           |
| ENSMUSG00000021759 | 1029.531  | 2.014 | 0.157 | 12.862 | 7.3E-38  | 2.789E-36  | Plpp1          |
| ENSMUSG00000060647 | 15.182    | 2.014 | 0.556 | 3.623  | 2.9E-04  | 0.00127745 | Gm7099         |
| ENSMUSG00000023307 | 20094.713 | 2.014 | 0.116 | 17.418 | 6.1E-68  | 5.6078E-66 | Marchf5        |
| ENSMUSG00000039501 | 15556.797 | 2.013 | 0.284 | 7.081  | 1.4E-12  | 1.5985E-11 | Znfx1          |
| ENSMUSG00000040016 | 303.122   | 2.013 | 0.434 | 4.637  | 3.5E-06  | 2.082E-05  | Ptger3         |
| ENSMUSG00000024953 | 69058.530 | 2.012 | 0.086 | 23.408 | 3.6E-121 | 1.072E-118 | Prdx5          |
| ENSMUSG00000056025 | 635.106   | 2.010 | 0.235 | 8.547  | 1.3E-17  | 1.9923E-16 | Clea3a1        |
| ENSMUSG00000064262 | 32.589    | 2.006 | 0.811 | 2.474  | 1.3E-02  | 0.04035678 | Gimap8         |
| ENSMUSG00000022035 | 3749.930  | 2.005 | 0.134 | 14.958 | 1.4E-50  | 7.7497E-49 | Ccdc25         |
| ENSMUSG00000032011 | 43.406    | 2.002 | 0.449 | 4.460  | 8.2E-06  | 4.5959E-05 | Thy1           |



|                     |           |       |       |        |         |            |               |
|---------------------|-----------|-------|-------|--------|---------|------------|---------------|
| ENSMUSG00000044165  | 25.412    | 1.999 | 0.701 | 2.853  | 4.3E-03 | 0.01501609 | Bcl2l15       |
| ENSMUSG00000035713  | 274.570   | 1.998 | 0.263 | 7.598  | 3.0E-14 | 3.7911E-13 | Usp35         |
| ENSMUSG00000029007  | 9205.461  | 1.998 | 0.109 | 18.365 | 2.5E-75 | 2.6816E-73 | Agtrap        |
| ENSMUSG00000001166  | 350.278   | 1.997 | 0.344 | 5.806  | 6.4E-09 | 5.1953E-08 | Oas1c         |
| ENSMUSG000000037169 | 339.042   | 1.995 | 0.356 | 5.600  | 2.1E-08 | 1.6487E-07 | Mycn          |
| ENSMUSG000000041831 | 52.086    | 1.992 | 0.556 | 3.582  | 3.4E-04 | 0.00147594 | Syt13         |
| ENSMUSG000000031647 | 850.391   | 1.992 | 0.222 | 8.965  | 3.1E-19 | 5.3774E-18 | Mfap3l        |
| ENSMUSG000000039747 | 2744.924  | 1.992 | 0.129 | 15.426 | 1.1E-53 | 6.7136E-52 | Orai2         |
| ENSMUSG000000064128 | 501.006   | 1.991 | 0.224 | 8.873  | 7.1E-19 | 1.211E-17  | Cenpj         |
| ENSMUSG000000011008 | 2960.515  | 1.990 | 0.149 | 13.380 | 7.9E-41 | 3.3196E-39 | Mcoln2        |
| ENSMUSG000000050565 | 17357.684 | 1.989 | 0.166 | 11.966 | 5.4E-33 | 1.7199E-31 | Tor1aip2      |
| ENSMUSG000000038235 | 1416.052  | 1.989 | 0.256 | 7.773  | 7.7E-15 | 1.0003E-13 | F11r          |
| ENSMUSG000000033781 | 1417.717  | 1.988 | 0.199 | 9.973  | 2.0E-23 | 4.3065E-22 | Asb13         |
| ENSMUSG000000027018 | 6245.001  | 1.987 | 0.135 | 14.742 | 3.4E-49 | 1.8671E-47 | Hat1          |
| ENSMUSG000000035517 | 6100.022  | 1.987 | 0.172 | 11.541 | 8.2E-31 | 2.3898E-29 | Tdrd7         |
| ENSMUSG000000079053 | 112.292   | 1.987 | 0.362 | 5.484  | 4.2E-08 | 3.1071E-07 | Gm14010       |
| ENSMUSG000000048911 | 369.138   | 1.986 | 0.260 | 7.632  | 2.3E-14 | 2.9275E-13 | Rnf24         |
| ENSMUSG000000014846 | 86.327    | 1.984 | 0.492 | 4.034  | 5.5E-05 | 0.00027222 | Tppp3         |
| ENSMUSG000000038816 | 237.716   | 1.984 | 0.461 | 4.300  | 1.7E-05 | 9.1476E-05 | Ctnnal1       |
| ENSMUSG000000030990 | 4495.703  | 1.983 | 0.141 | 14.032 | 9.9E-45 | 4.6696E-43 | Pgap2         |
| ENSMUSG000000073144 | 701.075   | 1.976 | 0.224 | 8.823  | 1.1E-18 | 1.8714E-17 | 4930599N23Rik |
| ENSMUSG000000062524 | 60.758    | 1.976 | 0.655 | 3.015  | 2.6E-03 | 0.00940322 | Ncr1          |
| ENSMUSG000000055184 | 243.678   | 1.976 | 0.325 | 6.078  | 1.2E-09 | 1.064E-08  | Fam72a        |
| ENSMUSG000000095788 | 777.759   | 1.975 | 0.184 | 10.757 | 5.5E-27 | 1.3622E-25 | Sirpb1a       |
| ENSMUSG000000024065 | 735.354   | 1.974 | 0.212 | 9.326  | 1.1E-20 | 2.0577E-19 | Ehd3          |
| ENSMUSG000000040339 | 4740.057  | 1.974 | 0.202 | 9.784  | 1.3E-22 | 2.7146E-21 | Fam102b       |
| ENSMUSG000000030167 | 35.070    | 1.974 | 0.567 | 3.481  | 5.0E-04 | 0.00209222 | Klrc1         |
| ENSMUSG000000052544 | 58.462    | 1.969 | 0.518 | 3.798  | 1.5E-04 | 0.00067713 | St6galnac3    |
| ENSMUSG000000033227 | 149.439   | 1.967 | 0.400 | 4.920  | 8.7E-07 | 5.4849E-06 | Wnt6          |
| ENSMUSG000000022048 | 13842.496 | 1.965 | 0.128 | 15.327 | 5.0E-53 | 3.0498E-51 | Dpysl2        |
| ENSMUSG000000101431 | 83.804    | 1.963 | 0.336 | 5.846  | 5.0E-09 | 4.1496E-08 | Gm7901        |
| ENSMUSG000000096719 | 353.487   | 1.962 | 0.252 | 7.780  | 7.2E-15 | 9.4383E-14 | Mrgpra2b      |
| ENSMUSG000000064280 | 94.738    | 1.961 | 0.333 | 5.891  | 3.8E-09 | 3.1968E-08 | Ccdc146       |
| ENSMUSG000000029366 | 11929.571 | 1.961 | 0.290 | 6.750  | 1.5E-11 | 1.508E-10  | Dck           |
| ENSMUSG000000052087 | 3632.098  | 1.959 | 0.150 | 13.056 | 5.9E-39 | 2.3402E-37 | Rgs14         |
| ENSMUSG000000031504 | 6341.034  | 1.959 | 0.102 | 19.224 | 2.4E-82 | 2.8699E-80 | Rab20         |
| ENSMUSG000000057596 | 6998.688  | 1.959 | 0.372 | 5.261  | 1.4E-07 | 1.0058E-06 | Trim30d       |
| ENSMUSG000000004040 | 26976.102 | 1.958 | 0.109 | 18.009 | 1.6E-72 | 1.651E-70  | Stat3         |
| ENSMUSG000000030157 | 632.792   | 1.955 | 0.207 | 9.462  | 3.0E-21 | 5.8622E-20 | Clec2d        |
| ENSMUSG000000035279 | 53.777    | 1.954 | 0.715 | 2.734  | 6.2E-03 | 0.02076945 | Ssc5d         |
| ENSMUSG000000038564 | 687.708   | 1.953 | 0.247 | 7.905  | 2.7E-15 | 3.6205E-14 | Ift172        |
| ENSMUSG000000084399 | 70.423    | 1.953 | 0.722 | 2.703  | 6.9E-03 | 0.02257625 | Gm15666       |
| ENSMUSG000000081614 | 7.598     | 1.952 | 0.803 | 2.430  | 1.5E-02 | 0.0449469  | Gm9436        |
| ENSMUSG000000098609 | 29.876    | 1.951 | 0.748 | 2.610  | 9.1E-03 | 0.02866475 | Anxal1os      |
| ENSMUSG000000039285 | 10587.376 | 1.950 | 0.138 | 14.080 | 5.1E-45 | 2.4151E-43 | Azi2          |
| ENSMUSG000000000555 | 22979.266 | 1.949 | 0.114 | 17.050 | 3.5E-65 | 3.0042E-63 | Irga5         |
| ENSMUSG000000013846 | 2818.938  | 1.946 | 0.113 | 17.250 | 1.1E-66 | 1.0001E-64 | St3gal1       |
| ENSMUSG000000053442 | 16.639    | 1.945 | 0.741 | 2.624  | 8.7E-03 | 0.02769314 | 4930597O21Rik |
| ENSMUSG000000021591 | 26104.768 | 1.943 | 0.161 | 12.058 | 1.8E-33 | 5.7101E-32 | Glrx          |
| ENSMUSG000000105510 | 13.758    | 1.943 | 0.806 | 2.411  | 1.6E-02 | 0.04702077 | Gm43815       |
| ENSMUSG000000067203 | 1637.655  | 1.942 | 0.206 | 9.409  | 5.0E-21 | 9.5817E-20 | H2-K2         |
| ENSMUSG000000005362 | 2360.876  | 1.942 | 0.122 | 15.936 | 3.6E-57 | 2.4778E-55 | Crbn          |

|                    |           |       |       |        |          |            |               |
|--------------------|-----------|-------|-------|--------|----------|------------|---------------|
| ENSMUSG00000026942 | 6580.483  | 1.941 | 0.092 | 21.153 | 2.6E-99  | 4.4737E-97 | Traf2         |
| ENSMUSG00000105195 | 260.872   | 1.938 | 0.422 | 4.593  | 4.4E-06  | 2.5439E-05 | Gm43584       |
| ENSMUSG00000073805 | 84.511    | 1.934 | 0.442 | 4.374  | 1.2E-05  | 6.6514E-05 | Insyn2a       |
| ENSMUSG00000026121 | 1905.123  | 1.932 | 0.238 | 8.114  | 4.9E-16  | 6.9808E-15 | Sema4c        |
| ENSMUSG00000002033 | 35.614    | 1.930 | 0.694 | 2.783  | 5.4E-03  | 0.01822826 | Cd3g          |
| ENSMUSG00000053030 | 19.204    | 1.928 | 0.764 | 2.522  | 1.2E-02  | 0.03586507 | Spink2        |
| ENSMUSG00000054855 | 3648.836  | 1.927 | 0.223 | 8.630  | 6.1E-18  | 9.8686E-17 | Rnd1          |
| ENSMUSG00000104262 | 51.083    | 1.927 | 0.528 | 3.652  | 2.6E-04  | 0.00115375 | Gm37747       |
| ENSMUSG00000079033 | 89.126    | 1.927 | 0.768 | 2.510  | 1.2E-02  | 0.03696481 | Mef2b         |
| ENSMUSG00000020077 | 34172.705 | 1.926 | 0.107 | 17.991 | 2.3E-72  | 2.2792E-70 | Srgn          |
| ENSMUSG00000108120 | 88.015    | 1.924 | 0.527 | 3.651  | 2.6E-04  | 0.00115615 | 9930120I10Rik |
| ENSMUSG00000049037 | 20048.724 | 1.923 | 0.117 | 16.463 | 6.7E-61  | 5.0975E-59 | Clec4a1       |
| ENSMUSG00000020486 | 49.661    | 1.923 | 0.766 | 2.509  | 1.2E-02  | 0.0370546  | Septin4       |
| ENSMUSG00000096472 | 4841.950  | 1.922 | 0.149 | 12.912 | 3.9E-38  | 1.4874E-36 | Cdkn2d        |
| ENSMUSG00000024399 | 1112.823  | 1.920 | 0.163 | 11.772 | 5.4E-32  | 1.659E-30  | Ltb           |
| ENSMUSG00000023030 | 8666.956  | 1.920 | 0.114 | 16.800 | 2.4E-63  | 1.9869E-61 | Slc11a2       |
| ENSMUSG00000020363 | 1421.833  | 1.920 | 0.165 | 11.631 | 2.9E-31  | 8.4507E-30 | Gfpt2         |
| ENSMUSG00000058470 | 171.964   | 1.918 | 0.292 | 6.570  | 5.0E-11  | 4.9493E-10 | Gm8369        |
| ENSMUSG00000038301 | 21580.553 | 1.917 | 0.077 | 24.929 | 3.6E-137 | 1.405E-134 | Snx10         |
| ENSMUSG00000083341 | 16.036    | 1.917 | 0.561 | 3.416  | 6.4E-04  | 0.0026157  | Gm14238       |
| ENSMUSG00000103835 | 20.076    | 1.914 | 0.721 | 2.657  | 7.9E-03  | 0.02545804 | Gm37612       |
| ENSMUSG00000042751 | 98.176    | 1.913 | 0.451 | 4.240  | 2.2E-05  | 0.00011725 | Nmnat2        |
| ENSMUSG00000037995 | 102.489   | 1.913 | 0.485 | 3.942  | 8.1E-05  | 0.00038902 | Igsf9         |
| ENSMUSG00000108720 | 30.483    | 1.913 | 0.729 | 2.622  | 8.7E-03  | 0.02783722 | Gm44672       |
| ENSMUSG00000024079 | 8181.831  | 1.911 | 0.299 | 6.395  | 1.6E-10  | 1.5174E-09 | Eif2ak2       |
| ENSMUSG00000101199 | 19.476    | 1.911 | 0.717 | 2.666  | 7.7E-03  | 0.02480232 | Gm9687        |
| ENSMUSG00000020427 | 111.672   | 1.905 | 0.525 | 3.627  | 2.9E-04  | 0.00126121 | Igfbp3        |
| ENSMUSG00000079502 | 27.698    | 1.904 | 0.519 | 3.670  | 2.4E-04  | 0.00108143 | Cfap77        |
| ENSMUSG00000086638 | 27.096    | 1.902 | 0.636 | 2.990  | 2.8E-03  | 0.01011042 | 4930405A21Rik |
| ENSMUSG00000109244 | 112.740   | 1.902 | 0.463 | 4.112  | 3.9E-05  | 0.00019864 | Gm44751       |
| ENSMUSG00000032028 | 53.729    | 1.901 | 0.563 | 3.379  | 7.3E-04  | 0.00295969 | Nxpe2         |
| ENSMUSG00000030269 | 8227.241  | 1.901 | 0.115 | 16.582 | 9.4E-62  | 7.2849E-60 | Mtmr14        |
| ENSMUSG00000079889 | 261.020   | 1.899 | 0.270 | 7.021  | 2.2E-12  | 2.4204E-11 | Gm11951       |
| ENSMUSG00000026866 | 70.952    | 1.897 | 0.674 | 2.817  | 4.8E-03  | 0.01660073 | Kynu          |
| ENSMUSG00000083261 | 33.723    | 1.897 | 0.440 | 4.308  | 1.6E-05  | 8.8444E-05 | Gm7816        |
| ENSMUSG00000027962 | 18635.534 | 1.896 | 0.100 | 19.015 | 1.3E-80  | 1.5244E-78 | Vcam1         |
| ENSMUSG00000104720 | 24.179    | 1.896 | 0.731 | 2.593  | 9.5E-03  | 0.02992261 | Gm43138       |
| ENSMUSG00000018920 | 20940.294 | 1.894 | 0.113 | 16.698 | 1.3E-62  | 1.0701E-60 | Cxcl16        |
| ENSMUSG00000043279 | 2497.306  | 1.894 | 0.150 | 12.650 | 1.1E-36  | 4.0969E-35 | Trim56        |
| ENSMUSG00000042129 | 22690.993 | 1.893 | 0.114 | 16.662 | 2.5E-62  | 1.9705E-60 | Rassf4        |
| ENSMUSG00000028179 | 74.513    | 1.893 | 0.637 | 2.974  | 2.9E-03  | 0.01061432 | Cth           |
| ENSMUSG00000046718 | 49874.447 | 1.893 | 0.187 | 10.097 | 5.7E-24  | 1.249E-22  | Bst2          |
| ENSMUSG00000105965 | 144.095   | 1.892 | 0.223 | 8.499  | 1.9E-17  | 2.9805E-16 | Cycs-ps2      |
| ENSMUSG00000076618 | 10.240    | 1.892 | 0.772 | 2.451  | 1.4E-02  | 0.04272261 | Ighj4         |
| ENSMUSG00000062038 | 47.305    | 1.891 | 0.348 | 5.437  | 5.4E-08  | 3.9968E-07 | Gm10108       |
| ENSMUSG00000016494 | 691.548   | 1.888 | 0.191 | 9.897  | 4.3E-23  | 9.0746E-22 | Cd34          |
| ENSMUSG00000029379 | 3228.992  | 1.887 | 0.318 | 5.937  | 2.9E-09  | 2.4532E-08 | Cxcl3         |
| ENSMUSG00000023952 | 3145.651  | 1.887 | 0.136 | 13.878 | 8.6E-44  | 3.9469E-42 | Gtpbp2        |
| ENSMUSG00000070730 | 2570.801  | 1.886 | 0.141 | 13.422 | 4.5E-41  | 1.9163E-39 | Rmdn3         |
| ENSMUSG00000028536 | 96.966    | 1.886 | 0.481 | 3.921  | 8.8E-05  | 0.00042232 | 2610528J11Rik |
| ENSMUSG00000113589 | 15.448    | 1.885 | 0.688 | 2.740  | 6.1E-03  | 0.02045082 | Gm48374       |
| ENSMUSG00000037826 | 1143.265  | 1.885 | 0.268 | 7.030  | 2.1E-12  | 2.2733E-11 | Ppm1k         |

|                     |           |       |       |        |          |            |               |
|---------------------|-----------|-------|-------|--------|----------|------------|---------------|
| ENSMUSG00000038467  | 4507.326  | 1.882 | 0.166 | 11.360 | 6.6E-30  | 1.8504E-28 | Chmp4b        |
| ENSMUSG00000007987  | 2499.778  | 1.881 | 0.142 | 13.205 | 8.2E-40  | 3.3388E-38 | Ift22         |
| ENSMUSG00000056220  | 4997.509  | 1.881 | 0.134 | 14.058 | 6.9E-45  | 3.2612E-43 | Pla2g4a       |
| ENSMUSG00000082394  | 13.695    | 1.880 | 0.673 | 2.794  | 5.2E-03  | 0.01767805 | Gm4596        |
| ENSMUSG00000085894  | 173.880   | 1.880 | 0.297 | 6.340  | 2.3E-10  | 2.1496E-09 | Gm15832       |
| ENSMUSG00000082179  | 8.974     | 1.880 | 0.714 | 2.634  | 8.4E-03  | 0.02701892 | Gm11407       |
| ENSMUSG00000034271  | 131.449   | 1.880 | 0.385 | 4.879  | 1.1E-06  | 6.6729E-06 | Jdp2          |
| ENSMUSG00000026827  | 5826.299  | 1.880 | 0.123 | 15.337 | 4.3E-53  | 2.6313E-51 | Gpd2          |
| ENSMUSG00000033088  | 7789.038  | 1.878 | 0.099 | 18.880 | 1.7E-79  | 1.9306E-77 | Triobp        |
| ENSMUSG00000057143  | 1318.612  | 1.876 | 0.200 | 9.394  | 5.8E-21  | 1.0993E-19 | Trim12c       |
| ENSMUSG00000027808  | 45999.202 | 1.876 | 0.096 | 19.571 | 2.7E-85  | 3.6008E-83 | Serp1         |
| ENSMUSG00000016528  | 40205.552 | 1.875 | 0.083 | 22.522 | 2.5E-112 | 5.965E-110 | Mapkapk2      |
| ENSMUSG00000073902  | 941.756   | 1.873 | 0.220 | 8.510  | 1.7E-17  | 2.7085E-16 | Gvin3         |
| ENSMUSG00000084362  | 39.579    | 1.873 | 0.575 | 3.256  | 1.1E-03  | 0.00445223 | 2610024D14Rik |
| ENSMUSG00000063800  | 3661.668  | 1.873 | 0.130 | 14.365 | 8.6E-47  | 4.2861E-45 | Prpf38a       |
| ENSMUSG00000038497  | 3169.351  | 1.872 | 0.142 | 13.226 | 6.2E-40  | 2.5451E-38 | Tmco3         |
| ENSMUSG000000115116 | 18.209    | 1.871 | 0.487 | 3.839  | 1.2E-04  | 0.00057778 | Gm46496       |
| ENSMUSG00000031429  | 4683.269  | 1.866 | 0.100 | 18.654 | 1.2E-77  | 1.3218E-75 | Psmid10       |
| ENSMUSG00000076939  | 35.130    | 1.865 | 0.582 | 3.204  | 1.4E-03  | 0.00524185 | IgIv3         |
| ENSMUSG00000015340  | 78696.481 | 1.855 | 0.085 | 21.909 | 2.1E-106 | 4.497E-104 | Cybb          |
| ENSMUSG00000021109  | 12142.647 | 1.854 | 0.125 | 14.774 | 2.2E-49  | 1.1764E-47 | Hif1a         |
| ENSMUSG00000041936  | 361.824   | 1.854 | 0.367 | 5.055  | 4.3E-07  | 2.8282E-06 | Agm           |
| ENSMUSG00000038256  | 1762.061  | 1.853 | 0.211 | 8.764  | 1.9E-18  | 3.1396E-17 | Bcl9          |
| ENSMUSG00000036206  | 1305.346  | 1.852 | 0.195 | 9.489  | 2.3E-21  | 4.5659E-20 | Sh3bp4        |
| ENSMUSG00000023868  | 116.988   | 1.849 | 0.701 | 2.637  | 8.4E-03  | 0.02678728 | Pde10a        |
| ENSMUSG00000095028  | 518.309   | 1.847 | 0.188 | 9.813  | 9.9E-23  | 2.053E-21  | Sirpb1b       |
| ENSMUSG00000017412  | 30.322    | 1.847 | 0.766 | 2.412  | 1.6E-02  | 0.04688099 | Cacnb4        |
| ENSMUSG00000079505  | 382.532   | 1.846 | 0.296 | 6.229  | 4.7E-10  | 4.2468E-09 | Gm11131       |
| ENSMUSG000000114048 | 27.629    | 1.845 | 0.714 | 2.583  | 9.8E-03  | 0.03067029 | 4930549C15Rik |
| ENSMUSG00000034394  | 485.377   | 1.845 | 0.379 | 4.865  | 1.1E-06  | 7.1387E-06 | Lif           |
| ENSMUSG00000029380  | 3846.448  | 1.844 | 0.308 | 5.995  | 2.0E-09  | 1.7379E-08 | Cxcl1         |
| ENSMUSG00000070942  | 281.855   | 1.841 | 0.289 | 6.381  | 1.8E-10  | 1.6557E-09 | Il1rl2        |
| ENSMUSG00000070427  | 8694.214  | 1.835 | 0.162 | 11.314 | 1.1E-29  | 3.1396E-28 | Il18bp        |
| ENSMUSG00000043036  | 36.393    | 1.833 | 0.581 | 3.154  | 1.6E-03  | 0.00614434 | Ccdc63        |
| ENSMUSG000000113144 | 11.586    | 1.832 | 0.638 | 2.870  | 4.1E-03  | 0.01429746 | Gm2754        |
| ENSMUSG00000002578  | 69.347    | 1.831 | 0.624 | 2.937  | 3.3E-03  | 0.01181799 | Ikzf4         |
| ENSMUSG00000026466  | 11374.316 | 1.831 | 0.143 | 12.808 | 1.5E-37  | 5.5988E-36 | Tor1aip1      |
| ENSMUSG00000010453  | 4470.124  | 1.829 | 0.155 | 11.804 | 3.7E-32  | 1.1405E-30 | Kansl3        |
| ENSMUSG00000026166  | 205.539   | 1.829 | 0.512 | 3.572  | 3.5E-04  | 0.0015322  | Ccl20         |
| ENSMUSG00000004837  | 753.711   | 1.828 | 0.243 | 7.514  | 5.7E-14  | 7.0949E-13 | Grap          |
| ENSMUSG00000085586  | 182.883   | 1.826 | 0.357 | 5.117  | 3.1E-07  | 2.0834E-06 | Gm11613       |
| ENSMUSG00000040488  | 42.726    | 1.826 | 0.564 | 3.240  | 1.2E-03  | 0.0046812  | Ltbp4         |
| ENSMUSG00000020393  | 3330.796  | 1.825 | 0.140 | 12.993 | 1.3E-38  | 5.2113E-37 | Kremen1       |
| ENSMUSG00000021565  | 91.084    | 1.824 | 0.747 | 2.443  | 1.5E-02  | 0.04350382 | Slc6a19       |
| ENSMUSG00000001348  | 16359.727 | 1.823 | 0.112 | 16.322 | 6.9E-60  | 5.0956E-58 | Acp5          |
| ENSMUSG00000006418  | 20105.647 | 1.822 | 0.166 | 10.986 | 4.5E-28  | 1.1668E-26 | Rnfl14        |
| ENSMUSG00000042350  | 2694.350  | 1.822 | 0.154 | 11.839 | 2.4E-32  | 7.5984E-31 | Arell1        |
| ENSMUSG00000020564  | 3379.506  | 1.818 | 0.141 | 12.872 | 6.5E-38  | 2.4751E-36 | Atxn711       |
| ENSMUSG00000034881  | 270.538   | 1.818 | 0.338 | 5.377  | 7.6E-08  | 5.5006E-07 | Tbxa2r        |
| ENSMUSG00000001444  | 85.110    | 1.817 | 0.570 | 3.190  | 1.4E-03  | 0.00549149 | Tbx21         |
| ENSMUSG000000106149 | 135.627   | 1.817 | 0.317 | 5.736  | 9.7E-09  | 7.7498E-08 | Gm43430       |
| ENSMUSG00000032014  | 2565.771  | 1.816 | 0.148 | 12.292 | 1.0E-34  | 3.3952E-33 | Oaf           |

|                    |           |       |       |        |          |            |               |
|--------------------|-----------|-------|-------|--------|----------|------------|---------------|
| ENSMUSG00000033220 | 55206.972 | 1.816 | 0.058 | 31.225 | 4.8E-214 | 5.801E-211 | Rac2          |
| ENSMUSG00000036273 | 397.232   | 1.816 | 0.251 | 7.233  | 4.7E-13  | 5.4953E-12 | Lrrk2         |
| ENSMUSG00000096917 | 239.682   | 1.815 | 0.275 | 6.607  | 3.9E-11  | 3.8855E-10 | 2500002B13Rik |
| ENSMUSG00000033355 | 29790.752 | 1.815 | 0.313 | 5.799  | 6.7E-09  | 5.4176E-08 | Rtp4          |
| ENSMUSG00000034248 | 3988.166  | 1.815 | 0.133 | 13.671 | 1.5E-42  | 6.7499E-41 | Slc25a37      |
| ENSMUSG00000027188 | 61.265    | 1.813 | 0.658 | 2.756  | 5.8E-03  | 0.01957277 | Pamr1         |
| ENSMUSG00000066684 | 2078.298  | 1.813 | 0.116 | 15.594 | 8.0E-55  | 5.1237E-53 | Pilrb1        |
| ENSMUSG00000004936 | 24047.667 | 1.813 | 0.111 | 16.354 | 4.1E-60  | 3.034E-58  | Map2k1        |
| ENSMUSG00000038963 | 685.922   | 1.813 | 0.260 | 6.980  | 2.9E-12  | 3.2087E-11 | Slco4a1       |
| ENSMUSG00000028527 | 788.030   | 1.807 | 0.137 | 13.158 | 1.5E-39  | 6.1454E-38 | Ak4           |
| ENSMUSG00000027253 | 961.145   | 1.803 | 0.135 | 13.397 | 6.3E-41  | 2.6549E-39 | Lrp4          |
| ENSMUSG00000114459 | 11.359    | 1.803 | 0.616 | 2.929  | 3.4E-03  | 0.01209706 | Gm2736        |
| ENSMUSG00000078566 | 2873.335  | 1.801 | 0.114 | 15.760 | 5.9E-56  | 3.8546E-54 | Bnip3         |
| ENSMUSG00000080839 | 46.173    | 1.797 | 0.348 | 5.165  | 2.4E-07  | 1.6365E-06 | Gm11625       |
| ENSMUSG00000024424 | 3299.423  | 1.796 | 0.110 | 16.315 | 7.8E-60  | 5.664E-58  | Ttc39c        |
| ENSMUSG00000039678 | 1113.657  | 1.795 | 0.194 | 9.272  | 1.8E-20  | 3.4096E-19 | Tbc1d13       |
| ENSMUSG00000039395 | 445.764   | 1.792 | 0.239 | 7.492  | 6.8E-14  | 8.3493E-13 | Mreg          |
| ENSMUSG00000046245 | 8443.928  | 1.791 | 0.130 | 13.811 | 2.2E-43  | 9.814E-42  | Pilra         |
| ENSMUSG00000099843 | 454.434   | 1.790 | 0.229 | 7.817  | 5.4E-15  | 7.0945E-14 | Gm7160        |
| ENSMUSG00000082816 | 15.184    | 1.790 | 0.576 | 3.109  | 1.9E-03  | 0.00705494 | Gm11953       |
| ENSMUSG00000054065 | 242.697   | 1.789 | 0.332 | 5.394  | 6.9E-08  | 5.0247E-07 | Pkp3          |
| ENSMUSG00000079737 | 448.945   | 1.789 | 0.341 | 5.253  | 1.5E-07  | 1.0478E-06 | 3110001I22Rik |
| ENSMUSG00000027641 | 1590.876  | 1.788 | 0.200 | 8.930  | 4.3E-19  | 7.3587E-18 | Rbl1          |
| ENSMUSG00000024235 | 3521.452  | 1.785 | 0.130 | 13.735 | 6.2E-43  | 2.7916E-41 | Map3k8        |
| ENSMUSG00000035671 | 2824.885  | 1.785 | 0.164 | 10.904 | 1.1E-27  | 2.834E-26  | Zswim4        |
| ENSMUSG00000052566 | 1483.869  | 1.783 | 0.222 | 8.042  | 8.9E-16  | 1.2375E-14 | Hook2         |
| ENSMUSG00000097572 | 123.729   | 1.782 | 0.457 | 3.902  | 9.5E-05  | 0.00045333 | Gm26797       |
| ENSMUSG00000020901 | 11607.524 | 1.779 | 0.131 | 13.574 | 5.7E-42  | 2.4983E-40 | Pik3r5        |
| ENSMUSG00000036006 | 1364.864  | 1.777 | 0.201 | 8.837  | 9.9E-19  | 1.6631E-17 | Ripor2        |
| ENSMUSG00000020476 | 21690.353 | 1.776 | 0.091 | 19.556 | 3.7E-85  | 4.8281E-83 | Dbnl          |
| ENSMUSG00000109751 | 56.820    | 1.774 | 0.444 | 3.995  | 6.5E-05  | 0.00031732 | Gm45479       |
| ENSMUSG00000039693 | 987.778   | 1.770 | 0.178 | 9.949  | 2.5E-23  | 5.4182E-22 | Msantd3       |
| ENSMUSG00000108929 | 30.578    | 1.768 | 0.594 | 2.974  | 2.9E-03  | 0.01060937 | Cc2d2b        |
| ENSMUSG00000030401 | 105.074   | 1.768 | 0.481 | 3.673  | 2.4E-04  | 0.00106977 | Rtn2          |
| ENSMUSG00000105547 | 125.168   | 1.763 | 0.473 | 3.728  | 1.9E-04  | 0.00087396 | Ig1c3         |
| ENSMUSG00000025010 | 998.187   | 1.762 | 0.189 | 9.340  | 9.6E-21  | 1.8101E-19 | Ccnj          |
| ENSMUSG00000099757 | 1724.942  | 1.761 | 0.213 | 8.263  | 1.4E-16  | 2.0814E-15 | BE692007      |
| ENSMUSG00000046417 | 447.485   | 1.760 | 0.214 | 8.221  | 2.0E-16  | 2.9429E-15 | Lrrc75a       |
| ENSMUSG00000026580 | 948.646   | 1.760 | 0.200 | 8.783  | 1.6E-18  | 2.6523E-17 | Selp          |
| ENSMUSG00000109679 | 31.591    | 1.760 | 0.733 | 2.400  | 1.6E-02  | 0.04828498 | Gm45342       |
| ENSMUSG00000106543 | 19.925    | 1.760 | 0.678 | 2.595  | 9.5E-03  | 0.02975689 | Gm43378       |
| ENSMUSG00000025491 | 2223.155  | 1.757 | 0.263 | 6.674  | 2.5E-11  | 2.4961E-10 | Ifitm1        |
| ENSMUSG00000028163 | 3411.681  | 1.757 | 0.141 | 12.458 | 1.3E-35  | 4.4199E-34 | Nfkb1         |
| ENSMUSG00000097177 | 91.583    | 1.754 | 0.304 | 5.778  | 7.6E-09  | 6.1062E-08 | 9330159M07Rik |
| ENSMUSG00000039196 | 202.551   | 1.750 | 0.416 | 4.205  | 2.6E-05  | 0.00013569 | Orm1          |
| ENSMUSG00000022946 | 1994.644  | 1.750 | 0.147 | 11.871 | 1.7E-32  | 5.2133E-31 | Dop1b         |
| ENSMUSG00000033368 | 20.326    | 1.744 | 0.702 | 2.485  | 1.3E-02  | 0.03927685 | Trim69        |
| ENSMUSG00000010651 | 13.884    | 1.743 | 0.649 | 2.687  | 7.2E-03  | 0.02350044 | Acaa1b        |
| ENSMUSG00000027009 | 2170.936  | 1.743 | 0.182 | 9.564  | 1.1E-21  | 2.2349E-20 | Irga4         |
| ENSMUSG00000085823 | 240.187   | 1.742 | 0.240 | 7.270  | 3.6E-13  | 4.2119E-12 | Gm13012       |
| ENSMUSG00000024334 | 79.268    | 1.742 | 0.378 | 4.603  | 4.2E-06  | 2.4384E-05 | H2-Oa         |
| ENSMUSG00000027281 | 813.169   | 1.741 | 0.157 | 11.102 | 1.2E-28  | 3.2777E-27 | Slx4ip        |

|                    |           |       |       |        |          |            |           |
|--------------------|-----------|-------|-------|--------|----------|------------|-----------|
| ENSMUSG00000074071 | 107.977   | 1.734 | 0.397 | 4.372  | 1.2E-05  | 6.7266E-05 | Fam169b   |
| ENSMUSG00000032175 | 5136.585  | 1.733 | 0.134 | 12.916 | 3.6E-38  | 1.4026E-36 | Tyk2      |
| ENSMUSG00000023991 | 2728.276  | 1.731 | 0.133 | 13.023 | 9.1E-39  | 3.5788E-37 | Foxp4     |
| ENSMUSG00000031728 | 1886.487  | 1.731 | 0.187 | 9.266  | 1.9E-20  | 3.5917E-19 | Zfp821    |
| ENSMUSG00000032204 | 200.220   | 1.729 | 0.427 | 4.052  | 5.1E-05  | 0.00025375 | Aqp9      |
| ENSMUSG00000029075 | 59.081    | 1.729 | 0.665 | 2.600  | 9.3E-03  | 0.02939744 | Tnfrsf4   |
| ENSMUSG00000066682 | 2000.385  | 1.728 | 0.120 | 14.414 | 4.3E-47  | 2.162E-45  | Pilrb2    |
| ENSMUSG00000080832 | 65.666    | 1.728 | 0.332 | 5.207  | 1.9E-07  | 1.3208E-06 | M6pr-ps   |
| ENSMUSG00000006411 | 2445.128  | 1.728 | 0.337 | 5.130  | 2.9E-07  | 1.9565E-06 | Nectin4   |
| ENSMUSG00000049988 | 28286.116 | 1.727 | 0.078 | 22.285 | 5.2E-110 | 1.143E-107 | Lrrc25    |
| ENSMUSG00000022489 | 814.461   | 1.726 | 0.187 | 9.248  | 2.3E-20  | 4.2359E-19 | Pde1b     |
| ENSMUSG00000042901 | 2668.956  | 1.726 | 0.139 | 12.457 | 1.3E-35  | 4.4789E-34 | Aida      |
| ENSMUSG00000004609 | 2277.367  | 1.725 | 0.137 | 12.573 | 3.0E-36  | 1.071E-34  | Cd33      |
| ENSMUSG00000013974 | 2802.622  | 1.724 | 0.206 | 8.363  | 6.1E-17  | 9.2009E-16 | Mccmp1    |
| ENSMUSG00000032038 | 1932.704  | 1.723 | 0.104 | 16.633 | 4.0E-62  | 3.1611E-60 | St3gal4   |
| ENSMUSG00000087263 | 54.229    | 1.722 | 0.456 | 3.777  | 1.6E-04  | 0.00073096 | Gm15726   |
| ENSMUSG00000005774 | 406.522   | 1.722 | 0.207 | 8.330  | 8.1E-17  | 1.2081E-15 | Rfx5      |
| ENSMUSG00000090164 | 661.025   | 1.717 | 0.263 | 6.518  | 7.1E-11  | 6.9129E-10 | BC035044  |
| ENSMUSG00000051124 | 97.828    | 1.717 | 0.545 | 3.150  | 1.6E-03  | 0.00620452 | Gimap9    |
| ENSMUSG00000089931 | 23.582    | 1.715 | 0.694 | 2.470  | 1.3E-02  | 0.04068692 | Gm8459    |
| ENSMUSG00000031609 | 10652.013 | 1.713 | 0.104 | 16.480 | 5.1E-61  | 3.8734E-59 | Sap30     |
| ENSMUSG00000039911 | 7141.522  | 1.711 | 0.148 | 11.559 | 6.7E-31  | 1.9551E-29 | Spsb1     |
| ENSMUSG00000032712 | 11036.537 | 1.709 | 0.120 | 14.266 | 3.6E-46  | 1.7524E-44 | Resf1     |
| ENSMUSG00000025161 | 14596.400 | 1.708 | 0.103 | 16.642 | 3.5E-62  | 2.7017E-60 | Slc16a3   |
| ENSMUSG00000031539 | 2131.119  | 1.707 | 0.139 | 12.244 | 1.8E-34  | 6.0814E-33 | Ap3m2     |
| ENSMUSG00000114174 | 13.756    | 1.705 | 0.623 | 2.740  | 6.1E-03  | 0.02047528 | Cycs-ps3  |
| ENSMUSG00000030681 | 15252.394 | 1.705 | 0.116 | 14.708 | 5.7E-49  | 3.0476E-47 | Mvp       |
| ENSMUSG00000034911 | 25.241    | 1.700 | 0.645 | 2.638  | 8.3E-03  | 0.02673249 | Ushbp1    |
| ENSMUSG00000036718 | 1734.132  | 1.700 | 0.130 | 13.081 | 4.2E-39  | 1.6879E-37 | Mical12   |
| ENSMUSG00000111752 | 42.384    | 1.699 | 0.584 | 2.911  | 3.6E-03  | 0.01271342 | Gm38575   |
| ENSMUSG00000018986 | 442.428   | 1.698 | 0.496 | 3.424  | 6.2E-04  | 0.0025459  | Slfn3     |
| ENSMUSG00000014602 | 135.363   | 1.697 | 0.434 | 3.910  | 9.2E-05  | 0.00044063 | Kif1a     |
| ENSMUSG00000056476 | 148.997   | 1.697 | 0.324 | 5.245  | 1.6E-07  | 1.0897E-06 | Med121    |
| ENSMUSG00000050490 | 200.780   | 1.697 | 0.176 | 9.657  | 4.6E-22  | 9.2617E-21 | Psma5-ps  |
| ENSMUSG00000094320 | 49.276    | 1.696 | 0.389 | 4.360  | 1.3E-05  | 7.0911E-05 | Chchd2-ps |
| ENSMUSG00000032503 | 60.946    | 1.696 | 0.514 | 3.296  | 9.8E-04  | 0.0038948  | Arpp21    |
| ENSMUSG00000024371 | 34.027    | 1.695 | 0.577 | 2.938  | 3.3E-03  | 0.01178603 | C2        |
| ENSMUSG00000057191 | 11061.079 | 1.694 | 0.108 | 15.649 | 3.4E-55  | 2.1625E-53 | AB124611  |
| ENSMUSG00000079659 | 4010.477  | 1.692 | 0.126 | 13.462 | 2.6E-41  | 1.1135E-39 | Tmem243   |
| ENSMUSG00000029314 | 125.932   | 1.691 | 0.369 | 4.581  | 4.6E-06  | 2.6751E-05 | Gpat3     |
| ENSMUSG00000028410 | 8008.134  | 1.686 | 0.086 | 19.654 | 5.4E-86  | 7.3116E-84 | Dnaj1     |
| ENSMUSG00000035232 | 3058.353  | 1.685 | 0.126 | 13.336 | 1.4E-40  | 5.9518E-39 | Pdk3      |
| ENSMUSG00000042345 | 368.698   | 1.682 | 0.296 | 5.689  | 1.3E-08  | 1.0062E-07 | Ubash3a   |
| ENSMUSG00000035299 | 150.006   | 1.678 | 0.262 | 6.413  | 1.4E-10  | 1.3555E-09 | Mid1      |
| ENSMUSG00000020668 | 573.194   | 1.677 | 0.209 | 8.015  | 1.1E-15  | 1.5262E-14 | Kif3c     |
| ENSMUSG00000059301 | 19.331    | 1.676 | 0.543 | 3.086  | 2.0E-03  | 0.00757923 | Gm5434    |
| ENSMUSG00000029875 | 89.215    | 1.675 | 0.597 | 2.807  | 5.0E-03  | 0.01707116 | Ccdc184   |
| ENSMUSG00000026112 | 10961.195 | 1.674 | 0.110 | 15.162 | 6.3E-52  | 3.677E-50  | Coa5      |
| ENSMUSG00000052837 | 66071.299 | 1.674 | 0.091 | 18.375 | 2.1E-75  | 2.2366E-73 | Junb      |
| ENSMUSG00000020656 | 96.320    | 1.673 | 0.612 | 2.734  | 6.3E-03  | 0.0207718  | Grh11     |
| ENSMUSG00000046688 | 8331.980  | 1.672 | 0.102 | 16.372 | 3.1E-60  | 2.2932E-58 | Tifa      |
| ENSMUSG00000019866 | 1986.029  | 1.668 | 0.153 | 10.902 | 1.1E-27  | 2.8926E-26 | Crybg1    |

|                    |           |       |       |        |          |            |               |
|--------------------|-----------|-------|-------|--------|----------|------------|---------------|
| ENSMUSG00000038555 | 220.608   | 1.666 | 0.459 | 3.630  | 2.8E-04  | 0.00124944 | Reep2         |
| ENSMUSG00000037872 | 80.956    | 1.665 | 0.501 | 3.325  | 8.9E-04  | 0.00354244 | Ackr1         |
| ENSMUSG00000089999 | 123.911   | 1.665 | 0.243 | 6.848  | 7.5E-12  | 7.8591E-11 | Gm6485        |
| ENSMUSG00000022867 | 12137.047 | 1.665 | 0.105 | 15.794 | 3.4E-56  | 2.2545E-54 | Usp25         |
| ENSMUSG00000086782 | 109.918   | 1.664 | 0.337 | 4.944  | 7.7E-07  | 4.8816E-06 | E130102H24Rik |
| ENSMUSG00000062794 | 43.335    | 1.662 | 0.568 | 2.923  | 3.5E-03  | 0.0122778  | Zfp599        |
| ENSMUSG00000036661 | 260.535   | 1.661 | 0.366 | 4.544  | 5.5E-06  | 3.171E-05  | Dennd3        |
| ENSMUSG00000113165 | 164.155   | 1.659 | 0.269 | 6.169  | 6.9E-10  | 6.157E-09  | Gm47863       |
| ENSMUSG00000033282 | 178.702   | 1.658 | 0.336 | 4.928  | 8.3E-07  | 5.2616E-06 | Rpgrip11      |
| ENSMUSG00000115662 | 190.903   | 1.657 | 0.301 | 5.514  | 3.5E-08  | 2.6481E-07 | Gm7232        |
| ENSMUSG00000031805 | 2154.749  | 1.657 | 0.177 | 9.343  | 9.4E-21  | 1.7612E-19 | Jak3          |
| ENSMUSG00000041115 | 1801.445  | 1.657 | 0.169 | 9.833  | 8.1E-23  | 1.6884E-21 | Iqsec2        |
| ENSMUSG00000028412 | 5725.135  | 1.655 | 0.158 | 10.473 | 1.2E-25  | 2.71E-24   | Slc44a1       |
| ENSMUSG00000100033 | 146.161   | 1.654 | 0.207 | 7.975  | 1.5E-15  | 2.0836E-14 | Gm8337        |
| ENSMUSG00000026979 | 13153.508 | 1.652 | 0.104 | 15.817 | 2.4E-56  | 1.5746E-54 | Psd4          |
| ENSMUSG00000022831 | 25391.078 | 1.652 | 0.070 | 23.447 | 1.4E-121 | 4.419E-119 | Hcls1         |
| ENSMUSG00000072244 | 271.686   | 1.652 | 0.199 | 8.310  | 9.6E-17  | 1.4283E-15 | Trim6         |
| ENSMUSG00000091421 | 1136.683  | 1.652 | 0.299 | 5.530  | 3.2E-08  | 2.4119E-07 | Gm4202        |
| ENSMUSG00000026672 | 1873.142  | 1.651 | 0.121 | 13.610 | 3.5E-42  | 1.5399E-40 | Optrn         |
| ENSMUSG00000028028 | 1313.543  | 1.648 | 0.190 | 8.664  | 4.6E-18  | 7.3978E-17 | Alpk1         |
| ENSMUSG00000060002 | 2946.534  | 1.648 | 0.197 | 8.370  | 5.7E-17  | 8.6751E-16 | Chpt1         |
| ENSMUSG00000038866 | 1178.860  | 1.648 | 0.214 | 7.687  | 1.5E-14  | 1.9261E-13 | Zcchc2        |
| ENSMUSG00000061062 | 165.268   | 1.648 | 0.276 | 5.977  | 2.3E-09  | 1.9277E-08 | Hdac1-ps      |
| ENSMUSG00000027951 | 6374.463  | 1.648 | 0.203 | 8.123  | 4.6E-16  | 6.504E-15  | Adar          |
| ENSMUSG00000036225 | 290.668   | 1.647 | 0.316 | 5.219  | 1.8E-07  | 1.2488E-06 | Kctd1         |
| ENSMUSG00000041598 | 2867.722  | 1.646 | 0.108 | 15.215 | 2.8E-52  | 1.6551E-50 | Cdc42ep4      |
| ENSMUSG00000002847 | 322.305   | 1.646 | 0.265 | 6.219  | 5.0E-10  | 4.5041E-09 | Pla1a         |
| ENSMUSG00000032265 | 14038.448 | 1.646 | 0.143 | 11.481 | 1.6E-30  | 4.7624E-29 | Tent5a        |
| ENSMUSG00000026421 | 15766.131 | 1.641 | 0.094 | 17.456 | 3.1E-68  | 2.9057E-66 | Csrp1         |
| ENSMUSG00000078780 | 1258.470  | 1.640 | 0.188 | 8.712  | 3.0E-18  | 4.8876E-17 | Gm5150        |
| ENSMUSG00000026639 | 46.249    | 1.640 | 0.594 | 2.760  | 5.8E-03  | 0.01936378 | Lamb3         |
| ENSMUSG00000101567 | 524.476   | 1.639 | 0.121 | 13.499 | 1.6E-41  | 6.8131E-40 | Txn-ps1       |
| ENSMUSG00000003541 | 15812.368 | 1.635 | 0.117 | 14.032 | 1.0E-44  | 4.7039E-43 | Ier3          |
| ENSMUSG00000047810 | 3129.515  | 1.634 | 0.144 | 11.357 | 6.8E-30  | 1.9182E-28 | Ccdc88b       |
| ENSMUSG00000071537 | 177.002   | 1.634 | 0.387 | 4.220  | 2.4E-05  | 0.00012732 | Klrg2         |
| ENSMUSG00000083836 | 30.663    | 1.630 | 0.623 | 2.617  | 8.9E-03  | 0.02816879 | Ldha-ps2      |
| ENSMUSG00000029534 | 1038.455  | 1.630 | 0.138 | 11.853 | 2.1E-32  | 6.5202E-31 | St7           |
| ENSMUSG00000109428 | 24.654    | 1.630 | 0.587 | 2.776  | 5.5E-03  | 0.01856733 | Gm45698       |
| ENSMUSG00000060538 | 4265.185  | 1.624 | 0.143 | 11.334 | 8.9E-30  | 2.4783E-28 | Tmem219       |
| ENSMUSG00000053398 | 4581.877  | 1.623 | 0.108 | 15.030 | 4.6E-51  | 2.6531E-49 | Phgdh         |
| ENSMUSG00000031586 | 3834.601  | 1.622 | 0.089 | 18.274 | 1.3E-74  | 1.3996E-72 | Rbpms         |
| ENSMUSG00000038774 | 2255.739  | 1.621 | 0.157 | 10.304 | 6.8E-25  | 1.5406E-23 | Ascc3         |
| ENSMUSG00000100025 | 47.136    | 1.621 | 0.372 | 4.353  | 1.3E-05  | 7.3042E-05 | Gm8141        |
| ENSMUSG00000055172 | 528.292   | 1.620 | 0.154 | 10.534 | 6.0E-26  | 1.4275E-24 | C1ra          |
| ENSMUSG00000113600 | 33.749    | 1.619 | 0.376 | 4.304  | 1.7E-05  | 8.9864E-05 | Gm7868        |
| ENSMUSG00000021360 | 880.533   | 1.618 | 0.187 | 8.655  | 4.9E-18  | 7.9676E-17 | Gcnt2         |
| ENSMUSG00000048827 | 23.975    | 1.618 | 0.655 | 2.472  | 1.3E-02  | 0.0405927  | Pkd113        |
| ENSMUSG00000071637 | 14058.502 | 1.618 | 0.083 | 19.606 | 1.4E-85  | 1.8525E-83 | Cebpd         |
| ENSMUSG00000107211 | 38.720    | 1.617 | 0.427 | 3.786  | 1.5E-04  | 0.00070627 | Gm5864        |
| ENSMUSG00000116946 | 105.442   | 1.615 | 0.310 | 5.212  | 1.9E-07  | 1.2906E-06 | Gm41442       |
| ENSMUSG00000030108 | 136.109   | 1.614 | 0.270 | 5.985  | 2.2E-09  | 1.8438E-08 | Slc6a13       |
| ENSMUSG00000114828 | 39.910    | 1.613 | 0.544 | 2.964  | 3.0E-03  | 0.01090677 | AI463229      |

|                    |           |       |       |        |          |            |           |
|--------------------|-----------|-------|-------|--------|----------|------------|-----------|
| ENSMUSG00000056692 | 10706.777 | 1.607 | 0.151 | 10.615 | 2.5E-26  | 6.1332E-25 | Ilrun     |
| ENSMUSG00000100801 | 710.400   | 1.607 | 0.136 | 11.776 | 5.2E-32  | 1.5851E-30 | Gm15459   |
| ENSMUSG00000065651 | 35.302    | 1.606 | 0.460 | 3.494  | 4.8E-04  | 0.00199956 | Gm25973   |
| ENSMUSG00000021067 | 572.430   | 1.606 | 0.256 | 6.284  | 3.3E-10  | 3.0378E-09 | Sav1      |
| ENSMUSG00000000275 | 11107.692 | 1.606 | 0.163 | 9.843  | 7.3E-23  | 1.5393E-21 | Trim25    |
| ENSMUSG00000081255 | 15.423    | 1.600 | 0.591 | 2.706  | 6.8E-03  | 0.02238682 | Gm5380    |
| ENSMUSG00000035258 | 31.947    | 1.600 | 0.611 | 2.619  | 8.8E-03  | 0.02807176 | Abi3bp    |
| ENSMUSG00000107951 | 561.694   | 1.599 | 0.151 | 10.594 | 3.2E-26  | 7.6025E-25 | Gm6210    |
| ENSMUSG00000039116 | 262.506   | 1.599 | 0.384 | 4.167  | 3.1E-05  | 0.00015828 | Adgrg6    |
| ENSMUSG00000006389 | 1096.690  | 1.595 | 0.252 | 6.322  | 2.6E-10  | 2.4003E-09 | Mpl       |
| ENSMUSG00000114369 | 208.306   | 1.593 | 0.314 | 5.077  | 3.8E-07  | 2.5426E-06 | Gm41077   |
| ENSMUSG00000031538 | 496.684   | 1.593 | 0.249 | 6.393  | 1.6E-10  | 1.5333E-09 | Plat      |
| ENSMUSG00000102559 | 34.885    | 1.593 | 0.480 | 3.318  | 9.1E-04  | 0.00361819 | Gm37570   |
| ENSMUSG00000031304 | 7674.294  | 1.591 | 0.146 | 10.896 | 1.2E-27  | 3.0729E-26 | Il2rg     |
| ENSMUSG00000055447 | 38706.251 | 1.591 | 0.094 | 16.988 | 1.0E-64  | 8.5553E-63 | Cd47      |
| ENSMUSG00000114733 | 17.806    | 1.589 | 0.646 | 2.459  | 1.4E-02  | 0.0419001  | Gm4815    |
| ENSMUSG00000030257 | 108.426   | 1.589 | 0.457 | 3.480  | 5.0E-04  | 0.00210082 | Srgap3    |
| ENSMUSG00000028643 | 3666.735  | 1.587 | 0.119 | 13.312 | 2.0E-40  | 8.1589E-39 | Svbp      |
| ENSMUSG00000021457 | 12766.050 | 1.587 | 0.071 | 22.226 | 1.9E-109 | 4.251E-107 | Syk       |
| ENSMUSG00000074934 | 1854.930  | 1.587 | 0.273 | 5.818  | 6.0E-09  | 4.883E-08  | Grem1     |
| ENSMUSG00000024513 | 926.224   | 1.585 | 0.191 | 8.281  | 1.2E-16  | 1.8019E-15 | Mbd2      |
| ENSMUSG00000039936 | 7192.654  | 1.583 | 0.108 | 14.597 | 2.9E-48  | 1.5293E-46 | Pik3cd    |
| ENSMUSG00000092482 | 52.642    | 1.582 | 0.372 | 4.246  | 2.2E-05  | 0.0001144  | Gm20531   |
| ENSMUSG00000038146 | 125.078   | 1.579 | 0.427 | 3.699  | 2.2E-04  | 0.00096956 | Notch3    |
| ENSMUSG00000025314 | 4202.007  | 1.578 | 0.102 | 15.466 | 5.9E-54  | 3.625E-52  | Ptprj     |
| ENSMUSG00000022094 | 1409.936  | 1.577 | 0.142 | 11.142 | 7.8E-29  | 2.1054E-27 | Slc39a14  |
| ENSMUSG00000009035 | 13541.335 | 1.577 | 0.128 | 12.290 | 1.0E-34  | 3.472E-33  | Tmem184b  |
| ENSMUSG00000087700 | 68.629    | 1.575 | 0.433 | 3.635  | 2.8E-04  | 0.00122745 | Gm15283   |
| ENSMUSG00000068105 | 125.658   | 1.573 | 0.490 | 3.211  | 1.3E-03  | 0.00512961 | Tnfrsf13c |
| ENSMUSG00000020464 | 3709.665  | 1.572 | 0.121 | 12.987 | 1.4E-38  | 5.6237E-37 | Pnpt1     |
| ENSMUSG00000020694 | 2594.231  | 1.571 | 0.156 | 10.091 | 6.1E-24  | 1.3328E-22 | Tlk2      |
| ENSMUSG00000057054 | 59.150    | 1.571 | 0.535 | 2.936  | 3.3E-03  | 0.01184182 | Inca1     |
| ENSMUSG00000054823 | 11249.918 | 1.570 | 0.101 | 15.562 | 1.3E-54  | 8.2826E-53 | Nsd3      |
| ENSMUSG00000032034 | 287.361   | 1.570 | 0.349 | 4.493  | 7.0E-06  | 3.9753E-05 | Kcnj5     |
| ENSMUSG00000115869 | 110.625   | 1.568 | 0.319 | 4.922  | 8.6E-07  | 5.4355E-06 | Gm31814   |
| ENSMUSG00000044827 | 4429.626  | 1.568 | 0.099 | 15.796 | 3.3E-56  | 2.1807E-54 | Tlr1      |
| ENSMUSG00000043505 | 82.523    | 1.567 | 0.416 | 3.767  | 1.7E-04  | 0.00075919 | Gimap5    |
| ENSMUSG00000071713 | 15426.993 | 1.567 | 0.126 | 12.425 | 1.9E-35  | 6.6236E-34 | Csf2rb    |
| ENSMUSG00000020611 | 16888.262 | 1.566 | 0.115 | 13.632 | 2.6E-42  | 1.1441E-40 | Gnal3     |
| ENSMUSG00000081665 | 225.288   | 1.566 | 0.304 | 5.146  | 2.7E-07  | 1.8051E-06 | Gm15922   |
| ENSMUSG00000020592 | 11190.545 | 1.564 | 0.109 | 14.398 | 5.4E-47  | 2.7112E-45 | Sdc1      |
| ENSMUSG00000041135 | 4977.332  | 1.564 | 0.107 | 14.615 | 2.2E-48  | 1.1788E-46 | Ripk2     |
| ENSMUSG00000025017 | 43329.387 | 1.562 | 0.142 | 11.016 | 3.2E-28  | 8.3706E-27 | Pik3ap1   |
| ENSMUSG00000006014 | 49.047    | 1.561 | 0.600 | 2.602  | 9.3E-03  | 0.02927549 | Prg4      |
| ENSMUSG00000034997 | 60.968    | 1.561 | 0.514 | 3.038  | 2.4E-03  | 0.00874763 | Htr2a     |
| ENSMUSG00000020572 | 22667.651 | 1.560 | 0.126 | 12.420 | 2.0E-35  | 6.9886E-34 | Nampt     |
| ENSMUSG00000026833 | 388.890   | 1.560 | 0.301 | 5.188  | 2.1E-07  | 1.4544E-06 | Olfm1     |
| ENSMUSG00000056749 | 6466.365  | 1.559 | 0.119 | 13.083 | 4.1E-39  | 1.6418E-37 | Nfil3     |
| ENSMUSG00000018167 | 12372.979 | 1.558 | 0.142 | 11.007 | 3.5E-28  | 9.2072E-27 | Stard3    |
| ENSMUSG00000018340 | 12127.988 | 1.557 | 0.124 | 12.595 | 2.2E-36  | 8.0779E-35 | Anxa6     |
| ENSMUSG00000047842 | 123.427   | 1.555 | 0.397 | 3.921  | 8.8E-05  | 0.00042214 | Diras2    |
| ENSMUSG00000028337 | 5786.734  | 1.554 | 0.192 | 8.094  | 5.8E-16  | 8.1237E-15 | Coro2a    |

|                    |           |       |       |        |         |            |               |
|--------------------|-----------|-------|-------|--------|---------|------------|---------------|
| ENSMUSG00000043243 | 138.796   | 1.554 | 0.478 | 3.251  | 1.2E-03 | 0.00452206 | Niban3        |
| ENSMUSG00000104126 | 894.421   | 1.554 | 0.128 | 12.121 | 8.2E-34 | 2.6879E-32 | Gm37486       |
| ENSMUSG00000039062 | 4766.298  | 1.553 | 0.114 | 13.597 | 4.2E-42 | 1.839E-40  | Anpep         |
| ENSMUSG00000020275 | 5442.050  | 1.553 | 0.102 | 15.211 | 3.0E-52 | 1.7574E-50 | Rel           |
| ENSMUSG00000060477 | 7632.386  | 1.553 | 0.105 | 14.826 | 1.0E-49 | 5.4969E-48 | Irak2         |
| ENSMUSG00000104082 | 35.528    | 1.553 | 0.579 | 2.682  | 7.3E-03 | 0.02380412 | Gm7115        |
| ENSMUSG00000028128 | 332.906   | 1.551 | 0.302 | 5.141  | 2.7E-07 | 1.8454E-06 | F3            |
| ENSMUSG00000100018 | 40.420    | 1.549 | 0.381 | 4.062  | 4.9E-05 | 0.00024329 | Gm7776        |
| ENSMUSG00000034165 | 10841.984 | 1.549 | 0.098 | 15.836 | 1.8E-56 | 1.1791E-54 | Ccnd3         |
| ENSMUSG00000083892 | 205.924   | 1.548 | 0.213 | 7.257  | 4.0E-13 | 4.6087E-12 | Gm1848        |
| ENSMUSG00000056501 | 34149.900 | 1.546 | 0.632 | 2.448  | 1.4E-02 | 0.04298429 | Cebpb         |
| ENSMUSG00000039385 | 28.508    | 1.546 | 0.575 | 2.690  | 7.2E-03 | 0.02335085 | Cdh6          |
| ENSMUSG00000109255 | 21.514    | 1.546 | 0.507 | 3.050  | 2.3E-03 | 0.00845872 | Gm7407        |
| ENSMUSG00000086481 | 33.917    | 1.546 | 0.552 | 2.802  | 5.1E-03 | 0.01734567 | Gm11707       |
| ENSMUSG00000082190 | 48.580    | 1.545 | 0.480 | 3.218  | 1.3E-03 | 0.00501889 | Gm13641       |
| ENSMUSG00000018341 | 94.910    | 1.545 | 0.366 | 4.222  | 2.4E-05 | 0.00012615 | Il12rb2       |
| ENSMUSG00000036402 | 11681.176 | 1.544 | 0.098 | 15.700 | 1.5E-55 | 9.9384E-54 | Gng12         |
| ENSMUSG00000001666 | 525.659   | 1.541 | 0.145 | 10.609 | 2.7E-26 | 6.5301E-25 | Ddt           |
| ENSMUSG00000027351 | 3798.548  | 1.541 | 0.411 | 3.753  | 1.7E-04 | 0.00079758 | Spred1        |
| ENSMUSG00000076621 | 22.069    | 1.541 | 0.485 | 3.176  | 1.5E-03 | 0.00573893 | Ighj1         |
| ENSMUSG00000038421 | 73.418    | 1.539 | 0.475 | 3.239  | 1.2E-03 | 0.00469021 | Fcrla         |
| ENSMUSG00000106373 | 32.311    | 1.538 | 0.526 | 2.924  | 3.5E-03 | 0.01225742 | Gm6522        |
| ENSMUSG00000029860 | 46443.045 | 1.538 | 0.121 | 12.661 | 9.8E-37 | 3.5777E-35 | Zyx           |
| ENSMUSG00000000861 | 348.403   | 1.537 | 0.275 | 5.590  | 2.3E-08 | 1.7467E-07 | Bcl11a        |
| ENSMUSG00000083186 | 150.772   | 1.535 | 0.473 | 3.246  | 1.2E-03 | 0.00459028 | Gm11805       |
| ENSMUSG00000076604 | 23.688    | 1.533 | 0.557 | 2.751  | 5.9E-03 | 0.01984409 | Igkj1         |
| ENSMUSG00000081121 | 70.485    | 1.533 | 0.294 | 5.214  | 1.9E-07 | 1.2785E-06 | Gm12791       |
| ENSMUSG00000029313 | 2982.206  | 1.532 | 0.148 | 10.331 | 5.1E-25 | 1.1661E-23 | Aff1          |
| ENSMUSG00000069792 | 58615.652 | 1.531 | 0.133 | 11.545 | 7.8E-31 | 2.2819E-29 | Wfdc17        |
| ENSMUSG00000075286 | 48.865    | 1.529 | 0.519 | 2.947  | 3.2E-03 | 0.01147239 | Gm1968        |
| ENSMUSG00000024238 | 541.033   | 1.528 | 0.254 | 6.019  | 1.8E-09 | 1.511E-08  | Zeb1          |
| ENSMUSG00000017561 | 11476.554 | 1.527 | 0.118 | 12.967 | 1.9E-38 | 7.3263E-37 | Crlf3         |
| ENSMUSG00000034300 | 5799.799  | 1.527 | 0.150 | 10.167 | 2.8E-24 | 6.2353E-23 | Fam53c        |
| ENSMUSG00000028496 | 444.944   | 1.526 | 0.277 | 5.509  | 3.6E-08 | 2.7226E-07 | Mllt3         |
| ENSMUSG00000021569 | 809.102   | 1.523 | 0.165 | 9.235  | 2.6E-20 | 4.7588E-19 | Trip13        |
| ENSMUSG00000037965 | 6350.042  | 1.523 | 0.105 | 14.516 | 9.6E-48 | 4.9679E-46 | Zc3h7a        |
| ENSMUSG00000026029 | 10426.368 | 1.522 | 0.122 | 12.479 | 9.7E-36 | 3.4174E-34 | Casp8         |
| ENSMUSG00000038594 | 283.882   | 1.520 | 0.273 | 5.578  | 2.4E-08 | 1.863E-07  | Cep851        |
| ENSMUSG00000027540 | 26430.467 | 1.520 | 0.084 | 18.041 | 9.4E-73 | 9.4614E-71 | Ptpn1         |
| ENSMUSG00000107750 | 68.119    | 1.519 | 0.517 | 2.942  | 3.3E-03 | 0.01165873 | Gm44013       |
| ENSMUSG00000078453 | 4723.545  | 1.519 | 0.081 | 18.848 | 3.0E-79 | 3.4861E-77 | Abracl        |
| ENSMUSG00000049657 | 1316.334  | 1.519 | 0.182 | 8.329  | 8.1E-17 | 1.219E-15  | Zbtb5         |
| ENSMUSG00000090069 | 46.921    | 1.519 | 0.408 | 3.723  | 2.0E-04 | 0.00089137 | E430024P14Rik |
| ENSMUSG00000029086 | 277.481   | 1.517 | 0.318 | 4.767  | 1.9E-06 | 1.1414E-05 | Prom1         |
| ENSMUSG00000068749 | 9342.783  | 1.517 | 0.083 | 18.274 | 1.3E-74 | 1.3996E-72 | Psma5         |
| ENSMUSG00000026669 | 546.089   | 1.517 | 0.177 | 8.571  | 1.0E-17 | 1.634E-16  | Mcm10         |
| ENSMUSG00000053007 | 3460.475  | 1.516 | 0.145 | 10.485 | 1.0E-25 | 2.3863E-24 | Creb5         |
| ENSMUSG00000040943 | 1810.842  | 1.516 | 0.127 | 11.921 | 9.2E-33 | 2.9018E-31 | Tet2          |
| ENSMUSG00000026204 | 218.601   | 1.516 | 0.400 | 3.792  | 1.5E-04 | 0.00068998 | Ptpn          |
| ENSMUSG00000058927 | 137.966   | 1.516 | 0.243 | 6.234  | 4.5E-10 | 4.12E-09   | Gm10053       |
| ENSMUSG00000074272 | 1750.126  | 1.515 | 0.198 | 7.660  | 1.9E-14 | 2.3589E-13 | Ceacam1       |
| ENSMUSG00000033545 | 10319.802 | 1.515 | 0.105 | 14.428 | 3.5E-47 | 1.7676E-45 | Znrf1         |



|                    |            |       |       |        |         |            |               |
|--------------------|------------|-------|-------|--------|---------|------------|---------------|
| ENSMUSG00000025245 | 923.848    | 1.510 | 0.131 | 11.518 | 1.1E-30 | 3.1049E-29 | Lztf11        |
| ENSMUSG00000030530 | 11963.134  | 1.509 | 0.121 | 12.425 | 1.9E-35 | 6.6014E-34 | Furin         |
| ENSMUSG00000050994 | 486.698    | 1.509 | 0.258 | 5.847  | 5.0E-09 | 4.1205E-08 | Adgb          |
| ENSMUSG00000034574 | 1632.978   | 1.502 | 0.179 | 8.399  | 4.5E-17 | 6.8378E-16 | Daam1         |
| ENSMUSG00000038807 | 288.332    | 1.500 | 0.339 | 4.421  | 9.8E-06 | 5.4544E-05 | Rap1gap2      |
| ENSMUSG00000022822 | 5546.738   | 1.500 | 0.099 | 15.217 | 2.7E-52 | 1.6175E-50 | Abcc5         |
| ENSMUSG00000051439 | 118295.787 | 1.499 | 0.203 | 7.370  | 1.7E-13 | 2.0482E-12 | Cd14          |
| ENSMUSG00000027583 | 227.877    | 1.499 | 0.381 | 3.931  | 8.5E-05 | 0.00040688 | Zbtb46        |
| ENSMUSG00000107586 | 75.004     | 1.499 | 0.570 | 2.630  | 8.5E-03 | 0.02725717 | Gm44283       |
| ENSMUSG00000109036 | 1601.482   | 1.498 | 0.182 | 8.218  | 2.1E-16 | 3.003E-15  | 2210406H18Rik |
| ENSMUSG00000092517 | 63.877     | 1.498 | 0.495 | 3.027  | 2.5E-03 | 0.00905829 | Art2a         |
| ENSMUSG00000001768 | 18104.276  | 1.497 | 0.188 | 7.948  | 1.9E-15 | 2.5756E-14 | Rin2          |
| ENSMUSG00000068015 | 3692.121   | 1.496 | 0.112 | 13.307 | 2.1E-40 | 8.7497E-39 | Lrch1         |
| ENSMUSG00000027863 | 68.005     | 1.494 | 0.577 | 2.590  | 9.6E-03 | 0.03009762 | Cd2           |
| ENSMUSG00000099104 | 38.261     | 1.494 | 0.417 | 3.579  | 3.4E-04 | 0.00149228 | Gm17087       |
| ENSMUSG00000042228 | 28443.853  | 1.493 | 0.104 | 14.384 | 6.5E-47 | 3.2842E-45 | Lyn           |
| ENSMUSG00000021281 | 24679.710  | 1.493 | 0.101 | 14.783 | 1.9E-49 | 1.0382E-47 | Tnfaip2       |
| ENSMUSG00000028532 | 119.608    | 1.493 | 0.370 | 4.038  | 5.4E-05 | 0.00026772 | Cachd1        |
| ENSMUSG00000062190 | 546.274    | 1.490 | 0.211 | 7.075  | 1.5E-12 | 1.6578E-11 | Lancl2        |
| ENSMUSG00000029502 | 1995.680   | 1.490 | 0.186 | 8.007  | 1.2E-15 | 1.6222E-14 | Golga3        |
| ENSMUSG00000107846 | 67.975     | 1.489 | 0.399 | 3.731  | 1.9E-04 | 0.00086426 | Gm43963       |
| ENSMUSG00000093798 | 561.326    | 1.487 | 0.113 | 13.169 | 1.3E-39 | 5.3416E-38 | Gm8355        |
| ENSMUSG00000105008 | 33.974     | 1.487 | 0.455 | 3.271  | 1.1E-03 | 0.00422398 | Gm43652       |
| ENSMUSG00000020303 | 160.004    | 1.486 | 0.335 | 4.434  | 9.2E-06 | 5.137E-05  | Stc2          |
| ENSMUSG00000030672 | 54.877     | 1.479 | 0.496 | 2.980  | 2.9E-03 | 0.01040753 | Mylpf         |
| ENSMUSG00000027636 | 222.861    | 1.478 | 0.365 | 4.053  | 5.0E-05 | 0.00025213 | Sla2          |
| ENSMUSG00000031662 | 8801.198   | 1.477 | 0.093 | 15.869 | 1.0E-56 | 7.0623E-55 | Snx20         |
| ENSMUSG00000030102 | 1133.754   | 1.477 | 0.162 | 9.112  | 8.1E-20 | 1.4422E-18 | Itpr1         |
| ENSMUSG00000048218 | 78.661     | 1.476 | 0.497 | 2.972  | 3.0E-03 | 0.01068324 | Amigo2        |
| ENSMUSG00000025969 | 11707.492  | 1.475 | 0.105 | 14.001 | 1.5E-44 | 7.237E-43  | Nrp2          |
| ENSMUSG00000024897 | 1052.762   | 1.474 | 0.173 | 8.529  | 1.5E-17 | 2.3067E-16 | Apba1         |
| ENSMUSG00000104040 | 27.814     | 1.473 | 0.530 | 2.780  | 5.4E-03 | 0.01841239 | Gm37563       |
| ENSMUSG00000022144 | 114.255    | 1.472 | 0.549 | 2.681  | 7.4E-03 | 0.02391423 | Gdnf          |
| ENSMUSG00000062939 | 267.325    | 1.471 | 0.206 | 7.136  | 9.6E-13 | 1.0787E-11 | Stat4         |
| ENSMUSG00000003352 | 774.769    | 1.471 | 0.207 | 7.108  | 1.2E-12 | 1.3167E-11 | Caenb3        |
| ENSMUSG00000022564 | 27620.174  | 1.470 | 0.100 | 14.733 | 4.0E-49 | 2.1384E-47 | Grina         |
| ENSMUSG00000024073 | 6284.513   | 1.468 | 0.088 | 16.744 | 6.2E-63 | 5.0252E-61 | Birc6         |
| ENSMUSG00000018654 | 7125.079   | 1.468 | 0.117 | 12.533 | 4.9E-36 | 1.7553E-34 | Ikzfl1        |
| ENSMUSG00000028874 | 4918.510   | 1.468 | 0.125 | 11.713 | 1.1E-31 | 3.2901E-30 | Fgr           |
| ENSMUSG00000087235 | 429.636    | 1.465 | 0.196 | 7.481  | 7.4E-14 | 9.0621E-13 | Gm4750        |
| ENSMUSG00000006342 | 119.404    | 1.465 | 0.520 | 2.819  | 4.8E-03 | 0.01651524 | Susd2         |
| ENSMUSG00000037012 | 14155.930  | 1.463 | 0.089 | 16.365 | 3.4E-60 | 2.5417E-58 | Hk1           |
| ENSMUSG00000117401 | 68.799     | 1.462 | 0.381 | 3.837  | 1.2E-04 | 0.0005825  | 4833419F23Rik |
| ENSMUSG00000026933 | 846.946    | 1.461 | 0.253 | 5.767  | 8.1E-09 | 6.4923E-08 | Camsap1       |
| ENSMUSG00000042190 | 1584.415   | 1.461 | 0.115 | 12.732 | 3.9E-37 | 1.449E-35  | Cmklr1        |
| ENSMUSG00000060044 | 1245.575   | 1.459 | 0.188 | 7.772  | 7.7E-15 | 1.0062E-13 | Tmem26        |
| ENSMUSG00000083902 | 113.544    | 1.458 | 0.284 | 5.130  | 2.9E-07 | 1.956E-06  | Tent2-ps1     |
| ENSMUSG00000092626 | 113.752    | 1.457 | 0.350 | 4.163  | 3.1E-05 | 0.00016088 | 9130230N09Rik |
| ENSMUSG00000032324 | 15031.674  | 1.456 | 0.125 | 11.655 | 2.2E-31 | 6.4165E-30 | Tspan3        |
| ENSMUSG00000103628 | 19.730     | 1.455 | 0.589 | 2.471  | 1.3E-02 | 0.04068151 | Gm37361       |
| ENSMUSG00000037697 | 2065.765   | 1.455 | 0.151 | 9.633  | 5.8E-22 | 1.1556E-20 | Ddhd1         |
| ENSMUSG00000050921 | 117.735    | 1.451 | 0.531 | 2.731  | 6.3E-03 | 0.02095136 | P2ry10        |

|                    |           |       |       |        |          |            |               |
|--------------------|-----------|-------|-------|--------|----------|------------|---------------|
| ENSMUSG00000081350 | 57.235    | 1.451 | 0.288 | 5.037  | 4.7E-07  | 3.097E-06  | Gm5388        |
| ENSMUSG00000041954 | 82.282    | 1.450 | 0.408 | 3.551  | 3.8E-04  | 0.00164522 | Tnfrsf18      |
| ENSMUSG00000036138 | 8544.216  | 1.450 | 0.089 | 16.336 | 5.5E-60  | 4.0317E-58 | Acaal1a       |
| ENSMUSG00000032915 | 763.386   | 1.449 | 0.272 | 5.332  | 9.7E-08  | 6.9607E-07 | Adgre4        |
| ENSMUSG00000024887 | 192.142   | 1.449 | 0.337 | 4.297  | 1.7E-05  | 9.2674E-05 | Asah2         |
| ENSMUSG00000050930 | 242.615   | 1.449 | 0.526 | 2.756  | 5.9E-03  | 0.01958951 | Map10         |
| ENSMUSG00000105646 | 40.659    | 1.449 | 0.539 | 2.686  | 7.2E-03  | 0.02355914 | Gm30211       |
| ENSMUSG00000053931 | 3129.083  | 1.448 | 0.148 | 9.772  | 1.5E-22  | 3.0474E-21 | Cnn3          |
| ENSMUSG00000041488 | 2749.142  | 1.448 | 0.155 | 9.326  | 1.1E-20  | 2.0577E-19 | Stx3          |
| ENSMUSG00000021895 | 3658.169  | 1.448 | 0.165 | 8.787  | 1.5E-18  | 2.5726E-17 | Arhgef3       |
| ENSMUSG00000038156 | 266.294   | 1.447 | 0.348 | 4.161  | 3.2E-05  | 0.00016246 | Spon1         |
| ENSMUSG00000001948 | 29.573    | 1.446 | 0.488 | 2.963  | 3.0E-03  | 0.01093734 | Spa17         |
| ENSMUSG00000075502 | 193.332   | 1.446 | 0.320 | 4.517  | 6.3E-06  | 3.5757E-05 | Kbtbd6        |
| ENSMUSG00000019818 | 23265.770 | 1.446 | 0.128 | 11.306 | 1.2E-29  | 3.4313E-28 | Cd164         |
| ENSMUSG00000018143 | 3663.141  | 1.445 | 0.114 | 12.690 | 6.7E-37  | 2.4722E-35 | Mafk          |
| ENSMUSG00000028367 | 38769.501 | 1.441 | 0.103 | 14.000 | 1.6E-44  | 7.3683E-43 | Txn1          |
| ENSMUSG00000102856 | 196.890   | 1.439 | 0.323 | 4.462  | 8.1E-06  | 4.562E-05  | Gm37084       |
| ENSMUSG00000042719 | 4531.362  | 1.439 | 0.112 | 12.812 | 1.4E-37  | 5.3432E-36 | Naa25         |
| ENSMUSG00000019842 | 519.581   | 1.438 | 0.249 | 5.768  | 8.0E-09  | 6.4543E-08 | Traf3ip2      |
| ENSMUSG00000064246 | 16155.572 | 1.437 | 0.203 | 7.077  | 1.5E-12  | 1.6404E-11 | Chil1         |
| ENSMUSG00000053965 | 487.217   | 1.437 | 0.263 | 5.473  | 4.4E-08  | 3.3011E-07 | Pde5a         |
| ENSMUSG00000104291 | 1716.088  | 1.435 | 0.173 | 8.292  | 1.1E-16  | 1.6504E-15 | A130071D04Rik |
| ENSMUSG00000090230 | 64.155    | 1.435 | 0.491 | 2.919  | 3.5E-03  | 0.01242115 | Gm16315       |
| ENSMUSG00000037816 | 3676.406  | 1.435 | 0.172 | 8.318  | 8.9E-17  | 1.3355E-15 | Fbxw17        |
| ENSMUSG00000090877 | 105.643   | 1.435 | 0.335 | 4.276  | 1.9E-05  | 0.00010088 | Hspa1b        |
| ENSMUSG00000083396 | 92.018    | 1.434 | 0.283 | 5.063  | 4.1E-07  | 2.7151E-06 | Gm15542       |
| ENSMUSG00000002103 | 13689.726 | 1.434 | 0.094 | 15.282 | 1.0E-52  | 6.0748E-51 | Acp2          |
| ENSMUSG00000024785 | 2956.619  | 1.433 | 0.109 | 13.148 | 1.8E-39  | 7.0691E-38 | Rcl1          |
| ENSMUSG00000045514 | 24.592    | 1.432 | 0.518 | 2.762  | 5.7E-03  | 0.01927081 | Olfra460      |
| ENSMUSG00000035673 | 15359.248 | 1.430 | 0.114 | 12.533 | 4.9E-36  | 1.7553E-34 | Sbno2         |
| ENSMUSG00000044285 | 1808.096  | 1.430 | 0.218 | 6.572  | 5.0E-11  | 4.8779E-10 | Ubb-ps        |
| ENSMUSG00000039328 | 189.087   | 1.429 | 0.279 | 5.116  | 3.1E-07  | 2.0931E-06 | Rnfl22        |
| ENSMUSG00000026576 | 162.555   | 1.429 | 0.295 | 4.843  | 1.3E-06  | 7.9567E-06 | Atp1b1        |
| ENSMUSG00000036053 | 2148.744  | 1.428 | 0.195 | 7.308  | 2.7E-13  | 3.2127E-12 | Fmnl2         |
| ENSMUSG00000025525 | 1810.330  | 1.428 | 0.136 | 10.517 | 7.2E-26  | 1.698E-24  | Apool         |
| ENSMUSG00000031825 | 554.491   | 1.428 | 0.256 | 5.581  | 2.4E-08  | 1.8295E-07 | Crispld2      |
| ENSMUSG00000039621 | 12236.351 | 1.428 | 0.114 | 12.577 | 2.8E-36  | 1.016E-34  | Prex1         |
| ENSMUSG00000086213 | 129.062   | 1.427 | 0.272 | 5.244  | 1.6E-07  | 1.0965E-06 | A330040F15Rik |
| ENSMUSG00000038518 | 5031.114  | 1.427 | 0.150 | 9.526  | 1.6E-21  | 3.2191E-20 | Jarid2        |
| ENSMUSG00000022018 | 2561.485  | 1.427 | 0.130 | 10.992 | 4.2E-28  | 1.0867E-26 | Rgcc          |
| ENSMUSG00000020225 | 8340.275  | 1.427 | 0.083 | 17.184 | 3.5E-66  | 3.1202E-64 | Tmbim4        |
| ENSMUSG00000022372 | 3536.618  | 1.426 | 0.145 | 9.836  | 7.9E-23  | 1.643E-21  | Sla           |
| ENSMUSG00000045210 | 3796.874  | 1.424 | 0.157 | 9.091  | 9.9E-20  | 1.7541E-18 | Vcpip1        |
| ENSMUSG00000035505 | 1366.752  | 1.421 | 0.174 | 8.180  | 2.8E-16  | 4.1034E-15 | Cox18         |
| ENSMUSG00000005824 | 341.601   | 1.421 | 0.280 | 5.072  | 3.9E-07  | 2.5962E-06 | Tnfrsf14      |
| ENSMUSG00000027012 | 12256.091 | 1.420 | 0.128 | 11.114 | 1.1E-28  | 2.8679E-27 | Dync1i2       |
| ENSMUSG00000042367 | 78.940    | 1.420 | 0.513 | 2.766  | 5.7E-03  | 0.01906642 | Gjb3          |
| ENSMUSG00000078783 | 255.527   | 1.420 | 0.262 | 5.425  | 5.8E-08  | 4.2672E-07 | Gm9733        |
| ENSMUSG00000028005 | 640.934   | 1.419 | 0.311 | 4.561  | 5.1E-06  | 2.9376E-05 | Gucy1b1       |
| ENSMUSG00000021024 | 12476.729 | 1.419 | 0.065 | 21.855 | 7.0E-106 | 1.446E-103 | Psma6         |
| ENSMUSG00000034575 | 2090.306  | 1.418 | 0.225 | 6.315  | 2.7E-10  | 2.5088E-09 | Tent4a        |
| ENSMUSG00000051022 | 89.897    | 1.416 | 0.466 | 3.042  | 2.4E-03  | 0.00866533 | Hs3st1        |

|                    |            |       |       |        |          |            |               |
|--------------------|------------|-------|-------|--------|----------|------------|---------------|
| ENSMUSG00000063694 | 4062.778   | 1.416 | 0.110 | 12.830 | 1.1E-37  | 4.2481E-36 | Cycs          |
| ENSMUSG00000061186 | 85.717     | 1.416 | 0.523 | 2.706  | 6.8E-03  | 0.02240781 | Sfmbt2        |
| ENSMUSG00000020709 | 19856.462  | 1.416 | 0.147 | 9.652  | 4.8E-22  | 9.6893E-21 | Adap2         |
| ENSMUSG00000087593 | 46.432     | 1.415 | 0.402 | 3.522  | 4.3E-04  | 0.00182053 | Gm16174       |
| ENSMUSG00000082054 | 27.684     | 1.414 | 0.490 | 2.887  | 3.9E-03  | 0.01361373 | Psmb6-ps      |
| ENSMUSG00000028517 | 6269.528   | 1.414 | 0.115 | 12.250 | 1.7E-34  | 5.6685E-33 | Plpp3         |
| ENSMUSG00000021675 | 2598.545   | 1.413 | 0.301 | 4.692  | 2.7E-06  | 1.6191E-05 | F2rl2         |
| ENSMUSG00000106115 | 100.116    | 1.413 | 0.413 | 3.424  | 6.2E-04  | 0.00254115 | Gm43420       |
| ENSMUSG00000041143 | 756.699    | 1.413 | 0.249 | 5.663  | 1.5E-08  | 1.1659E-07 | Tmco4         |
| ENSMUSG00000022148 | 15684.265  | 1.412 | 0.075 | 18.946 | 4.7E-80  | 5.5356E-78 | Fyb           |
| ENSMUSG00000089803 | 30.188     | 1.412 | 0.504 | 2.800  | 5.1E-03  | 0.01743604 | Gm10171       |
| ENSMUSG00000001542 | 18322.010  | 1.411 | 0.112 | 12.651 | 1.1E-36  | 4.0359E-35 | El12          |
| ENSMUSG00000020841 | 4922.490   | 1.411 | 0.132 | 10.687 | 1.2E-26  | 2.8476E-25 | Cpd           |
| ENSMUSG00000112843 | 1041.560   | 1.411 | 0.122 | 11.545 | 7.9E-31  | 2.2951E-29 | Gm46224       |
| ENSMUSG00000029474 | 3749.466   | 1.411 | 0.171 | 8.233  | 1.8E-16  | 2.6591E-15 | Rnf34         |
| ENSMUSG00000118164 | 63.481     | 1.410 | 0.414 | 3.408  | 6.6E-04  | 0.00268421 | Gm20570       |
| ENSMUSG00000074813 | 1879.615   | 1.410 | 0.120 | 11.770 | 5.6E-32  | 1.6974E-30 | Morrbid       |
| ENSMUSG00000030922 | 800.759    | 1.409 | 0.153 | 9.211  | 3.2E-20  | 5.8691E-19 | Lyrml         |
| ENSMUSG00000058624 | 1900.736   | 1.408 | 0.114 | 12.332 | 6.1E-35  | 2.0833E-33 | Gda           |
| ENSMUSG00000024190 | 20638.918  | 1.407 | 0.139 | 10.159 | 3.0E-24  | 6.7453E-23 | Dusp1         |
| ENSMUSG00000024867 | 169.515    | 1.407 | 0.335 | 4.203  | 2.6E-05  | 0.00013655 | Pip5k1b       |
| ENSMUSG00000022684 | 5040.568   | 1.406 | 0.112 | 12.605 | 2.0E-36  | 7.1485E-35 | Bfar          |
| ENSMUSG00000083773 | 17.591     | 1.404 | 0.578 | 2.428  | 1.5E-02  | 0.04513353 | Gm13394       |
| ENSMUSG00000024018 | 66.852     | 1.404 | 0.495 | 2.834  | 4.6E-03  | 0.01583267 | Ccdc167       |
| ENSMUSG00000115518 | 41.276     | 1.401 | 0.479 | 2.927  | 3.4E-03  | 0.0121706  | Gm10791       |
| ENSMUSG00000096967 | 50.836     | 1.397 | 0.574 | 2.435  | 1.5E-02  | 0.04434565 | Gm26621       |
| ENSMUSG00000029826 | 16439.183  | 1.395 | 0.128 | 10.867 | 1.6E-27  | 4.1788E-26 | Zc3hav1       |
| ENSMUSG00000044786 | 41857.809  | 1.394 | 0.125 | 11.167 | 5.9E-29  | 1.6029E-27 | Zfp36         |
| ENSMUSG00000032333 | 2626.454   | 1.394 | 0.174 | 8.001  | 1.2E-15  | 1.6958E-14 | Stoml1        |
| ENSMUSG00000022747 | 366.348    | 1.393 | 0.272 | 5.117  | 3.1E-07  | 2.0848E-06 | St3gal6       |
| ENSMUSG00000064936 | 66.662     | 1.392 | 0.329 | 4.228  | 2.4E-05  | 0.00012349 | Gm23722       |
| ENSMUSG00000032965 | 1104.355   | 1.391 | 0.138 | 10.103 | 5.4E-24  | 1.1833E-22 | Ift57         |
| ENSMUSG00000026390 | 10532.266  | 1.389 | 0.311 | 4.460  | 8.2E-06  | 4.6038E-05 | Marco         |
| ENSMUSG00000033318 | 610.557    | 1.389 | 0.163 | 8.494  | 2.0E-17  | 3.1068E-16 | Gstt2         |
| ENSMUSG00000021929 | 7502.198   | 1.387 | 0.114 | 12.178 | 4.1E-34  | 1.3565E-32 | Kpna3         |
| ENSMUSG00000061232 | 235584.334 | 1.386 | 0.135 | 10.266 | 1.0E-24  | 2.2724E-23 | H2-K1         |
| ENSMUSG00000094242 | 16.590     | 1.385 | 0.568 | 2.438  | 1.5E-02  | 0.04411324 | Gm5456        |
| ENSMUSG00000078945 | 1828.227   | 1.385 | 0.176 | 7.852  | 4.1E-15  | 5.426E-14  | Naip2         |
| ENSMUSG00000085471 | 81.412     | 1.382 | 0.392 | 3.529  | 4.2E-04  | 0.00177483 | 4933423P22Rik |
| ENSMUSG00000078486 | 154.322    | 1.381 | 0.336 | 4.110  | 4.0E-05  | 0.00019989 | Perm1         |
| ENSMUSG00000027959 | 646.252    | 1.381 | 0.128 | 10.758 | 5.5E-27  | 1.3573E-25 | Sass6         |
| ENSMUSG00000036636 | 16488.106  | 1.378 | 0.089 | 15.519 | 2.6E-54  | 1.607E-52  | Clcn7         |
| ENSMUSG00000041754 | 1407.758   | 1.374 | 0.181 | 7.602  | 2.9E-14  | 3.6657E-13 | Trem3         |
| ENSMUSG00000082896 | 248.961    | 1.374 | 0.262 | 5.242  | 1.6E-07  | 1.1099E-06 | Gm5844        |
| ENSMUSG00000061751 | 860.144    | 1.374 | 0.217 | 6.339  | 2.3E-10  | 2.1629E-09 | Kalrn         |
| ENSMUSG00000031729 | 12237.734  | 1.374 | 0.116 | 11.816 | 3.2E-32  | 9.9457E-31 | Ist1          |
| ENSMUSG00000021948 | 28280.461  | 1.374 | 0.052 | 26.208 | 2.2E-151 | 1.064E-148 | Prkcd         |
| ENSMUSG00000029330 | 1216.396   | 1.373 | 0.207 | 6.620  | 3.6E-11  | 3.5626E-10 | Cds1          |
| ENSMUSG00000032323 | 225.656    | 1.371 | 0.560 | 2.447  | 1.4E-02  | 0.04313446 | Cyp11a1       |
| ENSMUSG00000071454 | 725.743    | 1.370 | 0.167 | 8.191  | 2.6E-16  | 3.735E-15  | Dtnb          |
| ENSMUSG00000038910 | 3412.177   | 1.370 | 0.139 | 9.826  | 8.7E-23  | 1.8184E-21 | Plcl2         |
| ENSMUSG00000004043 | 4422.666   | 1.368 | 0.140 | 9.750  | 1.8E-22  | 3.7737E-21 | Stat5a        |

|                    |           |       |       |        |         |            |               |
|--------------------|-----------|-------|-------|--------|---------|------------|---------------|
| ENSMUSG00000110148 | 113.961   | 1.367 | 0.373 | 3.664  | 2.5E-04 | 0.00110432 | 5830408C22Rik |
| ENSMUSG00000073490 | 14499.039 | 1.366 | 0.210 | 6.513  | 7.3E-11 | 7.1113E-10 | Ifi207        |
| ENSMUSG00000085401 | 28.452    | 1.366 | 0.469 | 2.914  | 3.6E-03 | 0.0126101  | Slc39a1-ps    |
| ENSMUSG00000084289 | 2592.122  | 1.366 | 0.313 | 4.359  | 1.3E-05 | 7.1174E-05 | Fth1-ps       |
| ENSMUSG00000004266 | 21663.772 | 1.363 | 0.067 | 20.271 | 2.3E-91 | 3.6284E-89 | Ptpn6         |
| ENSMUSG00000021366 | 1163.237  | 1.363 | 0.212 | 6.432  | 1.3E-10 | 1.2004E-09 | Hivep1        |
| ENSMUSG00000097113 | 117.245   | 1.361 | 0.277 | 4.922  | 8.6E-07 | 5.4308E-06 | Gm19705       |
| ENSMUSG00000041238 | 2556.668  | 1.361 | 0.130 | 10.467 | 1.2E-25 | 2.8807E-24 | Rbbp8         |
| ENSMUSG00000059866 | 3628.492  | 1.361 | 0.117 | 11.649 | 2.3E-31 | 6.9036E-30 | Tnip2         |
| ENSMUSG00000032902 | 1497.254  | 1.360 | 0.215 | 6.327  | 2.5E-10 | 2.3275E-09 | Slc16a1       |
| ENSMUSG00000032249 | 5620.800  | 1.358 | 0.103 | 13.160 | 1.5E-39 | 5.9964E-38 | Anp32a        |
| ENSMUSG00000028645 | 9115.915  | 1.357 | 0.096 | 14.106 | 3.5E-45 | 1.6714E-43 | Slc2a1        |
| ENSMUSG00000021196 | 6969.263  | 1.357 | 0.090 | 15.043 | 3.8E-51 | 2.2032E-49 | Pfkip         |
| ENSMUSG00000005611 | 800.081   | 1.357 | 0.296 | 4.583  | 4.6E-06 | 2.6617E-05 | Irag1         |
| ENSMUSG00000081880 | 23.590    | 1.357 | 0.428 | 3.172  | 1.5E-03 | 0.00580487 | Gm5385        |
| ENSMUSG00000027469 | 1720.017  | 1.356 | 0.166 | 8.160  | 3.3E-16 | 4.8014E-15 | Tpx2          |
| ENSMUSG00000083161 | 434.019   | 1.355 | 0.263 | 5.155  | 2.5E-07 | 1.7192E-06 | Gm11427       |
| ENSMUSG00000084067 | 89.364    | 1.354 | 0.272 | 4.972  | 6.6E-07 | 4.2627E-06 | Gm14269       |
| ENSMUSG00000092268 | 142.730   | 1.354 | 0.330 | 4.102  | 4.1E-05 | 0.00020689 | Gm20540       |
| ENSMUSG00000050002 | 3833.723  | 1.353 | 0.107 | 12.679 | 7.7E-37 | 2.828E-35  | Idnk          |
| ENSMUSG00000005667 | 4871.536  | 1.353 | 0.100 | 13.520 | 1.2E-41 | 5.1137E-40 | Mthfd2        |
| ENSMUSG00000025877 | 59055.131 | 1.350 | 0.126 | 10.761 | 5.3E-27 | 1.3126E-25 | Hk3           |
| ENSMUSG00000050147 | 418.859   | 1.350 | 0.311 | 4.336  | 1.5E-05 | 7.8389E-05 | F2rl3         |
| ENSMUSG00000105272 | 91.500    | 1.350 | 0.314 | 4.304  | 1.7E-05 | 8.9802E-05 | Gm43071       |
| ENSMUSG00000110469 | 15.714    | 1.349 | 0.544 | 2.482  | 1.3E-02 | 0.03963622 | Gm10358       |
| ENSMUSG00000091549 | 1289.226  | 1.348 | 0.278 | 4.845  | 1.3E-06 | 7.886E-06  | Gm6548        |
| ENSMUSG00000055632 | 205.747   | 1.347 | 0.274 | 4.908  | 9.2E-07 | 5.8255E-06 | Hmcn2         |
| ENSMUSG00000052760 | 1677.720  | 1.346 | 0.131 | 10.309 | 6.4E-25 | 1.4723E-23 | A630001G21Rik |
| ENSMUSG00000044340 | 380.396   | 1.345 | 0.318 | 4.233  | 2.3E-05 | 0.00012067 | Phlpp1        |
| ENSMUSG00000027010 | 6274.729  | 1.345 | 0.125 | 10.752 | 5.8E-27 | 1.4426E-25 | Slc25a12      |
| ENSMUSG00000082905 | 19.455    | 1.345 | 0.508 | 2.649  | 8.1E-03 | 0.02598932 | Gm7823        |
| ENSMUSG00000039682 | 7240.124  | 1.343 | 0.114 | 11.753 | 6.8E-32 | 2.0577E-30 | Lap3          |
| ENSMUSG00000053279 | 93.007    | 1.342 | 0.455 | 2.951  | 3.2E-03 | 0.01136134 | Aldh1a1       |
| ENSMUSG00000033880 | 61814.484 | 1.340 | 0.162 | 8.288  | 1.2E-16 | 1.7055E-15 | Lgals3bp      |
| ENSMUSG00000001248 | 5143.906  | 1.338 | 0.138 | 9.722  | 2.4E-22 | 4.9413E-21 | Gramd1a       |
| ENSMUSG00000031627 | 8638.586  | 1.338 | 0.108 | 12.439 | 1.6E-35 | 5.5986E-34 | Irf2          |
| ENSMUSG00000020089 | 4642.055  | 1.338 | 0.098 | 13.627 | 2.8E-42 | 1.2207E-40 | Ppa1          |
| ENSMUSG00000083367 | 44.600    | 1.338 | 0.396 | 3.374  | 7.4E-04 | 0.00300514 | Gm8806        |
| ENSMUSG00000024981 | 10825.373 | 1.336 | 0.079 | 16.978 | 1.2E-64 | 1.0149E-62 | Acs15         |
| ENSMUSG00000037239 | 144.648   | 1.336 | 0.339 | 3.945  | 8.0E-05 | 0.00038416 | Spred3        |
| ENSMUSG00000031557 | 6191.921  | 1.335 | 0.120 | 11.110 | 1.1E-28 | 3.0157E-27 | Plekha2       |
| ENSMUSG00000043336 | 3424.524  | 1.334 | 0.130 | 10.237 | 1.4E-24 | 3.0715E-23 | Filip11       |
| ENSMUSG00000047798 | 4811.639  | 1.331 | 0.167 | 7.967  | 1.6E-15 | 2.2268E-14 | Cd300lf       |
| ENSMUSG00000061013 | 154.890   | 1.331 | 0.367 | 3.628  | 2.9E-04 | 0.00125572 | Mkx           |
| ENSMUSG00000110088 | 144.181   | 1.330 | 0.303 | 4.385  | 1.2E-05 | 6.3597E-05 | Gm45343       |
| ENSMUSG00000113743 | 14.378    | 1.330 | 0.530 | 2.509  | 1.2E-02 | 0.03700435 | Gm8712        |
| ENSMUSG00000117575 | 101.018   | 1.329 | 0.363 | 3.664  | 2.5E-04 | 0.00110448 | Gm36486       |
| ENSMUSG00000037553 | 921.719   | 1.326 | 0.291 | 4.551  | 5.3E-06 | 3.0637E-05 | Zdhhc18       |
| ENSMUSG00000040699 | 19917.594 | 1.324 | 0.083 | 15.984 | 1.6E-57 | 1.1463E-55 | Limd2         |
| ENSMUSG00000056144 | 1238.551  | 1.324 | 0.250 | 5.288  | 1.2E-07 | 8.742E-07  | Trim34a       |
| ENSMUSG00000017929 | 5772.790  | 1.323 | 0.163 | 8.143  | 3.8E-16 | 5.4894E-15 | B4galt5       |
| ENSMUSG00000072889 | 3861.743  | 1.323 | 0.177 | 7.475  | 7.7E-14 | 9.4493E-13 | Nfx11         |

|                    |            |       |       |        |         |            |               |
|--------------------|------------|-------|-------|--------|---------|------------|---------------|
| ENSMUSG00000028842 | 2910.816   | 1.321 | 0.133 | 9.949  | 2.5E-23 | 5.4182E-22 | Ago3          |
| ENSMUSG00000035248 | 6024.513   | 1.320 | 0.113 | 11.637 | 2.7E-31 | 7.9046E-30 | Tut7          |
| ENSMUSG00000015970 | 84.861     | 1.318 | 0.379 | 3.473  | 5.1E-04 | 0.0021519  | Chdh          |
| ENSMUSG00000000078 | 27186.130  | 1.316 | 0.114 | 11.508 | 1.2E-30 | 3.5027E-29 | Klf6          |
| ENSMUSG00000029552 | 4476.147   | 1.316 | 0.126 | 10.422 | 2.0E-25 | 4.5528E-24 | Tes           |
| ENSMUSG00000049327 | 3956.002   | 1.316 | 0.127 | 10.401 | 2.5E-25 | 5.6869E-24 | Kmt5a         |
| ENSMUSG00000026797 | 1583.023   | 1.316 | 0.178 | 7.378  | 1.6E-13 | 1.9387E-12 | Stxbp1        |
| ENSMUSG00000102425 | 85.723     | 1.315 | 0.522 | 2.520  | 1.2E-02 | 0.03606796 | Gm26616       |
| ENSMUSG00000051306 | 1974.038   | 1.313 | 0.134 | 9.826  | 8.7E-23 | 1.8082E-21 | Usp42         |
| ENSMUSG00000020044 | 5635.801   | 1.313 | 0.146 | 8.962  | 3.2E-19 | 5.5544E-18 | Timp3         |
| ENSMUSG00000028071 | 129.432    | 1.312 | 0.436 | 3.011  | 2.6E-03 | 0.00949889 | Sh2d2a        |
| ENSMUSG00000029401 | 9654.518   | 1.310 | 0.101 | 12.944 | 2.5E-38 | 9.7696E-37 | Rilpl2        |
| ENSMUSG00000017715 | 8238.827   | 1.309 | 0.079 | 16.657 | 2.7E-62 | 2.134E-60  | Pgs1          |
| ENSMUSG00000019990 | 680.856    | 1.309 | 0.263 | 4.969  | 6.7E-07 | 4.3183E-06 | Pde7b         |
| ENSMUSG00000037075 | 2368.707   | 1.308 | 0.138 | 9.473  | 2.7E-21 | 5.2505E-20 | Rnfl39        |
| ENSMUSG00000061731 | 999.102    | 1.308 | 0.223 | 5.862  | 4.6E-09 | 3.781E-08  | Ext1          |
| ENSMUSG00000085295 | 3201.546   | 1.308 | 0.200 | 6.531  | 6.5E-11 | 6.3453E-10 | 4930430E12Rik |
| ENSMUSG00000055200 | 3777.582   | 1.307 | 0.150 | 8.696  | 3.4E-18 | 5.61E-17   | Sertad3       |
| ENSMUSG00000019564 | 1514.986   | 1.307 | 0.154 | 8.468  | 2.5E-17 | 3.848E-16  | Arid3a        |
| ENSMUSG00000021133 | 8057.535   | 1.305 | 0.115 | 11.303 | 1.3E-29 | 3.5338E-28 | Susd6         |
| ENSMUSG00000097350 | 30.436     | 1.305 | 0.539 | 2.422  | 1.5E-02 | 0.04580433 | 4732491K20Rik |
| ENSMUSG00000014349 | 8628.167   | 1.304 | 0.142 | 9.154  | 5.5E-20 | 9.937E-19  | Ube2z         |
| ENSMUSG00000021266 | 7635.667   | 1.304 | 0.097 | 13.464 | 2.6E-41 | 1.089E-39  | Wars          |
| ENSMUSG00000032009 | 227.432    | 1.303 | 0.313 | 4.167  | 3.1E-05 | 0.00015826 | Sesn3         |
| ENSMUSG00000024601 | 5717.697   | 1.303 | 0.125 | 10.435 | 1.7E-25 | 3.993E-24  | Isoc1         |
| ENSMUSG00000002108 | 7092.186   | 1.303 | 0.178 | 7.328  | 2.3E-13 | 2.7859E-12 | Nrlh3         |
| ENSMUSG00000072941 | 3046.959   | 1.302 | 0.179 | 7.286  | 3.2E-13 | 3.7632E-12 | Sod3          |
| ENSMUSG00000055676 | 24.936     | 1.302 | 0.538 | 2.421  | 1.5E-02 | 0.04594777 | Gm5069        |
| ENSMUSG00000021451 | 13134.414  | 1.300 | 0.106 | 12.291 | 1.0E-34 | 3.4306E-33 | Sema4d        |
| ENSMUSG00000031520 | 358.046    | 1.300 | 0.295 | 4.412  | 1.0E-05 | 5.6617E-05 | Vegfc         |
| ENSMUSG00000052296 | 1723.775   | 1.299 | 0.178 | 7.289  | 3.1E-13 | 3.6838E-12 | Ppp6r1        |
| ENSMUSG00000105905 | 23.987     | 1.297 | 0.421 | 3.082  | 2.1E-03 | 0.0076751  | Gm7709        |
| ENSMUSG00000014850 | 411.928    | 1.297 | 0.238 | 5.451  | 5.0E-08 | 3.7049E-07 | Msh3          |
| ENSMUSG00000043017 | 1921.523   | 1.297 | 0.201 | 6.464  | 1.0E-10 | 9.8026E-10 | Ptgir         |
| ENSMUSG00000083041 | 30.621     | 1.297 | 0.423 | 3.068  | 2.2E-03 | 0.00800495 | Gmfg-ps       |
| ENSMUSG00000016559 | 124801.569 | 1.297 | 0.108 | 12.026 | 2.6E-33 | 8.385E-32  | H3f3b         |
| ENSMUSG00000092572 | 231.435    | 1.297 | 0.231 | 5.601  | 2.1E-08 | 1.6394E-07 | Serpinb10     |
| ENSMUSG00000030830 | 8320.629   | 1.296 | 0.109 | 11.879 | 1.5E-32 | 4.7952E-31 | Itgal         |
| ENSMUSG00000048521 | 247.121    | 1.296 | 0.227 | 5.713  | 1.1E-08 | 8.8392E-08 | Cxcr6         |
| ENSMUSG00000030188 | 1391.378   | 1.295 | 0.114 | 11.397 | 4.3E-30 | 1.2203E-28 | Magohb        |
| ENSMUSG00000019857 | 1038.908   | 1.295 | 0.136 | 9.516  | 1.8E-21 | 3.5109E-20 | Asfla         |
| ENSMUSG00000014030 | 82.466     | 1.293 | 0.450 | 2.875  | 4.0E-03 | 0.01409295 | Pax5          |
| ENSMUSG00000030199 | 4656.583   | 1.292 | 0.117 | 11.058 | 2.0E-28 | 5.3165E-27 | Etv6          |
| ENSMUSG00000035382 | 2642.278   | 1.291 | 0.131 | 9.869  | 5.7E-23 | 1.197E-21  | Pcsk7         |
| ENSMUSG00000047565 | 36.103     | 1.291 | 0.402 | 3.210  | 1.3E-03 | 0.00514955 | Acot10        |
| ENSMUSG00000097000 | 262.560    | 1.291 | 0.324 | 3.979  | 6.9E-05 | 0.00033796 | Gm17435       |
| ENSMUSG00000022895 | 4911.744   | 1.290 | 0.115 | 11.229 | 2.9E-29 | 8.0739E-28 | Ets2          |
| ENSMUSG00000027519 | 6901.912   | 1.288 | 0.112 | 11.470 | 1.9E-30 | 5.3485E-29 | Rab22a        |
| ENSMUSG00000109336 | 2357.956   | 1.286 | 0.121 | 10.641 | 1.9E-26 | 4.6796E-25 | Samd4b        |
| ENSMUSG00000037336 | 781.930    | 1.286 | 0.298 | 4.309  | 1.6E-05 | 8.7835E-05 | Mfsd2b        |
| ENSMUSG00000059108 | 1014.701   | 1.286 | 0.155 | 8.290  | 1.1E-16 | 1.6834E-15 | Ifitm6        |
| ENSMUSG00000079037 | 2105.711   | 1.284 | 0.129 | 9.958  | 2.3E-23 | 5.0048E-22 | Prnp          |

|                    |            |       |       |        |         |            |               |
|--------------------|------------|-------|-------|--------|---------|------------|---------------|
| ENSMUSG00000026721 | 1381.014   | 1.284 | 0.162 | 7.948  | 1.9E-15 | 2.5778E-14 | Rabgap11      |
| ENSMUSG00000029063 | 17294.385  | 1.283 | 0.072 | 17.866 | 2.2E-71 | 2.141E-69  | Nadk          |
| ENSMUSG00000103032 | 101.893    | 1.283 | 0.432 | 2.970  | 3.0E-03 | 0.01072704 | Gm37121       |
| ENSMUSG00000022175 | 19143.827  | 1.283 | 0.089 | 14.472 | 1.8E-47 | 9.3816E-46 | Lrp10         |
| ENSMUSG00000079580 | 34.338     | 1.282 | 0.496 | 2.584  | 9.8E-03 | 0.03059312 | Tmem217       |
| ENSMUSG00000019817 | 138.258    | 1.281 | 0.506 | 2.533  | 1.1E-02 | 0.03491909 | Plagl1        |
| ENSMUSG00000097354 | 399.937    | 1.280 | 0.178 | 7.186  | 6.7E-13 | 7.6313E-12 | 2310001H17Rik |
| ENSMUSG00000081552 | 98.229     | 1.279 | 0.247 | 5.170  | 2.3E-07 | 1.5941E-06 | Gm12328       |
| ENSMUSG00000029581 | 6928.887   | 1.278 | 0.131 | 9.721  | 2.5E-22 | 5.0018E-21 | Fscn1         |
| ENSMUSG00000090224 | 298.686    | 1.277 | 0.318 | 4.011  | 6.0E-05 | 0.00029799 | Gm15974       |
| ENSMUSG00000039004 | 318.235    | 1.277 | 0.271 | 4.717  | 2.4E-06 | 1.4395E-05 | Bmp6          |
| ENSMUSG00000033885 | 6639.805   | 1.275 | 0.139 | 9.147  | 5.9E-20 | 1.0593E-18 | Pxk           |
| ENSMUSG00000033256 | 138.461    | 1.275 | 0.363 | 3.509  | 4.5E-04 | 0.00190373 | Shf           |
| ENSMUSG00000025337 | 7548.278   | 1.274 | 0.088 | 14.468 | 1.9E-47 | 9.8357E-46 | Sbds          |
| ENSMUSG00000029156 | 2135.388   | 1.274 | 0.160 | 7.957  | 1.8E-15 | 2.4064E-14 | Sgcb          |
| ENSMUSG00000022587 | 135174.358 | 1.274 | 0.186 | 6.840  | 7.9E-12 | 8.2866E-11 | Ly6e          |
| ENSMUSG00000074579 | 122.254    | 1.274 | 0.423 | 3.011  | 2.6E-03 | 0.00950451 | Lekr1         |
| ENSMUSG00000051498 | 1317.180   | 1.274 | 0.159 | 8.028  | 9.9E-16 | 1.3722E-14 | Tlr6          |
| ENSMUSG00000038612 | 40884.968  | 1.273 | 0.108 | 11.785 | 4.7E-32 | 1.4309E-30 | Mcl1          |
| ENSMUSG00000035107 | 409.388    | 1.273 | 0.196 | 6.510  | 7.5E-11 | 7.2839E-10 | Dcbld2        |
| ENSMUSG00000035392 | 5628.914   | 1.272 | 0.132 | 9.602  | 7.9E-22 | 1.5602E-20 | Dennd1a       |
| ENSMUSG00000020534 | 351.038    | 1.272 | 0.289 | 4.401  | 1.1E-05 | 5.9491E-05 | Shmt1         |
| ENSMUSG00000082321 | 116.820    | 1.270 | 0.294 | 4.323  | 1.5E-05 | 8.2866E-05 | Gm14253       |
| ENSMUSG00000022824 | 227.383    | 1.270 | 0.308 | 4.121  | 3.8E-05 | 0.00019078 | Muc13         |
| ENSMUSG00000096745 | 44.077     | 1.269 | 0.357 | 3.560  | 3.7E-04 | 0.00159555 | Gm12622       |
| ENSMUSG00000071714 | 9581.203   | 1.269 | 0.135 | 9.372  | 7.1E-21 | 1.3428E-19 | Csf2rb2       |
| ENSMUSG00000105461 | 53.853     | 1.269 | 0.340 | 3.731  | 1.9E-04 | 0.00086601 | Gm4742        |
| ENSMUSG00000110188 | 17.833     | 1.268 | 0.498 | 2.547  | 1.1E-02 | 0.03367405 | Gm45432       |
| ENSMUSG00000027220 | 1021.439   | 1.268 | 0.255 | 4.970  | 6.7E-07 | 4.2966E-06 | Syt13         |
| ENSMUSG00000098154 | 28.528     | 1.266 | 0.396 | 3.198  | 1.4E-03 | 0.00534904 | Gm5787        |
| ENSMUSG00000032184 | 268.543    | 1.265 | 0.263 | 4.817  | 1.5E-06 | 8.9836E-06 | Lysmd2        |
| ENSMUSG00000015656 | 73452.268  | 1.263 | 0.075 | 16.873 | 7.1E-64 | 5.874E-62  | Hspa8         |
| ENSMUSG00000093973 | 48.882     | 1.260 | 0.414 | 3.044  | 2.3E-03 | 0.00861423 | Mrgpra2a      |
| ENSMUSG00000023010 | 95040.427  | 1.260 | 0.075 | 16.744 | 6.3E-63 | 5.0358E-61 | Tmbim6        |
| ENSMUSG00000029553 | 1794.226   | 1.260 | 0.126 | 9.970  | 2.1E-23 | 4.4522E-22 | Tfec          |
| ENSMUSG00000027322 | 2431.219   | 1.259 | 0.245 | 5.148  | 2.6E-07 | 1.779E-06  | Siglec1       |
| ENSMUSG00000032369 | 2568.206   | 1.259 | 0.116 | 10.815 | 2.9E-27 | 7.326E-26  | Plscr1        |
| ENSMUSG00000105199 | 53.989     | 1.259 | 0.525 | 2.398  | 1.6E-02 | 0.04853831 | Gm43581       |
| ENSMUSG00000031393 | 2172.365   | 1.257 | 0.112 | 11.210 | 3.6E-29 | 9.8931E-28 | Mecp2         |
| ENSMUSG00000031880 | 1022.164   | 1.256 | 0.130 | 9.672  | 4.0E-22 | 8.022E-21  | Rrad          |
| ENSMUSG00000034731 | 1446.091   | 1.255 | 0.138 | 9.087  | 1.0E-19 | 1.8131E-18 | Dgkh          |
| ENSMUSG00000087007 | 263.588    | 1.255 | 0.455 | 2.757  | 5.8E-03 | 0.01955654 | Gm2231        |
| ENSMUSG00000026196 | 48.187     | 1.254 | 0.438 | 2.865  | 4.2E-03 | 0.01449894 | Bard1         |
| ENSMUSG00000057110 | 1757.753   | 1.254 | 0.129 | 9.696  | 3.1E-22 | 6.3591E-21 | Cntrl         |
| ENSMUSG00000002602 | 23369.937  | 1.253 | 0.106 | 11.812 | 3.4E-32 | 1.0406E-30 | Axl           |
| ENSMUSG00000005483 | 7644.968   | 1.252 | 0.093 | 13.485 | 1.9E-41 | 8.189E-40  | Dnajb1        |
| ENSMUSG00000085741 | 611.477    | 1.252 | 0.185 | 6.757  | 1.4E-11 | 1.4386E-10 | 5430405H02Rik |
| ENSMUSG00000032119 | 953.545    | 1.250 | 0.163 | 7.694  | 1.4E-14 | 1.836E-13  | Hinfp         |
| ENSMUSG00000103572 | 67.135     | 1.247 | 0.448 | 2.782  | 5.4E-03 | 0.01827427 | Gm37115       |
| ENSMUSG00000019843 | 1974.569   | 1.247 | 0.152 | 8.188  | 2.7E-16 | 3.8311E-15 | Fyn           |
| ENSMUSG00000026395 | 35904.944  | 1.247 | 0.080 | 15.566 | 1.2E-54 | 7.7646E-53 | Ptprc         |
| ENSMUSG00000038658 | 3687.537   | 1.246 | 0.134 | 9.281  | 1.7E-20 | 3.1183E-19 | Ric1          |

|                    |           |       |       |        |         |            |               |
|--------------------|-----------|-------|-------|--------|---------|------------|---------------|
| ENSMUSG00000047181 | 952.442   | 1.246 | 0.243 | 5.131  | 2.9E-07 | 1.9436E-06 | Samd14        |
| ENSMUSG00000044468 | 902.968   | 1.246 | 0.335 | 3.718  | 2.0E-04 | 0.00090578 | Tent5c        |
| ENSMUSG00000114023 | 22.381    | 1.244 | 0.492 | 2.529  | 1.1E-02 | 0.03523658 | Gm6474        |
| ENSMUSG00000107428 | 29.062    | 1.244 | 0.521 | 2.388  | 1.7E-02 | 0.04969412 | Gm44154       |
| ENSMUSG00000019929 | 649.483   | 1.244 | 0.285 | 4.368  | 1.3E-05 | 6.8308E-05 | Dcn           |
| ENSMUSG00000000732 | 1355.770  | 1.243 | 0.192 | 6.471  | 9.7E-11 | 9.3319E-10 | Icos1         |
| ENSMUSG00000022973 | 4230.244  | 1.243 | 0.151 | 8.248  | 1.6E-16 | 2.3609E-15 | Synj1         |
| ENSMUSG00000074629 | 603.901   | 1.242 | 0.172 | 7.204  | 5.8E-13 | 6.7419E-12 | 4930518I15Rik |
| ENSMUSG00000078994 | 478.582   | 1.241 | 0.216 | 5.736  | 9.7E-09 | 7.7636E-08 | Zfp429        |
| ENSMUSG00000026815 | 689.088   | 1.241 | 0.314 | 3.945  | 8.0E-05 | 0.00038422 | Gfi1b         |
| ENSMUSG00000023224 | 3664.260  | 1.241 | 0.146 | 8.527  | 1.5E-17 | 2.3605E-16 | Serping1      |
| ENSMUSG00000015501 | 656.336   | 1.241 | 0.196 | 6.323  | 2.6E-10 | 2.3899E-09 | Hivep2        |
| ENSMUSG00000079685 | 589.390   | 1.240 | 0.184 | 6.755  | 1.4E-11 | 1.4634E-10 | Ulbp1         |
| ENSMUSG00000004814 | 1866.663  | 1.240 | 0.270 | 4.594  | 4.3E-06 | 2.5271E-05 | Ccl24         |
| ENSMUSG00000070729 | 42.829    | 1.240 | 0.365 | 3.399  | 6.8E-04 | 0.00276665 | Gm12966       |
| ENSMUSG00000037434 | 997.164   | 1.239 | 0.267 | 4.643  | 3.4E-06 | 2.0338E-05 | Slc30a1       |
| ENSMUSG00000025791 | 3405.884  | 1.238 | 0.113 | 10.927 | 8.6E-28 | 2.2136E-26 | Pgm1          |
| ENSMUSG00000063445 | 810.677   | 1.237 | 0.169 | 7.303  | 2.8E-13 | 3.3448E-12 | Nmral1        |
| ENSMUSG00000001630 | 862.858   | 1.237 | 0.177 | 6.998  | 2.6E-12 | 2.8514E-11 | Stk381        |
| ENSMUSG00000031402 | 18383.014 | 1.236 | 0.097 | 12.721 | 4.5E-37 | 1.6748E-35 | Mpp1          |
| ENSMUSG00000110206 | 112.860   | 1.236 | 0.340 | 3.635  | 2.8E-04 | 0.0012284  | Flt3l         |
| ENSMUSG00000020115 | 6180.965  | 1.236 | 0.111 | 11.092 | 1.4E-28 | 3.6626E-27 | Tbk1          |
| ENSMUSG00000050473 | 416.358   | 1.235 | 0.278 | 4.449  | 8.6E-06 | 4.8328E-05 | Slc35d3       |
| ENSMUSG00000002881 | 5457.141  | 1.235 | 0.238 | 5.178  | 2.2E-07 | 1.5329E-06 | Nab1          |
| ENSMUSG00000117975 | 2354.980  | 1.234 | 0.151 | 8.178  | 2.9E-16 | 4.1506E-15 | Itprlp        |
| ENSMUSG00000099397 | 81.565    | 1.233 | 0.279 | 4.414  | 1.0E-05 | 5.6134E-05 | Gm7809        |
| ENSMUSG00000003308 | 7527.560  | 1.233 | 0.108 | 11.468 | 1.9E-30 | 5.5099E-29 | Keap1         |
| ENSMUSG00000020743 | 2525.051  | 1.233 | 0.099 | 12.446 | 1.5E-35 | 5.1214E-34 | Mif4gd        |
| ENSMUSG00000024404 | 15170.737 | 1.231 | 0.091 | 13.541 | 8.9E-42 | 3.8766E-40 | Riok3         |
| ENSMUSG00000037161 | 140.344   | 1.231 | 0.372 | 3.310  | 9.3E-04 | 0.00371816 | Mgarp         |
| ENSMUSG00000029449 | 550.115   | 1.230 | 0.247 | 4.980  | 6.4E-07 | 4.1001E-06 | Rhof          |
| ENSMUSG00000075700 | 1456.822  | 1.229 | 0.130 | 9.472  | 2.8E-21 | 5.326E-20  | Selenot       |
| ENSMUSG00000031154 | 13439.854 | 1.229 | 0.127 | 9.671  | 4.0E-22 | 8.0362E-21 | Otud5         |
| ENSMUSG00000030055 | 637.226   | 1.229 | 0.204 | 6.034  | 1.6E-09 | 1.38E-08   | Rab43         |
| ENSMUSG00000026347 | 86.383    | 1.228 | 0.466 | 2.635  | 8.4E-03 | 0.02695026 | Tmem163       |
| ENSMUSG00000048106 | 976.171   | 1.228 | 0.135 | 9.061  | 1.3E-19 | 2.285E-18  | 4632415L05Rik |
| ENSMUSG00000024431 | 8253.055  | 1.227 | 0.123 | 10.004 | 1.5E-23 | 3.1673E-22 | Nr3c1         |
| ENSMUSG00000021356 | 133.890   | 1.226 | 0.372 | 3.297  | 9.8E-04 | 0.00388733 | Irf4          |
| ENSMUSG00000027030 | 647.443   | 1.226 | 0.183 | 6.714  | 1.9E-11 | 1.9175E-10 | Stk39         |
| ENSMUSG00000028630 | 2286.349  | 1.225 | 0.134 | 9.166  | 4.9E-20 | 8.9223E-19 | Dyrk2         |
| ENSMUSG00000074978 | 74.205    | 1.225 | 0.309 | 3.966  | 7.3E-05 | 0.00035517 | Actg-ps1      |
| ENSMUSG00000039536 | 6545.919  | 1.225 | 0.113 | 10.800 | 3.4E-27 | 8.621E-26  | Stau1         |
| ENSMUSG00000020128 | 1870.723  | 1.225 | 0.187 | 6.556  | 5.5E-11 | 5.4053E-10 | Vps54         |
| ENSMUSG00000044477 | 4791.336  | 1.225 | 0.092 | 13.322 | 1.7E-40 | 7.1476E-39 | Zfand3        |
| ENSMUSG00000027215 | 5678.239  | 1.224 | 0.086 | 14.162 | 1.6E-45 | 7.6524E-44 | Cd82          |
| ENSMUSG00000032783 | 217.876   | 1.224 | 0.317 | 3.858  | 1.1E-04 | 0.00053646 | Troap         |
| ENSMUSG00000100222 | 59.339    | 1.222 | 0.300 | 4.071  | 4.7E-05 | 0.00023414 | Psmb6-ps2     |
| ENSMUSG00000059436 | 2625.550  | 1.222 | 0.159 | 7.707  | 1.3E-14 | 1.6569E-13 | Max           |
| ENSMUSG00000032548 | 461.126   | 1.222 | 0.235 | 5.210  | 1.9E-07 | 1.3024E-06 | Slco2a1       |
| ENSMUSG00000071715 | 15447.539 | 1.222 | 0.080 | 15.353 | 3.4E-53 | 2.0657E-51 | Ncf4          |
| ENSMUSG00000083960 | 54.834    | 1.220 | 0.327 | 3.733  | 1.9E-04 | 0.0008589  | Gm4918        |
| ENSMUSG00000084260 | 100.701   | 1.220 | 0.342 | 3.562  | 3.7E-04 | 0.00158595 | Gm12844       |

|                    |            |       |       |        |         |            |               |
|--------------------|------------|-------|-------|--------|---------|------------|---------------|
| ENSMUSG00000019796 | 960.749    | 1.219 | 0.223 | 5.474  | 4.4E-08 | 3.2805E-07 | Lrp11         |
| ENSMUSG00000020689 | 3672.017   | 1.219 | 0.208 | 5.865  | 4.5E-09 | 3.732E-08  | Itgb3         |
| ENSMUSG00000037062 | 24482.584  | 1.219 | 0.091 | 13.414 | 5.0E-41 | 2.122E-39  | Sh3glb1       |
| ENSMUSG00000074677 | 1574.816   | 1.217 | 0.163 | 7.461  | 8.6E-14 | 1.0488E-12 | Sirpb1c       |
| ENSMUSG00000029405 | 14075.599  | 1.215 | 0.103 | 11.755 | 6.7E-32 | 2.0223E-30 | G3bp2         |
| ENSMUSG00000086507 | 7292.560   | 1.215 | 0.172 | 7.076  | 1.5E-12 | 1.6454E-11 | Adap2os       |
| ENSMUSG00000073418 | 337.216    | 1.215 | 0.322 | 3.776  | 1.6E-04 | 0.00073354 | C4b           |
| ENSMUSG00000024457 | 5355.152   | 1.215 | 0.144 | 8.458  | 2.7E-17 | 4.1892E-16 | Trim26        |
| ENSMUSG00000060802 | 188886.582 | 1.214 | 0.129 | 9.391  | 6.0E-21 | 1.1322E-19 | B2m           |
| ENSMUSG00000075254 | 741.977    | 1.214 | 0.212 | 5.723  | 1.0E-08 | 8.3513E-08 | Heg1          |
| ENSMUSG00000104436 | 484.813    | 1.213 | 0.228 | 5.316  | 1.1E-07 | 7.5424E-07 | Gm37423       |
| ENSMUSG00000063236 | 3165.571   | 1.213 | 0.106 | 11.419 | 3.4E-30 | 9.6017E-29 | 1110038F14Rik |
| ENSMUSG00000040043 | 1923.430   | 1.211 | 0.115 | 10.491 | 9.5E-26 | 2.2471E-24 | Rbms2         |
| ENSMUSG00000073557 | 646.070    | 1.210 | 0.175 | 6.912  | 4.8E-12 | 5.1067E-11 | Ppp1r12b      |
| ENSMUSG00000020787 | 1222.809   | 1.210 | 0.212 | 5.716  | 1.1E-08 | 8.6555E-08 | P2rx1         |
| ENSMUSG00000036634 | 286.982    | 1.209 | 0.341 | 3.544  | 3.9E-04 | 0.00168503 | Mag           |
| ENSMUSG00000019979 | 2201.212   | 1.209 | 0.135 | 8.944  | 3.8E-19 | 6.486E-18  | Apaf1         |
| ENSMUSG00000026009 | 82.248     | 1.208 | 0.445 | 2.713  | 6.7E-03 | 0.02199295 | Icos          |
| ENSMUSG00000034116 | 11823.711  | 1.208 | 0.068 | 17.863 | 2.3E-71 | 2.2298E-69 | Vav1          |
| ENSMUSG00000112597 | 28.112     | 1.208 | 0.460 | 2.625  | 8.7E-03 | 0.02761707 | Gm4777        |
| ENSMUSG00000016255 | 730.325    | 1.207 | 0.344 | 3.505  | 4.6E-04 | 0.00192636 | Tubb1         |
| ENSMUSG00000047878 | 289.284    | 1.207 | 0.228 | 5.287  | 1.2E-07 | 8.7638E-07 | A4galt        |
| ENSMUSG00000026068 | 360.096    | 1.207 | 0.338 | 3.577  | 3.5E-04 | 0.00150329 | Il18rap       |
| ENSMUSG00000034664 | 4557.528   | 1.206 | 0.238 | 5.069  | 4.0E-07 | 2.6437E-06 | Itga2b        |
| ENSMUSG00000027508 | 869.207    | 1.202 | 0.192 | 6.253  | 4.0E-10 | 3.6853E-09 | Pag1          |
| ENSMUSG00000057554 | 8400.891   | 1.202 | 0.124 | 9.685  | 3.5E-22 | 7.0733E-21 | Lgals8        |
| ENSMUSG00000032024 | 666.584    | 1.201 | 0.199 | 6.033  | 1.6E-09 | 1.3895E-08 | Clmp          |
| ENSMUSG00000087370 | 3345.266   | 1.201 | 0.123 | 9.787  | 1.3E-22 | 2.6489E-21 | Tmem170b      |
| ENSMUSG00000022512 | 325.937    | 1.200 | 0.263 | 4.562  | 5.1E-06 | 2.9198E-05 | Cldn1         |
| ENSMUSG00000038550 | 265.933    | 1.199 | 0.294 | 4.083  | 4.4E-05 | 0.00022299 | Ciart         |
| ENSMUSG00000089647 | 241.549    | 1.198 | 0.309 | 3.878  | 1.1E-04 | 0.00049724 | Gm2245        |
| ENSMUSG00000040007 | 1680.895   | 1.197 | 0.229 | 5.216  | 1.8E-07 | 1.2658E-06 | Bahd1         |
| ENSMUSG00000003226 | 3433.637   | 1.197 | 0.131 | 9.102  | 8.9E-20 | 1.5898E-18 | Ranbp2        |
| ENSMUSG00000032202 | 1889.718   | 1.195 | 0.132 | 9.073  | 1.2E-19 | 2.0534E-18 | Rab27a        |
| ENSMUSG00000022864 | 990.240    | 1.195 | 0.196 | 6.102  | 1.0E-09 | 9.2023E-09 | Dl16Ertd472e  |
| ENSMUSG00000092526 | 81.902     | 1.194 | 0.436 | 2.738  | 6.2E-03 | 0.02055355 | Gm17907       |
| ENSMUSG00000034343 | 9158.138   | 1.193 | 0.071 | 16.829 | 1.5E-63 | 1.2131E-61 | Ube2f         |
| ENSMUSG00000064181 | 830.447    | 1.193 | 0.200 | 5.956  | 2.6E-09 | 2.1875E-08 | Rab3ip        |
| ENSMUSG00000033902 | 580.655    | 1.193 | 0.223 | 5.358  | 8.4E-08 | 6.0799E-07 | Mapkbp1       |
| ENSMUSG00000102964 | 206.288    | 1.192 | 0.277 | 4.306  | 1.7E-05 | 8.8955E-05 | 9430034N14Rik |
| ENSMUSG00000092134 | 60.503     | 1.192 | 0.416 | 2.865  | 4.2E-03 | 0.01448085 | Gm17089       |
| ENSMUSG00000032344 | 1384.741   | 1.192 | 0.167 | 7.126  | 1.0E-12 | 1.1599E-11 | Cgas          |
| ENSMUSG00000036002 | 4173.823   | 1.192 | 0.120 | 9.953  | 2.4E-23 | 5.2209E-22 | Fam214b       |
| ENSMUSG00000048832 | 6772.976   | 1.191 | 0.106 | 11.235 | 2.7E-29 | 7.528E-28  | Vps37c        |
| ENSMUSG00000083166 | 373.896    | 1.190 | 0.173 | 6.884  | 5.8E-12 | 6.1694E-11 | Gm8648        |
| ENSMUSG00000047153 | 1216.392   | 1.190 | 0.167 | 7.149  | 8.7E-13 | 9.8862E-12 | Khynyn        |
| ENSMUSG00000087569 | 807.662    | 1.189 | 0.139 | 8.570  | 1.0E-17 | 1.6501E-16 | Actb-ps1      |
| ENSMUSG00000022964 | 8702.455   | 1.187 | 0.114 | 10.442 | 1.6E-25 | 3.7237E-24 | Tmem50b       |
| ENSMUSG00000031701 | 16253.917  | 1.187 | 0.086 | 13.846 | 1.4E-43 | 6.1355E-42 | Dnaja2        |
| ENSMUSG00000042772 | 4691.212   | 1.187 | 0.091 | 13.036 | 7.6E-39 | 3.0123E-37 | Smg7          |
| ENSMUSG00000041390 | 5616.361   | 1.184 | 0.123 | 9.650  | 4.9E-22 | 9.8448E-21 | Mdfic         |
| ENSMUSG00000060791 | 3617.953   | 1.184 | 0.130 | 9.129  | 6.9E-20 | 1.2405E-18 | Gmfg          |



|                    |           |       |       |        |         |            |               |
|--------------------|-----------|-------|-------|--------|---------|------------|---------------|
| ENSMUSG00000019832 | 26841.852 | 1.183 | 0.078 | 15.089 | 1.9E-51 | 1.11E-49   | Rab32         |
| ENSMUSG00000092325 | 52.271    | 1.183 | 0.335 | 3.535  | 4.1E-04 | 0.00173811 | Gm18284       |
| ENSMUSG00000032841 | 1094.391  | 1.183 | 0.225 | 5.267  | 1.4E-07 | 9.7541E-07 | Prr51         |
| ENSMUSG00000085486 | 43.131    | 1.183 | 0.402 | 2.940  | 3.3E-03 | 0.01172989 | Gm11634       |
| ENSMUSG00000057193 | 4263.906  | 1.182 | 0.113 | 10.433 | 1.8E-25 | 4.0836E-24 | Slc44a2       |
| ENSMUSG00000078810 | 473.885   | 1.182 | 0.327 | 3.617  | 3.0E-04 | 0.00130424 | Gp6           |
| ENSMUSG00000031174 | 110.620   | 1.181 | 0.397 | 2.976  | 2.9E-03 | 0.01053667 | Rpgr          |
| ENSMUSG00000037172 | 244.976   | 1.181 | 0.235 | 5.035  | 4.8E-07 | 3.123E-06  | Dennd11       |
| ENSMUSG00000022965 | 19402.890 | 1.181 | 0.079 | 14.873 | 4.9E-50 | 2.7297E-48 | Ifngr2        |
| ENSMUSG00000026069 | 1152.851  | 1.180 | 0.215 | 5.479  | 4.3E-08 | 3.1973E-07 | Il1rl1        |
| ENSMUSG00000048234 | 9356.832  | 1.179 | 0.105 | 11.237 | 2.7E-29 | 7.3753E-28 | Rnfl149       |
| ENSMUSG00000040811 | 542.459   | 1.177 | 0.207 | 5.699  | 1.2E-08 | 9.5095E-08 | Eml2          |
| ENSMUSG00000085347 | 70.507    | 1.177 | 0.458 | 2.568  | 1.0E-02 | 0.03188515 | Hk1os         |
| ENSMUSG00000024539 | 3246.447  | 1.177 | 0.097 | 12.111 | 9.2E-34 | 3.0219E-32 | Ptpn2         |
| ENSMUSG00000020737 | 25977.381 | 1.176 | 0.066 | 17.788 | 8.8E-71 | 8.5018E-69 | Jpt1          |
| ENSMUSG00000007458 | 34567.244 | 1.176 | 0.074 | 15.854 | 1.3E-56 | 8.8792E-55 | M6pr          |
| ENSMUSG00000043051 | 214.863   | 1.175 | 0.245 | 4.789  | 1.7E-06 | 1.0304E-05 | Disc1         |
| ENSMUSG00000057948 | 2493.425  | 1.173 | 0.127 | 9.234  | 2.6E-20 | 4.8047E-19 | Unc13d        |
| ENSMUSG00000104434 | 55.064    | 1.173 | 0.329 | 3.566  | 3.6E-04 | 0.0015605  | Gm37421       |
| ENSMUSG00000069873 | 554.510   | 1.173 | 0.275 | 4.256  | 2.1E-05 | 0.00010958 | 4930438A08Rik |
| ENSMUSG00000111160 | 542.068   | 1.172 | 0.245 | 4.783  | 1.7E-06 | 1.0597E-05 | Gm48855       |
| ENSMUSG00000021831 | 3697.208  | 1.171 | 0.111 | 10.560 | 4.6E-26 | 1.0879E-24 | Ero1a         |
| ENSMUSG00000039294 | 7660.071  | 1.171 | 0.102 | 11.477 | 1.7E-30 | 4.9503E-29 | Cybc1         |
| ENSMUSG00000062380 | 615.383   | 1.169 | 0.276 | 4.238  | 2.3E-05 | 0.00011859 | Tubb3         |
| ENSMUSG00000039158 | 3437.140  | 1.169 | 0.117 | 9.999  | 1.5E-23 | 3.3265E-22 | Akna          |
| ENSMUSG00000057789 | 3094.622  | 1.167 | 0.145 | 8.037  | 9.2E-16 | 1.2847E-14 | Bak1          |
| ENSMUSG00000080775 | 40.026    | 1.166 | 0.332 | 3.507  | 4.5E-04 | 0.00191679 | Gm6368        |
| ENSMUSG00000025036 | 1045.596  | 1.165 | 0.131 | 8.897  | 5.7E-19 | 9.8047E-18 | Sfxn2         |
| ENSMUSG00000069895 | 797.581   | 1.165 | 0.155 | 7.524  | 5.3E-14 | 6.608E-13  | Atxn11        |
| ENSMUSG00000083089 | 54.362    | 1.165 | 0.302 | 3.856  | 1.2E-04 | 0.00054086 | Gm4760        |
| ENSMUSG00000082691 | 40.216    | 1.164 | 0.394 | 2.950  | 3.2E-03 | 0.0113641  | Dynlt1-ps1    |
| ENSMUSG00000047867 | 393.765   | 1.163 | 0.229 | 5.083  | 3.7E-07 | 2.4716E-06 | Gimap6        |
| ENSMUSG00000045038 | 152.839   | 1.163 | 0.360 | 3.228  | 1.2E-03 | 0.00485821 | Prkce         |
| ENSMUSG00000035547 | 1073.235  | 1.161 | 0.196 | 5.921  | 3.2E-09 | 2.6925E-08 | Capn5         |
| ENSMUSG00000030930 | 583.105   | 1.161 | 0.192 | 6.043  | 1.5E-09 | 1.3099E-08 | Chst15        |
| ENSMUSG00000032089 | 8031.434  | 1.160 | 0.146 | 7.968  | 1.6E-15 | 2.2048E-14 | Il10ra        |
| ENSMUSG00000022037 | 2667.987  | 1.159 | 0.257 | 4.504  | 6.7E-06 | 3.7932E-05 | Clu           |
| ENSMUSG00000118134 | 48.341    | 1.158 | 0.417 | 2.777  | 5.5E-03 | 0.01851835 | 4930549G23Rik |
| ENSMUSG00000020023 | 3083.689  | 1.158 | 0.166 | 6.976  | 3.0E-12 | 3.313E-11  | Tmcc3         |
| ENSMUSG00000037331 | 1063.772  | 1.158 | 0.190 | 6.103  | 1.0E-09 | 9.1289E-09 | Larp1         |
| ENSMUSG00000034573 | 127.510   | 1.157 | 0.458 | 2.526  | 1.2E-02 | 0.03550574 | Ptpn13        |
| ENSMUSG00000107863 | 47.109    | 1.157 | 0.384 | 3.011  | 2.6E-03 | 0.00949853 | Gm44389       |
| ENSMUSG00000017713 | 546.305   | 1.157 | 0.267 | 4.329  | 1.5E-05 | 8.0606E-05 | Tha1          |
| ENSMUSG00000030447 | 27531.992 | 1.157 | 0.131 | 8.804  | 1.3E-18 | 2.2078E-17 | Cyfip1        |
| ENSMUSG00000043671 | 291.352   | 1.156 | 0.271 | 4.271  | 1.9E-05 | 0.000103   | Dpy1913       |
| ENSMUSG00000024732 | 6880.570  | 1.155 | 0.078 | 14.879 | 4.5E-50 | 2.5001E-48 | Ccdc86        |
| ENSMUSG00000028954 | 4687.304  | 1.155 | 0.100 | 11.559 | 6.6E-31 | 1.9378E-29 | Nub1          |
| ENSMUSG00000052013 | 64.958    | 1.155 | 0.461 | 2.508  | 1.2E-02 | 0.03713955 | Btla          |
| ENSMUSG00000071757 | 315.848   | 1.155 | 0.248 | 4.662  | 3.1E-06 | 1.8596E-05 | Zhx2          |
| ENSMUSG00000096160 | 33.968    | 1.153 | 0.370 | 3.113  | 1.9E-03 | 0.00697526 | Gm3436        |
| ENSMUSG00000084013 | 77.298    | 1.153 | 0.274 | 4.213  | 2.5E-05 | 0.00013108 | Gm14270       |
| ENSMUSG00000072621 | 1952.640  | 1.151 | 0.168 | 6.863  | 6.7E-12 | 7.0736E-11 | Slfn10-ps     |

|                     |           |       |       |        |         |            |               |
|---------------------|-----------|-------|-------|--------|---------|------------|---------------|
| ENSMUSG00000050675  | 1360.315  | 1.151 | 0.275 | 4.184  | 2.9E-05 | 0.00014744 | Gp1ba         |
| ENSMUSG00000021242  | 82813.823 | 1.151 | 0.124 | 9.295  | 1.5E-20 | 2.7477E-19 | Npc2          |
| ENSMUSG00000002111  | 65806.555 | 1.150 | 0.073 | 15.813 | 2.5E-56 | 1.6909E-54 | Sp1l          |
| ENSMUSG00000022757  | 10242.003 | 1.150 | 0.102 | 11.296 | 1.4E-29 | 3.7965E-28 | Tfg           |
| ENSMUSG00000078995  | 171.092   | 1.149 | 0.390 | 2.948  | 3.2E-03 | 0.01142915 | Zfp456        |
| ENSMUSG00000035105  | 618.545   | 1.148 | 0.194 | 5.928  | 3.1E-09 | 2.5818E-08 | Egln3         |
| ENSMUSG00000059456  | 9971.635  | 1.148 | 0.100 | 11.476 | 1.7E-30 | 5.0427E-29 | Ptk2b         |
| ENSMUSG00000091905  | 99.636    | 1.147 | 0.265 | 4.324  | 1.5E-05 | 8.2443E-05 | Dnajb6-ps     |
| ENSMUSG00000003208  | 1646.297  | 1.146 | 0.191 | 6.005  | 1.9E-09 | 1.6427E-08 | Yju2          |
| ENSMUSG00000087484  | 49.024    | 1.145 | 0.365 | 3.142  | 1.7E-03 | 0.00637948 | 2900089D17Rik |
| ENSMUSG00000005267  | 299.009   | 1.144 | 0.315 | 3.634  | 2.8E-04 | 0.00123142 | Zfp287        |
| ENSMUSG00000021707  | 477.331   | 1.144 | 0.168 | 6.788  | 1.1E-11 | 1.174E-10  | Dhfr          |
| ENSMUSG00000089698  | 52.151    | 1.143 | 0.374 | 3.053  | 2.3E-03 | 0.00837243 | Gm2541        |
| ENSMUSG00000019996  | 84.697    | 1.143 | 0.410 | 2.787  | 5.3E-03 | 0.01804735 | Map7          |
| ENSMUSG00000032412  | 31076.966 | 1.142 | 0.080 | 14.328 | 1.5E-46 | 7.173E-45  | Atp1b3        |
| ENSMUSG00000049526  | 183.443   | 1.142 | 0.236 | 4.850  | 1.2E-06 | 7.7062E-06 | Tmem202       |
| ENSMUSG00000054435  | 166.739   | 1.142 | 0.266 | 4.286  | 1.8E-05 | 9.6918E-05 | Gimap4        |
| ENSMUSG00000024851  | 4019.807  | 1.141 | 0.140 | 8.146  | 3.8E-16 | 5.396E-15  | Pitpnm1       |
| ENSMUSG00000050914  | 251.298   | 1.141 | 0.226 | 5.046  | 4.5E-07 | 2.9522E-06 | Ankrd37       |
| ENSMUSG00000020642  | 575.769   | 1.140 | 0.324 | 3.516  | 4.4E-04 | 0.00185902 | Rnf144a       |
| ENSMUSG00000024219  | 1644.819  | 1.140 | 0.156 | 7.317  | 2.5E-13 | 3.02E-12   | Anks1         |
| ENSMUSG00000052681  | 46581.044 | 1.140 | 0.094 | 12.109 | 9.4E-34 | 3.0841E-32 | Rap1b         |
| ENSMUSG00000026779  | 175.092   | 1.136 | 0.300 | 3.783  | 1.6E-04 | 0.00071543 | Mastl         |
| ENSMUSG00000031714  | 1258.709  | 1.136 | 0.190 | 5.982  | 2.2E-09 | 1.8785E-08 | Gab1          |
| ENSMUSG00000053062  | 129.805   | 1.134 | 0.360 | 3.153  | 1.6E-03 | 0.00616184 | Jam2          |
| ENSMUSG00000048376  | 1084.703  | 1.134 | 0.223 | 5.082  | 3.7E-07 | 2.4784E-06 | F2r           |
| ENSMUSG00000039765  | 65.324    | 1.133 | 0.408 | 2.775  | 5.5E-03 | 0.01863382 | Cc2d2a        |
| ENSMUSG00000038855  | 3894.142  | 1.133 | 0.142 | 7.977  | 1.5E-15 | 2.0441E-14 | Itpkb         |
| ENSMUSG00000042790  | 1644.693  | 1.130 | 0.122 | 9.241  | 2.4E-20 | 4.4922E-19 | Rnf214        |
| ENSMUSG00000030724  | 192.105   | 1.129 | 0.340 | 3.326  | 8.8E-04 | 0.00352691 | Cd19          |
| ENSMUSG00000026159  | 4091.402  | 1.129 | 0.127 | 8.880  | 6.7E-19 | 1.1394E-17 | Agfg1         |
| ENSMUSG00000026657  | 3718.104  | 1.129 | 0.151 | 7.497  | 6.5E-14 | 8.0472E-13 | Frmf4a        |
| ENSMUSG00000027900  | 7573.025  | 1.128 | 0.109 | 10.350 | 4.2E-25 | 9.5898E-24 | Dram2         |
| ENSMUSG00000021147  | 1496.843  | 1.128 | 0.144 | 7.842  | 4.4E-15 | 5.8797E-14 | Wdr37         |
| ENSMUSG00000079017  | 19928.985 | 1.127 | 0.303 | 3.721  | 2.0E-04 | 0.00089569 | Ifi2712a      |
| ENSMUSG00000018168  | 108.881   | 1.127 | 0.446 | 2.530  | 1.1E-02 | 0.03518644 | Ikzf3         |
| ENSMUSG00000082454  | 128.711   | 1.127 | 0.333 | 3.381  | 7.2E-04 | 0.00294346 | Gm12183       |
| ENSMUSG000000108009 | 42.857    | 1.126 | 0.355 | 3.176  | 1.5E-03 | 0.0057296  | Gm44279       |
| ENSMUSG00000026003  | 8489.915  | 1.126 | 0.083 | 13.597 | 4.2E-42 | 1.8257E-40 | Acadl         |
| ENSMUSG00000001750  | 29631.788 | 1.126 | 0.104 | 10.828 | 2.5E-27 | 6.3556E-26 | Teirg1        |
| ENSMUSG00000002845  | 1391.022  | 1.125 | 0.126 | 8.898  | 5.7E-19 | 9.724E-18  | Tmem39a       |
| ENSMUSG00000029359  | 872.677   | 1.125 | 0.243 | 4.622  | 3.8E-06 | 2.2334E-05 | Tesc          |
| ENSMUSG00000020671  | 18204.208 | 1.125 | 0.074 | 15.263 | 1.3E-52 | 8.0656E-51 | Rab10         |
| ENSMUSG00000020277  | 18900.405 | 1.125 | 0.091 | 12.379 | 3.4E-35 | 1.1695E-33 | Pfkl          |
| ENSMUSG00000039853  | 4675.150  | 1.124 | 0.182 | 6.166  | 7.0E-10 | 6.2616E-09 | Trim14        |
| ENSMUSG00000044337  | 130.669   | 1.123 | 0.423 | 2.655  | 7.9E-03 | 0.02554133 | Ackr3         |
| ENSMUSG00000070691  | 1204.125  | 1.121 | 0.195 | 5.749  | 9.0E-09 | 7.2037E-08 | Runx3         |
| ENSMUSG00000003865  | 1771.793  | 1.121 | 0.129 | 8.715  | 2.9E-18 | 4.784E-17  | Gys1          |
| ENSMUSG00000028716  | 948.527   | 1.119 | 0.216 | 5.176  | 2.3E-07 | 1.5466E-06 | Pdzk1ip1      |
| ENSMUSG00000022272  | 3079.762  | 1.119 | 0.147 | 7.617  | 2.6E-14 | 3.2705E-13 | Myo10         |
| ENSMUSG00000004846  | 9835.571  | 1.119 | 0.087 | 12.875 | 6.2E-38 | 2.3727E-36 | Plod3         |
| ENSMUSG00000074580  | 550.168   | 1.119 | 0.182 | 6.138  | 8.4E-10 | 7.413E-09  | 4931440P22Rik |

|                    |           |       |       |        |         |            |               |
|--------------------|-----------|-------|-------|--------|---------|------------|---------------|
| ENSMUSG00000019992 | 126.769   | 1.119 | 0.432 | 2.590  | 9.6E-03 | 0.03011515 | Mtfr2         |
| ENSMUSG00000100071 | 78.532    | 1.117 | 0.335 | 3.338  | 8.4E-04 | 0.00339008 | Gm28707       |
| ENSMUSG00000056313 | 51.127    | 1.117 | 0.461 | 2.421  | 1.5E-02 | 0.04590194 | Tcim          |
| ENSMUSG00000050896 | 128.564   | 1.116 | 0.386 | 2.894  | 3.8E-03 | 0.01334298 | Rtn4rl2       |
| ENSMUSG00000043257 | 1804.091  | 1.116 | 0.138 | 8.096  | 5.7E-16 | 7.9974E-15 | Pigv          |
| ENSMUSG00000001249 | 198.912   | 1.116 | 0.388 | 2.874  | 4.1E-03 | 0.0141385  | Hpn           |
| ENSMUSG00000038357 | 34790.747 | 1.115 | 0.203 | 5.484  | 4.2E-08 | 3.1121E-07 | Camp          |
| ENSMUSG00000038456 | 665.399   | 1.114 | 0.166 | 6.692  | 2.2E-11 | 2.2299E-10 | Dennd2a       |
| ENSMUSG00000016831 | 6830.735  | 1.114 | 0.137 | 8.154  | 3.5E-16 | 5.0612E-15 | Tox4          |
| ENSMUSG00000110545 | 264.749   | 1.113 | 0.182 | 6.108  | 1.0E-09 | 8.8588E-09 | Gm7730        |
| ENSMUSG00000063314 | 57.805    | 1.113 | 0.436 | 2.554  | 1.1E-02 | 0.03309373 | Gm12657       |
| ENSMUSG00000020340 | 2821.763  | 1.113 | 0.175 | 6.343  | 2.3E-10 | 2.105E-09  | Cyfp2         |
| ENSMUSG00000034028 | 596.062   | 1.111 | 0.368 | 3.018  | 2.5E-03 | 0.00930477 | Cd226         |
| ENSMUSG00000109495 | 197.492   | 1.111 | 0.191 | 5.806  | 6.4E-09 | 5.2109E-08 | Gm47692       |
| ENSMUSG00000031207 | 66794.365 | 1.110 | 0.077 | 14.339 | 1.3E-46 | 6.2178E-45 | Msn           |
| ENSMUSG00000041548 | 75.489    | 1.109 | 0.445 | 2.492  | 1.3E-02 | 0.03868215 | Hspb8         |
| ENSMUSG00000042492 | 5266.634  | 1.109 | 0.138 | 8.010  | 1.1E-15 | 1.5896E-14 | Tbc1d10b      |
| ENSMUSG00000031311 | 9148.206  | 1.108 | 0.091 | 12.206 | 2.9E-34 | 9.637E-33  | Nono          |
| ENSMUSG00000001131 | 7857.480  | 1.108 | 0.118 | 9.363  | 7.8E-21 | 1.4686E-19 | Timp1         |
| ENSMUSG00000056071 | 38462.304 | 1.107 | 0.270 | 4.104  | 4.1E-05 | 0.00020523 | S100a9        |
| ENSMUSG00000006127 | 3285.342  | 1.107 | 0.127 | 8.698  | 3.4E-18 | 5.5331E-17 | Inpp5k        |
| ENSMUSG00000028016 | 3360.423  | 1.107 | 0.091 | 12.153 | 5.5E-34 | 1.831E-32  | Ints12        |
| ENSMUSG00000082419 | 139.765   | 1.106 | 0.279 | 3.970  | 7.2E-05 | 0.00034976 | Gm11425       |
| ENSMUSG00000066036 | 4081.766  | 1.106 | 0.127 | 8.740  | 2.3E-18 | 3.8465E-17 | Ubr4          |
| ENSMUSG00000044199 | 654.617   | 1.105 | 0.282 | 3.920  | 8.9E-05 | 0.00042371 | S1pr4         |
| ENSMUSG00000035235 | 1130.448  | 1.102 | 0.155 | 7.120  | 1.1E-12 | 1.2142E-11 | Trim13        |
| ENSMUSG00000028800 | 3606.774  | 1.102 | 0.091 | 12.148 | 5.9E-34 | 1.9429E-32 | Hdac1         |
| ENSMUSG00000039456 | 7197.231  | 1.102 | 0.126 | 8.724  | 2.7E-18 | 4.4282E-17 | More3         |
| ENSMUSG00000085172 | 31.723    | 1.101 | 0.422 | 2.610  | 9.1E-03 | 0.02866475 | Gm6542        |
| ENSMUSG00000021877 | 26784.397 | 1.101 | 0.065 | 16.838 | 1.3E-63 | 1.0617E-61 | Arf4          |
| ENSMUSG00000031103 | 3542.074  | 1.100 | 0.113 | 9.747  | 1.9E-22 | 3.8727E-21 | Elf4          |
| ENSMUSG00000029664 | 284.617   | 1.100 | 0.449 | 2.450  | 1.4E-02 | 0.04283857 | Tfpi2         |
| ENSMUSG00000040528 | 4558.185  | 1.100 | 0.099 | 11.153 | 7.0E-29 | 1.8778E-27 | Milr1         |
| ENSMUSG00000022894 | 339.424   | 1.099 | 0.285 | 3.857  | 1.1E-04 | 0.00053834 | Adamts5       |
| ENSMUSG00000096579 | 48.712    | 1.099 | 0.374 | 2.939  | 3.3E-03 | 0.01173469 | Gm17121       |
| ENSMUSG00000052125 | 231.299   | 1.099 | 0.380 | 2.891  | 3.8E-03 | 0.01346289 | F730043M19Rik |
| ENSMUSG00000000682 | 20880.873 | 1.098 | 0.123 | 8.915  | 4.9E-19 | 8.3746E-18 | Cd52          |
| ENSMUSG00000030745 | 7801.421  | 1.098 | 0.160 | 6.877  | 6.1E-12 | 6.4661E-11 | Il21r         |
| ENSMUSG00000023993 | 1592.619  | 1.098 | 0.263 | 4.177  | 3.0E-05 | 0.00015193 | Trem11        |
| ENSMUSG00000041815 | 10405.685 | 1.097 | 0.112 | 9.813  | 9.9E-23 | 2.0638E-21 | Poldip3       |
| ENSMUSG00000051650 | 251.767   | 1.097 | 0.222 | 4.944  | 7.7E-07 | 4.8817E-06 | B3gnt2        |
| ENSMUSG00000000320 | 1935.989  | 1.097 | 0.440 | 2.491  | 1.3E-02 | 0.03870881 | Alox12        |
| ENSMUSG00000050075 | 876.065   | 1.096 | 0.199 | 5.499  | 3.8E-08 | 2.8641E-07 | Gpr171        |
| ENSMUSG00000031221 | 2571.814  | 1.095 | 0.118 | 9.241  | 2.4E-20 | 4.4922E-19 | Igbbp1        |
| ENSMUSG00000022971 | 12595.218 | 1.094 | 0.099 | 11.003 | 3.7E-28 | 9.6306E-27 | Ifnar2        |
| ENSMUSG00000086922 | 456.659   | 1.094 | 0.132 | 8.266  | 1.4E-16 | 2.0381E-15 | Gm13835       |
| ENSMUSG00000037126 | 178.060   | 1.094 | 0.368 | 2.973  | 3.0E-03 | 0.01065617 | Psd           |
| ENSMUSG00000035183 | 171.696   | 1.093 | 0.234 | 4.664  | 3.1E-06 | 1.8475E-05 | Slc24a5       |
| ENSMUSG00000040809 | 41653.571 | 1.093 | 0.168 | 6.515  | 7.3E-11 | 7.0614E-10 | Chil3         |
| ENSMUSG00000021373 | 92.411    | 1.093 | 0.429 | 2.549  | 1.1E-02 | 0.03348391 | Cap2          |
| ENSMUSG00000035399 | 1156.379  | 1.092 | 0.108 | 10.079 | 6.8E-24 | 1.498E-22  | Oser1         |
| ENSMUSG00000021039 | 7022.123  | 1.092 | 0.104 | 10.543 | 5.4E-26 | 1.2933E-24 | Snw1          |

|                    |           |       |       |        |         |            |               |
|--------------------|-----------|-------|-------|--------|---------|------------|---------------|
| ENSMUSG00000021280 | 387.763   | 1.090 | 0.189 | 5.770  | 7.9E-09 | 6.3987E-08 | Exoc314       |
| ENSMUSG00000099891 | 57.032    | 1.090 | 0.315 | 3.462  | 5.4E-04 | 0.00223646 | Gm5575        |
| ENSMUSG00000058794 | 2522.710  | 1.090 | 0.172 | 6.324  | 2.5E-10 | 2.3683E-09 | Nfe2          |
| ENSMUSG00000118519 | 51.323    | 1.089 | 0.346 | 3.150  | 1.6E-03 | 0.00621319 | Gm52992       |
| ENSMUSG00000001052 | 5554.916  | 1.088 | 0.099 | 11.039 | 2.5E-28 | 6.4744E-27 | Sec24b        |
| ENSMUSG00000040584 | 286.552   | 1.088 | 0.204 | 5.343  | 9.1E-08 | 6.5427E-07 | Abcb1a        |
| ENSMUSG00000023960 | 377.913   | 1.088 | 0.231 | 4.717  | 2.4E-06 | 1.4429E-05 | Enpp5         |
| ENSMUSG00000002233 | 14285.257 | 1.087 | 0.071 | 15.212 | 3.0E-52 | 1.74E-50   | Rhoc          |
| ENSMUSG00000019189 | 3399.228  | 1.086 | 0.132 | 8.214  | 2.1E-16 | 3.1096E-15 | Rnfl145       |
| ENSMUSG00000047669 | 510.225   | 1.085 | 0.291 | 3.732  | 1.9E-04 | 0.00086098 | Ms1312        |
| ENSMUSG00000083822 | 265.307   | 1.085 | 0.207 | 5.234  | 1.7E-07 | 1.1519E-06 | Hmgb1-ps5     |
| ENSMUSG00000020935 | 4197.339  | 1.085 | 0.092 | 11.754 | 6.7E-32 | 2.034E-30  | Deakd         |
| ENSMUSG00000002204 | 3912.347  | 1.085 | 0.114 | 9.541  | 1.4E-21 | 2.783E-20  | Napsa         |
| ENSMUSG00000040669 | 398.909   | 1.085 | 0.257 | 4.218  | 2.5E-05 | 0.00012838 | Phc1          |
| ENSMUSG00000037419 | 1493.973  | 1.085 | 0.145 | 7.491  | 6.8E-14 | 8.3994E-13 | Endod1        |
| ENSMUSG00000019969 | 8650.903  | 1.085 | 0.102 | 10.618 | 2.5E-26 | 5.9398E-25 | Psen1         |
| ENSMUSG00000021277 | 1138.900  | 1.082 | 0.149 | 7.249  | 4.2E-13 | 4.8983E-12 | Traf3         |
| ENSMUSG00000020961 | 694.781   | 1.081 | 0.199 | 5.430  | 5.6E-08 | 4.1409E-07 | Ston2         |
| ENSMUSG00000002068 | 649.564   | 1.081 | 0.154 | 7.028  | 2.1E-12 | 2.3058E-11 | Ccne1         |
| ENSMUSG00000027088 | 1984.128  | 1.080 | 0.129 | 8.356  | 6.5E-17 | 9.7731E-16 | Phospho2      |
| ENSMUSG00000022436 | 1249.245  | 1.080 | 0.122 | 8.854  | 8.4E-19 | 1.4311E-17 | Sh3bp1        |
| ENSMUSG00000058715 | 82423.464 | 1.080 | 0.098 | 11.058 | 2.0E-28 | 5.2848E-27 | Fcer1g        |
| ENSMUSG00000038848 | 6229.756  | 1.079 | 0.115 | 9.406  | 5.2E-21 | 9.8393E-20 | Ythdf1        |
| ENSMUSG00000029186 | 2588.061  | 1.079 | 0.123 | 8.765  | 1.9E-18 | 3.0951E-17 | Pi4k2b        |
| ENSMUSG00000072872 | 230.898   | 1.078 | 0.193 | 5.592  | 2.2E-08 | 1.7252E-07 | Rybp          |
| ENSMUSG00000060703 | 7191.409  | 1.078 | 0.134 | 8.035  | 9.4E-16 | 1.3038E-14 | Cd302         |
| ENSMUSG00000024335 | 17990.530 | 1.077 | 0.122 | 8.820  | 1.1E-18 | 1.9247E-17 | Brd2          |
| ENSMUSG00000059901 | 189.380   | 1.077 | 0.274 | 3.930  | 8.5E-05 | 0.00040814 | Adamts14      |
| ENSMUSG00000028099 | 3487.519  | 1.076 | 0.123 | 8.758  | 2.0E-18 | 3.3074E-17 | Polr3c        |
| ENSMUSG00000097125 | 63.437    | 1.075 | 0.330 | 3.261  | 1.1E-03 | 0.00436944 | Gm26885       |
| ENSMUSG00000042249 | 1005.226  | 1.075 | 0.171 | 6.301  | 3.0E-10 | 2.7385E-09 | Grk3          |
| ENSMUSG00000060591 | 9004.278  | 1.075 | 0.147 | 7.309  | 2.7E-13 | 3.1913E-12 | Ifitm2        |
| ENSMUSG00000024640 | 3659.421  | 1.074 | 0.110 | 9.806  | 1.1E-22 | 2.1915E-21 | Psat1         |
| ENSMUSG00000020733 | 9405.210  | 1.074 | 0.103 | 10.473 | 1.2E-25 | 2.7021E-24 | Slc9a3r1      |
| ENSMUSG00000090394 | 1594.937  | 1.073 | 0.109 | 9.835  | 8.0E-23 | 1.6699E-21 | 4930523C07Rik |
| ENSMUSG00000002658 | 8483.253  | 1.072 | 0.100 | 10.735 | 7.0E-27 | 1.7191E-25 | Gtf2fl        |
| ENSMUSG00000114835 | 586.089   | 1.072 | 0.165 | 6.487  | 8.8E-11 | 8.4408E-10 | Gm48194       |
| ENSMUSG00000032410 | 1964.611  | 1.071 | 0.118 | 9.106  | 8.5E-20 | 1.5247E-18 | Xrn1          |
| ENSMUSG00000040351 | 2466.833  | 1.070 | 0.144 | 7.457  | 8.8E-14 | 1.0783E-12 | Ankib1        |
| ENSMUSG00000028098 | 10896.752 | 1.070 | 0.090 | 11.840 | 2.4E-32 | 7.5368E-31 | Rnfl115       |
| ENSMUSG00000029428 | 3894.920  | 1.069 | 0.129 | 8.296  | 1.1E-16 | 1.6044E-15 | Stx2          |
| ENSMUSG00000036712 | 2104.413  | 1.068 | 0.149 | 7.179  | 7.0E-13 | 8.0095E-12 | Cyld          |
| ENSMUSG00000078300 | 38.583    | 1.068 | 0.408 | 2.616  | 8.9E-03 | 0.02824024 | Gm2606        |
| ENSMUSG00000016206 | 5556.166  | 1.068 | 0.123 | 8.682  | 3.9E-18 | 6.316E-17  | H2-M3         |
| ENSMUSG00000044674 | 1681.930  | 1.068 | 0.194 | 5.498  | 3.8E-08 | 2.8795E-07 | Fzd1          |
| ENSMUSG00000021814 | 12153.973 | 1.067 | 0.080 | 13.330 | 1.6E-40 | 6.4831E-39 | Anxa7         |
| ENSMUSG00000022594 | 158.074   | 1.067 | 0.323 | 3.305  | 9.5E-04 | 0.00378735 | Lynx1         |
| ENSMUSG00000026778 | 354.422   | 1.066 | 0.329 | 3.243  | 1.2E-03 | 0.00463668 | Prkcq         |
| ENSMUSG00000042423 | 1771.101  | 1.066 | 0.126 | 8.428  | 3.5E-17 | 5.3588E-16 | Fbrs          |
| ENSMUSG00000091831 | 368.365   | 1.065 | 0.183 | 5.813  | 6.1E-09 | 4.9993E-08 | Gm4707        |
| ENSMUSG00000106752 | 128.914   | 1.065 | 0.199 | 5.342  | 9.2E-08 | 6.5922E-07 | Gm3348        |
| ENSMUSG00000008348 | 6063.464  | 1.065 | 0.086 | 12.397 | 2.7E-35 | 9.2919E-34 | Ubc           |

|                    |           |       |       |        |         |            |         |
|--------------------|-----------|-------|-------|--------|---------|------------|---------|
| ENSMUSG00000049969 | 9108.440  | 1.065 | 0.102 | 10.397 | 2.6E-25 | 5.8877E-24 | Plekhf2 |
| ENSMUSG00000091955 | 2164.388  | 1.065 | 0.079 | 13.480 | 2.1E-41 | 8.8263E-40 | Gm9844  |
| ENSMUSG00000030742 | 1042.405  | 1.064 | 0.274 | 3.881  | 1.0E-04 | 0.0004928  | Lat     |
| ENSMUSG00000028709 | 2223.348  | 1.064 | 0.115 | 9.215  | 3.1E-20 | 5.6948E-19 | Mob3c   |
| ENSMUSG00000034570 | 187.422   | 1.062 | 0.369 | 2.883  | 3.9E-03 | 0.0137702  | Inpp5j  |
| ENSMUSG00000016194 | 1023.085  | 1.062 | 0.170 | 6.249  | 4.1E-10 | 3.7645E-09 | Hsd11b1 |
| ENSMUSG00000062101 | 179.005   | 1.062 | 0.355 | 2.991  | 2.8E-03 | 0.01009814 | Zfp119b |
| ENSMUSG00000032322 | 4687.358  | 1.061 | 0.136 | 7.793  | 6.6E-15 | 8.5586E-14 | Pstpip1 |
| ENSMUSG00000026399 | 319.682   | 1.061 | 0.298 | 3.554  | 3.8E-04 | 0.00163005 | Cd55    |
| ENSMUSG00000103711 | 82.846    | 1.060 | 0.376 | 2.822  | 4.8E-03 | 0.01638843 | Tstd1   |
| ENSMUSG00000015536 | 5533.016  | 1.058 | 0.125 | 8.481  | 2.2E-17 | 3.4665E-16 | Mocs2   |
| ENSMUSG00000115368 | 105.367   | 1.057 | 0.293 | 3.606  | 3.1E-04 | 0.00135549 | Gm48942 |
| ENSMUSG00000024143 | 1214.981  | 1.055 | 0.124 | 8.525  | 1.5E-17 | 2.4048E-16 | Rhoq    |
| ENSMUSG00000038127 | 5017.820  | 1.055 | 0.099 | 10.674 | 1.3E-26 | 3.2782E-25 | Ccdc50  |
| ENSMUSG00000029640 | 2799.708  | 1.055 | 0.117 | 9.003  | 2.2E-19 | 3.8561E-18 | Usp12   |
| ENSMUSG00000041992 | 277.532   | 1.054 | 0.375 | 2.808  | 5.0E-03 | 0.01703714 | Rapgef5 |
| ENSMUSG00000020038 | 1730.112  | 1.053 | 0.144 | 7.305  | 2.8E-13 | 3.2902E-12 | Cry1    |
| ENSMUSG00000022967 | 16425.460 | 1.051 | 0.111 | 9.490  | 2.3E-21 | 4.495E-20  | Ifnar1  |
| ENSMUSG00000016024 | 1005.694  | 1.051 | 0.151 | 6.963  | 3.3E-12 | 3.6034E-11 | Lbp     |
| ENSMUSG00000030231 | 305.727   | 1.051 | 0.317 | 3.318  | 9.1E-04 | 0.00362682 | Plekha5 |
| ENSMUSG00000005973 | 3544.350  | 1.051 | 0.104 | 10.136 | 3.8E-24 | 8.4973E-23 | Rcn1    |
| ENSMUSG00000055639 | 262.976   | 1.050 | 0.331 | 3.173  | 1.5E-03 | 0.00579536 | Dach1   |
| ENSMUSG00000056671 | 615.810   | 1.050 | 0.211 | 4.982  | 6.3E-07 | 4.0481E-06 | Prelid2 |
| ENSMUSG00000001281 | 2262.514  | 1.050 | 0.150 | 6.991  | 2.7E-12 | 2.9789E-11 | Itgb7   |
| ENSMUSG00000003070 | 114.032   | 1.049 | 0.439 | 2.390  | 1.7E-02 | 0.0494217  | Efna2   |
| ENSMUSG00000024983 | 2872.868  | 1.049 | 0.099 | 10.549 | 5.1E-26 | 1.2188E-24 | Vti1a   |
| ENSMUSG00000054520 | 7631.596  | 1.048 | 0.111 | 9.403  | 5.3E-21 | 1.0145E-19 | Sh3bp2  |
| ENSMUSG00000033671 | 2164.902  | 1.046 | 0.196 | 5.346  | 9.0E-08 | 6.4583E-07 | Cep350  |
| ENSMUSG00000026641 | 4023.886  | 1.045 | 0.099 | 10.547 | 5.2E-26 | 1.2449E-24 | Usf1    |
| ENSMUSG00000039264 | 168.211   | 1.045 | 0.373 | 2.798  | 5.1E-03 | 0.01753281 | Gimap3  |
| ENSMUSG00000106874 | 107.903   | 1.044 | 0.304 | 3.440  | 5.8E-04 | 0.0024135  | Gm20186 |
| ENSMUSG00000042364 | 11312.644 | 1.044 | 0.102 | 10.260 | 1.1E-24 | 2.4093E-23 | Snx18   |
| ENSMUSG00000060429 | 402.264   | 1.043 | 0.261 | 3.994  | 6.5E-05 | 0.00031862 | Sntb1   |
| ENSMUSG00000030054 | 2182.547  | 1.043 | 0.324 | 3.220  | 1.3E-03 | 0.00498446 | Gp9     |
| ENSMUSG00000003153 | 2867.315  | 1.043 | 0.214 | 4.881  | 1.1E-06 | 6.6356E-06 | Slc2a3  |
| ENSMUSG00000026495 | 235.879   | 1.042 | 0.248 | 4.200  | 2.7E-05 | 0.00013825 | Efcab2  |
| ENSMUSG00000045427 | 6337.509  | 1.042 | 0.118 | 8.841  | 9.4E-19 | 1.5964E-17 | Hnrnp2  |
| ENSMUSG00000029580 | #####     | 1.042 | 0.085 | 12.213 | 2.6E-34 | 8.8242E-33 | Actb    |
| ENSMUSG00000031799 | 33380.352 | 1.041 | 0.071 | 14.709 | 5.7E-49 | 3.025E-47  | Tpm4    |
| ENSMUSG00000103034 | 1134.103  | 1.041 | 0.112 | 9.259  | 2.1E-20 | 3.8215E-19 | Gm8797  |
| ENSMUSG00000082345 | 161.600   | 1.039 | 0.303 | 3.426  | 6.1E-04 | 0.00252199 | Gm13622 |
| ENSMUSG00000000532 | 773.445   | 1.038 | 0.232 | 4.485  | 7.3E-06 | 4.129E-05  | Acvr1b  |
| ENSMUSG00000024521 | 1978.873  | 1.038 | 0.192 | 5.404  | 6.5E-08 | 4.7579E-07 | Pmaip1  |
| ENSMUSG00000020577 | 1858.747  | 1.038 | 0.164 | 6.325  | 2.5E-10 | 2.3508E-09 | Tspan13 |
| ENSMUSG00000087298 | 91.414    | 1.037 | 0.268 | 3.865  | 1.1E-04 | 0.00052326 | Gm9392  |
| ENSMUSG00000030559 | 263.038   | 1.033 | 0.303 | 3.407  | 6.6E-04 | 0.00269455 | Rab38   |
| ENSMUSG00000024750 | 19272.955 | 1.033 | 0.078 | 13.252 | 4.4E-40 | 1.805E-38  | Zfand5  |
| ENSMUSG00000033813 | 2359.014  | 1.033 | 0.104 | 9.932  | 3.0E-23 | 6.4405E-22 | Tcea1   |
| ENSMUSG00000028937 | 4485.965  | 1.033 | 0.125 | 8.275  | 1.3E-16 | 1.8928E-15 | Acot7   |
| ENSMUSG00000018923 | 1921.355  | 1.033 | 0.129 | 7.989  | 1.4E-15 | 1.8637E-14 | Med11   |
| ENSMUSG00000097148 | 32.217    | 1.032 | 0.395 | 2.615  | 8.9E-03 | 0.02834749 | Gm3839  |
| ENSMUSG00000021114 | 12862.339 | 1.032 | 0.094 | 11.005 | 3.6E-28 | 9.4053E-27 | Atp6v1d |

|                    |           |       |       |        |         |            |               |
|--------------------|-----------|-------|-------|--------|---------|------------|---------------|
| ENSMUSG00000024896 | 3111.167  | 1.029 | 0.135 | 7.639  | 2.2E-14 | 2.787E-13  | Minpp1        |
| ENSMUSG00000113041 | 418.984   | 1.028 | 0.149 | 6.920  | 4.5E-12 | 4.8523E-11 | Gm48302       |
| ENSMUSG00000031443 | 1293.870  | 1.025 | 0.211 | 4.849  | 1.2E-06 | 7.7415E-06 | F7            |
| ENSMUSG00000025241 | 1600.210  | 1.025 | 0.156 | 6.585  | 4.6E-11 | 4.4921E-10 | Fyco1         |
| ENSMUSG00000029016 | 590.530   | 1.025 | 0.202 | 5.076  | 3.8E-07 | 2.5442E-06 | Cln6          |
| ENSMUSG00000055044 | 1189.604  | 1.024 | 0.166 | 6.172  | 6.8E-10 | 6.0501E-09 | Pdim1         |
| ENSMUSG00000087294 | 132.899   | 1.024 | 0.383 | 2.671  | 7.6E-03 | 0.02453039 | Gm13556       |
| ENSMUSG00000034401 | 1527.851  | 1.024 | 0.157 | 6.516  | 7.2E-11 | 6.9856E-10 | Spata6        |
| ENSMUSG00000024774 | 417.142   | 1.022 | 0.311 | 3.281  | 1.0E-03 | 0.00408695 | Ankrd22       |
| ENSMUSG00000114687 | 43.405    | 1.021 | 0.349 | 2.924  | 3.5E-03 | 0.01225227 | Gm5452        |
| ENSMUSG00000043740 | 16216.755 | 1.021 | 0.112 | 9.155  | 5.4E-20 | 9.8267E-19 | B430306N03Rik |
| ENSMUSG00000031242 | 951.343   | 1.021 | 0.150 | 6.805  | 1.0E-11 | 1.0459E-10 | 2610002M06Rik |
| ENSMUSG00000115505 | 45.098    | 1.020 | 0.321 | 3.173  | 1.5E-03 | 0.00578864 | Gm9247        |
| ENSMUSG00000038884 | 909.960   | 1.019 | 0.192 | 5.322  | 1.0E-07 | 7.3025E-07 | Shfl          |
| ENSMUSG00000025178 | 15149.622 | 1.019 | 0.122 | 8.352  | 6.7E-17 | 1.0117E-15 | Pi4k2a        |
| ENSMUSG00000016756 | 276.785   | 1.019 | 0.288 | 3.536  | 4.1E-04 | 0.00173536 | Cmah          |
| ENSMUSG00000026648 | 1749.133  | 1.019 | 0.187 | 5.462  | 4.7E-08 | 3.4867E-07 | Dclre1c       |
| ENSMUSG00000044712 | 838.553   | 1.019 | 0.143 | 7.126  | 1.0E-12 | 1.1625E-11 | Slc38a6       |
| ENSMUSG00000022285 | 28911.398 | 1.018 | 0.068 | 15.009 | 6.4E-51 | 3.6365E-49 | Ywhaz         |
| ENSMUSG00000032812 | 10483.685 | 1.017 | 0.104 | 9.813  | 9.9E-23 | 2.0496E-21 | Arap1         |
| ENSMUSG00000032479 | 6156.650  | 1.016 | 0.127 | 7.995  | 1.3E-15 | 1.7824E-14 | Map4          |
| ENSMUSG00000067869 | 260.806   | 1.016 | 0.184 | 5.533  | 3.2E-08 | 2.3843E-07 | Tcea1-ps1     |
| ENSMUSG00000032180 | 2970.396  | 1.015 | 0.073 | 13.883 | 8.0E-44 | 3.6597E-42 | Tmed1         |
| ENSMUSG00000102059 | 118.433   | 1.015 | 0.318 | 3.194  | 1.4E-03 | 0.00541894 | Gm20257       |
| ENSMUSG00000049719 | 158.178   | 1.015 | 0.386 | 2.633  | 8.5E-03 | 0.02708334 | Prss46        |
| ENSMUSG00000019920 | 15672.501 | 1.015 | 0.076 | 13.385 | 7.4E-41 | 3.1362E-39 | Lims1         |
| ENSMUSG00000030589 | 567.443   | 1.015 | 0.210 | 4.840  | 1.3E-06 | 8.0514E-06 | Rasgrp4       |
| ENSMUSG00000022504 | 273.928   | 1.014 | 0.410 | 2.474  | 1.3E-02 | 0.04035678 | Ciita         |
| ENSMUSG00000106190 | 41.673    | 1.013 | 0.379 | 2.672  | 7.5E-03 | 0.02444986 | Gm20768       |
| ENSMUSG00000104795 | 101.260   | 1.012 | 0.346 | 2.927  | 3.4E-03 | 0.0121623  | Gm42783       |
| ENSMUSG00000046556 | 2326.842  | 1.012 | 0.142 | 7.151  | 8.6E-13 | 9.7499E-12 | Zfp319        |
| ENSMUSG00000043889 | 150.750   | 1.010 | 0.231 | 4.367  | 1.3E-05 | 6.8844E-05 | Gm8399        |
| ENSMUSG00000028977 | 708.333   | 1.008 | 0.236 | 4.268  | 2.0E-05 | 0.00010447 | Casz1         |
| ENSMUSG00000002250 | 227.020   | 1.008 | 0.283 | 3.558  | 3.7E-04 | 0.00160321 | Ppard         |
| ENSMUSG00000107136 | 128.247   | 1.008 | 0.346 | 2.910  | 3.6E-03 | 0.0127343  | Gm42466       |
| ENSMUSG00000031879 | 3524.546  | 1.008 | 0.118 | 8.565  | 1.1E-17 | 1.7142E-16 | Ciao2b        |
| ENSMUSG00000037418 | 268.630   | 1.007 | 0.293 | 3.434  | 5.9E-04 | 0.00245454 | Best1         |
| ENSMUSG00000059920 | 1965.219  | 1.007 | 0.128 | 7.866  | 3.7E-15 | 4.9064E-14 | 4930453N24Rik |
| ENSMUSG00000089988 | 120.177   | 1.007 | 0.290 | 3.477  | 5.1E-04 | 0.00212416 | Gm16238       |
| ENSMUSG00000044068 | 105.742   | 1.006 | 0.376 | 2.680  | 7.4E-03 | 0.02397335 | Zrsr1         |
| ENSMUSG00000001924 | 11901.362 | 1.006 | 0.082 | 12.279 | 1.2E-34 | 3.9692E-33 | Ubal          |
| ENSMUSG00000060671 | 309.630   | 1.006 | 0.225 | 4.478  | 7.5E-06 | 4.2588E-05 | Atp8b2        |
| ENSMUSG00000067851 | 2048.912  | 1.005 | 0.134 | 7.512  | 5.8E-14 | 7.2208E-13 | Arfgef1       |
| ENSMUSG00000074506 | 189.297   | 1.004 | 0.218 | 4.614  | 3.9E-06 | 2.3134E-05 | Gm10705       |
| ENSMUSG00000001930 | 783.436   | 1.004 | 0.264 | 3.808  | 1.4E-04 | 0.00064954 | Vwf           |
| ENSMUSG00000007036 | 7082.407  | 1.003 | 0.102 | 9.830  | 8.4E-23 | 1.75E-21   | Abhd16a       |
| ENSMUSG00000014813 | 123.608   | 1.002 | 0.379 | 2.648  | 8.1E-03 | 0.02600271 | Stc1          |
| ENSMUSG00000107225 | 99.247    | 1.001 | 0.356 | 2.809  | 5.0E-03 | 0.01697793 | Gm43637       |
| ENSMUSG00000041324 | 9890.028  | 0.999 | 0.160 | 6.253  | 4.0E-10 | 3.6756E-09 | Inhba         |
| ENSMUSG00000027429 | 8679.710  | 0.998 | 0.105 | 9.475  | 2.7E-21 | 5.1985E-20 | Sec23b        |
| ENSMUSG00000054641 | 956.066   | 0.997 | 0.187 | 5.326  | 1.0E-07 | 7.1678E-07 | Mmrn1         |
| ENSMUSG00000018378 | 365.393   | 0.997 | 0.256 | 3.900  | 9.6E-05 | 0.00045661 | Cuedc1        |

|                    |            |       |       |        |         |            |            |
|--------------------|------------|-------|-------|--------|---------|------------|------------|
| ENSMUSG00000021123 | 308.588    | 0.997 | 0.303 | 3.292  | 9.9E-04 | 0.00394175 | Rdh12      |
| ENSMUSG00000013787 | 2507.714   | 0.995 | 0.107 | 9.275  | 1.8E-20 | 3.309E-19  | Ehmt2      |
| ENSMUSG00000060450 | 4950.563   | 0.995 | 0.097 | 10.214 | 1.7E-24 | 3.8713E-23 | Rnfl4      |
| ENSMUSG00000045319 | 409.954    | 0.993 | 0.377 | 2.633  | 8.5E-03 | 0.02703355 | Proser2    |
| ENSMUSG00000073274 | 2616.478   | 0.993 | 0.150 | 6.638  | 3.2E-11 | 3.1668E-10 | Gm14636    |
| ENSMUSG00000095159 | 53.026     | 0.992 | 0.331 | 2.998  | 2.7E-03 | 0.00989313 | Tubb4b-ps1 |
| ENSMUSG00000043832 | 6255.771   | 0.992 | 0.119 | 8.332  | 8.0E-17 | 1.1952E-15 | Clec4a3    |
| ENSMUSG00000118668 | 4616.451   | 0.991 | 0.115 | 8.642  | 5.5E-18 | 8.8944E-17 | AC120557.1 |
| ENSMUSG00000023106 | 5543.773   | 0.991 | 0.076 | 13.110 | 2.9E-39 | 1.1585E-37 | Denr       |
| ENSMUSG00000025058 | 2015.823   | 0.991 | 0.161 | 6.136  | 8.5E-10 | 7.5114E-09 | Tasl       |
| ENSMUSG00000103772 | 145.564    | 0.990 | 0.388 | 2.551  | 1.1E-02 | 0.03329196 | Gm36933    |
| ENSMUSG00000071477 | 492.718    | 0.990 | 0.195 | 5.082  | 3.7E-07 | 2.4769E-06 | Zfp777     |
| ENSMUSG00000099444 | 36.936     | 0.990 | 0.401 | 2.469  | 1.4E-02 | 0.0408175  | Gm29240    |
| ENSMUSG00000033159 | 11407.933  | 0.990 | 0.105 | 9.397  | 5.6E-21 | 1.0685E-19 | Cnppd1     |
| ENSMUSG00000024019 | 95.557     | 0.990 | 0.335 | 2.958  | 3.1E-03 | 0.01112104 | Cmtr1      |
| ENSMUSG00000026197 | 2321.680   | 0.989 | 0.111 | 8.898  | 5.7E-19 | 9.724E-18  | Zfand2b    |
| ENSMUSG00000022146 | 1225.344   | 0.988 | 0.166 | 5.959  | 2.5E-09 | 2.1458E-08 | Osmr       |
| ENSMUSG00000023345 | 635.302    | 0.988 | 0.173 | 5.702  | 1.2E-08 | 9.3541E-08 | Poc1a      |
| ENSMUSG00000046610 | 254.183    | 0.988 | 0.366 | 2.699  | 7.0E-03 | 0.02279782 | Oacyl      |
| ENSMUSG00000084348 | 34.626     | 0.988 | 0.412 | 2.399  | 1.6E-02 | 0.04841027 | Gm14608    |
| ENSMUSG00000098188 | 2884.913   | 0.987 | 0.109 | 9.079  | 1.1E-19 | 1.9519E-18 | Sowahc     |
| ENSMUSG00000022369 | 267.592    | 0.987 | 0.254 | 3.882  | 1.0E-04 | 0.00048999 | Mtbp       |
| ENSMUSG00000092035 | 104.167    | 0.987 | 0.357 | 2.766  | 5.7E-03 | 0.01906022 | Peg10      |
| ENSMUSG00000018425 | 1370.293   | 0.985 | 0.161 | 6.104  | 1.0E-09 | 9.077E-09  | Dhx40      |
| ENSMUSG00000033799 | 845.098    | 0.985 | 0.196 | 5.015  | 5.3E-07 | 3.4399E-06 | Tasor2     |
| ENSMUSG00000091586 | 305.146    | 0.985 | 0.271 | 3.634  | 2.8E-04 | 0.00122965 | Cyp4fl7    |
| ENSMUSG00000000628 | 6610.490   | 0.984 | 0.114 | 8.622  | 6.6E-18 | 1.0549E-16 | Hk2        |
| ENSMUSG00000078851 | 733.385    | 0.984 | 0.158 | 6.227  | 4.7E-10 | 4.2851E-09 | H2aw       |
| ENSMUSG00000116927 | 77.959     | 0.984 | 0.409 | 2.404  | 1.6E-02 | 0.04785107 | Gm30881    |
| ENSMUSG00000087203 | 171.365    | 0.983 | 0.266 | 3.700  | 2.2E-04 | 0.00096781 | Gm13986    |
| ENSMUSG00000108633 | 80.168     | 0.983 | 0.278 | 3.539  | 4.0E-04 | 0.00171612 | Gm44694    |
| ENSMUSG00000044258 | 935.936    | 0.983 | 0.265 | 3.712  | 2.1E-04 | 0.00092764 | Ctla2a     |
| ENSMUSG00000056054 | 126929.825 | 0.982 | 0.261 | 3.759  | 1.7E-04 | 0.00078037 | S100a8     |
| ENSMUSG00000089929 | 1622.873   | 0.982 | 0.098 | 10.072 | 7.3E-24 | 1.6013E-22 | Bcl2a1b    |
| ENSMUSG00000020882 | 136.539    | 0.982 | 0.362 | 2.713  | 6.7E-03 | 0.02200473 | Caenb1     |
| ENSMUSG00000073982 | 27386.983  | 0.981 | 0.083 | 11.881 | 1.5E-32 | 4.681E-31  | Rhog       |
| ENSMUSG00000017837 | 7619.517   | 0.980 | 0.104 | 9.442  | 3.7E-21 | 7.0558E-20 | Nkiras2    |
| ENSMUSG00000026980 | 696.232    | 0.979 | 0.189 | 5.176  | 2.3E-07 | 1.5493E-06 | Ly75       |
| ENSMUSG00000024043 | 255.435    | 0.979 | 0.398 | 2.461  | 1.4E-02 | 0.04168316 | Arhgap28   |
| ENSMUSG00000040414 | 2052.700   | 0.978 | 0.171 | 5.727  | 1.0E-08 | 8.1264E-08 | Slc25a28   |
| ENSMUSG00000111684 | 52.492     | 0.977 | 0.354 | 2.764  | 5.7E-03 | 0.01915824 | Gm8543     |
| ENSMUSG00000002996 | 3276.829   | 0.977 | 0.128 | 7.625  | 2.4E-14 | 3.0956E-13 | Hbp1       |
| ENSMUSG00000024910 | 108.346    | 0.976 | 0.389 | 2.509  | 1.2E-02 | 0.03701195 | Ctsw       |
| ENSMUSG00000063889 | 1429.945   | 0.976 | 0.215 | 4.532  | 5.8E-06 | 3.3367E-05 | Crem       |
| ENSMUSG00000024833 | 1158.068   | 0.976 | 0.141 | 6.922  | 4.5E-12 | 4.7894E-11 | Pola2      |
| ENSMUSG00000040675 | 922.436    | 0.974 | 0.191 | 5.095  | 3.5E-07 | 2.3282E-06 | Mthfd11    |
| ENSMUSG00000078151 | 42.589     | 0.974 | 0.355 | 2.739  | 6.2E-03 | 0.02051073 | Gm12226    |
| ENSMUSG00000071203 | 765.847    | 0.974 | 0.205 | 4.756  | 2.0E-06 | 1.2012E-05 | Naip5      |
| ENSMUSG00000036099 | 1993.652   | 0.973 | 0.136 | 7.181  | 6.9E-13 | 7.9296E-12 | Vezt       |
| ENSMUSG00000021962 | 1621.662   | 0.973 | 0.175 | 5.549  | 2.9E-08 | 2.1816E-07 | Dcpl1a     |
| ENSMUSG00000039831 | 244.396    | 0.972 | 0.331 | 2.934  | 3.3E-03 | 0.01189403 | Arhgap29   |
| ENSMUSG00000018819 | 6935.584   | 0.972 | 0.138 | 7.030  | 2.1E-12 | 2.2832E-11 | Lsp1       |

|                     |           |       |       |        |         |            |          |
|---------------------|-----------|-------|-------|--------|---------|------------|----------|
| ENSMUSG0000000976   | 2897.922  | 0.972 | 0.110 | 8.858  | 8.1E-19 | 1.3822E-17 | Heatr6   |
| ENSMUSG00000042167  | 5004.058  | 0.970 | 0.100 | 9.710  | 2.7E-22 | 5.5488E-21 | Tent2    |
| ENSMUSG00000015950  | 10095.027 | 0.970 | 0.097 | 10.029 | 1.1E-23 | 2.4802E-22 | Ncf1     |
| ENSMUSG00000026637  | 887.401   | 0.969 | 0.201 | 4.808  | 1.5E-06 | 9.3728E-06 | Traf5    |
| ENSMUSG000000115002 | 232.475   | 0.968 | 0.233 | 4.156  | 3.2E-05 | 0.0001656  | Gm10847  |
| ENSMUSG00000002844  | 14983.698 | 0.968 | 0.080 | 12.153 | 5.5E-34 | 1.8226E-32 | Adprh    |
| ENSMUSG00000036398  | 4462.410  | 0.967 | 0.078 | 12.435 | 1.7E-35 | 5.8718E-34 | Ppp1r11  |
| ENSMUSG00000038059  | 6106.428  | 0.966 | 0.133 | 7.260  | 3.9E-13 | 4.517E-12  | Smim3    |
| ENSMUSG00000048787  | 1356.211  | 0.966 | 0.135 | 7.183  | 6.8E-13 | 7.8301E-12 | Dcun1d3  |
| ENSMUSG00000024277  | 5917.293  | 0.965 | 0.124 | 7.771  | 7.8E-15 | 1.0153E-13 | Mapre2   |
| ENSMUSG00000078485  | 2453.467  | 0.965 | 0.178 | 5.429  | 5.7E-08 | 4.1644E-07 | Plekhn1  |
| ENSMUSG00000001739  | 552.289   | 0.964 | 0.210 | 4.587  | 4.5E-06 | 2.6166E-05 | Cldn15   |
| ENSMUSG00000073643  | 1308.765  | 0.964 | 0.138 | 6.997  | 2.6E-12 | 2.8655E-11 | Wdfy1    |
| ENSMUSG00000084104  | 45.187    | 0.963 | 0.397 | 2.425  | 1.5E-02 | 0.04555448 | Gm13578  |
| ENSMUSG00000024835  | 20399.118 | 0.962 | 0.069 | 13.889 | 7.4E-44 | 3.3943E-42 | Coro1b   |
| ENSMUSG00000054604  | 9658.703  | 0.962 | 0.102 | 9.426  | 4.3E-21 | 8.156E-20  | Cggbp1   |
| ENSMUSG00000004371  | 490.565   | 0.962 | 0.322 | 2.985  | 2.8E-03 | 0.01027398 | Il11     |
| ENSMUSG00000050967  | 145.900   | 0.961 | 0.327 | 2.934  | 3.3E-03 | 0.01190704 | Creg2    |
| ENSMUSG00000039981  | 1736.863  | 0.961 | 0.208 | 4.618  | 3.9E-06 | 2.2751E-05 | Zc3h12d  |
| ENSMUSG00000022122  | 10069.959 | 0.960 | 0.141 | 6.800  | 1.0E-11 | 1.0818E-10 | Ednrb    |
| ENSMUSG00000019916  | 11612.973 | 0.960 | 0.091 | 10.579 | 3.7E-26 | 8.9067E-25 | P4ha1    |
| ENSMUSG00000026219  | 3267.992  | 0.960 | 0.106 | 9.056  | 1.4E-19 | 2.401E-18  | Trip12   |
| ENSMUSG00000029414  | 125.410   | 0.959 | 0.370 | 2.590  | 9.6E-03 | 0.03015891 | Kntc1    |
| ENSMUSG00000021686  | 7027.672  | 0.958 | 0.118 | 8.098  | 5.6E-16 | 7.8759E-15 | Ap3b1    |
| ENSMUSG00000094392  | 129.542   | 0.958 | 0.230 | 4.166  | 3.1E-05 | 0.00015856 | Gm3788   |
| ENSMUSG00000001065  | 1648.628  | 0.958 | 0.134 | 7.138  | 9.4E-13 | 1.0644E-11 | Zfp276   |
| ENSMUSG00000051457  | 326.693   | 0.957 | 0.198 | 4.836  | 1.3E-06 | 8.2357E-06 | Spn      |
| ENSMUSG00000003410  | 32.621    | 0.956 | 0.384 | 2.488  | 1.3E-02 | 0.03897301 | Elavl3   |
| ENSMUSG00000046101  | 156.262   | 0.955 | 0.243 | 3.925  | 8.7E-05 | 0.00041668 | Mcmcdc2  |
| ENSMUSG00000015668  | 3146.041  | 0.953 | 0.086 | 11.059 | 2.0E-28 | 5.2746E-27 | Pdzd11   |
| ENSMUSG00000064208  | 141.481   | 0.953 | 0.217 | 4.396  | 1.1E-05 | 6.0578E-05 | Gm10145  |
| ENSMUSG00000016534  | 33663.897 | 0.952 | 0.115 | 8.309  | 9.7E-17 | 1.439E-15  | Lamp2    |
| ENSMUSG00000011114  | 4121.818  | 0.952 | 0.095 | 9.982  | 1.8E-23 | 3.9494E-22 | Tbrg1    |
| ENSMUSG00000079414  | 164.868   | 0.950 | 0.269 | 3.536  | 4.1E-04 | 0.00173421 | Gm11110  |
| ENSMUSG00000063659  | 267.075   | 0.950 | 0.223 | 4.253  | 2.1E-05 | 0.000111   | Zbtb18   |
| ENSMUSG00000033910  | 346.045   | 0.949 | 0.265 | 3.577  | 3.5E-04 | 0.00150347 | Gucy1a1  |
| ENSMUSG00000018707  | 3276.087  | 0.949 | 0.112 | 8.471  | 2.4E-17 | 3.7617E-16 | Dync1h1  |
| ENSMUSG00000022744  | 5295.967  | 0.948 | 0.102 | 9.329  | 1.1E-20 | 2.004E-19  | Clndn1   |
| ENSMUSG00000061950  | 2853.438  | 0.947 | 0.159 | 5.974  | 2.3E-09 | 1.9664E-08 | Ppp4r1   |
| ENSMUSG00000065422  | 61.937    | 0.947 | 0.365 | 2.598  | 9.4E-03 | 0.02955095 | Mir221   |
| ENSMUSG00000014226  | 9620.928  | 0.947 | 0.058 | 16.444 | 9.2E-61 | 6.9695E-59 | Cacybp   |
| ENSMUSG00000026819  | 1494.944  | 0.946 | 0.141 | 6.696  | 2.1E-11 | 2.163E-10  | Slc25a25 |
| ENSMUSG00000008200  | 4245.122  | 0.946 | 0.112 | 8.468  | 2.5E-17 | 3.8632E-16 | Fnbp4    |
| ENSMUSG000000114540 | 69.404    | 0.945 | 0.311 | 3.040  | 2.4E-03 | 0.00871797 | Gm6421   |
| ENSMUSG00000023944  | 62291.596 | 0.945 | 0.068 | 13.991 | 1.8E-44 | 8.2701E-43 | Hsp90ab1 |
| ENSMUSG00000034135  | 1924.019  | 0.943 | 0.228 | 4.140  | 3.5E-05 | 0.00017636 | Sik3     |
| ENSMUSG00000096054  | 1070.700  | 0.943 | 0.261 | 3.615  | 3.0E-04 | 0.00131513 | Syne1    |
| ENSMUSG00000024927  | 13089.431 | 0.943 | 0.079 | 11.940 | 7.3E-33 | 2.3301E-31 | Rela     |
| ENSMUSG00000029229  | 8406.020  | 0.942 | 0.092 | 10.207 | 1.8E-24 | 4.1422E-23 | Chic2    |
| ENSMUSG00000022479  | 425.351   | 0.942 | 0.282 | 3.338  | 8.4E-04 | 0.00338788 | Vdr      |
| ENSMUSG00000028300  | 5940.541  | 0.942 | 0.108 | 8.717  | 2.9E-18 | 4.6944E-17 | C9orf72  |
| ENSMUSG00000024349  | 2966.468  | 0.941 | 0.171 | 5.493  | 3.9E-08 | 2.9551E-07 | Sting1   |



|                    |           |       |       |        |         |            |               |
|--------------------|-----------|-------|-------|--------|---------|------------|---------------|
| ENSMUSG00000027778 | 135.715   | 0.938 | 0.343 | 2.732  | 6.3E-03 | 0.02091642 | Ift80         |
| ENSMUSG00000094257 | 137.102   | 0.937 | 0.228 | 4.113  | 3.9E-05 | 0.00019752 | Ap3s1-ps2     |
| ENSMUSG00000058587 | 10360.542 | 0.936 | 0.103 | 9.113  | 8.0E-20 | 1.4336E-18 | Tmod3         |
| ENSMUSG00000000441 | 3466.532  | 0.935 | 0.110 | 8.493  | 2.0E-17 | 3.1279E-16 | Raf1          |
| ENSMUSG00000069662 | 32119.566 | 0.935 | 0.180 | 5.199  | 2.0E-07 | 1.3728E-06 | Marcks        |
| ENSMUSG00000021624 | 4382.822  | 0.934 | 0.174 | 5.371  | 7.8E-08 | 5.6617E-07 | Cd180         |
| ENSMUSG00000046962 | 1515.997  | 0.934 | 0.114 | 8.168  | 3.1E-16 | 4.5137E-15 | Zbtb21        |
| ENSMUSG00000027333 | 10137.071 | 0.934 | 0.121 | 7.684  | 1.5E-14 | 1.9655E-13 | Smox          |
| ENSMUSG00000036180 | 8291.003  | 0.933 | 0.131 | 7.126  | 1.0E-12 | 1.1608E-11 | Gatad2a       |
| ENSMUSG00000067365 | 2409.885  | 0.933 | 0.099 | 9.452  | 3.3E-21 | 6.4276E-20 | Tmem128       |
| ENSMUSG00000038384 | 1692.220  | 0.932 | 0.114 | 8.211  | 2.2E-16 | 3.1953E-15 | Setd1b        |
| ENSMUSG00000029994 | 21237.840 | 0.932 | 0.074 | 12.595 | 2.2E-36 | 8.0958E-35 | Anxa4         |
| ENSMUSG00000002812 | 9977.183  | 0.932 | 0.099 | 9.447  | 3.5E-21 | 6.7344E-20 | Flii          |
| ENSMUSG00000082431 | 66.166    | 0.931 | 0.356 | 2.616  | 8.9E-03 | 0.02825312 | Prdx2-ps1     |
| ENSMUSG00000023272 | 5445.813  | 0.931 | 0.097 | 9.643  | 5.3E-22 | 1.0576E-20 | Creld2        |
| ENSMUSG00000044583 | 3239.055  | 0.931 | 0.140 | 6.639  | 3.2E-11 | 3.1574E-10 | Tlr7          |
| ENSMUSG00000093402 | 80.541    | 0.931 | 0.275 | 3.380  | 7.2E-04 | 0.00294346 | Gm18588       |
| ENSMUSG00000027367 | 4312.689  | 0.930 | 0.116 | 7.986  | 1.4E-15 | 1.9129E-14 | Stard7        |
| ENSMUSG00000044906 | 908.155   | 0.930 | 0.182 | 5.116  | 3.1E-07 | 2.0931E-06 | 4930503L19Rik |
| ENSMUSG00000033450 | 4892.453  | 0.929 | 0.093 | 9.949  | 2.5E-23 | 5.4353E-22 | Tagap         |
| ENSMUSG00000060657 | 3600.945  | 0.929 | 0.109 | 8.499  | 1.9E-17 | 2.9818E-16 | Marf1         |
| ENSMUSG00000022026 | 1752.186  | 0.929 | 0.241 | 3.859  | 1.1E-04 | 0.0005363  | Olfm4         |
| ENSMUSG00000056121 | 8753.219  | 0.928 | 0.104 | 8.936  | 4.0E-19 | 6.9507E-18 | Fez2          |
| ENSMUSG00000026269 | 7307.712  | 0.928 | 0.123 | 7.574  | 3.6E-14 | 4.5289E-13 | Rnpep11       |
| ENSMUSG00000034612 | 703.273   | 0.928 | 0.152 | 6.104  | 1.0E-09 | 9.1152E-09 | Chst11        |
| ENSMUSG00000031162 | 554.818   | 0.927 | 0.297 | 3.121  | 1.8E-03 | 0.00679677 | Gata1         |
| ENSMUSG00000024429 | 3128.935  | 0.927 | 0.126 | 7.348  | 2.0E-13 | 2.4142E-12 | Gnl1          |
| ENSMUSG00000039191 | 3073.327  | 0.927 | 0.133 | 6.941  | 3.9E-12 | 4.2066E-11 | Rbpj          |
| ENSMUSG00000059714 | 5869.385  | 0.925 | 0.095 | 9.691  | 3.3E-22 | 6.6488E-21 | Flot1         |
| ENSMUSG00000104030 | 470.261   | 0.925 | 0.263 | 3.521  | 4.3E-04 | 0.00182377 | 5330406M23Rik |
| ENSMUSG00000054509 | 1468.764  | 0.924 | 0.140 | 6.624  | 3.5E-11 | 3.4795E-10 | Parp4         |
| ENSMUSG00000032301 | 4689.578  | 0.924 | 0.092 | 10.021 | 1.2E-23 | 2.662E-22  | Psma4         |
| ENSMUSG00000064193 | 101.334   | 0.923 | 0.303 | 3.043  | 2.3E-03 | 0.0086262  | Gm4735        |
| ENSMUSG00000030469 | 488.791   | 0.923 | 0.229 | 4.034  | 5.5E-05 | 0.00027224 | Zfp719        |
| ENSMUSG00000035021 | 3307.391  | 0.923 | 0.123 | 7.486  | 7.1E-14 | 8.7153E-13 | Baz1a         |
| ENSMUSG00000024251 | 537.669   | 0.923 | 0.183 | 5.048  | 4.5E-07 | 2.9221E-06 | Thada         |
| ENSMUSG00000030516 | 149.094   | 0.922 | 0.318 | 2.897  | 3.8E-03 | 0.01325263 | Tjp1          |
| ENSMUSG00000004730 | 47329.426 | 0.921 | 0.139 | 6.644  | 3.1E-11 | 3.0519E-10 | Adgre1        |
| ENSMUSG00000027422 | 13498.967 | 0.921 | 0.081 | 11.403 | 4.1E-30 | 1.1492E-28 | Rrbp1         |
| ENSMUSG00000031959 | 699.546   | 0.920 | 0.233 | 3.942  | 8.1E-05 | 0.00038902 | Wdr59         |
| ENSMUSG00000037972 | 959.021   | 0.919 | 0.225 | 4.090  | 4.3E-05 | 0.00021687 | Snn           |
| ENSMUSG00000020440 | 23226.796 | 0.919 | 0.071 | 12.965 | 1.9E-38 | 7.4694E-37 | Arf5          |
| ENSMUSG00000027660 | 10594.235 | 0.919 | 0.091 | 10.074 | 7.2E-24 | 1.5752E-22 | Skil          |
| ENSMUSG00000018347 | 1393.193  | 0.919 | 0.142 | 6.482  | 9.0E-11 | 8.6985E-10 | Zkscan6       |
| ENSMUSG00000003123 | 1399.958  | 0.919 | 0.123 | 7.447  | 9.5E-14 | 1.1606E-12 | Lipe          |
| ENSMUSG00000060862 | 385.351   | 0.918 | 0.230 | 3.991  | 6.6E-05 | 0.00032163 | Zbtb40        |
| ENSMUSG00000026425 | 5841.462  | 0.918 | 0.139 | 6.611  | 3.8E-11 | 3.7748E-10 | Srgap2        |
| ENSMUSG00000042419 | 468.416   | 0.917 | 0.179 | 5.125  | 3.0E-07 | 2.0023E-06 | Nfkbil1       |
| ENSMUSG00000048170 | 11497.042 | 0.917 | 0.094 | 9.804  | 1.1E-22 | 2.2454E-21 | Mcmbp         |
| ENSMUSG00000030766 | 4309.615  | 0.917 | 0.117 | 7.845  | 4.3E-15 | 5.7459E-14 | Arhgap17      |
| ENSMUSG00000058126 | 446.837   | 0.916 | 0.157 | 5.815  | 6.1E-09 | 4.9694E-08 | Tpm3-rs7      |
| ENSMUSG00000025521 | 3637.017  | 0.916 | 0.109 | 8.384  | 5.1E-17 | 7.7825E-16 | Tmem192       |

|                    |           |       |       |        |         |            |               |
|--------------------|-----------|-------|-------|--------|---------|------------|---------------|
| ENSMUSG00000094870 | 2526.022  | 0.915 | 0.132 | 6.929  | 4.2E-12 | 4.5622E-11 | Zfp131        |
| ENSMUSG00000042396 | 8525.014  | 0.914 | 0.093 | 9.824  | 8.9E-23 | 1.8439E-21 | Rbm7          |
| ENSMUSG00000004661 | 985.000   | 0.913 | 0.164 | 5.571  | 2.5E-08 | 1.9326E-07 | Arid3b        |
| ENSMUSG00000096960 | 87.210    | 0.912 | 0.377 | 2.419  | 1.6E-02 | 0.04618471 | A230028O05Rik |
| ENSMUSG00000021843 | 2979.716  | 0.911 | 0.113 | 8.074  | 6.8E-16 | 9.5831E-15 | Ktn1          |
| ENSMUSG00000025019 | 1072.955  | 0.911 | 0.140 | 6.493  | 8.4E-11 | 8.1255E-10 | Lcor          |
| ENSMUSG00000058318 | 1047.878  | 0.911 | 0.156 | 5.837  | 5.3E-09 | 4.3789E-08 | Phf21a        |
| ENSMUSG00000025287 | 4779.409  | 0.911 | 0.087 | 10.461 | 1.3E-25 | 3.0537E-24 | Acot9         |
| ENSMUSG00000006403 | 801.306   | 0.911 | 0.252 | 3.617  | 3.0E-04 | 0.00130699 | Adamts4       |
| ENSMUSG00000025792 | 2892.127  | 0.910 | 0.089 | 10.237 | 1.4E-24 | 3.0684E-23 | Slc25a10      |
| ENSMUSG00000025647 | 53261.353 | 0.910 | 0.108 | 8.442  | 3.1E-17 | 4.805E-16  | Shisa5        |
| ENSMUSG00000026626 | 5342.500  | 0.909 | 0.141 | 6.461  | 1.0E-10 | 9.9474E-10 | Ppp2r5a       |
| ENSMUSG00000027680 | 1956.280  | 0.909 | 0.100 | 9.130  | 6.9E-20 | 1.2352E-18 | Fxr1          |
| ENSMUSG00000070315 | 132.288   | 0.908 | 0.294 | 3.091  | 2.0E-03 | 0.00745667 | 4930581F22Rik |
| ENSMUSG00000030019 | 755.442   | 0.908 | 0.188 | 4.834  | 1.3E-06 | 8.3009E-06 | Fbx114        |
| ENSMUSG00000090019 | 160.100   | 0.908 | 0.328 | 2.767  | 5.6E-03 | 0.01899706 | Gimap1        |
| ENSMUSG00000022765 | 1746.820  | 0.907 | 0.116 | 7.844  | 4.4E-15 | 5.784E-14  | Snap29        |
| ENSMUSG00000035274 | 874.532   | 0.906 | 0.176 | 5.139  | 2.8E-07 | 1.8651E-06 | Tpbg          |
| ENSMUSG00000031997 | 395.604   | 0.906 | 0.304 | 2.986  | 2.8E-03 | 0.01024897 | Trpc6         |
| ENSMUSG00000038312 | 6864.761  | 0.906 | 0.070 | 12.872 | 6.5E-38 | 2.4817E-36 | Edem2         |
| ENSMUSG00000020181 | 176.830   | 0.905 | 0.356 | 2.540  | 1.1E-02 | 0.03425277 | Nav3          |
| ENSMUSG00000026311 | 368.185   | 0.905 | 0.246 | 3.688  | 2.3E-04 | 0.00101188 | Asb1          |
| ENSMUSG00000069539 | 827.053   | 0.905 | 0.197 | 4.587  | 4.5E-06 | 2.6166E-05 | Scyl2         |
| ENSMUSG00000031536 | 2757.250  | 0.905 | 0.091 | 9.978  | 1.9E-23 | 4.0871E-22 | Polb          |
| ENSMUSG00000021143 | 2214.351  | 0.904 | 0.129 | 6.988  | 2.8E-12 | 3.0427E-11 | Pacs2         |
| ENSMUSG00000009633 | 872.637   | 0.904 | 0.285 | 3.172  | 1.5E-03 | 0.00580165 | G0s2          |
| ENSMUSG00000027475 | 757.308   | 0.903 | 0.165 | 5.458  | 4.8E-08 | 3.5594E-07 | Kif3b         |
| ENSMUSG00000026271 | 1680.441  | 0.903 | 0.169 | 5.350  | 8.8E-08 | 6.3352E-07 | Gpr35         |
| ENSMUSG00000026087 | 5228.253  | 0.903 | 0.096 | 9.433  | 4.0E-21 | 7.6246E-20 | Mrpl30        |
| ENSMUSG00000029249 | 6378.327  | 0.902 | 0.078 | 11.622 | 3.2E-31 | 9.392E-30  | Rest          |
| ENSMUSG00000082016 | 54.591    | 0.902 | 0.304 | 2.969  | 3.0E-03 | 0.01075962 | Pgam1-ps2     |
| ENSMUSG00000004668 | 238.003   | 0.902 | 0.348 | 2.595  | 9.5E-03 | 0.02974695 | Abca13        |
| ENSMUSG00000027881 | 3675.796  | 0.902 | 0.103 | 8.798  | 1.4E-18 | 2.3209E-17 | Prpf38b       |
| ENSMUSG00000063568 | 130.477   | 0.901 | 0.332 | 2.715  | 6.6E-03 | 0.02187019 | Jazf1         |
| ENSMUSG00000052144 | 1667.342  | 0.900 | 0.120 | 7.481  | 7.4E-14 | 9.0552E-13 | Ppp4r2        |
| ENSMUSG00000022488 | 16570.896 | 0.900 | 0.151 | 5.972  | 2.3E-09 | 1.9866E-08 | Nckap11       |
| ENSMUSG00000043059 | 2354.029  | 0.900 | 0.115 | 7.802  | 6.1E-15 | 7.9834E-14 | Zfp513        |
| ENSMUSG00000029771 | 30983.115 | 0.900 | 0.106 | 8.515  | 1.7E-17 | 2.6086E-16 | Irf5          |
| ENSMUSG00000047953 | 2129.038  | 0.899 | 0.243 | 3.700  | 2.2E-04 | 0.00096702 | Gp5           |
| ENSMUSG00000109706 | 273.714   | 0.899 | 0.150 | 6.012  | 1.8E-09 | 1.5775E-08 | Fth-ps3       |
| ENSMUSG00000055204 | 3758.401  | 0.899 | 0.139 | 6.463  | 1.0E-10 | 9.8289E-10 | Ankrd17       |
| ENSMUSG00000045917 | 2826.900  | 0.898 | 0.128 | 7.020  | 2.2E-12 | 2.442E-11  | Tmem268       |
| ENSMUSG00000046223 | 18992.050 | 0.898 | 0.095 | 9.419  | 4.6E-21 | 8.7099E-20 | Plaur         |
| ENSMUSG00000030223 | 1847.705  | 0.898 | 0.169 | 5.317  | 1.1E-07 | 7.5248E-07 | Ptpro         |
| ENSMUSG00000024644 | 38204.284 | 0.896 | 0.110 | 8.160  | 3.3E-16 | 4.7989E-15 | Cndp2         |
| ENSMUSG00000066148 | 2003.724  | 0.896 | 0.163 | 5.501  | 3.8E-08 | 2.835E-07  | Prpf4         |
| ENSMUSG00000003382 | 5512.083  | 0.896 | 0.122 | 7.323  | 2.4E-13 | 2.8766E-12 | Etv3          |
| ENSMUSG00000071660 | 2746.189  | 0.895 | 0.135 | 6.622  | 3.5E-11 | 3.5252E-10 | Ttc9c         |
| ENSMUSG00000025915 | 5187.973  | 0.894 | 0.119 | 7.509  | 6.0E-14 | 7.3794E-13 | Sgk3          |
| ENSMUSG00000019947 | 4954.449  | 0.893 | 0.101 | 8.887  | 6.3E-19 | 1.0716E-17 | Arid5b        |
| ENSMUSG00000050931 | 5574.534  | 0.893 | 0.129 | 6.900  | 5.2E-12 | 5.5077E-11 | Sgms2         |
| ENSMUSG00000021583 | 3272.387  | 0.893 | 0.098 | 9.081  | 1.1E-19 | 1.9182E-18 | Erap1         |

|                    |            |       |       |        |         |            |            |
|--------------------|------------|-------|-------|--------|---------|------------|------------|
| ENSMUSG00000107950 | 90.903     | 0.893 | 0.265 | 3.371  | 7.5E-04 | 0.00303786 | Gm6375     |
| ENSMUSG00000073411 | 449076.334 | 0.892 | 0.120 | 7.425  | 1.1E-13 | 1.3695E-12 | H2-D1      |
| ENSMUSG00000032253 | 5253.864   | 0.892 | 0.140 | 6.374  | 1.8E-10 | 1.7344E-09 | Phip       |
| ENSMUSG00000060904 | 9109.291   | 0.892 | 0.061 | 14.695 | 6.9E-49 | 3.6655E-47 | Arl1       |
| ENSMUSG00000035273 | 5642.164   | 0.891 | 0.161 | 5.524  | 3.3E-08 | 2.5074E-07 | Hpse       |
| ENSMUSG00000098098 | 212.195    | 0.891 | 0.251 | 3.555  | 3.8E-04 | 0.00162227 | Bvht       |
| ENSMUSG00000019122 | 45609.756  | 0.891 | 0.122 | 7.270  | 3.6E-13 | 4.2168E-12 | Ccl9       |
| ENSMUSG00000041779 | 1951.004   | 0.890 | 0.126 | 7.065  | 1.6E-12 | 1.7853E-11 | Tram2      |
| ENSMUSG00000057367 | 1606.510   | 0.890 | 0.131 | 6.788  | 1.1E-11 | 1.1717E-10 | Birc2      |
| ENSMUSG00000117628 | 200.588    | 0.890 | 0.302 | 2.949  | 3.2E-03 | 0.01140898 | Gm50012    |
| ENSMUSG00000051344 | 2766.039   | 0.890 | 0.113 | 7.838  | 4.6E-15 | 6.055E-14  | Plekhm3    |
| ENSMUSG00000032715 | 558.276    | 0.889 | 0.200 | 4.440  | 9.0E-06 | 5.0311E-05 | Trib3      |
| ENSMUSG00000051314 | 437.522    | 0.889 | 0.240 | 3.697  | 2.2E-04 | 0.00097742 | Ffar2      |
| ENSMUSG00000048327 | 1379.619   | 0.888 | 0.140 | 6.368  | 1.9E-10 | 1.803E-09  | Ckap21     |
| ENSMUSG00000059970 | 849.605    | 0.888 | 0.159 | 5.571  | 2.5E-08 | 1.9332E-07 | Hspa2      |
| ENSMUSG00000073940 | 94.233     | 0.888 | 0.308 | 2.878  | 4.0E-03 | 0.0139492  | Hbb-bt     |
| ENSMUSG00000118106 | 117.436    | 0.887 | 0.291 | 3.048  | 2.3E-03 | 0.00850217 | AC115752.1 |
| ENSMUSG00000026102 | 2523.319   | 0.886 | 0.137 | 6.453  | 1.1E-10 | 1.0482E-09 | Inpp1      |
| ENSMUSG00000026021 | 5590.842   | 0.885 | 0.081 | 10.915 | 9.8E-28 | 2.5198E-26 | Sumo1      |
| ENSMUSG00000027074 | 960.345    | 0.885 | 0.199 | 4.457  | 8.3E-06 | 4.6614E-05 | Slc43a3    |
| ENSMUSG00000031503 | 1786.093   | 0.885 | 0.155 | 5.711  | 1.1E-08 | 8.9452E-08 | Col4a2     |
| ENSMUSG00000092074 | 620.014    | 0.880 | 0.166 | 5.292  | 1.2E-07 | 8.5692E-07 | Dynlt1a    |
| ENSMUSG00000056091 | 10644.273  | 0.879 | 0.132 | 6.650  | 2.9E-11 | 2.9384E-10 | St3gal5    |
| ENSMUSG00000025743 | 32606.848  | 0.879 | 0.137 | 6.414  | 1.4E-10 | 1.3512E-09 | Sdc3       |
| ENSMUSG00000037993 | 3108.778   | 0.879 | 0.112 | 7.866  | 3.7E-15 | 4.9004E-14 | Dhx38      |
| ENSMUSG00000059518 | 4210.975   | 0.879 | 0.104 | 8.412  | 4.0E-17 | 6.1446E-16 | Znhit1     |
| ENSMUSG00000089875 | 228.554    | 0.878 | 0.272 | 3.224  | 1.3E-03 | 0.00491595 | Etohd2     |
| ENSMUSG00000040435 | 3614.931   | 0.877 | 0.126 | 6.955  | 3.5E-12 | 3.8028E-11 | Ppp1r15a   |
| ENSMUSG00000095677 | 333.194    | 0.877 | 0.168 | 5.233  | 1.7E-07 | 1.1602E-06 | Dynlt1f    |
| ENSMUSG00000003847 | 1012.241   | 0.876 | 0.130 | 6.760  | 1.4E-11 | 1.413E-10  | Nfat5      |
| ENSMUSG00000038168 | 184.695    | 0.876 | 0.283 | 3.102  | 1.9E-03 | 0.00722139 | P3h2       |
| ENSMUSG00000037443 | 1549.833   | 0.876 | 0.119 | 7.376  | 1.6E-13 | 1.9552E-12 | Cep85      |
| ENSMUSG00000032042 | 7986.069   | 0.874 | 0.081 | 10.750 | 5.9E-27 | 1.4685E-25 | Srpr       |
| ENSMUSG00000021981 | 3489.261   | 0.874 | 0.123 | 7.101  | 1.2E-12 | 1.3897E-11 | Cab391     |
| ENSMUSG00000005656 | 10827.153  | 0.874 | 0.123 | 7.077  | 1.5E-12 | 1.6404E-11 | Snx6       |
| ENSMUSG00000030341 | 18960.219  | 0.874 | 0.084 | 10.449 | 1.5E-25 | 3.449E-24  | Tnfrsfla   |
| ENSMUSG00000004221 | 6277.698   | 0.873 | 0.087 | 10.047 | 9.4E-24 | 2.0563E-22 | Ikbkg      |
| ENSMUSG00000026579 | 750.086    | 0.873 | 0.233 | 3.748  | 1.8E-04 | 0.00081279 | F5         |
| ENSMUSG00000022378 | 13656.758  | 0.873 | 0.093 | 9.390  | 6.0E-21 | 1.1427E-19 | Cyrib      |
| ENSMUSG00000035311 | 2617.260   | 0.872 | 0.130 | 6.702  | 2.1E-11 | 2.0754E-10 | Gnptab     |
| ENSMUSG00000112880 | 75.037     | 0.871 | 0.312 | 2.796  | 5.2E-03 | 0.01758365 | Gm20337    |
| ENSMUSG00000049680 | 2679.782   | 0.871 | 0.111 | 7.854  | 4.0E-15 | 5.3823E-14 | Urgcp      |
| ENSMUSG00000080848 | 331.999    | 0.871 | 0.150 | 5.800  | 6.6E-09 | 5.3783E-08 | Gm9385     |
| ENSMUSG00000020838 | 952.720    | 0.869 | 0.327 | 2.655  | 7.9E-03 | 0.02559678 | Slc6a4     |
| ENSMUSG00000033557 | 2563.656   | 0.869 | 0.097 | 8.959  | 3.3E-19 | 5.685E-18  | Fam20b     |
| ENSMUSG00000034560 | 5356.823   | 0.868 | 0.091 | 9.580  | 9.7E-22 | 1.9314E-20 | Washc4     |
| ENSMUSG00000026005 | 3779.686   | 0.867 | 0.105 | 8.285  | 1.2E-16 | 1.7423E-15 | Rpe        |
| ENSMUSG00000020585 | 19378.111  | 0.867 | 0.092 | 9.398  | 5.5E-21 | 1.0557E-19 | Laptm4a    |
| ENSMUSG00000041483 | 3820.309   | 0.866 | 0.107 | 8.069  | 7.1E-16 | 9.9712E-15 | Zfp281     |
| ENSMUSG00000009772 | 3474.659   | 0.865 | 0.120 | 7.185  | 6.7E-13 | 7.6897E-12 | Nuak2      |
| ENSMUSG00000019806 | 1857.948   | 0.865 | 0.125 | 6.928  | 4.3E-12 | 4.5897E-11 | Aig1       |
| ENSMUSG00000091313 | 238.982    | 0.865 | 0.180 | 4.809  | 1.5E-06 | 9.3411E-06 | Fth-ps2    |

|                    |           |       |       |        |         |            |               |
|--------------------|-----------|-------|-------|--------|---------|------------|---------------|
| ENSMUSG00000040128 | 10075.744 | 0.865 | 0.103 | 8.437  | 3.3E-17 | 5.0042E-16 | Pnrcl         |
| ENSMUSG00000023460 | 3216.921  | 0.865 | 0.092 | 9.439  | 3.8E-21 | 7.2635E-20 | Rab12         |
| ENSMUSG00000116811 | 136.677   | 0.864 | 0.214 | 4.047  | 5.2E-05 | 0.00025829 | Gm16385       |
| ENSMUSG00000033970 | 1623.956  | 0.864 | 0.137 | 6.295  | 3.1E-10 | 2.8393E-09 | Rfc3          |
| ENSMUSG00000026740 | 2698.085  | 0.864 | 0.111 | 7.810  | 5.7E-15 | 7.5317E-14 | Dnajc1        |
| ENSMUSG00000046668 | 319.342   | 0.863 | 0.338 | 2.551  | 1.1E-02 | 0.03329196 | Cxxc5         |
| ENSMUSG00000002820 | 1934.977  | 0.863 | 0.104 | 8.332  | 7.9E-17 | 1.1899E-15 | Atg4d         |
| ENSMUSG00000079316 | 2514.494  | 0.862 | 0.146 | 5.906  | 3.5E-09 | 2.9341E-08 | Rab9          |
| ENSMUSG00000019868 | 3165.494  | 0.862 | 0.099 | 8.671  | 4.3E-18 | 6.9722E-17 | Vta1          |
| ENSMUSG00000114759 | 63.945    | 0.862 | 0.319 | 2.706  | 6.8E-03 | 0.02240781 | Gm10257       |
| ENSMUSG00000041645 | 8771.582  | 0.862 | 0.084 | 10.238 | 1.3E-24 | 3.04E-23   | Ddx24         |
| ENSMUSG00000046916 | 545.799   | 0.861 | 0.284 | 3.033  | 2.4E-03 | 0.00888838 | Myct1         |
| ENSMUSG00000055401 | 6023.515  | 0.861 | 0.100 | 8.578  | 9.6E-18 | 1.5368E-16 | Fbxo6         |
| ENSMUSG00000083474 | 121.001   | 0.860 | 0.236 | 3.638  | 2.7E-04 | 0.00121441 | Gm15267       |
| ENSMUSG00000116657 | 525.689   | 0.860 | 0.250 | 3.439  | 5.8E-04 | 0.00242033 | Gm49774       |
| ENSMUSG00000051316 | 1639.880  | 0.859 | 0.126 | 6.822  | 9.0E-12 | 9.3784E-11 | Taf7          |
| ENSMUSG00000024511 | 1065.341  | 0.858 | 0.279 | 3.076  | 2.1E-03 | 0.0078127  | Rab27b        |
| ENSMUSG00000117634 | 129.680   | 0.857 | 0.266 | 3.224  | 1.3E-03 | 0.00492361 | Gm50069       |
| ENSMUSG00000024542 | 541.195   | 0.857 | 0.193 | 4.447  | 8.7E-06 | 4.8706E-05 | Cep192        |
| ENSMUSG00000025804 | 9407.511  | 0.857 | 0.178 | 4.805  | 1.6E-06 | 9.5356E-06 | Ccr1          |
| ENSMUSG00000027454 | 324.500   | 0.857 | 0.244 | 3.507  | 4.5E-04 | 0.00191275 | Gins1         |
| ENSMUSG00000031245 | 477.000   | 0.857 | 0.185 | 4.628  | 3.7E-06 | 2.1723E-05 | Hmgn5         |
| ENSMUSG00000034613 | 7295.745  | 0.856 | 0.073 | 11.697 | 1.3E-31 | 3.9289E-30 | Ppm1h         |
| ENSMUSG00000037400 | 7013.715  | 0.854 | 0.116 | 7.332  | 2.3E-13 | 2.7067E-12 | Atp11b        |
| ENSMUSG00000020100 | 4121.441  | 0.854 | 0.158 | 5.403  | 6.5E-08 | 4.7737E-07 | Slc29a3       |
| ENSMUSG00000036528 | 4304.858  | 0.854 | 0.158 | 5.395  | 6.9E-08 | 4.9996E-07 | Pfifbp2       |
| ENSMUSG00000042133 | 5844.185  | 0.853 | 0.105 | 8.116  | 4.8E-16 | 6.8819E-15 | Ppig          |
| ENSMUSG00000028466 | 3834.787  | 0.853 | 0.078 | 10.966 | 5.5E-28 | 1.4382E-26 | Creb3         |
| ENSMUSG00000021423 | 13569.239 | 0.852 | 0.174 | 4.899  | 9.6E-07 | 6.0718E-06 | Ly86          |
| ENSMUSG00000037788 | 2096.654  | 0.850 | 0.142 | 5.997  | 2.0E-09 | 1.7223E-08 | Vopp1         |
| ENSMUSG00000021774 | 1547.116  | 0.850 | 0.117 | 7.264  | 3.7E-13 | 4.3784E-12 | Ube2e1        |
| ENSMUSG00000118653 | 623.252   | 0.850 | 0.107 | 7.907  | 2.6E-15 | 3.5709E-14 | AC159819.1    |
| ENSMUSG00000054091 | 3299.049  | 0.849 | 0.106 | 8.012  | 1.1E-15 | 1.5624E-14 | 1810037I17Rik |
| ENSMUSG00000024661 | #####     | 0.849 | 0.097 | 8.711  | 3.0E-18 | 4.9456E-17 | Fth1          |
| ENSMUSG00000023845 | 5798.250  | 0.849 | 0.105 | 8.054  | 8.0E-16 | 1.1187E-14 | Lnpep         |
| ENSMUSG00000026864 | 77690.952 | 0.848 | 0.075 | 11.368 | 6.0E-30 | 1.701E-28  | Hspa5         |
| ENSMUSG00000027829 | 7963.066  | 0.848 | 0.096 | 8.823  | 1.1E-18 | 1.8691E-17 | Ccn11         |
| ENSMUSG00000020437 | 15599.077 | 0.847 | 0.116 | 7.331  | 2.3E-13 | 2.7191E-12 | Myo1g         |
| ENSMUSG00000047446 | 1319.566  | 0.846 | 0.163 | 5.188  | 2.1E-07 | 1.4555E-06 | Arl4a         |
| ENSMUSG00000038543 | 1085.911  | 0.845 | 0.128 | 6.593  | 4.3E-11 | 4.2532E-10 | BC028528      |
| ENSMUSG00000014867 | 28224.299 | 0.845 | 0.069 | 12.234 | 2.1E-34 | 6.8956E-33 | Surf4         |
| ENSMUSG00000022179 | 299.595   | 0.844 | 0.343 | 2.462  | 1.4E-02 | 0.0415937  | 4931414P19Rik |
| ENSMUSG00000056529 | 28416.597 | 0.844 | 0.132 | 6.412  | 1.4E-10 | 1.3646E-09 | Ptafr         |
| ENSMUSG00000019173 | 14025.948 | 0.843 | 0.113 | 7.464  | 8.4E-14 | 1.0295E-12 | Rab5c         |
| ENSMUSG00000037313 | 1909.251  | 0.841 | 0.098 | 8.543  | 1.3E-17 | 2.058E-16  | Tacc3         |
| ENSMUSG00000027765 | 571.468   | 0.841 | 0.193 | 4.363  | 1.3E-05 | 6.9916E-05 | P2ry1         |
| ENSMUSG00000094530 | 1214.779  | 0.840 | 0.147 | 5.700  | 1.2E-08 | 9.498E-08  | Gm21399       |
| ENSMUSG00000112808 | 78.897    | 0.840 | 0.339 | 2.480  | 1.3E-02 | 0.03983358 | Gm4739        |
| ENSMUSG00000028159 | 2885.281  | 0.840 | 0.116 | 7.236  | 4.6E-13 | 5.3789E-12 | Dapp1         |
| ENSMUSG00000006262 | 1524.721  | 0.839 | 0.150 | 5.601  | 2.1E-08 | 1.647E-07  | Mob1b         |
| ENSMUSG00000027637 | 6632.989  | 0.839 | 0.117 | 7.157  | 8.3E-13 | 9.3805E-12 | Rab5if        |
| ENSMUSG00000075122 | 560.685   | 0.838 | 0.236 | 3.548  | 3.9E-04 | 0.00166317 | Cd80          |

|                    |            |       |       |        |         |            |               |
|--------------------|------------|-------|-------|--------|---------|------------|---------------|
| ENSMUSG00000024966 | 8966.306   | 0.838 | 0.078 | 10.772 | 4.7E-27 | 1.1641E-25 | Stip1         |
| ENSMUSG00000057342 | 5430.208   | 0.837 | 0.116 | 7.199  | 6.1E-13 | 6.9679E-12 | Sphk2         |
| ENSMUSG00000052763 | 1072.593   | 0.837 | 0.210 | 3.993  | 6.5E-05 | 0.00031971 | Zfp212        |
| ENSMUSG00000018476 | 6567.949   | 0.837 | 0.149 | 5.618  | 1.9E-08 | 1.4962E-07 | Kdm6b         |
| ENSMUSG00000024066 | 10550.915  | 0.837 | 0.155 | 5.408  | 6.4E-08 | 4.6557E-07 | Xdh           |
| ENSMUSG00000022529 | 7331.824   | 0.836 | 0.097 | 8.657  | 4.8E-18 | 7.851E-17  | Zfp263        |
| ENSMUSG00000068250 | 1232.118   | 0.835 | 0.169 | 4.938  | 7.9E-07 | 5.0297E-06 | Amn1          |
| ENSMUSG00000020474 | 722.832    | 0.835 | 0.215 | 3.891  | 1.0E-04 | 0.00047393 | Polm          |
| ENSMUSG00000020271 | 7656.880   | 0.834 | 0.120 | 6.967  | 3.2E-12 | 3.5128E-11 | Fbxw11        |
| ENSMUSG00000035011 | 15203.131  | 0.834 | 0.103 | 8.110  | 5.1E-16 | 7.1936E-15 | Zbtb7a        |
| ENSMUSG00000029992 | 1540.772   | 0.832 | 0.110 | 7.562  | 4.0E-14 | 4.9513E-13 | Gfpt1         |
| ENSMUSG00000068040 | 7010.388   | 0.831 | 0.105 | 7.903  | 2.7E-15 | 3.6615E-14 | Tm9sf4        |
| ENSMUSG00000025163 | 146.689    | 0.831 | 0.339 | 2.452  | 1.4E-02 | 0.04260923 | Cd7           |
| ENSMUSG00000021338 | 839.389    | 0.831 | 0.172 | 4.839  | 1.3E-06 | 8.0804E-06 | Carmil1       |
| ENSMUSG00000058407 | 6100.204   | 0.831 | 0.077 | 10.843 | 2.2E-27 | 5.4414E-26 | Txndc9        |
| ENSMUSG00000038485 | 721.098    | 0.829 | 0.175 | 4.734  | 2.2E-06 | 1.3315E-05 | Socs7         |
| ENSMUSG00000024824 | 2110.812   | 0.828 | 0.140 | 5.928  | 3.1E-09 | 2.5823E-08 | Rad9a         |
| ENSMUSG00000020844 | 1053.367   | 0.828 | 0.129 | 6.419  | 1.4E-10 | 1.3067E-09 | Nxn           |
| ENSMUSG00000032484 | 128091.682 | 0.828 | 0.194 | 4.270  | 2.0E-05 | 0.00010361 | Ngp           |
| ENSMUSG00000024241 | 747.852    | 0.827 | 0.275 | 3.008  | 2.6E-03 | 0.00957285 | Sos1          |
| ENSMUSG00000034947 | 24346.492  | 0.827 | 0.125 | 6.610  | 3.8E-11 | 3.8136E-10 | Tmem106a      |
| ENSMUSG00000066278 | 1992.386   | 0.826 | 0.126 | 6.568  | 5.1E-11 | 4.9885E-10 | Vps37b        |
| ENSMUSG00000020423 | 5298.958   | 0.825 | 0.077 | 10.706 | 9.6E-27 | 2.3466E-25 | Btg2          |
| ENSMUSG00000019505 | 47569.812  | 0.824 | 0.112 | 7.390  | 1.5E-13 | 1.7656E-12 | Ubb           |
| ENSMUSG00000002325 | 5799.260   | 0.824 | 0.161 | 5.130  | 2.9E-07 | 1.9565E-06 | Irf9          |
| ENSMUSG00000029125 | 1773.104   | 0.824 | 0.171 | 4.814  | 1.5E-06 | 9.1389E-06 | Stx18         |
| ENSMUSG00000072769 | 176.920    | 0.823 | 0.284 | 2.904  | 3.7E-03 | 0.01295853 | Gm10419       |
| ENSMUSG00000015671 | 14104.440  | 0.823 | 0.073 | 11.262 | 2.0E-29 | 5.5933E-28 | Psma2         |
| ENSMUSG00000036644 | 3818.209   | 0.822 | 0.120 | 6.826  | 8.7E-12 | 9.0993E-11 | Tbc1d9b       |
| ENSMUSG00000056268 | 1868.826   | 0.822 | 0.183 | 4.495  | 6.9E-06 | 3.9402E-05 | Dennd1b       |
| ENSMUSG00000024174 | 386.523    | 0.822 | 0.244 | 3.367  | 7.6E-04 | 0.00307969 | Pot1b         |
| ENSMUSG00000018042 | 23066.176  | 0.822 | 0.098 | 8.342  | 7.3E-17 | 1.0955E-15 | Cyb5r3        |
| ENSMUSG00000024989 | 299.680    | 0.821 | 0.253 | 3.244  | 1.2E-03 | 0.00462374 | Cep55         |
| ENSMUSG00000019210 | 19834.170  | 0.821 | 0.061 | 13.523 | 1.2E-41 | 4.9877E-40 | Atp6v1e1      |
| ENSMUSG00000014599 | 10858.047  | 0.821 | 0.145 | 5.670  | 1.4E-08 | 1.1213E-07 | Csfl          |
| ENSMUSG00000015733 | 43945.212  | 0.820 | 0.077 | 10.669 | 1.4E-26 | 3.4536E-25 | Capza2        |
| ENSMUSG00000046463 | 143.477    | 0.820 | 0.343 | 2.386  | 1.7E-02 | 0.04986125 | 5930403N24Rik |
| ENSMUSG00000045954 | 817.220    | 0.819 | 0.268 | 3.061  | 2.2E-03 | 0.0081845  | Cavin2        |
| ENSMUSG00000031778 | 3217.159   | 0.819 | 0.186 | 4.393  | 1.1E-05 | 6.1483E-05 | Cx3c11        |
| ENSMUSG00000035799 | 115.081    | 0.817 | 0.319 | 2.562  | 1.0E-02 | 0.03232651 | Twist1        |
| ENSMUSG00000033644 | 224.025    | 0.817 | 0.272 | 3.010  | 2.6E-03 | 0.00952639 | Piwil2        |
| ENSMUSG00000020290 | 4599.944   | 0.817 | 0.149 | 5.500  | 3.8E-08 | 2.8477E-07 | Xpo1          |
| ENSMUSG00000031337 | 1959.838   | 0.816 | 0.119 | 6.846  | 7.6E-12 | 7.9394E-11 | Mtm1          |
| ENSMUSG00000029501 | 3709.284   | 0.815 | 0.163 | 5.015  | 5.3E-07 | 3.4448E-06 | Ankle2        |
| ENSMUSG00000016256 | 121774.494 | 0.815 | 0.074 | 11.056 | 2.0E-28 | 5.3967E-27 | Ctsz          |
| ENSMUSG00000035711 | 6289.688   | 0.815 | 0.097 | 8.424  | 3.6E-17 | 5.5319E-16 | Dok3          |
| ENSMUSG00000100394 | 196.099    | 0.815 | 0.301 | 2.709  | 6.7E-03 | 0.02220459 | Gm28791       |
| ENSMUSG00000033949 | 665.150    | 0.814 | 0.222 | 3.661  | 2.5E-04 | 0.00111541 | Trim36        |
| ENSMUSG00000030159 | 1268.192   | 0.813 | 0.278 | 2.921  | 3.5E-03 | 0.0123626  | Clec1b        |
| ENSMUSG00000005125 | 500.343    | 0.811 | 0.223 | 3.630  | 2.8E-04 | 0.00124962 | Ndrgl         |
| ENSMUSG00000021254 | 1965.003   | 0.811 | 0.112 | 7.226  | 5.0E-13 | 5.7479E-12 | Gpatch21      |
| ENSMUSG00000109555 | 237.966    | 0.810 | 0.327 | 2.474  | 1.3E-02 | 0.04035678 | Gm44891       |

|                    |           |       |       |        |         |            |               |
|--------------------|-----------|-------|-------|--------|---------|------------|---------------|
| ENSMUSG00000055216 | 77.170    | 0.810 | 0.319 | 2.540  | 1.1E-02 | 0.03426812 | 9430025C20Rik |
| ENSMUSG00000039081 | 940.944   | 0.810 | 0.165 | 4.906  | 9.3E-07 | 5.8575E-06 | Zfp503        |
| ENSMUSG00000024955 | 1675.688  | 0.809 | 0.117 | 6.915  | 4.7E-12 | 5.0106E-11 | Esrra         |
| ENSMUSG00000033933 | 2007.440  | 0.808 | 0.139 | 5.811  | 6.2E-09 | 5.0741E-08 | Vhl           |
| ENSMUSG00000003379 | 402.993   | 0.808 | 0.312 | 2.588  | 9.6E-03 | 0.03026979 | Cd79a         |
| ENSMUSG00000063450 | 459.770   | 0.808 | 0.204 | 3.960  | 7.5E-05 | 0.00036317 | Syne2         |
| ENSMUSG00000014547 | 6489.571  | 0.808 | 0.128 | 6.313  | 2.7E-10 | 2.5303E-09 | Wdfy2         |
| ENSMUSG00000020790 | 4517.933  | 0.808 | 0.113 | 7.151  | 8.6E-13 | 9.7499E-12 | Ankfy1        |
| ENSMUSG00000031669 | 363.316   | 0.807 | 0.259 | 3.120  | 1.8E-03 | 0.00681122 | Gins3         |
| ENSMUSG00000026155 | 2263.695  | 0.807 | 0.171 | 4.716  | 2.4E-06 | 1.4486E-05 | Smap1         |
| ENSMUSG00000035151 | 987.734   | 0.806 | 0.179 | 4.510  | 6.5E-06 | 3.6845E-05 | Elmod2        |
| ENSMUSG00000021065 | 2372.438  | 0.805 | 0.116 | 6.947  | 3.7E-12 | 4.0345E-11 | Fut8          |
| ENSMUSG00000020919 | 2890.917  | 0.805 | 0.127 | 6.350  | 2.2E-10 | 2.0224E-09 | Stat5b        |
| ENSMUSG00000021868 | 2411.761  | 0.805 | 0.139 | 5.795  | 6.8E-09 | 5.5332E-08 | Ppif          |
| ENSMUSG00000034361 | 7309.496  | 0.805 | 0.082 | 9.773  | 1.5E-22 | 3.0283E-21 | Cpne2         |
| ENSMUSG00000028821 | 5948.944  | 0.805 | 0.092 | 8.746  | 2.2E-18 | 3.6491E-17 | Syf2          |
| ENSMUSG00000069910 | 493.709   | 0.804 | 0.191 | 4.218  | 2.5E-05 | 0.00012825 | Spd11         |
| ENSMUSG00000022799 | 2623.995  | 0.804 | 0.126 | 6.396  | 1.6E-10 | 1.5076E-09 | Arhgap31      |
| ENSMUSG00000020300 | 4916.318  | 0.803 | 0.157 | 5.121  | 3.0E-07 | 2.0411E-06 | Cpeb4         |
| ENSMUSG00000020467 | 302.660   | 0.803 | 0.260 | 3.084  | 2.0E-03 | 0.00761446 | Efemp1        |
| ENSMUSG00000038172 | 2010.525  | 0.802 | 0.138 | 5.813  | 6.2E-09 | 5.0213E-08 | Ttc39b        |
| ENSMUSG00000034480 | 2632.796  | 0.802 | 0.146 | 5.485  | 4.1E-08 | 3.0868E-07 | Diaph2        |
| ENSMUSG00000050732 | 16334.831 | 0.802 | 0.084 | 9.523  | 1.7E-21 | 3.3081E-20 | Vamp8         |
| ENSMUSG00000038023 | 3833.750  | 0.802 | 0.131 | 6.115  | 9.6E-10 | 8.493E-09  | Atp6v0a2      |
| ENSMUSG00000061288 | 12208.497 | 0.801 | 0.136 | 5.895  | 3.7E-09 | 3.1237E-08 | Taok3         |
| ENSMUSG00000039156 | 4415.362  | 0.801 | 0.071 | 11.235 | 2.7E-29 | 7.5025E-28 | Stim2         |
| ENSMUSG00000026341 | 45046.453 | 0.801 | 0.083 | 9.620  | 6.6E-22 | 1.3147E-20 | Actr3         |
| ENSMUSG00000078578 | 29275.407 | 0.800 | 0.056 | 14.236 | 5.5E-46 | 2.6725E-44 | Ube2d3        |
| ENSMUSG00000029802 | 665.825   | 0.800 | 0.175 | 4.572  | 4.8E-06 | 2.7967E-05 | Abcg2         |
| ENSMUSG00000050550 | 75.768    | 0.800 | 0.333 | 2.404  | 1.6E-02 | 0.04785612 | Gm11868       |
| ENSMUSG00000033658 | 710.775   | 0.800 | 0.125 | 6.389  | 1.7E-10 | 1.574E-09  | Ddx19b        |
| ENSMUSG00000057219 | 1964.734  | 0.799 | 0.147 | 5.439  | 5.4E-08 | 3.9543E-07 | Armc7         |
| ENSMUSG00000037270 | 1794.814  | 0.799 | 0.134 | 5.982  | 2.2E-09 | 1.8808E-08 | 4932438A13Rik |
| ENSMUSG00000030793 | 4330.253  | 0.799 | 0.148 | 5.384  | 7.3E-08 | 5.2982E-07 | Pycard        |
| ENSMUSG00000021996 | 76234.603 | 0.798 | 0.067 | 11.964 | 5.5E-33 | 1.7484E-31 | Esd           |
| ENSMUSG00000098192 | 48.611    | 0.798 | 0.317 | 2.522  | 1.2E-02 | 0.03582999 | Gm3534        |
| ENSMUSG00000050953 | 3788.083  | 0.798 | 0.157 | 5.096  | 3.5E-07 | 2.317E-06  | Gja1          |
| ENSMUSG00000053063 | 8716.717  | 0.798 | 0.107 | 7.441  | 1.0E-13 | 1.2128E-12 | Clec12a       |
| ENSMUSG00000052137 | 396.178   | 0.797 | 0.209 | 3.811  | 1.4E-04 | 0.00064455 | Rbm12b2       |
| ENSMUSG00000055720 | 4140.260  | 0.797 | 0.092 | 8.656  | 4.9E-18 | 7.9141E-17 | Ubl7          |
| ENSMUSG00000001786 | 1741.177  | 0.797 | 0.093 | 8.536  | 1.4E-17 | 2.1802E-16 | Fbxo7         |
| ENSMUSG00000046079 | 3699.618  | 0.797 | 0.098 | 8.135  | 4.1E-16 | 5.8959E-15 | Lrrc8d        |
| ENSMUSG00000017428 | 8749.927  | 0.796 | 0.059 | 13.504 | 1.5E-41 | 6.4187E-40 | Psmd11        |
| ENSMUSG00000006134 | 2678.870  | 0.796 | 0.104 | 7.667  | 1.8E-14 | 2.2357E-13 | Crkl          |
| ENSMUSG00000060073 | 9355.361  | 0.796 | 0.073 | 10.894 | 1.2E-27 | 3.1475E-26 | Psma3         |
| ENSMUSG00000032754 | 5672.108  | 0.794 | 0.115 | 6.882  | 5.9E-12 | 6.2228E-11 | Slc8b1        |
| ENSMUSG00000040761 | 1877.085  | 0.794 | 0.184 | 4.322  | 1.5E-05 | 8.3074E-05 | Spen          |
| ENSMUSG00000027694 | 469.371   | 0.794 | 0.227 | 3.504  | 4.6E-04 | 0.00193346 | Gm8325        |
| ENSMUSG00000020868 | 10874.784 | 0.794 | 0.151 | 5.264  | 1.4E-07 | 9.9109E-07 | Xylt2         |
| ENSMUSG00000082319 | 492.552   | 0.794 | 0.128 | 6.224  | 4.9E-10 | 4.3908E-09 | Actr3-ps      |
| ENSMUSG00000027613 | 16734.719 | 0.793 | 0.084 | 9.496  | 2.2E-21 | 4.2528E-20 | Eif6          |
| ENSMUSG00000020413 | 587.835   | 0.793 | 0.198 | 4.009  | 6.1E-05 | 0.0003004  | Hus1          |

|                    |           |       |       |        |         |            |               |
|--------------------|-----------|-------|-------|--------|---------|------------|---------------|
| ENSMUSG00000040482 | 1631.389  | 0.793 | 0.150 | 5.300  | 1.2E-07 | 8.2345E-07 | Dxo           |
| ENSMUSG00000032849 | 1793.515  | 0.791 | 0.179 | 4.426  | 9.6E-06 | 5.3371E-05 | Abcc4         |
| ENSMUSG00000081999 | 99.057    | 0.791 | 0.313 | 2.531  | 1.1E-02 | 0.0350761  | Gm13461       |
| ENSMUSG00000025171 | 6967.260  | 0.790 | 0.101 | 7.825  | 5.1E-15 | 6.706E-14  | Ubtd1         |
| ENSMUSG00000058755 | 1124.707  | 0.790 | 0.193 | 4.094  | 4.2E-05 | 0.00021357 | Osm           |
| ENSMUSG00000059900 | 1194.629  | 0.789 | 0.252 | 3.134  | 1.7E-03 | 0.00653005 | Tmem40        |
| ENSMUSG00000048163 | 12784.250 | 0.788 | 0.074 | 10.698 | 1.0E-26 | 2.5414E-25 | Selplg        |
| ENSMUSG00000032497 | 5098.038  | 0.788 | 0.076 | 10.307 | 6.5E-25 | 1.4881E-23 | Lrrfip2       |
| ENSMUSG00000043895 | 9083.833  | 0.788 | 0.138 | 5.703  | 1.2E-08 | 9.3142E-08 | S1pr2         |
| ENSMUSG00000025193 | 926.036   | 0.788 | 0.159 | 4.962  | 7.0E-07 | 4.4565E-06 | Cutc          |
| ENSMUSG00000039989 | 2236.923  | 0.787 | 0.114 | 6.881  | 5.9E-12 | 6.2771E-11 | Cbx4          |
| ENSMUSG00000051147 | 473.590   | 0.787 | 0.180 | 4.381  | 1.2E-05 | 6.4742E-05 | Nat2          |
| ENSMUSG00000028484 | 1424.221  | 0.787 | 0.137 | 5.735  | 9.7E-09 | 7.7908E-08 | Psip1         |
| ENSMUSG00000033684 | 2493.176  | 0.786 | 0.122 | 6.426  | 1.3E-10 | 1.2454E-09 | Qsox1         |
| ENSMUSG00000017801 | 3133.405  | 0.786 | 0.089 | 8.842  | 9.4E-19 | 1.5946E-17 | Mlx           |
| ENSMUSG00000030002 | 4302.424  | 0.785 | 0.105 | 7.502  | 6.3E-14 | 7.7842E-13 | Dusp11        |
| ENSMUSG00000005804 | 3321.215  | 0.784 | 0.132 | 5.922  | 3.2E-09 | 2.6718E-08 | Bloc1s6       |
| ENSMUSG00000024924 | 733.342   | 0.784 | 0.244 | 3.216  | 1.3E-03 | 0.00504364 | Vldlr         |
| ENSMUSG00000020936 | 6906.441  | 0.783 | 0.086 | 9.134  | 6.6E-20 | 1.1882E-18 | Nmt1          |
| ENSMUSG00000020235 | 6732.918  | 0.783 | 0.108 | 7.251  | 4.2E-13 | 4.8333E-12 | Fzr1          |
| ENSMUSG00000062944 | 501.738   | 0.783 | 0.197 | 3.965  | 7.3E-05 | 0.00035682 | 9130023H24Rik |
| ENSMUSG00000021377 | 6677.420  | 0.782 | 0.115 | 6.810  | 9.8E-12 | 1.0154E-10 | Dek           |
| ENSMUSG00000074578 | 1099.453  | 0.782 | 0.164 | 4.777  | 1.8E-06 | 1.0858E-05 | Zfas1         |
| ENSMUSG00000003037 | 11124.450 | 0.781 | 0.082 | 9.487  | 2.4E-21 | 4.6117E-20 | Rab8a         |
| ENSMUSG00000027944 | 2850.401  | 0.781 | 0.091 | 8.581  | 9.4E-18 | 1.508E-16  | Hax1          |
| ENSMUSG00000025340 | 4535.543  | 0.781 | 0.089 | 8.777  | 1.7E-18 | 2.7988E-17 | Rabgef1       |
| ENSMUSG00000022052 | 5451.051  | 0.780 | 0.082 | 9.550  | 1.3E-21 | 2.5552E-20 | Ppp2r2a       |
| ENSMUSG00000001946 | 633.224   | 0.778 | 0.231 | 3.367  | 7.6E-04 | 0.00307565 | Esam          |
| ENSMUSG00000041028 | 25329.182 | 0.778 | 0.074 | 10.529 | 6.4E-26 | 1.5018E-24 | Ghitm         |
| ENSMUSG00000027835 | 4037.298  | 0.777 | 0.095 | 8.179  | 2.9E-16 | 4.1494E-15 | Pdcd10        |
| ENSMUSG00000034243 | 2418.339  | 0.777 | 0.137 | 5.668  | 1.4E-08 | 1.1305E-07 | Golgb1        |
| ENSMUSG00000024878 | 654.597   | 0.776 | 0.181 | 4.291  | 1.8E-05 | 9.4876E-05 | Cbwd1         |
| ENSMUSG00000044471 | 504.074   | 0.776 | 0.191 | 4.064  | 4.8E-05 | 0.00024135 | Lncpint       |
| ENSMUSG00000044201 | 231.785   | 0.776 | 0.257 | 3.017  | 2.6E-03 | 0.00932153 | Cdc25c        |
| ENSMUSG00000025277 | 157.216   | 0.775 | 0.275 | 2.822  | 4.8E-03 | 0.01638843 | Abhd6         |
| ENSMUSG00000045328 | 712.122   | 0.774 | 0.185 | 4.180  | 2.9E-05 | 0.00014992 | Cenpe         |
| ENSMUSG00000000538 | 868.382   | 0.774 | 0.210 | 3.682  | 2.3E-04 | 0.00103534 | Tom112        |
| ENSMUSG00000040018 | 1746.485  | 0.773 | 0.145 | 5.343  | 9.2E-08 | 6.5652E-07 | Cox15         |
| ENSMUSG00000017499 | 326.374   | 0.773 | 0.264 | 2.928  | 3.4E-03 | 0.01211551 | Cdc6          |
| ENSMUSG00000064090 | 1359.525  | 0.771 | 0.140 | 5.510  | 3.6E-08 | 2.6974E-07 | Vrk2          |
| ENSMUSG00000079227 | 10070.584 | 0.771 | 0.184 | 4.187  | 2.8E-05 | 0.00014591 | Ccr5          |
| ENSMUSG00000116957 | 275.401   | 0.771 | 0.286 | 2.693  | 7.1E-03 | 0.02313224 | Gm34680       |
| ENSMUSG00000072980 | 216.068   | 0.771 | 0.225 | 3.432  | 6.0E-04 | 0.00247798 | Oip5          |
| ENSMUSG00000020261 | 409.522   | 0.770 | 0.174 | 4.436  | 9.2E-06 | 5.0958E-05 | Slc36a1       |
| ENSMUSG00000048118 | 3387.259  | 0.770 | 0.142 | 5.409  | 6.3E-08 | 4.6314E-07 | Arid4a        |
| ENSMUSG00000040312 | 277.556   | 0.770 | 0.312 | 2.471  | 1.3E-02 | 0.04064138 | Ccher1        |
| ENSMUSG00000022370 | 1413.807  | 0.770 | 0.111 | 6.956  | 3.5E-12 | 3.7953E-11 | Mrpl13        |
| ENSMUSG00000035847 | 728.747   | 0.770 | 0.167 | 4.618  | 3.9E-06 | 2.2727E-05 | Ids           |
| ENSMUSG00000025757 | 1579.475  | 0.770 | 0.170 | 4.527  | 6.0E-06 | 3.421E-05  | Hspa41        |
| ENSMUSG00000099398 | 893.095   | 0.769 | 0.197 | 3.907  | 9.4E-05 | 0.000446   | Ms4a14        |
| ENSMUSG00000045268 | 785.617   | 0.769 | 0.142 | 5.432  | 5.6E-08 | 4.1084E-07 | Zfp691        |
| ENSMUSG00000031758 | 1194.613  | 0.769 | 0.215 | 3.574  | 3.5E-04 | 0.00151998 | Cdyl2         |

|                     |           |       |       |        |         |            |           |
|---------------------|-----------|-------|-------|--------|---------|------------|-----------|
| ENSMUSG00000018565  | 4891.764  | 0.768 | 0.084 | 9.167  | 4.8E-20 | 8.7973E-19 | Elp5      |
| ENSMUSG00000017144  | 3066.013  | 0.768 | 0.161 | 4.757  | 2.0E-06 | 1.1969E-05 | Rnd3      |
| ENSMUSG000000037096 | 379.551   | 0.768 | 0.201 | 3.817  | 1.3E-04 | 0.00062779 | Gm9762    |
| ENSMUSG000000020744 | 2209.028  | 0.768 | 0.117 | 6.583  | 4.6E-11 | 4.5357E-10 | Slc25a19  |
| ENSMUSG000000074227 | 631.102   | 0.768 | 0.199 | 3.858  | 1.1E-04 | 0.00053663 | Spint2    |
| ENSMUSG000000036737 | 2051.657  | 0.767 | 0.143 | 5.354  | 8.6E-08 | 6.2029E-07 | Oxsr1     |
| ENSMUSG000000023908 | 1287.230  | 0.766 | 0.193 | 3.971  | 7.2E-05 | 0.00034772 | Pkmyt1    |
| ENSMUSG000000027222 | 2006.398  | 0.766 | 0.127 | 6.029  | 1.6E-09 | 1.4215E-08 | Pex16     |
| ENSMUSG000000055319 | 2219.995  | 0.765 | 0.117 | 6.534  | 6.4E-11 | 6.2182E-10 | Sec23ip   |
| ENSMUSG000000066568 | 4838.163  | 0.765 | 0.101 | 7.606  | 2.8E-14 | 3.5657E-13 | Lsm14a    |
| ENSMUSG00000001062  | 1532.017  | 0.764 | 0.200 | 3.830  | 1.3E-04 | 0.00059796 | Vps9d1    |
| ENSMUSG000000028790 | 7232.459  | 0.764 | 0.091 | 8.426  | 3.6E-17 | 5.4503E-16 | Khdrbs1   |
| ENSMUSG00000001441  | 5068.203  | 0.764 | 0.089 | 8.580  | 9.5E-18 | 1.5174E-16 | Npepps    |
| ENSMUSG000000046179 | 561.812   | 0.763 | 0.211 | 3.611  | 3.1E-04 | 0.00133389 | E2f8      |
| ENSMUSG000000057963 | 2202.208  | 0.762 | 0.113 | 6.755  | 1.4E-11 | 1.4605E-10 | Itpk1     |
| ENSMUSG000000019961 | 4913.713  | 0.761 | 0.135 | 5.631  | 1.8E-08 | 1.3912E-07 | Tmpo      |
| ENSMUSG000000057729 | 9247.772  | 0.760 | 0.124 | 6.143  | 8.1E-10 | 7.1765E-09 | Prtn3     |
| ENSMUSG000000031584 | 44654.238 | 0.760 | 0.089 | 8.534  | 1.4E-17 | 2.2283E-16 | Gsr       |
| ENSMUSG000000022475 | 957.455   | 0.760 | 0.172 | 4.413  | 1.0E-05 | 5.6209E-05 | Hdac7     |
| ENSMUSG000000070000 | 846.132   | 0.760 | 0.214 | 3.557  | 3.7E-04 | 0.00161025 | Fcho1     |
| ENSMUSG000000047454 | 724.836   | 0.759 | 0.198 | 3.833  | 1.3E-04 | 0.00059155 | Gphn      |
| ENSMUSG000000108238 | 493.703   | 0.758 | 0.215 | 3.532  | 4.1E-04 | 0.00175917 | Gm43984   |
| ENSMUSG000000028073 | 397.488   | 0.758 | 0.286 | 2.653  | 8.0E-03 | 0.02570871 | Pear1     |
| ENSMUSG000000053475 | 330.919   | 0.758 | 0.228 | 3.329  | 8.7E-04 | 0.00349929 | Tnfaip6   |
| ENSMUSG000000042599 | 2576.277  | 0.757 | 0.139 | 5.468  | 4.6E-08 | 3.3917E-07 | Kdm7a     |
| ENSMUSG000000078942 | 406.627   | 0.757 | 0.181 | 4.191  | 2.8E-05 | 0.00014321 | Naip6     |
| ENSMUSG000000040648 | 2125.114  | 0.757 | 0.131 | 5.775  | 7.7E-09 | 6.1936E-08 | Ppip5k2   |
| ENSMUSG000000040009 | 940.302   | 0.757 | 0.251 | 3.018  | 2.5E-03 | 0.00929572 | Gnaz      |
| ENSMUSG000000021809 | 898.530   | 0.756 | 0.230 | 3.282  | 1.0E-03 | 0.00408498 | Nudt13    |
| ENSMUSG000000034297 | 1281.616  | 0.756 | 0.147 | 5.149  | 2.6E-07 | 1.778E-06  | Med13     |
| ENSMUSG000000056413 | 1384.762  | 0.756 | 0.276 | 2.740  | 6.2E-03 | 0.02047893 | Adap1     |
| ENSMUSG000000028613 | 956.687   | 0.755 | 0.204 | 3.695  | 2.2E-04 | 0.00098398 | Lrp8      |
| ENSMUSG000000035152 | 3786.463  | 0.754 | 0.073 | 10.276 | 9.0E-25 | 2.0519E-23 | Ap2b1     |
| ENSMUSG000000046908 | 2121.617  | 0.754 | 0.134 | 5.620  | 1.9E-08 | 1.4823E-07 | Ltb4r1    |
| ENSMUSG000000021972 | 1044.376  | 0.754 | 0.148 | 5.112  | 3.2E-07 | 2.132E-06  | Hmbox1    |
| ENSMUSG000000028382 | 8750.748  | 0.754 | 0.093 | 8.115  | 4.9E-16 | 6.9115E-15 | Ptbp3     |
| ENSMUSG000000068758 | 3047.359  | 0.754 | 0.144 | 5.251  | 1.5E-07 | 1.0595E-06 | Il3ra     |
| ENSMUSG000000003062 | 9424.346  | 0.754 | 0.106 | 7.134  | 9.7E-13 | 1.0956E-11 | Stard3nl  |
| ENSMUSG000000109905 | 65.460    | 0.753 | 0.286 | 2.631  | 8.5E-03 | 0.02720196 | Gm7380    |
| ENSMUSG000000026202 | 8662.020  | 0.753 | 0.141 | 5.339  | 9.3E-08 | 6.6934E-07 | Tuba4a    |
| ENSMUSG000000029624 | 1133.999  | 0.752 | 0.178 | 4.228  | 2.4E-05 | 0.00012342 | Ptcd1     |
| ENSMUSG000000042613 | 2385.416  | 0.752 | 0.120 | 6.283  | 3.3E-10 | 3.0611E-09 | Pbxip1    |
| ENSMUSG000000044734 | 1556.115  | 0.752 | 0.214 | 3.515  | 4.4E-04 | 0.00186641 | Serpinb1a |
| ENSMUSG000000078965 | 124.172   | 0.752 | 0.299 | 2.512  | 1.2E-02 | 0.03680632 | Gm12033   |
| ENSMUSG000000058594 | 3050.199  | 0.752 | 0.147 | 5.117  | 3.1E-07 | 2.0769E-06 | Fbh1      |
| ENSMUSG000000005610 | 51406.656 | 0.752 | 0.105 | 7.180  | 7.0E-13 | 7.9773E-12 | Eif4g2    |
| ENSMUSG000000020536 | 2067.854  | 0.751 | 0.135 | 5.554  | 2.8E-08 | 2.1286E-07 | Llg11     |
| ENSMUSG000000029110 | 9653.069  | 0.751 | 0.082 | 9.107  | 8.5E-20 | 1.5175E-18 | Rnf4      |
| ENSMUSG000000015755 | 4788.131  | 0.749 | 0.128 | 5.870  | 4.4E-09 | 3.6152E-08 | Tab2      |
| ENSMUSG000000021930 | 7377.081  | 0.749 | 0.097 | 7.725  | 1.1E-14 | 1.4442E-13 | Spryd7    |
| ENSMUSG000000042351 | 205.529   | 0.748 | 0.260 | 2.876  | 4.0E-03 | 0.01402285 | Grap2     |
| ENSMUSG000000037885 | 650.326   | 0.747 | 0.213 | 3.514  | 4.4E-04 | 0.00187201 | Stk35     |



|                    |           |       |       |        |         |            |          |
|--------------------|-----------|-------|-------|--------|---------|------------|----------|
| ENSMUSG00000075705 | 7614.031  | 0.747 | 0.108 | 6.905  | 5.0E-12 | 5.3428E-11 | Msrb1    |
| ENSMUSG00000025793 | 8341.368  | 0.747 | 0.114 | 6.542  | 6.1E-11 | 5.9259E-10 | Hgs      |
| ENSMUSG00000028920 | 3408.933  | 0.746 | 0.128 | 5.827  | 5.6E-09 | 4.6193E-08 | Fbxo42   |
| ENSMUSG00000025779 | 2501.840  | 0.746 | 0.102 | 7.298  | 2.9E-13 | 3.4462E-12 | Ly96     |
| ENSMUSG00000033124 | 1044.799  | 0.746 | 0.144 | 5.167  | 2.4E-07 | 1.6241E-06 | Atg9a    |
| ENSMUSG00000059810 | 682.610   | 0.746 | 0.165 | 4.535  | 5.8E-06 | 3.2982E-05 | Rgs3     |
| ENSMUSG00000032745 | 2166.705  | 0.745 | 0.074 | 10.099 | 5.6E-24 | 1.2315E-22 | Gpbp1    |
| ENSMUSG00000024030 | 20569.071 | 0.745 | 0.159 | 4.676  | 2.9E-06 | 1.7395E-05 | Abcg1    |
| ENSMUSG00000033916 | 11004.430 | 0.745 | 0.068 | 10.879 | 1.4E-27 | 3.6774E-26 | Chmp2a   |
| ENSMUSG00000054277 | 2410.693  | 0.744 | 0.113 | 6.581  | 4.7E-11 | 4.5866E-10 | Arfgap3  |
| ENSMUSG00000040152 | 49909.819 | 0.743 | 0.117 | 6.330  | 2.4E-10 | 2.2797E-09 | Thbs1    |
| ENSMUSG00000038342 | 2913.048  | 0.743 | 0.108 | 6.908  | 4.9E-12 | 5.2501E-11 | Mlxip    |
| ENSMUSG00000021994 | 1473.249  | 0.743 | 0.235 | 3.157  | 1.6E-03 | 0.0060894  | Wnt5a    |
| ENSMUSG00000041926 | 17613.676 | 0.743 | 0.070 | 10.678 | 1.3E-26 | 3.1404E-25 | Rnpep    |
| ENSMUSG00000067321 | 86.084    | 0.741 | 0.291 | 2.549  | 1.1E-02 | 0.03345364 | Gm7931   |
| ENSMUSG00000021270 | 7731.916  | 0.741 | 0.096 | 7.733  | 1.1E-14 | 1.3613E-13 | Hsp90aa1 |
| ENSMUSG00000023456 | 35178.518 | 0.740 | 0.071 | 10.451 | 1.4E-25 | 3.3734E-24 | Tpi1     |
| ENSMUSG00000032434 | 13098.605 | 0.739 | 0.121 | 6.108  | 1.0E-09 | 8.8771E-09 | Cmtm6    |
| ENSMUSG00000004096 | 6834.245  | 0.739 | 0.082 | 8.975  | 2.8E-19 | 4.9391E-18 | Cwc15    |
| ENSMUSG00000029470 | 22881.777 | 0.739 | 0.110 | 6.726  | 1.7E-11 | 1.7742E-10 | P2rx4    |
| ENSMUSG00000029775 | 871.893   | 0.739 | 0.137 | 5.372  | 7.8E-08 | 5.6269E-07 | Klhdc10  |
| ENSMUSG00000022514 | 760.664   | 0.737 | 0.165 | 4.470  | 7.8E-06 | 4.4121E-05 | Il1rap   |
| ENSMUSG00000044768 | 6155.645  | 0.736 | 0.123 | 5.967  | 2.4E-09 | 2.0426E-08 | Macir    |
| ENSMUSG00000024816 | 6793.367  | 0.735 | 0.102 | 7.180  | 7.0E-13 | 7.9882E-12 | FrmD8    |
| ENSMUSG00000070713 | 132.000   | 0.735 | 0.282 | 2.603  | 9.2E-03 | 0.02914386 | Gm10282  |
| ENSMUSG00000043008 | 1923.189  | 0.734 | 0.168 | 4.379  | 1.2E-05 | 6.5165E-05 | Klh16    |
| ENSMUSG00000062210 | 6991.742  | 0.734 | 0.068 | 10.831 | 2.5E-27 | 6.1682E-26 | Tnfaip8  |
| ENSMUSG00000031753 | 2484.110  | 0.734 | 0.122 | 5.995  | 2.0E-09 | 1.7373E-08 | Cog4     |
| ENSMUSG00000037820 | 31176.575 | 0.734 | 0.082 | 8.898  | 5.7E-19 | 9.7327E-18 | Tgm2     |
| ENSMUSG00000029923 | 316.817   | 0.733 | 0.301 | 2.436  | 1.5E-02 | 0.0442971  | Rab19    |
| ENSMUSG00000059995 | 1518.312  | 0.733 | 0.188 | 3.900  | 9.6E-05 | 0.00045775 | Atxn713  |
| ENSMUSG00000040850 | 1648.927  | 0.733 | 0.147 | 4.990  | 6.0E-07 | 3.8929E-06 | Psme4    |
| ENSMUSG00000037720 | 4090.243  | 0.733 | 0.076 | 9.685  | 3.5E-22 | 7.0366E-21 | Tmem33   |
| ENSMUSG00000042502 | 2476.987  | 0.732 | 0.088 | 8.320  | 8.8E-17 | 1.3142E-15 | Cd2bp2   |
| ENSMUSG00000018599 | 1216.434  | 0.732 | 0.211 | 3.471  | 5.2E-04 | 0.00216975 | Mief2    |
| ENSMUSG00000061689 | 7604.205  | 0.731 | 0.091 | 7.991  | 1.3E-15 | 1.8462E-14 | Dlgap4   |
| ENSMUSG00000021036 | 10244.232 | 0.731 | 0.084 | 8.750  | 2.1E-18 | 3.5406E-17 | Sptlc2   |
| ENSMUSG00000053334 | 858.351   | 0.731 | 0.182 | 4.004  | 6.2E-05 | 0.00030657 | Ficd     |
| ENSMUSG00000090946 | 4612.535  | 0.729 | 0.190 | 3.829  | 1.3E-04 | 0.0006005  | Ccdc711  |
| ENSMUSG00000073405 | 180.735   | 0.729 | 0.277 | 2.635  | 8.4E-03 | 0.02690173 | H2-T-ps  |
| ENSMUSG00000026547 | 43020.003 | 0.728 | 0.085 | 8.555  | 1.2E-17 | 1.8725E-16 | Tagln2   |
| ENSMUSG00000029152 | 10509.492 | 0.728 | 0.094 | 7.709  | 1.3E-14 | 1.6363E-13 | Ociad1   |
| ENSMUSG00000041231 | 727.398   | 0.728 | 0.169 | 4.298  | 1.7E-05 | 9.1979E-05 | Ublcp1   |
| ENSMUSG00000021987 | 7400.824  | 0.726 | 0.092 | 7.885  | 3.1E-15 | 4.2115E-14 | Mtmr6    |
| ENSMUSG00000032575 | 4958.714  | 0.725 | 0.079 | 9.240  | 2.5E-20 | 4.5361E-19 | Manf     |
| ENSMUSG00000032041 | 1590.276  | 0.725 | 0.122 | 5.931  | 3.0E-09 | 2.5395E-08 | Tirap    |
| ENSMUSG00000019794 | 2450.274  | 0.725 | 0.121 | 5.984  | 2.2E-09 | 1.8525E-08 | Katna1   |
| ENSMUSG00000022889 | 2877.829  | 0.724 | 0.104 | 6.940  | 3.9E-12 | 4.2453E-11 | Mrpl39   |
| ENSMUSG00000027293 | 34551.960 | 0.724 | 0.114 | 6.336  | 2.4E-10 | 2.1984E-09 | Ehd4     |
| ENSMUSG00000024054 | 3059.063  | 0.723 | 0.129 | 5.592  | 2.2E-08 | 1.7246E-07 | Smchd1   |
| ENSMUSG00000008859 | 7087.633  | 0.723 | 0.083 | 8.754  | 2.1E-18 | 3.4116E-17 | Rala     |
| ENSMUSG00000010392 | 2259.431  | 0.723 | 0.121 | 5.975  | 2.3E-09 | 1.961E-08  | Gosr1    |

|                    |           |       |       |       |         |            |           |
|--------------------|-----------|-------|-------|-------|---------|------------|-----------|
| ENSMUSG00000026185 | 402.662   | 0.723 | 0.265 | 2.731 | 6.3E-03 | 0.02095136 | Igfbp5    |
| ENSMUSG00000086763 | 444.860   | 0.723 | 0.270 | 2.672 | 7.5E-03 | 0.02445852 | Plxna4os1 |
| ENSMUSG00000025747 | 1465.137  | 0.722 | 0.150 | 4.819 | 1.4E-06 | 8.8957E-06 | Tyms      |
| ENSMUSG00000022723 | 594.313   | 0.721 | 0.164 | 4.401 | 1.1E-05 | 5.9353E-05 | Crybg3    |
| ENSMUSG00000042203 | 950.476   | 0.721 | 0.185 | 3.904 | 9.4E-05 | 0.00044978 | Tbc1d22b  |
| ENSMUSG00000090958 | 3322.777  | 0.720 | 0.120 | 5.981 | 2.2E-09 | 1.8854E-08 | Lrrc32    |
| ENSMUSG00000032560 | 2321.011  | 0.719 | 0.160 | 4.502 | 6.7E-06 | 3.8192E-05 | Dnajc13   |
| ENSMUSG00000073647 | 118.116   | 0.719 | 0.242 | 2.970 | 3.0E-03 | 0.01072728 | Gm10557   |
| ENSMUSG00000002210 | 3491.899  | 0.719 | 0.104 | 6.885 | 5.8E-12 | 6.1245E-11 | Smg9      |
| ENSMUSG00000021993 | 835.027   | 0.718 | 0.202 | 3.560 | 3.7E-04 | 0.00159533 | Mipep     |
| ENSMUSG00000096617 | 1088.578  | 0.717 | 0.169 | 4.252 | 2.1E-05 | 0.00011161 | Gm5559    |
| ENSMUSG00000020349 | 12890.492 | 0.717 | 0.127 | 5.644 | 1.7E-08 | 1.2977E-07 | Ppp2ca    |
| ENSMUSG00000036241 | 8269.824  | 0.715 | 0.107 | 6.664 | 2.7E-11 | 2.6827E-10 | Ube2r2    |
| ENSMUSG00000020576 | 742.205   | 0.715 | 0.183 | 3.910 | 9.2E-05 | 0.00044063 | Nbas      |
| ENSMUSG00000079523 | 20791.165 | 0.715 | 0.138 | 5.171 | 2.3E-07 | 1.5902E-06 | Tmsb10    |
| ENSMUSG00000052310 | 24204.092 | 0.715 | 0.117 | 6.096 | 1.1E-09 | 9.5519E-09 | Slc39a1   |
| ENSMUSG00000034748 | 1734.716  | 0.712 | 0.125 | 5.693 | 1.2E-08 | 9.8628E-08 | Sirt6     |
| ENSMUSG00000014195 | 4365.420  | 0.712 | 0.085 | 8.376 | 5.5E-17 | 8.2895E-16 | Dnajc7    |
| ENSMUSG00000021115 | 2267.080  | 0.711 | 0.114 | 6.217 | 5.1E-10 | 4.5689E-09 | Vrk1      |
| ENSMUSG00000048865 | 6964.741  | 0.711 | 0.099 | 7.162 | 7.9E-13 | 9.0161E-12 | Arhgap30  |
| ENSMUSG00000034445 | 2216.547  | 0.711 | 0.095 | 7.509 | 6.0E-14 | 7.3795E-13 | Cyb561a3  |
| ENSMUSG00000070808 | 1072.059  | 0.711 | 0.222 | 3.199 | 1.4E-03 | 0.00531894 | Bicra     |
| ENSMUSG00000031709 | 826.453   | 0.710 | 0.212 | 3.354 | 8.0E-04 | 0.00321986 | Tbc1d9    |
| ENSMUSG00000030654 | 26821.620 | 0.710 | 0.089 | 7.950 | 1.9E-15 | 2.5302E-14 | Arl6ip1   |
| ENSMUSG00000057522 | 10307.955 | 0.710 | 0.091 | 7.796 | 6.4E-15 | 8.3391E-14 | Spop      |
| ENSMUSG00000004070 | 6942.203  | 0.709 | 0.113 | 6.253 | 4.0E-10 | 3.6794E-09 | Hmxo2     |
| ENSMUSG00000033075 | 1691.864  | 0.709 | 0.103 | 6.913 | 4.7E-12 | 5.0601E-11 | Senp1     |
| ENSMUSG00000028245 | 2205.493  | 0.708 | 0.128 | 5.531 | 3.2E-08 | 2.4119E-07 | Nsmaf     |
| ENSMUSG00000038387 | 2442.492  | 0.707 | 0.111 | 6.362 | 2.0E-10 | 1.8709E-09 | Rras      |
| ENSMUSG00000021807 | 5479.899  | 0.707 | 0.091 | 7.735 | 1.0E-14 | 1.3405E-13 | Rtraf     |
| ENSMUSG00000046027 | 3133.512  | 0.707 | 0.113 | 6.230 | 4.7E-10 | 4.2208E-09 | Stard5    |
| ENSMUSG00000008384 | 4620.772  | 0.706 | 0.134 | 5.282 | 1.3E-07 | 9.033E-07  | Sertad1   |
| ENSMUSG00000060475 | 7710.479  | 0.706 | 0.098 | 7.170 | 7.5E-13 | 8.5568E-12 | Wtap      |
| ENSMUSG00000010095 | 35458.924 | 0.706 | 0.084 | 8.435 | 3.3E-17 | 5.0783E-16 | Slc3a2    |
| ENSMUSG00000020124 | 4810.735  | 0.705 | 0.113 | 6.253 | 4.0E-10 | 3.6853E-09 | Usp15     |
| ENSMUSG00000034158 | 13842.865 | 0.705 | 0.113 | 6.250 | 4.1E-10 | 3.7352E-09 | Lrrc58    |
| ENSMUSG00000045573 | 622.159   | 0.704 | 0.262 | 2.691 | 7.1E-03 | 0.02328784 | Penk      |
| ENSMUSG00000062070 | 6048.290  | 0.704 | 0.075 | 9.414 | 4.8E-21 | 9.175E-20  | Pgk1      |
| ENSMUSG00000042121 | 2146.458  | 0.702 | 0.123 | 5.725 | 1.0E-08 | 8.2353E-08 | Ssh1      |
| ENSMUSG00000044864 | 1967.573  | 0.701 | 0.150 | 4.677 | 2.9E-06 | 1.7323E-05 | Ankrd50   |
| ENSMUSG00000063550 | 4294.258  | 0.701 | 0.111 | 6.341 | 2.3E-10 | 2.1392E-09 | Nup98     |
| ENSMUSG00000041241 | 2994.874  | 0.701 | 0.112 | 6.276 | 3.5E-10 | 3.1928E-09 | Mul1      |
| ENSMUSG00000026784 | 537.766   | 0.701 | 0.210 | 3.343 | 8.3E-04 | 0.00334153 | Pdss1     |
| ENSMUSG00000001774 | 4780.752  | 0.700 | 0.085 | 8.196 | 2.5E-16 | 3.5993E-15 | Chordc1   |
| ENSMUSG00000031548 | 1587.189  | 0.700 | 0.264 | 2.651 | 8.0E-03 | 0.02582239 | Sfrp1     |
| ENSMUSG00000031309 | 730.792   | 0.700 | 0.226 | 3.096 | 2.0E-03 | 0.00734498 | Rps6ka3   |
| ENSMUSG00000059923 | 16462.104 | 0.699 | 0.089 | 7.891 | 3.0E-15 | 4.0228E-14 | Grb2      |
| ENSMUSG00000031862 | 5538.300  | 0.698 | 0.118 | 5.919 | 3.2E-09 | 2.7231E-08 | Atp13a1   |
| ENSMUSG00000027496 | 1306.726  | 0.698 | 0.128 | 5.447 | 5.1E-08 | 3.7743E-07 | Aurka     |
| ENSMUSG00000052534 | 559.203   | 0.697 | 0.223 | 3.131 | 1.7E-03 | 0.0065922  | Pbx1      |
| ENSMUSG00000034220 | 7209.495  | 0.697 | 0.095 | 7.329 | 2.3E-13 | 2.7626E-12 | Gpc1      |
| ENSMUSG00000022641 | 3581.719  | 0.696 | 0.138 | 5.046 | 4.5E-07 | 2.9595E-06 | Bbx       |

|                     |            |       |       |        |         |            |          |
|---------------------|------------|-------|-------|--------|---------|------------|----------|
| ENSMUSG00000022237  | 2014.908   | 0.696 | 0.146 | 4.783  | 1.7E-06 | 1.0588E-05 | Ankrd33b |
| ENSMUSG00000020745  | 10413.219  | 0.696 | 0.065 | 10.732 | 7.2E-27 | 1.7693E-25 | Pafah1b1 |
| ENSMUSG00000036057  | 1028.882   | 0.695 | 0.130 | 5.348  | 8.9E-08 | 6.4052E-07 | Ptpn23   |
| ENSMUSG00000020647  | 1764.342   | 0.695 | 0.151 | 4.592  | 4.4E-06 | 2.5548E-05 | Ncoa1    |
| ENSMUSG000000112023 | 34027.800  | 0.695 | 0.090 | 7.716  | 1.2E-14 | 1.5499E-13 | Lilr4b   |
| ENSMUSG00000066900  | 5295.646   | 0.694 | 0.126 | 5.497  | 3.9E-08 | 2.8957E-07 | Suds3    |
| ENSMUSG00000024563  | 3700.232   | 0.694 | 0.115 | 6.027  | 1.7E-09 | 1.4442E-08 | Smad2    |
| ENSMUSG00000039804  | 2404.404   | 0.694 | 0.152 | 4.573  | 4.8E-06 | 2.7812E-05 | Ncoa5    |
| ENSMUSG00000024960  | 2538.960   | 0.693 | 0.155 | 4.460  | 8.2E-06 | 4.603E-05  | Plcb3    |
| ENSMUSG00000029131  | 2879.362   | 0.693 | 0.088 | 7.853  | 4.1E-15 | 5.4102E-14 | Dnajb6   |
| ENSMUSG00000029287  | 366.514    | 0.692 | 0.220 | 3.141  | 1.7E-03 | 0.00639206 | Tgfb3    |
| ENSMUSG00000024807  | 6748.025   | 0.692 | 0.092 | 7.540  | 4.7E-14 | 5.857E-13  | Syvn1    |
| ENSMUSG00000035596  | 4026.832   | 0.691 | 0.122 | 5.685  | 1.3E-08 | 1.028E-07  | Mboat7   |
| ENSMUSG00000045658  | 20844.298  | 0.691 | 0.121 | 5.686  | 1.3E-08 | 1.0216E-07 | Pid1     |
| ENSMUSG00000023913  | 37295.655  | 0.689 | 0.075 | 9.234  | 2.6E-20 | 4.7759E-19 | Pla2g7   |
| ENSMUSG00000015837  | 126416.486 | 0.689 | 0.118 | 5.840  | 5.2E-09 | 4.2872E-08 | Sqstm1   |
| ENSMUSG00000041229  | 889.401    | 0.689 | 0.132 | 5.219  | 1.8E-07 | 1.2463E-06 | Phf8     |
| ENSMUSG00000021453  | 10035.419  | 0.688 | 0.119 | 5.774  | 7.8E-09 | 6.2533E-08 | Gadd45g  |
| ENSMUSG00000052248  | 1538.745   | 0.688 | 0.170 | 4.049  | 5.1E-05 | 0.0002561  | Zeb2os   |
| ENSMUSG00000032643  | 2627.690   | 0.687 | 0.166 | 4.146  | 3.4E-05 | 0.00017231 | Fhl3     |
| ENSMUSG00000028439  | 1283.595   | 0.686 | 0.141 | 4.852  | 1.2E-06 | 7.6137E-06 | Fam219a  |
| ENSMUSG00000020152  | 31844.281  | 0.686 | 0.094 | 7.269  | 3.6E-13 | 4.25E-12   | Actr2    |
| ENSMUSG00000020952  | 4349.118   | 0.686 | 0.096 | 7.178  | 7.1E-13 | 8.086E-12  | Scfd1    |
| ENSMUSG00000048277  | 11496.997  | 0.685 | 0.075 | 9.098  | 9.2E-20 | 1.6348E-18 | Syngn2   |
| ENSMUSG00000019971  | 527.800    | 0.685 | 0.222 | 3.086  | 2.0E-03 | 0.00757923 | Cep290   |
| ENSMUSG00000040314  | 2293.239   | 0.685 | 0.126 | 5.417  | 6.0E-08 | 4.436E-07  | Ctsg     |
| ENSMUSG00000019923  | 5492.866   | 0.685 | 0.085 | 8.040  | 9.0E-16 | 1.2564E-14 | Zwint    |
| ENSMUSG00000024642  | 1109.102   | 0.684 | 0.189 | 3.616  | 3.0E-04 | 0.00131072 | Tle4     |
| ENSMUSG00000029505  | 3881.270   | 0.684 | 0.091 | 7.553  | 4.3E-14 | 5.3203E-13 | Ep400    |
| ENSMUSG00000040552  | 79234.174  | 0.684 | 0.153 | 4.460  | 8.2E-06 | 4.6079E-05 | C3ar1    |
| ENSMUSG00000000276  | 546.162    | 0.683 | 0.240 | 2.845  | 4.4E-03 | 0.01535704 | Dgke     |
| ENSMUSG00000022801  | 997.032    | 0.682 | 0.146 | 4.686  | 2.8E-06 | 1.6605E-05 | Lrch3    |
| ENSMUSG00000022893  | 831.599    | 0.682 | 0.153 | 4.447  | 8.7E-06 | 4.8632E-05 | Adamts1  |
| ENSMUSG00000025044  | 23402.247  | 0.682 | 0.132 | 5.170  | 2.3E-07 | 1.5953E-06 | Msr1     |
| ENSMUSG00000020205  | 1383.660   | 0.681 | 0.105 | 6.474  | 9.5E-11 | 9.1651E-10 | Phlda1   |
| ENSMUSG00000034311  | 326.878    | 0.681 | 0.248 | 2.740  | 6.1E-03 | 0.02044088 | Kif4     |
| ENSMUSG00000063439  | 1344.952   | 0.680 | 0.150 | 4.537  | 5.7E-06 | 3.2625E-05 | B9d2     |
| ENSMUSG00000002897  | 7722.133   | 0.680 | 0.092 | 7.375  | 1.6E-13 | 1.9824E-12 | Il17ra   |
| ENSMUSG00000038260  | 706.826    | 0.680 | 0.189 | 3.601  | 3.2E-04 | 0.00138269 | Trpm4    |
| ENSMUSG00000014601  | 3421.221   | 0.679 | 0.132 | 5.125  | 3.0E-07 | 2.0014E-06 | Strip1   |
| ENSMUSG00000020366  | 3226.144   | 0.679 | 0.118 | 5.757  | 8.5E-09 | 6.8676E-08 | Mapk9    |
| ENSMUSG00000034484  | 15983.318  | 0.678 | 0.118 | 5.754  | 8.7E-09 | 6.9882E-08 | Snx2     |
| ENSMUSG00000024847  | 4766.123   | 0.678 | 0.084 | 8.024  | 1.0E-15 | 1.4247E-14 | Aip      |
| ENSMUSG00000096255  | 234.450    | 0.678 | 0.196 | 3.456  | 5.5E-04 | 0.00228175 | Dynlt1b  |
| ENSMUSG00000060860  | 2532.241   | 0.677 | 0.113 | 6.005  | 1.9E-09 | 1.6394E-08 | Ube2s    |
| ENSMUSG00000027379  | 400.655    | 0.677 | 0.225 | 3.013  | 2.6E-03 | 0.00945547 | Bub1     |
| ENSMUSG00000017831  | 5852.341   | 0.677 | 0.100 | 6.758  | 1.4E-11 | 1.4381E-10 | Rab5a    |
| ENSMUSG00000030726  | 2725.972   | 0.677 | 0.104 | 6.501  | 8.0E-11 | 7.7013E-10 | Pold3    |
| ENSMUSG00000034111  | 392.414    | 0.676 | 0.231 | 2.926  | 3.4E-03 | 0.01218067 | Tmed8    |
| ENSMUSG00000050965  | 733.650    | 0.676 | 0.209 | 3.237  | 1.2E-03 | 0.00471629 | Prkca    |
| ENSMUSG00000073412  | 8260.485   | 0.676 | 0.134 | 5.052  | 4.4E-07 | 2.8725E-06 | Lst1     |
| ENSMUSG00000034850  | 6505.710   | 0.675 | 0.110 | 6.128  | 8.9E-10 | 7.8973E-09 | Tmem127  |

|                    |           |       |       |       |         |            |               |
|--------------------|-----------|-------|-------|-------|---------|------------|---------------|
| ENSMUSG00000029291 | 5292.172  | 0.675 | 0.116 | 5.795 | 6.8E-09 | 5.5312E-08 | Rufy3         |
| ENSMUSG00000084124 | 85.639    | 0.674 | 0.279 | 2.417 | 1.6E-02 | 0.0463924  | Gm13588       |
| ENSMUSG00000038324 | 9487.890  | 0.674 | 0.102 | 6.586 | 4.5E-11 | 4.4674E-10 | Trpc4ap       |
| ENSMUSG00000073987 | 4998.700  | 0.673 | 0.081 | 8.353 | 6.7E-17 | 1.0038E-15 | Ggh           |
| ENSMUSG00000005575 | 9258.263  | 0.673 | 0.178 | 3.791 | 1.5E-04 | 0.00069336 | Ube2m         |
| ENSMUSG00000034206 | 206.078   | 0.673 | 0.208 | 3.242 | 1.2E-03 | 0.00464639 | Polq          |
| ENSMUSG00000067017 | 374.653   | 0.673 | 0.160 | 4.199 | 2.7E-05 | 0.00013899 | Capza1-ps1    |
| ENSMUSG00000055435 | 19662.138 | 0.673 | 0.138 | 4.888 | 1.0E-06 | 6.404E-06  | Maf           |
| ENSMUSG00000085148 | 3030.832  | 0.673 | 0.111 | 6.082 | 1.2E-09 | 1.0369E-08 | Mir22hg       |
| ENSMUSG00000051853 | 8884.259  | 0.672 | 0.129 | 5.203 | 2.0E-07 | 1.3457E-06 | Arf3          |
| ENSMUSG00000021598 | 5571.852  | 0.672 | 0.099 | 6.806 | 1.0E-11 | 1.0392E-10 | Med10         |
| ENSMUSG00000020184 | 16463.367 | 0.672 | 0.110 | 6.116 | 9.6E-10 | 8.4827E-09 | Mdm2          |
| ENSMUSG00000026475 | 2071.575  | 0.672 | 0.180 | 3.734 | 1.9E-04 | 0.00085616 | Rgs16         |
| ENSMUSG00000037544 | 458.660   | 0.672 | 0.206 | 3.267 | 1.1E-03 | 0.0042801  | Dlgap5        |
| ENSMUSG00000058240 | 1627.920  | 0.672 | 0.106 | 6.326 | 2.5E-10 | 2.3347E-09 | Cryz11        |
| ENSMUSG00000029178 | 5381.327  | 0.671 | 0.098 | 6.858 | 7.0E-12 | 7.3342E-11 | Klf3          |
| ENSMUSG00000030067 | 7134.524  | 0.671 | 0.118 | 5.700 | 1.2E-08 | 9.4894E-08 | Foxp1         |
| ENSMUSG00000062995 | 410.832   | 0.671 | 0.267 | 2.515 | 1.2E-02 | 0.03647239 | Ica1          |
| ENSMUSG00000022507 | 2769.125  | 0.670 | 0.135 | 4.969 | 6.7E-07 | 4.3103E-06 | 1810013L24Rik |
| ENSMUSG00000027522 | 1364.288  | 0.670 | 0.140 | 4.777 | 1.8E-06 | 1.0852E-05 | Stx16         |
| ENSMUSG00000111394 | 397.112   | 0.670 | 0.211 | 3.176 | 1.5E-03 | 0.00573548 | Gm49759       |
| ENSMUSG00000015396 | 8733.886  | 0.669 | 0.188 | 3.552 | 3.8E-04 | 0.00164336 | Cd83          |
| ENSMUSG00000013973 | 102.750   | 0.669 | 0.277 | 2.418 | 1.6E-02 | 0.04622595 | Dedd          |
| ENSMUSG00000105586 | 418.505   | 0.669 | 0.280 | 2.388 | 1.7E-02 | 0.04969834 | Gm43009       |
| ENSMUSG00000050310 | 966.228   | 0.668 | 0.155 | 4.309 | 1.6E-05 | 8.8009E-05 | Rictor        |
| ENSMUSG00000041431 | 1231.327  | 0.668 | 0.152 | 4.408 | 1.0E-05 | 5.7488E-05 | Ccnb1         |
| ENSMUSG00000018559 | 4999.519  | 0.667 | 0.105 | 6.355 | 2.1E-10 | 1.9547E-09 | Ctdnep1       |
| ENSMUSG00000057649 | 1851.321  | 0.667 | 0.132 | 5.067 | 4.0E-07 | 2.6575E-06 | Brd9          |
| ENSMUSG00000030268 | 1060.331  | 0.667 | 0.176 | 3.797 | 1.5E-04 | 0.00067899 | Bcat1         |
| ENSMUSG00000028792 | 9650.695  | 0.666 | 0.088 | 7.529 | 5.1E-14 | 6.3586E-13 | Ak2           |
| ENSMUSG00000022816 | 10382.832 | 0.666 | 0.135 | 4.927 | 8.4E-07 | 5.3067E-06 | Fst11         |
| ENSMUSG00000042842 | 424.030   | 0.665 | 0.253 | 2.629 | 8.6E-03 | 0.02735455 | Serpnb6b      |
| ENSMUSG00000081021 | 128.073   | 0.664 | 0.218 | 3.052 | 2.3E-03 | 0.00839181 | Gm11964       |
| ENSMUSG00000017631 | 12820.061 | 0.664 | 0.102 | 6.532 | 6.5E-11 | 6.2944E-10 | Abr           |
| ENSMUSG00000023186 | 7259.447  | 0.664 | 0.148 | 4.493 | 7.0E-06 | 3.9813E-05 | Vwa5a         |
| ENSMUSG00000020212 | 606.210   | 0.663 | 0.222 | 2.987 | 2.8E-03 | 0.01020737 | Mdm1          |
| ENSMUSG00000061665 | 1881.643  | 0.663 | 0.120 | 5.502 | 3.7E-08 | 2.8144E-07 | Cd2ap         |
| ENSMUSG00000010406 | 5266.937  | 0.663 | 0.116 | 5.706 | 1.2E-08 | 9.178E-08  | Mrp152        |
| ENSMUSG00000026880 | 4906.697  | 0.662 | 0.130 | 5.077 | 3.8E-07 | 2.537E-06  | Stom          |
| ENSMUSG00000020869 | 19644.203 | 0.662 | 0.087 | 7.576 | 3.6E-14 | 4.4582E-13 | Lrrc59        |
| ENSMUSG00000004931 | 3294.699  | 0.661 | 0.125 | 5.284 | 1.3E-07 | 8.9219E-07 | Apba3         |
| ENSMUSG00000048164 | 1126.290  | 0.661 | 0.124 | 5.315 | 1.1E-07 | 7.5898E-07 | Gm7204        |
| ENSMUSG00000004631 | 268.471   | 0.661 | 0.249 | 2.659 | 7.8E-03 | 0.02528956 | Sgce          |
| ENSMUSG00000093826 | 91.608    | 0.660 | 0.232 | 2.840 | 4.5E-03 | 0.01556598 | Gm6900        |
| ENSMUSG00000042659 | 2988.956  | 0.660 | 0.123 | 5.373 | 7.7E-08 | 5.5981E-07 | Arrdc4        |
| ENSMUSG00000026315 | 2730.697  | 0.660 | 0.216 | 3.051 | 2.3E-03 | 0.00841363 | Serpnb8       |
| ENSMUSG00000002489 | 401.649   | 0.660 | 0.163 | 4.037 | 5.4E-05 | 0.0002686  | Tiam1         |
| ENSMUSG00000024969 | 4324.731  | 0.659 | 0.103 | 6.394 | 1.6E-10 | 1.5321E-09 | Mark2         |
| ENSMUSG00000027433 | 7602.909  | 0.659 | 0.097 | 6.766 | 1.3E-11 | 1.3623E-10 | Xrn2          |
| ENSMUSG00000024069 | 2096.080  | 0.659 | 0.113 | 5.809 | 6.3E-09 | 5.1094E-08 | Slc30a6       |
| ENSMUSG00000020610 | 2113.934  | 0.659 | 0.123 | 5.357 | 8.5E-08 | 6.09E-07   | Amz2          |
| ENSMUSG00000049550 | 3178.491  | 0.658 | 0.113 | 5.844 | 5.1E-09 | 4.1886E-08 | Clip1         |

|                    |           |       |       |       |         |            |          |
|--------------------|-----------|-------|-------|-------|---------|------------|----------|
| ENSMUSG00000018604 | 336.894   | 0.658 | 0.217 | 3.037 | 2.4E-03 | 0.0087892  | Tbx3     |
| ENSMUSG00000020132 | 3479.164  | 0.657 | 0.147 | 4.460 | 8.2E-06 | 4.6054E-05 | Rab21    |
| ENSMUSG00000006906 | 1743.967  | 0.657 | 0.151 | 4.351 | 1.4E-05 | 7.3618E-05 | Stambp   |
| ENSMUSG00000030232 | 2026.668  | 0.656 | 0.128 | 5.143 | 2.7E-07 | 1.8265E-06 | Aebp2    |
| ENSMUSG00000037020 | 386.387   | 0.656 | 0.225 | 2.918 | 3.5E-03 | 0.01244635 | Wdr62    |
| ENSMUSG00000083899 | 89.727    | 0.655 | 0.248 | 2.642 | 8.2E-03 | 0.02642573 | Gm12346  |
| ENSMUSG00000070953 | 1178.651  | 0.655 | 0.153 | 4.267 | 2.0E-05 | 0.00010503 | Rabepk   |
| ENSMUSG00000023919 | 505.565   | 0.654 | 0.191 | 3.431 | 6.0E-04 | 0.00248363 | Cenpq    |
| ENSMUSG00000030214 | 3304.480  | 0.653 | 0.148 | 4.419 | 9.9E-06 | 5.4999E-05 | Plbd1    |
| ENSMUSG00000085363 | 181.363   | 0.653 | 0.231 | 2.829 | 4.7E-03 | 0.01608434 | Gm15478  |
| ENSMUSG00000024943 | 1393.941  | 0.652 | 0.155 | 4.220 | 2.4E-05 | 0.00012726 | Smc5     |
| ENSMUSG00000022863 | 183.657   | 0.652 | 0.236 | 2.764 | 5.7E-03 | 0.0191578  | Btg3     |
| ENSMUSG00000029003 | 1771.808  | 0.651 | 0.119 | 5.466 | 4.6E-08 | 3.417E-07  | Mad212   |
| ENSMUSG00000084350 | 130.626   | 0.650 | 0.228 | 2.854 | 4.3E-03 | 0.01498186 | Znf41-ps |
| ENSMUSG00000040859 | 1415.822  | 0.650 | 0.152 | 4.280 | 1.9E-05 | 9.9441E-05 | Bsdc1    |
| ENSMUSG00000022180 | 22427.423 | 0.649 | 0.105 | 6.177 | 6.5E-10 | 5.8395E-09 | Slc7a8   |
| ENSMUSG00000001665 | 210.438   | 0.649 | 0.218 | 2.972 | 3.0E-03 | 0.0106603  | Gstt3    |
| ENSMUSG00000000339 | 2645.621  | 0.649 | 0.119 | 5.452 | 5.0E-08 | 3.6875E-07 | Rtca     |
| ENSMUSG00000028538 | 497.769   | 0.648 | 0.205 | 3.170 | 1.5E-03 | 0.00583438 | St3gal3  |
| ENSMUSG00000027340 | 3313.594  | 0.648 | 0.143 | 4.524 | 6.1E-06 | 3.4648E-05 | Slc23a2  |
| ENSMUSG00000017765 | 4025.743  | 0.647 | 0.138 | 4.673 | 3.0E-06 | 1.7655E-05 | Slc12a4  |
| ENSMUSG00000052305 | 542.208   | 0.646 | 0.242 | 2.669 | 7.6E-03 | 0.02466084 | Hbb-bs   |
| ENSMUSG00000078249 | 464.166   | 0.646 | 0.179 | 3.601 | 3.2E-04 | 0.00138057 | Hmgalb   |
| ENSMUSG00000085208 | 1987.586  | 0.646 | 0.134 | 4.827 | 1.4E-06 | 8.5551E-06 | Brip1os  |
| ENSMUSG00000038217 | 308.284   | 0.646 | 0.233 | 2.773 | 5.5E-03 | 0.01870079 | Tlcd2    |
| ENSMUSG00000025001 | 600.842   | 0.645 | 0.169 | 3.818 | 1.3E-04 | 0.00062686 | Hells    |
| ENSMUSG00000028437 | 6460.864  | 0.645 | 0.100 | 6.476 | 9.4E-11 | 9.0608E-10 | Ubap1    |
| ENSMUSG00000027994 | 3267.675  | 0.645 | 0.086 | 7.522 | 5.4E-14 | 6.7181E-13 | Mcub     |
| ENSMUSG00000027828 | 17249.677 | 0.644 | 0.093 | 6.917 | 4.6E-12 | 4.9463E-11 | Ssr3     |
| ENSMUSG00000017421 | 12494.402 | 0.643 | 0.075 | 8.620 | 6.7E-18 | 1.0712E-16 | Zfp207   |
| ENSMUSG00000059182 | 16983.394 | 0.643 | 0.065 | 9.841 | 7.5E-23 | 1.5656E-21 | Skap2    |
| ENSMUSG00000026991 | 916.487   | 0.643 | 0.207 | 3.102 | 1.9E-03 | 0.00721047 | Pkp4     |
| ENSMUSG00000096173 | 96.990    | 0.643 | 0.251 | 2.561 | 1.0E-02 | 0.03245147 | Gm3150   |
| ENSMUSG00000080731 | 317.418   | 0.642 | 0.204 | 3.152 | 1.6E-03 | 0.00617488 | Rps2-ps9 |
| ENSMUSG00000055452 | 180.237   | 0.642 | 0.256 | 2.506 | 1.2E-02 | 0.03729146 | Gm7353   |
| ENSMUSG00000029385 | 3085.111  | 0.642 | 0.146 | 4.387 | 1.2E-05 | 6.311E-05  | Ccng2    |
| ENSMUSG00000061207 | 1851.749  | 0.641 | 0.117 | 5.501 | 3.8E-08 | 2.8387E-07 | Stk19    |
| ENSMUSG00000002814 | 2123.680  | 0.641 | 0.172 | 3.723 | 2.0E-04 | 0.00089047 | Top3a    |
| ENSMUSG00000034075 | 1699.962  | 0.641 | 0.152 | 4.220 | 2.4E-05 | 0.00012735 | Zdhhc5   |
| ENSMUSG00000049047 | 771.076   | 0.641 | 0.126 | 5.069 | 4.0E-07 | 2.6364E-06 | Armex3   |
| ENSMUSG00000000838 | 1535.003  | 0.640 | 0.139 | 4.608 | 4.1E-06 | 2.3832E-05 | Fmr1     |
| ENSMUSG00000036943 | 15188.661 | 0.638 | 0.116 | 5.488 | 4.1E-08 | 3.0315E-07 | Rab8b    |
| ENSMUSG00000024681 | 1426.419  | 0.637 | 0.175 | 3.647 | 2.7E-04 | 0.00117446 | Ms4a3    |
| ENSMUSG00000039308 | 3147.602  | 0.637 | 0.157 | 4.049 | 5.1E-05 | 0.00025611 | Ndst2    |
| ENSMUSG00000028530 | 15030.755 | 0.637 | 0.084 | 7.616 | 2.6E-14 | 3.2967E-13 | Jak1     |
| ENSMUSG00000001473 | 20370.915 | 0.636 | 0.099 | 6.449 | 1.1E-10 | 1.0766E-09 | Tubb6    |
| ENSMUSG00000054843 | 318.517   | 0.636 | 0.238 | 2.678 | 7.4E-03 | 0.0240487  | Atrnl1   |
| ENSMUSG00000092607 | 1482.032  | 0.636 | 0.132 | 4.819 | 1.4E-06 | 8.907E-06  | Scnml    |
| ENSMUSG00000029201 | 5640.532  | 0.636 | 0.101 | 6.299 | 3.0E-10 | 2.7769E-09 | Ugdh     |
| ENSMUSG00000026519 | 2437.496  | 0.636 | 0.101 | 6.298 | 3.0E-10 | 2.7838E-09 | Tmem63a  |
| ENSMUSG00000039316 | 8029.546  | 0.635 | 0.114 | 5.583 | 2.4E-08 | 1.8131E-07 | Rftn1    |
| ENSMUSG00000030528 | 246.692   | 0.635 | 0.254 | 2.501 | 1.2E-02 | 0.03773667 | Blm      |

|                    |           |       |       |        |         |            |           |
|--------------------|-----------|-------|-------|--------|---------|------------|-----------|
| ENSMUSG00000056962 | 2987.266  | 0.635 | 0.085 | 7.440  | 1.0E-13 | 1.2244E-12 | Jmjd6     |
| ENSMUSG00000001089 | 2009.004  | 0.635 | 0.098 | 6.469  | 9.9E-11 | 9.4641E-10 | Luzp1     |
| ENSMUSG00000069919 | 540.225   | 0.635 | 0.198 | 3.205  | 1.4E-03 | 0.00522407 | Hba-a1    |
| ENSMUSG00000062846 | 110.105   | 0.635 | 0.225 | 2.818  | 4.8E-03 | 0.01656181 | Gm14176   |
| ENSMUSG00000004788 | 2956.994  | 0.634 | 0.122 | 5.202  | 2.0E-07 | 1.3533E-06 | Eif2b2    |
| ENSMUSG00000035722 | 1241.835  | 0.634 | 0.145 | 4.373  | 1.2E-05 | 6.7031E-05 | Abca7     |
| ENSMUSG00000042165 | 219.678   | 0.634 | 0.159 | 3.976  | 7.0E-05 | 0.00034109 | Gm9774    |
| ENSMUSG00000036752 | 8614.935  | 0.633 | 0.107 | 5.894  | 3.8E-09 | 3.1359E-08 | Tubb4b    |
| ENSMUSG00000029657 | 3132.613  | 0.633 | 0.128 | 4.941  | 7.8E-07 | 4.9596E-06 | Hsph1     |
| ENSMUSG00000032096 | 7499.212  | 0.632 | 0.081 | 7.853  | 4.1E-15 | 5.4141E-14 | Arcn1     |
| ENSMUSG00000004562 | 703.081   | 0.632 | 0.179 | 3.542  | 4.0E-04 | 0.00169928 | Arhgef40  |
| ENSMUSG00000022724 | 1874.653  | 0.632 | 0.087 | 7.263  | 3.8E-13 | 4.4327E-12 | Riox2     |
| ENSMUSG00000024085 | 1974.286  | 0.632 | 0.138 | 4.586  | 4.5E-06 | 2.6191E-05 | Man2a1    |
| ENSMUSG00000039737 | 1662.260  | 0.631 | 0.114 | 5.550  | 2.8E-08 | 2.1659E-07 | Prkrip1   |
| ENSMUSG00000042178 | 2356.596  | 0.630 | 0.114 | 5.519  | 3.4E-08 | 2.5698E-07 | Armc5     |
| ENSMUSG00000001870 | 3713.255  | 0.630 | 0.101 | 6.256  | 4.0E-10 | 3.6218E-09 | Ltbp1     |
| ENSMUSG00000040747 | 47654.865 | 0.630 | 0.080 | 7.840  | 4.5E-15 | 5.9458E-14 | Cd53      |
| ENSMUSG00000030452 | 3180.900  | 0.629 | 0.099 | 6.345  | 2.2E-10 | 2.0847E-09 | Nipa2     |
| ENSMUSG00000049323 | 1612.751  | 0.628 | 0.140 | 4.505  | 6.6E-06 | 3.7715E-05 | Smcr8     |
| ENSMUSG00000079418 | 531.518   | 0.628 | 0.170 | 3.705  | 2.1E-04 | 0.00095078 | Atg4a     |
| ENSMUSG00000020397 | 2071.068  | 0.628 | 0.108 | 5.795  | 6.8E-09 | 5.5371E-08 | Med7      |
| ENSMUSG00000053477 | 6155.784  | 0.628 | 0.124 | 5.064  | 4.1E-07 | 2.7041E-06 | Tcf4      |
| ENSMUSG00000047423 | 2369.465  | 0.626 | 0.148 | 4.220  | 2.4E-05 | 0.00012753 | AI837181  |
| ENSMUSG00000030220 | 27006.831 | 0.626 | 0.074 | 8.478  | 2.3E-17 | 3.5534E-16 | Arhgdib   |
| ENSMUSG00000029372 | 9012.018  | 0.626 | 0.211 | 2.961  | 3.1E-03 | 0.01100949 | Ppbp      |
| ENSMUSG00000026683 | 413.519   | 0.626 | 0.226 | 2.773  | 5.5E-03 | 0.01870079 | Nuf2      |
| ENSMUSG00000038463 | 1259.471  | 0.625 | 0.179 | 3.487  | 4.9E-04 | 0.00204941 | Olfnl2b   |
| ENSMUSG00000032312 | 11017.401 | 0.625 | 0.092 | 6.810  | 9.8E-12 | 1.0152E-10 | Csk       |
| ENSMUSG00000048701 | 2313.243  | 0.625 | 0.156 | 3.995  | 6.5E-05 | 0.00031708 | Ccde6     |
| ENSMUSG00000024982 | 4912.338  | 0.625 | 0.086 | 7.288  | 3.1E-13 | 3.705E-12  | Zdhhc6    |
| ENSMUSG00000030122 | 17697.254 | 0.625 | 0.113 | 5.519  | 3.4E-08 | 2.5666E-07 | Ptms      |
| ENSMUSG00000027782 | 6553.797  | 0.624 | 0.118 | 5.289  | 1.2E-07 | 8.704E-07  | Kpna4     |
| ENSMUSG00000049493 | 692.656   | 0.624 | 0.261 | 2.396  | 1.7E-02 | 0.04875083 | Pls1      |
| ENSMUSG00000007617 | 976.721   | 0.623 | 0.214 | 2.910  | 3.6E-03 | 0.01274122 | Homer1    |
| ENSMUSG00000039193 | 1561.209  | 0.623 | 0.127 | 4.906  | 9.3E-07 | 5.8728E-06 | Nlrc4     |
| ENSMUSG00000039703 | 4540.849  | 0.622 | 0.118 | 5.279  | 1.3E-07 | 9.1619E-07 | Nploc4    |
| ENSMUSG00000029708 | 1041.133  | 0.622 | 0.231 | 2.689  | 7.2E-03 | 0.02342015 | Gcc1      |
| ENSMUSG00000022033 | 807.091   | 0.622 | 0.162 | 3.842  | 1.2E-04 | 0.00057184 | Pbk       |
| ENSMUSG00000062169 | 5165.194  | 0.620 | 0.088 | 7.029  | 2.1E-12 | 2.2973E-11 | Cnih4     |
| ENSMUSG00000032231 | 71776.265 | 0.620 | 0.064 | 9.755  | 1.7E-22 | 3.588E-21  | Anxa2     |
| ENSMUSG00000020024 | 1420.337  | 0.620 | 0.158 | 3.924  | 8.7E-05 | 0.00041816 | Cep83     |
| ENSMUSG00000027940 | 24710.473 | 0.619 | 0.072 | 8.659  | 4.8E-18 | 7.7201E-17 | Tpm3      |
| ENSMUSG00000085611 | 284.474   | 0.618 | 0.239 | 2.584  | 9.8E-03 | 0.03063384 | Ap3s1-ps1 |
| ENSMUSG00000046516 | 1063.168  | 0.617 | 0.110 | 5.593  | 2.2E-08 | 1.7161E-07 | Cox17     |
| ENSMUSG00000059669 | 796.572   | 0.617 | 0.175 | 3.517  | 4.4E-04 | 0.00185315 | Taf1b     |
| ENSMUSG00000011958 | 8020.566  | 0.617 | 0.059 | 10.422 | 2.0E-25 | 4.5528E-24 | Bnip2     |
| ENSMUSG00000034792 | 2399.068  | 0.616 | 0.139 | 4.432  | 9.4E-06 | 5.2009E-05 | Gna15     |
| ENSMUSG00000058586 | 172.033   | 0.616 | 0.253 | 2.438  | 1.5E-02 | 0.04409226 | Serhl     |
| ENSMUSG00000029713 | 29985.559 | 0.616 | 0.052 | 11.838 | 2.5E-32 | 7.7069E-31 | Gnb2      |
| ENSMUSG00000035954 | 1192.473  | 0.616 | 0.181 | 3.394  | 6.9E-04 | 0.0028071  | Dock4     |
| ENSMUSG00000001228 | 1387.863  | 0.616 | 0.126 | 4.897  | 9.7E-07 | 6.1446E-06 | Uhrfl     |
| ENSMUSG00000039483 | 2918.381  | 0.616 | 0.085 | 7.259  | 3.9E-13 | 4.5451E-12 | Asb6      |

|                    |           |       |       |        |         |            |               |
|--------------------|-----------|-------|-------|--------|---------|------------|---------------|
| ENSMUSG00000022090 | 1300.389  | 0.616 | 0.148 | 4.153  | 3.3E-05 | 0.00016785 | Pdlim2        |
| ENSMUSG00000029148 | 8026.456  | 0.615 | 0.094 | 6.533  | 6.5E-11 | 6.2907E-10 | Nrbp1         |
| ENSMUSG00000040712 | 3596.437  | 0.615 | 0.127 | 4.848  | 1.2E-06 | 7.7684E-06 | Camta2        |
| ENSMUSG00000021215 | 507.537   | 0.615 | 0.174 | 3.540  | 4.0E-04 | 0.00170979 | Net1          |
| ENSMUSG00000070605 | 150.534   | 0.615 | 0.251 | 2.449  | 1.4E-02 | 0.04287751 | Zfp992        |
| ENSMUSG00000024056 | 514.856   | 0.615 | 0.198 | 3.101  | 1.9E-03 | 0.00722932 | Ndc80         |
| ENSMUSG00000039637 | 5228.327  | 0.615 | 0.120 | 5.118  | 3.1E-07 | 2.0697E-06 | Coro7         |
| ENSMUSG00000024397 | 10329.767 | 0.614 | 0.121 | 5.076  | 3.9E-07 | 2.5521E-06 | Aifl          |
| ENSMUSG00000043131 | 10395.289 | 0.613 | 0.106 | 5.796  | 6.8E-09 | 5.507E-08  | Mob1a         |
| ENSMUSG00000054414 | 4342.992  | 0.613 | 0.090 | 6.786  | 1.2E-11 | 1.1894E-10 | Slc30a7       |
| ENSMUSG00000049686 | 6542.078  | 0.613 | 0.072 | 8.544  | 1.3E-17 | 2.0478E-16 | Orai1         |
| ENSMUSG00000047141 | 774.137   | 0.613 | 0.152 | 4.036  | 5.4E-05 | 0.00027018 | Zfp654        |
| ENSMUSG00000047909 | 1108.207  | 0.612 | 0.162 | 3.771  | 1.6E-04 | 0.00074757 | Ankrd16       |
| ENSMUSG00000035093 | 3670.610  | 0.611 | 0.122 | 4.995  | 5.9E-07 | 3.8089E-06 | Secisbp21     |
| ENSMUSG00000078502 | 173.755   | 0.611 | 0.231 | 2.647  | 8.1E-03 | 0.02607522 | Zfp268        |
| ENSMUSG00000047989 | 1685.422  | 0.611 | 0.137 | 4.472  | 7.8E-06 | 4.3744E-05 | Ino80c        |
| ENSMUSG00000057672 | 3827.339  | 0.610 | 0.101 | 6.026  | 1.7E-09 | 1.4496E-08 | Pkn1          |
| ENSMUSG00000061878 | 1591.564  | 0.610 | 0.156 | 3.911  | 9.2E-05 | 0.00043798 | Sphk1         |
| ENSMUSG00000038034 | 15489.976 | 0.609 | 0.095 | 6.399  | 1.6E-10 | 1.4863E-09 | Igsf8         |
| ENSMUSG00000041035 | 1349.649  | 0.609 | 0.125 | 4.888  | 1.0E-06 | 6.4142E-06 | Gm17018       |
| ENSMUSG00000020849 | 37288.891 | 0.607 | 0.072 | 8.424  | 3.6E-17 | 5.5272E-16 | Ywhae         |
| ENSMUSG00000001403 | 2390.564  | 0.606 | 0.140 | 4.333  | 1.5E-05 | 7.9313E-05 | Ube2c         |
| ENSMUSG00000019907 | 4886.512  | 0.605 | 0.086 | 7.053  | 1.8E-12 | 1.9425E-11 | Ppp1r12a      |
| ENSMUSG00000031781 | 4051.922  | 0.604 | 0.070 | 8.614  | 7.0E-18 | 1.1276E-16 | Ciapi1        |
| ENSMUSG00000008892 | 4566.324  | 0.604 | 0.055 | 11.076 | 1.6E-28 | 4.376E-27  | Vdac3         |
| ENSMUSG00000016495 | 3708.436  | 0.604 | 0.082 | 7.329  | 2.3E-13 | 2.7568E-12 | Plgrkt        |
| ENSMUSG00000021840 | 3653.973  | 0.604 | 0.101 | 5.983  | 2.2E-09 | 1.8721E-08 | Mapk1ip11     |
| ENSMUSG00000026708 | 619.611   | 0.603 | 0.149 | 4.062  | 4.9E-05 | 0.00024331 | Cenpl         |
| ENSMUSG00000042821 | 1190.550  | 0.603 | 0.160 | 3.773  | 1.6E-04 | 0.00074045 | Snai1         |
| ENSMUSG00000021764 | 4007.103  | 0.603 | 0.078 | 7.761  | 8.4E-15 | 1.0971E-13 | Ndufs4        |
| ENSMUSG00000080717 | 592.124   | 0.603 | 0.194 | 3.106  | 1.9E-03 | 0.00713177 | B230307C23Rik |
| ENSMUSG00000030104 | 17700.693 | 0.601 | 0.089 | 6.793  | 1.1E-11 | 1.1317E-10 | Edem1         |
| ENSMUSG00000030659 | 1443.716  | 0.601 | 0.110 | 5.477  | 4.3E-08 | 3.2245E-07 | Nucb2         |
| ENSMUSG00000024590 | 1041.502  | 0.599 | 0.169 | 3.535  | 4.1E-04 | 0.00174045 | Lmnb1         |
| ENSMUSG00000029204 | 2437.788  | 0.598 | 0.175 | 3.411  | 6.5E-04 | 0.00265578 | Rhoh          |
| ENSMUSG00000019998 | 12869.205 | 0.598 | 0.074 | 8.091  | 5.9E-16 | 8.3639E-15 | Stx7          |
| ENSMUSG00000020876 | 1769.051  | 0.598 | 0.148 | 4.038  | 5.4E-05 | 0.00026789 | Snx11         |
| ENSMUSG00000022024 | 3855.635  | 0.598 | 0.112 | 5.353  | 8.7E-08 | 6.2401E-07 | Sugt1         |
| ENSMUSG00000005823 | 8718.795  | 0.598 | 0.094 | 6.349  | 2.2E-10 | 2.0312E-09 | Gpr108        |
| ENSMUSG00000008318 | 1093.306  | 0.597 | 0.157 | 3.805  | 1.4E-04 | 0.00065777 | Relt          |
| ENSMUSG00000018286 | 31163.055 | 0.596 | 0.086 | 6.968  | 3.2E-12 | 3.493E-11  | Psmb6         |
| ENSMUSG00000020717 | 950.718   | 0.596 | 0.188 | 3.164  | 1.6E-03 | 0.00595615 | Pecam1        |
| ENSMUSG00000046711 | 10220.219 | 0.596 | 0.124 | 4.801  | 1.6E-06 | 9.6945E-06 | Hmga1         |
| ENSMUSG00000081888 | 84.532    | 0.594 | 0.246 | 2.417  | 1.6E-02 | 0.04628791 | Spes2-ps      |
| ENSMUSG00000026849 | 5193.792  | 0.594 | 0.080 | 7.440  | 1.0E-13 | 1.2244E-12 | Tor1a         |
| ENSMUSG00000053012 | 4135.143  | 0.594 | 0.109 | 5.455  | 4.9E-08 | 3.6215E-07 | Krcc1         |
| ENSMUSG00000063146 | 361.113   | 0.593 | 0.210 | 2.823  | 4.8E-03 | 0.016338   | Clip2         |
| ENSMUSG00000001588 | 839.257   | 0.593 | 0.216 | 2.746  | 6.0E-03 | 0.02012263 | Acap1         |
| ENSMUSG00000019987 | 9864.654  | 0.591 | 0.228 | 2.590  | 9.6E-03 | 0.03010469 | Arg1          |
| ENSMUSG00000000730 | 588.677   | 0.589 | 0.231 | 2.551  | 1.1E-02 | 0.03328932 | Dnmt31        |
| ENSMUSG00000028191 | 6398.369  | 0.587 | 0.086 | 6.822  | 9.0E-12 | 9.3384E-11 | Bcl10         |
| ENSMUSG00000025235 | 891.737   | 0.587 | 0.170 | 3.458  | 5.4E-04 | 0.00226545 | Bbs4          |

|                    |            |       |       |       |         |            |           |
|--------------------|------------|-------|-------|-------|---------|------------|-----------|
| ENSMUSG00000027878 | 9170.042   | 0.587 | 0.118 | 4.969 | 6.7E-07 | 4.3111E-06 | Notch2    |
| ENSMUSG00000028879 | 6924.497   | 0.586 | 0.090 | 6.482 | 9.1E-11 | 8.7301E-10 | Stx12     |
| ENSMUSG00000015937 | 12793.506  | 0.585 | 0.061 | 9.522 | 1.7E-21 | 3.3347E-20 | Macroh2a1 |
| ENSMUSG00000063406 | 10234.854  | 0.584 | 0.072 | 8.095 | 5.7E-16 | 8.0655E-15 | Tmed5     |
| ENSMUSG00000034269 | 3033.595   | 0.583 | 0.081 | 7.215 | 5.4E-13 | 6.227E-12  | Setd5     |
| ENSMUSG00000028691 | 369673.783 | 0.582 | 0.116 | 5.007 | 5.5E-07 | 3.5785E-06 | Prdx1     |
| ENSMUSG00000022861 | 419.641    | 0.582 | 0.232 | 2.512 | 1.2E-02 | 0.03680632 | Dgkg      |
| ENSMUSG00000083283 | 371.480    | 0.581 | 0.149 | 3.906 | 9.4E-05 | 0.00044739 | Gm15361   |
| ENSMUSG00000020770 | 1156.934   | 0.580 | 0.155 | 3.741 | 1.8E-04 | 0.00083318 | Unk       |
| ENSMUSG00000008475 | 44689.588  | 0.580 | 0.068 | 8.553 | 1.2E-17 | 1.8956E-16 | Arpc5     |
| ENSMUSG00000040659 | 81212.259  | 0.580 | 0.100 | 5.815 | 6.1E-09 | 4.9675E-08 | Efh2      |
| ENSMUSG00000052812 | 1354.084   | 0.579 | 0.169 | 3.424 | 6.2E-04 | 0.00254566 | Atad2b    |
| ENSMUSG00000032525 | 2917.253   | 0.579 | 0.121 | 4.782 | 1.7E-06 | 1.0606E-05 | Nktr      |
| ENSMUSG00000029810 | 16705.795  | 0.579 | 0.145 | 3.988 | 6.7E-05 | 0.00032645 | Tmem176b  |
| ENSMUSG00000015291 | 5511.573   | 0.579 | 0.108 | 5.354 | 8.6E-08 | 6.1892E-07 | Gdi1      |
| ENSMUSG00000059142 | 517.436    | 0.578 | 0.174 | 3.314 | 9.2E-04 | 0.00366647 | Zfp945    |
| ENSMUSG00000029617 | 5730.379   | 0.578 | 0.087 | 6.663 | 2.7E-11 | 2.6869E-10 | Ccz1      |
| ENSMUSG00000041769 | 2375.620   | 0.577 | 0.145 | 3.973 | 7.1E-05 | 0.00034478 | Ppp2r2d   |
| ENSMUSG00000038780 | 1948.265   | 0.577 | 0.160 | 3.609 | 3.1E-04 | 0.00134111 | Smurf1    |
| ENSMUSG00000053038 | 175.618    | 0.576 | 0.229 | 2.510 | 1.2E-02 | 0.03693812 | Gm6180    |
| ENSMUSG00000016257 | 5817.188   | 0.576 | 0.065 | 8.889 | 6.1E-19 | 1.0513E-17 | Preli3b   |
| ENSMUSG00000048076 | 41537.559  | 0.576 | 0.058 | 9.851 | 6.8E-23 | 1.4216E-21 | Arl1      |
| ENSMUSG00000011179 | 4480.388   | 0.576 | 0.190 | 3.023 | 2.5E-03 | 0.00915192 | Odc1      |
| ENSMUSG00000040188 | 11830.257  | 0.576 | 0.110 | 5.249 | 1.5E-07 | 1.0691E-06 | Scamp2    |
| ENSMUSG00000036167 | 3057.999   | 0.576 | 0.106 | 5.445 | 5.2E-08 | 3.8264E-07 | Pphln1    |
| ENSMUSG00000034595 | 13345.271  | 0.576 | 0.080 | 7.222 | 5.1E-13 | 5.9034E-12 | Ppp1r18   |
| ENSMUSG00000006058 | 5575.556   | 0.575 | 0.069 | 8.325 | 8.4E-17 | 1.2593E-15 | Snf8      |
| ENSMUSG00000006362 | 522.938    | 0.575 | 0.187 | 3.068 | 2.2E-03 | 0.00799672 | Cbfa2t3   |
| ENSMUSG00000039048 | 1495.234   | 0.575 | 0.167 | 3.439 | 5.8E-04 | 0.00241967 | Foxred1   |
| ENSMUSG00000022010 | 6085.172   | 0.574 | 0.207 | 2.772 | 5.6E-03 | 0.01874119 | Tsc22d1   |
| ENSMUSG00000026357 | 1826.343   | 0.574 | 0.205 | 2.799 | 5.1E-03 | 0.01745239 | Rgs18     |
| ENSMUSG00000027199 | 3011.448   | 0.573 | 0.240 | 2.389 | 1.7E-02 | 0.04959986 | Gatm      |
| ENSMUSG00000026111 | 4820.335   | 0.572 | 0.087 | 6.563 | 5.3E-11 | 5.1539E-10 | Unc50     |
| ENSMUSG00000025078 | 2010.688   | 0.572 | 0.139 | 4.121 | 3.8E-05 | 0.0001911  | Nhlrc2    |
| ENSMUSG00000005413 | 231317.753 | 0.571 | 0.132 | 4.343 | 1.4E-05 | 7.6119E-05 | Hmxo1     |
| ENSMUSG00000054555 | 360.104    | 0.571 | 0.221 | 2.580 | 9.9E-03 | 0.03092817 | Adam12    |
| ENSMUSG00000005410 | 2245.304   | 0.571 | 0.114 | 5.019 | 5.2E-07 | 3.3863E-06 | Mcm5      |
| ENSMUSG00000029634 | 4210.667   | 0.570 | 0.111 | 5.135 | 2.8E-07 | 1.9034E-06 | Rnf6      |
| ENSMUSG00000015804 | 8716.867   | 0.570 | 0.063 | 9.076 | 1.1E-19 | 1.9907E-18 | Med28     |
| ENSMUSG00000069769 | 454.249    | 0.570 | 0.217 | 2.629 | 8.6E-03 | 0.02735455 | Msi2      |
| ENSMUSG00000031246 | 15800.236  | 0.570 | 0.093 | 6.126 | 9.0E-10 | 7.9558E-09 | Sh3bgrl   |
| ENSMUSG00000002835 | 457.064    | 0.569 | 0.201 | 2.834 | 4.6E-03 | 0.01584541 | Chaf1a    |
| ENSMUSG00000048796 | 812.621    | 0.568 | 0.176 | 3.223 | 1.3E-03 | 0.00493024 | Cyb561d1  |
| ENSMUSG00000026723 | 313.063    | 0.568 | 0.182 | 3.117 | 1.8E-03 | 0.00687655 | Trdmt1    |
| ENSMUSG00000042404 | 2531.144   | 0.568 | 0.169 | 3.365 | 7.6E-04 | 0.0030982  | Dennd4b   |
| ENSMUSG00000039164 | 814.837    | 0.568 | 0.191 | 2.967 | 3.0E-03 | 0.01082635 | Naif1     |
| ENSMUSG00000028958 | 1240.625   | 0.568 | 0.153 | 3.722 | 2.0E-04 | 0.00089506 | Tmub1     |
| ENSMUSG00000020027 | 1107.552   | 0.568 | 0.150 | 3.793 | 1.5E-04 | 0.00068974 | Socs2     |
| ENSMUSG00000060090 | 2882.739   | 0.567 | 0.090 | 6.291 | 3.2E-10 | 2.9149E-09 | Rp2       |
| ENSMUSG00000031540 | 730.107    | 0.567 | 0.163 | 3.479 | 5.0E-04 | 0.00210499 | Kat6a     |
| ENSMUSG00000036931 | 2214.290   | 0.567 | 0.135 | 4.204 | 2.6E-05 | 0.00013588 | Nfkbid    |
| ENSMUSG00000024561 | 2646.168   | 0.566 | 0.109 | 5.188 | 2.1E-07 | 1.4555E-06 | Mbd1      |



|                    |           |       |       |        |         |            |          |
|--------------------|-----------|-------|-------|--------|---------|------------|----------|
| ENSMUSG00000018171 | 22384.629 | 0.566 | 0.075 | 7.574  | 3.6E-14 | 4.5184E-13 | Vmp1     |
| ENSMUSG00000063229 | 98468.592 | 0.566 | 0.068 | 8.313  | 9.3E-17 | 1.3901E-15 | Ldha     |
| ENSMUSG00000026180 | 571.742   | 0.566 | 0.198 | 2.852  | 4.3E-03 | 0.0150389  | Cxcr2    |
| ENSMUSG00000022844 | 858.589   | 0.565 | 0.214 | 2.635  | 8.4E-03 | 0.02693739 | Pdia5    |
| ENSMUSG00000028059 | 8261.786  | 0.565 | 0.096 | 5.915  | 3.3E-09 | 2.7754E-08 | Arhgef2  |
| ENSMUSG00000030816 | 3179.530  | 0.565 | 0.120 | 4.723  | 2.3E-06 | 1.4037E-05 | Rnf40    |
| ENSMUSG00000073421 | 22895.443 | 0.565 | 0.142 | 3.979  | 6.9E-05 | 0.00033774 | H2-Ab1   |
| ENSMUSG00000047248 | 726.647   | 0.564 | 0.173 | 3.268  | 1.1E-03 | 0.00427385 | C2cd3    |
| ENSMUSG00000031266 | 9479.141  | 0.564 | 0.140 | 4.020  | 5.8E-05 | 0.00028719 | Gla      |
| ENSMUSG00000074797 | 1574.377  | 0.564 | 0.109 | 5.157  | 2.5E-07 | 1.7029E-06 | Itpa     |
| ENSMUSG00000023330 | 1003.217  | 0.564 | 0.142 | 3.975  | 7.0E-05 | 0.00034242 | Dtwd1    |
| ENSMUSG00000021772 | 474.998   | 0.563 | 0.196 | 2.879  | 4.0E-03 | 0.0139155  | Nkiras1  |
| ENSMUSG00000020484 | 21076.025 | 0.563 | 0.050 | 11.227 | 3.0E-29 | 8.1858E-28 | Xbp1     |
| ENSMUSG00000003131 | 7111.822  | 0.563 | 0.090 | 6.231  | 4.6E-10 | 4.2068E-09 | Pafah1b2 |
| ENSMUSG00000024668 | 3064.643  | 0.563 | 0.110 | 5.122  | 3.0E-07 | 2.0282E-06 | Sdhaf2   |
| ENSMUSG00000024260 | 1337.911  | 0.561 | 0.136 | 4.137  | 3.5E-05 | 0.00017884 | Sap130   |
| ENSMUSG00000022221 | 2540.615  | 0.561 | 0.135 | 4.172  | 3.0E-05 | 0.00015484 | Ripk3    |
| ENSMUSG00000073910 | 905.302   | 0.561 | 0.172 | 3.263  | 1.1E-03 | 0.00434003 | Mob3b    |
| ENSMUSG00000074476 | 1025.955  | 0.560 | 0.147 | 3.803  | 1.4E-04 | 0.0006634  | Spc24    |
| ENSMUSG00000054302 | 2850.089  | 0.560 | 0.111 | 5.060  | 4.2E-07 | 2.7569E-06 | Eapp     |
| ENSMUSG00000022639 | 1521.031  | 0.560 | 0.134 | 4.188  | 2.8E-05 | 0.00014544 | Dubr     |
| ENSMUSG00000004460 | 9865.741  | 0.559 | 0.057 | 9.790  | 1.2E-22 | 2.5764E-21 | Dnajb11  |
| ENSMUSG00000046909 | 617.150   | 0.559 | 0.167 | 3.355  | 7.9E-04 | 0.00320366 | Tefm     |
| ENSMUSG00000026470 | 5642.452  | 0.559 | 0.075 | 7.441  | 1.0E-13 | 1.2162E-12 | Stx6     |
| ENSMUSG00000026775 | 6156.161  | 0.559 | 0.063 | 8.919  | 4.7E-19 | 8.0636E-18 | Yme111   |
| ENSMUSG00000028419 | 7587.579  | 0.558 | 0.084 | 6.679  | 2.4E-11 | 2.429E-10  | Chmp5    |
| ENSMUSG00000027566 | 41936.424 | 0.557 | 0.090 | 6.212  | 5.2E-10 | 4.716E-09  | Psma7    |
| ENSMUSG00000063019 | 3373.569  | 0.557 | 0.113 | 4.929  | 8.2E-07 | 5.2377E-06 | Manbal   |
| ENSMUSG00000047694 | 2396.758  | 0.557 | 0.115 | 4.845  | 1.3E-06 | 7.8695E-06 | Yipf6    |
| ENSMUSG00000022329 | 1423.735  | 0.556 | 0.162 | 3.432  | 6.0E-04 | 0.00247404 | Stk3     |
| ENSMUSG00000040663 | 1393.071  | 0.556 | 0.150 | 3.700  | 2.2E-04 | 0.00096781 | Clefl    |
| ENSMUSG00000029782 | 1886.828  | 0.556 | 0.114 | 4.863  | 1.2E-06 | 7.2212E-06 | Tmem209  |
| ENSMUSG00000058317 | 441.310   | 0.556 | 0.176 | 3.165  | 1.6E-03 | 0.00594176 | Ube2e2   |
| ENSMUSG00000030346 | 375.337   | 0.556 | 0.211 | 2.628  | 8.6E-03 | 0.02743169 | Rad51ap1 |
| ENSMUSG00000003458 | 10926.880 | 0.555 | 0.081 | 6.854  | 7.2E-12 | 7.5584E-11 | Ncstn    |
| ENSMUSG00000024163 | 1148.616  | 0.555 | 0.165 | 3.358  | 7.8E-04 | 0.00317101 | Mapk8ip3 |
| ENSMUSG00000028837 | 17462.862 | 0.555 | 0.053 | 10.408 | 2.3E-25 | 5.2554E-24 | Psmb2    |
| ENSMUSG00000028668 | 5680.636  | 0.555 | 0.100 | 5.554  | 2.8E-08 | 2.1279E-07 | Eloa     |
| ENSMUSG00000038212 | 7213.411  | 0.555 | 0.091 | 6.064  | 1.3E-09 | 1.1528E-08 | Mfsd14b  |
| ENSMUSG00000037966 | 63935.018 | 0.554 | 0.088 | 6.302  | 2.9E-10 | 2.7243E-09 | Ninj1    |
| ENSMUSG00000049878 | 1237.553  | 0.554 | 0.143 | 3.878  | 1.1E-04 | 0.00049779 | Rlf      |
| ENSMUSG00000046722 | 13800.931 | 0.554 | 0.084 | 6.588  | 4.5E-11 | 4.3965E-10 | Cdc42se1 |
| ENSMUSG00000020108 | 813.710   | 0.553 | 0.200 | 2.765  | 5.7E-03 | 0.0191221  | Ddit4    |
| ENSMUSG00000050188 | 1707.000  | 0.553 | 0.125 | 4.418  | 9.9E-06 | 5.5063E-05 | Lsm10    |
| ENSMUSG00000069237 | 755.758   | 0.553 | 0.170 | 3.253  | 1.1E-03 | 0.00449557 | Fam8a1   |
| ENSMUSG00000046519 | 1412.125  | 0.552 | 0.165 | 3.349  | 8.1E-04 | 0.00327078 | Golph31  |
| ENSMUSG00000037552 | 1415.139  | 0.552 | 0.165 | 3.334  | 8.5E-04 | 0.00343055 | Plekhg2  |
| ENSMUSG00000029017 | 2809.056  | 0.551 | 0.098 | 5.636  | 1.7E-08 | 1.3555E-07 | Pmpcb    |
| ENSMUSG00000052435 | 2848.018  | 0.551 | 0.191 | 2.880  | 4.0E-03 | 0.01386386 | Cebpe    |
| ENSMUSG00000027593 | 1355.030  | 0.551 | 0.149 | 3.700  | 2.2E-04 | 0.00096781 | Raly     |
| ENSMUSG00000028923 | 14411.504 | 0.551 | 0.098 | 5.633  | 1.8E-08 | 1.3795E-07 | Necap2   |
| ENSMUSG00000006736 | 4668.679  | 0.551 | 0.079 | 6.965  | 3.3E-12 | 3.5598E-11 | Tspan31  |

|                    |           |       |       |       |         |            |          |
|--------------------|-----------|-------|-------|-------|---------|------------|----------|
| ENSMUSG00000022849 | 644.596   | 0.551 | 0.146 | 3.767 | 1.7E-04 | 0.0007585  | Hspbp1   |
| ENSMUSG00000017679 | 1367.295  | 0.550 | 0.136 | 4.036 | 5.4E-05 | 0.00026928 | Ttpal    |
| ENSMUSG00000032561 | 1273.154  | 0.550 | 0.212 | 2.596 | 9.4E-03 | 0.02966115 | Acpp     |
| ENSMUSG00000029068 | 7543.447  | 0.550 | 0.090 | 6.125 | 9.0E-10 | 7.9983E-09 | Ccn12    |
| ENSMUSG00000028032 | 1983.199  | 0.550 | 0.104 | 5.291 | 1.2E-07 | 8.6077E-07 | Papss1   |
| ENSMUSG00000027552 | 1180.116  | 0.549 | 0.157 | 3.498 | 4.7E-04 | 0.00197481 | E2f5     |
| ENSMUSG00000023277 | 7328.716  | 0.549 | 0.057 | 9.591 | 8.7E-22 | 1.7295E-20 | Twf2     |
| ENSMUSG00000041187 | 1084.615  | 0.549 | 0.157 | 3.491 | 4.8E-04 | 0.00202375 | Prkd2    |
| ENSMUSG00000020069 | 847.005   | 0.549 | 0.138 | 3.978 | 7.0E-05 | 0.00033873 | Hnrnp3   |
| ENSMUSG00000028228 | 6682.158  | 0.547 | 0.109 | 5.018 | 5.2E-07 | 3.39E-06   | Cpne3    |
| ENSMUSG00000111361 | 200.970   | 0.547 | 0.181 | 3.022 | 2.5E-03 | 0.00919964 | Gm47445  |
| ENSMUSG00000020495 | 3588.299  | 0.547 | 0.105 | 5.213 | 1.9E-07 | 1.2833E-06 | Smg8     |
| ENSMUSG00000025162 | 9117.560  | 0.547 | 0.105 | 5.203 | 2.0E-07 | 1.3465E-06 | Csnk1d   |
| ENSMUSG00000024845 | 5193.010  | 0.547 | 0.092 | 5.945 | 2.8E-09 | 2.3321E-08 | Tmem134  |
| ENSMUSG00000011256 | 424.504   | 0.546 | 0.207 | 2.638 | 8.3E-03 | 0.02668431 | Adam19   |
| ENSMUSG00000056515 | 16402.080 | 0.546 | 0.126 | 4.342 | 1.4E-05 | 7.6536E-05 | Rab31    |
| ENSMUSG00000117145 | 138.956   | 0.546 | 0.202 | 2.699 | 6.9E-03 | 0.02278612 | Gm4356   |
| ENSMUSG00000066800 | 2459.444  | 0.545 | 0.205 | 2.663 | 7.8E-03 | 0.02502943 | Rnasel   |
| ENSMUSG00000084288 | 180.089   | 0.545 | 0.183 | 2.985 | 2.8E-03 | 0.0102727  | Mif-ps8  |
| ENSMUSG00000032328 | 13799.834 | 0.545 | 0.110 | 4.960 | 7.1E-07 | 4.5175E-06 | Tmem30a  |
| ENSMUSG00000031585 | 2622.468  | 0.545 | 0.117 | 4.641 | 3.5E-06 | 2.0459E-05 | Gtf2e2   |
| ENSMUSG00000053819 | 8469.023  | 0.545 | 0.087 | 6.289 | 3.2E-10 | 2.9466E-09 | Camk2d   |
| ENSMUSG00000037197 | 5518.773  | 0.544 | 0.078 | 6.929 | 4.3E-12 | 4.5727E-11 | Rbm17    |
| ENSMUSG00000028381 | 2911.173  | 0.543 | 0.137 | 3.972 | 7.1E-05 | 0.00034719 | Ugcg     |
| ENSMUSG00000029513 | 3122.213  | 0.543 | 0.110 | 4.956 | 7.2E-07 | 4.5981E-06 | Prkab1   |
| ENSMUSG00000026248 | 1953.197  | 0.543 | 0.082 | 6.653 | 2.9E-11 | 2.8806E-10 | Mrpl44   |
| ENSMUSG00000078908 | 1182.630  | 0.543 | 0.165 | 3.290 | 1.0E-03 | 0.00396867 | Mon1b    |
| ENSMUSG00000000157 | 2103.447  | 0.542 | 0.221 | 2.458 | 1.4E-02 | 0.04199796 | Itgb21   |
| ENSMUSG00000062526 | 1159.086  | 0.542 | 0.136 | 3.984 | 6.8E-05 | 0.00033064 | Mppel    |
| ENSMUSG00000054717 | 2847.179  | 0.542 | 0.144 | 3.759 | 1.7E-04 | 0.00078049 | Hmgb2    |
| ENSMUSG00000000600 | 3088.356  | 0.541 | 0.095 | 5.676 | 1.4E-08 | 1.0808E-07 | Krit1    |
| ENSMUSG00000036810 | 1780.066  | 0.541 | 0.129 | 4.181 | 2.9E-05 | 0.00014962 | Cnep1r1  |
| ENSMUSG00000019820 | 1841.412  | 0.541 | 0.149 | 3.625 | 2.9E-04 | 0.00127229 | Utrn     |
| ENSMUSG00000041025 | 607.387   | 0.540 | 0.135 | 3.998 | 6.4E-05 | 0.00031365 | Iffo2    |
| ENSMUSG00000054792 | 945.898   | 0.540 | 0.214 | 2.527 | 1.1E-02 | 0.03539172 | Klh118   |
| ENSMUSG00000041203 | 4666.367  | 0.540 | 0.074 | 7.294 | 3.0E-13 | 3.5455E-12 | Trir     |
| ENSMUSG00000039166 | 391.864   | 0.539 | 0.201 | 2.682 | 7.3E-03 | 0.02385036 | Akap7    |
| ENSMUSG00000024826 | 5459.588  | 0.539 | 0.081 | 6.678 | 2.4E-11 | 2.4432E-10 | Dpf2     |
| ENSMUSG00000024856 | 4645.513  | 0.539 | 0.105 | 5.110 | 3.2E-07 | 2.149E-06  | Cdk2ap2  |
| ENSMUSG00000018381 | 653.511   | 0.538 | 0.163 | 3.295 | 9.8E-04 | 0.00391087 | Abi3     |
| ENSMUSG00000050628 | 1614.725  | 0.538 | 0.097 | 5.539 | 3.0E-08 | 2.3035E-07 | Ubal2    |
| ENSMUSG00000056394 | 1206.138  | 0.538 | 0.162 | 3.330 | 8.7E-04 | 0.00348324 | Lig1     |
| ENSMUSG00000025981 | 1531.352  | 0.538 | 0.138 | 3.899 | 9.7E-05 | 0.00045947 | Coq10b   |
| ENSMUSG00000055371 | 4174.108  | 0.538 | 0.084 | 6.376 | 1.8E-10 | 1.7116E-09 | Stam2    |
| ENSMUSG00000000131 | 4359.939  | 0.538 | 0.117 | 4.607 | 4.1E-06 | 2.3934E-05 | Xpo6     |
| ENSMUSG00000032519 | 781.554   | 0.537 | 0.209 | 2.573 | 1.0E-02 | 0.03147512 | Slc25a38 |
| ENSMUSG00000020196 | 3279.705  | 0.537 | 0.123 | 4.353 | 1.3E-05 | 7.3139E-05 | Cabin1   |
| ENSMUSG00000040990 | 8087.542  | 0.536 | 0.090 | 5.974 | 2.3E-09 | 1.9664E-08 | Sh3kbp1  |
| ENSMUSG00000033352 | 6451.927  | 0.536 | 0.130 | 4.116 | 3.9E-05 | 0.00019523 | Map2k4   |
| ENSMUSG00000031681 | 1379.405  | 0.536 | 0.144 | 3.721 | 2.0E-04 | 0.0008958  | Smad1    |
| ENSMUSG00000001098 | 3156.662  | 0.536 | 0.095 | 5.636 | 1.7E-08 | 1.3557E-07 | Kctd10   |
| ENSMUSG00000027349 | 540.938   | 0.536 | 0.218 | 2.455 | 1.4E-02 | 0.04235143 | Fam98b   |

|                    |            |       |       |        |         |            |         |
|--------------------|------------|-------|-------|--------|---------|------------|---------|
| ENSMUSG00000027712 | 68510.764  | 0.536 | 0.059 | 9.078  | 1.1E-19 | 1.9546E-18 | Anxa5   |
| ENSMUSG00000021891 | 2196.408   | 0.535 | 0.069 | 7.724  | 1.1E-14 | 1.4492E-13 | Mettl6  |
| ENSMUSG00000040225 | 5757.798   | 0.534 | 0.096 | 5.550  | 2.9E-08 | 2.1674E-07 | Prrc2c  |
| ENSMUSG00000028854 | 1059.161   | 0.534 | 0.149 | 3.586  | 3.4E-04 | 0.00145874 | Slc9a1  |
| ENSMUSG00000060992 | 10674.472  | 0.533 | 0.077 | 6.890  | 5.6E-12 | 5.9208E-11 | Copz1   |
| ENSMUSG00000027007 | 3455.978   | 0.532 | 0.122 | 4.345  | 1.4E-05 | 7.5504E-05 | Itprid2 |
| ENSMUSG00000058835 | 7416.366   | 0.531 | 0.080 | 6.676  | 2.5E-11 | 2.4736E-10 | Abi1    |
| ENSMUSG00000028779 | 3569.362   | 0.531 | 0.102 | 5.192  | 2.1E-07 | 1.4254E-06 | Pefl    |
| ENSMUSG00000026766 | 4295.111   | 0.531 | 0.080 | 6.638  | 3.2E-11 | 3.1668E-10 | Mmadhc  |
| ENSMUSG00000024414 | 1853.363   | 0.530 | 0.132 | 4.018  | 5.9E-05 | 0.00028992 | Mrpl27  |
| ENSMUSG00000024965 | 46112.890  | 0.530 | 0.076 | 6.991  | 2.7E-12 | 2.9834E-11 | Fermt3  |
| ENSMUSG00000030058 | 4965.690   | 0.530 | 0.107 | 4.936  | 8.0E-07 | 5.0683E-06 | Copg1   |
| ENSMUSG00000024387 | 8086.177   | 0.530 | 0.072 | 7.407  | 1.3E-13 | 1.5623E-12 | Csnk2b  |
| ENSMUSG00000036908 | 55686.526  | 0.529 | 0.091 | 5.836  | 5.3E-09 | 4.3816E-08 | Unc93b1 |
| ENSMUSG00000031770 | 4178.262   | 0.529 | 0.122 | 4.325  | 1.5E-05 | 8.2165E-05 | Herpud1 |
| ENSMUSG00000028411 | 1586.444   | 0.528 | 0.161 | 3.288  | 1.0E-03 | 0.003999   | Aptx    |
| ENSMUSG00000026254 | 7251.478   | 0.528 | 0.065 | 8.083  | 6.3E-16 | 8.885E-15  | Eif4e2  |
| ENSMUSG00000031078 | 5217.852   | 0.527 | 0.096 | 5.507  | 3.7E-08 | 2.7468E-07 | Cttt    |
| ENSMUSG00000041959 | 8763.783   | 0.527 | 0.112 | 4.704  | 2.6E-06 | 1.5317E-05 | S100a10 |
| ENSMUSG00000022139 | 11862.582  | 0.527 | 0.079 | 6.638  | 3.2E-11 | 3.1746E-10 | Mbnl2   |
| ENSMUSG00000055670 | 1008.045   | 0.527 | 0.142 | 3.719  | 2.0E-04 | 0.00090458 | Zzef1   |
| ENSMUSG00000026270 | 722.146    | 0.527 | 0.215 | 2.452  | 1.4E-02 | 0.04262844 | Capn10  |
| ENSMUSG00000031072 | 1840.959   | 0.527 | 0.119 | 4.424  | 9.7E-06 | 5.3845E-05 | LTO1    |
| ENSMUSG00000032316 | 3339.661   | 0.527 | 0.091 | 5.802  | 6.6E-09 | 5.3262E-08 | Clk3    |
| ENSMUSG00000024970 | 755.617    | 0.526 | 0.151 | 3.474  | 5.1E-04 | 0.00214189 | Spindoc |
| ENSMUSG00000039067 | 11193.352  | 0.525 | 0.060 | 8.785  | 1.6E-18 | 2.6205E-17 | Psmc7   |
| ENSMUSG00000040928 | 395.975    | 0.525 | 0.167 | 3.136  | 1.7E-03 | 0.00648534 | S100pbp |
| ENSMUSG00000019826 | 962.755    | 0.525 | 0.143 | 3.662  | 2.5E-04 | 0.0011114  | Zbtb24  |
| ENSMUSG00000028932 | 7701.047   | 0.525 | 0.072 | 7.257  | 4.0E-13 | 4.6247E-12 | Psmc2   |
| ENSMUSG00000031916 | 3717.747   | 0.525 | 0.103 | 5.103  | 3.3E-07 | 2.2332E-06 | Cog8    |
| ENSMUSG00000031422 | 8842.346   | 0.524 | 0.071 | 7.338  | 2.2E-13 | 2.5992E-12 | Morf4l2 |
| ENSMUSG00000059336 | 811.253    | 0.524 | 0.183 | 2.861  | 4.2E-03 | 0.01465791 | Slc14a1 |
| ENSMUSG00000020573 | 3301.259   | 0.524 | 0.180 | 2.912  | 3.6E-03 | 0.01267233 | Pik3cg  |
| ENSMUSG00000031948 | 9560.786   | 0.524 | 0.087 | 6.007  | 1.9E-09 | 1.6271E-08 | Kars    |
| ENSMUSG00000028343 | 5693.806   | 0.522 | 0.069 | 7.593  | 3.1E-14 | 3.9272E-13 | Erp44   |
| ENSMUSG00000029471 | 4278.989   | 0.522 | 0.110 | 4.757  | 2.0E-06 | 1.1942E-05 | Camkk2  |
| ENSMUSG00000040263 | 1677.417   | 0.522 | 0.127 | 4.098  | 4.2E-05 | 0.00021037 | Klhdc4  |
| ENSMUSG00000022425 | 388.326    | 0.522 | 0.208 | 2.506  | 1.2E-02 | 0.03732234 | Enpp2   |
| ENSMUSG00000001175 | 100197.180 | 0.522 | 0.045 | 11.642 | 2.5E-31 | 7.4777E-30 | Calm1   |
| ENSMUSG00000022614 | 4641.578   | 0.522 | 0.117 | 4.472  | 7.7E-06 | 4.3632E-05 | Lmf2    |
| ENSMUSG00000029345 | 1713.191   | 0.521 | 0.147 | 3.545  | 3.9E-04 | 0.00167912 | Tfip11  |
| ENSMUSG00000059273 | 893.143    | 0.521 | 0.132 | 3.938  | 8.2E-05 | 0.00039549 | Zc3h4   |
| ENSMUSG00000020422 | 4571.593   | 0.519 | 0.108 | 4.791  | 1.7E-06 | 1.0197E-05 | Tns3    |
| ENSMUSG00000019986 | 407.163    | 0.518 | 0.211 | 2.459  | 1.4E-02 | 0.04183565 | Ahi1    |
| ENSMUSG00000020653 | 581.072    | 0.517 | 0.181 | 2.856  | 4.3E-03 | 0.01489584 | Klf11   |
| ENSMUSG00000025860 | 3118.134   | 0.517 | 0.123 | 4.189  | 2.8E-05 | 0.00014466 | Xiap    |
| ENSMUSG00000026923 | 4312.536   | 0.517 | 0.144 | 3.585  | 3.4E-04 | 0.00146058 | Notch1  |
| ENSMUSG00000030281 | 510.648    | 0.516 | 0.215 | 2.402  | 1.6E-02 | 0.04803896 | Il17rc  |
| ENSMUSG00000058298 | 688.563    | 0.516 | 0.209 | 2.476  | 1.3E-02 | 0.04022522 | Mcm9    |
| ENSMUSG00000081485 | 648.117    | 0.516 | 0.197 | 2.621  | 8.8E-03 | 0.02788893 | Gm12338 |
| ENSMUSG00000027079 | 1555.959   | 0.516 | 0.127 | 4.052  | 5.1E-05 | 0.00025397 | Clp1    |
| ENSMUSG00000005103 | 47106.944  | 0.516 | 0.048 | 10.834 | 2.4E-27 | 6.0021E-26 | Wdr1    |

|                      |           |       |       |       |         |            |               |
|----------------------|-----------|-------|-------|-------|---------|------------|---------------|
| ENSMUSG00000068566   | 8817.249  | 0.515 | 0.104 | 4.927 | 8.3E-07 | 5.2925E-06 | Myadm         |
| ENSMUSG00000025971   | 480.120   | 0.515 | 0.197 | 2.617 | 8.9E-03 | 0.02821352 | Maip1         |
| ENSMUSG000000041781  | 2752.777  | 0.514 | 0.149 | 3.452 | 5.6E-04 | 0.002311   | Cpsf2         |
| ENSMUSG000000042508  | 1727.344  | 0.514 | 0.117 | 4.376 | 1.2E-05 | 6.6062E-05 | Dmtf1         |
| ENSMUSG000000023367  | 13375.562 | 0.514 | 0.133 | 3.855 | 1.2E-04 | 0.00054379 | Tmem176a      |
| ENSMUSG000000024487  | 4272.416  | 0.513 | 0.072 | 7.077 | 1.5E-12 | 1.643E-11  | Yipf5         |
| ENSMUSG000000038151  | 1459.396  | 0.512 | 0.183 | 2.794 | 5.2E-03 | 0.01771835 | Prdm1         |
| ENSMUSG000000016833  | 814.905   | 0.512 | 0.174 | 2.942 | 3.3E-03 | 0.0116365  | Mrps18c       |
| ENSMUSG000000022313  | 708.724   | 0.512 | 0.115 | 4.437 | 9.1E-06 | 5.0819E-05 | Utp23         |
| ENSMUSG000000033434  | 745.524   | 0.511 | 0.133 | 3.845 | 1.2E-04 | 0.00056378 | Gtpbp6        |
| ENSMUSG000000041515  | 31201.782 | 0.510 | 0.143 | 3.564 | 3.7E-04 | 0.00157332 | Irf8          |
| ENSMUSG000000028364  | 6966.502  | 0.509 | 0.168 | 3.036 | 2.4E-03 | 0.00881259 | Tnc           |
| ENSMUSG000000039377  | 7613.676  | 0.509 | 0.092 | 5.521 | 3.4E-08 | 2.5398E-07 | Hlx           |
| ENSMUSG000000039910  | 14951.483 | 0.509 | 0.110 | 4.624 | 3.8E-06 | 2.2179E-05 | Cited2        |
| ENSMUSG000000029344  | 13311.391 | 0.509 | 0.083 | 6.123 | 9.2E-10 | 8.0974E-09 | Tpst2         |
| ENSMUSG000000039844  | 1849.842  | 0.509 | 0.134 | 3.792 | 1.5E-04 | 0.00068987 | Rapgef1       |
| ENSMUSG000000026767  | 2001.838  | 0.509 | 0.117 | 4.349 | 1.4E-05 | 7.4107E-05 | Mindy3        |
| ENSMUSG000000015880  | 575.254   | 0.508 | 0.208 | 2.440 | 1.5E-02 | 0.04388257 | Ncapg         |
| ENSMUSG000000060601  | 9795.905  | 0.508 | 0.093 | 5.492 | 4.0E-08 | 2.9726E-07 | Nr1h2         |
| ENSMUSG000000063354  | 1291.298  | 0.508 | 0.177 | 2.878 | 4.0E-03 | 0.01394013 | Slc39a4       |
| ENSMUSG000000040054  | 1685.295  | 0.508 | 0.142 | 3.572 | 3.5E-04 | 0.00153173 | Baz2a         |
| ENSMUSG000000038615  | 4030.280  | 0.508 | 0.100 | 5.083 | 3.7E-07 | 2.4716E-06 | Nfe211        |
| ENSMUSG000000047123  | 1658.286  | 0.507 | 0.154 | 3.291 | 1.0E-03 | 0.00396049 | Ticam1        |
| ENSMUSG000000036275  | 12279.771 | 0.507 | 0.094 | 5.411 | 6.3E-08 | 4.5844E-07 | 9530068E07Rik |
| ENSMUSG000000027080  | 1456.933  | 0.507 | 0.140 | 3.622 | 2.9E-04 | 0.00128276 | Med19         |
| ENSMUSG000000037636  | 707.513   | 0.507 | 0.175 | 2.890 | 3.8E-03 | 0.01347541 | Slc25a43      |
| ENSMUSG000000019338  | 1507.662  | 0.507 | 0.145 | 3.495 | 4.7E-04 | 0.0019958  | Zfp687        |
| ENSMUSG000000054611  | 2974.949  | 0.506 | 0.093 | 5.473 | 4.4E-08 | 3.3E-07    | Kdm2a         |
| ENSMUSG000000028420  | 2473.631  | 0.506 | 0.099 | 5.140 | 2.7E-07 | 1.8564E-06 | Tmem38b       |
| ENSMUSG000000047866  | 3547.443  | 0.505 | 0.117 | 4.309 | 1.6E-05 | 8.8031E-05 | Lonp2         |
| ENSMUSG000000015335  | 2428.120  | 0.505 | 0.106 | 4.750 | 2.0E-06 | 1.2328E-05 | Zdhhc12       |
| ENSMUSG000000002679  | 1220.722  | 0.504 | 0.096 | 5.276 | 1.3E-07 | 9.2889E-07 | Med6          |
| ENSMUSG000000028789  | 520.137   | 0.504 | 0.166 | 3.039 | 2.4E-03 | 0.00873492 | Azin2         |
| ENSMUSG000000028771  | 1810.739  | 0.504 | 0.128 | 3.941 | 8.1E-05 | 0.00039145 | Ptpn12        |
| ENSMUSG0000000112926 | 329.169   | 0.504 | 0.187 | 2.696 | 7.0E-03 | 0.02297177 | Gm7172        |
| ENSMUSG000000084368  | 133.046   | 0.504 | 0.211 | 2.388 | 1.7E-02 | 0.04967524 | Gm11572       |
| ENSMUSG000000026662  | 2302.836  | 0.504 | 0.096 | 5.241 | 1.6E-07 | 1.1155E-06 | Sephs1        |
| ENSMUSG000000024360  | 6414.112  | 0.503 | 0.074 | 6.775 | 1.2E-11 | 1.2832E-10 | Etf1          |
| ENSMUSG000000022663  | 7369.772  | 0.503 | 0.077 | 6.538 | 6.2E-11 | 6.0897E-10 | Atg3          |
| ENSMUSG000000040268  | 2842.074  | 0.503 | 0.091 | 5.520 | 3.4E-08 | 2.5561E-07 | Plekha1       |
| ENSMUSG000000028619  | 1346.388  | 0.503 | 0.165 | 3.049 | 2.3E-03 | 0.00848066 | Tceanc2       |
| ENSMUSG000000043067  | 895.437   | 0.501 | 0.165 | 3.036 | 2.4E-03 | 0.00880015 | Dpy1911       |
| ENSMUSG000000084957  | 2502.300  | 0.501 | 0.078 | 6.409 | 1.5E-10 | 1.3889E-09 | Bbip1         |
| ENSMUSG000000013584  | 1504.039  | 0.501 | 0.150 | 3.338 | 8.4E-04 | 0.00339294 | Aldh1a2       |
| ENSMUSG000000056579  | 5676.033  | 0.501 | 0.107 | 4.699 | 2.6E-06 | 1.5647E-05 | Tug1          |
| ENSMUSG000000001424  | 6490.239  | 0.501 | 0.088 | 5.663 | 1.5E-08 | 1.1646E-07 | Snd1          |
| ENSMUSG000000031093  | 1420.798  | 0.500 | 0.150 | 3.341 | 8.4E-04 | 0.00336557 | Dock11        |
| ENSMUSG000000054263  | 831.362   | 0.500 | 0.200 | 2.499 | 1.2E-02 | 0.03794965 | Lifr          |
| ENSMUSG000000097352  | 774.431   | 0.499 | 0.182 | 2.742 | 6.1E-03 | 0.02034991 | C920009B18Rik |
| ENSMUSG000000037958  | 1897.604  | 0.499 | 0.117 | 4.261 | 2.0E-05 | 0.00010748 | Nsrp1         |
| ENSMUSG000000020346  | 8379.117  | 0.499 | 0.107 | 4.683 | 2.8E-06 | 1.6894E-05 | Mgat1         |
| ENSMUSG000000024830  | 1241.106  | 0.499 | 0.119 | 4.188 | 2.8E-05 | 0.00014543 | Rps6kb2       |

|                    |           |       |       |       |         |            |               |
|--------------------|-----------|-------|-------|-------|---------|------------|---------------|
| ENSMUSG00000026158 | 3922.104  | 0.499 | 0.173 | 2.885 | 3.9E-03 | 0.013682   | Ogfr1l        |
| ENSMUSG00000002668 | 3868.060  | 0.499 | 0.105 | 4.741 | 2.1E-06 | 1.287E-05  | Dennd1c       |
| ENSMUSG00000044783 | 2010.453  | 0.499 | 0.109 | 4.576 | 4.7E-06 | 2.7456E-05 | Hjurp         |
| ENSMUSG00000109812 | 1627.178  | 0.498 | 0.133 | 3.738 | 1.9E-04 | 0.00084329 | Gm45640       |
| ENSMUSG00000017677 | 9539.122  | 0.498 | 0.070 | 7.067 | 1.6E-12 | 1.7587E-11 | Wsb1          |
| ENSMUSG00000020530 | 5713.363  | 0.496 | 0.086 | 5.754 | 8.7E-09 | 6.9823E-08 | Ggnbp2        |
| ENSMUSG00000026970 | 24991.388 | 0.495 | 0.095 | 5.183 | 2.2E-07 | 1.4894E-06 | Rbms1         |
| ENSMUSG00000003032 | 571.095   | 0.494 | 0.207 | 2.389 | 1.7E-02 | 0.04961409 | Klf4          |
| ENSMUSG00000001158 | 3837.833  | 0.494 | 0.093 | 5.335 | 9.6E-08 | 6.8402E-07 | Snrnp27       |
| ENSMUSG00000038957 | 2050.105  | 0.494 | 0.093 | 5.327 | 1.0E-07 | 7.1211E-07 | Edc3          |
| ENSMUSG00000027573 | 2253.862  | 0.492 | 0.107 | 4.599 | 4.3E-06 | 2.4824E-05 | Gid8          |
| ENSMUSG00000053286 | 2710.712  | 0.492 | 0.126 | 3.892 | 9.9E-05 | 0.00047049 | Trmt1l        |
| ENSMUSG00000049516 | 1966.935  | 0.491 | 0.120 | 4.106 | 4.0E-05 | 0.00020332 | Spty2d1       |
| ENSMUSG00000020288 | 556.187   | 0.491 | 0.124 | 3.973 | 7.1E-05 | 0.000345   | Ahsa2         |
| ENSMUSG00000004451 | 12122.296 | 0.491 | 0.066 | 7.402 | 1.3E-13 | 1.6211E-12 | Ralb          |
| ENSMUSG00000109901 | 1465.759  | 0.490 | 0.129 | 3.794 | 1.5E-04 | 0.00068539 | Chmp1b        |
| ENSMUSG00000028822 | 24050.006 | 0.490 | 0.087 | 5.637 | 1.7E-08 | 1.3491E-07 | Tmem50a       |
| ENSMUSG00000005621 | 1408.749  | 0.490 | 0.148 | 3.321 | 9.0E-04 | 0.00358589 | Zfp592        |
| ENSMUSG00000035495 | 1397.849  | 0.490 | 0.150 | 3.271 | 1.1E-03 | 0.00423252 | Tstd2         |
| ENSMUSG00000038806 | 2727.414  | 0.490 | 0.103 | 4.743 | 2.1E-06 | 1.2771E-05 | Sde2          |
| ENSMUSG00000033467 | 10542.126 | 0.490 | 0.095 | 5.149 | 2.6E-07 | 1.774E-06  | Crlf2         |
| ENSMUSG00000024538 | 1788.620  | 0.489 | 0.117 | 4.170 | 3.0E-05 | 0.00015603 | Ppic          |
| ENSMUSG00000028465 | 10850.092 | 0.489 | 0.101 | 4.867 | 1.1E-06 | 7.074E-06  | Tln1          |
| ENSMUSG00000002105 | 3759.882  | 0.488 | 0.114 | 4.272 | 1.9E-05 | 0.00010262 | Slc39a13      |
| ENSMUSG00000113902 | 7087.927  | 0.488 | 0.120 | 4.082 | 4.5E-05 | 0.00022475 | Ndufb1        |
| ENSMUSG00000017707 | 8660.637  | 0.488 | 0.104 | 4.693 | 2.7E-06 | 1.6085E-05 | Serinc3       |
| ENSMUSG00000032376 | 2285.931  | 0.488 | 0.125 | 3.915 | 9.0E-05 | 0.00043134 | Usp3          |
| ENSMUSG00000026872 | 10807.096 | 0.487 | 0.073 | 6.650 | 2.9E-11 | 2.9331E-10 | Zeb2          |
| ENSMUSG00000063727 | 3107.624  | 0.487 | 0.161 | 3.027 | 2.5E-03 | 0.00905489 | Tnfrsf11b     |
| ENSMUSG00000026922 | 4458.256  | 0.486 | 0.064 | 7.639 | 2.2E-14 | 2.7715E-13 | Agpat2        |
| ENSMUSG00000021585 | 4368.802  | 0.485 | 0.120 | 4.038 | 5.4E-05 | 0.00026783 | Cast          |
| ENSMUSG00000030397 | 2109.614  | 0.484 | 0.103 | 4.722 | 2.3E-06 | 1.4057E-05 | Mark4         |
| ENSMUSG00000005057 | 2824.710  | 0.484 | 0.119 | 4.079 | 4.5E-05 | 0.00022733 | Sh2b2         |
| ENSMUSG00000020149 | 13259.070 | 0.484 | 0.062 | 7.824 | 5.1E-15 | 6.756E-14  | Rab1a         |
| ENSMUSG00000025873 | 2848.169  | 0.484 | 0.123 | 3.921 | 8.8E-05 | 0.00042226 | Faf2          |
| ENSMUSG00000078771 | 8966.495  | 0.483 | 0.136 | 3.562 | 3.7E-04 | 0.00158259 | Evi2a         |
| ENSMUSG00000024659 | 50153.485 | 0.483 | 0.093 | 5.192 | 2.1E-07 | 1.4257E-06 | Anxa1         |
| ENSMUSG00000037095 | 3735.344  | 0.482 | 0.167 | 2.892 | 3.8E-03 | 0.01340537 | Lrg1          |
| ENSMUSG00000026171 | 1083.015  | 0.482 | 0.155 | 3.103 | 1.9E-03 | 0.00718508 | Rnf25         |
| ENSMUSG00000049562 | 3739.272  | 0.481 | 0.137 | 3.502 | 4.6E-04 | 0.00195094 | Ap5b1         |
| ENSMUSG00000001911 | 1090.833  | 0.481 | 0.131 | 3.661 | 2.5E-04 | 0.00111543 | Nfix          |
| ENSMUSG00000032035 | 2051.277  | 0.481 | 0.131 | 3.663 | 2.5E-04 | 0.0011092  | Ets1          |
| ENSMUSG00000026289 | 2260.875  | 0.480 | 0.146 | 3.296 | 9.8E-04 | 0.00389025 | Atg16l1       |
| ENSMUSG00000033294 | 3233.835  | 0.479 | 0.082 | 5.869 | 4.4E-09 | 3.6513E-08 | Noc4l         |
| ENSMUSG00000097603 | 200.806   | 0.479 | 0.170 | 2.825 | 4.7E-03 | 0.01626105 | A430010J10Rik |
| ENSMUSG00000018736 | 8976.785  | 0.479 | 0.070 | 6.874 | 6.3E-12 | 6.5977E-11 | Ndel1         |
| ENSMUSG00000032193 | 3697.126  | 0.478 | 0.128 | 3.751 | 1.8E-04 | 0.00080275 | Ldlr          |
| ENSMUSG00000035158 | 2652.430  | 0.478 | 0.130 | 3.667 | 2.5E-04 | 0.00109384 | Mitf          |
| ENSMUSG00000064147 | 1277.003  | 0.478 | 0.140 | 3.411 | 6.5E-04 | 0.00265601 | Rab44         |
| ENSMUSG00000030786 | 3426.905  | 0.477 | 0.103 | 4.622 | 3.8E-06 | 2.2312E-05 | Itgam         |
| ENSMUSG00000019054 | 8596.153  | 0.477 | 0.088 | 5.409 | 6.4E-08 | 4.6473E-07 | Fis1          |
| ENSMUSG00000107286 | 193.583   | 0.477 | 0.189 | 2.529 | 1.1E-02 | 0.03527472 | Gm43788       |

|                     |           |       |       |       |         |            |           |
|---------------------|-----------|-------|-------|-------|---------|------------|-----------|
| ENSMUSG00000018040  | 3882.916  | 0.477 | 0.088 | 5.433 | 5.5E-08 | 4.0782E-07 | Rrp7a     |
| ENSMUSG00000024937  | 18609.610 | 0.477 | 0.093 | 5.111 | 3.2E-07 | 2.1438E-06 | Ehbp111   |
| ENSMUSG00000029649  | 12901.065 | 0.477 | 0.068 | 7.003 | 2.5E-12 | 2.737E-11  | Pomp      |
| ENSMUSG00000032475  | 2690.388  | 0.477 | 0.103 | 4.648 | 3.4E-06 | 1.9825E-05 | Nck1      |
| ENSMUSG00000040021  | 1516.553  | 0.476 | 0.122 | 3.890 | 1.0E-04 | 0.00047547 | Lats1     |
| ENSMUSG00000020897  | 1396.408  | 0.475 | 0.135 | 3.525 | 4.2E-04 | 0.00179961 | Aurkb     |
| ENSMUSG00000003527  | 2075.615  | 0.475 | 0.103 | 4.622 | 3.8E-06 | 2.2349E-05 | Ess2      |
| ENSMUSG00000020220  | 842.550   | 0.475 | 0.139 | 3.426 | 6.1E-04 | 0.00252662 | Vps13d    |
| ENSMUSG00000048970  | 1993.413  | 0.474 | 0.124 | 3.821 | 1.3E-04 | 0.00061937 | C1galt1c1 |
| ENSMUSG00000032977  | 3358.167  | 0.474 | 0.104 | 4.554 | 5.3E-06 | 3.0201E-05 | Fam207a   |
| ENSMUSG00000026761  | 1978.264  | 0.474 | 0.126 | 3.762 | 1.7E-04 | 0.00077253 | Orc4      |
| ENSMUSG00000026987  | 2363.598  | 0.474 | 0.120 | 3.965 | 7.4E-05 | 0.00035682 | Baz2b     |
| ENSMUSG00000040097  | 1245.962  | 0.474 | 0.174 | 2.728 | 6.4E-03 | 0.02111414 | Flywhc1   |
| ENSMUSG00000046768  | 490.148   | 0.473 | 0.195 | 2.423 | 1.5E-02 | 0.04576702 | Rhoj      |
| ENSMUSG00000020801  | 615.815   | 0.473 | 0.147 | 3.218 | 1.3E-03 | 0.00502269 | Med31     |
| ENSMUSG00000024976  | 3154.347  | 0.472 | 0.113 | 4.182 | 2.9E-05 | 0.00014907 | Shoc2     |
| ENSMUSG00000075327  | 866.663   | 0.472 | 0.173 | 2.736 | 6.2E-03 | 0.02067819 | Zbtb2     |
| ENSMUSG00000040511  | 2367.238  | 0.472 | 0.122 | 3.864 | 1.1E-04 | 0.00052579 | Pvr       |
| ENSMUSG00000057335  | 2428.806  | 0.471 | 0.132 | 3.576 | 3.5E-04 | 0.00150821 | Cep170    |
| ENSMUSG00000031197  | 3907.443  | 0.471 | 0.077 | 6.140 | 8.2E-10 | 7.3248E-09 | Vbp1      |
| ENSMUSG00000021866  | 6175.670  | 0.470 | 0.088 | 5.362 | 8.2E-08 | 5.9502E-07 | Anxa11    |
| ENSMUSG00000075702  | 1058.126  | 0.470 | 0.147 | 3.193 | 1.4E-03 | 0.00542541 | Selenom   |
| ENSMUSG00000026239  | 1695.385  | 0.470 | 0.121 | 3.896 | 9.8E-05 | 0.0004644  | Pde6d     |
| ENSMUSG00000015474  | 1996.061  | 0.470 | 0.098 | 4.800 | 1.6E-06 | 9.7433E-06 | Ppt2      |
| ENSMUSG00000032097  | 1415.653  | 0.469 | 0.115 | 4.094 | 4.2E-05 | 0.00021316 | Ddx6      |
| ENSMUSG00000044042  | 977.594   | 0.468 | 0.159 | 2.950 | 3.2E-03 | 0.01138789 | Fmn1      |
| ENSMUSG00000015305  | 2284.189  | 0.467 | 0.152 | 3.082 | 2.1E-03 | 0.00767775 | Sash1     |
| ENSMUSG00000024576  | 10287.139 | 0.467 | 0.076 | 6.126 | 9.0E-10 | 7.9734E-09 | Csnk1a1   |
| ENSMUSG00000018076  | 5666.794  | 0.467 | 0.131 | 3.571 | 3.6E-04 | 0.00153382 | Med131    |
| ENSMUSG00000023994  | 1021.630  | 0.467 | 0.157 | 2.979 | 2.9E-03 | 0.01045863 | Nfya      |
| ENSMUSG00000005779  | 7707.684  | 0.467 | 0.055 | 8.510 | 1.7E-17 | 2.7209E-16 | Psmb4     |
| ENSMUSG000000081306 | 3193.661  | 0.466 | 0.098 | 4.781 | 1.7E-06 | 1.0689E-05 | Gm15266   |
| ENSMUSG00000023827  | 2418.119  | 0.466 | 0.129 | 3.614 | 3.0E-04 | 0.0013188  | Agpat4    |
| ENSMUSG00000022200  | 4715.961  | 0.466 | 0.074 | 6.294 | 3.1E-10 | 2.8576E-09 | Golph3    |
| ENSMUSG00000024283  | 5064.856  | 0.466 | 0.093 | 5.026 | 5.0E-07 | 3.2652E-06 | Wac       |
| ENSMUSG00000029776  | 4449.590  | 0.465 | 0.116 | 4.012 | 6.0E-05 | 0.00029662 | Hibadh    |
| ENSMUSG00000026436  | 719.605   | 0.465 | 0.161 | 2.894 | 3.8E-03 | 0.01333171 | Elk4      |
| ENSMUSG00000039231  | 712.023   | 0.465 | 0.137 | 3.394 | 6.9E-04 | 0.00281251 | Suv39h1   |
| ENSMUSG00000020914  | 2990.365  | 0.465 | 0.087 | 5.346 | 9.0E-08 | 6.4406E-07 | Top2a     |
| ENSMUSG00000031004  | 1182.738  | 0.464 | 0.141 | 3.300 | 9.7E-04 | 0.00385064 | Mki67     |
| ENSMUSG00000042688  | 7563.079  | 0.464 | 0.086 | 5.374 | 7.7E-08 | 5.5684E-07 | Mapk6     |
| ENSMUSG00000005161  | 8400.827  | 0.463 | 0.088 | 5.264 | 1.4E-07 | 9.8999E-07 | Prdx2     |
| ENSMUSG00000028759  | 5058.116  | 0.463 | 0.147 | 3.156 | 1.6E-03 | 0.00609018 | Hp1bp3    |
| ENSMUSG00000030750  | 2158.674  | 0.463 | 0.110 | 4.203 | 2.6E-05 | 0.00013639 | Nsmce1    |
| ENSMUSG00000021076  | 4462.526  | 0.461 | 0.081 | 5.662 | 1.5E-08 | 1.1686E-07 | Actr10    |
| ENSMUSG00000058672  | 8875.830  | 0.461 | 0.084 | 5.459 | 4.8E-08 | 3.5559E-07 | Tubb2a    |
| ENSMUSG00000070372  | 5651.046  | 0.460 | 0.089 | 5.186 | 2.2E-07 | 1.4732E-06 | Capza1    |
| ENSMUSG00000039221  | 330.742   | 0.459 | 0.160 | 2.863 | 4.2E-03 | 0.01456635 | Rpl2211   |
| ENSMUSG000000084060 | 220.515   | 0.459 | 0.160 | 2.860 | 4.2E-03 | 0.01469507 | Gm16412   |
| ENSMUSG000000000743 | 10326.677 | 0.459 | 0.083 | 5.539 | 3.0E-08 | 2.3046E-07 | Chmp1a    |
| ENSMUSG00000027936  | 3307.905  | 0.458 | 0.105 | 4.386 | 1.2E-05 | 6.3379E-05 | Crtc2     |
| ENSMUSG00000025132  | 47566.410 | 0.458 | 0.058 | 7.964 | 1.7E-15 | 2.2619E-14 | Arhgdia   |

|                     |           |       |       |       |         |            |               |
|---------------------|-----------|-------|-------|-------|---------|------------|---------------|
| ENSMUSG00000026203  | 1116.785  | 0.457 | 0.163 | 2.802 | 5.1E-03 | 0.01733276 | Dnajb2        |
| ENSMUSG00000047417  | 3164.175  | 0.457 | 0.100 | 4.560 | 5.1E-06 | 2.9464E-05 | Rexo1         |
| ENSMUSG00000054387  | 2062.495  | 0.457 | 0.118 | 3.865 | 1.1E-04 | 0.00052317 | Mdm4          |
| ENSMUSG00000005803  | 3701.955  | 0.456 | 0.082 | 5.539 | 3.0E-08 | 2.3079E-07 | Sqor          |
| ENSMUSG00000020840  | 3245.482  | 0.456 | 0.098 | 4.645 | 3.4E-06 | 2.0123E-05 | Blmh          |
| ENSMUSG00000003033  | 6112.782  | 0.456 | 0.079 | 5.767 | 8.1E-09 | 6.4799E-08 | Ap1m1         |
| ENSMUSG000000031723 | 2223.940  | 0.454 | 0.126 | 3.590 | 3.3E-04 | 0.00143489 | Txn14b        |
| ENSMUSG00000000134  | 9402.682  | 0.454 | 0.091 | 5.008 | 5.5E-07 | 3.5603E-06 | Tfe3          |
| ENSMUSG00000004591  | 3573.974  | 0.453 | 0.110 | 4.105 | 4.0E-05 | 0.00020408 | Pkn2          |
| ENSMUSG00000029681  | 4038.074  | 0.453 | 0.091 | 4.981 | 6.3E-07 | 4.076E-06  | Bcl7b         |
| ENSMUSG00000000568  | 3312.520  | 0.453 | 0.115 | 3.952 | 7.7E-05 | 0.00037424 | Hnrnpd        |
| ENSMUSG00000030291  | 1389.755  | 0.452 | 0.121 | 3.727 | 1.9E-04 | 0.00087696 | Med21         |
| ENSMUSG00000005813  | 3668.860  | 0.451 | 0.090 | 4.993 | 5.9E-07 | 3.8433E-06 | Metap1        |
| ENSMUSG00000024660  | 1759.738  | 0.451 | 0.117 | 3.842 | 1.2E-04 | 0.00057193 | Incenp        |
| ENSMUSG00000030867  | 1348.155  | 0.450 | 0.159 | 2.838 | 4.5E-03 | 0.01565894 | Plk1          |
| ENSMUSG00000040297  | 1095.203  | 0.450 | 0.103 | 4.380 | 1.2E-05 | 6.4871E-05 | Suco          |
| ENSMUSG00000043542  | 1149.664  | 0.449 | 0.174 | 2.585 | 9.7E-03 | 0.03048478 | Zc2hc1a       |
| ENSMUSG00000021486  | 12133.263 | 0.449 | 0.072 | 6.212 | 5.2E-10 | 4.6987E-09 | Prelid1       |
| ENSMUSG00000015750  | 926.761   | 0.449 | 0.138 | 3.249 | 1.2E-03 | 0.00454476 | Aph1a         |
| ENSMUSG00000033416  | 1800.485  | 0.448 | 0.133 | 3.382 | 7.2E-04 | 0.0029244  | Gucd1         |
| ENSMUSG00000031858  | 3660.852  | 0.448 | 0.094 | 4.770 | 1.8E-06 | 1.1233E-05 | Mau2          |
| ENSMUSG00000021975  | 1761.967  | 0.448 | 0.136 | 3.288 | 1.0E-03 | 0.00400232 | Ints9         |
| ENSMUSG00000042572  | 4117.408  | 0.448 | 0.112 | 3.994 | 6.5E-05 | 0.00031864 | Ube2q1        |
| ENSMUSG00000034765  | 2689.566  | 0.448 | 0.134 | 3.350 | 8.1E-04 | 0.00326282 | Dusp5         |
| ENSMUSG00000024456  | 2346.198  | 0.447 | 0.127 | 3.512 | 4.5E-04 | 0.00188397 | Diaph1        |
| ENSMUSG00000004934  | 4361.948  | 0.447 | 0.119 | 3.769 | 1.6E-04 | 0.00075218 | Pias4         |
| ENSMUSG00000036478  | 23977.448 | 0.447 | 0.101 | 4.449 | 8.6E-06 | 4.8328E-05 | Btg1          |
| ENSMUSG00000020330  | 666.740   | 0.447 | 0.173 | 2.580 | 9.9E-03 | 0.03092415 | Hmmr          |
| ENSMUSG00000003161  | 11469.479 | 0.447 | 0.062 | 7.233 | 4.7E-13 | 5.4593E-12 | Sri           |
| ENSMUSG00000059890  | 1676.148  | 0.447 | 0.144 | 3.104 | 1.9E-03 | 0.00717256 | Ube4a         |
| ENSMUSG00000022130  | 1144.220  | 0.446 | 0.144 | 3.105 | 1.9E-03 | 0.00715062 | Tgds          |
| ENSMUSG00000006699  | 44468.732 | 0.446 | 0.063 | 7.018 | 2.2E-12 | 2.4671E-11 | Cdc42         |
| ENSMUSG00000025354  | 4248.229  | 0.444 | 0.099 | 4.478 | 7.5E-06 | 4.2613E-05 | Dnajc14       |
| ENSMUSG00000064145  | 2106.587  | 0.444 | 0.137 | 3.249 | 1.2E-03 | 0.00455228 | Arih2         |
| ENSMUSG00000072235  | 3044.474  | 0.443 | 0.101 | 4.402 | 1.1E-05 | 5.9132E-05 | Tubal1a       |
| ENSMUSG00000004446  | 3869.796  | 0.443 | 0.086 | 5.138 | 2.8E-07 | 1.8763E-06 | Bid           |
| ENSMUSG00000052593  | 12600.878 | 0.443 | 0.095 | 4.642 | 3.5E-06 | 2.0406E-05 | Adam17        |
| ENSMUSG00000074743  | 3889.122  | 0.442 | 0.134 | 3.296 | 9.8E-04 | 0.00389251 | Thbd          |
| ENSMUSG00000073471  | 218.079   | 0.442 | 0.174 | 2.537 | 1.1E-02 | 0.03451757 | Rsph3a        |
| ENSMUSG00000027479  | 17232.139 | 0.442 | 0.066 | 6.699 | 2.1E-11 | 2.123E-10  | Mapre1        |
| ENSMUSG00000006169  | 6988.154  | 0.442 | 0.105 | 4.228 | 2.4E-05 | 0.00012322 | Clint1        |
| ENSMUSG00000002028  | 1076.893  | 0.442 | 0.133 | 3.316 | 9.1E-04 | 0.00364493 | Kmt2a         |
| ENSMUSG00000026628  | 21470.968 | 0.442 | 0.150 | 2.946 | 3.2E-03 | 0.01149896 | Atf3          |
| ENSMUSG00000018001  | 4110.057  | 0.441 | 0.093 | 4.726 | 2.3E-06 | 1.3832E-05 | Cyth3         |
| ENSMUSG00000026701  | 31080.476 | 0.441 | 0.091 | 4.843 | 1.3E-06 | 7.954E-06  | Prdx6         |
| ENSMUSG00000025066  | 7723.190  | 0.441 | 0.073 | 5.997 | 2.0E-09 | 1.7246E-08 | Sfr1          |
| ENSMUSG00000035529  | 2105.802  | 0.440 | 0.085 | 5.169 | 2.3E-07 | 1.6014E-06 | Prdm4         |
| ENSMUSG00000035171  | 325.037   | 0.439 | 0.155 | 2.830 | 4.7E-03 | 0.01601879 | 1110059E24Rik |
| ENSMUSG00000044155  | 1997.278  | 0.439 | 0.118 | 3.708 | 2.1E-04 | 0.00094148 | Lsm8          |
| ENSMUSG00000029407  | 4317.177  | 0.438 | 0.116 | 3.781 | 1.6E-04 | 0.00071885 | Uso1          |
| ENSMUSG00000020962  | 3350.961  | 0.437 | 0.083 | 5.253 | 1.5E-07 | 1.0478E-06 | Gtf2a1        |
| ENSMUSG00000022951  | 6250.479  | 0.437 | 0.135 | 3.238 | 1.2E-03 | 0.00470174 | Rcan1         |

|                     |            |       |       |       |         |            |             |
|---------------------|------------|-------|-------|-------|---------|------------|-------------|
| ENSMUSG00000037349  | 745.635    | 0.437 | 0.176 | 2.478 | 1.3E-02 | 0.04001045 | Nudt22      |
| ENSMUSG00000031529  | 2523.446   | 0.436 | 0.133 | 3.277 | 1.1E-03 | 0.00414944 | Tnks        |
| ENSMUSG00000029190  | 1261.086   | 0.436 | 0.117 | 3.741 | 1.8E-04 | 0.00083464 | D5Erttd579e |
| ENSMUSG00000027361  | 1754.549   | 0.435 | 0.130 | 3.337 | 8.5E-04 | 0.00340396 | Gabpb1      |
| ENSMUSG00000030423  | 1828.516   | 0.434 | 0.094 | 4.608 | 4.1E-06 | 2.3832E-05 | Pop4        |
| ENSMUSG00000007041  | 39965.476  | 0.434 | 0.085 | 5.082 | 3.7E-07 | 2.4784E-06 | Clic1       |
| ENSMUSG00000047731  | 5008.328   | 0.433 | 0.118 | 3.661 | 2.5E-04 | 0.00111771 | Wbp11       |
| ENSMUSG00000048175  | 2388.834   | 0.433 | 0.119 | 3.629 | 2.8E-04 | 0.00125402 | Asb8        |
| ENSMUSG00000031960  | 7151.668   | 0.433 | 0.095 | 4.573 | 4.8E-06 | 2.7849E-05 | Aars        |
| ENSMUSG00000028848  | 960.032    | 0.432 | 0.166 | 2.602 | 9.3E-03 | 0.02927549 | Gpn2        |
| ENSMUSG00000026478  | 1199.780   | 0.432 | 0.144 | 3.007 | 2.6E-03 | 0.00960183 | Lamc1       |
| ENSMUSG00000018442  | 6593.578   | 0.432 | 0.063 | 6.882 | 5.9E-12 | 6.2511E-11 | Der12       |
| ENSMUSG000000114608 | 654.983    | 0.432 | 0.170 | 2.541 | 1.1E-02 | 0.03413964 | Gm36161     |
| ENSMUSG00000061778  | 1891.328   | 0.432 | 0.139 | 3.108 | 1.9E-03 | 0.0070906  | Mospd2      |
| ENSMUSG00000049658  | 1549.478   | 0.432 | 0.135 | 3.204 | 1.4E-03 | 0.00523663 | Bdp1        |
| ENSMUSG00000031731  | 2406.962   | 0.431 | 0.102 | 4.229 | 2.3E-05 | 0.00012271 | Ap1g1       |
| ENSMUSG00000017221  | 5523.551   | 0.431 | 0.065 | 6.678 | 2.4E-11 | 2.443E-10  | Psm3        |
| ENSMUSG00000052915  | 2120.686   | 0.431 | 0.086 | 5.029 | 4.9E-07 | 3.2063E-06 | Msl1        |
| ENSMUSG00000029725  | 2867.457   | 0.431 | 0.093 | 4.621 | 3.8E-06 | 2.2441E-05 | Ppp1r35     |
| ENSMUSG00000061175  | 2996.022   | 0.430 | 0.161 | 2.668 | 7.6E-03 | 0.02473067 | Fnip2       |
| ENSMUSG00000057666  | 63049.357  | 0.430 | 0.068 | 6.348 | 2.2E-10 | 2.0475E-09 | Gapdh       |
| ENSMUSG00000030760  | 5012.385   | 0.430 | 0.099 | 4.356 | 1.3E-05 | 7.2148E-05 | Acer3       |
| ENSMUSG00000093661  | 1278.177   | 0.430 | 0.146 | 2.953 | 3.1E-03 | 0.01128186 | Eif4e3      |
| ENSMUSG00000023051  | 1298.207   | 0.429 | 0.129 | 3.336 | 8.5E-04 | 0.00340767 | Tarbp2      |
| ENSMUSG00000024290  | 8851.318   | 0.429 | 0.071 | 6.024 | 1.7E-09 | 1.4621E-08 | Rock1       |
| ENSMUSG000000104360 | 460.140    | 0.429 | 0.116 | 3.697 | 2.2E-04 | 0.00097876 | Mif-ps1     |
| ENSMUSG00000040010  | 2335.313   | 0.429 | 0.098 | 4.351 | 1.4E-05 | 7.3548E-05 | Slc7a5      |
| ENSMUSG00000034708  | 114612.160 | 0.428 | 0.108 | 3.960 | 7.5E-05 | 0.00036322 | Grn         |
| ENSMUSG00000025575  | 4571.586   | 0.428 | 0.120 | 3.558 | 3.7E-04 | 0.00160349 | Cant1       |
| ENSMUSG00000060743  | 8110.701   | 0.427 | 0.087 | 4.935 | 8.0E-07 | 5.1068E-06 | H3f3a       |
| ENSMUSG00000021973  | 3076.123   | 0.427 | 0.092 | 4.638 | 3.5E-06 | 2.0775E-05 | Micu2       |
| ENSMUSG00000032469  | 942.892    | 0.427 | 0.142 | 3.004 | 2.7E-03 | 0.00969468 | Dbr1        |
| ENSMUSG00000006335  | 1256.356   | 0.426 | 0.113 | 3.763 | 1.7E-04 | 0.00076839 | Tfpt        |
| ENSMUSG00000018848  | 6414.402   | 0.426 | 0.083 | 5.154 | 2.6E-07 | 1.7323E-06 | Rars        |
| ENSMUSG00000061436  | 1094.355   | 0.426 | 0.178 | 2.392 | 1.7E-02 | 0.04926618 | Hipk2       |
| ENSMUSG00000022570  | 4938.424   | 0.425 | 0.088 | 4.833 | 1.3E-06 | 8.3348E-06 | Gfus        |
| ENSMUSG00000026663  | 2692.684   | 0.425 | 0.115 | 3.688 | 2.3E-04 | 0.001013   | Atf6        |
| ENSMUSG00000026484  | 3241.106   | 0.425 | 0.102 | 4.155 | 3.3E-05 | 0.00016632 | Rnf2        |
| ENSMUSG00000017776  | 6239.728   | 0.425 | 0.096 | 4.428 | 9.5E-06 | 5.2799E-05 | Crk         |
| ENSMUSG00000031264  | 3307.607   | 0.425 | 0.116 | 3.665 | 2.5E-04 | 0.00110043 | Btk         |
| ENSMUSG00000025268  | 1695.352   | 0.424 | 0.116 | 3.658 | 2.5E-04 | 0.00113091 | Maged2      |
| ENSMUSG00000032077  | 842.218    | 0.422 | 0.162 | 2.597 | 9.4E-03 | 0.02957695 | Bud13       |
| ENSMUSG00000009207  | 2003.996   | 0.422 | 0.123 | 3.420 | 6.3E-04 | 0.00257466 | Lnpk        |
| ENSMUSG00000006005  | 9130.360   | 0.421 | 0.090 | 4.705 | 2.5E-06 | 1.5275E-05 | Tpr         |
| ENSMUSG00000051391  | 12506.111  | 0.421 | 0.088 | 4.763 | 1.9E-06 | 1.1591E-05 | Ywhag       |
| ENSMUSG00000020085  | 1550.343   | 0.421 | 0.139 | 3.027 | 2.5E-03 | 0.00905465 | Aifm2       |
| ENSMUSG00000041278  | 3638.377   | 0.420 | 0.080 | 5.244 | 1.6E-07 | 1.0965E-06 | Ttcl        |
| ENSMUSG00000024393  | 3156.272   | 0.420 | 0.106 | 3.966 | 7.3E-05 | 0.00035561 | Prrc2a      |
| ENSMUSG00000025024  | 2492.702   | 0.420 | 0.090 | 4.653 | 3.3E-06 | 1.9433E-05 | Smndc1      |
| ENSMUSG00000001891  | 5023.506   | 0.420 | 0.086 | 4.908 | 9.2E-07 | 5.8261E-06 | Ugp2        |
| ENSMUSG00000041355  | 12226.840  | 0.420 | 0.063 | 6.640 | 3.1E-11 | 3.1363E-10 | Ssr2        |
| ENSMUSG00000039463  | 1932.860   | 0.418 | 0.103 | 4.050 | 5.1E-05 | 0.00025567 | Slc9a8      |



|                     |            |       |       |       |         |            |          |
|---------------------|------------|-------|-------|-------|---------|------------|----------|
| ENSMUSG0000004642   | 3074.377   | 0.418 | 0.091 | 4.596 | 4.3E-06 | 2.5092E-05 | Slbp     |
| ENSMUSG00000012114  | 8700.477   | 0.418 | 0.087 | 4.799 | 1.6E-06 | 9.7828E-06 | Med15    |
| ENSMUSG00000031378  | 3158.780   | 0.417 | 0.122 | 3.430 | 6.0E-04 | 0.00249098 | Abcd1    |
| ENSMUSG00000041836  | 7349.433   | 0.417 | 0.085 | 4.880 | 1.1E-06 | 6.6419E-06 | Ptpre    |
| ENSMUSG00000024610  | 132974.476 | 0.416 | 0.123 | 3.377 | 7.3E-04 | 0.00297953 | Cd74     |
| ENSMUSG00000015839  | 11963.822  | 0.416 | 0.072 | 5.816 | 6.0E-09 | 4.9195E-08 | Nfe212   |
| ENSMUSG00000018008  | 44786.975  | 0.416 | 0.106 | 3.919 | 8.9E-05 | 0.00042536 | Cyth4    |
| ENSMUSG00000037902  | 52965.362  | 0.416 | 0.089 | 4.648 | 3.3E-06 | 1.981E-05  | Sirpa    |
| ENSMUSG00000027739  | 1055.247   | 0.416 | 0.143 | 2.903 | 3.7E-03 | 0.01300399 | Rab33b   |
| ENSMUSG00000037649  | 4156.832   | 0.415 | 0.087 | 4.782 | 1.7E-06 | 1.0638E-05 | H2-DMa   |
| ENSMUSG00000029817  | 3249.685   | 0.415 | 0.104 | 3.992 | 6.6E-05 | 0.00032134 | Tra2a    |
| ENSMUSG00000028955  | 6203.974   | 0.415 | 0.099 | 4.172 | 3.0E-05 | 0.0001548  | Vamp3    |
| ENSMUSG00000035585  | 3345.393   | 0.414 | 0.113 | 3.670 | 2.4E-04 | 0.00108047 | Tsen34   |
| ENSMUSG00000027746  | 3421.684   | 0.414 | 0.079 | 5.252 | 1.5E-07 | 1.055E-06  | Ufm1     |
| ENSMUSG00000019487  | 1813.405   | 0.414 | 0.122 | 3.406 | 6.6E-04 | 0.00270088 | Trip10   |
| ENSMUSG00000031887  | 3506.112   | 0.413 | 0.092 | 4.492 | 7.1E-06 | 3.9984E-05 | Tradd    |
| ENSMUSG00000028322  | 2599.896   | 0.412 | 0.104 | 3.960 | 7.5E-05 | 0.00036311 | Exosc3   |
| ENSMUSG00000035828  | 2304.620   | 0.412 | 0.124 | 3.309 | 9.4E-04 | 0.00373794 | Pim3     |
| ENSMUSG00000038250  | 875.220    | 0.411 | 0.151 | 2.724 | 6.4E-03 | 0.02134633 | Usp38    |
| ENSMUSG00000074247  | 8050.002   | 0.411 | 0.076 | 5.425 | 5.8E-08 | 4.2635E-07 | Ddal     |
| ENSMUSG00000031555  | 6931.695   | 0.411 | 0.118 | 3.481 | 5.0E-04 | 0.00209782 | Adam9    |
| ENSMUSG00000037410  | 1410.295   | 0.410 | 0.159 | 2.573 | 1.0E-02 | 0.03144513 | Tbc1d2b  |
| ENSMUSG00000066151  | 3510.606   | 0.410 | 0.106 | 3.863 | 1.1E-04 | 0.00052803 | Fkbp15   |
| ENSMUSG00000030082  | 14696.628  | 0.409 | 0.075 | 5.481 | 4.2E-08 | 3.1652E-07 | Sec61a1  |
| ENSMUSG00000030697  | 13106.082  | 0.408 | 0.073 | 5.606 | 2.1E-08 | 1.5969E-07 | Ppp4c    |
| ENSMUSG00000021998  | 72406.879  | 0.408 | 0.093 | 4.398 | 1.1E-05 | 6.0221E-05 | Lcp1     |
| ENSMUSG000000110275 | 1206.057   | 0.408 | 0.132 | 3.077 | 2.1E-03 | 0.00777998 | Gm5905   |
| ENSMUSG00000006517  | 1533.246   | 0.408 | 0.166 | 2.448 | 1.4E-02 | 0.04295701 | Mvd      |
| ENSMUSG00000023286  | 5681.774   | 0.407 | 0.073 | 5.609 | 2.0E-08 | 1.5767E-07 | Ube2j2   |
| ENSMUSG00000002748  | 1825.100   | 0.407 | 0.141 | 2.882 | 4.0E-03 | 0.01380955 | Baz1b    |
| ENSMUSG00000004665  | 17672.137  | 0.407 | 0.111 | 3.667 | 2.5E-04 | 0.00109492 | Cnn2     |
| ENSMUSG00000066149  | 1436.781   | 0.407 | 0.084 | 4.866 | 1.1E-06 | 7.1166E-06 | Cdc26    |
| ENSMUSG00000049106  | 820.536    | 0.406 | 0.156 | 2.607 | 9.1E-03 | 0.02888016 | Dcaf5    |
| ENSMUSG00000028886  | 1554.608   | 0.405 | 0.123 | 3.302 | 9.6E-04 | 0.00382262 | Eya3     |
| ENSMUSG00000035181  | 1403.661   | 0.405 | 0.158 | 2.559 | 1.0E-02 | 0.03258719 | Heatr5a  |
| ENSMUSG00000014859  | 5802.643   | 0.404 | 0.081 | 4.993 | 5.9E-07 | 3.8378E-06 | E2f4     |
| ENSMUSG00000006740  | 13496.051  | 0.404 | 0.071 | 5.731 | 1.0E-08 | 7.9557E-08 | Kif5b    |
| ENSMUSG000000050721 | 16600.846  | 0.404 | 0.095 | 4.262 | 2.0E-05 | 0.00010703 | Plekho2  |
| ENSMUSG00000027650  | 1132.447   | 0.404 | 0.156 | 2.589 | 9.6E-03 | 0.03018134 | Tti1     |
| ENSMUSG00000019838  | 11063.525  | 0.403 | 0.109 | 3.710 | 2.1E-04 | 0.00093263 | Slc16a10 |
| ENSMUSG000000107470 | 162.214    | 0.401 | 0.163 | 2.460 | 1.4E-02 | 0.04175165 | Gm3375   |
| ENSMUSG00000028967  | 16393.413  | 0.401 | 0.143 | 2.812 | 4.9E-03 | 0.01685342 | Errfi1   |
| ENSMUSG00000038121  | 768.314    | 0.401 | 0.143 | 2.796 | 5.2E-03 | 0.01762223 | Fam210a  |
| ENSMUSG00000000530  | 4495.432   | 0.400 | 0.115 | 3.471 | 5.2E-04 | 0.00216877 | Acvr1l   |
| ENSMUSG00000025228  | 8501.389   | 0.400 | 0.088 | 4.535 | 5.8E-06 | 3.3055E-05 | Actr1a   |
| ENSMUSG00000035469  | 1528.944   | 0.400 | 0.137 | 2.926 | 3.4E-03 | 0.01218067 | Rcbtb1   |
| ENSMUSG00000002608  | 3291.946   | 0.399 | 0.102 | 3.899 | 9.7E-05 | 0.00045919 | Ccde97   |
| ENSMUSG00000038619  | 5734.957   | 0.399 | 0.082 | 4.856 | 1.2E-06 | 7.4789E-06 | Ensa     |
| ENSMUSG00000032020  | 6753.147   | 0.398 | 0.094 | 4.219 | 2.5E-05 | 0.00012793 | Ubash3b  |
| ENSMUSG000000050144 | 2549.417   | 0.398 | 0.096 | 4.120 | 3.8E-05 | 0.00019181 | Slc25a44 |
| ENSMUSG00000024410  | 3044.104   | 0.397 | 0.118 | 3.355 | 7.9E-04 | 0.00320198 | Rmc1     |
| ENSMUSG00000053950  | 932.393    | 0.397 | 0.160 | 2.483 | 1.3E-02 | 0.03951364 | Adnp2    |

|                    |           |       |       |       |         |            |          |
|--------------------|-----------|-------|-------|-------|---------|------------|----------|
| ENSMUSG0000001017  | 4373.803  | 0.397 | 0.082 | 4.828 | 1.4E-06 | 8.5212E-06 | Chtop    |
| ENSMUSG00000078238 | 566.839   | 0.397 | 0.125 | 3.172 | 1.5E-03 | 0.00580563 | Gm12854  |
| ENSMUSG00000039477 | 1634.740  | 0.396 | 0.138 | 2.865 | 4.2E-03 | 0.01448649 | Tnrc18   |
| ENSMUSG00000024926 | 1749.990  | 0.395 | 0.100 | 3.949 | 7.8E-05 | 0.00037884 | Kat5     |
| ENSMUSG00000029422 | 2881.385  | 0.395 | 0.100 | 3.936 | 8.3E-05 | 0.00039857 | Rsrc2    |
| ENSMUSG00000028042 | 6070.995  | 0.395 | 0.129 | 3.061 | 2.2E-03 | 0.00816931 | Zbtb7b   |
| ENSMUSG00000026249 | 7099.441  | 0.395 | 0.108 | 3.639 | 2.7E-04 | 0.00120882 | Serpine2 |
| ENSMUSG00000021728 | 11630.160 | 0.394 | 0.100 | 3.944 | 8.0E-05 | 0.00038564 | Emb      |
| ENSMUSG00000029363 | 1852.262  | 0.394 | 0.136 | 2.887 | 3.9E-03 | 0.01360047 | Rfc5     |
| ENSMUSG00000068732 | 1510.224  | 0.393 | 0.135 | 2.906 | 3.7E-03 | 0.01290139 | Tmem167b |
| ENSMUSG00000075701 | 9569.601  | 0.392 | 0.057 | 6.856 | 7.1E-12 | 7.4479E-11 | Selenos  |
| ENSMUSG00000027879 | 6159.302  | 0.392 | 0.067 | 5.874 | 4.2E-09 | 3.5297E-08 | Sec22b   |
| ENSMUSG00000010755 | 2796.606  | 0.392 | 0.118 | 3.328 | 8.7E-04 | 0.00350377 | Cars     |
| ENSMUSG00000029064 | 41861.516 | 0.392 | 0.070 | 5.635 | 1.7E-08 | 1.3589E-07 | Gnb1     |
| ENSMUSG00000026223 | 18372.563 | 0.392 | 0.094 | 4.177 | 2.9E-05 | 0.00015174 | Itm2c    |
| ENSMUSG00000003762 | 839.507   | 0.392 | 0.144 | 2.716 | 6.6E-03 | 0.02184825 | Coq8b    |
| ENSMUSG00000041974 | 947.001   | 0.392 | 0.134 | 2.924 | 3.5E-03 | 0.0122556  | Spidr    |
| ENSMUSG00000031583 | 704.649   | 0.391 | 0.146 | 2.676 | 7.5E-03 | 0.02420369 | Wrn      |
| ENSMUSG00000023067 | 95228.926 | 0.391 | 0.125 | 3.139 | 1.7E-03 | 0.00642677 | Cdkn1a   |
| ENSMUSG00000079658 | 6289.524  | 0.391 | 0.079 | 4.966 | 6.8E-07 | 4.3861E-06 | Eloc     |
| ENSMUSG00000087107 | 2325.913  | 0.391 | 0.086 | 4.533 | 5.8E-06 | 3.3336E-05 | Al662270 |
| ENSMUSG00000032531 | 1960.851  | 0.391 | 0.162 | 2.409 | 1.6E-02 | 0.04725447 | Amotl2   |
| ENSMUSG00000025487 | 8580.036  | 0.391 | 0.065 | 5.974 | 2.3E-09 | 1.9617E-08 | Psm13    |
| ENSMUSG00000004054 | 5199.221  | 0.391 | 0.102 | 3.842 | 1.2E-04 | 0.00057135 | Map3k11  |
| ENSMUSG00000012296 | 1464.587  | 0.390 | 0.146 | 2.677 | 7.4E-03 | 0.02412999 | Tjap1    |
| ENSMUSG00000018678 | 2214.489  | 0.390 | 0.120 | 3.261 | 1.1E-03 | 0.00437566 | Sp2      |
| ENSMUSG00000028060 | 3305.284  | 0.389 | 0.065 | 5.983 | 2.2E-09 | 1.8663E-08 | Khdc4    |
| ENSMUSG00000032384 | 3092.239  | 0.389 | 0.140 | 2.772 | 5.6E-03 | 0.01876735 | Csnk1g1  |
| ENSMUSG00000060935 | 1169.362  | 0.389 | 0.141 | 2.758 | 5.8E-03 | 0.019487   | Tmem263  |
| ENSMUSG00000029518 | 3717.501  | 0.388 | 0.076 | 5.085 | 3.7E-07 | 2.4459E-06 | Rab35    |
| ENSMUSG00000034707 | 24706.928 | 0.387 | 0.109 | 3.550 | 3.9E-04 | 0.00165498 | Gns      |
| ENSMUSG00000027466 | 7932.406  | 0.387 | 0.091 | 4.266 | 2.0E-05 | 0.00010535 | Rbck1    |
| ENSMUSG00000029472 | 6828.095  | 0.387 | 0.079 | 4.907 | 9.2E-07 | 5.8321E-06 | Anapc5   |
| ENSMUSG00000026750 | 2010.158  | 0.387 | 0.095 | 4.051 | 5.1E-05 | 0.00025406 | Psmb7    |
| ENSMUSG00000017299 | 2534.421  | 0.386 | 0.091 | 4.234 | 2.3E-05 | 0.00012058 | Dnttip1  |
| ENSMUSG00000035086 | 3408.723  | 0.385 | 0.090 | 4.304 | 1.7E-05 | 8.9699E-05 | Becn1    |
| ENSMUSG00000032059 | 1629.027  | 0.385 | 0.144 | 2.671 | 7.6E-03 | 0.02453039 | Alg9     |
| ENSMUSG00000042744 | 1789.417  | 0.385 | 0.140 | 2.757 | 5.8E-03 | 0.01955255 | Hectd4   |
| ENSMUSG00000052406 | 2576.726  | 0.384 | 0.104 | 3.693 | 2.2E-04 | 0.00099268 | Rexo4    |
| ENSMUSG00000044098 | 892.353   | 0.384 | 0.132 | 2.903 | 3.7E-03 | 0.01298849 | Rsb1     |
| ENSMUSG00000061461 | 2924.803  | 0.383 | 0.118 | 3.244 | 1.2E-03 | 0.00462009 | Smim20   |
| ENSMUSG00000013539 | 3022.381  | 0.382 | 0.112 | 3.425 | 6.2E-04 | 0.00253559 | Tango2   |
| ENSMUSG00000008333 | 2638.232  | 0.382 | 0.101 | 3.768 | 1.6E-04 | 0.00075606 | Snrpb2   |
| ENSMUSG00000031278 | 4965.352  | 0.382 | 0.097 | 3.955 | 7.7E-05 | 0.00037101 | Acs14    |
| ENSMUSG00000047557 | 2110.619  | 0.381 | 0.108 | 3.529 | 4.2E-04 | 0.00177614 | Lxn      |
| ENSMUSG00000030603 | 12953.212 | 0.381 | 0.063 | 6.094 | 1.1E-09 | 9.6344E-09 | Psme4    |
| ENSMUSG00000006050 | 5828.928  | 0.381 | 0.075 | 5.059 | 4.2E-07 | 2.7686E-06 | Sra1     |
| ENSMUSG00000028383 | 1303.197  | 0.381 | 0.132 | 2.895 | 3.8E-03 | 0.01332489 | Hsd12    |
| ENSMUSG00000020664 | 3394.720  | 0.380 | 0.087 | 4.350 | 1.4E-05 | 7.3778E-05 | Dld      |
| ENSMUSG00000029070 | 1199.713  | 0.380 | 0.141 | 2.688 | 7.2E-03 | 0.02345717 | Mxra8    |
| ENSMUSG00000025220 | 3213.705  | 0.380 | 0.127 | 2.994 | 2.8E-03 | 0.01001271 | Oga      |
| ENSMUSG00000027510 | 2474.919  | 0.379 | 0.130 | 2.906 | 3.7E-03 | 0.01288813 | Rbm38    |

|                    |           |       |       |       |         |            |               |
|--------------------|-----------|-------|-------|-------|---------|------------|---------------|
| ENSMUSG00000068335 | 4734.034  | 0.378 | 0.113 | 3.359 | 7.8E-04 | 0.00316288 | Dok1          |
| ENSMUSG00000020803 | 9188.858  | 0.378 | 0.076 | 4.987 | 6.1E-07 | 3.9611E-06 | Txndc17       |
| ENSMUSG00000023048 | 26651.619 | 0.378 | 0.076 | 4.972 | 6.6E-07 | 4.2589E-06 | Prr13         |
| ENSMUSG00000001910 | 2533.957  | 0.377 | 0.137 | 2.757 | 5.8E-03 | 0.0195347  | Nacc1         |
| ENSMUSG00000030822 | 4021.074  | 0.377 | 0.098 | 3.836 | 1.2E-04 | 0.00058416 | Prr14         |
| ENSMUSG00000105987 | 4230.193  | 0.377 | 0.101 | 3.744 | 1.8E-04 | 0.00082398 | AI506816      |
| ENSMUSG00000035851 | 1766.404  | 0.377 | 0.098 | 3.864 | 1.1E-04 | 0.00052631 | Ythdc1        |
| ENSMUSG00000021501 | 2370.352  | 0.377 | 0.109 | 3.469 | 5.2E-04 | 0.0021816  | Caml          |
| ENSMUSG00000037857 | 835.793   | 0.377 | 0.144 | 2.612 | 9.0E-03 | 0.02849004 | Nufip2        |
| ENSMUSG00000074781 | 4030.673  | 0.377 | 0.064 | 5.844 | 5.1E-09 | 4.2E-08    | Ube2n         |
| ENSMUSG00000031065 | 3777.271  | 0.376 | 0.120 | 3.138 | 1.7E-03 | 0.00644258 | Cdk16         |
| ENSMUSG00000027715 | 1648.892  | 0.376 | 0.112 | 3.362 | 7.7E-04 | 0.00312773 | Ccna2         |
| ENSMUSG00000020720 | 9503.343  | 0.376 | 0.072 | 5.254 | 1.5E-07 | 1.0449E-06 | Psmd12        |
| ENSMUSG00000002052 | 1522.732  | 0.376 | 0.141 | 2.664 | 7.7E-03 | 0.02495475 | Supt6         |
| ENSMUSG00000032261 | 2117.349  | 0.376 | 0.144 | 2.609 | 9.1E-03 | 0.02874153 | Sh3bgrl2      |
| ENSMUSG00000021044 | 1073.902  | 0.376 | 0.144 | 2.616 | 8.9E-03 | 0.0282287  | Adek1         |
| ENSMUSG00000004626 | 7773.472  | 0.375 | 0.067 | 5.565 | 2.6E-08 | 2.0036E-07 | Stxbp2        |
| ENSMUSG00000032458 | 8519.370  | 0.375 | 0.072 | 5.218 | 1.8E-07 | 1.2508E-06 | Copb2         |
| ENSMUSG00000049305 | 1131.906  | 0.375 | 0.153 | 2.444 | 1.5E-02 | 0.04340619 | Ccdc71        |
| ENSMUSG00000024006 | 4661.892  | 0.375 | 0.084 | 4.470 | 7.8E-06 | 4.4056E-05 | Stk38         |
| ENSMUSG00000042650 | 9031.770  | 0.374 | 0.072 | 5.232 | 1.7E-07 | 1.1642E-06 | Alkbh5        |
| ENSMUSG00000012117 | 1612.113  | 0.372 | 0.129 | 2.879 | 4.0E-03 | 0.01393612 | Dhdds         |
| ENSMUSG00000018160 | 4042.801  | 0.372 | 0.094 | 3.964 | 7.4E-05 | 0.00035795 | Med1          |
| ENSMUSG00000029163 | 3975.056  | 0.372 | 0.140 | 2.648 | 8.1E-03 | 0.02600271 | Emilin1       |
| ENSMUSG00000020409 | 3383.880  | 0.371 | 0.113 | 3.298 | 9.7E-04 | 0.00386607 | Slu7          |
| ENSMUSG00000040236 | 1904.030  | 0.371 | 0.123 | 3.018 | 2.5E-03 | 0.00931629 | Trappe5       |
| ENSMUSG00000005262 | 3262.717  | 0.371 | 0.074 | 5.034 | 4.8E-07 | 3.1276E-06 | Ufd1          |
| ENSMUSG00000047368 | 2239.264  | 0.371 | 0.103 | 3.594 | 3.3E-04 | 0.00141592 | Abhd17b       |
| ENSMUSG00000031783 | 2995.381  | 0.370 | 0.086 | 4.298 | 1.7E-05 | 9.1979E-05 | Polr2c        |
| ENSMUSG00000006304 | 67491.911 | 0.370 | 0.052 | 7.067 | 1.6E-12 | 1.7587E-11 | Arpc2         |
| ENSMUSG00000021417 | 1701.055  | 0.370 | 0.151 | 2.454 | 1.4E-02 | 0.04243401 | Eci2          |
| ENSMUSG00000030788 | 1793.083  | 0.370 | 0.144 | 2.572 | 1.0E-02 | 0.03151387 | Rnf141        |
| ENSMUSG00000046020 | 918.869   | 0.370 | 0.140 | 2.645 | 8.2E-03 | 0.02621696 | Pofut1        |
| ENSMUSG00000036315 | 1238.394  | 0.370 | 0.094 | 3.915 | 9.0E-05 | 0.00043209 | Polr1h        |
| ENSMUSG00000022635 | 4867.225  | 0.369 | 0.083 | 4.426 | 9.6E-06 | 5.3245E-05 | Zcrl1         |
| ENSMUSG00000015133 | 1095.090  | 0.369 | 0.121 | 3.061 | 2.2E-03 | 0.00818385 | Lrrk1         |
| ENSMUSG00000052748 | 1164.997  | 0.369 | 0.114 | 3.241 | 1.2E-03 | 0.00465874 | Swt1          |
| ENSMUSG00000013736 | 1947.919  | 0.369 | 0.113 | 3.263 | 1.1E-03 | 0.00434003 | Trnt1         |
| ENSMUSG00000022974 | 1229.260  | 0.368 | 0.149 | 2.477 | 1.3E-02 | 0.04006426 | Paxbp1        |
| ENSMUSG00000039148 | 2278.688  | 0.368 | 0.111 | 3.325 | 8.8E-04 | 0.00354079 | Sart1         |
| ENSMUSG00000029185 | 1391.840  | 0.367 | 0.135 | 2.730 | 6.3E-03 | 0.02097523 | Fam114a1      |
| ENSMUSG00000002997 | 3052.662  | 0.367 | 0.125 | 2.928 | 3.4E-03 | 0.01214114 | Prkar2b       |
| ENSMUSG00000032612 | 6396.808  | 0.367 | 0.069 | 5.340 | 9.3E-08 | 6.6485E-07 | Usp4          |
| ENSMUSG00000028233 | 2737.136  | 0.366 | 0.103 | 3.556 | 3.8E-04 | 0.00161762 | Tgs1          |
| ENSMUSG00000025871 | 7096.333  | 0.365 | 0.083 | 4.405 | 1.1E-05 | 5.8204E-05 | 4833439L19Rik |
| ENSMUSG00000053560 | 10287.125 | 0.365 | 0.089 | 4.107 | 4.0E-05 | 0.00020266 | Ier2          |
| ENSMUSG00000024146 | 4513.169  | 0.365 | 0.067 | 5.460 | 4.8E-08 | 3.5242E-07 | Cript         |
| ENSMUSG00000028249 | 97015.072 | 0.364 | 0.100 | 3.640 | 2.7E-04 | 0.0012028  | Sdcbp         |
| ENSMUSG00000009575 | 2142.858  | 0.364 | 0.114 | 3.206 | 1.3E-03 | 0.00520526 | Cbx5          |
| ENSMUSG00000027628 | 2897.507  | 0.363 | 0.113 | 3.219 | 1.3E-03 | 0.00500285 | Aar2          |
| ENSMUSG00000031565 | 2223.330  | 0.362 | 0.142 | 2.557 | 1.1E-02 | 0.03277702 | Fgfr1         |
| ENSMUSG00000112148 | 4184.812  | 0.362 | 0.100 | 3.618 | 3.0E-04 | 0.00130098 | Lilrb4a       |

|                    |            |       |       |       |         |            |               |
|--------------------|------------|-------|-------|-------|---------|------------|---------------|
| ENSMUSG00000027502 | 8213.679   | 0.362 | 0.083 | 4.347 | 1.4E-05 | 7.4862E-05 | Rtf2          |
| ENSMUSG00000034616 | 3642.283   | 0.362 | 0.132 | 2.745 | 6.0E-03 | 0.02015798 | Ssh3          |
| ENSMUSG00000005625 | 15199.898  | 0.362 | 0.072 | 5.011 | 5.4E-07 | 3.5239E-06 | Psmd4         |
| ENSMUSG00000072501 | 4609.508   | 0.361 | 0.084 | 4.317 | 1.6E-05 | 8.4844E-05 | Phf2011       |
| ENSMUSG00000039233 | 1252.047   | 0.361 | 0.088 | 4.097 | 4.2E-05 | 0.00021077 | Tbce          |
| ENSMUSG00000029569 | 3509.204   | 0.361 | 0.119 | 3.038 | 2.4E-03 | 0.00874831 | Tmem168       |
| ENSMUSG00000067787 | 3796.029   | 0.361 | 0.123 | 2.941 | 3.3E-03 | 0.01169817 | Blcap         |
| ENSMUSG00000021262 | 9689.205   | 0.360 | 0.118 | 3.050 | 2.3E-03 | 0.00846087 | Ev1           |
| ENSMUSG00000078671 | 1471.334   | 0.360 | 0.133 | 2.714 | 6.6E-03 | 0.02195089 | Chd2          |
| ENSMUSG00000031600 | 2669.504   | 0.360 | 0.111 | 3.233 | 1.2E-03 | 0.00477999 | Vps37a        |
| ENSMUSG00000042305 | 3658.655   | 0.359 | 0.090 | 3.989 | 6.6E-05 | 0.00032501 | Tmem183a      |
| ENSMUSG00000036513 | 2329.918   | 0.359 | 0.083 | 4.342 | 1.4E-05 | 7.6397E-05 | Commd2        |
| ENSMUSG00000047832 | 2783.191   | 0.359 | 0.086 | 4.166 | 3.1E-05 | 0.00015853 | Cdca4         |
| ENSMUSG00000023852 | 3552.457   | 0.358 | 0.110 | 3.245 | 1.2E-03 | 0.00461381 | Chd1          |
| ENSMUSG00000042406 | 5232.049   | 0.358 | 0.115 | 3.123 | 1.8E-03 | 0.00674705 | Atf4          |
| ENSMUSG00000022255 | 12717.248  | 0.357 | 0.063 | 5.698 | 1.2E-08 | 9.5839E-08 | Mtdh          |
| ENSMUSG00000033128 | 10443.777  | 0.357 | 0.082 | 4.352 | 1.3E-05 | 7.3152E-05 | Ggal          |
| ENSMUSG00000030655 | 2596.981   | 0.357 | 0.124 | 2.870 | 4.1E-03 | 0.01427994 | Smg1          |
| ENSMUSG00000025409 | 1739.249   | 0.356 | 0.133 | 2.671 | 7.6E-03 | 0.02448707 | Mbd6          |
| ENSMUSG00000040822 | 2500.042   | 0.356 | 0.092 | 3.851 | 1.2E-04 | 0.00055103 | 1700123O20Rik |
| ENSMUSG00000030718 | 4732.392   | 0.355 | 0.084 | 4.236 | 2.3E-05 | 0.00011912 | Ppme1         |
| ENSMUSG00000028692 | 103544.769 | 0.355 | 0.079 | 4.504 | 6.7E-06 | 3.7892E-05 | Akr1a1        |
| ENSMUSG00000031513 | 6669.575   | 0.355 | 0.079 | 4.478 | 7.5E-06 | 4.2577E-05 | Leprot11      |
| ENSMUSG00000021428 | 1989.535   | 0.355 | 0.102 | 3.484 | 4.9E-04 | 0.00207064 | Riok1         |
| ENSMUSG00000029729 | 772.978    | 0.354 | 0.135 | 2.629 | 8.6E-03 | 0.02735455 | Zkscan1       |
| ENSMUSG00000003269 | 2348.169   | 0.354 | 0.082 | 4.317 | 1.6E-05 | 8.4892E-05 | Cyth2         |
| ENSMUSG00000027907 | 7076.985   | 0.354 | 0.144 | 2.457 | 1.4E-02 | 0.0420453  | S100a11       |
| ENSMUSG00000049339 | 5348.696   | 0.354 | 0.102 | 3.471 | 5.2E-04 | 0.00216975 | Retreg2       |
| ENSMUSG00000083563 | 967.961    | 0.353 | 0.089 | 3.979 | 6.9E-05 | 0.00033775 | Gm13340       |
| ENSMUSG00000064339 | 174387.760 | 0.352 | 0.094 | 3.737 | 1.9E-04 | 0.000845   | mt-Rnr2       |
| ENSMUSG00000057858 | 928.389    | 0.352 | 0.120 | 2.934 | 3.4E-03 | 0.01192237 | Fam204a       |
| ENSMUSG00000061981 | 4900.620   | 0.352 | 0.079 | 4.468 | 7.9E-06 | 4.4332E-05 | Flot2         |
| ENSMUSG00000050912 | 9158.083   | 0.352 | 0.082 | 4.267 | 2.0E-05 | 0.00010487 | Tmem123       |
| ENSMUSG00000031537 | 5429.084   | 0.351 | 0.104 | 3.389 | 7.0E-04 | 0.00286303 | Ikbkb         |
| ENSMUSG00000029174 | 3441.878   | 0.351 | 0.144 | 2.441 | 1.5E-02 | 0.0437167  | Tbc1d1        |
| ENSMUSG00000021669 | 727.244    | 0.350 | 0.132 | 2.647 | 8.1E-03 | 0.02612312 | Cert1         |
| ENSMUSG00000034674 | 929.196    | 0.350 | 0.129 | 2.720 | 6.5E-03 | 0.02157556 | Tdg           |
| ENSMUSG00000034354 | 3169.219   | 0.349 | 0.105 | 3.325 | 8.9E-04 | 0.00354322 | Mtmr3         |
| ENSMUSG00000039967 | 1423.389   | 0.349 | 0.130 | 2.681 | 7.3E-03 | 0.02385273 | Zfp292        |
| ENSMUSG00000010067 | 2548.515   | 0.348 | 0.098 | 3.542 | 4.0E-04 | 0.00169606 | Rassf1        |
| ENSMUSG00000040842 | 5931.381   | 0.348 | 0.114 | 3.059 | 2.2E-03 | 0.00823418 | Szrd1         |
| ENSMUSG00000037685 | 2338.555   | 0.348 | 0.134 | 2.596 | 9.4E-03 | 0.02972645 | Atp8a1        |
| ENSMUSG00000043733 | 3381.940   | 0.348 | 0.122 | 2.839 | 4.5E-03 | 0.015608   | Ptpn11        |
| ENSMUSG00000032374 | 2026.664   | 0.347 | 0.144 | 2.418 | 1.6E-02 | 0.04623331 | Plod2         |
| ENSMUSG00000008976 | 1612.482   | 0.347 | 0.125 | 2.777 | 5.5E-03 | 0.01852046 | Gabpa         |
| ENSMUSG00000028563 | 3801.484   | 0.347 | 0.088 | 3.961 | 7.5E-05 | 0.00036243 | Tm2d1         |
| ENSMUSG00000022711 | 4253.213   | 0.347 | 0.100 | 3.455 | 5.5E-04 | 0.00229011 | Pmm2          |
| ENSMUSG00000038542 | 2194.890   | 0.346 | 0.122 | 2.838 | 4.5E-03 | 0.01564911 | Pcid2         |
| ENSMUSG00000035778 | 7604.831   | 0.346 | 0.137 | 2.531 | 1.1E-02 | 0.03511194 | Ggta1         |
| ENSMUSG00000029840 | 22012.946  | 0.346 | 0.046 | 7.494 | 6.7E-14 | 8.2667E-13 | Mtpn          |
| ENSMUSG00000066406 | 7001.065   | 0.345 | 0.084 | 4.097 | 4.2E-05 | 0.00021077 | Akap13        |
| ENSMUSG00000073725 | 5993.946   | 0.345 | 0.101 | 3.397 | 6.8E-04 | 0.00278192 | Lmbrd1        |

|                    |           |       |       |       |         |            |          |
|--------------------|-----------|-------|-------|-------|---------|------------|----------|
| ENSMUSG0000009640  | 1456.287  | 0.344 | 0.141 | 2.441 | 1.5E-02 | 0.04380217 | Dmap1    |
| ENSMUSG00000030591 | 19015.468 | 0.344 | 0.073 | 4.728 | 2.3E-06 | 1.3734E-05 | Psmid8   |
| ENSMUSG00000058013 | 5960.880  | 0.343 | 0.098 | 3.496 | 4.7E-04 | 0.0019919  | Septin11 |
| ENSMUSG00000039219 | 1910.266  | 0.343 | 0.138 | 2.486 | 1.3E-02 | 0.0391914  | Arid4b   |
| ENSMUSG00000022500 | 39470.697 | 0.343 | 0.100 | 3.432 | 6.0E-04 | 0.00247524 | Litaf    |
| ENSMUSG00000019795 | 6034.050  | 0.343 | 0.072 | 4.756 | 2.0E-06 | 1.1994E-05 | Pcmt1    |
| ENSMUSG00000031165 | 3007.382  | 0.343 | 0.108 | 3.183 | 1.5E-03 | 0.00561462 | Was      |
| ENSMUSG00000042211 | 4229.335  | 0.343 | 0.086 | 3.981 | 6.9E-05 | 0.00033566 | Fbxo38   |
| ENSMUSG00000020048 | 28317.035 | 0.342 | 0.065 | 5.242 | 1.6E-07 | 1.1088E-06 | Hsp90b1  |
| ENSMUSG00000020903 | 2315.693  | 0.342 | 0.087 | 3.920 | 8.8E-05 | 0.00042317 | Stx8     |
| ENSMUSG00000030884 | 4560.473  | 0.340 | 0.079 | 4.312 | 1.6E-05 | 8.6874E-05 | Uqcrc2   |
| ENSMUSG00000020522 | 3419.630  | 0.340 | 0.095 | 3.584 | 3.4E-04 | 0.00146534 | Mfap3    |
| ENSMUSG00000020088 | 8931.266  | 0.340 | 0.056 | 6.042 | 1.5E-09 | 1.3156E-08 | Sar1a    |
| ENSMUSG00000042625 | 2810.968  | 0.340 | 0.099 | 3.420 | 6.3E-04 | 0.00257466 | Safb2    |
| ENSMUSG00000024002 | 7716.627  | 0.339 | 0.079 | 4.272 | 1.9E-05 | 0.00010278 | Brd4     |
| ENSMUSG00000013662 | 3985.649  | 0.339 | 0.114 | 2.967 | 3.0E-03 | 0.01083295 | Atad1    |
| ENSMUSG00000034088 | 8744.347  | 0.339 | 0.084 | 4.029 | 5.6E-05 | 0.00027696 | Hdlbp    |
| ENSMUSG00000079108 | 371.231   | 0.338 | 0.137 | 2.469 | 1.4E-02 | 0.04084195 | Srp54c   |
| ENSMUSG00000026113 | 2905.351  | 0.337 | 0.116 | 2.911 | 3.6E-03 | 0.01269304 | Inpp4a   |
| ENSMUSG00000029265 | 3503.755  | 0.336 | 0.095 | 3.541 | 4.0E-04 | 0.0017053  | Dr1      |
| ENSMUSG00000038664 | 2134.224  | 0.336 | 0.130 | 2.585 | 9.7E-03 | 0.03049457 | Herc1    |
| ENSMUSG00000015932 | 17717.502 | 0.336 | 0.073 | 4.601 | 4.2E-06 | 2.4555E-05 | Dstn     |
| ENSMUSG00000028436 | 6790.209  | 0.335 | 0.080 | 4.203 | 2.6E-05 | 0.00013639 | Dcaf12   |
| ENSMUSG00000030720 | 9263.864  | 0.335 | 0.079 | 4.242 | 2.2E-05 | 0.00011627 | Cln3     |
| ENSMUSG00000041920 | 1802.938  | 0.334 | 0.132 | 2.527 | 1.2E-02 | 0.03542441 | Slc16a6  |
| ENSMUSG00000024758 | 13028.001 | 0.334 | 0.078 | 4.271 | 1.9E-05 | 0.000103   | Rtn3     |
| ENSMUSG00000040466 | 37125.922 | 0.334 | 0.097 | 3.457 | 5.5E-04 | 0.00227049 | Blvrb    |
| ENSMUSG00000022637 | 1608.976  | 0.333 | 0.119 | 2.796 | 5.2E-03 | 0.01761611 | Cblb     |
| ENSMUSG00000018322 | 5100.185  | 0.333 | 0.093 | 3.598 | 3.2E-04 | 0.0013968  | Tomm34   |
| ENSMUSG00000036977 | 1843.776  | 0.333 | 0.127 | 2.624 | 8.7E-03 | 0.02770187 | Anapc10  |
| ENSMUSG00000036246 | 5320.686  | 0.332 | 0.095 | 3.511 | 4.5E-04 | 0.00188819 | Gmip     |
| ENSMUSG00000038784 | 2715.277  | 0.332 | 0.091 | 3.645 | 2.7E-04 | 0.00118293 | Cnot4    |
| ENSMUSG00000026914 | 8521.397  | 0.332 | 0.062 | 5.318 | 1.0E-07 | 7.4721E-07 | Psmid14  |
| ENSMUSG00000022677 | 2432.679  | 0.332 | 0.093 | 3.564 | 3.6E-04 | 0.00157071 | Cep20    |
| ENSMUSG00000059555 | 4119.393  | 0.331 | 0.119 | 2.780 | 5.4E-03 | 0.01840469 | Tor4a    |
| ENSMUSG00000071072 | 9057.563  | 0.331 | 0.074 | 4.479 | 7.5E-06 | 4.2435E-05 | Ptges3   |
| ENSMUSG00000006333 | 22728.836 | 0.331 | 0.085 | 3.908 | 9.3E-05 | 0.00044455 | Rps9     |
| ENSMUSG00000032580 | 5998.861  | 0.330 | 0.104 | 3.178 | 1.5E-03 | 0.00569977 | Rbm5     |
| ENSMUSG00000026499 | 3773.477  | 0.330 | 0.106 | 3.101 | 1.9E-03 | 0.00723994 | Acbd3    |
| ENSMUSG00000030612 | 1721.365  | 0.329 | 0.132 | 2.489 | 1.3E-02 | 0.03895872 | Mrpl46   |
| ENSMUSG00000001472 | 12097.447 | 0.329 | 0.056 | 5.919 | 3.2E-09 | 2.7231E-08 | Tcf25    |
| ENSMUSG00000044147 | 12714.846 | 0.329 | 0.057 | 5.815 | 6.0E-09 | 4.9465E-08 | Arf6     |
| ENSMUSG00000029227 | 3358.405  | 0.328 | 0.069 | 4.792 | 1.6E-06 | 1.0116E-05 | Fip111   |
| ENSMUSG00000036461 | 5623.270  | 0.328 | 0.121 | 2.700 | 6.9E-03 | 0.02275727 | Elf1     |
| ENSMUSG00000036435 | 2725.526  | 0.328 | 0.099 | 3.312 | 9.3E-04 | 0.00369579 | Exoc1    |
| ENSMUSG00000028899 | 2613.385  | 0.327 | 0.095 | 3.440 | 5.8E-04 | 0.0024102  | Taf12    |
| ENSMUSG00000024942 | 3367.118  | 0.327 | 0.130 | 2.517 | 1.2E-02 | 0.03631008 | Capn1    |
| ENSMUSG00000031021 | 7993.581  | 0.327 | 0.076 | 4.276 | 1.9E-05 | 0.00010097 | Tmem9b   |
| ENSMUSG00000053094 | 6256.046  | 0.327 | 0.082 | 4.006 | 6.2E-05 | 0.0003039  | Tmem248  |
| ENSMUSG00000026977 | 2841.775  | 0.327 | 0.087 | 3.779 | 1.6E-04 | 0.00072418 | Marchf7  |
| ENSMUSG00000019942 | 2438.940  | 0.327 | 0.092 | 3.568 | 3.6E-04 | 0.00155257 | Cdk1     |
| ENSMUSG00000019528 | 5432.462  | 0.327 | 0.085 | 3.826 | 1.3E-04 | 0.00060705 | Gyg      |

|                     |           |       |       |       |         |            |           |
|---------------------|-----------|-------|-------|-------|---------|------------|-----------|
| ENSMUSG00000041319  | 1619.957  | 0.327 | 0.102 | 3.215 | 1.3E-03 | 0.00506668 | Thoc6     |
| ENSMUSG00000039041  | 6124.383  | 0.326 | 0.090 | 3.632 | 2.8E-04 | 0.00123867 | Adrm1     |
| ENSMUSG00000015697  | 1197.564  | 0.326 | 0.127 | 2.567 | 1.0E-02 | 0.03191592 | Setdb1    |
| ENSMUSG00000037608  | 4116.555  | 0.326 | 0.106 | 3.074 | 2.1E-03 | 0.00785827 | Bclaf1    |
| ENSMUSG00000021302  | 2098.397  | 0.325 | 0.115 | 2.813 | 4.9E-03 | 0.01677622 | Ggps1     |
| ENSMUSG00000031774  | 2739.920  | 0.325 | 0.099 | 3.293 | 9.9E-04 | 0.00393259 | Psme3ip1  |
| ENSMUSG00000025484  | 1556.792  | 0.323 | 0.113 | 2.855 | 4.3E-03 | 0.01493013 | Bet11     |
| ENSMUSG00000014361  | 5229.093  | 0.322 | 0.130 | 2.479 | 1.3E-02 | 0.03994058 | Mertk     |
| ENSMUSG00000030216  | 6094.236  | 0.322 | 0.079 | 4.086 | 4.4E-05 | 0.00022071 | Wbp11     |
| ENSMUSG00000024091  | 21565.165 | 0.321 | 0.064 | 5.008 | 5.5E-07 | 3.5719E-06 | Vapa      |
| ENSMUSG00000015092  | 13701.466 | 0.321 | 0.066 | 4.881 | 1.1E-06 | 6.6365E-06 | Edf1      |
| ENSMUSG00000026433  | 2329.087  | 0.320 | 0.115 | 2.791 | 5.2E-03 | 0.01783407 | Rab29     |
| ENSMUSG00000005936  | 4919.026  | 0.320 | 0.073 | 4.377 | 1.2E-05 | 6.5908E-05 | Kctd20    |
| ENSMUSG00000027206  | 2748.183  | 0.320 | 0.099 | 3.244 | 1.2E-03 | 0.00461713 | Cops2     |
| ENSMUSG00000029922  | 8324.832  | 0.320 | 0.084 | 3.824 | 1.3E-04 | 0.00061276 | Mkrn1     |
| ENSMUSG00000018906  | 3855.231  | 0.319 | 0.095 | 3.345 | 8.2E-04 | 0.00332057 | P4ha2     |
| ENSMUSG00000025332  | 5062.798  | 0.319 | 0.101 | 3.142 | 1.7E-03 | 0.00636763 | Kdm5c     |
| ENSMUSG00000029073  | 1465.037  | 0.319 | 0.124 | 2.562 | 1.0E-02 | 0.03238772 | Cptp      |
| ENSMUSG00000045962  | 7979.948  | 0.318 | 0.119 | 2.671 | 7.6E-03 | 0.02450186 | Wnk1      |
| ENSMUSG00000024122  | 1557.272  | 0.317 | 0.099 | 3.214 | 1.3E-03 | 0.00508085 | Pdpk1     |
| ENSMUSG00000024583  | 9829.023  | 0.317 | 0.056 | 5.653 | 1.6E-08 | 1.2283E-07 | Txn11     |
| ENSMUSG00000043311  | 2897.067  | 0.317 | 0.104 | 3.049 | 2.3E-03 | 0.00846526 | D17H6S53E |
| ENSMUSG00000020571  | 22490.044 | 0.316 | 0.065 | 4.884 | 1.0E-06 | 6.5379E-06 | Pdia6     |
| ENSMUSG00000017774  | 9516.398  | 0.316 | 0.117 | 2.695 | 7.0E-03 | 0.02300862 | Myo1c     |
| ENSMUSG00000032557  | 3873.147  | 0.315 | 0.097 | 3.235 | 1.2E-03 | 0.00475476 | Uba5      |
| ENSMUSG00000079057  | 2594.811  | 0.314 | 0.101 | 3.108 | 1.9E-03 | 0.00707655 | Cyp4v3    |
| ENSMUSG00000017716  | 1895.418  | 0.313 | 0.121 | 2.591 | 9.6E-03 | 0.03005568 | Birc5     |
| ENSMUSG00000014959  | 7754.997  | 0.313 | 0.070 | 4.499 | 6.8E-06 | 3.8822E-05 | Gorasp2   |
| ENSMUSG00000041765  | 3413.528  | 0.312 | 0.103 | 3.040 | 2.4E-03 | 0.00870094 | Ubac2     |
| ENSMUSG00000024900  | 6146.857  | 0.312 | 0.096 | 3.251 | 1.1E-03 | 0.00451315 | Cpt1a     |
| ENSMUSG00000038976  | 2862.372  | 0.312 | 0.079 | 3.929 | 8.5E-05 | 0.00040881 | Ppp1r9b   |
| ENSMUSG00000028873  | 2172.870  | 0.312 | 0.108 | 2.877 | 4.0E-03 | 0.01398009 | Cdca8     |
| ENSMUSG00000022204  | 2560.419  | 0.311 | 0.082 | 3.776 | 1.6E-04 | 0.00073383 | Ngdn      |
| ENSMUSG00000036966  | 3399.102  | 0.311 | 0.110 | 2.818 | 4.8E-03 | 0.01656181 | Spryd3    |
| ENSMUSG00000041763  | 4437.490  | 0.311 | 0.110 | 2.818 | 4.8E-03 | 0.01656763 | Tpp2      |
| ENSMUSG00000041235  | 3014.427  | 0.310 | 0.117 | 2.646 | 8.2E-03 | 0.02618701 | Chd7      |
| ENSMUSG00000037791  | 1292.600  | 0.310 | 0.120 | 2.587 | 9.7E-03 | 0.03032943 | Phf12     |
| ENSMUSG00000016946  | 3073.059  | 0.310 | 0.093 | 3.330 | 8.7E-04 | 0.00348808 | Kctd5     |
| ENSMUSG00000003038  | 8553.222  | 0.310 | 0.082 | 3.764 | 1.7E-04 | 0.00076592 | Hmgn2     |
| ENSMUSG00000018820  | 2639.317  | 0.310 | 0.112 | 2.767 | 5.7E-03 | 0.01899917 | Zfyve27   |
| ENSMUSG00000021038  | 3098.798  | 0.310 | 0.127 | 2.433 | 1.5E-02 | 0.04458696 | Vipas39   |
| ENSMUSG00000022201  | 4472.457  | 0.310 | 0.081 | 3.835 | 1.3E-04 | 0.00058779 | Zfr       |
| ENSMUSG00000032178  | 5412.965  | 0.309 | 0.108 | 2.853 | 4.3E-03 | 0.01501625 | Ilf3      |
| ENSMUSG00000059263  | 3616.462  | 0.309 | 0.104 | 2.987 | 2.8E-03 | 0.01022679 | Usp47     |
| ENSMUSG00000020719  | 45702.423 | 0.309 | 0.074 | 4.196 | 2.7E-05 | 0.0001407  | Ddx5      |
| ENSMUSG00000000826  | 6406.167  | 0.308 | 0.081 | 3.818 | 1.3E-04 | 0.00062699 | Dnajc5    |
| ENSMUSG00000032187  | 8626.991  | 0.308 | 0.088 | 3.515 | 4.4E-04 | 0.00186399 | Smarca4   |
| ENSMUSG00000026349  | 2589.963  | 0.308 | 0.103 | 2.982 | 2.9E-03 | 0.01036232 | Ccnt2     |
| ENSMUSG00000018481  | 4203.761  | 0.308 | 0.079 | 3.913 | 9.1E-05 | 0.00043477 | Appbp2    |
| ENSMUSG000000104913 | 790.010   | 0.308 | 0.118 | 2.604 | 9.2E-03 | 0.0291015  | Gm6560    |
| ENSMUSG00000034663  | 7474.855  | 0.308 | 0.126 | 2.448 | 1.4E-02 | 0.04299532 | Bmp2k     |
| ENSMUSG00000007564  | 18540.880 | 0.307 | 0.058 | 5.261 | 1.4E-07 | 1.0028E-06 | Ppp2r1a   |

|                    |            |       |       |       |         |            |         |
|--------------------|------------|-------|-------|-------|---------|------------|---------|
| ENSMUSG00000031532 | 11097.679  | 0.307 | 0.072 | 4.239 | 2.2E-05 | 0.00011765 | Saraf   |
| ENSMUSG00000006276 | 2496.882   | 0.307 | 0.114 | 2.696 | 7.0E-03 | 0.02295867 | Eps1511 |
| ENSMUSG00000032504 | 13884.554  | 0.307 | 0.086 | 3.546 | 3.9E-04 | 0.00167787 | Pcd6ip  |
| ENSMUSG00000024566 | 2952.815   | 0.306 | 0.121 | 2.527 | 1.2E-02 | 0.03542441 | Atp9b   |
| ENSMUSG00000005506 | 6058.581   | 0.306 | 0.093 | 3.308 | 9.4E-04 | 0.00374776 | Celf1   |
| ENSMUSG00000001847 | 14193.538  | 0.306 | 0.089 | 3.440 | 5.8E-04 | 0.0024102  | Rac1    |
| ENSMUSG00000071379 | 8775.202   | 0.305 | 0.080 | 3.818 | 1.3E-04 | 0.00062686 | Hpcal1  |
| ENSMUSG00000026353 | 8730.366   | 0.305 | 0.069 | 4.450 | 8.6E-06 | 4.7998E-05 | Ubxn4   |
| ENSMUSG00000007815 | 24848.241  | 0.305 | 0.058 | 5.300 | 1.2E-07 | 8.2345E-07 | Rhoa    |
| ENSMUSG00000033379 | 38195.975  | 0.304 | 0.055 | 5.552 | 2.8E-08 | 2.1526E-07 | Atp6v0b |
| ENSMUSG00000028232 | 1656.384   | 0.304 | 0.109 | 2.797 | 5.2E-03 | 0.01755117 | Tmem68  |
| ENSMUSG00000028760 | 6497.262   | 0.304 | 0.080 | 3.826 | 1.3E-04 | 0.00060794 | Eif4g3  |
| ENSMUSG00000040760 | 1932.939   | 0.304 | 0.109 | 2.798 | 5.1E-03 | 0.01753441 | Appl1   |
| ENSMUSG00000034342 | 4332.851   | 0.304 | 0.099 | 3.087 | 2.0E-03 | 0.00756232 | Cbl     |
| ENSMUSG00000020248 | 1913.333   | 0.303 | 0.091 | 3.346 | 8.2E-04 | 0.00330832 | Nfyb    |
| ENSMUSG00000018882 | 3430.397   | 0.303 | 0.095 | 3.200 | 1.4E-03 | 0.00531013 | Mrpl45  |
| ENSMUSG00000030695 | 108881.782 | 0.303 | 0.062 | 4.922 | 8.6E-07 | 5.4265E-06 | Aldoa   |
| ENSMUSG00000004843 | 3610.049   | 0.303 | 0.113 | 2.678 | 7.4E-03 | 0.02403746 | Chmp2b  |
| ENSMUSG00000056737 | 55792.567  | 0.303 | 0.081 | 3.758 | 1.7E-04 | 0.00078292 | Capg    |
| ENSMUSG00000030795 | 4061.450   | 0.302 | 0.127 | 2.388 | 1.7E-02 | 0.04967524 | Fus     |
| ENSMUSG00000029528 | 8718.423   | 0.301 | 0.108 | 2.778 | 5.5E-03 | 0.01847056 | Pxn     |
| ENSMUSG00000024400 | 3397.926   | 0.301 | 0.116 | 2.603 | 9.2E-03 | 0.02914386 | Wdr33   |
| ENSMUSG00000074746 | 1286.007   | 0.300 | 0.110 | 2.724 | 6.5E-03 | 0.02136161 | Pdzd8   |
| ENSMUSG00000003119 | 2859.347   | 0.300 | 0.104 | 2.875 | 4.0E-03 | 0.01406654 | Cdk12   |
| ENSMUSG00000020946 | 7577.593   | 0.299 | 0.095 | 3.150 | 1.6E-03 | 0.00621303 | Gosr2   |
| ENSMUSG00000024480 | 5010.075   | 0.299 | 0.068 | 4.426 | 9.6E-06 | 5.3272E-05 | Ap3s1   |
| ENSMUSG00000024672 | 45698.767  | 0.298 | 0.124 | 2.394 | 1.7E-02 | 0.04895288 | Ms4a7   |
| ENSMUSG00000115987 | 6487.034   | 0.297 | 0.082 | 3.615 | 3.0E-04 | 0.00131287 | Vps28   |
| ENSMUSG00000026319 | 2612.689   | 0.297 | 0.083 | 3.568 | 3.6E-04 | 0.00155029 | Relch   |
| ENSMUSG00000047843 | 13947.112  | 0.295 | 0.086 | 3.426 | 6.1E-04 | 0.00252932 | Bri3    |
| ENSMUSG00000030144 | 42884.408  | 0.295 | 0.118 | 2.500 | 1.2E-02 | 0.03784426 | Clec4d  |
| ENSMUSG00000029723 | 13052.036  | 0.295 | 0.079 | 3.715 | 2.0E-04 | 0.00091855 | Tsc22d4 |
| ENSMUSG00000058793 | 2944.125   | 0.295 | 0.107 | 2.758 | 5.8E-03 | 0.01945774 | Cds2    |
| ENSMUSG00000032407 | 3817.890   | 0.294 | 0.094 | 3.123 | 1.8E-03 | 0.00676472 | U2surp  |
| ENSMUSG00000025982 | 12769.063  | 0.294 | 0.076 | 3.897 | 9.7E-05 | 0.00046244 | Sf3b1   |
| ENSMUSG00000023932 | 1729.877   | 0.294 | 0.093 | 3.165 | 1.6E-03 | 0.00593258 | Cdc5l   |
| ENSMUSG00000015672 | 2105.427   | 0.294 | 0.109 | 2.694 | 7.1E-03 | 0.02308596 | Mrpl32  |
| ENSMUSG00000012848 | 19271.786  | 0.293 | 0.079 | 3.699 | 2.2E-04 | 0.00096959 | Rps5    |
| ENSMUSG00000021395 | 2692.545   | 0.293 | 0.090 | 3.276 | 1.1E-03 | 0.00416201 | Spin1   |
| ENSMUSG00000063200 | 4381.957   | 0.293 | 0.087 | 3.359 | 7.8E-04 | 0.00316118 | Nol7    |
| ENSMUSG00000042642 | 1682.779   | 0.293 | 0.096 | 3.044 | 2.3E-03 | 0.00859696 | Flad1   |
| ENSMUSG00000025192 | 2133.333   | 0.292 | 0.117 | 2.492 | 1.3E-02 | 0.03863358 | Entpd7  |
| ENSMUSG00000031010 | 4798.677   | 0.292 | 0.102 | 2.848 | 4.4E-03 | 0.01523969 | Usp9x   |
| ENSMUSG00000026553 | 13754.530  | 0.291 | 0.104 | 2.789 | 5.3E-03 | 0.01790861 | Copa    |
| ENSMUSG00000050079 | 2715.680   | 0.291 | 0.105 | 2.759 | 5.8E-03 | 0.01941792 | Rspry1  |
| ENSMUSG00000037266 | 18987.982  | 0.290 | 0.106 | 2.733 | 6.3E-03 | 0.02085013 | Rsrp1   |
| ENSMUSG00000002205 | 2703.107   | 0.290 | 0.089 | 3.272 | 1.1E-03 | 0.00421948 | Vrk3    |
| ENSMUSG00000079562 | 7140.735   | 0.290 | 0.078 | 3.709 | 2.1E-04 | 0.0009358  | Maea    |
| ENSMUSG00000035078 | 1836.285   | 0.290 | 0.111 | 2.616 | 8.9E-03 | 0.02823276 | Mtmr9   |
| ENSMUSG00000028416 | 13804.877  | 0.289 | 0.087 | 3.340 | 8.4E-04 | 0.00337019 | Bag1    |
| ENSMUSG00000031201 | 1674.375   | 0.289 | 0.109 | 2.661 | 7.8E-03 | 0.02516189 | Brcc3   |
| ENSMUSG00000029048 | 8508.816   | 0.289 | 0.069 | 4.152 | 3.3E-05 | 0.00016815 | Rer1    |

|                    |            |       |       |       |         |            |          |
|--------------------|------------|-------|-------|-------|---------|------------|----------|
| ENSMUSG00000033623 | 1539.460   | 0.288 | 0.116 | 2.472 | 1.3E-02 | 0.04050786 | Pcgf3    |
| ENSMUSG00000041264 | 1835.430   | 0.287 | 0.111 | 2.589 | 9.6E-03 | 0.03019671 | Usp11    |
| ENSMUSG00000032212 | 3188.005   | 0.287 | 0.098 | 2.925 | 3.4E-03 | 0.01222152 | Sltm     |
| ENSMUSG00000011752 | 2974.158   | 0.287 | 0.100 | 2.862 | 4.2E-03 | 0.01463854 | Pgam1    |
| ENSMUSG00000039367 | 5262.072   | 0.287 | 0.101 | 2.844 | 4.4E-03 | 0.01538494 | Sec24c   |
| ENSMUSG00000028868 | 9007.348   | 0.286 | 0.081 | 3.528 | 4.2E-04 | 0.00178047 | Wasf2    |
| ENSMUSG00000020109 | 2329.160   | 0.286 | 0.114 | 2.501 | 1.2E-02 | 0.03773226 | Dnajb12  |
| ENSMUSG00000020311 | 1686.296   | 0.286 | 0.096 | 2.984 | 2.8E-03 | 0.01028442 | Erlec1   |
| ENSMUSG00000047180 | 6147.533   | 0.286 | 0.111 | 2.567 | 1.0E-02 | 0.03196881 | Neurl3   |
| ENSMUSG00000023104 | 3275.472   | 0.286 | 0.084 | 3.397 | 6.8E-04 | 0.00277952 | Rfc2     |
| ENSMUSG00000019432 | 7151.959   | 0.286 | 0.060 | 4.782 | 1.7E-06 | 1.0629E-05 | Ddx39b   |
| ENSMUSG00000029752 | 3869.962   | 0.285 | 0.092 | 3.104 | 1.9E-03 | 0.00717338 | Asns     |
| ENSMUSG00000028126 | 1738.987   | 0.285 | 0.117 | 2.436 | 1.5E-02 | 0.04430884 | Pip5k1a  |
| ENSMUSG00000031590 | 3891.431   | 0.284 | 0.075 | 3.789 | 1.5E-04 | 0.00069836 | Frg1     |
| ENSMUSG00000060038 | 2325.069   | 0.283 | 0.102 | 2.771 | 5.6E-03 | 0.01883082 | Dhps     |
| ENSMUSG00000013822 | 4289.028   | 0.283 | 0.098 | 2.888 | 3.9E-03 | 0.0135776  | Elof1    |
| ENSMUSG00000027447 | 52615.412  | 0.283 | 0.096 | 2.941 | 3.3E-03 | 0.0116645  | Cst3     |
| ENSMUSG00000030007 | 14204.871  | 0.283 | 0.067 | 4.229 | 2.3E-05 | 0.00012284 | Cct7     |
| ENSMUSG00000034832 | 4130.346   | 0.282 | 0.107 | 2.641 | 8.3E-03 | 0.0264784  | Tet3     |
| ENSMUSG00000060708 | 2315.489   | 0.282 | 0.116 | 2.434 | 1.5E-02 | 0.04449193 | Bloc1s4  |
| ENSMUSG00000038412 | 3311.961   | 0.280 | 0.110 | 2.555 | 1.1E-02 | 0.03297895 | Higd1a   |
| ENSMUSG00000039770 | 6807.265   | 0.280 | 0.091 | 3.079 | 2.1E-03 | 0.00774569 | Ypel5    |
| ENSMUSG00000063801 | 1617.782   | 0.280 | 0.110 | 2.545 | 1.1E-02 | 0.03385956 | Ap3s2    |
| ENSMUSG00000046836 | 3035.394   | 0.279 | 0.107 | 2.616 | 8.9E-03 | 0.02823465 | Brox     |
| ENSMUSG00000038462 | 8394.712   | 0.278 | 0.078 | 3.584 | 3.4E-04 | 0.00146523 | Uqcrfs1  |
| ENSMUSG00000021484 | 14078.893  | 0.278 | 0.047 | 5.943 | 2.8E-09 | 2.3637E-08 | Lman2    |
| ENSMUSG00000021832 | 6317.040   | 0.277 | 0.071 | 3.905 | 9.4E-05 | 0.00044918 | Psmc6    |
| ENSMUSG00000046805 | 16159.431  | 0.277 | 0.094 | 2.962 | 3.1E-03 | 0.01097532 | Mpeg1    |
| ENSMUSG00000028902 | 3272.375   | 0.277 | 0.103 | 2.694 | 7.1E-03 | 0.02308341 | Sf3a3    |
| ENSMUSG00000043962 | 3566.755   | 0.277 | 0.086 | 3.228 | 1.2E-03 | 0.00485715 | Thrap3   |
| ENSMUSG00000029004 | 4944.043   | 0.276 | 0.096 | 2.875 | 4.0E-03 | 0.0140847  | Kmt2e    |
| ENSMUSG00000001416 | 13170.757  | 0.276 | 0.068 | 4.090 | 4.3E-05 | 0.00021741 | Cct3     |
| ENSMUSG00000041629 | 5472.312   | 0.276 | 0.106 | 2.600 | 9.3E-03 | 0.02935005 | Fam104a  |
| ENSMUSG00000034341 | 13809.192  | 0.276 | 0.065 | 4.247 | 2.2E-05 | 0.00011386 | Wbp2     |
| ENSMUSG00000029198 | 6409.827   | 0.275 | 0.078 | 3.527 | 4.2E-04 | 0.00178746 | Grpel1   |
| ENSMUSG00000050812 | 1924.248   | 0.275 | 0.111 | 2.471 | 1.3E-02 | 0.04066676 | Ecpas    |
| ENSMUSG00000022185 | 1825.556   | 0.275 | 0.088 | 3.133 | 1.7E-03 | 0.00655108 | Acin1    |
| ENSMUSG00000004771 | 14646.536  | 0.274 | 0.085 | 3.216 | 1.3E-03 | 0.00504131 | Rab11a   |
| ENSMUSG00000026150 | 4681.948   | 0.274 | 0.058 | 4.706 | 2.5E-06 | 1.5204E-05 | Mff      |
| ENSMUSG00000022808 | 8699.716   | 0.274 | 0.090 | 3.037 | 2.4E-03 | 0.00878732 | Snx4     |
| ENSMUSG00000030779 | 2392.993   | 0.274 | 0.103 | 2.666 | 7.7E-03 | 0.02483511 | Rbbp6    |
| ENSMUSG00000026355 | 4341.971   | 0.273 | 0.082 | 3.340 | 8.4E-04 | 0.00337543 | Mcm6     |
| ENSMUSG00000025532 | 3084.876   | 0.273 | 0.068 | 4.013 | 6.0E-05 | 0.00029551 | Crep     |
| ENSMUSG00000056201 | 131046.877 | 0.272 | 0.050 | 5.398 | 6.7E-08 | 4.9021E-07 | Cfl1     |
| ENSMUSG00000020640 | 3514.562   | 0.272 | 0.075 | 3.645 | 2.7E-04 | 0.00118291 | Itsn2    |
| ENSMUSG00000068798 | 5121.006   | 0.272 | 0.082 | 3.315 | 9.2E-04 | 0.00365407 | Rap1a    |
| ENSMUSG00000036499 | 4138.440   | 0.271 | 0.092 | 2.951 | 3.2E-03 | 0.01135571 | Eea1     |
| ENSMUSG00000020993 | 3516.215   | 0.271 | 0.068 | 3.976 | 7.0E-05 | 0.00034165 | Trappc6b |
| ENSMUSG00000021494 | 2818.998   | 0.271 | 0.097 | 2.797 | 5.2E-03 | 0.01753511 | Ddx41    |
| ENSMUSG00000032405 | 2346.122   | 0.270 | 0.104 | 2.605 | 9.2E-03 | 0.02903432 | Pias1    |
| ENSMUSG00000032293 | 1111.358   | 0.270 | 0.108 | 2.491 | 1.3E-02 | 0.03869356 | Ireb2    |
| ENSMUSG00000015355 | 9033.711   | 0.269 | 0.068 | 3.972 | 7.1E-05 | 0.00034661 | Cd48     |



|                    |           |       |       |       |         |            |               |
|--------------------|-----------|-------|-------|-------|---------|------------|---------------|
| ENSMUSG00000025485 | 8697.334  | 0.269 | 0.072 | 3.711 | 2.1E-04 | 0.00093118 | Ric8a         |
| ENSMUSG00000067586 | 1732.571  | 0.269 | 0.099 | 2.702 | 6.9E-03 | 0.02260882 | S1pr3         |
| ENSMUSG00000034932 | 4918.621  | 0.268 | 0.093 | 2.890 | 3.9E-03 | 0.01349627 | Mrp154        |
| ENSMUSG00000022536 | 7200.010  | 0.267 | 0.092 | 2.891 | 3.8E-03 | 0.01344751 | Glyr1         |
| ENSMUSG00000039849 | 3273.055  | 0.267 | 0.080 | 3.337 | 8.5E-04 | 0.00340304 | Pcif1         |
| ENSMUSG00000068391 | 2357.690  | 0.267 | 0.076 | 3.503 | 4.6E-04 | 0.0019409  | Chrac1        |
| ENSMUSG00000014956 | 6229.794  | 0.266 | 0.081 | 3.292 | 9.9E-04 | 0.00394419 | Ppp1cb        |
| ENSMUSG00000013465 | 3957.399  | 0.266 | 0.107 | 2.488 | 1.3E-02 | 0.03897301 | Nelfb         |
| ENSMUSG00000038446 | 1740.609  | 0.264 | 0.093 | 2.825 | 4.7E-03 | 0.01624419 | Cdc40         |
| ENSMUSG00000015522 | 2152.470  | 0.262 | 0.109 | 2.396 | 1.7E-02 | 0.04879835 | Arnt          |
| ENSMUSG00000027455 | 3422.706  | 0.261 | 0.066 | 3.926 | 8.6E-05 | 0.00041474 | Nsfl1c        |
| ENSMUSG00000063524 | 46415.813 | 0.261 | 0.063 | 4.156 | 3.2E-05 | 0.00016555 | Eno1          |
| ENSMUSG00000003955 | 3916.992  | 0.261 | 0.107 | 2.427 | 1.5E-02 | 0.04534314 | Fam162a       |
| ENSMUSG00000091896 | 3769.845  | 0.259 | 0.080 | 3.253 | 1.1E-03 | 0.0044877  | Ube2d2a       |
| ENSMUSG00000063281 | 1194.008  | 0.259 | 0.108 | 2.398 | 1.6E-02 | 0.04856211 | Zfp35         |
| ENSMUSG00000030805 | 2462.142  | 0.259 | 0.108 | 2.386 | 1.7E-02 | 0.04989255 | Stx4a         |
| ENSMUSG00000071172 | 5809.848  | 0.257 | 0.065 | 3.939 | 8.2E-05 | 0.00039415 | Srsf3         |
| ENSMUSG00000022892 | 18183.609 | 0.256 | 0.087 | 2.938 | 3.3E-03 | 0.01176596 | App           |
| ENSMUSG00000032309 | 2458.041  | 0.256 | 0.094 | 2.735 | 6.2E-03 | 0.02073841 | Fbxo22        |
| ENSMUSG00000025027 | 5670.245  | 0.256 | 0.095 | 2.697 | 7.0E-03 | 0.02291367 | Xpnp1         |
| ENSMUSG00000060216 | 9721.497  | 0.255 | 0.099 | 2.583 | 9.8E-03 | 0.03064623 | Arrb2         |
| ENSMUSG00000022552 | 3650.060  | 0.254 | 0.079 | 3.218 | 1.3E-03 | 0.00501891 | Sharpin       |
| ENSMUSG00000056708 | 6333.419  | 0.253 | 0.092 | 2.766 | 5.7E-03 | 0.01906642 | Ier5          |
| ENSMUSG00000005683 | 11540.330 | 0.253 | 0.078 | 3.240 | 1.2E-03 | 0.00467351 | Cs            |
| ENSMUSG00000040028 | 12513.358 | 0.252 | 0.069 | 3.654 | 2.6E-04 | 0.00114588 | Elavl1        |
| ENSMUSG00000043939 | 4947.143  | 0.249 | 0.103 | 2.410 | 1.6E-02 | 0.0471675  | A530064D06Rik |
| ENSMUSG00000041846 | 2608.106  | 0.249 | 0.104 | 2.387 | 1.7E-02 | 0.04974489 | Ppp4r3a       |
| ENSMUSG00000038366 | 13732.447 | 0.249 | 0.079 | 3.135 | 1.7E-03 | 0.00650822 | Lasp1         |
| ENSMUSG00000012422 | 5526.092  | 0.249 | 0.091 | 2.734 | 6.3E-03 | 0.0207718  | Tmem167       |
| ENSMUSG00000029440 | 2295.180  | 0.248 | 0.103 | 2.402 | 1.6E-02 | 0.04810432 | Psmc9         |
| ENSMUSG00000024797 | 2727.095  | 0.248 | 0.098 | 2.533 | 1.1E-02 | 0.03490584 | Vps51         |
| ENSMUSG00000003039 | 4898.430  | 0.248 | 0.094 | 2.644 | 8.2E-03 | 0.02627186 | Fam32a        |
| ENSMUSG00000022314 | 2615.424  | 0.247 | 0.102 | 2.416 | 1.6E-02 | 0.04645383 | Rad21         |
| ENSMUSG00000038909 | 2338.763  | 0.247 | 0.099 | 2.480 | 1.3E-02 | 0.03976978 | Kat7          |
| ENSMUSG00000043091 | 16269.018 | 0.247 | 0.081 | 3.056 | 2.2E-03 | 0.00830273 | Tuba1c        |
| ENSMUSG00000026728 | 59669.407 | 0.245 | 0.082 | 2.984 | 2.8E-03 | 0.01029304 | Vim           |
| ENSMUSG00000021737 | 9255.780  | 0.245 | 0.065 | 3.762 | 1.7E-04 | 0.00077226 | Psmc6         |
| ENSMUSG00000021241 | 3462.443  | 0.245 | 0.075 | 3.266 | 1.1E-03 | 0.00429263 | Isca2         |
| ENSMUSG00000026727 | 8762.759  | 0.245 | 0.070 | 3.508 | 4.5E-04 | 0.00190508 | Rsu1          |
| ENSMUSG00000026926 | 4556.785  | 0.244 | 0.093 | 2.612 | 9.0E-03 | 0.02852712 | Pmpca         |
| ENSMUSG00000018567 | 30950.609 | 0.243 | 0.071 | 3.421 | 6.2E-04 | 0.00257032 | Gabarap       |
| ENSMUSG00000030704 | 5989.994  | 0.243 | 0.074 | 3.262 | 1.1E-03 | 0.00436069 | Rab6a         |
| ENSMUSG00000057375 | 4689.146  | 0.242 | 0.089 | 2.708 | 6.8E-03 | 0.02226619 | Yipf1         |
| ENSMUSG00000040396 | 1641.361  | 0.240 | 0.100 | 2.412 | 1.6E-02 | 0.04695235 | Abhd13        |
| ENSMUSG00000070436 | 26023.157 | 0.238 | 0.093 | 2.553 | 1.1E-02 | 0.03311796 | Serpinh1      |
| ENSMUSG00000000290 | 39936.035 | 0.237 | 0.069 | 3.423 | 6.2E-04 | 0.00255353 | Itgb2         |
| ENSMUSG00000021037 | 8450.126  | 0.237 | 0.084 | 2.806 | 5.0E-03 | 0.0171494  | Ahsa1         |
| ENSMUSG00000075376 | 1636.269  | 0.236 | 0.090 | 2.617 | 8.9E-03 | 0.02818368 | Rc3h2         |
| ENSMUSG00000044715 | 2758.776  | 0.236 | 0.094 | 2.500 | 1.2E-02 | 0.03787697 | Gskip         |
| ENSMUSG00000026869 | 5608.838  | 0.235 | 0.093 | 2.533 | 1.1E-02 | 0.03486797 | Psmc5         |
| ENSMUSG00000016308 | 5986.306  | 0.234 | 0.057 | 4.095 | 4.2E-05 | 0.00021301 | Ube2a         |
| ENSMUSG00000026927 | 2815.741  | 0.233 | 0.071 | 3.292 | 9.9E-04 | 0.00394381 | Entr1         |

|                    |           |       |       |       |         |            |               |
|--------------------|-----------|-------|-------|-------|---------|------------|---------------|
| ENSMUSG00000015149 | 8965.609  | 0.233 | 0.069 | 3.393 | 6.9E-04 | 0.00282393 | Sirt2         |
| ENSMUSG00000070697 | 3927.828  | 0.233 | 0.096 | 2.414 | 1.6E-02 | 0.04669268 | Utp3          |
| ENSMUSG00000004937 | 9167.762  | 0.233 | 0.075 | 3.082 | 2.1E-03 | 0.00766006 | Sgta          |
| ENSMUSG00000035227 | 15694.843 | 0.232 | 0.074 | 3.126 | 1.8E-03 | 0.00668918 | Spes2         |
| ENSMUSG00000055681 | 12264.234 | 0.232 | 0.050 | 4.608 | 4.1E-06 | 2.3832E-05 | Cope          |
| ENSMUSG00000020515 | 4077.641  | 0.232 | 0.091 | 2.559 | 1.1E-02 | 0.03266163 | Cnot8         |
| ENSMUSG00000019877 | 9401.535  | 0.231 | 0.088 | 2.612 | 9.0E-03 | 0.02849004 | Serinc1       |
| ENSMUSG00000021576 | 5667.679  | 0.230 | 0.092 | 2.502 | 1.2E-02 | 0.03767242 | Pdcd6         |
| ENSMUSG00000047407 | 6741.682  | 0.228 | 0.078 | 2.943 | 3.3E-03 | 0.01161546 | Tgif1         |
| ENSMUSG00000025289 | 4816.975  | 0.228 | 0.075 | 3.041 | 2.4E-03 | 0.00866995 | Prdx4         |
| ENSMUSG00000020133 | 6739.932  | 0.228 | 0.078 | 2.913 | 3.6E-03 | 0.01262186 | 2310011J03Rik |
| ENSMUSG00000015461 | 6379.531  | 0.227 | 0.090 | 2.508 | 1.2E-02 | 0.03716529 | Atf6b         |
| ENSMUSG00000050017 | 3504.550  | 0.226 | 0.089 | 2.542 | 1.1E-02 | 0.03409225 | Pitpnb        |
| ENSMUSG00000059040 | 2297.627  | 0.225 | 0.091 | 2.489 | 1.3E-02 | 0.03894928 | Eno1b         |
| ENSMUSG00000030738 | 9626.367  | 0.225 | 0.056 | 4.007 | 6.2E-05 | 0.0003033  | Eif3c         |
| ENSMUSG00000029622 | 80574.579 | 0.225 | 0.058 | 3.879 | 1.0E-04 | 0.00049595 | Arpc1b        |
| ENSMUSG00000026480 | 7255.656  | 0.225 | 0.060 | 3.744 | 1.8E-04 | 0.00082414 | Ncf2          |
| ENSMUSG00000027184 | 11300.365 | 0.225 | 0.085 | 2.639 | 8.3E-03 | 0.02663156 | Caprin1       |
| ENSMUSG00000027091 | 4312.512  | 0.224 | 0.080 | 2.783 | 5.4E-03 | 0.01824991 | Zc3h15        |
| ENSMUSG00000038991 | 8913.461  | 0.221 | 0.087 | 2.538 | 1.1E-02 | 0.03445467 | Txndc5        |
| ENSMUSG00000022205 | 10411.555 | 0.219 | 0.082 | 2.677 | 7.4E-03 | 0.02412327 | Sub1          |
| ENSMUSG00000025809 | 22830.487 | 0.219 | 0.078 | 2.791 | 5.3E-03 | 0.01784181 | Itgb1         |
| ENSMUSG00000041560 | 7267.583  | 0.219 | 0.079 | 2.770 | 5.6E-03 | 0.01886942 | Nop53         |
| ENSMUSG00000025130 | 51385.138 | 0.217 | 0.055 | 3.945 | 8.0E-05 | 0.00038416 | P4hb          |
| ENSMUSG00000020166 | 2640.418  | 0.216 | 0.088 | 2.455 | 1.4E-02 | 0.04228467 | Cnot2         |
| ENSMUSG00000022125 | 8853.572  | 0.216 | 0.083 | 2.611 | 9.0E-03 | 0.02858839 | Cln5          |
| ENSMUSG00000026753 | 5556.993  | 0.215 | 0.077 | 2.795 | 5.2E-03 | 0.01766712 | Ppp6c         |
| ENSMUSG00000000563 | 11268.172 | 0.213 | 0.064 | 3.325 | 8.8E-04 | 0.00353972 | Atp5pb        |
| ENSMUSG00000052214 | 2760.366  | 0.213 | 0.073 | 2.914 | 3.6E-03 | 0.01258728 | Opa3          |
| ENSMUSG00000036427 | 31122.504 | 0.212 | 0.065 | 3.255 | 1.1E-03 | 0.00445659 | Gpi1          |
| ENSMUSG00000026426 | 13401.455 | 0.211 | 0.081 | 2.606 | 9.2E-03 | 0.02895777 | Arl8a         |
| ENSMUSG00000040731 | 18733.222 | 0.211 | 0.069 | 3.058 | 2.2E-03 | 0.00825911 | Eif4h         |
| ENSMUSG00000035953 | 8949.441  | 0.210 | 0.081 | 2.593 | 9.5E-03 | 0.02991523 | Pip4p1        |
| ENSMUSG00000027620 | 17856.343 | 0.209 | 0.071 | 2.938 | 3.3E-03 | 0.0117712  | Rbm39         |
| ENSMUSG00000037361 | 4659.575  | 0.208 | 0.072 | 2.878 | 4.0E-03 | 0.01395635 | Sf3b6         |
| ENSMUSG00000036299 | 6449.866  | 0.208 | 0.079 | 2.638 | 8.3E-03 | 0.02668431 | BC031181      |
| ENSMUSG00000001445 | 1997.457  | 0.207 | 0.076 | 2.723 | 6.5E-03 | 0.0214341  | Mrp110        |
| ENSMUSG00000010110 | 4082.365  | 0.205 | 0.082 | 2.502 | 1.2E-02 | 0.03767242 | Stx5a         |
| ENSMUSG00000031622 | 9027.953  | 0.205 | 0.081 | 2.527 | 1.2E-02 | 0.03545702 | Sin3b         |
| ENSMUSG00000033335 | 18989.167 | 0.202 | 0.078 | 2.572 | 1.0E-02 | 0.03154332 | Dnm2          |
| ENSMUSG00000020612 | 27327.603 | 0.201 | 0.069 | 2.918 | 3.5E-03 | 0.01246052 | Prkar1a       |
| ENSMUSG00000025393 | 49420.313 | 0.195 | 0.045 | 4.317 | 1.6E-05 | 8.4996E-05 | Atp5b         |
| ENSMUSG00000052253 | 3327.931  | 0.195 | 0.073 | 2.659 | 7.8E-03 | 0.0252987  | Zfp622        |
| ENSMUSG00000028057 | 4455.088  | 0.194 | 0.081 | 2.398 | 1.6E-02 | 0.04857485 | Rit1          |
| ENSMUSG00000014769 | 13902.304 | 0.194 | 0.061 | 3.167 | 1.5E-03 | 0.00590156 | Psmb1         |
| ENSMUSG00000022283 | 20011.125 | 0.193 | 0.065 | 2.954 | 3.1E-03 | 0.01125275 | Pabpc1        |
| ENSMUSG00000009079 | 15842.193 | 0.189 | 0.065 | 2.915 | 3.6E-03 | 0.01256944 | Ewsr1         |
| ENSMUSG00000024594 | 4432.143  | 0.189 | 0.076 | 2.472 | 1.3E-02 | 0.0405999  | Prrc1         |
| ENSMUSG00000062825 | 63067.726 | 0.189 | 0.055 | 3.428 | 6.1E-04 | 0.00250926 | Actg1         |
| ENSMUSG00000073639 | 6381.182  | 0.187 | 0.064 | 2.919 | 3.5E-03 | 0.01243715 | Rab18         |
| ENSMUSG00000028757 | 18253.345 | 0.187 | 0.060 | 3.118 | 1.8E-03 | 0.00686219 | Ddost         |
| ENSMUSG00000059208 | 5924.540  | 0.184 | 0.072 | 2.561 | 1.0E-02 | 0.03243814 | Hnrnpm        |

|                    |           |        |       |        |         |            |               |
|--------------------|-----------|--------|-------|--------|---------|------------|---------------|
| ENSMUSG00000025858 | 4142.067  | 0.182  | 0.073 | 2.473  | 1.3E-02 | 0.04044163 | Get4          |
| ENSMUSG00000027248 | 31390.898 | 0.181  | 0.072 | 2.510  | 1.2E-02 | 0.03693812 | Pdia3         |
| ENSMUSG00000025428 | 34487.417 | 0.178  | 0.057 | 3.129  | 1.8E-03 | 0.00663889 | Atp5a1        |
| ENSMUSG00000028277 | 7042.324  | 0.173  | 0.055 | 3.152  | 1.6E-03 | 0.00617488 | Ube2j1        |
| ENSMUSG00000021178 | 15397.799 | 0.170  | 0.065 | 2.604  | 9.2E-03 | 0.02912215 | Psmc1         |
| ENSMUSG00000020708 | 9812.099  | 0.165  | 0.062 | 2.665  | 7.7E-03 | 0.02486865 | Psmc5         |
| ENSMUSG00000024767 | 9655.757  | 0.164  | 0.065 | 2.534  | 1.1E-02 | 0.03479264 | Otub1         |
| ENSMUSG00000021546 | 23404.343 | 0.162  | 0.066 | 2.458  | 1.4E-02 | 0.04197215 | Hnrnpk        |
| ENSMUSG00000079426 | 19750.594 | 0.161  | 0.046 | 3.465  | 5.3E-04 | 0.00221405 | Arpc4         |
| ENSMUSG00000057236 | 10203.003 | 0.158  | 0.057 | 2.790  | 5.3E-03 | 0.01787264 | Rbbp4         |
| ENSMUSG00000024097 | 9543.346  | 0.154  | 0.059 | 2.593  | 9.5E-03 | 0.02991523 | Srsf7         |
| ENSMUSG00000047187 | 15170.626 | 0.150  | 0.060 | 2.516  | 1.2E-02 | 0.03642666 | Rab2a         |
| ENSMUSG00000024725 | 29611.960 | 0.143  | 0.053 | 2.687  | 7.2E-03 | 0.02348745 | Ostf1         |
| ENSMUSG00000019179 | 23062.397 | -0.169 | 0.043 | -3.960 | 7.5E-05 | 0.00036311 | Mdh2          |
| ENSMUSG00000030663 | 7427.632  | -0.179 | 0.069 | -2.612 | 9.0E-03 | 0.02852868 | 1110004F10Rik |
| ENSMUSG00000061032 | 9725.770  | -0.180 | 0.074 | -2.445 | 1.4E-02 | 0.04330484 | Rrp1          |
| ENSMUSG00000004849 | 9326.491  | -0.183 | 0.064 | -2.839 | 4.5E-03 | 0.0156118  | Ap1s1         |
| ENSMUSG00000025940 | 3029.782  | -0.184 | 0.077 | -2.387 | 1.7E-02 | 0.04978237 | Tmem70        |
| ENSMUSG00000029458 | 3200.629  | -0.185 | 0.072 | -2.579 | 9.9E-03 | 0.03101243 | Brap          |
| ENSMUSG00000044221 | 3236.119  | -0.189 | 0.077 | -2.470 | 1.4E-02 | 0.04074069 | Grsf1         |
| ENSMUSG00000019579 | 6165.724  | -0.190 | 0.072 | -2.648 | 8.1E-03 | 0.02602967 | Mydgf         |
| ENSMUSG00000045983 | 10821.838 | -0.190 | 0.068 | -2.791 | 5.3E-03 | 0.01783911 | Eif4g1        |
| ENSMUSG00000027170 | 5106.101  | -0.190 | 0.078 | -2.428 | 1.5E-02 | 0.0451606  | Eif3m         |
| ENSMUSG00000002014 | 7267.426  | -0.192 | 0.079 | -2.421 | 1.5E-02 | 0.04592155 | Ssr4          |
| ENSMUSG00000039886 | 6955.896  | -0.194 | 0.075 | -2.603 | 9.2E-03 | 0.02914386 | Tmem120a      |
| ENSMUSG00000006273 | 34824.393 | -0.197 | 0.079 | -2.480 | 1.3E-02 | 0.03977731 | Atp6v1b2      |
| ENSMUSG00000035325 | 11787.766 | -0.198 | 0.073 | -2.726 | 6.4E-03 | 0.02126416 | Sec31a        |
| ENSMUSG00000020074 | 4921.885  | -0.199 | 0.083 | -2.405 | 1.6E-02 | 0.04777981 | Ccar1         |
| ENSMUSG00000020376 | 11639.486 | -0.200 | 0.067 | -2.972 | 3.0E-03 | 0.01066978 | Rnfl30        |
| ENSMUSG00000037933 | 3287.598  | -0.200 | 0.077 | -2.607 | 9.1E-03 | 0.02887854 | Bicd2         |
| ENSMUSG00000021326 | 4986.791  | -0.202 | 0.076 | -2.650 | 8.0E-03 | 0.02589309 | Trim27        |
| ENSMUSG00000079111 | 8939.578  | -0.203 | 0.075 | -2.699 | 7.0E-03 | 0.02279499 | Kdelr2        |
| ENSMUSG00000039168 | 8225.068  | -0.203 | 0.077 | -2.633 | 8.5E-03 | 0.02708084 | Dap           |
| ENSMUSG00000026032 | 2370.591  | -0.204 | 0.078 | -2.616 | 8.9E-03 | 0.0282758  | Ndufb3        |
| ENSMUSG00000009687 | 27660.969 | -0.209 | 0.083 | -2.519 | 1.2E-02 | 0.03616598 | Fxyd5         |
| ENSMUSG00000052456 | 4145.439  | -0.211 | 0.071 | -2.967 | 3.0E-03 | 0.01082746 | Get3          |
| ENSMUSG00000020458 | 18560.401 | -0.211 | 0.083 | -2.563 | 1.0E-02 | 0.03230829 | Rtn4          |
| ENSMUSG00000038650 | 24155.806 | -0.215 | 0.085 | -2.513 | 1.2E-02 | 0.03668926 | Rnh1          |
| ENSMUSG00000025156 | 2876.979  | -0.218 | 0.087 | -2.512 | 1.2E-02 | 0.0368103  | Gps1          |
| ENSMUSG00000028156 | 4885.940  | -0.220 | 0.078 | -2.819 | 4.8E-03 | 0.01650219 | Eif4e         |
| ENSMUSG00000031954 | 3144.925  | -0.220 | 0.086 | -2.569 | 1.0E-02 | 0.03178787 | Cfdp1         |
| ENSMUSG00000026260 | 4829.388  | -0.221 | 0.061 | -3.607 | 3.1E-04 | 0.00135189 | Ndufa10       |
| ENSMUSG00000032353 | 6154.628  | -0.222 | 0.086 | -2.584 | 9.8E-03 | 0.03057276 | Tmed3         |
| ENSMUSG00000003072 | 13068.449 | -0.222 | 0.066 | -3.345 | 8.2E-04 | 0.00331885 | Atp5d         |
| ENSMUSG00000030357 | 5186.323  | -0.226 | 0.081 | -2.776 | 5.5E-03 | 0.01860216 | Fkbp4         |
| ENSMUSG00000024914 | 4139.964  | -0.227 | 0.082 | -2.766 | 5.7E-03 | 0.01906642 | Drap1         |
| ENSMUSG00000022553 | 6483.664  | -0.227 | 0.068 | -3.331 | 8.6E-04 | 0.00346577 | Maf1          |
| ENSMUSG00000027304 | 1874.167  | -0.227 | 0.094 | -2.409 | 1.6E-02 | 0.04729449 | Rtf1          |
| ENSMUSG00000022452 | 6698.044  | -0.235 | 0.082 | -2.853 | 4.3E-03 | 0.01499063 | Smdt1         |
| ENSMUSG00000022706 | 2841.585  | -0.235 | 0.099 | -2.390 | 1.7E-02 | 0.04944916 | Mrpl40        |
| ENSMUSG00000035772 | 1647.967  | -0.237 | 0.085 | -2.802 | 5.1E-03 | 0.01733276 | Mrps2         |
| ENSMUSG00000038510 | 1653.799  | -0.238 | 0.091 | -2.613 | 9.0E-03 | 0.02846748 | Rpf2          |

|                    |           |        |       |        |         |            |               |
|--------------------|-----------|--------|-------|--------|---------|------------|---------------|
| ENSMUSG00000010376 | 8226.281  | -0.238 | 0.085 | -2.786 | 5.3E-03 | 0.0180796  | Nedd8         |
| ENSMUSG00000031696 | 12126.935 | -0.239 | 0.095 | -2.522 | 1.2E-02 | 0.03583664 | Vps35         |
| ENSMUSG00000030870 | 5141.937  | -0.239 | 0.081 | -2.954 | 3.1E-03 | 0.01124407 | Ubfd1         |
| ENSMUSG00000024614 | 2975.842  | -0.242 | 0.098 | -2.463 | 1.4E-02 | 0.04149019 | Tmx3          |
| ENSMUSG00000006024 | 14592.834 | -0.242 | 0.066 | -3.647 | 2.7E-04 | 0.00117347 | Napa          |
| ENSMUSG00000029432 | 2934.421  | -0.244 | 0.102 | -2.387 | 1.7E-02 | 0.04980173 | Nipsnap2      |
| ENSMUSG00000056888 | 5256.894  | -0.244 | 0.082 | -2.984 | 2.8E-03 | 0.01030974 | Glipr1        |
| ENSMUSG00000002635 | 1941.981  | -0.245 | 0.098 | -2.493 | 1.3E-02 | 0.03853484 | Pdcd21        |
| ENSMUSG00000028478 | 23321.625 | -0.245 | 0.055 | -4.485 | 7.3E-06 | 4.1201E-05 | Clta          |
| ENSMUSG00000007721 | 5351.508  | -0.245 | 0.076 | -3.209 | 1.3E-03 | 0.00515508 | Ccdc124       |
| ENSMUSG00000058076 | 4376.697  | -0.245 | 0.076 | -3.207 | 1.3E-03 | 0.00518858 | Sdhc          |
| ENSMUSG00000026305 | 9259.946  | -0.245 | 0.070 | -3.522 | 4.3E-04 | 0.00181732 | Lrrfip1       |
| ENSMUSG00000053253 | 4559.228  | -0.245 | 0.082 | -2.978 | 2.9E-03 | 0.01049275 | Ndfip2        |
| ENSMUSG00000037058 | 6254.697  | -0.247 | 0.073 | -3.388 | 7.0E-04 | 0.00286902 | Paip2         |
| ENSMUSG00000022247 | 3042.025  | -0.247 | 0.083 | -2.963 | 3.0E-03 | 0.01093734 | Brix1         |
| ENSMUSG00000030059 | 6304.909  | -0.247 | 0.085 | -2.922 | 3.5E-03 | 0.01232561 | Tmf1          |
| ENSMUSG00000028788 | 15342.734 | -0.248 | 0.089 | -2.775 | 5.5E-03 | 0.01863382 | Ptp4a2        |
| ENSMUSG00000032480 | 3374.808  | -0.248 | 0.104 | -2.392 | 1.7E-02 | 0.04917533 | Dhx30         |
| ENSMUSG00000020432 | 11353.768 | -0.249 | 0.101 | -2.457 | 1.4E-02 | 0.04210012 | Tcn2          |
| ENSMUSG00000075229 | 1050.927  | -0.250 | 0.095 | -2.629 | 8.6E-03 | 0.02736933 | Ccdc58        |
| ENSMUSG00000070544 | 7864.463  | -0.250 | 0.078 | -3.211 | 1.3E-03 | 0.00513189 | Top1          |
| ENSMUSG00000029599 | 4269.482  | -0.251 | 0.082 | -3.046 | 2.3E-03 | 0.00854361 | Ddx54         |
| ENSMUSG00000036104 | 1926.549  | -0.251 | 0.100 | -2.511 | 1.2E-02 | 0.03683849 | Rab3gap1      |
| ENSMUSG00000004394 | 3498.247  | -0.252 | 0.083 | -3.043 | 2.3E-03 | 0.00864209 | Tmed4         |
| ENSMUSG00000017188 | 6354.227  | -0.253 | 0.083 | -3.058 | 2.2E-03 | 0.00824444 | Coa3          |
| ENSMUSG00000018189 | 3025.874  | -0.253 | 0.103 | -2.453 | 1.4E-02 | 0.04245883 | Uchl5         |
| ENSMUSG00000028136 | 4388.218  | -0.253 | 0.093 | -2.721 | 6.5E-03 | 0.02153291 | Snx27         |
| ENSMUSG00000020477 | 4477.223  | -0.254 | 0.094 | -2.695 | 7.0E-03 | 0.02300858 | Mrps24        |
| ENSMUSG00000025854 | 31368.905 | -0.255 | 0.101 | -2.528 | 1.1E-02 | 0.03531206 | Fam20c        |
| ENSMUSG00000004677 | 4203.809  | -0.255 | 0.097 | -2.636 | 8.4E-03 | 0.02689045 | Myo9b         |
| ENSMUSG00000020358 | 10367.675 | -0.256 | 0.068 | -3.763 | 1.7E-04 | 0.00076878 | Hnrnpab       |
| ENSMUSG00000031711 | 1722.683  | -0.256 | 0.095 | -2.686 | 7.2E-03 | 0.02357922 | Zfp330        |
| ENSMUSG00000001211 | 4270.403  | -0.256 | 0.104 | -2.461 | 1.4E-02 | 0.04172006 | Agpat3        |
| ENSMUSG00000021610 | 8174.945  | -0.257 | 0.076 | -3.391 | 7.0E-04 | 0.00283629 | Clptm11       |
| ENSMUSG00000047613 | 2331.877  | -0.258 | 0.097 | -2.665 | 7.7E-03 | 0.02487726 | A430005L14Rik |
| ENSMUSG00000008763 | 2644.473  | -0.259 | 0.102 | -2.542 | 1.1E-02 | 0.03411647 | Man1a2        |
| ENSMUSG00000025968 | 2322.262  | -0.260 | 0.093 | -2.805 | 5.0E-03 | 0.0172085  | Ndufs1        |
| ENSMUSG00000029484 | 13319.224 | -0.260 | 0.085 | -3.052 | 2.3E-03 | 0.00839362 | Anxa3         |
| ENSMUSG00000118346 | 4248.106  | -0.260 | 0.092 | -2.833 | 4.6E-03 | 0.01586129 | Tmem179b      |
| ENSMUSG00000038416 | 3088.045  | -0.260 | 0.097 | -2.673 | 7.5E-03 | 0.02435893 | Cdc16         |
| ENSMUSG00000003813 | 3100.779  | -0.260 | 0.099 | -2.623 | 8.7E-03 | 0.02776607 | Rad23a        |
| ENSMUSG00000015971 | 2038.344  | -0.263 | 0.103 | -2.563 | 1.0E-02 | 0.03230829 | Actr8         |
| ENSMUSG00000038141 | 1148.245  | -0.263 | 0.103 | -2.564 | 1.0E-02 | 0.03218659 | Tmem181a      |
| ENSMUSG00000036023 | 2433.868  | -0.263 | 0.106 | -2.472 | 1.3E-02 | 0.04057793 | Parp2         |
| ENSMUSG00000028070 | 4263.064  | -0.263 | 0.073 | -3.605 | 3.1E-04 | 0.00135954 | Naxe          |
| ENSMUSG00000040613 | 17543.624 | -0.263 | 0.106 | -2.492 | 1.3E-02 | 0.03865789 | Apobec1       |
| ENSMUSG00000028559 | 5755.416  | -0.264 | 0.105 | -2.521 | 1.2E-02 | 0.03596968 | Osbp19        |
| ENSMUSG00000034928 | 7040.350  | -0.264 | 0.094 | -2.811 | 4.9E-03 | 0.01690661 | Rnf44         |
| ENSMUSG00000048440 | 1234.135  | -0.265 | 0.106 | -2.488 | 1.3E-02 | 0.03901425 | Cyp4fl6       |
| ENSMUSG00000034189 | 5220.091  | -0.266 | 0.083 | -3.209 | 1.3E-03 | 0.00515508 | Hsd11         |
| ENSMUSG00000019494 | 6713.744  | -0.267 | 0.067 | -3.998 | 6.4E-05 | 0.00031352 | Cops6         |
| ENSMUSG00000000827 | 4325.024  | -0.267 | 0.066 | -4.049 | 5.2E-05 | 0.00025679 | Tpd5212       |

|                     |            |        |       |        |         |            |               |
|---------------------|------------|--------|-------|--------|---------|------------|---------------|
| ENSMUSG0000006299   | 7716.432   | -0.268 | 0.061 | -4.378 | 1.2E-05 | 6.5632E-05 | Aamp          |
| ENSMUSG00000018921  | 1378.672   | -0.269 | 0.110 | -2.438 | 1.5E-02 | 0.0440442  | Pelp1         |
| ENSMUSG00000026434  | 3567.471   | -0.269 | 0.080 | -3.381 | 7.2E-04 | 0.0029409  | Nucks1        |
| ENSMUSG00000063235  | 1375.500   | -0.270 | 0.102 | -2.646 | 8.1E-03 | 0.02615349 | Ptpmt1        |
| ENSMUSG00000070520  | 2298.342   | -0.272 | 0.091 | -2.985 | 2.8E-03 | 0.0102798  | Nsmce3        |
| ENSMUSG00000033845  | 2928.772   | -0.272 | 0.089 | -3.070 | 2.1E-03 | 0.00796799 | Mrpl15        |
| ENSMUSG00000061559  | 4215.465   | -0.273 | 0.084 | -3.243 | 1.2E-03 | 0.00463038 | Wdr61         |
| ENSMUSG00000024902  | 1544.550   | -0.274 | 0.110 | -2.490 | 1.3E-02 | 0.03884137 | Mrpl11        |
| ENSMUSG00000028676  | 3238.145   | -0.274 | 0.085 | -3.241 | 1.2E-03 | 0.00465827 | Srsf10        |
| ENSMUSG00000027282  | 8452.900   | -0.274 | 0.075 | -3.649 | 2.6E-04 | 0.00116421 | Mtch2         |
| ENSMUSG00000036371  | 10939.896  | -0.274 | 0.072 | -3.794 | 1.5E-04 | 0.00068658 | Serbp1        |
| ENSMUSG00000005378  | 3395.060   | -0.275 | 0.082 | -3.357 | 7.9E-04 | 0.00318888 | Bud23         |
| ENSMUSG00000057113  | 13677.163  | -0.276 | 0.068 | -4.057 | 5.0E-05 | 0.00024879 | Npm1          |
| ENSMUSG000000118664 | 2312.323   | -0.276 | 0.110 | -2.515 | 1.2E-02 | 0.03648665 | AC168314.1    |
| ENSMUSG00000002395  | 4259.293   | -0.277 | 0.089 | -3.092 | 2.0E-03 | 0.00744596 | Use1          |
| ENSMUSG00000008301  | 2120.710   | -0.277 | 0.103 | -2.684 | 7.3E-03 | 0.02367665 | Phax          |
| ENSMUSG00000038095  | 4939.950   | -0.277 | 0.101 | -2.743 | 6.1E-03 | 0.02028826 | Sbno1         |
| ENSMUSG00000031516  | 1885.164   | -0.279 | 0.095 | -2.937 | 3.3E-03 | 0.01181291 | Dctn6         |
| ENSMUSG00000015749  | 2657.801   | -0.279 | 0.098 | -2.858 | 4.3E-03 | 0.01478257 | Anp32e        |
| ENSMUSG00000006390  | 11513.105  | -0.279 | 0.075 | -3.732 | 1.9E-04 | 0.00086218 | Elov11        |
| ENSMUSG00000049932  | 6404.898   | -0.279 | 0.114 | -2.454 | 1.4E-02 | 0.04243401 | H2ax          |
| ENSMUSG00000055302  | 13252.401  | -0.280 | 0.063 | -4.465 | 8.0E-06 | 4.5073E-05 | Mrfap1        |
| ENSMUSG00000043716  | 13386.831  | -0.281 | 0.113 | -2.485 | 1.3E-02 | 0.03930451 | Rpl7          |
| ENSMUSG00000027365  | 1992.562   | -0.281 | 0.116 | -2.413 | 1.6E-02 | 0.04679775 | Trpm7         |
| ENSMUSG00000098923  | 3476.767   | -0.281 | 0.082 | -3.437 | 5.9E-04 | 0.00243121 | Tmem185b      |
| ENSMUSG00000034994  | 20616.335  | -0.281 | 0.066 | -4.282 | 1.9E-05 | 9.8423E-05 | Eef2          |
| ENSMUSG00000041075  | 1804.206   | -0.282 | 0.107 | -2.622 | 8.7E-03 | 0.02781467 | Fzd7          |
| ENSMUSG00000023170  | 2452.125   | -0.282 | 0.098 | -2.882 | 3.9E-03 | 0.01378905 | Gps2          |
| ENSMUSG00000063065  | 5723.104   | -0.282 | 0.100 | -2.818 | 4.8E-03 | 0.01657132 | Mapk3         |
| ENSMUSG00000020076  | 1724.581   | -0.282 | 0.097 | -2.916 | 3.5E-03 | 0.01252695 | Ddx50         |
| ENSMUSG00000054408  | 7133.164   | -0.282 | 0.097 | -2.903 | 3.7E-03 | 0.01298849 | Spcs3         |
| ENSMUSG00000021224  | 2569.510   | -0.283 | 0.101 | -2.798 | 5.1E-03 | 0.01753281 | Numb          |
| ENSMUSG00000007029  | 3698.076   | -0.283 | 0.118 | -2.398 | 1.6E-02 | 0.04853831 | Vars          |
| ENSMUSG00000055817  | 1976.316   | -0.283 | 0.114 | -2.478 | 1.3E-02 | 0.0400068  | Mta3          |
| ENSMUSG00000022561  | 3666.393   | -0.283 | 0.081 | -3.490 | 4.8E-04 | 0.00203329 | Gpaa1         |
| ENSMUSG00000079557  | 5241.399   | -0.284 | 0.100 | -2.846 | 4.4E-03 | 0.01530002 | Marchf2       |
| ENSMUSG00000021939  | 907420.237 | -0.284 | 0.091 | -3.126 | 1.8E-03 | 0.00668522 | Ctsb          |
| ENSMUSG00000074886  | 2657.021   | -0.285 | 0.115 | -2.473 | 1.3E-02 | 0.04045415 | Grk6          |
| ENSMUSG00000021550  | 4548.421   | -0.285 | 0.106 | -2.688 | 7.2E-03 | 0.02345567 | 2210016F16Rik |
| ENSMUSG00000061479  | 3718.808   | -0.285 | 0.113 | -2.530 | 1.1E-02 | 0.03518644 | Snrpa         |
| ENSMUSG00000038418  | 7614.179   | -0.285 | 0.102 | -2.796 | 5.2E-03 | 0.01759641 | Egr1          |
| ENSMUSG00000019777  | 3186.150   | -0.285 | 0.080 | -3.587 | 3.3E-04 | 0.00145229 | Hdac2         |
| ENSMUSG00000004455  | 1845.155   | -0.287 | 0.090 | -3.186 | 1.4E-03 | 0.0055537  | Ppp1cc        |
| ENSMUSG00000032437  | 5945.995   | -0.287 | 0.106 | -2.692 | 7.1E-03 | 0.02318192 | Stt3b         |
| ENSMUSG00000078348  | 5476.011   | -0.287 | 0.095 | -3.009 | 2.6E-03 | 0.00954313 | Sf3b5         |
| ENSMUSG00000019837  | 1406.776   | -0.287 | 0.102 | -2.810 | 5.0E-03 | 0.01693066 | Gtf3c6        |
| ENSMUSG00000024483  | 1480.916   | -0.289 | 0.106 | -2.732 | 6.3E-03 | 0.02090499 | Ankhd1        |
| ENSMUSG00000027163  | 1668.456   | -0.289 | 0.117 | -2.475 | 1.3E-02 | 0.0403387  | Commd9        |
| ENSMUSG00000021252  | 1891.237   | -0.290 | 0.095 | -3.048 | 2.3E-03 | 0.00850725 | Erg28         |
| ENSMUSG00000023942  | 5206.953   | -0.290 | 0.110 | -2.650 | 8.1E-03 | 0.02591693 | Slc29a1       |
| ENSMUSG00000063015  | 5599.560   | -0.290 | 0.094 | -3.093 | 2.0E-03 | 0.00741089 | Ccni          |
| ENSMUSG00000023883  | 1190.734   | -0.291 | 0.113 | -2.580 | 9.9E-03 | 0.03092415 | Phf10         |

|                     |           |        |       |        |         |            |          |
|---------------------|-----------|--------|-------|--------|---------|------------|----------|
| ENSMUSG00000034345  | 3546.258  | -0.291 | 0.090 | -3.239 | 1.2E-03 | 0.00468779 | Gtf2h5   |
| ENSMUSG00000024947  | 1749.973  | -0.291 | 0.106 | -2.755 | 5.9E-03 | 0.01961268 | Men1     |
| ENSMUSG00000017778  | 2338.993  | -0.292 | 0.114 | -2.569 | 1.0E-02 | 0.03175799 | Cox7c    |
| ENSMUSG00000086503  | 5116.084  | -0.293 | 0.095 | -3.093 | 2.0E-03 | 0.00740944 | Xist     |
| ENSMUSG00000030934  | 5475.978  | -0.293 | 0.100 | -2.938 | 3.3E-03 | 0.01177125 | Oat      |
| ENSMUSG00000031299  | 2767.874  | -0.293 | 0.106 | -2.774 | 5.5E-03 | 0.0186575  | Pdha1    |
| ENSMUSG00000029684  | 1294.862  | -0.294 | 0.111 | -2.644 | 8.2E-03 | 0.02628404 | Wasl     |
| ENSMUSG00000002320  | 2532.016  | -0.294 | 0.093 | -3.178 | 1.5E-03 | 0.00569467 | Tm9sf1   |
| ENSMUSG00000058099  | 11480.638 | -0.295 | 0.098 | -3.009 | 2.6E-03 | 0.00956498 | Nfam1    |
| ENSMUSG00000007656  | 4382.322  | -0.295 | 0.094 | -3.128 | 1.8E-03 | 0.00665546 | Arpp19   |
| ENSMUSG00000023904  | 2314.182  | -0.296 | 0.102 | -2.895 | 3.8E-03 | 0.0133095  | Hcfc1r1  |
| ENSMUSG00000015243  | 3965.621  | -0.296 | 0.119 | -2.480 | 1.3E-02 | 0.03983018 | Abca1    |
| ENSMUSG00000030965  | 2502.895  | -0.296 | 0.120 | -2.466 | 1.4E-02 | 0.04108799 | Abraxas2 |
| ENSMUSG00000031672  | 2671.375  | -0.297 | 0.099 | -3.003 | 2.7E-03 | 0.00971584 | Got2     |
| ENSMUSG00000049940  | 2338.566  | -0.297 | 0.088 | -3.374 | 7.4E-04 | 0.003008   | Pgrmc2   |
| ENSMUSG00000020402  | 7516.167  | -0.297 | 0.082 | -3.625 | 2.9E-04 | 0.00127022 | Vdac1    |
| ENSMUSG00000040423  | 2259.909  | -0.297 | 0.110 | -2.713 | 6.7E-03 | 0.02203029 | Rc3h1    |
| ENSMUSG00000024099  | 6935.242  | -0.298 | 0.066 | -4.526 | 6.0E-06 | 3.4411E-05 | Ndufv2   |
| ENSMUSG00000002949  | 2492.987  | -0.298 | 0.107 | -2.774 | 5.5E-03 | 0.0186575  | Timm44   |
| ENSMUSG00000009563  | 2692.665  | -0.298 | 0.116 | -2.572 | 1.0E-02 | 0.03153577 | Tor2a    |
| ENSMUSG00000030842  | 14239.687 | -0.298 | 0.088 | -3.384 | 7.1E-04 | 0.00290587 | Lamtor1  |
| ENSMUSG00000029319  | 2059.231  | -0.300 | 0.113 | -2.658 | 7.9E-03 | 0.02533362 | Coq2     |
| ENSMUSG00000059278  | 1008.908  | -0.300 | 0.114 | -2.625 | 8.7E-03 | 0.02759443 | Naa38    |
| ENSMUSG00000032388  | 9924.422  | -0.300 | 0.066 | -4.549 | 5.4E-06 | 3.0989E-05 | Spg21    |
| ENSMUSG00000024870  | 17135.765 | -0.300 | 0.059 | -5.063 | 4.1E-07 | 2.7216E-06 | Rab1b    |
| ENSMUSG00000045624  | 1338.659  | -0.300 | 0.106 | -2.834 | 4.6E-03 | 0.01584592 | Esfl     |
| ENSMUSG00000037376  | 1576.610  | -0.301 | 0.114 | -2.632 | 8.5E-03 | 0.02715948 | Trmt6    |
| ENSMUSG00000046432  | 1457.894  | -0.301 | 0.124 | -2.430 | 1.5E-02 | 0.04496481 | Bex3     |
| ENSMUSG00000029623  | 2569.733  | -0.301 | 0.108 | -2.791 | 5.3E-03 | 0.01785027 | Pdap1    |
| ENSMUSG00000018379  | 6250.192  | -0.301 | 0.088 | -3.445 | 5.7E-04 | 0.00236869 | Srsfl    |
| ENSMUSG00000005981  | 2837.675  | -0.301 | 0.113 | -2.670 | 7.6E-03 | 0.02460229 | Trap1    |
| ENSMUSG00000022407  | 3729.980  | -0.302 | 0.119 | -2.549 | 1.1E-02 | 0.03352957 | Adsl     |
| ENSMUSG00000041958  | 4815.485  | -0.304 | 0.067 | -4.541 | 5.6E-06 | 3.2068E-05 | Pigs     |
| ENSMUSG00000006731  | 3443.661  | -0.305 | 0.093 | -3.279 | 1.0E-03 | 0.00412238 | B4galnt1 |
| ENSMUSG000000110841 | 796.128   | -0.305 | 0.107 | -2.837 | 4.6E-03 | 0.01572176 | Gpx4-ps2 |
| ENSMUSG00000029632  | 8716.342  | -0.305 | 0.110 | -2.764 | 5.7E-03 | 0.01918652 | Ndufa4   |
| ENSMUSG00000005204  | 2070.531  | -0.306 | 0.097 | -3.147 | 1.6E-03 | 0.0062719  | Senp3    |
| ENSMUSG000000061306 | 5618.358  | -0.306 | 0.103 | -2.971 | 3.0E-03 | 0.01069426 | Slc38a10 |
| ENSMUSG00000049299  | 2321.041  | -0.306 | 0.099 | -3.080 | 2.1E-03 | 0.00771246 | Trappc1  |
| ENSMUSG00000018412  | 2344.227  | -0.307 | 0.123 | -2.496 | 1.3E-02 | 0.03822215 | Kansl1   |
| ENSMUSG00000019297  | 2660.044  | -0.307 | 0.114 | -2.686 | 7.2E-03 | 0.02358053 | Nop9     |
| ENSMUSG00000003500  | 2937.755  | -0.308 | 0.115 | -2.675 | 7.5E-03 | 0.02424268 | Impdh1   |
| ENSMUSG00000003099  | 4390.304  | -0.308 | 0.092 | -3.367 | 7.6E-04 | 0.00308301 | Ppp5c    |
| ENSMUSG00000027671  | 2303.892  | -0.311 | 0.103 | -3.008 | 2.6E-03 | 0.00959326 | Actl6a   |
| ENSMUSG00000002031  | 1109.085  | -0.311 | 0.124 | -2.499 | 1.2E-02 | 0.03795165 | Ift46    |
| ENSMUSG00000010609  | 3417.618  | -0.311 | 0.112 | -2.775 | 5.5E-03 | 0.01863537 | Psen2    |
| ENSMUSG00000020537  | 2684.275  | -0.311 | 0.103 | -3.011 | 2.6E-03 | 0.00950813 | Drg2     |
| ENSMUSG00000027011  | 3296.705  | -0.311 | 0.129 | -2.412 | 1.6E-02 | 0.04691001 | Ube2e3   |
| ENSMUSG00000102869  | 2050.194  | -0.312 | 0.126 | -2.473 | 1.3E-02 | 0.04046602 | Norad    |
| ENSMUSG00000048758  | 4634.393  | -0.312 | 0.109 | -2.860 | 4.2E-03 | 0.01471247 | Rpl29    |
| ENSMUSG00000059586  | 2382.158  | -0.313 | 0.089 | -3.531 | 4.1E-04 | 0.00176116 | Nsmce2   |
| ENSMUSG00000028869  | 2559.638  | -0.314 | 0.104 | -3.023 | 2.5E-03 | 0.00916449 | Gnl2     |

|                     |           |        |       |        |         |            |               |
|---------------------|-----------|--------|-------|--------|---------|------------|---------------|
| ENSMUSG00000029426  | 6858.912  | -0.314 | 0.093 | -3.371 | 7.5E-04 | 0.00303438 | Scarb2        |
| ENSMUSG00000036599  | 3972.313  | -0.314 | 0.104 | -3.014 | 2.6E-03 | 0.00941869 | Chst12        |
| ENSMUSG000000081406 | 433.435   | -0.314 | 0.124 | -2.527 | 1.2E-02 | 0.03545559 | Rps6-ps4      |
| ENSMUSG000000029128 | 2107.769  | -0.314 | 0.120 | -2.627 | 8.6E-03 | 0.02745242 | Rab28         |
| ENSMUSG000000031007 | 17280.599 | -0.315 | 0.074 | -4.265 | 2.0E-05 | 0.00010548 | Atp6ap2       |
| ENSMUSG000000022119 | 2218.834  | -0.315 | 0.104 | -3.037 | 2.4E-03 | 0.00879301 | Rbm26         |
| ENSMUSG000000024875 | 4475.038  | -0.315 | 0.097 | -3.239 | 1.2E-03 | 0.00469495 | Yif1a         |
| ENSMUSG000000020238 | 8021.172  | -0.315 | 0.076 | -4.144 | 3.4E-05 | 0.00017346 | Ncln          |
| ENSMUSG000000069020 | 1449.117  | -0.315 | 0.126 | -2.502 | 1.2E-02 | 0.03767242 | Urm1          |
| ENSMUSG000000044148 | 2194.981  | -0.315 | 0.122 | -2.591 | 9.6E-03 | 0.03009561 | 1810030O07Rik |
| ENSMUSG000000028639 | 22357.297 | -0.316 | 0.075 | -4.217 | 2.5E-05 | 0.00012863 | Ybx1          |
| ENSMUSG000000028719 | 10258.537 | -0.316 | 0.091 | -3.468 | 5.3E-04 | 0.00219242 | Cmpk1         |
| ENSMUSG000000026857 | 1531.031  | -0.316 | 0.124 | -2.547 | 1.1E-02 | 0.03363357 | Ntmt1         |
| ENSMUSG000000000355 | 1597.592  | -0.316 | 0.103 | -3.081 | 2.1E-03 | 0.00769073 | Mcts1         |
| ENSMUSG000000022516 | 1503.897  | -0.318 | 0.116 | -2.748 | 6.0E-03 | 0.02002053 | Nudt16l1      |
| ENSMUSG000000023068 | 2718.054  | -0.318 | 0.101 | -3.143 | 1.7E-03 | 0.00634725 | Nus1          |
| ENSMUSG000000054312 | 2473.017  | -0.319 | 0.119 | -2.669 | 7.6E-03 | 0.02461718 | Mrps21        |
| ENSMUSG000000026737 | 2381.032  | -0.319 | 0.115 | -2.769 | 5.6E-03 | 0.01892823 | Pip4k2a       |
| ENSMUSG000000030846 | 1950.406  | -0.320 | 0.108 | -2.958 | 3.1E-03 | 0.01112104 | Tial1         |
| ENSMUSG000000021810 | 2846.159  | -0.320 | 0.130 | -2.454 | 1.4E-02 | 0.04238623 | Ecd           |
| ENSMUSG000000074802 | 2409.661  | -0.320 | 0.113 | -2.841 | 4.5E-03 | 0.01551588 | Gas2l3        |
| ENSMUSG000000026743 | 1295.351  | -0.321 | 0.117 | -2.743 | 6.1E-03 | 0.02028695 | Mllt10        |
| ENSMUSG000000032553 | 3308.301  | -0.321 | 0.119 | -2.696 | 7.0E-03 | 0.0229943  | Srprb         |
| ENSMUSG000000058704 | 3316.879  | -0.321 | 0.096 | -3.350 | 8.1E-04 | 0.003266   | Memol         |
| ENSMUSG000000053565 | 8268.496  | -0.322 | 0.069 | -4.637 | 3.5E-06 | 2.0855E-05 | Eif3k         |
| ENSMUSG000000035242 | 10504.752 | -0.322 | 0.086 | -3.755 | 1.7E-04 | 0.00079255 | Oaz1          |
| ENSMUSG000000047921 | 1680.562  | -0.322 | 0.125 | -2.573 | 1.0E-02 | 0.03142705 | Trappc9       |
| ENSMUSG000000022841 | 15485.081 | -0.323 | 0.083 | -3.889 | 1.0E-04 | 0.00047698 | Ap2m1         |
| ENSMUSG000000031168 | 2524.966  | -0.323 | 0.106 | -3.045 | 2.3E-03 | 0.0085825  | Ebp           |
| ENSMUSG000000021504 | 2038.485  | -0.323 | 0.107 | -3.012 | 2.6E-03 | 0.00948558 | B4galt7       |
| ENSMUSG000000039756 | 3859.090  | -0.323 | 0.091 | -3.563 | 3.7E-04 | 0.00157918 | Dnttip2       |
| ENSMUSG000000033863 | 1174.182  | -0.323 | 0.129 | -2.504 | 1.2E-02 | 0.03753478 | Klf9          |
| ENSMUSG000000000751 | 2417.789  | -0.323 | 0.110 | -2.927 | 3.4E-03 | 0.0121706  | Rpa1          |
| ENSMUSG000000030798 | 4804.877  | -0.325 | 0.085 | -3.807 | 1.4E-04 | 0.00065173 | Cd37          |
| ENSMUSG000000020485 | 2315.611  | -0.325 | 0.123 | -2.651 | 8.0E-03 | 0.02586561 | Supt4a        |
| ENSMUSG000000029250 | 2332.318  | -0.325 | 0.124 | -2.629 | 8.6E-03 | 0.02735285 | Polr2b        |
| ENSMUSG000000029701 | 1733.587  | -0.325 | 0.106 | -3.067 | 2.2E-03 | 0.00802642 | Rbm28         |
| ENSMUSG000000063273 | 2569.108  | -0.325 | 0.117 | -2.779 | 5.4E-03 | 0.01841615 | Naa15         |
| ENSMUSG000000021361 | 9295.477  | -0.326 | 0.064 | -5.100 | 3.4E-07 | 2.2695E-06 | Tmem14c       |
| ENSMUSG000000024493 | 2400.407  | -0.326 | 0.119 | -2.733 | 6.3E-03 | 0.02087019 | Lars          |
| ENSMUSG000000063077 | 4257.108  | -0.326 | 0.133 | -2.446 | 1.4E-02 | 0.04324204 | Kif1b         |
| ENSMUSG000000058050 | 629.416   | -0.326 | 0.120 | -2.707 | 6.8E-03 | 0.02238034 | Gm9234        |
| ENSMUSG000000041236 | 3576.517  | -0.326 | 0.112 | -2.900 | 3.7E-03 | 0.01312921 | Vps41         |
| ENSMUSG000000031885 | 3500.896  | -0.327 | 0.115 | -2.840 | 4.5E-03 | 0.01558513 | Cbfb          |
| ENSMUSG000000025034 | 8210.293  | -0.327 | 0.088 | -3.731 | 1.9E-04 | 0.00086518 | Trim8         |
| ENSMUSG000000040548 | 1748.648  | -0.328 | 0.126 | -2.608 | 9.1E-03 | 0.02878039 | Tex2          |
| ENSMUSG000000031231 | 4287.224  | -0.328 | 0.137 | -2.390 | 1.7E-02 | 0.0494217  | Cox7b         |
| ENSMUSG000000034620 | 2277.231  | -0.329 | 0.096 | -3.429 | 6.0E-04 | 0.00249586 | Rxylt1        |
| ENSMUSG000000021131 | 3471.809  | -0.329 | 0.093 | -3.548 | 3.9E-04 | 0.00166669 | Erh           |
| ENSMUSG000000028672 | 5521.474  | -0.330 | 0.093 | -3.534 | 4.1E-04 | 0.00174733 | Hmgcl         |
| ENSMUSG000000022761 | 1480.855  | -0.331 | 0.110 | -3.009 | 2.6E-03 | 0.00954313 | Lztr1         |
| ENSMUSG000000003166 | 1211.368  | -0.331 | 0.124 | -2.679 | 7.4E-03 | 0.02401488 | Dgcr2         |

|                    |           |        |       |        |         |            |         |
|--------------------|-----------|--------|-------|--------|---------|------------|---------|
| ENSMUSG0000004945  | 2071.232  | -0.332 | 0.120 | -2.762 | 5.8E-03 | 0.01929415 | Tmem242 |
| ENSMUSG00000026966 | 4469.576  | -0.332 | 0.081 | -4.082 | 4.5E-05 | 0.00022407 | Ssna1   |
| ENSMUSG00000041881 | 6602.082  | -0.332 | 0.111 | -2.982 | 2.9E-03 | 0.01034691 | Ndufa7  |
| ENSMUSG00000030045 | 1749.431  | -0.333 | 0.115 | -2.890 | 3.9E-03 | 0.01348602 | Mrpl19  |
| ENSMUSG00000031347 | 1405.040  | -0.333 | 0.104 | -3.211 | 1.3E-03 | 0.00512838 | Cetn2   |
| ENSMUSG00000036860 | 1743.275  | -0.333 | 0.137 | -2.439 | 1.5E-02 | 0.04394612 | Mrpl55  |
| ENSMUSG00000052299 | 1307.094  | -0.334 | 0.114 | -2.923 | 3.5E-03 | 0.01228498 | Ltn1    |
| ENSMUSG00000022174 | 10406.782 | -0.334 | 0.088 | -3.785 | 1.5E-04 | 0.00071019 | Dad1    |
| ENSMUSG00000037280 | 2605.343  | -0.335 | 0.104 | -3.218 | 1.3E-03 | 0.00501889 | Galnt6  |
| ENSMUSG00000022241 | 3996.934  | -0.335 | 0.094 | -3.556 | 3.8E-04 | 0.0016173  | Tars    |
| ENSMUSG00000031848 | 4213.331  | -0.335 | 0.085 | -3.945 | 8.0E-05 | 0.00038507 | Lsm4    |
| ENSMUSG00000005566 | 6183.542  | -0.336 | 0.094 | -3.571 | 3.6E-04 | 0.001533   | Trim28  |
| ENSMUSG00000052738 | 4897.533  | -0.336 | 0.079 | -4.271 | 1.9E-05 | 0.000103   | Suclg1  |
| ENSMUSG00000007836 | 3092.957  | -0.337 | 0.123 | -2.732 | 6.3E-03 | 0.02089857 | Hnrnpa0 |
| ENSMUSG00000026755 | 3047.684  | -0.337 | 0.079 | -4.244 | 2.2E-05 | 0.00011563 | Arpc51  |
| ENSMUSG00000007659 | 15041.670 | -0.338 | 0.098 | -3.462 | 5.4E-04 | 0.00223939 | Bcl211  |
| ENSMUSG00000024286 | 1828.849  | -0.338 | 0.134 | -2.513 | 1.2E-02 | 0.03665999 | Ccny    |
| ENSMUSG00000070056 | 3239.889  | -0.338 | 0.122 | -2.769 | 5.6E-03 | 0.01894215 | Mfhas1  |
| ENSMUSG00000026020 | 2889.820  | -0.338 | 0.121 | -2.784 | 5.4E-03 | 0.01816583 | Nop58   |
| ENSMUSG00000091512 | 4366.108  | -0.338 | 0.078 | -4.320 | 1.6E-05 | 8.3935E-05 | Lamtor3 |
| ENSMUSG00000026427 | 1056.703  | -0.339 | 0.140 | -2.424 | 1.5E-02 | 0.04567296 | Eif2d   |
| ENSMUSG00000034120 | 4791.778  | -0.340 | 0.074 | -4.600 | 4.2E-06 | 2.4616E-05 | Srsf2   |
| ENSMUSG00000063787 | 2634.675  | -0.340 | 0.103 | -3.302 | 9.6E-04 | 0.00381497 | Chchd1  |
| ENSMUSG00000027405 | 3690.006  | -0.340 | 0.100 | -3.413 | 6.4E-04 | 0.00263489 | Nop56   |
| ENSMUSG00000070319 | 8323.003  | -0.340 | 0.077 | -4.416 | 1.0E-05 | 5.5663E-05 | Eif3g   |
| ENSMUSG00000070934 | 5018.193  | -0.341 | 0.105 | -3.243 | 1.2E-03 | 0.00463152 | Rraga   |
| ENSMUSG00000028081 | 7386.656  | -0.341 | 0.091 | -3.735 | 1.9E-04 | 0.00085392 | Rps3a1  |
| ENSMUSG00000055116 | 574.960   | -0.341 | 0.142 | -2.402 | 1.6E-02 | 0.04810432 | Arntl   |
| ENSMUSG00000022437 | 6063.931  | -0.342 | 0.064 | -5.336 | 9.5E-08 | 6.7994E-07 | Samm50  |
| ENSMUSG00000000787 | 2066.660  | -0.342 | 0.101 | -3.378 | 7.3E-04 | 0.00296428 | Ddx3x   |
| ENSMUSG00000031967 | 3417.434  | -0.342 | 0.108 | -3.161 | 1.6E-03 | 0.00600652 | Afg311  |
| ENSMUSG00000032897 | 1231.556  | -0.342 | 0.121 | -2.836 | 4.6E-03 | 0.0157323  | Nfyc    |
| ENSMUSG00000031226 | 3012.819  | -0.342 | 0.089 | -3.865 | 1.1E-04 | 0.00052362 | Pbdc1   |
| ENSMUSG00000037523 | 2476.330  | -0.343 | 0.107 | -3.213 | 1.3E-03 | 0.00508821 | Mavs    |
| ENSMUSG00000024587 | 8917.313  | -0.343 | 0.064 | -5.358 | 8.4E-08 | 6.0747E-07 | Nars    |
| ENSMUSG00000033454 | 1185.278  | -0.343 | 0.129 | -2.666 | 7.7E-03 | 0.02481302 | Zbtb1   |
| ENSMUSG00000022667 | 4089.510  | -0.344 | 0.128 | -2.687 | 7.2E-03 | 0.02348745 | Cd200r1 |
| ENSMUSG00000022337 | 3026.181  | -0.344 | 0.096 | -3.586 | 3.4E-04 | 0.00145804 | Emc2    |
| ENSMUSG00000040112 | 1201.645  | -0.344 | 0.115 | -2.995 | 2.7E-03 | 0.00995956 | Mrps35  |
| ENSMUSG00000027763 | 17315.734 | -0.344 | 0.126 | -2.739 | 6.2E-03 | 0.0204901  | Mbn11   |
| ENSMUSG00000027708 | 1410.715  | -0.345 | 0.115 | -2.995 | 2.7E-03 | 0.00998197 | Dcun1d1 |
| ENSMUSG00000025825 | 4170.029  | -0.345 | 0.068 | -5.070 | 4.0E-07 | 2.6198E-06 | Iscu    |
| ENSMUSG00000053841 | 3093.984  | -0.346 | 0.098 | -3.522 | 4.3E-04 | 0.00182102 | Txlna   |
| ENSMUSG00000025351 | 52242.048 | -0.346 | 0.077 | -4.470 | 7.8E-06 | 4.407E-05  | Cd63    |
| ENSMUSG00000056629 | 4217.419  | -0.346 | 0.105 | -3.304 | 9.5E-04 | 0.003799   | Fkbp2   |
| ENSMUSG00000010911 | 1401.386  | -0.346 | 0.119 | -2.910 | 3.6E-03 | 0.0127343  | Apip    |
| ENSMUSG00000041733 | 1983.710  | -0.346 | 0.098 | -3.542 | 4.0E-04 | 0.00169606 | Coq5    |
| ENSMUSG00000039230 | 1772.771  | -0.347 | 0.111 | -3.122 | 1.8E-03 | 0.00678786 | Tbcd    |
| ENSMUSG00000028464 | 4854.770  | -0.347 | 0.112 | -3.087 | 2.0E-03 | 0.00754914 | Tpm2    |
| ENSMUSG00000020171 | 2089.506  | -0.347 | 0.099 | -3.492 | 4.8E-04 | 0.00201371 | Yeats4  |
| ENSMUSG00000042197 | 1195.440  | -0.347 | 0.142 | -2.440 | 1.5E-02 | 0.04389933 | Zfp451  |
| ENSMUSG00000062929 | 1792.099  | -0.347 | 0.102 | -3.411 | 6.5E-04 | 0.00265601 | Cfl2    |



|                    |           |        |       |        |         |            |               |
|--------------------|-----------|--------|-------|--------|---------|------------|---------------|
| ENSMUSG00000026393 | 4385.397  | -0.347 | 0.089 | -3.901 | 9.6E-05 | 0.00045471 | Nek7          |
| ENSMUSG00000022462 | 5212.006  | -0.347 | 0.107 | -3.253 | 1.1E-03 | 0.0044877  | Slc38a2       |
| ENSMUSG00000054808 | 12468.635 | -0.347 | 0.074 | -4.687 | 2.8E-06 | 1.6581E-05 | Actn4         |
| ENSMUSG00000042997 | 1668.198  | -0.348 | 0.114 | -3.056 | 2.2E-03 | 0.00830578 | Nhlrc3        |
| ENSMUSG00000049960 | 2043.329  | -0.349 | 0.109 | -3.193 | 1.4E-03 | 0.00542541 | Mrps16        |
| ENSMUSG00000021606 | 5324.363  | -0.349 | 0.109 | -3.207 | 1.3E-03 | 0.00518858 | Ndufs6        |
| ENSMUSG00000052833 | 5248.843  | -0.349 | 0.088 | -3.992 | 6.5E-05 | 0.00032083 | Sae1          |
| ENSMUSG00000030869 | 1280.535  | -0.350 | 0.099 | -3.545 | 3.9E-04 | 0.00167977 | Ndufab1       |
| ENSMUSG00000060126 | 8916.367  | -0.350 | 0.108 | -3.255 | 1.1E-03 | 0.004459   | Tpt1          |
| ENSMUSG00000028648 | 1030.007  | -0.350 | 0.129 | -2.704 | 6.9E-03 | 0.02252045 | Ndufs5        |
| ENSMUSG00000029111 | 3124.166  | -0.350 | 0.085 | -4.138 | 3.5E-05 | 0.00017803 | Nelfa         |
| ENSMUSG00000050705 | 899.713   | -0.350 | 0.125 | -2.803 | 5.1E-03 | 0.01726784 | 2310061I04Rik |
| ENSMUSG00000036309 | 12157.676 | -0.351 | 0.056 | -6.292 | 3.1E-10 | 2.8843E-09 | Skp1          |
| ENSMUSG00000045948 | 2241.437  | -0.351 | 0.096 | -3.656 | 2.6E-04 | 0.00113634 | Mrps12        |
| ENSMUSG00000104280 | 403.874   | -0.351 | 0.145 | -2.423 | 1.5E-02 | 0.04576702 | Rps2-ps11     |
| ENSMUSG00000024383 | 1173.480  | -0.352 | 0.120 | -2.925 | 3.4E-03 | 0.01222152 | Map3k2        |
| ENSMUSG00000030987 | 2791.281  | -0.352 | 0.098 | -3.597 | 3.2E-04 | 0.00139884 | Stim1         |
| ENSMUSG00000053453 | 741.534   | -0.353 | 0.146 | -2.424 | 1.5E-02 | 0.04567296 | Thoc7         |
| ENSMUSG00000056342 | 1158.948  | -0.353 | 0.131 | -2.685 | 7.3E-03 | 0.02363413 | Usp34         |
| ENSMUSG00000090862 | 4216.040  | -0.353 | 0.107 | -3.297 | 9.8E-04 | 0.0038798  | Rps13         |
| ENSMUSG00000025155 | 2608.755  | -0.354 | 0.099 | -3.575 | 3.5E-04 | 0.0015148  | Dus11         |
| ENSMUSG00000030588 | 3380.871  | -0.354 | 0.084 | -4.219 | 2.5E-05 | 0.00012793 | Yif1b         |
| ENSMUSG00000027263 | 1780.038  | -0.354 | 0.122 | -2.895 | 3.8E-03 | 0.0133095  | Tubgcp4       |
| ENSMUSG00000033272 | 5556.013  | -0.354 | 0.091 | -3.883 | 1.0E-04 | 0.00048861 | Slc35a4       |
| ENSMUSG00000037759 | 1075.607  | -0.355 | 0.139 | -2.542 | 1.1E-02 | 0.03405974 | Ptger2        |
| ENSMUSG00000027506 | 18462.960 | -0.355 | 0.084 | -4.227 | 2.4E-05 | 0.00012356 | Tpd52         |
| ENSMUSG00000037957 | 1838.526  | -0.355 | 0.136 | -2.605 | 9.2E-03 | 0.02905281 | Wdr20         |
| ENSMUSG00000022884 | 3576.090  | -0.355 | 0.093 | -3.820 | 1.3E-04 | 0.00062176 | Eif4a2        |
| ENSMUSG00000031352 | 2355.512  | -0.355 | 0.091 | -3.906 | 9.4E-05 | 0.00044691 | Hccs          |
| ENSMUSG00000042043 | 3579.972  | -0.355 | 0.119 | -2.990 | 2.8E-03 | 0.01012615 | Tbca          |
| ENSMUSG00000063316 | 4149.069  | -0.356 | 0.111 | -3.209 | 1.3E-03 | 0.00515895 | Rpl27         |
| ENSMUSG00000034006 | 2615.496  | -0.356 | 0.109 | -3.280 | 1.0E-03 | 0.00410511 | Slc66a2       |
| ENSMUSG00000006442 | 5373.305  | -0.356 | 0.144 | -2.473 | 1.3E-02 | 0.04048194 | Srm           |
| ENSMUSG00000022434 | 830.937   | -0.357 | 0.136 | -2.613 | 9.0E-03 | 0.02845046 | Fam118a       |
| ENSMUSG00000040451 | 2905.464  | -0.357 | 0.126 | -2.825 | 4.7E-03 | 0.01626237 | Sgms1         |
| ENSMUSG00000024498 | 4250.860  | -0.357 | 0.103 | -3.467 | 5.3E-04 | 0.00219922 | Tcerg1        |
| ENSMUSG00000013495 | 1609.476  | -0.357 | 0.135 | -2.646 | 8.1E-03 | 0.02614705 | Tmem175       |
| ENSMUSG00000024622 | 1528.448  | -0.357 | 0.126 | -2.839 | 4.5E-03 | 0.0156141  | Hmgxb3        |
| ENSMUSG00000070003 | 8992.438  | -0.357 | 0.116 | -3.073 | 2.1E-03 | 0.00787634 | Ssbp4         |
| ENSMUSG00000024571 | 6960.809  | -0.358 | 0.076 | -4.704 | 2.6E-06 | 1.5317E-05 | Gm16286       |
| ENSMUSG00000036980 | 1384.551  | -0.359 | 0.099 | -3.623 | 2.9E-04 | 0.00127799 | Taf6          |
| ENSMUSG00000027673 | 2600.072  | -0.360 | 0.084 | -4.261 | 2.0E-05 | 0.00010733 | Ndufb5        |
| ENSMUSG00000030335 | 2183.662  | -0.360 | 0.105 | -3.441 | 5.8E-04 | 0.00240331 | Mrp151        |
| ENSMUSG00000036748 | 4490.079  | -0.360 | 0.076 | -4.731 | 2.2E-06 | 1.3497E-05 | Cuedc2        |
| ENSMUSG00000028138 | 6039.210  | -0.360 | 0.068 | -5.267 | 1.4E-07 | 9.7385E-07 | Adh5          |
| ENSMUSG00000037916 | 4412.902  | -0.361 | 0.075 | -4.824 | 1.4E-06 | 8.6837E-06 | Ndufv1        |
| ENSMUSG00000075467 | 1761.640  | -0.361 | 0.116 | -3.118 | 1.8E-03 | 0.00685481 | Dnlz          |
| ENSMUSG00000030086 | 801.220   | -0.361 | 0.137 | -2.643 | 8.2E-03 | 0.02634711 | Chchd6        |
| ENSMUSG00000055093 | 627.988   | -0.362 | 0.127 | -2.851 | 4.4E-03 | 0.01510203 | Rps27a-ps3    |
| ENSMUSG00000063884 | 1572.954  | -0.362 | 0.145 | -2.503 | 1.2E-02 | 0.03764046 | Ptcd3         |
| ENSMUSG00000041879 | 2321.307  | -0.362 | 0.140 | -2.594 | 9.5E-03 | 0.02982498 | Ipo9          |
| ENSMUSG00000068396 | 1076.408  | -0.363 | 0.108 | -3.345 | 8.2E-04 | 0.00332057 | Rpl34-ps1     |

|                    |           |        |       |        |         |            |               |
|--------------------|-----------|--------|-------|--------|---------|------------|---------------|
| ENSMUSG00000033918 | 3229.816  | -0.363 | 0.089 | -4.086 | 4.4E-05 | 0.0002204  | Parl          |
| ENSMUSG00000002763 | 1845.189  | -0.363 | 0.125 | -2.919 | 3.5E-03 | 0.01243729 | Pex6          |
| ENSMUSG00000054226 | 796.684   | -0.363 | 0.150 | -2.419 | 1.6E-02 | 0.04614307 | Tprkb         |
| ENSMUSG00000046756 | 4443.915  | -0.364 | 0.084 | -4.347 | 1.4E-05 | 7.4706E-05 | Mrps7         |
| ENSMUSG00000001105 | 2327.788  | -0.364 | 0.112 | -3.241 | 1.2E-03 | 0.0046596  | Ift20         |
| ENSMUSG00000067071 | 1582.708  | -0.364 | 0.129 | -2.824 | 4.7E-03 | 0.01631144 | Hes6          |
| ENSMUSG00000031703 | 2569.266  | -0.364 | 0.084 | -4.359 | 1.3E-05 | 7.1084E-05 | Itfg1         |
| ENSMUSG00000026283 | 1010.205  | -0.365 | 0.141 | -2.587 | 9.7E-03 | 0.0303966  | Ing5          |
| ENSMUSG00000027953 | 1748.528  | -0.365 | 0.113 | -3.235 | 1.2E-03 | 0.00474234 | Slc50a1       |
| ENSMUSG00000029171 | 1918.102  | -0.367 | 0.100 | -3.659 | 2.5E-04 | 0.00112626 | Pgm2          |
| ENSMUSG00000054309 | 3461.550  | -0.367 | 0.099 | -3.724 | 2.0E-04 | 0.00088794 | Cpsf3         |
| ENSMUSG00000032244 | 1695.538  | -0.367 | 0.128 | -2.858 | 4.3E-03 | 0.01477434 | Fem1b         |
| ENSMUSG00000020180 | 2365.875  | -0.367 | 0.109 | -3.363 | 7.7E-04 | 0.003124   | Snrpd3        |
| ENSMUSG00000034377 | 1358.638  | -0.367 | 0.121 | -3.038 | 2.4E-03 | 0.00876887 | Tulp4         |
| ENSMUSG00000108452 | 353.816   | -0.368 | 0.149 | -2.471 | 1.3E-02 | 0.04063242 | 4930413G21Rik |
| ENSMUSG00000093674 | 18194.214 | -0.368 | 0.142 | -2.583 | 9.8E-03 | 0.03063927 | Rpl41         |
| ENSMUSG00000031983 | 2212.428  | -0.368 | 0.124 | -2.960 | 3.1E-03 | 0.01103561 | 2310022B05Rik |
| ENSMUSG00000039361 | 23190.491 | -0.369 | 0.126 | -2.916 | 3.5E-03 | 0.01252541 | Picalm        |
| ENSMUSG00000002107 | 7026.421  | -0.369 | 0.111 | -3.325 | 8.8E-04 | 0.00353972 | Celf2         |
| ENSMUSG00000031591 | 17551.098 | -0.369 | 0.091 | -4.063 | 4.8E-05 | 0.0002422  | Asah1         |
| ENSMUSG00000022674 | 449.245   | -0.370 | 0.152 | -2.427 | 1.5E-02 | 0.04534314 | Ube2v2        |
| ENSMUSG00000004319 | 1790.465  | -0.371 | 0.128 | -2.900 | 3.7E-03 | 0.01312659 | Clcn3         |
| ENSMUSG00000029772 | 3659.860  | -0.372 | 0.143 | -2.594 | 9.5E-03 | 0.02982645 | Ahcy12        |
| ENSMUSG00000024269 | 1572.057  | -0.372 | 0.108 | -3.439 | 5.8E-04 | 0.00241843 | Tpgs2         |
| ENSMUSG00000020224 | 1419.606  | -0.372 | 0.110 | -3.382 | 7.2E-04 | 0.00293133 | Llph          |
| ENSMUSG00000042323 | 4105.650  | -0.372 | 0.084 | -4.442 | 8.9E-06 | 4.9897E-05 | Pbrm1         |
| ENSMUSG00000029577 | 2566.924  | -0.372 | 0.137 | -2.721 | 6.5E-03 | 0.02150734 | Ube3b         |
| ENSMUSG00000047804 | 1852.319  | -0.372 | 0.120 | -3.100 | 1.9E-03 | 0.00725242 | Akap10        |
| ENSMUSG00000039745 | 4846.685  | -0.372 | 0.076 | -4.908 | 9.2E-07 | 5.8266E-06 | Htatip2       |
| ENSMUSG00000073838 | 1862.495  | -0.373 | 0.122 | -3.062 | 2.2E-03 | 0.00815667 | Tufm          |
| ENSMUSG00000029482 | 2071.527  | -0.373 | 0.145 | -2.577 | 1.0E-02 | 0.03112779 | Aacs          |
| ENSMUSG00000068580 | 1562.073  | -0.373 | 0.126 | -2.952 | 3.2E-03 | 0.01129798 | Zfyve19       |
| ENSMUSG00000074238 | 1491.362  | -0.373 | 0.132 | -2.820 | 4.8E-03 | 0.01648287 | Ap1ar         |
| ENSMUSG00000030879 | 5701.353  | -0.373 | 0.073 | -5.127 | 2.9E-07 | 1.9852E-06 | Mrpl17        |
| ENSMUSG00000017802 | 983.200   | -0.373 | 0.135 | -2.772 | 5.6E-03 | 0.01878121 | Retreg3       |
| ENSMUSG00000032078 | 3247.260  | -0.374 | 0.109 | -3.432 | 6.0E-04 | 0.00247524 | Zpr1          |
| ENSMUSG00000020308 | 2194.452  | -0.375 | 0.117 | -3.204 | 1.4E-03 | 0.00523663 | Tpgs1         |
| ENSMUSG00000026107 | 1910.302  | -0.375 | 0.145 | -2.580 | 9.9E-03 | 0.03087945 | Nabp1         |
| ENSMUSG00000017132 | 6489.944  | -0.375 | 0.109 | -3.451 | 5.6E-04 | 0.00231828 | Cyth1         |
| ENSMUSG00000028580 | 5598.658  | -0.375 | 0.095 | -3.934 | 8.3E-05 | 0.00040111 | Pum1          |
| ENSMUSG00000029759 | 3953.602  | -0.376 | 0.099 | -3.805 | 1.4E-04 | 0.0006566  | Pon3          |
| ENSMUSG00000042444 | 1604.933  | -0.376 | 0.155 | -2.428 | 1.5E-02 | 0.0451737  | Mindy2        |
| ENSMUSG00000014592 | 677.489   | -0.376 | 0.137 | -2.749 | 6.0E-03 | 0.01995278 | Camta1        |
| ENSMUSG00000037938 | 715.789   | -0.376 | 0.138 | -2.729 | 6.3E-03 | 0.02103965 | Chchd5        |
| ENSMUSG00000047284 | 886.091   | -0.377 | 0.152 | -2.473 | 1.3E-02 | 0.04048194 | Neurl4        |
| ENSMUSG00000028433 | 1704.972  | -0.377 | 0.100 | -3.766 | 1.7E-04 | 0.00076107 | Ubp2          |
| ENSMUSG00000061904 | 20657.196 | -0.378 | 0.060 | -6.283 | 3.3E-10 | 3.0623E-09 | Slc25a3       |
| ENSMUSG00000029920 | 1133.074  | -0.378 | 0.111 | -3.414 | 6.4E-04 | 0.00263006 | Smarcad1      |
| ENSMUSG00000021290 | 4641.229  | -0.378 | 0.131 | -2.894 | 3.8E-03 | 0.01334092 | Atp5mpl       |
| ENSMUSG00000040234 | 1611.902  | -0.378 | 0.105 | -3.595 | 3.2E-04 | 0.00140844 | Tm7sf3        |
| ENSMUSG00000031479 | 3144.094  | -0.378 | 0.081 | -4.640 | 3.5E-06 | 2.0546E-05 | Vps36         |
| ENSMUSG00000030062 | 15790.489 | -0.378 | 0.061 | -6.168 | 6.9E-10 | 6.1644E-09 | Rpn1          |

|                     |           |        |       |        |         |            |               |
|---------------------|-----------|--------|-------|--------|---------|------------|---------------|
| ENSMUSG00000073155  | 5209.130  | -0.379 | 0.140 | -2.712 | 6.7E-03 | 0.02204166 | 1810058I24Rik |
| ENSMUSG00000035206  | 1713.413  | -0.379 | 0.134 | -2.833 | 4.6E-03 | 0.01586129 | Spp12b        |
| ENSMUSG00000040331  | 2651.528  | -0.379 | 0.101 | -3.757 | 1.7E-04 | 0.00078549 | Nsmce4a       |
| ENSMUSG00000006527  | 1674.703  | -0.379 | 0.127 | -2.985 | 2.8E-03 | 0.01025835 | Sfmbt1        |
| ENSMUSG000000065954 | 7105.076  | -0.380 | 0.086 | -4.438 | 9.1E-06 | 5.0682E-05 | Tacc1         |
| ENSMUSG00000025728  | 2043.581  | -0.380 | 0.135 | -2.827 | 4.7E-03 | 0.01617519 | Pigq          |
| ENSMUSG00000031505  | 2481.928  | -0.381 | 0.104 | -3.673 | 2.4E-04 | 0.0010714  | Naxd          |
| ENSMUSG00000040940  | 8971.626  | -0.381 | 0.059 | -6.435 | 1.2E-10 | 1.1772E-09 | Arhgef1       |
| ENSMUSG00000020241  | 2574.439  | -0.381 | 0.115 | -3.318 | 9.1E-04 | 0.00362609 | Col6a2        |
| ENSMUSG00000031816  | 947.335   | -0.381 | 0.138 | -2.770 | 5.6E-03 | 0.01888311 | Mthfsd        |
| ENSMUSG00000025147  | 2105.055  | -0.381 | 0.103 | -3.713 | 2.0E-04 | 0.00092413 | Mob2          |
| ENSMUSG00000028798  | 5643.578  | -0.382 | 0.081 | -4.727 | 2.3E-06 | 1.3753E-05 | Eif3i         |
| ENSMUSG00000028334  | 3161.574  | -0.383 | 0.098 | -3.926 | 8.6E-05 | 0.00041371 | Nans          |
| ENSMUSG00000043445  | 5644.739  | -0.383 | 0.088 | -4.377 | 1.2E-05 | 6.575E-05  | Pgp           |
| ENSMUSG00000083844  | 578.287   | -0.383 | 0.144 | -2.663 | 7.7E-03 | 0.02501675 | Ube2d-ps      |
| ENSMUSG00000038290  | 1022.604  | -0.383 | 0.133 | -2.881 | 4.0E-03 | 0.0138457  | Smg6          |
| ENSMUSG00000022814  | 2301.875  | -0.384 | 0.101 | -3.811 | 1.4E-04 | 0.00064422 | Umps          |
| ENSMUSG00000036257  | 1999.254  | -0.384 | 0.153 | -2.506 | 1.2E-02 | 0.03728306 | Pnpla8        |
| ENSMUSG00000020739  | 1545.772  | -0.384 | 0.145 | -2.648 | 8.1E-03 | 0.02601539 | Nup85         |
| ENSMUSG00000020521  | 2862.294  | -0.385 | 0.102 | -3.778 | 1.6E-04 | 0.00072627 | Rnft1         |
| ENSMUSG00000050668  | 959.850   | -0.385 | 0.143 | -2.686 | 7.2E-03 | 0.02357922 | Gpatch11      |
| ENSMUSG00000003234  | 3128.305  | -0.386 | 0.141 | -2.739 | 6.2E-03 | 0.02051958 | Abcf3         |
| ENSMUSG00000025702  | 2651.347  | -0.386 | 0.094 | -4.126 | 3.7E-05 | 0.00018711 | Marchf8       |
| ENSMUSG00000021411  | 892.625   | -0.388 | 0.148 | -2.626 | 8.6E-03 | 0.02755309 | Pxdc1         |
| ENSMUSG00000012483  | 573.567   | -0.388 | 0.145 | -2.677 | 7.4E-03 | 0.02412191 | Rpa3          |
| ENSMUSG00000024974  | 2141.396  | -0.388 | 0.105 | -3.714 | 2.0E-04 | 0.00092173 | Smc3          |
| ENSMUSG00000038708  | 2504.085  | -0.389 | 0.098 | -3.975 | 7.0E-05 | 0.00034256 | Golga4        |
| ENSMUSG00000037072  | 25542.904 | -0.389 | 0.067 | -5.798 | 6.7E-09 | 5.4467E-08 | Selenof       |
| ENSMUSG00000031570  | 1464.880  | -0.389 | 0.120 | -3.251 | 1.1E-03 | 0.00451563 | Plpp5         |
| ENSMUSG00000039244  | 1510.395  | -0.389 | 0.120 | -3.255 | 1.1E-03 | 0.00446259 | E130309D02Rik |
| ENSMUSG00000034290  | 2221.481  | -0.389 | 0.137 | -2.841 | 4.5E-03 | 0.01555193 | Nek9          |
| ENSMUSG00000000959  | 839.012   | -0.390 | 0.155 | -2.518 | 1.2E-02 | 0.03627098 | Oxa11         |
| ENSMUSG00000025571  | 1221.937  | -0.390 | 0.163 | -2.394 | 1.7E-02 | 0.04895395 | Tnrc6c        |
| ENSMUSG00000063275  | 1204.586  | -0.390 | 0.153 | -2.544 | 1.1E-02 | 0.0339504  | Hacd1         |
| ENSMUSG00000047215  | 4940.522  | -0.390 | 0.129 | -3.026 | 2.5E-03 | 0.00906788 | Rp19          |
| ENSMUSG00000046675  | 1973.517  | -0.390 | 0.133 | -2.923 | 3.5E-03 | 0.01228498 | Tmem251       |
| ENSMUSG00000005882  | 2249.523  | -0.390 | 0.132 | -2.949 | 3.2E-03 | 0.01142049 | Uqcc1         |
| ENSMUSG00000051232  | 1703.714  | -0.390 | 0.117 | -3.334 | 8.6E-04 | 0.00343692 | Tmem199       |
| ENSMUSG00000041453  | 3548.977  | -0.390 | 0.123 | -3.177 | 1.5E-03 | 0.00571251 | Rpl21         |
| ENSMUSG00000037742  | 85616.822 | -0.391 | 0.057 | -6.875 | 6.2E-12 | 6.5463E-11 | Eef1a1        |
| ENSMUSG00000078122  | 5304.987  | -0.391 | 0.142 | -2.749 | 6.0E-03 | 0.01993675 | F630028O10Rik |
| ENSMUSG00000032966  | 18562.212 | -0.391 | 0.072 | -5.404 | 6.5E-08 | 4.7721E-07 | Fkbp1a        |
| ENSMUSG00000039427  | 1252.775  | -0.391 | 0.124 | -3.159 | 1.6E-03 | 0.00604323 | Alg1          |
| ENSMUSG00000027180  | 1509.734  | -0.392 | 0.127 | -3.085 | 2.0E-03 | 0.00760222 | Fbxo3         |
| ENSMUSG00000047036  | 1466.239  | -0.392 | 0.142 | -2.759 | 5.8E-03 | 0.01943326 | Zfp445        |
| ENSMUSG00000057036  | 299.719   | -0.392 | 0.141 | -2.780 | 5.4E-03 | 0.01838628 | Gm7536        |
| ENSMUSG00000007812  | 1908.568  | -0.392 | 0.118 | -3.331 | 8.6E-04 | 0.00346577 | Zfp655        |
| ENSMUSG00000001707  | 1721.442  | -0.393 | 0.123 | -3.181 | 1.5E-03 | 0.00564898 | Eef1e1        |
| ENSMUSG00000027618  | 1347.055  | -0.393 | 0.099 | -3.963 | 7.4E-05 | 0.00035883 | Nfs1          |
| ENSMUSG00000030036  | 2879.332  | -0.393 | 0.114 | -3.457 | 5.5E-04 | 0.00227474 | Mogs          |
| ENSMUSG00000052688  | 12232.495 | -0.394 | 0.126 | -3.137 | 1.7E-03 | 0.00647741 | Rab7b         |
| ENSMUSG00000024357  | 1433.696  | -0.394 | 0.139 | -2.829 | 4.7E-03 | 0.01607856 | Sil1          |

|                    |           |        |       |        |         |            |               |
|--------------------|-----------|--------|-------|--------|---------|------------|---------------|
| ENSMUSG00000035545 | 2607.827  | -0.394 | 0.155 | -2.539 | 1.1E-02 | 0.0343447  | Leng8         |
| ENSMUSG00000057572 | 620.490   | -0.394 | 0.145 | -2.718 | 6.6E-03 | 0.02171286 | Zbtb8os       |
| ENSMUSG00000089911 | 2135.780  | -0.394 | 0.112 | -3.527 | 4.2E-04 | 0.00178871 | Mfsd14a       |
| ENSMUSG00000005982 | 1380.842  | -0.395 | 0.118 | -3.349 | 8.1E-04 | 0.00327542 | Naa60         |
| ENSMUSG00000030347 | 1220.378  | -0.395 | 0.132 | -3.005 | 2.7E-03 | 0.00966648 | D6Wsu163e     |
| ENSMUSG00000083483 | 295.325   | -0.396 | 0.147 | -2.685 | 7.3E-03 | 0.02363413 | Gm14044       |
| ENSMUSG00000027312 | 3166.616  | -0.396 | 0.127 | -3.106 | 1.9E-03 | 0.00713278 | Atrn          |
| ENSMUSG00000032381 | 9100.521  | -0.396 | 0.078 | -5.074 | 3.9E-07 | 2.5684E-06 | Ciao2a        |
| ENSMUSG00000058655 | 4038.091  | -0.396 | 0.068 | -5.864 | 4.5E-09 | 3.7341E-08 | Eif4b         |
| ENSMUSG00000059775 | 415.208   | -0.396 | 0.130 | -3.057 | 2.2E-03 | 0.00826594 | Rps26-ps1     |
| ENSMUSG00000002221 | 1065.663  | -0.397 | 0.139 | -2.859 | 4.2E-03 | 0.01474333 | Paxipl        |
| ENSMUSG00000025102 | 885.410   | -0.397 | 0.136 | -2.913 | 3.6E-03 | 0.01262186 | 3110040N11Rik |
| ENSMUSG00000020644 | 28172.681 | -0.397 | 0.122 | -3.248 | 1.2E-03 | 0.00456651 | Id2           |
| ENSMUSG00000030744 | 34523.349 | -0.397 | 0.078 | -5.096 | 3.5E-07 | 2.3111E-06 | Rps3          |
| ENSMUSG00000022186 | 4094.992  | -0.397 | 0.115 | -3.465 | 5.3E-04 | 0.00221089 | Oxct1         |
| ENSMUSG00000031387 | 9996.406  | -0.397 | 0.078 | -5.090 | 3.6E-07 | 2.3817E-06 | Renbp         |
| ENSMUSG00000003680 | 1983.135  | -0.398 | 0.133 | -2.991 | 2.8E-03 | 0.010087   | Taf6l         |
| ENSMUSG00000026643 | 2477.181  | -0.399 | 0.109 | -3.655 | 2.6E-04 | 0.00114302 | Nmt2          |
| ENSMUSG00000026037 | 703.559   | -0.399 | 0.119 | -3.362 | 7.7E-04 | 0.00313121 | Orc2          |
| ENSMUSG00000024053 | 8208.392  | -0.399 | 0.106 | -3.753 | 1.7E-04 | 0.00079891 | Emilin2       |
| ENSMUSG00000002345 | 1059.067  | -0.399 | 0.124 | -3.220 | 1.3E-03 | 0.00499081 | Borcs8        |
| ENSMUSG00000037373 | 14512.895 | -0.401 | 0.067 | -5.996 | 2.0E-09 | 1.7344E-08 | Ctbp1         |
| ENSMUSG00000040354 | 2551.977  | -0.401 | 0.125 | -3.208 | 1.3E-03 | 0.00517758 | Mars1         |
| ENSMUSG00000021213 | 1189.536  | -0.401 | 0.139 | -2.892 | 3.8E-03 | 0.01341689 | Akr1c13       |
| ENSMUSG00000032870 | 2748.461  | -0.401 | 0.088 | -4.569 | 4.9E-06 | 2.8311E-05 | Smap2         |
| ENSMUSG00000023495 | 845.359   | -0.401 | 0.147 | -2.722 | 6.5E-03 | 0.02147574 | Pcbp4         |
| ENSMUSG00000027649 | 1862.089  | -0.402 | 0.110 | -3.665 | 2.5E-04 | 0.00110108 | Ctnnb11       |
| ENSMUSG00000002342 | 2548.528  | -0.403 | 0.121 | -3.329 | 8.7E-04 | 0.00349082 | Tmem161a      |
| ENSMUSG00000029202 | 864.294   | -0.404 | 0.133 | -3.033 | 2.4E-03 | 0.00888499 | Pds5a         |
| ENSMUSG00000021969 | 4026.791  | -0.404 | 0.088 | -4.567 | 4.9E-06 | 2.8497E-05 | Zdhhc20       |
| ENSMUSG00000006715 | 1034.442  | -0.404 | 0.147 | -2.753 | 5.9E-03 | 0.01972934 | Gmnn          |
| ENSMUSG00000027968 | 1512.698  | -0.404 | 0.121 | -3.347 | 8.2E-04 | 0.00329485 | Larp7         |
| ENSMUSG00000026123 | 8471.098  | -0.405 | 0.107 | -3.797 | 1.5E-04 | 0.00067918 | Plekhb2       |
| ENSMUSG00000039887 | 863.089   | -0.405 | 0.146 | -2.779 | 5.5E-03 | 0.01843436 | Alg14         |
| ENSMUSG00000117167 | 334.311   | -0.405 | 0.149 | -2.711 | 6.7E-03 | 0.0221346  | Gm6599        |
| ENSMUSG00000025223 | 1704.982  | -0.406 | 0.144 | -2.822 | 4.8E-03 | 0.01639829 | Ldb1          |
| ENSMUSG00000019804 | 22400.226 | -0.406 | 0.068 | -5.950 | 2.7E-09 | 2.2633E-08 | Snx3          |
| ENSMUSG00000041415 | 947.476   | -0.407 | 0.143 | -2.838 | 4.5E-03 | 0.01567105 | Dicer1        |
| ENSMUSG00000000420 | 3221.879  | -0.407 | 0.128 | -3.190 | 1.4E-03 | 0.00548619 | Galnt1        |
| ENSMUSG00000021957 | 21337.923 | -0.408 | 0.072 | -5.666 | 1.5E-08 | 1.144E-07  | Tkt           |
| ENSMUSG00000026634 | 2308.960  | -0.408 | 0.121 | -3.370 | 7.5E-04 | 0.00304626 | Angel2        |
| ENSMUSG00000047879 | 4693.313  | -0.408 | 0.092 | -4.437 | 9.1E-06 | 5.0831E-05 | Usp14         |
| ENSMUSG00000032757 | 2013.191  | -0.408 | 0.093 | -4.395 | 1.1E-05 | 6.0886E-05 | Bet1          |
| ENSMUSG00000004071 | 2071.420  | -0.408 | 0.092 | -4.457 | 8.3E-06 | 4.6652E-05 | Cdip1         |
| ENSMUSG00000027288 | 5594.194  | -0.409 | 0.081 | -5.057 | 4.3E-07 | 2.7907E-06 | Zfp106        |
| ENSMUSG00000117515 | 182.532   | -0.409 | 0.171 | -2.399 | 1.6E-02 | 0.04846755 | Gm6883        |
| ENSMUSG00000085875 | 385.880   | -0.410 | 0.169 | -2.425 | 1.5E-02 | 0.04552416 | Gm12905       |
| ENSMUSG00000028274 | 2308.348  | -0.410 | 0.093 | -4.423 | 9.7E-06 | 5.4032E-05 | Rngtt         |
| ENSMUSG00000051256 | 2327.786  | -0.411 | 0.099 | -4.146 | 3.4E-05 | 0.00017226 | Jagn1         |
| ENSMUSG00000021193 | 4225.673  | -0.411 | 0.092 | -4.479 | 7.5E-06 | 4.2454E-05 | Pitrm1        |
| ENSMUSG00000025374 | 1869.488  | -0.412 | 0.114 | -3.625 | 2.9E-04 | 0.00127085 | Nabp2         |
| ENSMUSG00000009470 | 2516.894  | -0.412 | 0.098 | -4.225 | 2.4E-05 | 0.00012489 | Tnpol         |

|                    |            |        |       |        |         |            |          |
|--------------------|------------|--------|-------|--------|---------|------------|----------|
| ENSMUSG00000096210 | 2660.031   | -0.413 | 0.093 | -4.415 | 1.0E-05 | 5.5953E-05 | Hlf0     |
| ENSMUSG00000039771 | 967.582    | -0.413 | 0.160 | -2.572 | 1.0E-02 | 0.03154967 | Polr2j   |
| ENSMUSG00000064370 | 130889.289 | -0.413 | 0.088 | -4.671 | 3.0E-06 | 1.7882E-05 | mt-Cytb  |
| ENSMUSG00000029614 | 7238.969   | -0.414 | 0.112 | -3.705 | 2.1E-04 | 0.00094914 | Rpl6     |
| ENSMUSG00000023169 | 3470.589   | -0.414 | 0.129 | -3.210 | 1.3E-03 | 0.00514194 | Slc38a1  |
| ENSMUSG00000031229 | 2511.167   | -0.415 | 0.101 | -4.100 | 4.1E-05 | 0.00020875 | Atrx     |
| ENSMUSG00000030034 | 1062.077   | -0.415 | 0.150 | -2.773 | 5.5E-03 | 0.01870079 | Ino80b   |
| ENSMUSG00000037458 | 6767.288   | -0.416 | 0.090 | -4.594 | 4.3E-06 | 2.5274E-05 | Azin1    |
| ENSMUSG00000063739 | 209.046    | -0.416 | 0.174 | -2.388 | 1.7E-02 | 0.04963111 | Gm4963   |
| ENSMUSG00000002846 | 1630.961   | -0.416 | 0.085 | -4.881 | 1.1E-06 | 6.6212E-06 | Timmdc1  |
| ENSMUSG00000063334 | 1028.978   | -0.417 | 0.121 | -3.452 | 5.6E-04 | 0.002311   | Krr1     |
| ENSMUSG00000024188 | 2556.194   | -0.417 | 0.101 | -4.140 | 3.5E-05 | 0.0001766  | Luc7l    |
| ENSMUSG00000038633 | 17838.994  | -0.417 | 0.055 | -7.521 | 5.4E-14 | 6.7628E-13 | Degs1    |
| ENSMUSG00000021149 | 3239.749   | -0.417 | 0.123 | -3.380 | 7.2E-04 | 0.00294551 | Gtpbp4   |
| ENSMUSG00000031432 | 1125.001   | -0.417 | 0.142 | -2.943 | 3.2E-03 | 0.01161058 | Prps1    |
| ENSMUSG00000052962 | 1933.120   | -0.418 | 0.126 | -3.305 | 9.5E-04 | 0.00377916 | Mrpl35   |
| ENSMUSG00000066306 | 1794.537   | -0.418 | 0.131 | -3.182 | 1.5E-03 | 0.00563219 | Numa1    |
| ENSMUSG00000027601 | 1411.948   | -0.418 | 0.102 | -4.094 | 4.2E-05 | 0.00021361 | Mtfr1    |
| ENSMUSG00000028744 | 3866.003   | -0.418 | 0.116 | -3.591 | 3.3E-04 | 0.00143185 | Slc66a1  |
| ENSMUSG00000083337 | 360.494    | -0.418 | 0.144 | -2.896 | 3.8E-03 | 0.0132702  | Gm11539  |
| ENSMUSG00000037706 | 8954.746   | -0.420 | 0.130 | -3.236 | 1.2E-03 | 0.0047388  | Cd81     |
| ENSMUSG00000018196 | 1861.007   | -0.420 | 0.103 | -4.081 | 4.5E-05 | 0.00022552 | Glr2     |
| ENSMUSG00000021820 | 975.683    | -0.420 | 0.161 | -2.601 | 9.3E-03 | 0.0293128  | Camk2g   |
| ENSMUSG00000024045 | 2242.515   | -0.420 | 0.107 | -3.946 | 7.9E-05 | 0.00038318 | Akap8    |
| ENSMUSG00000028333 | 5739.146   | -0.420 | 0.071 | -5.914 | 3.3E-09 | 2.8041E-08 | Anp32b   |
| ENSMUSG00000004044 | 3688.448   | -0.421 | 0.111 | -3.780 | 1.6E-04 | 0.00072092 | Cavin1   |
| ENSMUSG00000045996 | 509.537    | -0.421 | 0.126 | -3.345 | 8.2E-04 | 0.00332057 | Polr2k   |
| ENSMUSG00000025949 | 2288.689   | -0.421 | 0.143 | -2.944 | 3.2E-03 | 0.01158092 | Pikfyve  |
| ENSMUSG00000031157 | 1488.980   | -0.422 | 0.124 | -3.415 | 6.4E-04 | 0.00262331 | Pqbp1    |
| ENSMUSG00000017404 | 7530.934   | -0.422 | 0.136 | -3.113 | 1.9E-03 | 0.00698547 | Rpl19    |
| ENSMUSG00000113151 | 215.752    | -0.422 | 0.164 | -2.575 | 1.0E-02 | 0.03125807 | Gm48690  |
| ENSMUSG00000034187 | 6199.389   | -0.422 | 0.086 | -4.911 | 9.0E-07 | 5.7229E-06 | Nsf      |
| ENSMUSG00000052298 | 7321.859   | -0.423 | 0.092 | -4.596 | 4.3E-06 | 2.5085E-05 | Cdc42se2 |
| ENSMUSG00000014355 | 1556.162   | -0.423 | 0.112 | -3.783 | 1.6E-04 | 0.00071543 | Anapc1   |
| ENSMUSG00000027286 | 946.167    | -0.423 | 0.137 | -3.080 | 2.1E-03 | 0.0077036  | Lrrc57   |
| ENSMUSG00000075706 | 11389.930  | -0.423 | 0.072 | -5.860 | 4.6E-09 | 3.824E-08  | Gpx4     |
| ENSMUSG00000070972 | 735.120    | -0.424 | 0.127 | -3.340 | 8.4E-04 | 0.00337127 | Dnajc25  |
| ENSMUSG00000021893 | 1697.781   | -0.424 | 0.129 | -3.279 | 1.0E-03 | 0.00412132 | Capn7    |
| ENSMUSG00000030168 | 10188.030  | -0.424 | 0.082 | -5.187 | 2.1E-07 | 1.4611E-06 | Adipor2  |
| ENSMUSG00000036887 | 66524.110  | -0.424 | 0.134 | -3.175 | 1.5E-03 | 0.00575106 | C1qa     |
| ENSMUSG00000025816 | 498.890    | -0.424 | 0.165 | -2.573 | 1.0E-02 | 0.03148733 | Sec61a2  |
| ENSMUSG00000027374 | 1117.044   | -0.424 | 0.154 | -2.747 | 6.0E-03 | 0.02008073 | Mrps5    |
| ENSMUSG00000063696 | 2204.426   | -0.424 | 0.090 | -4.731 | 2.2E-06 | 1.3538E-05 | Gm8730   |
| ENSMUSG00000026918 | 2696.716   | -0.425 | 0.125 | -3.387 | 7.1E-04 | 0.00287509 | Brd3     |
| ENSMUSG00000020137 | 515.293    | -0.426 | 0.161 | -2.645 | 8.2E-03 | 0.02619121 | Thap2    |
| ENSMUSG00000033047 | 7960.201   | -0.427 | 0.073 | -5.882 | 4.1E-09 | 3.3825E-08 | Eif31    |
| ENSMUSG00000022982 | 22126.835  | -0.427 | 0.110 | -3.889 | 1.0E-04 | 0.00047646 | Sod1     |
| ENSMUSG00000041939 | 1518.798   | -0.427 | 0.127 | -3.374 | 7.4E-04 | 0.00300817 | Mvk      |
| ENSMUSG00000037119 | 2637.972   | -0.427 | 0.103 | -4.134 | 3.6E-05 | 0.00018123 | Fam91a1  |
| ENSMUSG00000003380 | 7886.409   | -0.427 | 0.069 | -6.172 | 6.8E-10 | 6.0429E-09 | Rabac1   |
| ENSMUSG00000111515 | 269.000    | -0.427 | 0.145 | -2.940 | 3.3E-03 | 0.01172989 | Gm5055   |
| ENSMUSG00000052459 | 43067.603  | -0.427 | 0.075 | -5.730 | 1.0E-08 | 7.998E-08  | Atp6v1a  |

|                    |           |        |       |        |         |            |           |
|--------------------|-----------|--------|-------|--------|---------|------------|-----------|
| ENSMUSG00000025358 | 1946.541  | -0.427 | 0.121 | -3.520 | 4.3E-04 | 0.00183472 | Cdk2      |
| ENSMUSG00000021681 | 2574.895  | -0.427 | 0.120 | -3.575 | 3.5E-04 | 0.0015126  | Aggf1     |
| ENSMUSG00000042380 | 2583.109  | -0.427 | 0.117 | -3.653 | 2.6E-04 | 0.00114755 | Smim12    |
| ENSMUSG00000043987 | 562.084   | -0.428 | 0.175 | -2.441 | 1.5E-02 | 0.04378866 | Cep164    |
| ENSMUSG00000062382 | 7587.854  | -0.428 | 0.084 | -5.118 | 3.1E-07 | 2.0677E-06 | Ftl1-ps1  |
| ENSMUSG00000089764 | 431.402   | -0.428 | 0.159 | -2.695 | 7.0E-03 | 0.02303146 | Gm16580   |
| ENSMUSG00000025068 | 2902.766  | -0.429 | 0.111 | -3.864 | 1.1E-04 | 0.00052468 | Gsto1     |
| ENSMUSG00000070002 | 1793.215  | -0.429 | 0.179 | -2.390 | 1.7E-02 | 0.04951265 | Ell       |
| ENSMUSG00000025786 | 3891.044  | -0.429 | 0.089 | -4.845 | 1.3E-06 | 7.8926E-06 | Zdhhc3    |
| ENSMUSG00000008140 | 7957.139  | -0.429 | 0.059 | -7.297 | 2.9E-13 | 3.4766E-12 | Emc10     |
| ENSMUSG00000022545 | 734.208   | -0.429 | 0.161 | -2.657 | 7.9E-03 | 0.02543538 | Erec4     |
| ENSMUSG00000031059 | 3089.044  | -0.429 | 0.105 | -4.094 | 4.2E-05 | 0.00021319 | Ndufb11   |
| ENSMUSG00000032399 | 34891.807 | -0.430 | 0.055 | -7.740 | 9.9E-15 | 1.2843E-13 | Rpl4      |
| ENSMUSG00000022013 | 4373.811  | -0.430 | 0.080 | -5.360 | 8.3E-08 | 5.9902E-07 | Dnajc15   |
| ENSMUSG00000045362 | 3616.046  | -0.430 | 0.164 | -2.629 | 8.6E-03 | 0.02736615 | Tnfrsf26  |
| ENSMUSG00000024370 | 1375.183  | -0.430 | 0.124 | -3.478 | 5.1E-04 | 0.00211696 | Cdc23     |
| ENSMUSG00000019088 | 4004.822  | -0.431 | 0.082 | -5.233 | 1.7E-07 | 1.1589E-06 | Dnase111  |
| ENSMUSG00000044881 | 1257.564  | -0.431 | 0.157 | -2.747 | 6.0E-03 | 0.02005974 | Coa4      |
| ENSMUSG00000040618 | 1617.753  | -0.432 | 0.166 | -2.599 | 9.3E-03 | 0.02943958 | Pck2      |
| ENSMUSG00000024885 | 6880.631  | -0.432 | 0.091 | -4.741 | 2.1E-06 | 1.2897E-05 | Aldh3b1   |
| ENSMUSG00000040446 | 469.958   | -0.432 | 0.139 | -3.109 | 1.9E-03 | 0.00705676 | Rprd1a    |
| ENSMUSG00000064138 | 1641.569  | -0.433 | 0.109 | -3.980 | 6.9E-05 | 0.00033604 | Fam172a   |
| ENSMUSG00000024095 | 2519.111  | -0.433 | 0.140 | -3.102 | 1.9E-03 | 0.00722045 | Hnrnp11   |
| ENSMUSG00000030265 | 3974.260  | -0.433 | 0.112 | -3.856 | 1.2E-04 | 0.00054035 | Kras      |
| ENSMUSG00000056167 | 1430.342  | -0.433 | 0.117 | -3.693 | 2.2E-04 | 0.0009931  | Cnot10    |
| ENSMUSG00000032615 | 962.132   | -0.434 | 0.154 | -2.816 | 4.9E-03 | 0.01664889 | Nt5m      |
| ENSMUSG00000079036 | 1111.656  | -0.434 | 0.165 | -2.628 | 8.6E-03 | 0.02739737 | Alkbh1    |
| ENSMUSG00000030064 | 2938.567  | -0.435 | 0.153 | -2.836 | 4.6E-03 | 0.015745   | Frm4b     |
| ENSMUSG00000010048 | 621.757   | -0.435 | 0.152 | -2.857 | 4.3E-03 | 0.01484168 | Ifrd2     |
| ENSMUSG00000038644 | 1568.921  | -0.435 | 0.159 | -2.732 | 6.3E-03 | 0.02091642 | Pold1     |
| ENSMUSG00000009995 | 3100.687  | -0.436 | 0.104 | -4.198 | 2.7E-05 | 0.0001391  | Taz       |
| ENSMUSG00000004567 | 3861.329  | -0.436 | 0.102 | -4.288 | 1.8E-05 | 9.6216E-05 | Mcoln1    |
| ENSMUSG00000004099 | 4042.649  | -0.436 | 0.088 | -4.938 | 7.9E-07 | 5.0242E-06 | Dnmt1     |
| ENSMUSG00000053289 | 1318.424  | -0.437 | 0.148 | -2.945 | 3.2E-03 | 0.01153629 | Ddx10     |
| ENSMUSG00000034101 | 351.751   | -0.437 | 0.177 | -2.474 | 1.3E-02 | 0.04036896 | Ctnd1     |
| ENSMUSG00000059796 | 26268.325 | -0.437 | 0.085 | -5.120 | 3.1E-07 | 2.0552E-06 | Eif4a1    |
| ENSMUSG00000066585 | 2324.303  | -0.438 | 0.101 | -4.316 | 1.6E-05 | 8.5287E-05 | Cdt1      |
| ENSMUSG00000026000 | 1092.974  | -0.438 | 0.131 | -3.356 | 7.9E-04 | 0.0032009  | Lancl1    |
| ENSMUSG00000036678 | 1557.010  | -0.439 | 0.137 | -3.211 | 1.3E-03 | 0.0051239  | Aaas      |
| ENSMUSG00000020029 | 2640.868  | -0.439 | 0.120 | -3.674 | 2.4E-04 | 0.00106679 | Nudt4     |
| ENSMUSG00000007603 | 1290.048  | -0.439 | 0.136 | -3.228 | 1.2E-03 | 0.00485715 | Dus31     |
| ENSMUSG00000057696 | 285.423   | -0.439 | 0.173 | -2.545 | 1.1E-02 | 0.03386105 | Rpl30-ps1 |
| ENSMUSG00000001018 | 3206.000  | -0.440 | 0.110 | -4.008 | 6.1E-05 | 0.00030233 | Snapin    |
| ENSMUSG00000030057 | 19026.292 | -0.440 | 0.077 | -5.703 | 1.2E-08 | 9.3377E-08 | Cnbp      |
| ENSMUSG00000051518 | 2812.550  | -0.440 | 0.091 | -4.821 | 1.4E-06 | 8.8348E-06 | Rps19bp1  |
| ENSMUSG00000031667 | 1435.088  | -0.440 | 0.160 | -2.744 | 6.1E-03 | 0.02022438 | Aktip     |
| ENSMUSG00000003531 | 1530.083  | -0.440 | 0.136 | -3.237 | 1.2E-03 | 0.00472417 | Dgcr6     |
| ENSMUSG00000024276 | 1640.856  | -0.441 | 0.134 | -3.281 | 1.0E-03 | 0.00409004 | Zfp397    |
| ENSMUSG00000039660 | 700.484   | -0.441 | 0.147 | -2.990 | 2.8E-03 | 0.01012886 | Spout1    |
| ENSMUSG00000046707 | 1283.896  | -0.441 | 0.169 | -2.604 | 9.2E-03 | 0.02908822 | Csnk2a2   |
| ENSMUSG00000038605 | 431.455   | -0.441 | 0.175 | -2.518 | 1.2E-02 | 0.03624194 | Samd10    |
| ENSMUSG00000022682 | 2910.470  | -0.441 | 0.123 | -3.597 | 3.2E-04 | 0.00140352 | Rrn3      |

|                    |           |        |       |        |         |            |           |
|--------------------|-----------|--------|-------|--------|---------|------------|-----------|
| ENSMUSG00000041096 | 680.889   | -0.441 | 0.158 | -2.786 | 5.3E-03 | 0.01808141 | Tspyl2    |
| ENSMUSG00000031917 | 2855.160  | -0.441 | 0.102 | -4.313 | 1.6E-05 | 8.6282E-05 | Nip7      |
| ENSMUSG00000053333 | 699.180   | -0.442 | 0.164 | -2.700 | 6.9E-03 | 0.02275727 | Dis312    |
| ENSMUSG00000033059 | 2515.088  | -0.442 | 0.127 | -3.495 | 4.7E-04 | 0.00199715 | Pygb      |
| ENSMUSG00000028207 | 6040.666  | -0.442 | 0.127 | -3.494 | 4.8E-04 | 0.00200543 | Asph      |
| ENSMUSG00000018398 | 1629.376  | -0.443 | 0.095 | -4.649 | 3.3E-06 | 1.9748E-05 | Septin8   |
| ENSMUSG00000041420 | 1089.899  | -0.443 | 0.152 | -2.911 | 3.6E-03 | 0.01271299 | Meis3     |
| ENSMUSG00000005078 | 2072.221  | -0.443 | 0.103 | -4.289 | 1.8E-05 | 9.5505E-05 | Jkamp     |
| ENSMUSG00000083219 | 343.145   | -0.443 | 0.170 | -2.601 | 9.3E-03 | 0.02930147 | Gm11410   |
| ENSMUSG00000055660 | 762.003   | -0.443 | 0.142 | -3.111 | 1.9E-03 | 0.00702473 | Mettl4    |
| ENSMUSG00000026213 | 904.068   | -0.444 | 0.159 | -2.784 | 5.4E-03 | 0.01816995 | Stk11ip   |
| ENSMUSG00000058542 | 1481.988  | -0.444 | 0.130 | -3.411 | 6.5E-04 | 0.00265536 | Gm15590   |
| ENSMUSG00000032366 | 13473.673 | -0.444 | 0.096 | -4.637 | 3.5E-06 | 2.082E-05  | Tpm1      |
| ENSMUSG00000043683 | 1115.048  | -0.444 | 0.170 | -2.618 | 8.8E-03 | 0.0281286  | Fem1a     |
| ENSMUSG00000048307 | 1623.531  | -0.444 | 0.152 | -2.928 | 3.4E-03 | 0.01211551 | Ankrd46   |
| ENSMUSG00000029234 | 10823.469 | -0.444 | 0.067 | -6.607 | 3.9E-11 | 3.8815E-10 | Tmem165   |
| ENSMUSG00000027710 | 1146.655  | -0.445 | 0.174 | -2.553 | 1.1E-02 | 0.03316955 | Acad9     |
| ENSMUSG00000002718 | 2088.753  | -0.446 | 0.114 | -3.902 | 9.5E-05 | 0.00045359 | Cse11     |
| ENSMUSG00000068290 | 4319.550  | -0.446 | 0.097 | -4.605 | 4.1E-06 | 2.4149E-05 | Ddrgk1    |
| ENSMUSG00000029647 | 2037.458  | -0.446 | 0.107 | -4.156 | 3.2E-05 | 0.00016555 | Pan3      |
| ENSMUSG00000056076 | 15544.206 | -0.446 | 0.079 | -5.648 | 1.6E-08 | 1.2664E-07 | Eif3b     |
| ENSMUSG00000117345 | 313.396   | -0.446 | 0.154 | -2.903 | 3.7E-03 | 0.01300392 | Gm7926    |
| ENSMUSG00000109324 | 4244.204  | -0.446 | 0.083 | -5.407 | 6.4E-08 | 4.6959E-07 | Prmt1     |
| ENSMUSG00000019158 | 9230.570  | -0.447 | 0.126 | -3.539 | 4.0E-04 | 0.00171528 | Tmem160   |
| ENSMUSG00000111356 | 866.310   | -0.447 | 0.109 | -4.096 | 4.2E-05 | 0.00021169 | Rpl321    |
| ENSMUSG00000030888 | 1526.584  | -0.447 | 0.123 | -3.633 | 2.8E-04 | 0.00123538 | Rrp8      |
| ENSMUSG00000033964 | 421.852   | -0.447 | 0.170 | -2.634 | 8.4E-03 | 0.02699744 | Zbtb41    |
| ENSMUSG00000036199 | 7695.657  | -0.447 | 0.112 | -3.997 | 6.4E-05 | 0.00031513 | Ndufa13   |
| ENSMUSG00000021027 | 646.583   | -0.447 | 0.166 | -2.688 | 7.2E-03 | 0.02348291 | Ralgapa1  |
| ENSMUSG00000051329 | 852.583   | -0.448 | 0.151 | -2.972 | 3.0E-03 | 0.01066934 | Nup160    |
| ENSMUSG00000029627 | 469.206   | -0.449 | 0.187 | -2.402 | 1.6E-02 | 0.04811476 | Zkscan14  |
| ENSMUSG00000020605 | 1089.575  | -0.449 | 0.140 | -3.209 | 1.3E-03 | 0.00516227 | Hs1bp3    |
| ENSMUSG00000024197 | 5597.967  | -0.449 | 0.095 | -4.706 | 2.5E-06 | 1.5207E-05 | Plin3     |
| ENSMUSG00000022414 | 1436.281  | -0.449 | 0.169 | -2.661 | 7.8E-03 | 0.02512591 | Tab1      |
| ENSMUSG00000040345 | 4394.148  | -0.449 | 0.099 | -4.537 | 5.7E-06 | 3.2649E-05 | Arhgap9   |
| ENSMUSG00000067344 | 298.795   | -0.450 | 0.147 | -3.053 | 2.3E-03 | 0.00838261 | Rps25-ps1 |
| ENSMUSG00000061455 | 1024.829  | -0.450 | 0.154 | -2.929 | 3.4E-03 | 0.01208766 | Stx17     |
| ENSMUSG00000020496 | 9584.647  | -0.450 | 0.080 | -5.657 | 1.5E-08 | 1.2009E-07 | Rnfl187   |
| ENSMUSG00000028247 | 939.706   | -0.450 | 0.143 | -3.137 | 1.7E-03 | 0.00647741 | Coq3      |
| ENSMUSG00000024012 | 8967.676  | -0.451 | 0.083 | -5.433 | 5.6E-08 | 4.0885E-07 | Mtch1     |
| ENSMUSG00000034566 | 5301.389  | -0.451 | 0.112 | -4.027 | 5.6E-05 | 0.00027923 | Atp5h     |
| ENSMUSG00000062328 | 2698.351  | -0.451 | 0.171 | -2.628 | 8.6E-03 | 0.02737004 | Rpl17     |
| ENSMUSG00000052085 | 3902.433  | -0.452 | 0.135 | -3.341 | 8.3E-04 | 0.00335917 | Dock8     |
| ENSMUSG00000013878 | 256.725   | -0.452 | 0.188 | -2.409 | 1.6E-02 | 0.04730436 | Rnfl170   |
| ENSMUSG00000002984 | 5036.464  | -0.453 | 0.084 | -5.404 | 6.5E-08 | 4.7594E-07 | Tomm40    |
| ENSMUSG00000022433 | 1600.816  | -0.453 | 0.139 | -3.255 | 1.1E-03 | 0.00446259 | Csnk1e    |
| ENSMUSG00000041130 | 1174.713  | -0.453 | 0.165 | -2.744 | 6.1E-03 | 0.02021481 | Zfp598    |
| ENSMUSG00000001119 | 4739.777  | -0.454 | 0.116 | -3.894 | 9.9E-05 | 0.00046747 | Col6a1    |
| ENSMUSG00000009549 | 6596.841  | -0.454 | 0.081 | -5.609 | 2.0E-08 | 1.5767E-07 | Srp14     |
| ENSMUSG00000001576 | 5201.543  | -0.454 | 0.097 | -4.681 | 2.9E-06 | 1.7003E-05 | Ergic1    |
| ENSMUSG00000020982 | 3334.837  | -0.455 | 0.092 | -4.959 | 7.1E-07 | 4.536E-06  | Nemf      |
| ENSMUSG00000019951 | 2861.045  | -0.455 | 0.093 | -4.867 | 1.1E-06 | 7.0795E-06 | Uhrflbp11 |

|                    |           |        |       |        |         |            |               |
|--------------------|-----------|--------|-------|--------|---------|------------|---------------|
| ENSMUSG00000083911 | 304.379   | -0.455 | 0.166 | -2.740 | 6.1E-03 | 0.02044088 | Gm4342        |
| ENSMUSG00000003575 | 785.697   | -0.455 | 0.188 | -2.421 | 1.5E-02 | 0.04590194 | Crtc1         |
| ENSMUSG00000045411 | 739.539   | -0.455 | 0.181 | -2.512 | 1.2E-02 | 0.03674045 | 2410002F23Rik |
| ENSMUSG00000047260 | 3678.925  | -0.456 | 0.105 | -4.354 | 1.3E-05 | 7.2767E-05 | Emc6          |
| ENSMUSG00000041360 | 3505.268  | -0.456 | 0.120 | -3.785 | 1.5E-04 | 0.00070827 | Pum3          |
| ENSMUSG00000071014 | 1886.139  | -0.456 | 0.145 | -3.134 | 1.7E-03 | 0.00653322 | Ndufb6        |
| ENSMUSG00000001376 | 1617.285  | -0.456 | 0.156 | -2.924 | 3.5E-03 | 0.01227293 | Vps50         |
| ENSMUSG00000033728 | 2417.413  | -0.457 | 0.104 | -4.378 | 1.2E-05 | 6.5587E-05 | Lrrc14        |
| ENSMUSG00000030284 | 1245.298  | -0.457 | 0.169 | -2.709 | 6.8E-03 | 0.02224973 | Creld1        |
| ENSMUSG00000002625 | 1657.745  | -0.457 | 0.156 | -2.931 | 3.4E-03 | 0.01201984 | Akap81        |
| ENSMUSG00000078572 | 2028.887  | -0.457 | 0.145 | -3.164 | 1.6E-03 | 0.00595738 | Ndufaf8       |
| ENSMUSG00000039176 | 2225.797  | -0.458 | 0.147 | -3.111 | 1.9E-03 | 0.00701752 | Polg          |
| ENSMUSG00000031392 | 2836.221  | -0.459 | 0.105 | -4.357 | 1.3E-05 | 7.1789E-05 | Irak1         |
| ENSMUSG00000027957 | 1193.769  | -0.459 | 0.124 | -3.709 | 2.1E-04 | 0.00093799 | Slc35a3       |
| ENSMUSG00000084106 | 725.049   | -0.459 | 0.125 | -3.676 | 2.4E-04 | 0.00105756 | Gm6136        |
| ENSMUSG00000039000 | 1447.812  | -0.459 | 0.168 | -2.729 | 6.4E-03 | 0.02108642 | Ube3c         |
| ENSMUSG00000020372 | 21130.145 | -0.459 | 0.073 | -6.259 | 3.9E-10 | 3.5439E-09 | Rack1         |
| ENSMUSG00000024270 | 2230.147  | -0.459 | 0.099 | -4.641 | 3.5E-06 | 2.0458E-05 | Slc39a6       |
| ENSMUSG00000021068 | 2242.178  | -0.459 | 0.130 | -3.542 | 4.0E-04 | 0.00170006 | Nin           |
| ENSMUSG00000051579 | 1714.338  | -0.459 | 0.126 | -3.655 | 2.6E-04 | 0.00113935 | Tceal8        |
| ENSMUSG00000021595 | 4827.845  | -0.460 | 0.104 | -4.423 | 9.7E-06 | 5.385E-05  | Nsun2         |
| ENSMUSG00000036160 | 2836.389  | -0.460 | 0.134 | -3.439 | 5.8E-04 | 0.00241524 | Surf6         |
| ENSMUSG00000026895 | 4953.927  | -0.460 | 0.086 | -5.326 | 1.0E-07 | 7.1788E-07 | Ndufa8        |
| ENSMUSG00000028431 | 1422.744  | -0.460 | 0.138 | -3.337 | 8.5E-04 | 0.00339812 | Elp1          |
| ENSMUSG00000062458 | 200.032   | -0.461 | 0.169 | -2.724 | 6.5E-03 | 0.02136185 | Gm8623        |
| ENSMUSG00000016541 | 4876.998  | -0.461 | 0.079 | -5.811 | 6.2E-09 | 5.0617E-08 | Atxn10        |
| ENSMUSG00000022350 | 3590.207  | -0.461 | 0.100 | -4.626 | 3.7E-06 | 2.1927E-05 | Washc5        |
| ENSMUSG00000001025 | 8219.624  | -0.461 | 0.142 | -3.257 | 1.1E-03 | 0.00443682 | S100a6        |
| ENSMUSG00000057531 | 8144.348  | -0.461 | 0.091 | -5.062 | 4.2E-07 | 2.7305E-06 | Dtnbp1        |
| ENSMUSG00000071573 | 395.804   | -0.462 | 0.187 | -2.476 | 1.3E-02 | 0.0401923  | Rnls          |
| ENSMUSG00000009030 | 2005.581  | -0.462 | 0.104 | -4.438 | 9.1E-06 | 5.0545E-05 | Pdcl          |
| ENSMUSG00000057278 | 1809.177  | -0.463 | 0.136 | -3.400 | 6.7E-04 | 0.00275875 | Snrpg         |
| ENSMUSG00000024831 | 642.249   | -0.463 | 0.177 | -2.616 | 8.9E-03 | 0.0282758  | Ighmbp2       |
| ENSMUSG00000028568 | 943.158   | -0.463 | 0.110 | -4.205 | 2.6E-05 | 0.00013541 | Btf314        |
| ENSMUSG00000031015 | 4179.353  | -0.464 | 0.095 | -4.878 | 1.1E-06 | 6.717E-06  | Swap70        |
| ENSMUSG00000059291 | 4330.847  | -0.464 | 0.096 | -4.830 | 1.4E-06 | 8.4428E-06 | Rpl11         |
| ENSMUSG00000020766 | 5015.787  | -0.464 | 0.089 | -5.237 | 1.6E-07 | 1.1346E-06 | Galk1         |
| ENSMUSG00000032342 | 1071.771  | -0.465 | 0.154 | -3.010 | 2.6E-03 | 0.00952211 | Mto1          |
| ENSMUSG00000070572 | 227.098   | -0.465 | 0.178 | -2.612 | 9.0E-03 | 0.0285093  | Trmt112-ps2   |
| ENSMUSG00000021497 | 2721.738  | -0.465 | 0.082 | -5.661 | 1.5E-08 | 1.1766E-07 | Txndc15       |
| ENSMUSG00000052533 | 1054.275  | -0.465 | 0.169 | -2.760 | 5.8E-03 | 0.01940078 | Nup188        |
| ENSMUSG00000091845 | 316.105   | -0.466 | 0.160 | -2.918 | 3.5E-03 | 0.01245579 | Rpl36-ps12    |
| ENSMUSG00000041747 | 1802.679  | -0.466 | 0.136 | -3.415 | 6.4E-04 | 0.00262331 | Utp15         |
| ENSMUSG00000034211 | 3173.669  | -0.466 | 0.097 | -4.813 | 1.5E-06 | 9.1596E-06 | Mrps17        |
| ENSMUSG00000014633 | 443.507   | -0.466 | 0.184 | -2.535 | 1.1E-02 | 0.03469652 | Cmc2          |
| ENSMUSG00000097431 | 427.202   | -0.466 | 0.160 | -2.922 | 3.5E-03 | 0.01231433 | Gm26782       |
| ENSMUSG00000034216 | 3312.624  | -0.466 | 0.085 | -5.462 | 4.7E-08 | 3.4963E-07 | Vps18         |
| ENSMUSG00000060019 | 336.387   | -0.467 | 0.163 | -2.869 | 4.1E-03 | 0.01431466 | Gm10073       |
| ENSMUSG00000005150 | 961.983   | -0.467 | 0.135 | -3.461 | 5.4E-04 | 0.0022429  | Wdr83         |
| ENSMUSG00000094344 | 278.171   | -0.467 | 0.152 | -3.074 | 2.1E-03 | 0.00785827 | Gm11942       |
| ENSMUSG00000020097 | 19288.206 | -0.467 | 0.092 | -5.055 | 4.3E-07 | 2.8273E-06 | Sgpl1         |
| ENSMUSG00000025439 | 3663.638  | -0.467 | 0.098 | -4.746 | 2.1E-06 | 1.261E-05  | Clns1a        |



|                    |           |        |       |        |         |            |               |
|--------------------|-----------|--------|-------|--------|---------|------------|---------------|
| ENSMUSG00000019975 | 1620.638  | -0.467 | 0.124 | -3.757 | 1.7E-04 | 0.00078753 | Ikbip         |
| ENSMUSG00000032239 | 1830.372  | -0.468 | 0.112 | -4.194 | 2.7E-05 | 0.00014159 | Rp9           |
| ENSMUSG00000086841 | 1000.413  | -0.468 | 0.134 | -3.495 | 4.7E-04 | 0.0019985  | 2410006H16Rik |
| ENSMUSG00000001366 | 1442.269  | -0.469 | 0.156 | -3.011 | 2.6E-03 | 0.00949889 | Fbxo9         |
| ENSMUSG00000024501 | 1577.453  | -0.470 | 0.179 | -2.622 | 8.7E-03 | 0.02780655 | Dpysl3        |
| ENSMUSG00000059064 | 376.803   | -0.470 | 0.174 | -2.699 | 7.0E-03 | 0.02279782 | Gm10059       |
| ENSMUSG00000015478 | 1397.145  | -0.471 | 0.111 | -4.228 | 2.4E-05 | 0.00012356 | Rnf5          |
| ENSMUSG00000034252 | 2276.085  | -0.471 | 0.129 | -3.641 | 2.7E-04 | 0.00119997 | Senp6         |
| ENSMUSG00000064037 | 1914.846  | -0.471 | 0.115 | -4.100 | 4.1E-05 | 0.00020829 | Gpn1          |
| ENSMUSG00000068917 | 1506.878  | -0.471 | 0.145 | -3.246 | 1.2E-03 | 0.00459653 | Clk2          |
| ENSMUSG00000042670 | 864.176   | -0.471 | 0.101 | -4.663 | 3.1E-06 | 1.8486E-05 | Immp11        |
| ENSMUSG00000038733 | 5542.536  | -0.471 | 0.078 | -6.053 | 1.4E-09 | 1.2316E-08 | Wdr26         |
| ENSMUSG00000022503 | 1439.892  | -0.471 | 0.138 | -3.406 | 6.6E-04 | 0.00269989 | Nubp1         |
| ENSMUSG00000038811 | 5734.387  | -0.472 | 0.150 | -3.142 | 1.7E-03 | 0.00638216 | Gngt2         |
| ENSMUSG00000060143 | 1456.167  | -0.472 | 0.126 | -3.749 | 1.8E-04 | 0.00080914 | Gm10076       |
| ENSMUSG00000067274 | 42563.057 | -0.472 | 0.068 | -6.902 | 5.1E-12 | 5.4356E-11 | Rplp0         |
| ENSMUSG00000045374 | 1649.772  | -0.472 | 0.188 | -2.516 | 1.2E-02 | 0.03643952 | Wdr81         |
| ENSMUSG00000061666 | 1968.424  | -0.472 | 0.135 | -3.499 | 4.7E-04 | 0.00197083 | Gdpd1         |
| ENSMUSG00000040521 | 1426.180  | -0.472 | 0.130 | -3.628 | 2.9E-04 | 0.0012571  | Tsfm          |
| ENSMUSG00000025377 | 1054.726  | -0.472 | 0.119 | -3.986 | 6.7E-05 | 0.00032877 | Tepsin        |
| ENSMUSG00000035781 | 3942.562  | -0.473 | 0.093 | -5.081 | 3.8E-07 | 2.4881E-06 | R3hdm4        |
| ENSMUSG00000033016 | 3316.238  | -0.473 | 0.107 | -4.416 | 1.0E-05 | 5.5698E-05 | Nfate1        |
| ENSMUSG00000031360 | 2945.523  | -0.473 | 0.100 | -4.716 | 2.4E-06 | 1.4473E-05 | Ctps2         |
| ENSMUSG00000025817 | 1807.065  | -0.474 | 0.100 | -4.718 | 2.4E-06 | 1.4323E-05 | Nudt5         |
| ENSMUSG00000049489 | 1063.235  | -0.474 | 0.152 | -3.124 | 1.8E-03 | 0.00674269 | Ccnq          |
| ENSMUSG00000033721 | 3689.369  | -0.476 | 0.108 | -4.397 | 1.1E-05 | 6.0341E-05 | Vav3          |
| ENSMUSG00000023988 | 1622.621  | -0.476 | 0.157 | -3.028 | 2.5E-03 | 0.00902078 | Bysl          |
| ENSMUSG00000050890 | 805.516   | -0.477 | 0.163 | -2.917 | 3.5E-03 | 0.01248734 | Pdik11        |
| ENSMUSG00000029547 | 994.284   | -0.477 | 0.164 | -2.904 | 3.7E-03 | 0.01297621 | Ints1         |
| ENSMUSG00000020736 | 3742.655  | -0.477 | 0.085 | -5.643 | 1.7E-08 | 1.2997E-07 | Nt5c          |
| ENSMUSG0000004264  | 7559.861  | -0.477 | 0.083 | -5.728 | 1.0E-08 | 8.1205E-08 | Phb2          |
| ENSMUSG00000022299 | 769.989   | -0.477 | 0.181 | -2.632 | 8.5E-03 | 0.02716793 | Slc25a32      |
| ENSMUSG00000027582 | 1044.539  | -0.478 | 0.173 | -2.770 | 5.6E-03 | 0.01886942 | Zgpat         |
| ENSMUSG00000049606 | 915.057   | -0.478 | 0.150 | -3.186 | 1.4E-03 | 0.00555503 | Zfp644        |
| ENSMUSG00000018774 | 75927.079 | -0.478 | 0.083 | -5.777 | 7.6E-09 | 6.1292E-08 | Cd68          |
| ENSMUSG00000003190 | 298.079   | -0.478 | 0.171 | -2.796 | 5.2E-03 | 0.01759641 | Bcl2l12       |
| ENSMUSG00000031812 | 10909.865 | -0.478 | 0.091 | -5.285 | 1.3E-07 | 8.8679E-07 | Map11c3b      |
| ENSMUSG00000027752 | 1361.646  | -0.479 | 0.111 | -4.315 | 1.6E-05 | 8.5859E-05 | Exosc8        |
| ENSMUSG00000078622 | 2359.767  | -0.479 | 0.112 | -4.259 | 2.1E-05 | 0.00010835 | Ccdc47        |
| ENSMUSG00000025967 | 7263.856  | -0.479 | 0.092 | -5.231 | 1.7E-07 | 1.1692E-06 | Eef1b2        |
| ENSMUSG00000044533 | 34861.817 | -0.479 | 0.082 | -5.876 | 4.2E-09 | 3.4923E-08 | Rps2          |
| ENSMUSG00000091625 | 397.240   | -0.479 | 0.172 | -2.780 | 5.4E-03 | 0.01841089 | Lsm5          |
| ENSMUSG00000086316 | 483.289   | -0.479 | 0.166 | -2.883 | 3.9E-03 | 0.01377606 | Nbdy          |
| ENSMUSG00000022718 | 658.207   | -0.480 | 0.158 | -3.033 | 2.4E-03 | 0.00887552 | Dgcr8         |
| ENSMUSG00000022992 | 1519.787  | -0.480 | 0.155 | -3.096 | 2.0E-03 | 0.00735252 | Kansl2        |
| ENSMUSG00000024205 | 371.692   | -0.481 | 0.140 | -3.439 | 5.8E-04 | 0.00241974 | Rpl36-ps2     |
| ENSMUSG00000005370 | 553.465   | -0.481 | 0.167 | -2.880 | 4.0E-03 | 0.01389939 | Msh6          |
| ENSMUSG00000016344 | 2688.499  | -0.481 | 0.104 | -4.639 | 3.5E-06 | 2.0709E-05 | Pdpdf         |
| ENSMUSG00000005514 | 34880.867 | -0.481 | 0.086 | -5.609 | 2.0E-08 | 1.5747E-07 | Por           |
| ENSMUSG00000040274 | 6796.320  | -0.482 | 0.114 | -4.216 | 2.5E-05 | 0.00012953 | Cdk6          |
| ENSMUSG00000099764 | 746.091   | -0.482 | 0.149 | -3.229 | 1.2E-03 | 0.00483278 | Rps10-ps2     |
| ENSMUSG00000053329 | 899.547   | -0.482 | 0.172 | -2.798 | 5.1E-03 | 0.01751394 | Gatd3a        |

|                    |            |        |       |        |         |            |            |
|--------------------|------------|--------|-------|--------|---------|------------|------------|
| ENSMUSG00000059534 | 6338.624   | -0.482 | 0.135 | -3.563 | 3.7E-04 | 0.00157906 | Uqcr10     |
| ENSMUSG00000061244 | 2751.654   | -0.482 | 0.115 | -4.195 | 2.7E-05 | 0.00014081 | Exoc5      |
| ENSMUSG00000003746 | 4843.758   | -0.482 | 0.130 | -3.714 | 2.0E-04 | 0.00091992 | Man1a      |
| ENSMUSG00000022556 | 2328.733   | -0.482 | 0.104 | -4.642 | 3.5E-06 | 2.0406E-05 | Hsf1       |
| ENSMUSG00000022978 | 902.974    | -0.482 | 0.149 | -3.234 | 1.2E-03 | 0.00476423 | Mis18a     |
| ENSMUSG00000037013 | 3054.419   | -0.483 | 0.121 | -3.975 | 7.0E-05 | 0.00034287 | Ss18       |
| ENSMUSG00000030047 | 4155.395   | -0.483 | 0.137 | -3.519 | 4.3E-04 | 0.00183485 | Arhgap25   |
| ENSMUSG00000028974 | 936.582    | -0.483 | 0.137 | -3.515 | 4.4E-04 | 0.00186145 | Dffa       |
| ENSMUSG00000035704 | 1362.969   | -0.483 | 0.141 | -3.418 | 6.3E-04 | 0.00259219 | Alg8       |
| ENSMUSG00000019738 | 893.016    | -0.483 | 0.149 | -3.242 | 1.2E-03 | 0.00465119 | Polr2i     |
| ENSMUSG00000028614 | 1181.400   | -0.483 | 0.153 | -3.157 | 1.6E-03 | 0.00607265 | Ndc1       |
| ENSMUSG00000039599 | 616.143    | -0.484 | 0.147 | -3.288 | 1.0E-03 | 0.00399282 | Fam149b    |
| ENSMUSG00000024038 | 4099.189   | -0.484 | 0.121 | -4.013 | 6.0E-05 | 0.00029564 | Ndufv3     |
| ENSMUSG00000058444 | 1319.184   | -0.484 | 0.136 | -3.547 | 3.9E-04 | 0.00166848 | Map2k5     |
| ENSMUSG00000031633 | 9468.259   | -0.484 | 0.067 | -7.224 | 5.1E-13 | 5.8451E-12 | Slc25a4    |
| ENSMUSG00000015027 | 1957.900   | -0.484 | 0.136 | -3.570 | 3.6E-04 | 0.00153885 | Galns      |
| ENSMUSG00000036615 | 1362.823   | -0.484 | 0.123 | -3.950 | 7.8E-05 | 0.00037784 | Rfxap      |
| ENSMUSG00000049103 | 5049.022   | -0.485 | 0.196 | -2.471 | 1.3E-02 | 0.0405999  | Ccr2       |
| ENSMUSG00000027285 | 674.200    | -0.485 | 0.188 | -2.574 | 1.0E-02 | 0.03135898 | Haus2      |
| ENSMUSG00000056820 | 2834.480   | -0.485 | 0.083 | -5.837 | 5.3E-09 | 4.366E-08  | Tsnax      |
| ENSMUSG00000117810 | 244.855    | -0.485 | 0.154 | -3.139 | 1.7E-03 | 0.00642695 | Gm8934     |
| ENSMUSG00000029304 | 153574.151 | -0.485 | 0.141 | -3.431 | 6.0E-04 | 0.00248536 | Spp1       |
| ENSMUSG00000015013 | 3311.368   | -0.485 | 0.097 | -4.986 | 6.2E-07 | 3.9802E-06 | Trappc21   |
| ENSMUSG00000075232 | 696.081    | -0.485 | 0.144 | -3.362 | 7.7E-04 | 0.00312934 | Amd1       |
| ENSMUSG00000074182 | 731.372    | -0.485 | 0.179 | -2.711 | 6.7E-03 | 0.02209623 | Znhit6     |
| ENSMUSG00000067369 | 569.093    | -0.486 | 0.173 | -2.810 | 4.9E-03 | 0.0169261  | Trmt2b     |
| ENSMUSG00000020070 | 454.558    | -0.486 | 0.198 | -2.454 | 1.4E-02 | 0.04238623 | Rufy2      |
| ENSMUSG00000032177 | 706.791    | -0.487 | 0.176 | -2.764 | 5.7E-03 | 0.0191578  | Pde4a      |
| ENSMUSG00000027381 | 6296.152   | -0.487 | 0.128 | -3.802 | 1.4E-04 | 0.00066628 | Bcl2l11    |
| ENSMUSG00000026014 | 1050.061   | -0.487 | 0.158 | -3.085 | 2.0E-03 | 0.00759023 | Raph1      |
| ENSMUSG00000058239 | 361.615    | -0.487 | 0.196 | -2.491 | 1.3E-02 | 0.03870062 | Usf2       |
| ENSMUSG00000019362 | 7179.731   | -0.488 | 0.094 | -5.176 | 2.3E-07 | 1.5514E-06 | D8Ertd738e |
| ENSMUSG00000005846 | 4413.964   | -0.488 | 0.097 | -5.005 | 5.6E-07 | 3.623E-06  | Rsl1d1     |
| ENSMUSG00000020380 | 906.374    | -0.488 | 0.163 | -2.996 | 2.7E-03 | 0.00994509 | Rad50      |
| ENSMUSG00000021693 | 946.365    | -0.488 | 0.175 | -2.790 | 5.3E-03 | 0.01787486 | Kif2a      |
| ENSMUSG00000010936 | 5320.592   | -0.488 | 0.092 | -5.274 | 1.3E-07 | 9.4137E-07 | Vac14      |
| ENSMUSG00000032740 | 2621.651   | -0.488 | 0.098 | -5.002 | 5.7E-07 | 3.6769E-06 | Ccdc88a    |
| ENSMUSG00000039208 | 21240.382  | -0.488 | 0.097 | -5.036 | 4.7E-07 | 3.099E-06  | Metrn1     |
| ENSMUSG00000029030 | 7890.813   | -0.488 | 0.085 | -5.741 | 9.4E-09 | 7.529E-08  | Tprgl      |
| ENSMUSG00000062006 | 8140.057   | -0.488 | 0.149 | -3.279 | 1.0E-03 | 0.00412574 | Rpl34      |
| ENSMUSG00000026317 | 7800.006   | -0.488 | 0.091 | -5.360 | 8.3E-08 | 6.004E-07  | Cln8       |
| ENSMUSG00000031683 | 1844.844   | -0.489 | 0.125 | -3.900 | 9.6E-05 | 0.00045813 | Lsm6       |
| ENSMUSG00000090935 | 1369.857   | -0.489 | 0.136 | -3.595 | 3.2E-04 | 0.00141152 | Synj2bp    |
| ENSMUSG00000039542 | 1570.731   | -0.489 | 0.146 | -3.355 | 7.9E-04 | 0.00320643 | Ncam1      |
| ENSMUSG00000031904 | 1838.153   | -0.490 | 0.174 | -2.820 | 4.8E-03 | 0.01646891 | Slc7a6     |
| ENSMUSG00000031575 | 2530.576   | -0.490 | 0.131 | -3.743 | 1.8E-04 | 0.00082888 | Ash2l      |
| ENSMUSG00000026568 | 3619.529   | -0.490 | 0.096 | -5.090 | 3.6E-07 | 2.3858E-06 | Mpc2       |
| ENSMUSG00000044080 | 3709.639   | -0.491 | 0.093 | -5.273 | 1.3E-07 | 9.4636E-07 | S100a1     |
| ENSMUSG00000051506 | 1488.749   | -0.491 | 0.137 | -3.594 | 3.3E-04 | 0.00141655 | Wdfy4      |
| ENSMUSG00000037152 | 3988.399   | -0.491 | 0.118 | -4.153 | 3.3E-05 | 0.00016746 | Ndufc1     |
| ENSMUSG00000029478 | 1536.664   | -0.491 | 0.149 | -3.289 | 1.0E-03 | 0.00398576 | Ncor2      |
| ENSMUSG00000029192 | 1623.510   | -0.492 | 0.185 | -2.656 | 7.9E-03 | 0.02547089 | Tbc1d14    |

|                    |           |        |       |        |         |            |            |
|--------------------|-----------|--------|-------|--------|---------|------------|------------|
| ENSMUSG00000058833 | 2957.244  | -0.492 | 0.084 | -5.859 | 4.7E-09 | 3.8579E-08 | Rex1bd     |
| ENSMUSG00000037295 | 5569.494  | -0.492 | 0.096 | -5.133 | 2.9E-07 | 1.9288E-06 | Ldlrap1    |
| ENSMUSG00000032295 | 1561.549  | -0.492 | 0.171 | -2.871 | 4.1E-03 | 0.01423167 | Man2c1     |
| ENSMUSG00000045594 | 6106.033  | -0.492 | 0.091 | -5.398 | 6.7E-08 | 4.9131E-07 | Glb1       |
| ENSMUSG00000060636 | 4422.490  | -0.493 | 0.126 | -3.899 | 9.7E-05 | 0.00045962 | Rpl35a     |
| ENSMUSG00000098234 | 689.775   | -0.493 | 0.138 | -3.562 | 3.7E-04 | 0.00158161 | Snhg6      |
| ENSMUSG00000035629 | 976.886   | -0.493 | 0.151 | -3.273 | 1.1E-03 | 0.00420398 | Rubcn      |
| ENSMUSG00000014294 | 7869.055  | -0.493 | 0.136 | -3.633 | 2.8E-04 | 0.00123413 | Ndufa2     |
| ENSMUSG00000035958 | 746.322   | -0.493 | 0.175 | -2.819 | 4.8E-03 | 0.01652123 | Tdp2       |
| ENSMUSG00000079641 | 1878.778  | -0.493 | 0.171 | -2.882 | 4.0E-03 | 0.01380393 | Rpl39      |
| ENSMUSG00000054648 | 827.947   | -0.493 | 0.163 | -3.035 | 2.4E-03 | 0.00884154 | Zfp869     |
| ENSMUSG00000026082 | 584.920   | -0.493 | 0.194 | -2.538 | 1.1E-02 | 0.03441587 | Rev1       |
| ENSMUSG00000024740 | 8428.324  | -0.494 | 0.103 | -4.803 | 1.6E-06 | 9.6019E-06 | Ddb1       |
| ENSMUSG00000022031 | 924.767   | -0.494 | 0.175 | -2.822 | 4.8E-03 | 0.0163878  | Elp3       |
| ENSMUSG00000020130 | 2347.691  | -0.494 | 0.106 | -4.674 | 3.0E-06 | 1.761E-05  | Tbc1d15    |
| ENSMUSG00000003873 | 9502.687  | -0.495 | 0.082 | -6.035 | 1.6E-09 | 1.3727E-08 | Bax        |
| ENSMUSG00000004462 | 1071.530  | -0.495 | 0.172 | -2.882 | 3.9E-03 | 0.0137925  | Tbccd1     |
| ENSMUSG00000040818 | 1813.721  | -0.495 | 0.162 | -3.056 | 2.2E-03 | 0.00829532 | Dennd6a    |
| ENSMUSG00000042705 | 2550.186  | -0.495 | 0.115 | -4.327 | 1.5E-05 | 8.1413E-05 | Comm10     |
| ENSMUSG00000038279 | 3426.361  | -0.496 | 0.140 | -3.531 | 4.1E-04 | 0.00176522 | Nop2       |
| ENSMUSG00000040105 | 569.528   | -0.496 | 0.184 | -2.700 | 6.9E-03 | 0.02277287 | Plpp6      |
| ENSMUSG00000042271 | 756.170   | -0.496 | 0.146 | -3.395 | 6.9E-04 | 0.00280161 | Nxt2       |
| ENSMUSG00000002326 | 736.382   | -0.497 | 0.123 | -4.040 | 5.3E-05 | 0.00026585 | Gmpr2      |
| ENSMUSG00000048310 | 1082.851  | -0.497 | 0.179 | -2.777 | 5.5E-03 | 0.0185176  | Pskh1      |
| ENSMUSG00000027997 | 1345.240  | -0.497 | 0.147 | -3.393 | 6.9E-04 | 0.00281986 | Casp6      |
| ENSMUSG00000027160 | 558.563   | -0.497 | 0.188 | -2.639 | 8.3E-03 | 0.02663239 | Ccdc34     |
| ENSMUSG00000024271 | 3239.523  | -0.498 | 0.122 | -4.063 | 4.8E-05 | 0.0002422  | Elp2       |
| ENSMUSG00000027108 | 2338.480  | -0.498 | 0.109 | -4.571 | 4.9E-06 | 2.8087E-05 | Ola1       |
| ENSMUSG00000073702 | 2074.692  | -0.498 | 0.132 | -3.776 | 1.6E-04 | 0.00073331 | Rpl31      |
| ENSMUSG00000063802 | 2646.794  | -0.498 | 0.118 | -4.237 | 2.3E-05 | 0.00011909 | Hspbp1     |
| ENSMUSG00000047719 | 1250.297  | -0.498 | 0.134 | -3.709 | 2.1E-04 | 0.00093823 | Ubiad1     |
| ENSMUSG00000011427 | 468.334   | -0.499 | 0.205 | -2.430 | 1.5E-02 | 0.04491036 | Zfp790     |
| ENSMUSG00000028969 | 1598.532  | -0.500 | 0.094 | -5.304 | 1.1E-07 | 8.0573E-07 | Cdk5       |
| ENSMUSG00000024780 | 1611.956  | -0.500 | 0.110 | -4.560 | 5.1E-06 | 2.9519E-05 | Cdc3711    |
| ENSMUSG00000053644 | 1168.679  | -0.500 | 0.183 | -2.740 | 6.1E-03 | 0.02047092 | Aldh7a1    |
| ENSMUSG00000025135 | 5987.716  | -0.500 | 0.093 | -5.408 | 6.4E-08 | 4.6516E-07 | Anapc11    |
| ENSMUSG00000048924 | 1060.327  | -0.501 | 0.209 | -2.397 | 1.7E-02 | 0.04868044 | Ccdc125    |
| ENSMUSG00000021692 | 564.633   | -0.501 | 0.165 | -3.029 | 2.5E-03 | 0.00900591 | Dimt1      |
| ENSMUSG00000003623 | 1206.452  | -0.501 | 0.150 | -3.345 | 8.2E-04 | 0.00332026 | Crot       |
| ENSMUSG00000003970 | 18404.662 | -0.502 | 0.081 | -6.199 | 5.7E-10 | 5.1052E-09 | Rpl18      |
| ENSMUSG00000021235 | 839.633   | -0.502 | 0.144 | -3.494 | 4.8E-04 | 0.00200247 | Coq6       |
| ENSMUSG00000089785 | 256.185   | -0.502 | 0.169 | -2.973 | 2.9E-03 | 0.01063281 | Slc25a5-ps |
| ENSMUSG00000017376 | 1140.355  | -0.502 | 0.168 | -2.983 | 2.9E-03 | 0.01033484 | Nlk        |
| ENSMUSG00000049580 | 1037.681  | -0.503 | 0.151 | -3.319 | 9.0E-04 | 0.00361522 | Tsku       |
| ENSMUSG00000064109 | 1526.327  | -0.503 | 0.146 | -3.449 | 5.6E-04 | 0.00233647 | Hcst       |
| ENSMUSG00000068922 | 884.193   | -0.503 | 0.205 | -2.453 | 1.4E-02 | 0.04249643 | Msto1      |
| ENSMUSG00000022721 | 3095.699  | -0.504 | 0.116 | -4.349 | 1.4E-05 | 7.4107E-05 | Trmt2a     |
| ENSMUSG00000076218 | 287.124   | -0.504 | 0.146 | -3.448 | 5.6E-04 | 0.00234372 | Mir692-1   |
| ENSMUSG00000009350 | 9244.554  | -0.504 | 0.149 | -3.387 | 7.1E-04 | 0.00288167 | Mpo        |
| ENSMUSG00000074457 | 1296.885  | -0.504 | 0.195 | -2.593 | 9.5E-03 | 0.0298914  | S100a16    |
| ENSMUSG00000021548 | 2422.670  | -0.505 | 0.112 | -4.496 | 6.9E-06 | 3.9251E-05 | Ccnh       |
| ENSMUSG00000049232 | 1031.565  | -0.505 | 0.164 | -3.079 | 2.1E-03 | 0.00772945 | Tigd2      |

|                    |           |        |       |        |         |            |             |
|--------------------|-----------|--------|-------|--------|---------|------------|-------------|
| ENSMUSG00000058267 | 4925.581  | -0.506 | 0.098 | -5.138 | 2.8E-07 | 1.8763E-06 | Mrps14      |
| ENSMUSG00000020692 | 839.592   | -0.506 | 0.159 | -3.194 | 1.4E-03 | 0.00540876 | Nle1        |
| ENSMUSG00000074800 | 628.619   | -0.506 | 0.125 | -4.037 | 5.4E-05 | 0.00026865 | Gm4149      |
| ENSMUSG00000024608 | 18105.184 | -0.506 | 0.133 | -3.814 | 1.4E-04 | 0.00063761 | Rps14       |
| ENSMUSG00000019823 | 1066.396  | -0.507 | 0.181 | -2.801 | 5.1E-03 | 0.0173531  | Mical1      |
| ENSMUSG00000024817 | 2721.227  | -0.507 | 0.112 | -4.532 | 5.9E-06 | 3.3473E-05 | Uhrf2       |
| ENSMUSG00000104960 | 271.501   | -0.507 | 0.193 | -2.629 | 8.6E-03 | 0.02733294 | Snhg8       |
| ENSMUSG00000042699 | 395.198   | -0.508 | 0.208 | -2.444 | 1.5E-02 | 0.04348968 | Dhx9        |
| ENSMUSG00000027599 | 2109.184  | -0.508 | 0.078 | -6.472 | 9.6E-11 | 9.2649E-10 | Armc1       |
| ENSMUSG00000034892 | 3027.019  | -0.508 | 0.178 | -2.857 | 4.3E-03 | 0.01484738 | Rps29       |
| ENSMUSG00000025785 | 1448.971  | -0.508 | 0.161 | -3.154 | 1.6E-03 | 0.00613072 | Exosc7      |
| ENSMUSG00000022914 | 1737.128  | -0.509 | 0.143 | -3.553 | 3.8E-04 | 0.00163395 | Brwd1       |
| ENSMUSG00000039068 | 1874.251  | -0.509 | 0.095 | -5.374 | 7.7E-08 | 5.5684E-07 | Zzz3        |
| ENSMUSG00000021018 | 832.762   | -0.509 | 0.165 | -3.079 | 2.1E-03 | 0.00773629 | Polr2h      |
| ENSMUSG00000024309 | 2126.672  | -0.510 | 0.112 | -4.549 | 5.4E-06 | 3.0934E-05 | Pfdn6       |
| ENSMUSG00000026667 | 1791.180  | -0.510 | 0.118 | -4.306 | 1.7E-05 | 8.921E-05  | Uhmk1       |
| ENSMUSG00000029610 | 607.416   | -0.510 | 0.140 | -3.634 | 2.8E-04 | 0.00123218 | Aimp2       |
| ENSMUSG00000036202 | 703.453   | -0.510 | 0.198 | -2.578 | 9.9E-03 | 0.03105945 | Rif1        |
| ENSMUSG00000038150 | 1277.201  | -0.510 | 0.127 | -4.009 | 6.1E-05 | 0.00030117 | Ormd13      |
| ENSMUSG00000038000 | 2062.465  | -0.510 | 0.123 | -4.162 | 3.2E-05 | 0.00016139 | Acd         |
| ENSMUSG00000109241 | 279.970   | -0.510 | 0.139 | -3.664 | 2.5E-04 | 0.00110546 | Gm7434      |
| ENSMUSG00000051185 | 4459.998  | -0.511 | 0.078 | -6.561 | 5.3E-11 | 5.2365E-10 | Fam174a     |
| ENSMUSG00000037060 | 720.114   | -0.511 | 0.167 | -3.059 | 2.2E-03 | 0.0082298  | Cavin3      |
| ENSMUSG00000051234 | 3534.314  | -0.512 | 0.082 | -6.239 | 4.4E-10 | 3.9959E-09 | Rnf7        |
| ENSMUSG00000025381 | 3218.663  | -0.512 | 0.092 | -5.574 | 2.5E-08 | 1.9004E-07 | Cnpy2       |
| ENSMUSG00000028986 | 846.038   | -0.512 | 0.154 | -3.338 | 8.4E-04 | 0.00338788 | Klh17       |
| ENSMUSG00000040751 | 3474.047  | -0.513 | 0.133 | -3.850 | 1.2E-04 | 0.00055401 | Lat2        |
| ENSMUSG00000038417 | 1279.769  | -0.513 | 0.126 | -4.066 | 4.8E-05 | 0.00023993 | Fig4        |
| ENSMUSG00000073423 | 526.594   | -0.513 | 0.179 | -2.864 | 4.2E-03 | 0.0145337  | Zfp414      |
| ENSMUSG00000080763 | 201.351   | -0.513 | 0.200 | -2.564 | 1.0E-02 | 0.03219916 | Gm12341     |
| ENSMUSG00000032705 | 613.065   | -0.513 | 0.173 | -2.970 | 3.0E-03 | 0.01071587 | Exd2        |
| ENSMUSG00000020156 | 997.854   | -0.514 | 0.148 | -3.465 | 5.3E-04 | 0.00220907 | Pwwp3a      |
| ENSMUSG00000040029 | 1842.308  | -0.514 | 0.102 | -5.032 | 4.9E-07 | 3.1642E-06 | Ipo8        |
| ENSMUSG00000062116 | 574.179   | -0.514 | 0.172 | -2.993 | 2.8E-03 | 0.01002256 | Zfp954      |
| ENSMUSG00000021794 | 6399.250  | -0.514 | 0.075 | -6.865 | 6.7E-12 | 7.0172E-11 | Glud1       |
| ENSMUSG00000001829 | 1851.707  | -0.515 | 0.129 | -3.995 | 6.5E-05 | 0.00031708 | Clpb        |
| ENSMUSG00000061024 | 2784.172  | -0.516 | 0.126 | -4.103 | 4.1E-05 | 0.00020585 | Rrs1        |
| ENSMUSG00000028495 | 4014.108  | -0.516 | 0.101 | -5.116 | 3.1E-07 | 2.0872E-06 | Rps6        |
| ENSMUSG00000096780 | 327.577   | -0.516 | 0.148 | -3.491 | 4.8E-04 | 0.00202375 | Tmem181b-ps |
| ENSMUSG00000024773 | 1260.721  | -0.516 | 0.163 | -3.174 | 1.5E-03 | 0.00577894 | Atg2a       |
| ENSMUSG00000030609 | 2424.300  | -0.516 | 0.107 | -4.819 | 1.4E-06 | 8.8909E-06 | Aen         |
| ENSMUSG00000036430 | 2166.878  | -0.516 | 0.086 | -6.027 | 1.7E-09 | 1.4422E-08 | Tbcc        |
| ENSMUSG00000030980 | 2354.573  | -0.516 | 0.076 | -6.800 | 1.0E-11 | 1.0837E-10 | Knop1       |
| ENSMUSG00000062083 | 173.788   | -0.517 | 0.214 | -2.411 | 1.6E-02 | 0.04705049 | Rpl13a-ps1  |
| ENSMUSG00000021982 | 1049.446  | -0.517 | 0.155 | -3.339 | 8.4E-04 | 0.00338682 | Cdadcl      |
| ENSMUSG00000028741 | 1833.473  | -0.517 | 0.117 | -4.419 | 9.9E-06 | 5.4841E-05 | Mrto4       |
| ENSMUSG00000068739 | 4632.171  | -0.517 | 0.092 | -5.623 | 1.9E-08 | 1.4512E-07 | Sars        |
| ENSMUSG00000033991 | 531.510   | -0.517 | 0.207 | -2.501 | 1.2E-02 | 0.0377484  | Ttc37       |
| ENSMUSG00000022439 | 3996.253  | -0.518 | 0.104 | -4.956 | 7.2E-07 | 4.5981E-06 | Parvg       |
| ENSMUSG00000053173 | 356.652   | -0.518 | 0.152 | -3.402 | 6.7E-04 | 0.00273496 | Rpl18-ps2   |
| ENSMUSG00000046949 | 1102.186  | -0.518 | 0.120 | -4.301 | 1.7E-05 | 9.0777E-05 | Nqo2        |
| ENSMUSG00000074064 | 1195.137  | -0.518 | 0.184 | -2.821 | 4.8E-03 | 0.01640657 | Mlycd       |

|                    |            |        |       |        |         |            |           |
|--------------------|------------|--------|-------|--------|---------|------------|-----------|
| ENSMUSG00000036391 | 2020.826   | -0.518 | 0.150 | -3.443 | 5.7E-04 | 0.00238251 | Sec24a    |
| ENSMUSG00000038812 | 1617.593   | -0.518 | 0.159 | -3.270 | 1.1E-03 | 0.00423799 | Trmt112   |
| ENSMUSG00000024359 | 9833.414   | -0.519 | 0.068 | -7.679 | 1.6E-14 | 2.0546E-13 | Hspa9     |
| ENSMUSG00000030970 | 2103.661   | -0.519 | 0.119 | -4.354 | 1.3E-05 | 7.2752E-05 | Ctbp2     |
| ENSMUSG00000030986 | 1434.604   | -0.520 | 0.186 | -2.792 | 5.2E-03 | 0.0177976  | Dhx32     |
| ENSMUSG00000021496 | 1008.532   | -0.520 | 0.134 | -3.881 | 1.0E-04 | 0.00049183 | Pcbd2     |
| ENSMUSG00000017286 | 2610.195   | -0.521 | 0.111 | -4.712 | 2.5E-06 | 1.4761E-05 | Glod4     |
| ENSMUSG00000022812 | 7868.864   | -0.521 | 0.099 | -5.261 | 1.4E-07 | 1.0028E-06 | Gsk3b     |
| ENSMUSG00000082978 | 173.210    | -0.522 | 0.186 | -2.803 | 5.1E-03 | 0.01726784 | Rpsa-ps11 |
| ENSMUSG00000036896 | 129765.057 | -0.522 | 0.121 | -4.300 | 1.7E-05 | 9.1283E-05 | C1qc      |
| ENSMUSG00000020459 | 980.993    | -0.522 | 0.149 | -3.501 | 4.6E-04 | 0.00195116 | Mtif2     |
| ENSMUSG00000035941 | 912.829    | -0.523 | 0.161 | -3.244 | 1.2E-03 | 0.00462814 | Ibtk      |
| ENSMUSG00000025364 | 7135.198   | -0.523 | 0.101 | -5.157 | 2.5E-07 | 1.709E-06  | Pa2g4     |
| ENSMUSG00000021474 | 3690.515   | -0.523 | 0.113 | -4.645 | 3.4E-06 | 2.0082E-05 | Sfxn1     |
| ENSMUSG00000024442 | 1051.538   | -0.523 | 0.118 | -4.419 | 9.9E-06 | 5.4999E-05 | Dele1     |
| ENSMUSG00000020430 | 3610.479   | -0.523 | 0.087 | -6.037 | 1.6E-09 | 1.3587E-08 | Pes1      |
| ENSMUSG00000030983 | 2163.729   | -0.524 | 0.106 | -4.961 | 7.0E-07 | 4.4982E-06 | Bccip     |
| ENSMUSG00000072704 | 3153.378   | -0.524 | 0.095 | -5.506 | 3.7E-08 | 2.7576E-07 | Smim1011  |
| ENSMUSG00000117679 | 1272.741   | -0.524 | 0.126 | -4.142 | 3.4E-05 | 0.00017531 | Apbb3     |
| ENSMUSG00000041199 | 664.273    | -0.525 | 0.188 | -2.790 | 5.3E-03 | 0.01789117 | Rpusd1    |
| ENSMUSG00000023110 | 1722.247   | -0.525 | 0.166 | -3.151 | 1.6E-03 | 0.00618451 | Prmt5     |
| ENSMUSG00000002010 | 6304.069   | -0.525 | 0.076 | -6.938 | 4.0E-12 | 4.2989E-11 | Idh3g     |
| ENSMUSG00000036893 | 2314.042   | -0.525 | 0.106 | -4.943 | 7.7E-07 | 4.9132E-06 | Ehmt1     |
| ENSMUSG00000044167 | 547.121    | -0.526 | 0.187 | -2.818 | 4.8E-03 | 0.01657785 | Foxo1     |
| ENSMUSG00000028964 | 6835.693   | -0.526 | 0.078 | -6.755 | 1.4E-11 | 1.4583E-10 | Park7     |
| ENSMUSG00000024527 | 3601.223   | -0.526 | 0.113 | -4.632 | 3.6E-06 | 2.1286E-05 | Afg3l2    |
| ENSMUSG00000034109 | 1092.213   | -0.526 | 0.148 | -3.554 | 3.8E-04 | 0.00162934 | Golim4    |
| ENSMUSG00000000916 | 880.070    | -0.526 | 0.131 | -3.999 | 6.4E-05 | 0.00031221 | Nsun5     |
| ENSMUSG00000042831 | 1766.185   | -0.526 | 0.120 | -4.367 | 1.3E-05 | 6.8771E-05 | Alkbh6    |
| ENSMUSG00000028096 | 752.158    | -0.526 | 0.119 | -4.416 | 1.0E-05 | 5.5698E-05 | Gpr89     |
| ENSMUSG00000021775 | 866.906    | -0.526 | 0.181 | -2.915 | 3.6E-03 | 0.01256905 | Nr1d2     |
| ENSMUSG00000017999 | 2673.279   | -0.527 | 0.126 | -4.182 | 2.9E-05 | 0.00014864 | Ddx27     |
| ENSMUSG00000030105 | 10633.766  | -0.527 | 0.070 | -7.514 | 5.7E-14 | 7.089E-13  | Arl8b     |
| ENSMUSG00000003824 | 551.058    | -0.527 | 0.155 | -3.397 | 6.8E-04 | 0.00278192 | Syce2     |
| ENSMUSG00000021171 | 1923.952   | -0.527 | 0.158 | -3.328 | 8.7E-04 | 0.00350266 | Esyt2     |
| ENSMUSG00000030741 | 3455.351   | -0.528 | 0.125 | -4.228 | 2.4E-05 | 0.00012347 | Spns1     |
| ENSMUSG00000078429 | 1339.240   | -0.528 | 0.147 | -3.590 | 3.3E-04 | 0.00143735 | Ctdsp2    |
| ENSMUSG00000034744 | 4171.438   | -0.528 | 0.100 | -5.291 | 1.2E-07 | 8.6228E-07 | Nagk      |
| ENSMUSG00000078681 | 2203.616   | -0.529 | 0.111 | -4.773 | 1.8E-06 | 1.1066E-05 | Tm2d3     |
| ENSMUSG00000059355 | 791.210    | -0.529 | 0.142 | -3.718 | 2.0E-04 | 0.00090595 | Wdr83os   |
| ENSMUSG00000058064 | 367.806    | -0.529 | 0.145 | -3.652 | 2.6E-04 | 0.00115278 | Gm10036   |
| ENSMUSG00000093930 | 2110.212   | -0.530 | 0.124 | -4.281 | 1.9E-05 | 9.9057E-05 | Hmgcs1    |
| ENSMUSG00000031353 | 6003.632   | -0.530 | 0.105 | -5.036 | 4.7E-07 | 3.1008E-06 | Rbbp7     |
| ENSMUSG00000021375 | 786.693    | -0.530 | 0.202 | -2.629 | 8.6E-03 | 0.02733352 | Kifl3a    |
| ENSMUSG00000051671 | 673.769    | -0.530 | 0.117 | -4.531 | 5.9E-06 | 3.3517E-05 | Coa6      |
| ENSMUSG00000020219 | 7198.229   | -0.531 | 0.095 | -5.558 | 2.7E-08 | 2.084E-07  | Timm13    |
| ENSMUSG00000063480 | 1509.069   | -0.531 | 0.095 | -5.600 | 2.1E-08 | 1.6564E-07 | Snu13     |
| ENSMUSG00000026374 | 7846.695   | -0.531 | 0.080 | -6.620 | 3.6E-11 | 3.5626E-10 | Tsn       |
| ENSMUSG00000114104 | 1379.020   | -0.532 | 0.219 | -2.432 | 1.5E-02 | 0.04472375 | Gm47585   |
| ENSMUSG00000028187 | 1511.316   | -0.532 | 0.131 | -4.076 | 4.6E-05 | 0.00022951 | Rpfl      |
| ENSMUSG00000032320 | 4509.937   | -0.533 | 0.092 | -5.805 | 6.4E-09 | 5.2282E-08 | Rcn2      |
| ENSMUSG00000042870 | 859.633    | -0.533 | 0.111 | -4.809 | 1.5E-06 | 9.3411E-06 | Tom1      |

|                    |           |        |       |        |         |            |            |
|--------------------|-----------|--------|-------|--------|---------|------------|------------|
| ENSMUSG00000059895 | 2039.461  | -0.533 | 0.127 | -4.197 | 2.7E-05 | 0.00014024 | Ptp4a3     |
| ENSMUSG00000025227 | 1304.400  | -0.533 | 0.141 | -3.782 | 1.6E-04 | 0.00071639 | Mfsd13a    |
| ENSMUSG00000024160 | 228.155   | -0.533 | 0.215 | -2.477 | 1.3E-02 | 0.04013439 | Spsb3      |
| ENSMUSG00000044308 | 535.373   | -0.534 | 0.202 | -2.648 | 8.1E-03 | 0.02605376 | Ubr3       |
| ENSMUSG00000032120 | 1011.601  | -0.534 | 0.180 | -2.973 | 3.0E-03 | 0.01065617 | C2cd21     |
| ENSMUSG00000038014 | 4411.307  | -0.534 | 0.124 | -4.309 | 1.6E-05 | 8.7798E-05 | Fam120a    |
| ENSMUSG00000055762 | 4990.035  | -0.535 | 0.094 | -5.691 | 1.3E-08 | 9.9574E-08 | Eef1d      |
| ENSMUSG00000095597 | 169.262   | -0.535 | 0.197 | -2.712 | 6.7E-03 | 0.02208274 | Rps7-ps3   |
| ENSMUSG00000038429 | 5029.290  | -0.535 | 0.097 | -5.490 | 4.0E-08 | 3.0039E-07 | Usp5       |
| ENSMUSG00000028223 | 643.613   | -0.536 | 0.187 | -2.862 | 4.2E-03 | 0.01461175 | Decr1      |
| ENSMUSG00000021701 | 9710.219  | -0.536 | 0.122 | -4.396 | 1.1E-05 | 6.0578E-05 | Plk2       |
| ENSMUSG00000059033 | 501.665   | -0.536 | 0.127 | -4.238 | 2.3E-05 | 0.00011842 | Rpl18a-ps1 |
| ENSMUSG00000021963 | 2570.591  | -0.537 | 0.092 | -5.841 | 5.2E-09 | 4.2631E-08 | Sap18      |
| ENSMUSG00000031320 | 6200.476  | -0.537 | 0.115 | -4.659 | 3.2E-06 | 1.8907E-05 | Rps4x      |
| ENSMUSG00000022450 | 3865.647  | -0.537 | 0.139 | -3.875 | 1.1E-04 | 0.00050408 | Ndufa6     |
| ENSMUSG00000094974 | 127.034   | -0.538 | 0.218 | -2.461 | 1.4E-02 | 0.04172006 | Rps19-ps2  |
| ENSMUSG00000001100 | 2810.079  | -0.538 | 0.111 | -4.824 | 1.4E-06 | 8.6982E-06 | Poldip2    |
| ENSMUSG00000028161 | 9159.981  | -0.539 | 0.080 | -6.724 | 1.8E-11 | 1.7982E-10 | Ppp3ca     |
| ENSMUSG00000056153 | 1532.342  | -0.539 | 0.167 | -3.222 | 1.3E-03 | 0.00495931 | Socs6      |
| ENSMUSG00000032026 | 6721.957  | -0.540 | 0.066 | -8.162 | 3.3E-16 | 4.7343E-15 | Rexo2      |
| ENSMUSG00000029554 | 986.777   | -0.540 | 0.149 | -3.623 | 2.9E-04 | 0.00127746 | Mad111     |
| ENSMUSG00000038502 | 4434.222  | -0.540 | 0.104 | -5.207 | 1.9E-07 | 1.3193E-06 | Ptov1      |
| ENSMUSG00000021770 | 1663.414  | -0.540 | 0.157 | -3.449 | 5.6E-04 | 0.00233932 | Samd8      |
| ENSMUSG00000069439 | 132.319   | -0.540 | 0.207 | -2.610 | 9.1E-03 | 0.02866475 | Gm8444     |
| ENSMUSG00000027809 | 1590.185  | -0.541 | 0.128 | -4.208 | 2.6E-05 | 0.0001338  | Etfdh      |
| ENSMUSG00000058056 | 4069.901  | -0.541 | 0.125 | -4.330 | 1.5E-05 | 8.0454E-05 | Palld      |
| ENSMUSG00000055923 | 217.535   | -0.541 | 0.220 | -2.462 | 1.4E-02 | 0.04157975 | Aasdh      |
| ENSMUSG00000020561 | 1662.604  | -0.541 | 0.118 | -4.573 | 4.8E-06 | 2.7854E-05 | Polr1f     |
| ENSMUSG00000080860 | 257.085   | -0.542 | 0.201 | -2.697 | 7.0E-03 | 0.02291367 | Gm13815    |
| ENSMUSG00000048677 | 3216.512  | -0.542 | 0.120 | -4.508 | 6.5E-06 | 3.7236E-05 | Tpcn2      |
| ENSMUSG00000020143 | 3623.965  | -0.542 | 0.118 | -4.616 | 3.9E-06 | 2.2906E-05 | Dock2      |
| ENSMUSG00000030282 | 4763.842  | -0.543 | 0.087 | -6.251 | 4.1E-10 | 3.7135E-09 | Cmas       |
| ENSMUSG00000061315 | 5918.009  | -0.543 | 0.113 | -4.788 | 1.7E-06 | 1.0344E-05 | Naca       |
| ENSMUSG00000021218 | 25202.957 | -0.543 | 0.065 | -8.310 | 9.6E-17 | 1.4259E-15 | Gdi2       |
| ENSMUSG00000023089 | 3005.284  | -0.543 | 0.150 | -3.625 | 2.9E-04 | 0.00127147 | Ndufa5     |
| ENSMUSG00000073775 | 1353.316  | -0.543 | 0.140 | -3.876 | 1.1E-04 | 0.00050232 | Kti12      |
| ENSMUSG00000008682 | 17597.357 | -0.543 | 0.141 | -3.841 | 1.2E-04 | 0.00057348 | Rpl10      |
| ENSMUSG00000097296 | 248.300   | -0.544 | 0.218 | -2.492 | 1.3E-02 | 0.03863358 | Gm26532    |
| ENSMUSG00000034312 | 914.981   | -0.544 | 0.187 | -2.909 | 3.6E-03 | 0.01278609 | Iqsec1     |
| ENSMUSG00000070738 | 2098.011  | -0.544 | 0.135 | -4.042 | 5.3E-05 | 0.00026379 | Dgkd       |
| ENSMUSG00000031838 | 2697.865  | -0.544 | 0.155 | -3.511 | 4.5E-04 | 0.00189042 | Ifi30      |
| ENSMUSG00000030342 | 18279.466 | -0.544 | 0.150 | -3.623 | 2.9E-04 | 0.00127813 | Cd9        |
| ENSMUSG00000028980 | 2839.972  | -0.545 | 0.175 | -3.122 | 1.8E-03 | 0.00677596 | H6pd       |
| ENSMUSG00000020321 | 5535.238  | -0.545 | 0.075 | -7.304 | 2.8E-13 | 3.3186E-12 | Mdh1       |
| ENSMUSG00000110344 | 244.730   | -0.545 | 0.219 | -2.487 | 1.3E-02 | 0.03911976 | Gm45716    |
| ENSMUSG00000033373 | 669.612   | -0.545 | 0.187 | -2.918 | 3.5E-03 | 0.01246823 | Fntb       |
| ENSMUSG00000033285 | 1312.053  | -0.545 | 0.146 | -3.724 | 2.0E-04 | 0.00088794 | Wdr3       |
| ENSMUSG00000022676 | 576.075   | -0.545 | 0.218 | -2.502 | 1.2E-02 | 0.03770362 | Snai2      |
| ENSMUSG00000059689 | 1033.444  | -0.546 | 0.144 | -3.786 | 1.5E-04 | 0.00070582 | Zfp637     |
| ENSMUSG00000058443 | 967.871   | -0.546 | 0.105 | -5.188 | 2.1E-07 | 1.4544E-06 | Rpl10-ps3  |
| ENSMUSG00000032959 | 3550.844  | -0.546 | 0.077 | -7.062 | 1.6E-12 | 1.8176E-11 | Pebp1      |
| ENSMUSG00000039515 | 5173.296  | -0.547 | 0.101 | -5.426 | 5.7E-08 | 4.228E-07  | Ptpa       |

|                    |           |        |       |        |         |            |               |
|--------------------|-----------|--------|-------|--------|---------|------------|---------------|
| ENSMUSG00000033033 | 754.343   | -0.547 | 0.168 | -3.247 | 1.2E-03 | 0.00457246 | Calhm2        |
| ENSMUSG00000002059 | 1233.133  | -0.547 | 0.171 | -3.197 | 1.4E-03 | 0.00535918 | Rab34         |
| ENSMUSG00000032621 | 2126.497  | -0.547 | 0.089 | -6.172 | 6.8E-10 | 6.0429E-09 | Srek1         |
| ENSMUSG00000072576 | 162.619   | -0.548 | 0.209 | -2.615 | 8.9E-03 | 0.02828468 | Gm16020       |
| ENSMUSG00000037905 | 2429.104  | -0.548 | 0.134 | -4.099 | 4.1E-05 | 0.00020889 | Bri3bp        |
| ENSMUSG00000045671 | 697.033   | -0.548 | 0.177 | -3.093 | 2.0E-03 | 0.00740944 | Spred2        |
| ENSMUSG00000005354 | 6271.042  | -0.548 | 0.085 | -6.471 | 9.7E-11 | 9.3446E-10 | Txn2          |
| ENSMUSG00000025144 | 3367.911  | -0.548 | 0.113 | -4.874 | 1.1E-06 | 6.8439E-06 | Cenpx         |
| ENSMUSG00000026554 | 3103.386  | -0.549 | 0.100 | -5.489 | 4.0E-08 | 3.0241E-07 | Dcaf8         |
| ENSMUSG00000004393 | 3685.560  | -0.549 | 0.108 | -5.070 | 4.0E-07 | 2.6229E-06 | Ddx56         |
| ENSMUSG00000031166 | 2161.201  | -0.549 | 0.118 | -4.655 | 3.2E-06 | 1.925E-05  | Wdr13         |
| ENSMUSG00000039201 | 538.623   | -0.549 | 0.148 | -3.709 | 2.1E-04 | 0.00093801 | Tbc1d25       |
| ENSMUSG00000031835 | 1797.370  | -0.550 | 0.136 | -4.032 | 5.5E-05 | 0.00027445 | Mbtps1        |
| ENSMUSG00000021054 | 3221.888  | -0.550 | 0.168 | -3.270 | 1.1E-03 | 0.00424341 | Sgpp1         |
| ENSMUSG00000074212 | 1869.268  | -0.550 | 0.128 | -4.292 | 1.8E-05 | 9.4455E-05 | Dnajb14       |
| ENSMUSG00000039016 | 1465.560  | -0.550 | 0.133 | -4.145 | 3.4E-05 | 0.00017283 | Timm8b        |
| ENSMUSG00000043300 | 2015.110  | -0.550 | 0.171 | -3.220 | 1.3E-03 | 0.00498297 | B3galnt1      |
| ENSMUSG00000027394 | 780.535   | -0.551 | 0.182 | -3.023 | 2.5E-03 | 0.00915122 | Ttl           |
| ENSMUSG00000090112 | 414.082   | -0.551 | 0.197 | -2.789 | 5.3E-03 | 0.01790861 | Shprh         |
| ENSMUSG00000015714 | 12689.788 | -0.551 | 0.067 | -8.237 | 1.8E-16 | 2.5876E-15 | Cers2         |
| ENSMUSG00000029209 | 619.711   | -0.551 | 0.175 | -3.160 | 1.6E-03 | 0.0060289  | Gnpda2        |
| ENSMUSG00000030521 | 1925.687  | -0.552 | 0.150 | -3.676 | 2.4E-04 | 0.00105899 | Mphosph10     |
| ENSMUSG00000031485 | 2006.685  | -0.552 | 0.112 | -4.925 | 8.4E-07 | 5.3482E-06 | Plpbp         |
| ENSMUSG00000051495 | 2107.500  | -0.552 | 0.132 | -4.172 | 3.0E-05 | 0.00015493 | Irf2bp2       |
| ENSMUSG00000025326 | 1588.607  | -0.552 | 0.131 | -4.211 | 2.5E-05 | 0.00013194 | Ube3a         |
| ENSMUSG00000028556 | 967.551   | -0.552 | 0.165 | -3.357 | 7.9E-04 | 0.00318773 | Dock7         |
| ENSMUSG00000029480 | 822.740   | -0.553 | 0.163 | -3.397 | 6.8E-04 | 0.00277993 | Dhx37         |
| ENSMUSG00000050323 | 606.713   | -0.553 | 0.179 | -3.089 | 2.0E-03 | 0.0074972  | Ndufaf6       |
| ENSMUSG00000071415 | 4881.797  | -0.553 | 0.129 | -4.285 | 1.8E-05 | 9.7291E-05 | Rpl23         |
| ENSMUSG00000032679 | 356.128   | -0.553 | 0.224 | -2.470 | 1.3E-02 | 0.04069583 | Cd59a         |
| ENSMUSG00000031776 | 2367.928  | -0.553 | 0.103 | -5.362 | 8.2E-08 | 5.9292E-07 | Arl2bp        |
| ENSMUSG00000033430 | 971.810   | -0.553 | 0.154 | -3.582 | 3.4E-04 | 0.00147604 | Terf2ip       |
| ENSMUSG00000025856 | 1804.403  | -0.553 | 0.137 | -4.042 | 5.3E-05 | 0.00026331 | Pdgfa         |
| ENSMUSG00000027162 | 3506.521  | -0.553 | 0.105 | -5.263 | 1.4E-07 | 9.9587E-07 | Lin7c         |
| ENSMUSG00000024993 | 3044.329  | -0.553 | 0.077 | -7.146 | 8.9E-13 | 1.005E-11  | Dennd10       |
| ENSMUSG00000027132 | 1089.343  | -0.553 | 0.123 | -4.509 | 6.5E-06 | 3.7143E-05 | Katnb11       |
| ENSMUSG00000028514 | 531.817   | -0.554 | 0.175 | -3.170 | 1.5E-03 | 0.00583562 | Usp24         |
| ENSMUSG00000025362 | 7462.006  | -0.554 | 0.150 | -3.701 | 2.1E-04 | 0.00096347 | Rps26         |
| ENSMUSG00000031749 | 1133.677  | -0.554 | 0.186 | -2.975 | 2.9E-03 | 0.01058368 | St3gal2       |
| ENSMUSG00000095526 | 149.964   | -0.554 | 0.223 | -2.488 | 1.3E-02 | 0.03902403 | Gm10243       |
| ENSMUSG00000086583 | 1029.815  | -0.555 | 0.110 | -5.063 | 4.1E-07 | 2.7203E-06 | Gm15500       |
| ENSMUSG00000039917 | 1685.112  | -0.555 | 0.165 | -3.371 | 7.5E-04 | 0.00303507 | Rhbdd2        |
| ENSMUSG00000020444 | 1979.719  | -0.555 | 0.085 | -6.548 | 5.8E-11 | 5.6853E-10 | Guk1          |
| ENSMUSG00000032332 | 1014.015  | -0.556 | 0.168 | -3.319 | 9.0E-04 | 0.00361383 | Col12a1       |
| ENSMUSG00000031358 | 1328.751  | -0.556 | 0.119 | -4.684 | 2.8E-06 | 1.6816E-05 | Msl3          |
| ENSMUSG00000045071 | 548.641   | -0.556 | 0.199 | -2.801 | 5.1E-03 | 0.01736248 | E130308A19Rik |
| ENSMUSG00000026526 | 2247.361  | -0.557 | 0.124 | -4.498 | 6.8E-06 | 3.8853E-05 | Fhl1          |
| ENSMUSG00000046721 | 936.393   | -0.557 | 0.090 | -6.187 | 6.1E-10 | 5.4968E-09 | Rpl14-ps1     |
| ENSMUSG00000032288 | 1543.705  | -0.557 | 0.121 | -4.589 | 4.4E-06 | 2.5849E-05 | Imp3          |
| ENSMUSG00000038503 | 1803.893  | -0.557 | 0.091 | -6.108 | 1.0E-09 | 8.8802E-09 | Mesd          |
| ENSMUSG00000037104 | 1726.022  | -0.558 | 0.127 | -4.386 | 1.2E-05 | 6.3379E-05 | Socs5         |
| ENSMUSG00000041966 | 774.068   | -0.558 | 0.147 | -3.783 | 1.5E-04 | 0.0007132  | Dcaf17        |

|                    |           |        |       |        |         |            |            |
|--------------------|-----------|--------|-------|--------|---------|------------|------------|
| ENSMUSG00000034371 | 404.358   | -0.559 | 0.232 | -2.410 | 1.6E-02 | 0.04719853 | Tkfc       |
| ENSMUSG00000057469 | 1155.544  | -0.559 | 0.151 | -3.703 | 2.1E-04 | 0.00095703 | E2f6       |
| ENSMUSG00000050043 | 1317.812  | -0.559 | 0.118 | -4.751 | 2.0E-06 | 1.2308E-05 | Tmx2       |
| ENSMUSG00000019087 | 24538.959 | -0.560 | 0.076 | -7.328 | 2.3E-13 | 2.7765E-12 | Atp6ap1    |
| ENSMUSG00000081051 | 1481.272  | -0.560 | 0.097 | -5.796 | 6.8E-09 | 5.5012E-08 | Gm15427    |
| ENSMUSG00000037339 | 1752.940  | -0.560 | 0.155 | -3.613 | 3.0E-04 | 0.00132478 | Fam53a     |
| ENSMUSG00000026618 | 1705.780  | -0.560 | 0.133 | -4.222 | 2.4E-05 | 0.0001261  | Iars2      |
| ENSMUSG00000009927 | 8233.857  | -0.561 | 0.138 | -4.077 | 4.6E-05 | 0.00022908 | Rps25      |
| ENSMUSG00000032462 | 804.677   | -0.561 | 0.185 | -3.033 | 2.4E-03 | 0.00887552 | Pik3cb     |
| ENSMUSG00000042605 | 593.167   | -0.561 | 0.193 | -2.913 | 3.6E-03 | 0.01262226 | Atxn2      |
| ENSMUSG00000036775 | 1276.348  | -0.561 | 0.191 | -2.939 | 3.3E-03 | 0.01175397 | Decr2      |
| ENSMUSG00000037236 | 1935.182  | -0.561 | 0.101 | -5.553 | 2.8E-08 | 2.1335E-07 | Matr3      |
| ENSMUSG00000025921 | 631.381   | -0.561 | 0.196 | -2.860 | 4.2E-03 | 0.01471346 | Rdh10      |
| ENSMUSG00000042042 | 1015.060  | -0.561 | 0.158 | -3.550 | 3.9E-04 | 0.00165459 | Csgalnact2 |
| ENSMUSG00000026544 | 731.975   | -0.562 | 0.217 | -2.591 | 9.6E-03 | 0.03003383 | Dusp23     |
| ENSMUSG00000024068 | 1119.740  | -0.562 | 0.115 | -4.887 | 1.0E-06 | 6.4302E-06 | Spast      |
| ENSMUSG00000066324 | 2946.847  | -0.562 | 0.101 | -5.578 | 2.4E-08 | 1.8593E-07 | Bpnt2      |
| ENSMUSG00000054766 | 11840.502 | -0.562 | 0.078 | -7.191 | 6.4E-13 | 7.3949E-12 | Set        |
| ENSMUSG00000096199 | 429.156   | -0.562 | 0.174 | -3.229 | 1.2E-03 | 0.0048422  | Ptrhd1     |
| ENSMUSG00000004530 | 10193.999 | -0.562 | 0.089 | -6.322 | 2.6E-10 | 2.3962E-09 | Coro1c     |
| ENSMUSG00000025204 | 4588.294  | -0.563 | 0.091 | -6.162 | 7.2E-10 | 6.4027E-09 | Ndufb8     |
| ENSMUSG00000033554 | 1450.024  | -0.563 | 0.132 | -4.258 | 2.1E-05 | 0.0001086  | Dph5       |
| ENSMUSG00000020691 | 1269.842  | -0.563 | 0.153 | -3.688 | 2.3E-04 | 0.00101231 | Mettl2     |
| ENSMUSG00000031901 | 781.884   | -0.563 | 0.187 | -3.012 | 2.6E-03 | 0.00947977 | Dus2       |
| ENSMUSG00000028330 | 1663.598  | -0.563 | 0.111 | -5.071 | 4.0E-07 | 2.613E-06  | Ncbp1      |
| ENSMUSG00000025372 | 2090.370  | -0.563 | 0.142 | -3.974 | 7.1E-05 | 0.00034384 | Baiap2     |
| ENSMUSG00000039842 | 489.456   | -0.563 | 0.166 | -3.402 | 6.7E-04 | 0.0027353  | Mcp1       |
| ENSMUSG00000042694 | 387.933   | -0.564 | 0.191 | -2.958 | 3.1E-03 | 0.01111969 | Stn1       |
| ENSMUSG00000038451 | 3513.846  | -0.564 | 0.127 | -4.432 | 9.3E-06 | 5.1953E-05 | Spsb2      |
| ENSMUSG00000002731 | 717.202   | -0.564 | 0.172 | -3.280 | 1.0E-03 | 0.00410646 | Prkra      |
| ENSMUSG00000082064 | 303.307   | -0.565 | 0.145 | -3.906 | 9.4E-05 | 0.00044781 | Rpl5-ps2   |
| ENSMUSG00000032423 | 2078.401  | -0.565 | 0.112 | -5.043 | 4.6E-07 | 2.9936E-06 | Syncrip    |
| ENSMUSG00000072640 | 324.491   | -0.565 | 0.220 | -2.572 | 1.0E-02 | 0.03149023 | Lym9       |
| ENSMUSG00000030610 | 603.010   | -0.565 | 0.205 | -2.758 | 5.8E-03 | 0.01946968 | Det1       |
| ENSMUSG00000049792 | 1541.465  | -0.565 | 0.127 | -4.442 | 8.9E-06 | 4.9805E-05 | Bag5       |
| ENSMUSG00000033540 | 2237.695  | -0.565 | 0.161 | -3.506 | 4.5E-04 | 0.00191853 | Idua       |
| ENSMUSG00000053716 | 2466.395  | -0.566 | 0.133 | -4.260 | 2.0E-05 | 0.00010787 | Dusp7      |
| ENSMUSG00000057605 | 192.788   | -0.566 | 0.190 | -2.982 | 2.9E-03 | 0.01036323 | Gm6807     |
| ENSMUSG00000038539 | 1602.563  | -0.566 | 0.148 | -3.835 | 1.3E-04 | 0.00058756 | Atf5       |
| ENSMUSG00000030451 | 1162.173  | -0.567 | 0.145 | -3.918 | 8.9E-05 | 0.00042634 | Herc2      |
| ENSMUSG00000025995 | 1388.144  | -0.567 | 0.158 | -3.584 | 3.4E-04 | 0.00146778 | Wdr75      |
| ENSMUSG00000047084 | 702.061   | -0.567 | 0.172 | -3.289 | 1.0E-03 | 0.00398774 | Ngrn       |
| ENSMUSG00000027342 | 4890.905  | -0.567 | 0.103 | -5.531 | 3.2E-08 | 2.4119E-07 | Pena       |
| ENSMUSG00000005299 | 4849.312  | -0.567 | 0.069 | -8.198 | 2.4E-16 | 3.5464E-15 | Letm1      |
| ENSMUSG00000112239 | 124.414   | -0.567 | 0.212 | -2.681 | 7.3E-03 | 0.02388488 | Gm17823    |
| ENSMUSG00000043866 | 7051.925  | -0.567 | 0.075 | -7.594 | 3.1E-14 | 3.9061E-13 | Taf10      |
| ENSMUSG00000030400 | 380.726   | -0.568 | 0.238 | -2.389 | 1.7E-02 | 0.04959986 | Ercc2      |
| ENSMUSG00000035521 | 2063.469  | -0.568 | 0.071 | -8.004 | 1.2E-15 | 1.6628E-14 | Gnptg      |
| ENSMUSG00000020978 | 2316.090  | -0.568 | 0.123 | -4.617 | 3.9E-06 | 2.2852E-05 | Klhdc2     |
| ENSMUSG00000023156 | 953.330   | -0.568 | 0.147 | -3.867 | 1.1E-04 | 0.00051903 | Rpp14      |
| ENSMUSG00000020528 | 502.512   | -0.568 | 0.237 | -2.400 | 1.6E-02 | 0.04828498 | Prpsap2    |
| ENSMUSG00000046792 | 1608.097  | -0.568 | 0.113 | -5.031 | 4.9E-07 | 3.1849E-06 | Zfp787     |



|                    |           |        |       |        |         |            |            |
|--------------------|-----------|--------|-------|--------|---------|------------|------------|
| ENSMUSG00000026281 | 1841.007  | -0.569 | 0.111 | -5.106 | 3.3E-07 | 2.2012E-06 | Dtymk      |
| ENSMUSG00000078439 | 311.746   | -0.570 | 0.226 | -2.524 | 1.2E-02 | 0.03571852 | Smim24     |
| ENSMUSG00000023026 | 1486.050  | -0.570 | 0.158 | -3.599 | 3.2E-04 | 0.0013919  | Dip2b      |
| ENSMUSG00000037326 | 697.574   | -0.570 | 0.182 | -3.139 | 1.7E-03 | 0.00642695 | Capn15     |
| ENSMUSG00000042426 | 1065.243  | -0.570 | 0.162 | -3.511 | 4.5E-04 | 0.00189136 | Dhx29      |
| ENSMUSG00000040359 | 2331.589  | -0.570 | 0.108 | -5.304 | 1.1E-07 | 8.0643E-07 | Ufl1       |
| ENSMUSG00000027207 | 2827.758  | -0.571 | 0.093 | -6.163 | 7.2E-10 | 6.3843E-09 | Galk2      |
| ENSMUSG00000020700 | 3554.113  | -0.571 | 0.145 | -3.930 | 8.5E-05 | 0.00040728 | Map3k3     |
| ENSMUSG00000001467 | 1766.732  | -0.571 | 0.162 | -3.514 | 4.4E-04 | 0.00187304 | Cyp51      |
| ENSMUSG00000041439 | 661.977   | -0.571 | 0.226 | -2.530 | 1.1E-02 | 0.0351682  | Mfsd6      |
| ENSMUSG00000028960 | 1267.237  | -0.571 | 0.129 | -4.411 | 1.0E-05 | 5.6736E-05 | Ube4b      |
| ENSMUSG00000022671 | 382.033   | -0.571 | 0.191 | -2.987 | 2.8E-03 | 0.01021192 | Mzt2       |
| ENSMUSG00000082646 | 279.159   | -0.571 | 0.201 | -2.846 | 4.4E-03 | 0.01530042 | Gm12732    |
| ENSMUSG00000028700 | 1761.329  | -0.571 | 0.150 | -3.821 | 1.3E-04 | 0.00061947 | Pomgnt1    |
| ENSMUSG00000029050 | 1596.222  | -0.572 | 0.144 | -3.973 | 7.1E-05 | 0.00034505 | Ski        |
| ENSMUSG00000038604 | 2256.931  | -0.572 | 0.138 | -4.147 | 3.4E-05 | 0.00017152 | Ripor1     |
| ENSMUSG00000094664 | 313.119   | -0.572 | 0.177 | -3.232 | 1.2E-03 | 0.00479156 | Rpl35a-ps6 |
| ENSMUSG00000014907 | 215.427   | -0.573 | 0.212 | -2.706 | 6.8E-03 | 0.02241267 | Naf1       |
| ENSMUSG00000031578 | 602.840   | -0.573 | 0.199 | -2.874 | 4.1E-03 | 0.0141385  | Mak16      |
| ENSMUSG00000045128 | 16411.375 | -0.573 | 0.128 | -4.478 | 7.5E-06 | 4.2576E-05 | Rpl18a     |
| ENSMUSG00000028107 | 1398.499  | -0.574 | 0.150 | -3.831 | 1.3E-04 | 0.00059718 | Tars2      |
| ENSMUSG00000002985 | #####     | -0.575 | 0.139 | -4.150 | 3.3E-05 | 0.0001698  | ApoE       |
| ENSMUSG00000024764 | 2195.450  | -0.576 | 0.136 | -4.227 | 2.4E-05 | 0.00012405 | Naa40      |
| ENSMUSG00000023571 | 807.166   | -0.576 | 0.168 | -3.420 | 6.3E-04 | 0.00257466 | C1qtnf12   |
| ENSMUSG00000024013 | 1819.456  | -0.576 | 0.204 | -2.827 | 4.7E-03 | 0.0161672  | Fgd2       |
| ENSMUSG00000056228 | 674.865   | -0.577 | 0.146 | -3.947 | 7.9E-05 | 0.00038264 | Cars2      |
| ENSMUSG00000028049 | 3576.230  | -0.577 | 0.081 | -7.088 | 1.4E-12 | 1.5162E-11 | Scamp3     |
| ENSMUSG00000036916 | 436.797   | -0.577 | 0.144 | -4.022 | 5.8E-05 | 0.00028542 | Zfp280c    |
| ENSMUSG00000066232 | 1411.612  | -0.577 | 0.113 | -5.128 | 2.9E-07 | 1.976E-06  | Ipo7       |
| ENSMUSG00000006476 | 1118.083  | -0.577 | 0.184 | -3.134 | 1.7E-03 | 0.006528   | Nsmf       |
| ENSMUSG00000074749 | 299.540   | -0.577 | 0.198 | -2.911 | 3.6E-03 | 0.01270582 | Kiz        |
| ENSMUSG00000033773 | 517.438   | -0.577 | 0.221 | -2.612 | 9.0E-03 | 0.02854537 | Rpap2      |
| ENSMUSG00000028102 | 1418.035  | -0.577 | 0.102 | -5.679 | 1.4E-08 | 1.063E-07  | Pex11b     |
| ENSMUSG00000032763 | 2393.030  | -0.578 | 0.123 | -4.694 | 2.7E-06 | 1.6081E-05 | Ilvbl      |
| ENSMUSG00000031158 | 2367.680  | -0.578 | 0.144 | -4.004 | 6.2E-05 | 0.00030657 | Timm17b    |
| ENSMUSG00000021951 | 1896.563  | -0.578 | 0.107 | -5.420 | 6.0E-08 | 4.3819E-07 | Eef1akmt1  |
| ENSMUSG00000011096 | 3668.255  | -0.578 | 0.107 | -5.425 | 5.8E-08 | 4.2686E-07 | Akt1s1     |
| ENSMUSG00000022210 | 885.634   | -0.578 | 0.175 | -3.294 | 9.9E-04 | 0.00391536 | Dhrs4      |
| ENSMUSG00000001642 | 2140.492  | -0.578 | 0.095 | -6.087 | 1.2E-09 | 1.0088E-08 | Akr1b3     |
| ENSMUSG00000024096 | 2862.474  | -0.579 | 0.110 | -5.269 | 1.4E-07 | 9.6398E-07 | Ralbp1     |
| ENSMUSG00000033105 | 421.983   | -0.579 | 0.210 | -2.758 | 5.8E-03 | 0.01945774 | Lss        |
| ENSMUSG00000048756 | 931.255   | -0.579 | 0.153 | -3.795 | 1.5E-04 | 0.00068328 | Foxo3      |
| ENSMUSG00000027236 | 1409.906  | -0.579 | 0.103 | -5.614 | 2.0E-08 | 1.5266E-07 | Eif3j1     |
| ENSMUSG00000029512 | 951.771   | -0.579 | 0.159 | -3.636 | 2.8E-04 | 0.00122145 | Ulk1       |
| ENSMUSG00000039001 | 3125.180  | -0.579 | 0.168 | -3.449 | 5.6E-04 | 0.00234046 | Rps21      |
| ENSMUSG00000049800 | 3054.525  | -0.580 | 0.103 | -5.649 | 1.6E-08 | 1.2574E-07 | Sertad2    |
| ENSMUSG00000105879 | 148.469   | -0.580 | 0.190 | -3.055 | 2.3E-03 | 0.00832607 | Gm6204     |
| ENSMUSG00000025868 | 1748.171  | -0.580 | 0.123 | -4.698 | 2.6E-06 | 1.5779E-05 | Higd2a     |
| ENSMUSG00000021175 | 400.902   | -0.580 | 0.226 | -2.563 | 1.0E-02 | 0.03230829 | Cdca71     |
| ENSMUSG00000071657 | 3830.577  | -0.580 | 0.113 | -5.153 | 2.6E-07 | 1.7378E-06 | Bsel2      |
| ENSMUSG00000091509 | 306.766   | -0.581 | 0.211 | -2.749 | 6.0E-03 | 0.01995304 | Gm17066    |
| ENSMUSG00000024446 | 1482.356  | -0.581 | 0.128 | -4.527 | 6.0E-06 | 3.4138E-05 | Rpp21      |

|                    |           |        |       |        |         |            |            |
|--------------------|-----------|--------|-------|--------|---------|------------|------------|
| ENSMUSG00000031023 | 1370.767  | -0.582 | 0.109 | -5.320 | 1.0E-07 | 7.3763E-07 | Akip1      |
| ENSMUSG00000031644 | 380.055   | -0.582 | 0.190 | -3.064 | 2.2E-03 | 0.00810412 | Nek1       |
| ENSMUSG00000037499 | 1336.100  | -0.583 | 0.145 | -4.025 | 5.7E-05 | 0.00028156 | Nenf       |
| ENSMUSG00000059447 | 1524.841  | -0.583 | 0.101 | -5.777 | 7.6E-09 | 6.1496E-08 | Hadhb      |
| ENSMUSG00000035776 | 614.375   | -0.583 | 0.215 | -2.707 | 6.8E-03 | 0.02234262 | Cd9912     |
| ENSMUSG00000044795 | 210.871   | -0.583 | 0.188 | -3.101 | 1.9E-03 | 0.00722954 | Cyb5d1     |
| ENSMUSG00000056019 | 378.718   | -0.584 | 0.170 | -3.428 | 6.1E-04 | 0.00250592 | Zfp709     |
| ENSMUSG00000048027 | 2314.734  | -0.584 | 0.102 | -5.733 | 9.9E-09 | 7.899E-08  | Rgmb       |
| ENSMUSG00000024844 | 14098.892 | -0.584 | 0.117 | -4.988 | 6.1E-07 | 3.9342E-06 | Banfl      |
| ENSMUSG00000107176 | 412.121   | -0.585 | 0.136 | -4.287 | 1.8E-05 | 9.6397E-05 | Gm9794     |
| ENSMUSG00000056602 | 323.050   | -0.585 | 0.229 | -2.554 | 1.1E-02 | 0.03309373 | Fry        |
| ENSMUSG00000022003 | 984.332   | -0.586 | 0.212 | -2.763 | 5.7E-03 | 0.01920824 | Slc25a30   |
| ENSMUSG00000058558 | 4891.425  | -0.586 | 0.118 | -4.952 | 7.3E-07 | 4.685E-06  | Rpl5       |
| ENSMUSG00000057841 | 13684.782 | -0.586 | 0.133 | -4.416 | 1.0E-05 | 5.5605E-05 | Rpl32      |
| ENSMUSG00000038271 | 811.999   | -0.587 | 0.147 | -3.990 | 6.6E-05 | 0.00032359 | Iffo1      |
| ENSMUSG00000035765 | 1338.666  | -0.587 | 0.145 | -4.034 | 5.5E-05 | 0.00027203 | Dym        |
| ENSMUSG00000020034 | 1278.428  | -0.587 | 0.189 | -3.104 | 1.9E-03 | 0.0071711  | Tcp1112    |
| ENSMUSG00000028243 | 398.397   | -0.587 | 0.196 | -2.986 | 2.8E-03 | 0.0102352  | Ubxn2b     |
| ENSMUSG00000001755 | 1393.055  | -0.587 | 0.125 | -4.695 | 2.7E-06 | 1.5973E-05 | Coasy      |
| ENSMUSG00000022051 | 3087.225  | -0.587 | 0.108 | -5.426 | 5.8E-08 | 4.2294E-07 | Bnip31     |
| ENSMUSG00000048371 | 1110.419  | -0.587 | 0.163 | -3.595 | 3.2E-04 | 0.00141274 | Pdp2       |
| ENSMUSG00000040407 | 1941.420  | -0.587 | 0.120 | -4.903 | 9.5E-07 | 5.9633E-06 | Akap9      |
| ENSMUSG00000016319 | 29623.324 | -0.587 | 0.095 | -6.169 | 6.9E-10 | 6.157E-09  | Slc25a5    |
| ENSMUSG00000015214 | 1835.827  | -0.587 | 0.165 | -3.567 | 3.6E-04 | 0.0015582  | Mtmr1      |
| ENSMUSG00000028906 | 2054.065  | -0.588 | 0.127 | -4.613 | 4.0E-06 | 2.3283E-05 | Epb41      |
| ENSMUSG00000061477 | 7028.155  | -0.588 | 0.087 | -6.766 | 1.3E-11 | 1.3613E-10 | Rps7       |
| ENSMUSG00000031534 | 915.263   | -0.589 | 0.170 | -3.458 | 5.4E-04 | 0.00226811 | Smim19     |
| ENSMUSG00000020392 | 2679.963  | -0.589 | 0.091 | -6.434 | 1.2E-10 | 1.1823E-09 | Cdkn2aipnl |
| ENSMUSG00000071654 | 1452.127  | -0.589 | 0.115 | -5.098 | 3.4E-07 | 2.286E-06  | Uqcc3      |
| ENSMUSG00000025508 | 8986.151  | -0.589 | 0.146 | -4.023 | 5.8E-05 | 0.00028425 | Rplp2      |
| ENSMUSG00000032667 | 5191.435  | -0.589 | 0.101 | -5.862 | 4.6E-09 | 3.7925E-08 | Pon2       |
| ENSMUSG00000082474 | 103.715   | -0.589 | 0.240 | -2.455 | 1.4E-02 | 0.04229926 | Gm8213     |
| ENSMUSG00000038268 | 234.909   | -0.589 | 0.210 | -2.809 | 5.0E-03 | 0.01698228 | Ovca2      |
| ENSMUSG00000024063 | 735.639   | -0.590 | 0.146 | -4.028 | 5.6E-05 | 0.00027889 | Lbh        |
| ENSMUSG00000022528 | 1103.880  | -0.590 | 0.183 | -3.232 | 1.2E-03 | 0.0047978  | Hes1       |
| ENSMUSG00000028683 | 1301.379  | -0.590 | 0.157 | -3.758 | 1.7E-04 | 0.00078356 | Eif2b3     |
| ENSMUSG00000028101 | 1257.930  | -0.590 | 0.155 | -3.815 | 1.4E-04 | 0.00063396 | Pias3      |
| ENSMUSG00000018999 | 1606.203  | -0.591 | 0.134 | -4.422 | 9.8E-06 | 5.4245E-05 | Slc35b4    |
| ENSMUSG00000024854 | 973.836   | -0.591 | 0.129 | -4.587 | 4.5E-06 | 2.6076E-05 | Pold4      |
| ENSMUSG00000062867 | 1260.806  | -0.591 | 0.130 | -4.541 | 5.6E-06 | 3.2156E-05 | Impdh2     |
| ENSMUSG00000017760 | 42141.914 | -0.592 | 0.083 | -7.105 | 1.2E-12 | 1.3436E-11 | Ctsa       |
| ENSMUSG00000040463 | 3497.892  | -0.592 | 0.142 | -4.157 | 3.2E-05 | 0.00016483 | Mybbp1a    |
| ENSMUSG00000028251 | 431.408   | -0.592 | 0.170 | -3.475 | 5.1E-04 | 0.00213878 | Tstd3      |
| ENSMUSG00000034729 | 1544.657  | -0.592 | 0.129 | -4.579 | 4.7E-06 | 2.7056E-05 | Mrps10     |
| ENSMUSG00000018415 | 995.941   | -0.592 | 0.138 | -4.293 | 1.8E-05 | 9.4236E-05 | Gid4       |
| ENSMUSG00000058886 | 1177.999  | -0.592 | 0.121 | -4.891 | 1.0E-06 | 6.3166E-06 | Deaf1      |
| ENSMUSG00000019139 | 4589.972  | -0.594 | 0.097 | -6.109 | 1.0E-09 | 8.8021E-09 | Isynal     |
| ENSMUSG00000028173 | 4419.414  | -0.594 | 0.121 | -4.888 | 1.0E-06 | 6.3992E-06 | Wls        |
| ENSMUSG00000028068 | 302.137   | -0.595 | 0.245 | -2.424 | 1.5E-02 | 0.04558359 | Iqgap3     |
| ENSMUSG00000045435 | 1385.099  | -0.595 | 0.135 | -4.414 | 1.0E-05 | 5.6134E-05 | Tmem60     |
| ENSMUSG00000025026 | 1382.445  | -0.596 | 0.173 | -3.438 | 5.9E-04 | 0.0024232  | Add3       |
| ENSMUSG00000015882 | 474.407   | -0.596 | 0.169 | -3.521 | 4.3E-04 | 0.00182271 | Lcorl      |

|                    |           |        |       |        |         |            |               |
|--------------------|-----------|--------|-------|--------|---------|------------|---------------|
| ENSMUSG00000047881 | 1598.025  | -0.596 | 0.136 | -4.390 | 1.1E-05 | 6.2257E-05 | Rell1         |
| ENSMUSG00000001436 | 1152.560  | -0.596 | 0.172 | -3.463 | 5.3E-04 | 0.00222803 | Slc19a1       |
| ENSMUSG00000058070 | 239.458   | -0.596 | 0.220 | -2.709 | 6.7E-03 | 0.02220459 | Eml1          |
| ENSMUSG00000027999 | 1058.783  | -0.596 | 0.128 | -4.650 | 3.3E-06 | 1.9697E-05 | Pla2g12a      |
| ENSMUSG00000081382 | 169.560   | -0.597 | 0.179 | -3.332 | 8.6E-04 | 0.0034619  | Rpl18-ps1     |
| ENSMUSG00000038080 | 669.382   | -0.597 | 0.155 | -3.856 | 1.2E-04 | 0.00054096 | Kdm1b         |
| ENSMUSG00000015176 | 2377.065  | -0.597 | 0.104 | -5.749 | 9.0E-09 | 7.1898E-08 | Nolc1         |
| ENSMUSG00000022550 | 942.202   | -0.597 | 0.190 | -3.146 | 1.7E-03 | 0.00629951 | Adck5         |
| ENSMUSG00000006344 | 482.662   | -0.597 | 0.222 | -2.686 | 7.2E-03 | 0.02354967 | Ggt5          |
| ENSMUSG00000022114 | 2755.166  | -0.597 | 0.137 | -4.357 | 1.3E-05 | 7.1757E-05 | Spry2         |
| ENSMUSG00000045237 | 613.853   | -0.597 | 0.148 | -4.037 | 5.4E-05 | 0.0002685  | Eola1         |
| ENSMUSG00000059159 | 1251.839  | -0.598 | 0.149 | -4.014 | 6.0E-05 | 0.00029488 | Gm8129        |
| ENSMUSG00000052428 | 4313.270  | -0.598 | 0.086 | -6.991 | 2.7E-12 | 2.9767E-11 | Tmco1         |
| ENSMUSG00000028248 | 2481.806  | -0.598 | 0.110 | -5.452 | 5.0E-08 | 3.6782E-07 | Pnizr         |
| ENSMUSG00000024378 | 757.121   | -0.598 | 0.171 | -3.495 | 4.7E-04 | 0.00199525 | Stard4        |
| ENSMUSG00000022704 | 392.243   | -0.598 | 0.190 | -3.152 | 1.6E-03 | 0.00617829 | Qtrt2         |
| ENSMUSG00000058600 | 949.362   | -0.598 | 0.145 | -4.122 | 3.7E-05 | 0.00019003 | Rpl30         |
| ENSMUSG00000005469 | 4062.017  | -0.599 | 0.102 | -5.845 | 5.1E-09 | 4.1648E-08 | Prkaca        |
| ENSMUSG00000017119 | 1628.527  | -0.599 | 0.133 | -4.489 | 7.2E-06 | 4.0555E-05 | Nbr1          |
| ENSMUSG00000033365 | 3009.245  | -0.599 | 0.114 | -5.256 | 1.5E-07 | 1.0334E-06 | Ipo13         |
| ENSMUSG00000039478 | 425.755   | -0.599 | 0.174 | -3.435 | 5.9E-04 | 0.00244945 | Micu3         |
| ENSMUSG00000079139 | 175.776   | -0.599 | 0.233 | -2.571 | 1.0E-02 | 0.03162646 | Gm4204        |
| ENSMUSG00000040560 | 836.045   | -0.599 | 0.156 | -3.848 | 1.2E-04 | 0.00055715 | Wdr7          |
| ENSMUSG00000055932 | 2253.306  | -0.599 | 0.127 | -4.725 | 2.3E-06 | 1.39E-05   | Fto           |
| ENSMUSG00000007817 | 3873.992  | -0.600 | 0.111 | -5.388 | 7.1E-08 | 5.1882E-07 | Zmiz1         |
| ENSMUSG00000027472 | 3466.491  | -0.600 | 0.088 | -6.815 | 9.5E-12 | 9.8397E-11 | Pdrg1         |
| ENSMUSG00000049521 | 673.576   | -0.600 | 0.245 | -2.447 | 1.4E-02 | 0.04314747 | Cdc42ep1      |
| ENSMUSG00000040177 | 568.474   | -0.600 | 0.196 | -3.056 | 2.2E-03 | 0.00829571 | 2310057M21Rik |
| ENSMUSG00000022358 | 369.651   | -0.600 | 0.232 | -2.586 | 9.7E-03 | 0.03043851 | Fbxo32        |
| ENSMUSG00000029033 | 808.431   | -0.601 | 0.180 | -3.328 | 8.7E-04 | 0.00350062 | Acap3         |
| ENSMUSG00000002222 | 592.286   | -0.602 | 0.221 | -2.716 | 6.6E-03 | 0.02184825 | Rmnd5a        |
| ENSMUSG00000008604 | 3895.183  | -0.602 | 0.124 | -4.836 | 1.3E-06 | 8.2046E-06 | Ubqln4        |
| ENSMUSG00000039787 | 679.548   | -0.602 | 0.166 | -3.615 | 3.0E-04 | 0.00131517 | Cercam        |
| ENSMUSG00000021000 | 4529.802  | -0.602 | 0.109 | -5.541 | 3.0E-08 | 2.2798E-07 | Mia2          |
| ENSMUSG00000027884 | 1697.928  | -0.602 | 0.117 | -5.126 | 3.0E-07 | 1.9908E-06 | Clcc1         |
| ENSMUSG00000040479 | 15859.858 | -0.602 | 0.084 | -7.162 | 8.0E-13 | 9.0535E-12 | Dgkz          |
| ENSMUSG00000020441 | 702.561   | -0.603 | 0.142 | -4.253 | 2.1E-05 | 0.00011109 | 2310033P09Rik |
| ENSMUSG00000082193 | 1105.836  | -0.603 | 0.129 | -4.689 | 2.7E-06 | 1.6425E-05 | Rpl5-ps1      |
| ENSMUSG00000028684 | 1652.116  | -0.603 | 0.134 | -4.496 | 6.9E-06 | 3.9265E-05 | Urod          |
| ENSMUSG00000082561 | 1379.832  | -0.603 | 0.099 | -6.066 | 1.3E-09 | 1.1411E-08 | Gm15580       |
| ENSMUSG00000021500 | 2780.102  | -0.603 | 0.098 | -6.125 | 9.1E-10 | 8.0285E-09 | Ddx46         |
| ENSMUSG00000039759 | 782.142   | -0.604 | 0.127 | -4.739 | 2.1E-06 | 1.3007E-05 | Thap3         |
| ENSMUSG00000032298 | 504.384   | -0.604 | 0.205 | -2.952 | 3.2E-03 | 0.01130089 | Neil1         |
| ENSMUSG00000073468 | 1519.927  | -0.604 | 0.095 | -6.335 | 2.4E-10 | 2.2178E-09 | Sft2d1        |
| ENSMUSG00000007338 | 1375.550  | -0.604 | 0.136 | -4.443 | 8.9E-06 | 4.9512E-05 | Mrpl49        |
| ENSMUSG00000057863 | 5508.223  | -0.605 | 0.189 | -3.191 | 1.4E-03 | 0.00546874 | Rpl36         |
| ENSMUSG00000042303 | 678.473   | -0.605 | 0.191 | -3.164 | 1.6E-03 | 0.00595726 | Sgsm3         |
| ENSMUSG00000019763 | 525.328   | -0.606 | 0.180 | -3.375 | 7.4E-04 | 0.00299636 | Rmnd1         |
| ENSMUSG00000028062 | 5610.265  | -0.607 | 0.105 | -5.773 | 7.8E-09 | 6.265E-08  | Lamtor2       |
| ENSMUSG00000034501 | 582.909   | -0.607 | 0.198 | -3.057 | 2.2E-03 | 0.00828051 | Pcnx4         |
| ENSMUSG00000038535 | 440.181   | -0.607 | 0.230 | -2.640 | 8.3E-03 | 0.02657047 | Zfp280d       |
| ENSMUSG00000093904 | 1912.917  | -0.607 | 0.101 | -6.031 | 1.6E-09 | 1.4053E-08 | Tomm20        |

|                    |           |        |       |        |         |            |               |
|--------------------|-----------|--------|-------|--------|---------|------------|---------------|
| ENSMUSG00000016757 | 1026.508  | -0.608 | 0.154 | -3.946 | 7.9E-05 | 0.00038318 | Ttll12        |
| ENSMUSG00000032192 | 348.920   | -0.609 | 0.249 | -2.441 | 1.5E-02 | 0.0437642  | Gnb5          |
| ENSMUSG00000061979 | 701.939   | -0.610 | 0.201 | -3.036 | 2.4E-03 | 0.00880689 | Rcc11         |
| ENSMUSG00000117804 | 132.216   | -0.610 | 0.229 | -2.664 | 7.7E-03 | 0.02493119 | Gm6252        |
| ENSMUSG00000028550 | 1053.636  | -0.611 | 0.180 | -3.388 | 7.0E-04 | 0.00286491 | Atg4c         |
| ENSMUSG00000042569 | 1589.699  | -0.611 | 0.103 | -5.912 | 3.4E-09 | 2.8255E-08 | Dhrs7b        |
| ENSMUSG00000064341 | 49750.337 | -0.612 | 0.082 | -7.417 | 1.2E-13 | 1.4542E-12 | mt-Nd1        |
| ENSMUSG00000084416 | 367.041   | -0.612 | 0.138 | -4.430 | 9.4E-06 | 5.247E-05  | Rpl10a-ps1    |
| ENSMUSG00000078695 | 681.706   | -0.612 | 0.171 | -3.578 | 3.5E-04 | 0.00150102 | Cisd3         |
| ENSMUSG00000054079 | 2420.793  | -0.612 | 0.114 | -5.387 | 7.2E-08 | 5.2176E-07 | Utp18         |
| ENSMUSG00000056124 | 10679.126 | -0.612 | 0.116 | -5.288 | 1.2E-07 | 8.7368E-07 | B4galt6       |
| ENSMUSG00000035835 | 434.720   | -0.613 | 0.215 | -2.843 | 4.5E-03 | 0.01544752 | Plppr3        |
| ENSMUSG00000031907 | 1174.062  | -0.613 | 0.180 | -3.408 | 6.5E-04 | 0.00268316 | Zfp90         |
| ENSMUSG00000096699 | 199.044   | -0.613 | 0.163 | -3.760 | 1.7E-04 | 0.000779   | Rps19-ps4     |
| ENSMUSG00000027327 | 3994.146  | -0.613 | 0.085 | -7.201 | 6.0E-13 | 6.884E-12  | 1700037H04Rik |
| ENSMUSG00000035367 | 615.992   | -0.613 | 0.132 | -4.634 | 3.6E-06 | 2.1123E-05 | Rmi1          |
| ENSMUSG00000097669 | 142.768   | -0.614 | 0.234 | -2.623 | 8.7E-03 | 0.02777495 | Gm8649        |
| ENSMUSG00000091732 | 98.936    | -0.614 | 0.245 | -2.508 | 1.2E-02 | 0.03717341 | Gm17541       |
| ENSMUSG00000021177 | 836.985   | -0.614 | 0.175 | -3.512 | 4.4E-04 | 0.00188104 | Tdp1          |
| ENSMUSG00000038244 | 715.274   | -0.614 | 0.229 | -2.682 | 7.3E-03 | 0.02382401 | Mical2        |
| ENSMUSG00000028763 | 288.315   | -0.614 | 0.252 | -2.439 | 1.5E-02 | 0.04391407 | Hspg2         |
| ENSMUSG00000061983 | 1509.682  | -0.614 | 0.163 | -3.769 | 1.6E-04 | 0.00075208 | Rps12         |
| ENSMUSG00000031453 | 6696.542  | -0.614 | 0.100 | -6.121 | 9.3E-10 | 8.1879E-09 | Rasa3         |
| ENSMUSG00000020781 | 1015.212  | -0.615 | 0.201 | -3.065 | 2.2E-03 | 0.0080719  | Tsen54        |
| ENSMUSG00000031604 | 2903.670  | -0.616 | 0.118 | -5.201 | 2.0E-07 | 1.3648E-06 | Msmo1         |
| ENSMUSG00000062997 | 723.057   | -0.616 | 0.131 | -4.705 | 2.5E-06 | 1.5255E-05 | Rpl35         |
| ENSMUSG00000028910 | 1233.065  | -0.616 | 0.182 | -3.385 | 7.1E-04 | 0.00290281 | Mecr          |
| ENSMUSG00000087380 | 343.574   | -0.616 | 0.159 | -3.886 | 1.0E-04 | 0.00048283 | 2210408F21Rik |
| ENSMUSG00000064210 | 4917.313  | -0.617 | 0.138 | -4.459 | 8.2E-06 | 4.6182E-05 | Ano6          |
| ENSMUSG00000059070 | 15457.622 | -0.617 | 0.139 | -4.440 | 9.0E-06 | 5.0284E-05 | Rpl18         |
| ENSMUSG00000070692 | 145.285   | -0.617 | 0.224 | -2.750 | 6.0E-03 | 0.01992821 | Rps12-ps10    |
| ENSMUSG00000031826 | 1846.699  | -0.617 | 0.136 | -4.524 | 6.1E-06 | 3.4637E-05 | Usp10         |
| ENSMUSG00000074030 | 1475.990  | -0.618 | 0.158 | -3.904 | 9.4E-05 | 0.00044969 | Exoc8         |
| ENSMUSG00000023025 | 1481.692  | -0.618 | 0.153 | -4.039 | 5.4E-05 | 0.00026653 | Larp4         |
| ENSMUSG00000083429 | 118.851   | -0.618 | 0.226 | -2.738 | 6.2E-03 | 0.02056385 | Gm15198       |
| ENSMUSG00000031864 | 1113.999  | -0.619 | 0.140 | -4.425 | 9.6E-06 | 5.3411E-05 | Ints10        |
| ENSMUSG00000022559 | 2026.042  | -0.619 | 0.116 | -5.354 | 8.6E-08 | 6.2029E-07 | Fbxl6         |
| ENSMUSG00000024621 | 67896.828 | -0.620 | 0.100 | -6.205 | 5.5E-10 | 4.9177E-09 | Csflr         |
| ENSMUSG00000050192 | 329.880   | -0.620 | 0.244 | -2.544 | 1.1E-02 | 0.03394295 | Eif5a2        |
| ENSMUSG00000038982 | 632.034   | -0.621 | 0.158 | -3.916 | 9.0E-05 | 0.00043055 | Bloc1s5       |
| ENSMUSG00000034951 | 1337.965  | -0.621 | 0.136 | -4.570 | 4.9E-06 | 2.8212E-05 | Cog7          |
| ENSMUSG00000044986 | 377.217   | -0.622 | 0.233 | -2.669 | 7.6E-03 | 0.0246357  | Tst           |
| ENSMUSG00000021136 | 471.324   | -0.622 | 0.220 | -2.830 | 4.7E-03 | 0.01601787 | Smoc1         |
| ENSMUSG00000032518 | 5666.006  | -0.623 | 0.134 | -4.635 | 3.6E-06 | 2.1014E-05 | Rpsa          |
| ENSMUSG00000062353 | 248.024   | -0.623 | 0.176 | -3.538 | 4.0E-04 | 0.00172278 | Gm15772       |
| ENSMUSG00000020925 | 925.670   | -0.623 | 0.173 | -3.596 | 3.2E-04 | 0.0014068  | Ccdc43        |
| ENSMUSG00000051154 | 5274.360  | -0.623 | 0.077 | -8.047 | 8.5E-16 | 1.1811E-14 | Commdd3       |
| ENSMUSG00000015711 | 1230.878  | -0.624 | 0.135 | -4.618 | 3.9E-06 | 2.2751E-05 | Prune1        |
| ENSMUSG00000017670 | 4195.898  | -0.624 | 0.109 | -5.698 | 1.2E-08 | 9.5839E-08 | Elmo2         |
| ENSMUSG00000020823 | 5341.750  | -0.624 | 0.124 | -5.048 | 4.5E-07 | 2.9298E-06 | Sec14l1       |
| ENSMUSG00000029705 | 5530.661  | -0.624 | 0.070 | -8.954 | 3.4E-19 | 5.9361E-18 | Cux1          |
| ENSMUSG00000034175 | 991.194   | -0.624 | 0.137 | -4.555 | 5.3E-06 | 3.0191E-05 | Rhbdd3        |

|                    |           |        |       |        |         |            |               |
|--------------------|-----------|--------|-------|--------|---------|------------|---------------|
| ENSMUSG00000022620 | 1656.991  | -0.625 | 0.120 | -5.211 | 1.9E-07 | 1.295E-06  | Arsa          |
| ENSMUSG00000031819 | 1681.958  | -0.625 | 0.108 | -5.794 | 6.9E-09 | 5.5537E-08 | Emc8          |
| ENSMUSG00000029918 | 685.353   | -0.626 | 0.137 | -4.563 | 5.0E-06 | 2.9034E-05 | Mrps33        |
| ENSMUSG00000021978 | 1739.820  | -0.626 | 0.151 | -4.137 | 3.5E-05 | 0.00017879 | Extl3         |
| ENSMUSG00000027406 | 7129.784  | -0.626 | 0.081 | -7.731 | 1.1E-14 | 1.3735E-13 | Idh3b         |
| ENSMUSG00000069808 | 482.389   | -0.626 | 0.235 | -2.669 | 7.6E-03 | 0.02461718 | Tlcd3a        |
| ENSMUSG00000048668 | 565.594   | -0.627 | 0.211 | -2.965 | 3.0E-03 | 0.01087829 | Rhno1         |
| ENSMUSG00000028603 | 3106.601  | -0.627 | 0.081 | -7.702 | 1.3E-14 | 1.7278E-13 | Scp2          |
| ENSMUSG00000033943 | 1018.867  | -0.627 | 0.156 | -4.021 | 5.8E-05 | 0.00028638 | Mga           |
| ENSMUSG00000011831 | 1056.082  | -0.628 | 0.136 | -4.627 | 3.7E-06 | 2.1789E-05 | Evi5          |
| ENSMUSG00000081434 | 132.426   | -0.628 | 0.203 | -3.098 | 1.9E-03 | 0.00730418 | Gm14165       |
| ENSMUSG00000024287 | 1734.655  | -0.628 | 0.124 | -5.077 | 3.8E-07 | 2.537E-06  | Thoc1         |
| ENSMUSG00000005102 | 457.827   | -0.628 | 0.174 | -3.608 | 3.1E-04 | 0.00134669 | Eif2ak4       |
| ENSMUSG00000030083 | 1845.311  | -0.628 | 0.115 | -5.467 | 4.6E-08 | 3.4027E-07 | Abtb1         |
| ENSMUSG00000002825 | 815.913   | -0.628 | 0.196 | -3.215 | 1.3E-03 | 0.00506746 | Qtrt1         |
| ENSMUSG00000070343 | 355.454   | -0.629 | 0.174 | -3.613 | 3.0E-04 | 0.00132123 | Gm10288       |
| ENSMUSG00000052684 | 9890.861  | -0.629 | 0.082 | -7.691 | 1.5E-14 | 1.8799E-13 | Jun           |
| ENSMUSG00000061474 | 810.200   | -0.630 | 0.115 | -5.467 | 4.6E-08 | 3.3947E-07 | Mrps36        |
| ENSMUSG00000029676 | 592.791   | -0.631 | 0.190 | -3.313 | 9.2E-04 | 0.0036802  | Pot1a         |
| ENSMUSG00000029238 | 713.278   | -0.631 | 0.189 | -3.344 | 8.3E-04 | 0.00333024 | Clock         |
| ENSMUSG00000033862 | 418.791   | -0.631 | 0.215 | -2.939 | 3.3E-03 | 0.01175729 | Cdk10         |
| ENSMUSG00000081344 | 1221.572  | -0.632 | 0.174 | -3.636 | 2.8E-04 | 0.00122193 | Gm14303       |
| ENSMUSG00000022471 | 915.639   | -0.632 | 0.181 | -3.481 | 5.0E-04 | 0.00209225 | Xrcc6         |
| ENSMUSG00000022177 | 653.685   | -0.632 | 0.148 | -4.276 | 1.9E-05 | 0.00010108 | Haus4         |
| ENSMUSG00000044991 | 671.773   | -0.632 | 0.156 | -4.053 | 5.0E-05 | 0.00025213 | Shld1         |
| ENSMUSG00000063253 | 660.798   | -0.633 | 0.117 | -5.396 | 6.8E-08 | 4.9516E-07 | Scoc          |
| ENSMUSG00000020706 | 2672.294  | -0.633 | 0.109 | -5.781 | 7.4E-09 | 6.0051E-08 | Ftsj3         |
| ENSMUSG00000039615 | 2675.058  | -0.633 | 0.118 | -5.361 | 8.3E-08 | 5.9696E-07 | Stub1         |
| ENSMUSG00000020167 | 3298.693  | -0.633 | 0.123 | -5.162 | 2.4E-07 | 1.6653E-06 | Tcf3          |
| ENSMUSG00000061758 | 1680.367  | -0.634 | 0.128 | -4.951 | 7.4E-07 | 4.7222E-06 | Akr1b10       |
| ENSMUSG00000029270 | 1433.277  | -0.634 | 0.126 | -5.048 | 4.5E-07 | 2.922E-06  | Dipk1a        |
| ENSMUSG00000062397 | 8533.802  | -0.634 | 0.074 | -8.563 | 1.1E-17 | 1.7509E-16 | Zfp706        |
| ENSMUSG00000046671 | 5094.721  | -0.634 | 0.070 | -9.114 | 7.9E-20 | 1.422E-18  | Mtfr11        |
| ENSMUSG00000043664 | 1108.029  | -0.635 | 0.258 | -2.463 | 1.4E-02 | 0.04152819 | Tmem221       |
| ENSMUSG00000036565 | 3812.774  | -0.635 | 0.084 | -7.571 | 3.7E-14 | 4.6215E-13 | Ttyh3         |
| ENSMUSG00000078713 | 1341.350  | -0.635 | 0.122 | -5.210 | 1.9E-07 | 1.305E-06  | Tomm5         |
| ENSMUSG00000000489 | 495.612   | -0.635 | 0.259 | -2.453 | 1.4E-02 | 0.04245041 | Pdgbf         |
| ENSMUSG00000064373 | 49120.339 | -0.635 | 0.142 | -4.460 | 8.2E-06 | 4.5974E-05 | Selenop       |
| ENSMUSG00000032491 | 835.060   | -0.636 | 0.139 | -4.579 | 4.7E-06 | 2.7064E-05 | Nradd         |
| ENSMUSG00000016984 | 498.696   | -0.636 | 0.189 | -3.362 | 7.7E-04 | 0.0031274  | Etaa1         |
| ENSMUSG00000071644 | 4770.622  | -0.636 | 0.113 | -5.632 | 1.8E-08 | 1.3838E-07 | Eef1g         |
| ENSMUSG00000024654 | 889.563   | -0.637 | 0.180 | -3.542 | 4.0E-04 | 0.0016993  | Asrg11        |
| ENSMUSG00000037827 | 222.850   | -0.637 | 0.197 | -3.233 | 1.2E-03 | 0.00477999 | Gm5884        |
| ENSMUSG00000097585 | 136.809   | -0.637 | 0.263 | -2.420 | 1.6E-02 | 0.04605701 | E230029C05Rik |
| ENSMUSG00000030041 | 457.231   | -0.637 | 0.199 | -3.204 | 1.4E-03 | 0.00523838 | M1ap          |
| ENSMUSG00000032673 | 690.791   | -0.637 | 0.180 | -3.536 | 4.1E-04 | 0.00173315 | Prorsd1       |
| ENSMUSG00000010554 | 1007.028  | -0.638 | 0.120 | -5.323 | 1.0E-07 | 7.2948E-07 | Mettl16       |
| ENSMUSG00000045410 | 1124.261  | -0.638 | 0.137 | -4.656 | 3.2E-06 | 1.914E-05  | Akr1e1        |
| ENSMUSG00000027597 | 323.585   | -0.638 | 0.163 | -3.915 | 9.1E-05 | 0.00043257 | Ahey          |
| ENSMUSG00000029864 | 188.614   | -0.638 | 0.236 | -2.706 | 6.8E-03 | 0.02239993 | Gstk1         |
| ENSMUSG00000022338 | 1020.319  | -0.638 | 0.151 | -4.221 | 2.4E-05 | 0.00012708 | Eny2          |
| ENSMUSG00000023973 | 4586.353  | -0.639 | 0.079 | -8.054 | 8.0E-16 | 1.1187E-14 | Cnpy3         |

|                    |           |        |       |        |         |            |            |
|--------------------|-----------|--------|-------|--------|---------|------------|------------|
| ENSMUSG00000031068 | 2528.212  | -0.639 | 0.118 | -5.434 | 5.5E-08 | 4.0724E-07 | Glr3       |
| ENSMUSG00000028293 | 992.858   | -0.639 | 0.134 | -4.756 | 2.0E-06 | 1.1986E-05 | Slc35a1    |
| ENSMUSG00000033909 | 873.116   | -0.639 | 0.178 | -3.581 | 3.4E-04 | 0.00148038 | Usp36      |
| ENSMUSG00000024425 | 13801.500 | -0.640 | 0.076 | -8.435 | 3.3E-17 | 5.0541E-16 | Ndfip1     |
| ENSMUSG00000022742 | 1020.170  | -0.640 | 0.177 | -3.618 | 3.0E-04 | 0.00129959 | Cpox       |
| ENSMUSG00000026832 | 2362.443  | -0.640 | 0.129 | -4.962 | 7.0E-07 | 4.4732E-06 | Cytip      |
| ENSMUSG00000046186 | 286.154   | -0.640 | 0.238 | -2.693 | 7.1E-03 | 0.0231747  | Cd109      |
| ENSMUSG00000075279 | 358.387   | -0.641 | 0.213 | -3.011 | 2.6E-03 | 0.00950896 | Mrpl23-ps1 |
| ENSMUSG00000026615 | 6332.717  | -0.641 | 0.100 | -6.432 | 1.3E-10 | 1.2001E-09 | Eprs       |
| ENSMUSG00000027284 | 290.160   | -0.641 | 0.268 | -2.395 | 1.7E-02 | 0.04883449 | Cdan1      |
| ENSMUSG00000021754 | 3689.868  | -0.641 | 0.116 | -5.539 | 3.0E-08 | 2.3079E-07 | Map3k1     |
| ENSMUSG00000070565 | 346.437   | -0.642 | 0.262 | -2.452 | 1.4E-02 | 0.04261059 | Rasal2     |
| ENSMUSG00000030172 | 793.935   | -0.642 | 0.230 | -2.785 | 5.3E-03 | 0.0181151  | Erc1       |
| ENSMUSG00000040888 | 1838.367  | -0.642 | 0.097 | -6.618 | 3.6E-11 | 3.6172E-10 | Gfer       |
| ENSMUSG00000027332 | 1830.129  | -0.642 | 0.104 | -6.157 | 7.4E-10 | 6.6232E-09 | Ivd        |
| ENSMUSG00000027890 | 518.561   | -0.642 | 0.231 | -2.778 | 5.5E-03 | 0.01850588 | Gstm4      |
| ENSMUSG00000031399 | 1619.524  | -0.642 | 0.132 | -4.883 | 1.0E-06 | 6.5574E-06 | Fam3a      |
| ENSMUSG0000003420  | 9412.293  | -0.643 | 0.152 | -4.224 | 2.4E-05 | 0.00012505 | Fcgrt      |
| ENSMUSG00000037503 | 3890.501  | -0.643 | 0.116 | -5.538 | 3.1E-08 | 2.3165E-07 | Fam168b    |
| ENSMUSG00000044424 | 237.474   | -0.643 | 0.161 | -3.988 | 6.7E-05 | 0.00032658 | Gm9493     |
| ENSMUSG00000085099 | 283.787   | -0.644 | 0.179 | -3.603 | 3.2E-04 | 0.00137449 | Gm16288    |
| ENSMUSG00000019814 | 2169.379  | -0.644 | 0.111 | -5.816 | 6.0E-09 | 4.9317E-08 | Ltv1       |
| ENSMUSG00000031530 | 547.457   | -0.644 | 0.229 | -2.810 | 5.0E-03 | 0.0169497  | Dusp4      |
| ENSMUSG00000026356 | 3759.816  | -0.644 | 0.106 | -6.062 | 1.3E-09 | 1.1686E-08 | Dars       |
| ENSMUSG00000028124 | 35747.718 | -0.645 | 0.108 | -5.945 | 2.8E-09 | 2.3321E-08 | Gclm       |
| ENSMUSG00000069516 | #####     | -0.646 | 0.122 | -5.303 | 1.1E-07 | 8.091E-07  | Lyz2       |
| ENSMUSG00000060419 | 853.689   | -0.646 | 0.119 | -5.448 | 5.1E-08 | 3.7607E-07 | Rps16-ps2  |
| ENSMUSG00000036764 | 602.645   | -0.647 | 0.203 | -3.183 | 1.5E-03 | 0.00560436 | Dnajc12    |
| ENSMUSG00000019774 | 292.669   | -0.647 | 0.256 | -2.523 | 1.2E-02 | 0.03582374 | Mtrf11     |
| ENSMUSG00000040022 | 357.957   | -0.647 | 0.211 | -3.070 | 2.1E-03 | 0.00794477 | Rab11fip2  |
| ENSMUSG0000006445  | 583.965   | -0.647 | 0.252 | -2.572 | 1.0E-02 | 0.03155761 | Epha2      |
| ENSMUSG00000068264 | 1145.643  | -0.647 | 0.142 | -4.567 | 4.9E-06 | 2.8557E-05 | Ap5s1      |
| ENSMUSG00000092274 | 8327.264  | -0.648 | 0.122 | -5.307 | 1.1E-07 | 7.9373E-07 | Neat1      |
| ENSMUSG00000109511 | 4463.794  | -0.648 | 0.065 | -9.974 | 2.0E-23 | 4.2746E-22 | Nup62      |
| ENSMUSG00000074890 | 1132.194  | -0.648 | 0.175 | -3.713 | 2.1E-04 | 0.00092481 | Lcmt2      |
| ENSMUSG00000027937 | 4117.675  | -0.648 | 0.079 | -8.222 | 2.0E-16 | 2.9179E-15 | Jtb        |
| ENSMUSG00000025579 | 8817.859  | -0.649 | 0.126 | -5.155 | 2.5E-07 | 1.7252E-06 | Gaa        |
| ENSMUSG00000036620 | 4803.646  | -0.649 | 0.091 | -7.143 | 9.1E-13 | 1.028E-11  | Mgat4b     |
| ENSMUSG00000024645 | 614.738   | -0.649 | 0.163 | -3.991 | 6.6E-05 | 0.00032241 | Timm21     |
| ENSMUSG00000001674 | 1285.102  | -0.649 | 0.108 | -5.989 | 2.1E-09 | 1.81E-08   | Ddx18      |
| ENSMUSG00000024350 | 728.138   | -0.649 | 0.158 | -4.119 | 3.8E-05 | 0.000193   | Dnajc18    |
| ENSMUSG00000065979 | 1038.186  | -0.650 | 0.139 | -4.691 | 2.7E-06 | 1.6236E-05 | Cpped1     |
| ENSMUSG00000031171 | 1027.246  | -0.650 | 0.137 | -4.733 | 2.2E-06 | 1.3353E-05 | Ftsj1      |
| ENSMUSG00000020695 | 315.965   | -0.651 | 0.239 | -2.721 | 6.5E-03 | 0.02150207 | Mrc2       |
| ENSMUSG00000060510 | 637.102   | -0.651 | 0.191 | -3.409 | 6.5E-04 | 0.00266894 | Zfp266     |
| ENSMUSG00000038299 | 1965.671  | -0.651 | 0.124 | -5.232 | 1.7E-07 | 1.1642E-06 | Wdr36      |
| ENSMUSG00000105814 | 246.611   | -0.651 | 0.214 | -3.036 | 2.4E-03 | 0.00880183 | Mir703     |
| ENSMUSG00000028917 | 943.953   | -0.651 | 0.218 | -2.989 | 2.8E-03 | 0.01013722 | Plekhm2    |
| ENSMUSG00000075486 | 2284.244  | -0.652 | 0.098 | -6.638 | 3.2E-11 | 3.1683E-10 | Commd6     |
| ENSMUSG00000037876 | 1326.949  | -0.652 | 0.132 | -4.936 | 8.0E-07 | 5.0683E-06 | Jmjdlc     |
| ENSMUSG00000018697 | 1029.861  | -0.652 | 0.143 | -4.558 | 5.2E-06 | 2.9785E-05 | Aatf       |
| ENSMUSG00000024735 | 574.066   | -0.652 | 0.215 | -3.039 | 2.4E-03 | 0.00873492 | Prpf19     |

|                    |           |        |       |        |         |            |          |
|--------------------|-----------|--------|-------|--------|---------|------------|----------|
| ENSMUSG00000037278 | 1315.601  | -0.652 | 0.110 | -5.921 | 3.2E-09 | 2.6834E-08 | Tmem97   |
| ENSMUSG00000035203 | 5278.030  | -0.652 | 0.078 | -8.396 | 4.6E-17 | 7.0344E-16 | Epn1     |
| ENSMUSG00000041438 | 2245.569  | -0.653 | 0.139 | -4.688 | 2.8E-06 | 1.6513E-05 | Utp4     |
| ENSMUSG00000059878 | 1090.347  | -0.653 | 0.150 | -4.347 | 1.4E-05 | 7.4743E-05 | Zfp422   |
| ENSMUSG00000027425 | 1186.096  | -0.654 | 0.190 | -3.442 | 5.8E-04 | 0.00239407 | Kat14    |
| ENSMUSG00000024082 | 732.492   | -0.654 | 0.189 | -3.452 | 5.6E-04 | 0.002311   | Ndufaf7  |
| ENSMUSG00000026097 | 866.249   | -0.654 | 0.134 | -4.874 | 1.1E-06 | 6.8588E-06 | Ormdl1   |
| ENSMUSG00000041840 | 587.356   | -0.654 | 0.143 | -4.564 | 5.0E-06 | 2.8903E-05 | Haus1    |
| ENSMUSG00000024067 | 1827.135  | -0.655 | 0.099 | -6.591 | 4.4E-11 | 4.2993E-10 | Dpy30    |
| ENSMUSG00000028936 | 3879.452  | -0.655 | 0.132 | -4.951 | 7.4E-07 | 4.7222E-06 | Rpl22    |
| ENSMUSG00000032846 | 337.911   | -0.655 | 0.260 | -2.517 | 1.2E-02 | 0.03629078 | Zswim6   |
| ENSMUSG00000046330 | 4317.791  | -0.655 | 0.180 | -3.641 | 2.7E-04 | 0.00120127 | Rpl37a   |
| ENSMUSG00000061272 | 158.603   | -0.655 | 0.215 | -3.052 | 2.3E-03 | 0.00841111 | Gm14173  |
| ENSMUSG00000024639 | 5244.763  | -0.656 | 0.132 | -4.963 | 6.9E-07 | 4.4455E-06 | Gnaq     |
| ENSMUSG00000015087 | 2709.031  | -0.656 | 0.097 | -6.766 | 1.3E-11 | 1.3613E-10 | Rabl6    |
| ENSMUSG00000032370 | 1890.131  | -0.656 | 0.127 | -5.154 | 2.6E-07 | 1.7341E-06 | Lactb    |
| ENSMUSG00000040415 | 1029.922  | -0.657 | 0.173 | -3.792 | 1.5E-04 | 0.00069044 | Dtx3     |
| ENSMUSG00000051721 | 418.988   | -0.657 | 0.213 | -3.088 | 2.0E-03 | 0.00753246 | Wdcp     |
| ENSMUSG00000059713 | 718.578   | -0.657 | 0.208 | -3.162 | 1.6E-03 | 0.00598441 | Rcan3    |
| ENSMUSG00000020091 | 2764.605  | -0.657 | 0.110 | -5.987 | 2.1E-09 | 1.8286E-08 | Eif4ebp2 |
| ENSMUSG00000052889 | 4394.209  | -0.657 | 0.139 | -4.738 | 2.2E-06 | 1.3064E-05 | Prkcb    |
| ENSMUSG00000029376 | 446.789   | -0.657 | 0.159 | -4.123 | 3.7E-05 | 0.00018972 | Mthfd21  |
| ENSMUSG00000026181 | 782.834   | -0.657 | 0.190 | -3.457 | 5.5E-04 | 0.00227004 | Ppm1f    |
| ENSMUSG00000066551 | 2834.276  | -0.658 | 0.111 | -5.947 | 2.7E-09 | 2.311E-08  | Hmgb1    |
| ENSMUSG00000022560 | 1701.808  | -0.658 | 0.129 | -5.082 | 3.7E-07 | 2.4808E-06 | Slc52a2  |
| ENSMUSG00000034863 | 338.677   | -0.658 | 0.249 | -2.647 | 8.1E-03 | 0.02607354 | Ano8     |
| ENSMUSG00000030839 | 706.101   | -0.658 | 0.169 | -3.891 | 1.0E-04 | 0.00047235 | Sergef   |
| ENSMUSG00000061787 | 3647.496  | -0.658 | 0.157 | -4.185 | 2.8E-05 | 0.00014683 | Rps17    |
| ENSMUSG00000026127 | 4218.440  | -0.659 | 0.078 | -8.435 | 3.3E-17 | 5.0703E-16 | Imp4     |
| ENSMUSG00000027291 | 2224.934  | -0.659 | 0.150 | -4.381 | 1.2E-05 | 6.484E-05  | Vps39    |
| ENSMUSG00000028995 | 2247.425  | -0.659 | 0.132 | -4.995 | 5.9E-07 | 3.7987E-06 | Fam126a  |
| ENSMUSG00000001687 | 16658.909 | -0.659 | 0.078 | -8.430 | 3.5E-17 | 5.3037E-16 | Ubl3     |
| ENSMUSG00000036442 | 2363.860  | -0.659 | 0.121 | -5.461 | 4.7E-08 | 3.5046E-07 | Thap11   |
| ENSMUSG00000049760 | 3076.880  | -0.659 | 0.123 | -5.377 | 7.6E-08 | 5.5032E-07 | Micos13  |
| ENSMUSG00000024451 | 967.091   | -0.660 | 0.204 | -3.232 | 1.2E-03 | 0.00479156 | Arap3    |
| ENSMUSG00000061759 | 700.154   | -0.661 | 0.180 | -3.663 | 2.5E-04 | 0.0011092  | Armt1    |
| ENSMUSG00000047649 | 959.615   | -0.662 | 0.159 | -4.158 | 3.2E-05 | 0.00016456 | Cd3eap   |
| ENSMUSG00000072940 | 288.526   | -0.662 | 0.208 | -3.178 | 1.5E-03 | 0.00570802 | Gm10443  |
| ENSMUSG00000051978 | 490.448   | -0.662 | 0.248 | -2.674 | 7.5E-03 | 0.02430541 | Erich1   |
| ENSMUSG00000047264 | 1081.350  | -0.662 | 0.196 | -3.375 | 7.4E-04 | 0.00299617 | Zfp358   |
| ENSMUSG00000003316 | 6400.038  | -0.663 | 0.107 | -6.186 | 6.2E-10 | 5.5164E-09 | Glg1     |
| ENSMUSG00000021537 | 2165.652  | -0.663 | 0.109 | -6.079 | 1.2E-09 | 1.0578E-08 | Cetn3    |
| ENSMUSG00000030894 | 18129.032 | -0.664 | 0.096 | -6.925 | 4.3E-12 | 4.6684E-11 | Tpp1     |
| ENSMUSG00000042055 | 1273.723  | -0.664 | 0.148 | -4.488 | 7.2E-06 | 4.0671E-05 | Wdr11    |
| ENSMUSG00000046818 | 557.934   | -0.664 | 0.237 | -2.801 | 5.1E-03 | 0.01735097 | Ddit4l   |
| ENSMUSG00000043183 | 315.755   | -0.665 | 0.220 | -3.014 | 2.6E-03 | 0.00941384 | Sime1    |
| ENSMUSG00000037465 | 4609.595  | -0.665 | 0.106 | -6.241 | 4.3E-10 | 3.9505E-09 | Klf10    |
| ENSMUSG00000007892 | 12447.676 | -0.665 | 0.160 | -4.142 | 3.4E-05 | 0.00017498 | Rplp1    |
| ENSMUSG00000087598 | 356.866   | -0.666 | 0.270 | -2.469 | 1.4E-02 | 0.04084195 | Zfp111   |
| ENSMUSG00000023921 | 790.341   | -0.666 | 0.242 | -2.753 | 5.9E-03 | 0.01976469 | Mmut     |
| ENSMUSG00000027679 | 2169.586  | -0.666 | 0.092 | -7.232 | 4.8E-13 | 5.5219E-12 | Dnajc19  |
| ENSMUSG00000035697 | 6529.991  | -0.667 | 0.081 | -8.284 | 1.2E-16 | 1.7605E-15 | Arhgap45 |

|                    |            |        |       |         |         |            |               |
|--------------------|------------|--------|-------|---------|---------|------------|---------------|
| ENSMUSG00000025894 | 1311.741   | -0.667 | 0.134 | -4.970  | 6.7E-07 | 4.2922E-06 | Aasdhppt      |
| ENSMUSG00000028229 | 623.068    | -0.667 | 0.134 | -4.971  | 6.7E-07 | 4.2743E-06 | Rmdn1         |
| ENSMUSG00000027364 | 240.178    | -0.667 | 0.201 | -3.314  | 9.2E-04 | 0.00367598 | Usp50         |
| ENSMUSG00000051864 | 3460.954   | -0.667 | 0.128 | -5.208  | 1.9E-07 | 1.3141E-06 | Tbc1d22a      |
| ENSMUSG00000049300 | 656.258    | -0.668 | 0.185 | -3.600  | 3.2E-04 | 0.00138513 | Prmt6         |
| ENSMUSG00000029504 | 970.700    | -0.668 | 0.176 | -3.805  | 1.4E-04 | 0.00065782 | Ddx51         |
| ENSMUSG00000021607 | 3521.849   | -0.668 | 0.114 | -5.848  | 5.0E-09 | 4.1145E-08 | Mrpl36        |
| ENSMUSG00000043262 | 318.396    | -0.669 | 0.223 | -2.997  | 2.7E-03 | 0.00992158 | Uev1d         |
| ENSMUSG00000057363 | 598.297    | -0.669 | 0.152 | -4.410  | 1.0E-05 | 5.6916E-05 | Uxs1          |
| ENSMUSG00000028521 | 405.453    | -0.670 | 0.245 | -2.738  | 6.2E-03 | 0.02056385 | Slc35d1       |
| ENSMUSG00000009073 | 1616.998   | -0.671 | 0.136 | -4.942  | 7.8E-07 | 4.939E-06  | Nf2           |
| ENSMUSG00000028948 | 1575.537   | -0.671 | 0.151 | -4.455  | 8.4E-06 | 4.7002E-05 | No19          |
| ENSMUSG00000000740 | 20003.993  | -0.672 | 0.120 | -5.607  | 2.1E-08 | 1.5896E-07 | Rpl13         |
| ENSMUSG00000027076 | 1125.682   | -0.672 | 0.150 | -4.471  | 7.8E-06 | 4.39E-05   | Timm10        |
| ENSMUSG00000030614 | 1469.890   | -0.672 | 0.126 | -5.341  | 9.3E-08 | 6.6289E-07 | Tmem126b      |
| ENSMUSG00000026172 | 492.910    | -0.673 | 0.236 | -2.846  | 4.4E-03 | 0.01530434 | Bcs1l         |
| ENSMUSG00000029208 | 573.900    | -0.673 | 0.201 | -3.356  | 7.9E-04 | 0.003195   | Guf1          |
| ENSMUSG00000027272 | 892.440    | -0.673 | 0.151 | -4.470  | 7.8E-06 | 4.3969E-05 | Ubr1          |
| ENSMUSG00000038936 | 868.902    | -0.673 | 0.144 | -4.681  | 2.9E-06 | 1.7039E-05 | Sccpdh        |
| ENSMUSG00000031833 | 1614.060   | -0.674 | 0.141 | -4.787  | 1.7E-06 | 1.0358E-05 | Mast3         |
| ENSMUSG00000024180 | 1530.688   | -0.674 | 0.157 | -4.292  | 1.8E-05 | 9.4642E-05 | Pgap6         |
| ENSMUSG00000004207 | 169841.225 | -0.674 | 0.107 | -6.277  | 3.4E-10 | 3.1639E-09 | Psap          |
| ENSMUSG00000070047 | 545.508    | -0.675 | 0.262 | -2.577  | 1.0E-02 | 0.03116332 | Fat1          |
| ENSMUSG00000029916 | 579.049    | -0.675 | 0.170 | -3.983  | 6.8E-05 | 0.00033252 | Agk           |
| ENSMUSG00000024712 | 2810.143   | -0.675 | 0.112 | -6.022  | 1.7E-09 | 1.4837E-08 | Rfk           |
| ENSMUSG00000008035 | 1113.154   | -0.676 | 0.136 | -4.987  | 6.1E-07 | 3.9633E-06 | Mid1ip1       |
| ENSMUSG00000060121 | 511.573    | -0.676 | 0.176 | -3.850  | 1.2E-04 | 0.00055401 | Gemin2        |
| ENSMUSG00000029468 | 1002.560   | -0.677 | 0.190 | -3.559  | 3.7E-04 | 0.00159834 | P2rx7         |
| ENSMUSG00000040048 | 4004.412   | -0.678 | 0.113 | -5.996  | 2.0E-09 | 1.7358E-08 | Ndufb10       |
| ENSMUSG00000046364 | 3377.476   | -0.678 | 0.169 | -4.005  | 6.2E-05 | 0.00030463 | Rpl27a        |
| ENSMUSG00000071337 | 998.570    | -0.679 | 0.153 | -4.437  | 9.1E-06 | 5.071E-05  | Tia1          |
| ENSMUSG00000027324 | 190.970    | -0.679 | 0.281 | -2.416  | 1.6E-02 | 0.04645383 | Rpusd2        |
| ENSMUSG00000038880 | 331.973    | -0.679 | 0.264 | -2.575  | 1.0E-02 | 0.03133651 | Mrps34        |
| ENSMUSG00000092203 | 923.617    | -0.679 | 0.157 | -4.337  | 1.4E-05 | 7.8093E-05 | 1110038B12Rik |
| ENSMUSG00000028669 | 1954.591   | -0.679 | 0.116 | -5.877  | 4.2E-09 | 3.4756E-08 | Pithd1        |
| ENSMUSG00000015165 | 8604.102   | -0.679 | 0.058 | -11.679 | 1.6E-31 | 4.8699E-30 | Hnrnp1        |
| ENSMUSG00000030035 | 996.015    | -0.679 | 0.201 | -3.380  | 7.2E-04 | 0.00294679 | Wbp1          |
| ENSMUSG00000041225 | 1510.466   | -0.680 | 0.194 | -3.506  | 4.6E-04 | 0.00192116 | Arhgap12      |
| ENSMUSG00000082926 | 573.791    | -0.680 | 0.161 | -4.224  | 2.4E-05 | 0.00012507 | Gm8172        |
| ENSMUSG00000079184 | 1334.911   | -0.680 | 0.157 | -4.325  | 1.5E-05 | 8.2099E-05 | Mphosph8      |
| ENSMUSG00000047603 | 251.413    | -0.680 | 0.266 | -2.555  | 1.1E-02 | 0.03294566 | Zfp235        |
| ENSMUSG00000031077 | 1013.404   | -0.681 | 0.120 | -5.671  | 1.4E-08 | 1.1149E-07 | Fadd          |
| ENSMUSG00000061119 | 3310.874   | -0.681 | 0.106 | -6.399  | 1.6E-10 | 1.4824E-09 | Prcp          |
| ENSMUSG00000036944 | 301.605    | -0.681 | 0.244 | -2.787  | 5.3E-03 | 0.01804735 | Tmem71        |
| ENSMUSG00000020718 | 199.057    | -0.682 | 0.216 | -3.162  | 1.6E-03 | 0.00598968 | Polg2         |
| ENSMUSG00000056498 | 734.336    | -0.682 | 0.152 | -4.482  | 7.4E-06 | 4.1774E-05 | Tmem154       |
| ENSMUSG00000022472 | 2705.448   | -0.682 | 0.106 | -6.443  | 1.2E-10 | 1.1181E-09 | Desi1         |
| ENSMUSG00000021631 | 63.923     | -0.684 | 0.284 | -2.404  | 1.6E-02 | 0.04785794 | Mrps36-ps1    |
| ENSMUSG00000097679 | 737.677    | -0.684 | 0.157 | -4.347  | 1.4E-05 | 7.4706E-05 | Rps19-ps5     |
| ENSMUSG00000020153 | 4892.704   | -0.684 | 0.089 | -7.689  | 1.5E-14 | 1.9034E-13 | Ndufs7        |
| ENSMUSG00000022150 | 17568.681  | -0.684 | 0.213 | -3.216  | 1.3E-03 | 0.00504951 | Dab2          |
| ENSMUSG00000040520 | 550.153    | -0.684 | 0.192 | -3.572  | 3.5E-04 | 0.00153055 | Manea         |



|                    |           |        |       |        |         |            |          |
|--------------------|-----------|--------|-------|--------|---------|------------|----------|
| ENSMUSG00000030421 | 2097.716  | -0.684 | 0.113 | -6.065 | 1.3E-09 | 1.1489E-08 | Uri1     |
| ENSMUSG00000082062 | 31561.829 | -0.685 | 0.085 | -8.044 | 8.7E-16 | 1.2189E-14 | Ftl2-ps  |
| ENSMUSG00000060938 | 6010.458  | -0.685 | 0.135 | -5.072 | 3.9E-07 | 2.5962E-06 | Rpl26    |
| ENSMUSG00000030579 | 62414.926 | -0.685 | 0.101 | -6.747 | 1.5E-11 | 1.5364E-10 | Tyrobp   |
| ENSMUSG00000078193 | 677.647   | -0.685 | 0.164 | -4.184 | 2.9E-05 | 0.0001478  | Gm2000   |
| ENSMUSG00000078517 | 3135.971  | -0.685 | 0.098 | -7.022 | 2.2E-12 | 2.4042E-11 | Emc1     |
| ENSMUSG00000020388 | 5468.081  | -0.685 | 0.095 | -7.187 | 6.6E-13 | 7.6178E-12 | Pdlim4   |
| ENSMUSG00000014551 | 1752.436  | -0.685 | 0.088 | -7.799 | 6.2E-15 | 8.1546E-14 | Mrps25   |
| ENSMUSG00000045679 | 4213.729  | -0.686 | 0.108 | -6.368 | 1.9E-10 | 1.799E-09  | Pqlc3    |
| ENSMUSG00000071266 | 263.650   | -0.686 | 0.211 | -3.255 | 1.1E-03 | 0.00446259 | Zfp946   |
| ENSMUSG00000020460 | 6425.984  | -0.686 | 0.163 | -4.207 | 2.6E-05 | 0.00013458 | Rps27a   |
| ENSMUSG00000024294 | 2018.825  | -0.686 | 0.117 | -5.854 | 4.8E-09 | 3.9597E-08 | Mib1     |
| ENSMUSG00000083621 | 196.411   | -0.686 | 0.183 | -3.740 | 1.8E-04 | 0.00083706 | Gm14586  |
| ENSMUSG00000036561 | 560.660   | -0.686 | 0.219 | -3.133 | 1.7E-03 | 0.00654921 | Ppp6r2   |
| ENSMUSG00000030243 | 527.246   | -0.687 | 0.207 | -3.324 | 8.9E-04 | 0.00354329 | Recq1    |
| ENSMUSG00000033295 | 886.392   | -0.687 | 0.164 | -4.182 | 2.9E-05 | 0.00014885 | Ptprf    |
| ENSMUSG00000053581 | 2402.970  | -0.687 | 0.145 | -4.729 | 2.3E-06 | 1.3667E-05 | Zfand2a  |
| ENSMUSG00000020777 | 2512.177  | -0.687 | 0.102 | -6.728 | 1.7E-11 | 1.758E-10  | Acox1    |
| ENSMUSG00000032238 | 631.159   | -0.687 | 0.169 | -4.056 | 5.0E-05 | 0.0002495  | Rora     |
| ENSMUSG00000049517 | 5710.005  | -0.687 | 0.172 | -4.006 | 6.2E-05 | 0.00030453 | Rps23    |
| ENSMUSG00000032485 | 1347.932  | -0.688 | 0.131 | -5.265 | 1.4E-07 | 9.838E-07  | Scap     |
| ENSMUSG00000022102 | 7234.496  | -0.689 | 0.159 | -4.337 | 1.4E-05 | 7.8076E-05 | Dok2     |
| ENSMUSG00000006728 | 7797.538  | -0.689 | 0.070 | -9.773 | 1.5E-22 | 3.0239E-21 | Cdk4     |
| ENSMUSG00000048351 | 961.529   | -0.689 | 0.186 | -3.700 | 2.2E-04 | 0.00096871 | Coa7     |
| ENSMUSG00000040464 | 349.327   | -0.689 | 0.193 | -3.580 | 3.4E-04 | 0.00148938 | Gtpbp10  |
| ENSMUSG00000039740 | 1138.337  | -0.689 | 0.214 | -3.225 | 1.3E-03 | 0.00489641 | Alg2     |
| ENSMUSG00000028927 | 222.933   | -0.689 | 0.251 | -2.752 | 5.9E-03 | 0.01981051 | Padi2    |
| ENSMUSG00000040212 | 17616.379 | -0.689 | 0.101 | -6.849 | 7.4E-12 | 7.7893E-11 | Emp3     |
| ENSMUSG00000044465 | 1117.915  | -0.689 | 0.190 | -3.626 | 2.9E-04 | 0.00126833 | Fam160a2 |
| ENSMUSG00000002416 | 485.390   | -0.690 | 0.146 | -4.724 | 2.3E-06 | 1.3954E-05 | Ndufb2   |
| ENSMUSG00000037395 | 758.806   | -0.690 | 0.160 | -4.324 | 1.5E-05 | 8.2638E-05 | Rcor3    |
| ENSMUSG00000074129 | 302.262   | -0.690 | 0.188 | -3.674 | 2.4E-04 | 0.00106441 | Rpl13a   |
| ENSMUSG00000038195 | 203.655   | -0.690 | 0.278 | -2.485 | 1.3E-02 | 0.03933193 | Rilp     |
| ENSMUSG00000071547 | 6862.591  | -0.690 | 0.102 | -6.773 | 1.3E-11 | 1.2972E-10 | Nt5dc2   |
| ENSMUSG00000022792 | 1765.221  | -0.691 | 0.094 | -7.353 | 1.9E-13 | 2.3295E-12 | Yars2    |
| ENSMUSG00000007050 | 1830.549  | -0.691 | 0.101 | -6.834 | 8.3E-12 | 8.6565E-11 | Lsm2     |
| ENSMUSG00000025260 | 2479.081  | -0.691 | 0.124 | -5.584 | 2.4E-08 | 1.8086E-07 | Hsd17b10 |
| ENSMUSG00000033809 | 2312.308  | -0.692 | 0.111 | -6.241 | 4.4E-10 | 3.951E-09  | Alg3     |
| ENSMUSG00000037740 | 2404.389  | -0.692 | 0.097 | -7.157 | 8.3E-13 | 9.3805E-12 | Mrps26   |
| ENSMUSG00000034321 | 1965.254  | -0.692 | 0.124 | -5.577 | 2.4E-08 | 1.8706E-07 | Exosc1   |
| ENSMUSG00000035448 | 609.195   | -0.693 | 0.235 | -2.946 | 3.2E-03 | 0.01150533 | Ccr3     |
| ENSMUSG00000005534 | 467.358   | -0.693 | 0.210 | -3.295 | 9.8E-04 | 0.00391087 | Insr     |
| ENSMUSG00000056310 | 1175.672  | -0.693 | 0.152 | -4.565 | 5.0E-06 | 2.8762E-05 | Tywl     |
| ENSMUSG00000028677 | 2700.366  | -0.693 | 0.130 | -5.350 | 8.8E-08 | 6.3226E-07 | Rnf220   |
| ENSMUSG00000028104 | 550.256   | -0.693 | 0.172 | -4.040 | 5.3E-05 | 0.00026529 | Polr3gl  |
| ENSMUSG00000029998 | 4119.001  | -0.693 | 0.127 | -5.440 | 5.3E-08 | 3.9413E-07 | Pcyox1   |
| ENSMUSG00000113756 | 79.686    | -0.693 | 0.273 | -2.537 | 1.1E-02 | 0.03451757 | Gm18025  |
| ENSMUSG00000020525 | 802.214   | -0.694 | 0.163 | -4.259 | 2.0E-05 | 0.00010816 | Ppm1d    |
| ENSMUSG00000022248 | 671.326   | -0.694 | 0.134 | -5.176 | 2.3E-07 | 1.5493E-06 | Rad1     |
| ENSMUSG00000020547 | 1926.673  | -0.694 | 0.137 | -5.081 | 3.8E-07 | 2.4881E-06 | Bzw2     |
| ENSMUSG00000030583 | 238.313   | -0.694 | 0.261 | -2.658 | 7.9E-03 | 0.02538025 | Sipa113  |
| ENSMUSG00000049755 | 816.820   | -0.695 | 0.195 | -3.565 | 3.6E-04 | 0.00156477 | Zfp672   |

|                     |           |        |       |        |         |            |               |
|---------------------|-----------|--------|-------|--------|---------|------------|---------------|
| ENSMUSG00000024037  | 1219.981  | -0.696 | 0.162 | -4.306 | 1.7E-05 | 8.9144E-05 | Wdr4          |
| ENSMUSG00000019849  | 3749.102  | -0.696 | 0.131 | -5.329 | 9.9E-08 | 7.0501E-07 | Prep          |
| ENSMUSG00000001524  | 1291.803  | -0.697 | 0.157 | -4.444 | 8.8E-06 | 4.9348E-05 | Gtf2h4        |
| ENSMUSG00000079215  | 831.265   | -0.698 | 0.154 | -4.540 | 5.6E-06 | 3.2281E-05 | Zfp664        |
| ENSMUSG00000019952  | 457.483   | -0.698 | 0.247 | -2.825 | 4.7E-03 | 0.01626237 | Poc1b         |
| ENSMUSG00000027963  | 768.816   | -0.699 | 0.174 | -4.027 | 5.7E-05 | 0.00028    | Extl2         |
| ENSMUSG00000060803  | 4837.814  | -0.699 | 0.133 | -5.253 | 1.5E-07 | 1.046E-06  | Gstp1         |
| ENSMUSG00000028710  | 465.122   | -0.699 | 0.128 | -5.466 | 4.6E-08 | 3.4232E-07 | Atpaf1        |
| ENSMUSG00000006288  | 1784.386  | -0.699 | 0.098 | -7.134 | 9.8E-13 | 1.0989E-11 | Ttc5          |
| ENSMUSG00000070939  | 1162.738  | -0.699 | 0.150 | -4.668 | 3.0E-06 | 1.8061E-05 | Tgfbra1       |
| ENSMUSG00000028863  | 980.407   | -0.699 | 0.130 | -5.397 | 6.8E-08 | 4.9393E-07 | Meaf6         |
| ENSMUSG00000022820  | 467.835   | -0.700 | 0.185 | -3.777 | 1.6E-04 | 0.00073031 | Ndufb4        |
| ENSMUSG00000005871  | 404.436   | -0.701 | 0.199 | -3.521 | 4.3E-04 | 0.00182419 | Apc           |
| ENSMUSG000000113061 | 116.426   | -0.701 | 0.211 | -3.327 | 8.8E-04 | 0.00351149 | Rps18-ps5     |
| ENSMUSG00000025794  | 10345.462 | -0.701 | 0.100 | -6.994 | 2.7E-12 | 2.9209E-11 | Rpl14         |
| ENSMUSG00000039952  | 2313.575  | -0.702 | 0.164 | -4.272 | 1.9E-05 | 0.00010251 | Dag1          |
| ENSMUSG00000067847  | 3420.226  | -0.702 | 0.150 | -4.666 | 3.1E-06 | 1.8283E-05 | Romo1         |
| ENSMUSG00000005225  | 436.097   | -0.702 | 0.191 | -3.682 | 2.3E-04 | 0.00103554 | Plekha8       |
| ENSMUSG00000026856  | 1926.085  | -0.702 | 0.203 | -3.453 | 5.5E-04 | 0.00230266 | Dolpp1        |
| ENSMUSG00000037761  | 988.778   | -0.702 | 0.150 | -4.683 | 2.8E-06 | 1.6894E-05 | Actr5         |
| ENSMUSG00000042729  | 2319.320  | -0.702 | 0.132 | -5.312 | 1.1E-07 | 7.6898E-07 | Wdr74         |
| ENSMUSG00000040945  | 955.272   | -0.702 | 0.235 | -2.986 | 2.8E-03 | 0.01025356 | Rcc2          |
| ENSMUSG00000057130  | 1099.975  | -0.703 | 0.169 | -4.159 | 3.2E-05 | 0.00016331 | Txn14a        |
| ENSMUSG00000023953  | 633.671   | -0.703 | 0.181 | -3.893 | 9.9E-05 | 0.00046982 | Polh          |
| ENSMUSG00000005687  | 3113.975  | -0.703 | 0.076 | -9.245 | 2.3E-20 | 4.3402E-19 | Bcas2         |
| ENSMUSG00000032030  | 1923.198  | -0.704 | 0.108 | -6.545 | 5.9E-11 | 5.7986E-10 | Cul5          |
| ENSMUSG00000057133  | 519.894   | -0.704 | 0.184 | -3.818 | 1.3E-04 | 0.0006266  | Chd6          |
| ENSMUSG00000035601  | 421.897   | -0.704 | 0.264 | -2.665 | 7.7E-03 | 0.02489525 | Trmt10b       |
| ENSMUSG00000002885  | 2507.841  | -0.705 | 0.117 | -6.000 | 2.0E-09 | 1.6912E-08 | Adgre5        |
| ENSMUSG00000058392  | 1156.829  | -0.705 | 0.164 | -4.292 | 1.8E-05 | 9.432E-05  | Rrp1b         |
| ENSMUSG00000030789  | 713.986   | -0.705 | 0.252 | -2.801 | 5.1E-03 | 0.01735097 | Itgax         |
| ENSMUSG00000032834  | 568.668   | -0.706 | 0.241 | -2.922 | 3.5E-03 | 0.01231433 | Pwp2          |
| ENSMUSG00000029507  | 1237.816  | -0.706 | 0.120 | -5.883 | 4.0E-09 | 3.3492E-08 | Pus1          |
| ENSMUSG00000025041  | 1921.719  | -0.706 | 0.102 | -6.933 | 4.1E-12 | 4.4297E-11 | Nt5c2         |
| ENSMUSG00000020918  | 2420.672  | -0.706 | 0.144 | -4.913 | 9.0E-07 | 5.6697E-06 | Kat2a         |
| ENSMUSG00000080893  | 118.498   | -0.707 | 0.242 | -2.916 | 3.5E-03 | 0.01252541 | Ndufa12-ps    |
| ENSMUSG00000028636  | 748.407   | -0.707 | 0.151 | -4.689 | 2.8E-06 | 1.6449E-05 | Ppcs          |
| ENSMUSG00000047635  | 401.287   | -0.707 | 0.247 | -2.869 | 4.1E-03 | 0.01434179 | 2810006K23Rik |
| ENSMUSG00000106696  | 365.993   | -0.708 | 0.230 | -3.074 | 2.1E-03 | 0.00785286 | Gm42729       |
| ENSMUSG00000017764  | 754.857   | -0.708 | 0.146 | -4.844 | 1.3E-06 | 7.9194E-06 | Zswim1        |
| ENSMUSG00000022111  | 1433.609  | -0.708 | 0.117 | -6.041 | 1.5E-09 | 1.3296E-08 | Uchl3         |
| ENSMUSG00000103696  | 119.672   | -0.708 | 0.296 | -2.389 | 1.7E-02 | 0.04959986 | Gm37531       |
| ENSMUSG00000023191  | 573.423   | -0.709 | 0.186 | -3.805 | 1.4E-04 | 0.0006566  | P3h3          |
| ENSMUSG00000050989  | 573.364   | -0.709 | 0.275 | -2.576 | 1.0E-02 | 0.03117151 | Selenon       |
| ENSMUSG00000063856  | 38271.817 | -0.710 | 0.102 | -6.937 | 4.0E-12 | 4.3133E-11 | Gpx1          |
| ENSMUSG00000084383  | 69.084    | -0.710 | 0.284 | -2.499 | 1.2E-02 | 0.03796825 | Gm13370       |
| ENSMUSG00000072692  | 1205.376  | -0.710 | 0.141 | -5.026 | 5.0E-07 | 3.2654E-06 | Rpl37rt       |
| ENSMUSG00000024104  | 3820.211  | -0.710 | 0.081 | -8.810 | 1.3E-18 | 2.1029E-17 | Washc2        |
| ENSMUSG00000036932  | 1585.424  | -0.711 | 0.128 | -5.560 | 2.7E-08 | 2.0618E-07 | Aifm1         |
| ENSMUSG00000067567  | 263.948   | -0.711 | 0.265 | -2.679 | 7.4E-03 | 0.02397515 | Hdac8         |
| ENSMUSG00000022476  | 1127.658  | -0.712 | 0.116 | -6.151 | 7.7E-10 | 6.8433E-09 | Polr3h        |
| ENSMUSG00000042331  | 3327.697  | -0.713 | 0.116 | -6.127 | 8.9E-10 | 7.9249E-09 | Specc1        |

|                     |           |        |       |         |         |            |               |
|---------------------|-----------|--------|-------|---------|---------|------------|---------------|
| ENSMUSG00000053898  | 4683.480  | -0.713 | 0.070 | -10.238 | 1.3E-24 | 3.044E-23  | Ech1          |
| ENSMUSG00000002289  | 5455.663  | -0.714 | 0.139 | -5.144  | 2.7E-07 | 1.8241E-06 | Angptl4       |
| ENSMUSG000000034544 | 1629.481  | -0.714 | 0.127 | -5.624  | 1.9E-08 | 1.446E-07  | Rsrc1         |
| ENSMUSG000000038175 | 3139.223  | -0.715 | 0.161 | -4.439  | 9.0E-06 | 5.041E-05  | Myliip        |
| ENSMUSG000000039033 | 399.041   | -0.715 | 0.248 | -2.880  | 4.0E-03 | 0.01389843 | Tasp1         |
| ENSMUSG000000068262 | 88.226    | -0.715 | 0.259 | -2.764  | 5.7E-03 | 0.0191578  | Gm5879        |
| ENSMUSG000000044018 | 1601.481  | -0.715 | 0.123 | -5.821  | 5.9E-09 | 4.7951E-08 | Mrpl50        |
| ENSMUSG000000037573 | 702.197   | -0.715 | 0.129 | -5.563  | 2.7E-08 | 2.0242E-07 | Tob1          |
| ENSMUSG000000058799 | 3006.229  | -0.716 | 0.096 | -7.491  | 6.9E-14 | 8.4298E-13 | Nap111        |
| ENSMUSG000000058997 | 544.801   | -0.716 | 0.192 | -3.725  | 2.0E-04 | 0.00088307 | Vwa8          |
| ENSMUSG000000039640 | 4608.907  | -0.716 | 0.100 | -7.153  | 8.5E-13 | 9.6293E-12 | Mrpl12        |
| ENSMUSG00000001419  | 2561.275  | -0.716 | 0.136 | -5.249  | 1.5E-07 | 1.0691E-06 | Mef2d         |
| ENSMUSG000000042712 | 3937.075  | -0.716 | 0.110 | -6.528  | 6.7E-11 | 6.4937E-10 | Tceal9        |
| ENSMUSG000000039182 | 672.228   | -0.717 | 0.147 | -4.862  | 1.2E-06 | 7.2535E-06 | AW209491      |
| ENSMUSG000000071419 | 210.249   | -0.717 | 0.185 | -3.867  | 1.1E-04 | 0.00051952 | Rps15-ps2     |
| ENSMUSG000000042210 | 354.885   | -0.717 | 0.208 | -3.452  | 5.6E-04 | 0.00231023 | Abhd14a       |
| ENSMUSG000000042215 | 602.822   | -0.718 | 0.192 | -3.733  | 1.9E-04 | 0.00085906 | Bag2          |
| ENSMUSG000000003429 | 6974.443  | -0.718 | 0.072 | -10.028 | 1.2E-23 | 2.5051E-22 | Rps11         |
| ENSMUSG000000030432 | 3265.596  | -0.718 | 0.158 | -4.538  | 5.7E-06 | 3.2525E-05 | Rpl28         |
| ENSMUSG000000025465 | 3323.929  | -0.719 | 0.091 | -7.886  | 3.1E-15 | 4.2083E-14 | Echs1         |
| ENSMUSG000000026385 | 7440.027  | -0.719 | 0.102 | -7.066  | 1.6E-12 | 1.7687E-11 | Dbi           |
| ENSMUSG000000074754 | 403.659   | -0.719 | 0.181 | -3.978  | 6.9E-05 | 0.00033818 | Smim26        |
| ENSMUSG000000022394 | 1127.799  | -0.720 | 0.142 | -5.078  | 3.8E-07 | 2.5247E-06 | L3mbtl2       |
| ENSMUSG000000091264 | 939.510   | -0.720 | 0.148 | -4.857  | 1.2E-06 | 7.4417E-06 | Smim13        |
| ENSMUSG000000040550 | 1798.116  | -0.720 | 0.116 | -6.229  | 4.7E-10 | 4.2386E-09 | Otud6b        |
| ENSMUSG000000008450 | 1117.940  | -0.720 | 0.117 | -6.149  | 7.8E-10 | 6.9373E-09 | Nutf2         |
| ENSMUSG000000032279 | 3808.171  | -0.721 | 0.101 | -7.127  | 1.0E-12 | 1.15E-11   | Idh3a         |
| ENSMUSG000000087201 | 238.917   | -0.721 | 0.280 | -2.574  | 1.0E-02 | 0.03135898 | Gm15261       |
| ENSMUSG000000113555 | 370.608   | -0.721 | 0.199 | -3.621  | 2.9E-04 | 0.00128687 | Gm10095       |
| ENSMUSG000000027198 | 3247.045  | -0.721 | 0.136 | -5.296  | 1.2E-07 | 8.3758E-07 | Ext2          |
| ENSMUSG000000090015 | 198.313   | -0.721 | 0.299 | -2.410  | 1.6E-02 | 0.04719068 | Gm15446       |
| ENSMUSG000000024991 | 8186.378  | -0.721 | 0.094 | -7.672  | 1.7E-14 | 2.1651E-13 | Eif3a         |
| ENSMUSG000000069729 | 1634.116  | -0.722 | 0.151 | -4.776  | 1.8E-06 | 1.0932E-05 | Arid1b        |
| ENSMUSG000000066037 | 2170.273  | -0.723 | 0.101 | -7.140  | 9.3E-13 | 1.0492E-11 | Hnrnpr        |
| ENSMUSG000000039474 | 710.878   | -0.723 | 0.201 | -3.596  | 3.2E-04 | 0.0014064  | Wfs1          |
| ENSMUSG000000038506 | 724.795   | -0.723 | 0.189 | -3.835  | 1.3E-04 | 0.00058765 | Dcun1d2       |
| ENSMUSG000000090124 | 1776.483  | -0.723 | 0.098 | -7.392  | 1.4E-13 | 1.7458E-12 | Ugt1a7c       |
| ENSMUSG000000071078 | 220.418   | -0.723 | 0.172 | -4.201  | 2.7E-05 | 0.00013769 | Nr2c2ap       |
| ENSMUSG000000052384 | 15643.321 | -0.724 | 0.111 | -6.494  | 8.4E-11 | 8.059E-10  | Nrros         |
| ENSMUSG000000018102 | 2326.485  | -0.724 | 0.162 | -4.467  | 7.9E-06 | 4.453E-05  | H2bc4         |
| ENSMUSG000000090137 | 339.255   | -0.724 | 0.184 | -3.934  | 8.3E-05 | 0.00040109 | Uba52         |
| ENSMUSG000000058355 | 3285.524  | -0.725 | 0.107 | -6.795  | 1.1E-11 | 1.1223E-10 | Abce1         |
| ENSMUSG000000031984 | 1701.037  | -0.725 | 0.116 | -6.246  | 4.2E-10 | 3.8366E-09 | 2810004N23Rik |
| ENSMUSG000000083757 | 298.381   | -0.725 | 0.195 | -3.714  | 2.0E-04 | 0.00091941 | Rps15a-ps4    |
| ENSMUSG000000036339 | 747.466   | -0.726 | 0.166 | -4.358  | 1.3E-05 | 7.1595E-05 | Tmem260       |
| ENSMUSG000000010054 | 1134.590  | -0.726 | 0.123 | -5.915  | 3.3E-09 | 2.7858E-08 | Tusc2         |
| ENSMUSG000000056459 | 450.259   | -0.726 | 0.208 | -3.492  | 4.8E-04 | 0.00201458 | Zbtb25        |
| ENSMUSG000000074582 | 1055.670  | -0.726 | 0.126 | -5.756  | 8.6E-09 | 6.9204E-08 | Arfgef2       |
| ENSMUSG000000033222 | 570.353   | -0.726 | 0.246 | -2.955  | 3.1E-03 | 0.01121818 | Ttf2          |
| ENSMUSG000000029254 | 1942.715  | -0.726 | 0.169 | -4.285  | 1.8E-05 | 9.7164E-05 | Stap1         |
| ENSMUSG000000020163 | 6571.843  | -0.727 | 0.150 | -4.848  | 1.2E-06 | 7.7852E-06 | Uqcr11        |
| ENSMUSG000000053411 | 179.661   | -0.727 | 0.290 | -2.504  | 1.2E-02 | 0.03751073 | Cbx7          |

|                    |           |        |       |         |         |            |               |
|--------------------|-----------|--------|-------|---------|---------|------------|---------------|
| ENSMUSG00000039199 | 310.396   | -0.727 | 0.246 | -2.959  | 3.1E-03 | 0.01107849 | Zdhhc1        |
| ENSMUSG00000068744 | 466.862   | -0.727 | 0.191 | -3.808  | 1.4E-04 | 0.0006502  | Psrc1         |
| ENSMUSG00000036693 | 2328.540  | -0.727 | 0.116 | -6.249  | 4.1E-10 | 3.7554E-09 | Nop14         |
| ENSMUSG00000000085 | 773.314   | -0.727 | 0.144 | -5.039  | 4.7E-07 | 3.0577E-06 | Scmh1         |
| ENSMUSG00000055485 | 418.728   | -0.727 | 0.277 | -2.628  | 8.6E-03 | 0.02741878 | Soga1         |
| ENSMUSG00000049411 | 621.175   | -0.728 | 0.210 | -3.458  | 5.4E-04 | 0.00226747 | Tmem241       |
| ENSMUSG00000038628 | 2248.296  | -0.728 | 0.100 | -7.267  | 3.7E-13 | 4.3151E-12 | Polr3k        |
| ENSMUSG00000008683 | 4731.821  | -0.728 | 0.163 | -4.455  | 8.4E-06 | 4.7039E-05 | Rps15a        |
| ENSMUSG00000021033 | 574.860   | -0.728 | 0.157 | -4.650  | 3.3E-06 | 1.9696E-05 | Gstz1         |
| ENSMUSG00000015759 | 2894.161  | -0.729 | 0.093 | -7.808  | 5.8E-15 | 7.5949E-14 | Cnih1         |
| ENSMUSG00000054814 | 541.901   | -0.729 | 0.197 | -3.697  | 2.2E-04 | 0.00097953 | Usp46         |
| ENSMUSG00000003346 | 5834.005  | -0.729 | 0.123 | -5.938  | 2.9E-09 | 2.4358E-08 | Abhd17a       |
| ENSMUSG00000035595 | 382.013   | -0.729 | 0.249 | -2.931  | 3.4E-03 | 0.01202496 | Fam174c       |
| ENSMUSG00000037936 | 4524.459  | -0.729 | 0.093 | -7.818  | 5.4E-15 | 7.0836E-14 | Scarb1        |
| ENSMUSG00000015776 | 1048.993  | -0.730 | 0.153 | -4.782  | 1.7E-06 | 1.0629E-05 | Med22         |
| ENSMUSG00000006191 | 912.958   | -0.730 | 0.167 | -4.365  | 1.3E-05 | 6.9394E-05 | Cdkal1        |
| ENSMUSG00000051989 | 1104.139  | -0.730 | 0.148 | -4.945  | 7.6E-07 | 4.8549E-06 | Smim11        |
| ENSMUSG00000007777 | 1587.816  | -0.731 | 0.110 | -6.661  | 2.7E-11 | 2.7271E-10 | 0610009B22Rik |
| ENSMUSG00000029060 | 1650.756  | -0.731 | 0.179 | -4.087  | 4.4E-05 | 0.0002202  | Mib2          |
| ENSMUSG00000016087 | 5268.512  | -0.731 | 0.104 | -7.040  | 1.9E-12 | 2.1218E-11 | Fli1          |
| ENSMUSG00000026377 | 2774.507  | -0.731 | 0.148 | -4.943  | 7.7E-07 | 4.9132E-06 | Nifk          |
| ENSMUSG00000026457 | 17636.974 | -0.731 | 0.061 | -11.890 | 1.3E-32 | 4.2183E-31 | Adipor1       |
| ENSMUSG00000067925 | 197.988   | -0.731 | 0.296 | -2.473  | 1.3E-02 | 0.04049788 | Rtl8a         |
| ENSMUSG00000039656 | 4137.231  | -0.732 | 0.089 | -8.218  | 2.1E-16 | 3.008E-15  | Rxrb          |
| ENSMUSG00000060032 | 7902.546  | -0.732 | 0.106 | -6.924  | 4.4E-12 | 4.7076E-11 | H2aj          |
| ENSMUSG00000037461 | 1196.263  | -0.732 | 0.173 | -4.234  | 2.3E-05 | 0.00012024 | Ints7         |
| ENSMUSG00000003344 | 1500.925  | -0.733 | 0.178 | -4.119  | 3.8E-05 | 0.000193   | Btbd2         |
| ENSMUSG00000039428 | 1654.743  | -0.734 | 0.129 | -5.690  | 1.3E-08 | 1.0003E-07 | Tmem135       |
| ENSMUSG00000041632 | 866.955   | -0.735 | 0.168 | -4.379  | 1.2E-05 | 6.5254E-05 | Mrps27        |
| ENSMUSG00000026930 | 396.641   | -0.735 | 0.239 | -3.077  | 2.1E-03 | 0.00778803 | Gpsm1         |
| ENSMUSG00000038388 | 3380.823  | -0.735 | 0.108 | -6.802  | 1.0E-11 | 1.0671E-10 | Mpp6          |
| ENSMUSG00000064326 | 2437.291  | -0.735 | 0.125 | -5.870  | 4.4E-09 | 3.6151E-08 | Sival         |
| ENSMUSG00000057894 | 636.812   | -0.736 | 0.188 | -3.908  | 9.3E-05 | 0.00044379 | Zfp329        |
| ENSMUSG00000115049 | 264.834   | -0.736 | 0.211 | -3.496  | 4.7E-04 | 0.00198845 | Gm49172       |
| ENSMUSG00000015189 | 924.415   | -0.736 | 0.177 | -4.161  | 3.2E-05 | 0.00016223 | Casd1         |
| ENSMUSG00000042208 | 1092.001  | -0.736 | 0.168 | -4.381  | 1.2E-05 | 6.4663E-05 | 0610010F05Rik |
| ENSMUSG00000029326 | 1397.659  | -0.737 | 0.127 | -5.799  | 6.7E-09 | 5.4131E-08 | Enoph1        |
| ENSMUSG00000096433 | 205.391   | -0.737 | 0.279 | -2.645  | 8.2E-03 | 0.02623648 | Zfp994        |
| ENSMUSG00000084799 | 98.081    | -0.737 | 0.251 | -2.936  | 3.3E-03 | 0.01185638 | Ino80dos      |
| ENSMUSG00000039680 | 718.492   | -0.737 | 0.162 | -4.543  | 5.5E-06 | 3.1749E-05 | Mrps6         |
| ENSMUSG00000043391 | 2125.263  | -0.737 | 0.162 | -4.549  | 5.4E-06 | 3.0911E-05 | 2510009E07Rik |
| ENSMUSG00000024181 | 4604.751  | -0.737 | 0.087 | -8.477  | 2.3E-17 | 3.5745E-16 | Mrpl28        |
| ENSMUSG00000026630 | 224.070   | -0.738 | 0.203 | -3.633  | 2.8E-04 | 0.00123538 | Batf3         |
| ENSMUSG00000062683 | 819.802   | -0.739 | 0.113 | -6.531  | 6.5E-11 | 6.3346E-10 | Atp5g2        |
| ENSMUSG00000031953 | 198.817   | -0.739 | 0.267 | -2.763  | 5.7E-03 | 0.01921516 | Tmem170       |
| ENSMUSG00000070923 | 3795.241  | -0.739 | 0.097 | -7.621  | 2.5E-14 | 3.1697E-13 | Klh19         |
| ENSMUSG00000027452 | 716.036   | -0.739 | 0.198 | -3.742  | 1.8E-04 | 0.00083021 | Accs1         |
| ENSMUSG00000064317 | 96.008    | -0.740 | 0.233 | -3.177  | 1.5E-03 | 0.00571648 | Gm10146       |
| ENSMUSG00000020949 | 919.838   | -0.740 | 0.119 | -6.212  | 5.2E-10 | 4.7022E-09 | Fkbp3         |
| ENSMUSG00000100691 | 240.225   | -0.740 | 0.222 | -3.328  | 8.7E-04 | 0.00350363 | 2010320M18Rik |
| ENSMUSG00000028010 | 1217.821  | -0.740 | 0.159 | -4.665  | 3.1E-06 | 1.8344E-05 | Gar1          |
| ENSMUSG00000005034 | 3258.106  | -0.740 | 0.141 | -5.240  | 1.6E-07 | 1.1179E-06 | Prkacb        |

|                    |           |        |       |         |         |            |           |
|--------------------|-----------|--------|-------|---------|---------|------------|-----------|
| ENSMUSG00000028470 | 1172.036  | -0.741 | 0.138 | -5.357  | 8.5E-08 | 6.09E-07   | Hint2     |
| ENSMUSG00000036850 | 1448.611  | -0.741 | 0.102 | -7.297  | 2.9E-13 | 3.4683E-12 | Mrpl41    |
| ENSMUSG00000037851 | 2327.228  | -0.741 | 0.134 | -5.536  | 3.1E-08 | 2.3432E-07 | Iars      |
| ENSMUSG00000024579 | 473.826   | -0.741 | 0.171 | -4.334  | 1.5E-05 | 7.9016E-05 | Peyox11   |
| ENSMUSG00000001029 | 647.899   | -0.741 | 0.193 | -3.845  | 1.2E-04 | 0.0005643  | Icam2     |
| ENSMUSG00000045973 | 3157.159  | -0.741 | 0.092 | -8.094  | 5.8E-16 | 8.1458E-15 | Slc25a51  |
| ENSMUSG00000022295 | 12845.001 | -0.741 | 0.076 | -9.778  | 1.4E-22 | 2.8968E-21 | Atp6v1c1  |
| ENSMUSG00000019558 | 7266.888  | -0.742 | 0.156 | -4.754  | 2.0E-06 | 1.2116E-05 | Slc6a8    |
| ENSMUSG00000021009 | 229.376   | -0.742 | 0.286 | -2.599  | 9.4E-03 | 0.02947283 | Ptpn21    |
| ENSMUSG00000031521 | 2548.931  | -0.743 | 0.105 | -7.058  | 1.7E-12 | 1.876E-11  | Aga       |
| ENSMUSG00000025209 | 629.893   | -0.743 | 0.199 | -3.724  | 2.0E-04 | 0.00088776 | Twnk      |
| ENSMUSG00000030386 | 310.121   | -0.743 | 0.220 | -3.372  | 7.5E-04 | 0.00303269 | Zfp606    |
| ENSMUSG00000041037 | 389.844   | -0.743 | 0.248 | -2.993  | 2.8E-03 | 0.01002256 | Irgq      |
| ENSMUSG00000099471 | 70.459    | -0.743 | 0.289 | -2.568  | 1.0E-02 | 0.03184531 | Gm8451    |
| ENSMUSG00000020086 | 162.107   | -0.745 | 0.254 | -2.935  | 3.3E-03 | 0.01188787 | Macroh2a2 |
| ENSMUSG00000072946 | 704.250   | -0.745 | 0.151 | -4.929  | 8.3E-07 | 5.2506E-06 | Ptgr2     |
| ENSMUSG00000038489 | 791.690   | -0.745 | 0.211 | -3.538  | 4.0E-04 | 0.00172278 | Polr21    |
| ENSMUSG00000028292 | 1137.446  | -0.746 | 0.120 | -6.234  | 4.6E-10 | 4.1287E-09 | Rars2     |
| ENSMUSG00000031955 | 1462.633  | -0.746 | 0.212 | -3.523  | 4.3E-04 | 0.00181159 | Bcar1     |
| ENSMUSG00000020520 | 2193.574  | -0.746 | 0.142 | -5.267  | 1.4E-07 | 9.7385E-07 | Galnt10   |
| ENSMUSG00000063894 | 294.414   | -0.746 | 0.258 | -2.898  | 3.8E-03 | 0.01319461 | Zkscan8   |
| ENSMUSG00000057421 | 1342.702  | -0.747 | 0.131 | -5.716  | 1.1E-08 | 8.6555E-08 | Las11     |
| ENSMUSG00000014748 | 6986.197  | -0.748 | 0.091 | -8.244  | 1.7E-16 | 2.4344E-15 | Tex261    |
| ENSMUSG00000032492 | 324.509   | -0.748 | 0.219 | -3.417  | 6.3E-04 | 0.00260166 | Pth1r     |
| ENSMUSG00000111966 | 128.158   | -0.748 | 0.236 | -3.169  | 1.5E-03 | 0.00584916 | Gm5781    |
| ENSMUSG00000041491 | 666.456   | -0.748 | 0.176 | -4.243  | 2.2E-05 | 0.00011601 | Cep78     |
| ENSMUSG00000036975 | 672.138   | -0.749 | 0.184 | -4.068  | 4.7E-05 | 0.00023708 | Tmem177   |
| ENSMUSG00000024150 | 8088.315  | -0.749 | 0.063 | -11.968 | 5.2E-33 | 1.6717E-31 | Mcf2      |
| ENSMUSG00000029173 | 388.776   | -0.749 | 0.274 | -2.731  | 6.3E-03 | 0.02097262 | Sepsecs   |
| ENSMUSG00000004552 | 232.033   | -0.749 | 0.259 | -2.893  | 3.8E-03 | 0.01337917 | Ctse      |
| ENSMUSG00000037787 | 730.112   | -0.749 | 0.169 | -4.430  | 9.4E-06 | 5.2403E-05 | Coa8      |
| ENSMUSG00000030615 | 2373.136  | -0.749 | 0.076 | -9.913  | 3.7E-23 | 7.7776E-22 | Tmem126a  |
| ENSMUSG00000075419 | 1082.187  | -0.749 | 0.204 | -3.682  | 2.3E-04 | 0.00103554 | Dolk      |
| ENSMUSG00000033488 | 424.420   | -0.750 | 0.186 | -4.024  | 5.7E-05 | 0.00028328 | Cryzl2    |
| ENSMUSG00000034108 | 1374.633  | -0.750 | 0.132 | -5.665  | 1.5E-08 | 1.1531E-07 | Ccs       |
| ENSMUSG00000009621 | 572.830   | -0.750 | 0.207 | -3.618  | 3.0E-04 | 0.00130171 | Vav2      |
| ENSMUSG00000002968 | 4050.749  | -0.751 | 0.094 | -8.007  | 1.2E-15 | 1.6285E-14 | Med25     |
| ENSMUSG00000049422 | 378.333   | -0.752 | 0.202 | -3.720  | 2.0E-04 | 0.00090064 | Chchd10   |
| ENSMUSG00000053897 | 291.140   | -0.752 | 0.285 | -2.638  | 8.3E-03 | 0.02670892 | Slc39a8   |
| ENSMUSG00000031388 | 416.277   | -0.752 | 0.164 | -4.582  | 4.6E-06 | 2.6645E-05 | Naa10     |
| ENSMUSG00000057657 | 522.403   | -0.752 | 0.125 | -6.032  | 1.6E-09 | 1.3972E-08 | Rps18-ps3 |
| ENSMUSG00000026193 | 4468.702  | -0.753 | 0.221 | -3.407  | 6.6E-04 | 0.00268965 | Fn1       |
| ENSMUSG00000036880 | 3037.137  | -0.753 | 0.111 | -6.798  | 1.1E-11 | 1.1002E-10 | Acaa2     |
| ENSMUSG00000020898 | 760.682   | -0.753 | 0.195 | -3.865  | 1.1E-04 | 0.00052326 | Ctc1      |
| ENSMUSG00000037260 | 6141.377  | -0.753 | 0.124 | -6.082  | 1.2E-09 | 1.0362E-08 | Hgsnat    |
| ENSMUSG00000032047 | 2640.826  | -0.754 | 0.126 | -5.978  | 2.3E-09 | 1.9197E-08 | Acat1     |
| ENSMUSG00000044982 | 391.355   | -0.754 | 0.201 | -3.747  | 1.8E-04 | 0.00081734 | Sft2d3    |
| ENSMUSG00000028861 | 2996.440  | -0.754 | 0.070 | -10.702 | 1.0E-26 | 2.4423E-25 | Mrps15    |
| ENSMUSG00000062762 | 3190.234  | -0.755 | 0.103 | -7.325  | 2.4E-13 | 2.8356E-12 | Ei24      |
| ENSMUSG00000066724 | 136.650   | -0.755 | 0.215 | -3.512  | 4.5E-04 | 0.00188397 | Gm10175   |
| ENSMUSG00000030850 | 1848.888  | -0.755 | 0.105 | -7.210  | 5.6E-13 | 6.4327E-12 | Ate1      |
| ENSMUSG00000002660 | 2236.989  | -0.755 | 0.152 | -4.981  | 6.3E-07 | 4.0718E-06 | Clpp      |

|                     |           |        |       |        |         |            |               |
|---------------------|-----------|--------|-------|--------|---------|------------|---------------|
| ENSMUSG00000049881  | 441.267   | -0.755 | 0.218 | -3.472 | 5.2E-04 | 0.00216314 | 2810025M15Rik |
| ENSMUSG00000031782  | 1793.668  | -0.756 | 0.119 | -6.332 | 2.4E-10 | 2.2515E-09 | Coq9          |
| ENSMUSG00000026806  | 951.030   | -0.756 | 0.204 | -3.702 | 2.1E-04 | 0.00096214 | Ddx31         |
| ENSMUSG00000022558  | 2376.092  | -0.756 | 0.134 | -5.635 | 1.8E-08 | 1.3619E-07 | Mroh1         |
| ENSMUSG00000030161  | 5176.206  | -0.756 | 0.128 | -5.905 | 3.5E-09 | 2.9469E-08 | Gabarap11     |
| ENSMUSG00000029575  | 422.116   | -0.757 | 0.241 | -3.136 | 1.7E-03 | 0.00649551 | Mmab          |
| ENSMUSG00000022377  | 4284.197  | -0.757 | 0.134 | -5.640 | 1.7E-08 | 1.3262E-07 | Asap1         |
| ENSMUSG00000021629  | 2675.894  | -0.757 | 0.141 | -5.374 | 7.7E-08 | 5.5858E-07 | Slc30a5       |
| ENSMUSG00000043483  | 79.403    | -0.757 | 0.275 | -2.750 | 6.0E-03 | 0.0198904  | Gm6863        |
| ENSMUSG00000053332  | 3732.499  | -0.758 | 0.110 | -6.900 | 5.2E-12 | 5.512E-11  | Gas5          |
| ENSMUSG00000024436  | 738.271   | -0.758 | 0.172 | -4.392 | 1.1E-05 | 6.1766E-05 | Mrps18b       |
| ENSMUSG00000083454  | 142.117   | -0.758 | 0.225 | -3.368 | 7.6E-04 | 0.00307068 | Gm13226       |
| ENSMUSG00000062014  | 5152.298  | -0.759 | 0.089 | -8.499 | 1.9E-17 | 2.9733E-16 | Gmfb          |
| ENSMUSG00000018574  | 1944.287  | -0.759 | 0.112 | -6.754 | 1.4E-11 | 1.4655E-10 | Acadv1        |
| ENSMUSG00000050148  | 1705.155  | -0.759 | 0.146 | -5.217 | 1.8E-07 | 1.26E-06   | Ubqln2        |
| ENSMUSG00000023915  | 3845.435  | -0.759 | 0.128 | -5.917 | 3.3E-09 | 2.7501E-08 | Tnfrsf21      |
| ENSMUSG00000052151  | 937.624   | -0.759 | 0.167 | -4.545 | 5.5E-06 | 3.1539E-05 | Plpp2         |
| ENSMUSG00000030271  | 338.978   | -0.760 | 0.219 | -3.470 | 5.2E-04 | 0.00217277 | Ogg1          |
| ENSMUSG00000034543  | 1641.709  | -0.760 | 0.153 | -4.976 | 6.5E-07 | 4.1833E-06 | More2a        |
| ENSMUSG00000036503  | 8420.707  | -0.760 | 0.087 | -8.735 | 2.4E-18 | 4.0134E-17 | Rnfl3         |
| ENSMUSG00000078956  | 271.896   | -0.760 | 0.204 | -3.720 | 2.0E-04 | 0.00089976 | Gm14221       |
| ENSMUSG00000024588  | 2766.675  | -0.761 | 0.099 | -7.645 | 2.1E-14 | 2.6554E-13 | Fech          |
| ENSMUSG00000020267  | 10132.325 | -0.761 | 0.099 | -7.687 | 1.5E-14 | 1.9321E-13 | Hint1         |
| ENSMUSG00000044092  | 412.911   | -0.761 | 0.249 | -3.055 | 2.2E-03 | 0.00831958 | C130050O18Rik |
| ENSMUSG00000043162  | 383.842   | -0.761 | 0.147 | -5.193 | 2.1E-07 | 1.4172E-06 | Pyurf         |
| ENSMUSG00000037526  | 522.398   | -0.762 | 0.156 | -4.885 | 1.0E-06 | 6.4848E-06 | Atg14         |
| ENSMUSG00000035754  | 5274.809  | -0.762 | 0.095 | -8.039 | 9.1E-16 | 1.2643E-14 | Wdr18         |
| ENSMUSG00000032305  | 1347.713  | -0.762 | 0.146 | -5.236 | 1.6E-07 | 1.1433E-06 | Fam219b       |
| ENSMUSG00000037710  | 1583.361  | -0.763 | 0.127 | -6.018 | 1.8E-09 | 1.5211E-08 | Cisd1         |
| ENSMUSG00000059482  | 395.416   | -0.763 | 0.275 | -2.773 | 5.6E-03 | 0.01870124 | 2610301B20Rik |
| ENSMUSG00000008668  | 8621.970  | -0.763 | 0.147 | -5.180 | 2.2E-07 | 1.5155E-06 | Rps18         |
| ENSMUSG00000025956  | 708.618   | -0.764 | 0.154 | -4.974 | 6.6E-07 | 4.2231E-06 | Mettl21a      |
| ENSMUSG00000014470  | 3545.800  | -0.765 | 0.090 | -8.485 | 2.2E-17 | 3.351E-16  | Rnfl66        |
| ENSMUSG00000026313  | 1299.275  | -0.765 | 0.140 | -5.477 | 4.3E-08 | 3.2289E-07 | Hdac4         |
| ENSMUSG00000033653  | 1340.189  | -0.765 | 0.176 | -4.344 | 1.4E-05 | 7.5638E-05 | Vps8          |
| ENSMUSG00000041215  | 616.202   | -0.765 | 0.177 | -4.333 | 1.5E-05 | 7.9241E-05 | Yeats2        |
| ENSMUSG00000019518  | 246.101   | -0.766 | 0.242 | -3.162 | 1.6E-03 | 0.00598441 | Ap4m1         |
| ENSMUSG00000025731  | 461.032   | -0.766 | 0.200 | -3.826 | 1.3E-04 | 0.00060872 | Mettl26       |
| ENSMUSG00000040952  | 16212.740 | -0.766 | 0.123 | -6.242 | 4.3E-10 | 3.9222E-09 | Rps19         |
| ENSMUSG00000028211  | 642.810   | -0.766 | 0.220 | -3.486 | 4.9E-04 | 0.00206201 | Trp53inp1     |
| ENSMUSG000000111740 | 154.538   | -0.766 | 0.295 | -2.595 | 9.5E-03 | 0.02974695 | Gm49783       |
| ENSMUSG00000022750  | 1015.423  | -0.766 | 0.195 | -3.931 | 8.5E-05 | 0.00040706 | Klh122        |
| ENSMUSG00000031985  | 2106.227  | -0.766 | 0.115 | -6.661 | 2.7E-11 | 2.7211E-10 | Gnpat         |
| ENSMUSG00000054150  | 410.177   | -0.767 | 0.285 | -2.691 | 7.1E-03 | 0.02323752 | Syne3         |
| ENSMUSG00000029096  | 495.792   | -0.767 | 0.288 | -2.661 | 7.8E-03 | 0.0251305  | Htra3         |
| ENSMUSG00000044636  | 321.308   | -0.767 | 0.193 | -3.979 | 6.9E-05 | 0.00033764 | Csrnp2        |
| ENSMUSG00000020255  | 1349.824  | -0.767 | 0.128 | -6.014 | 1.8E-09 | 1.5582E-08 | D10Wsu102e    |
| ENSMUSG00000014496  | 711.266   | -0.767 | 0.152 | -5.039 | 4.7E-07 | 3.0556E-06 | Ankrd28       |
| ENSMUSG00000038871  | 518.877   | -0.768 | 0.285 | -2.696 | 7.0E-03 | 0.02295867 | Bpgm          |
| ENSMUSG00000020334  | 782.927   | -0.768 | 0.161 | -4.772 | 1.8E-06 | 1.1119E-05 | Slc22a4       |
| ENSMUSG00000030314  | 3493.187  | -0.769 | 0.094 | -8.149 | 3.7E-16 | 5.2557E-15 | Atg7          |
| ENSMUSG00000059743  | 104.071   | -0.769 | 0.285 | -2.702 | 6.9E-03 | 0.02262174 | Fdps          |

|                     |           |        |       |         |         |            |           |
|---------------------|-----------|--------|-------|---------|---------|------------|-----------|
| ENSMUSG00000037824  | 4791.195  | -0.770 | 0.095 | -8.112  | 5.0E-16 | 7.0756E-15 | Tspan14   |
| ENSMUSG00000040146  | 137.495   | -0.770 | 0.308 | -2.500  | 1.2E-02 | 0.03785748 | Rgl3      |
| ENSMUSG00000030768  | 486.722   | -0.770 | 0.213 | -3.613  | 3.0E-04 | 0.00132123 | Disp1     |
| ENSMUSG00000026812  | 498.371   | -0.770 | 0.167 | -4.598  | 4.3E-06 | 2.4842E-05 | Tsc1      |
| ENSMUSG000000107023 | 154.631   | -0.770 | 0.318 | -2.422  | 1.5E-02 | 0.04583007 | Gm42715   |
| ENSMUSG00000028582  | 1049.531  | -0.771 | 0.157 | -4.916  | 8.8E-07 | 5.5981E-06 | Cc2d1b    |
| ENSMUSG00000029804  | 597.258   | -0.771 | 0.174 | -4.438  | 9.1E-06 | 5.0693E-05 | Herc3     |
| ENSMUSG00000036819  | 421.592   | -0.771 | 0.290 | -2.659  | 7.8E-03 | 0.02528083 | Jmjd4     |
| ENSMUSG00000062691  | 349.807   | -0.771 | 0.173 | -4.450  | 8.6E-06 | 4.8034E-05 | Cebpzos   |
| ENSMUSG00000000594  | 26354.545 | -0.772 | 0.076 | -10.112 | 4.9E-24 | 1.0758E-22 | Gm2a      |
| ENSMUSG00000039318  | 1763.010  | -0.772 | 0.139 | -5.544  | 3.0E-08 | 2.2424E-07 | Rab3gap2  |
| ENSMUSG00000002343  | 584.654   | -0.772 | 0.221 | -3.488  | 4.9E-04 | 0.0020445  | Armc6     |
| ENSMUSG00000080921  | 256.854   | -0.773 | 0.224 | -3.446  | 5.7E-04 | 0.00235822 | Rpl38-ps2 |
| ENSMUSG00000054428  | 2824.877  | -0.773 | 0.124 | -6.246  | 4.2E-10 | 3.8419E-09 | Atpif1    |
| ENSMUSG00000024208  | 2343.701  | -0.774 | 0.137 | -5.665  | 1.5E-08 | 1.1492E-07 | Uqcc2     |
| ENSMUSG00000006057  | 3468.783  | -0.774 | 0.095 | -8.138  | 4.0E-16 | 5.7267E-15 | Atp5g1    |
| ENSMUSG00000062949  | 498.946   | -0.774 | 0.184 | -4.196  | 2.7E-05 | 0.00014028 | Atp11c    |
| ENSMUSG00000027395  | 666.985   | -0.774 | 0.229 | -3.378  | 7.3E-04 | 0.00297008 | Polr1b    |
| ENSMUSG00000042447  | 781.185   | -0.775 | 0.212 | -3.659  | 2.5E-04 | 0.00112626 | Mios      |
| ENSMUSG00000033400  | 2162.644  | -0.775 | 0.096 | -8.072  | 6.9E-16 | 9.7203E-15 | Agl       |
| ENSMUSG00000022751  | 1398.244  | -0.775 | 0.103 | -7.491  | 6.9E-14 | 8.4318E-13 | Nit2      |
| ENSMUSG00000022194  | 354.340   | -0.775 | 0.204 | -3.795  | 1.5E-04 | 0.00068269 | Pabpn1    |
| ENSMUSG00000041354  | 4027.084  | -0.775 | 0.099 | -7.820  | 5.3E-15 | 6.965E-14  | Rgl2      |
| ENSMUSG00000020326  | 9232.850  | -0.776 | 0.087 | -8.947  | 3.6E-19 | 6.2945E-18 | Ccng1     |
| ENSMUSG00000037563  | 4470.432  | -0.776 | 0.169 | -4.601  | 4.2E-06 | 2.4549E-05 | Rps16     |
| ENSMUSG00000022178  | 443.304   | -0.777 | 0.215 | -3.619  | 3.0E-04 | 0.00129791 | Ajuba     |
| ENSMUSG00000029535  | 2586.417  | -0.777 | 0.101 | -7.683  | 1.5E-14 | 1.9817E-13 | Triap1    |
| ENSMUSG00000040813  | 5258.431  | -0.777 | 0.102 | -7.614  | 2.7E-14 | 3.3574E-13 | Tex264    |
| ENSMUSG00000079435  | 1253.978  | -0.778 | 0.169 | -4.616  | 3.9E-06 | 2.2901E-05 | Rpl36a    |
| ENSMUSG00000030878  | 255.164   | -0.778 | 0.281 | -2.768  | 5.6E-03 | 0.01896819 | Cdr2      |
| ENSMUSG00000006356  | 1944.619  | -0.778 | 0.133 | -5.851  | 4.9E-09 | 4.0443E-08 | Crip2     |
| ENSMUSG00000030942  | 2653.574  | -0.779 | 0.114 | -6.858  | 7.0E-12 | 7.3342E-11 | Thumpd1   |
| ENSMUSG00000066407  | 294.372   | -0.779 | 0.172 | -4.534  | 5.8E-06 | 3.3135E-05 | Gm10263   |
| ENSMUSG00000031767  | 383.246   | -0.779 | 0.185 | -4.206  | 2.6E-05 | 0.0001349  | Nudt7     |
| ENSMUSG00000038776  | 1027.100  | -0.780 | 0.168 | -4.639  | 3.5E-06 | 2.0642E-05 | Ephx1     |
| ENSMUSG00000024537  | 1009.574  | -0.780 | 0.131 | -5.946  | 2.8E-09 | 2.3268E-08 | Psmg2     |
| ENSMUSG00000010538  | 74.842    | -0.781 | 0.301 | -2.591  | 9.6E-03 | 0.03009561 | Tsacc     |
| ENSMUSG00000028007  | 1410.241  | -0.781 | 0.128 | -6.084  | 1.2E-09 | 1.0268E-08 | Snx7      |
| ENSMUSG00000090952  | 95.221    | -0.781 | 0.251 | -3.115  | 1.8E-03 | 0.006924   | Gm17251   |
| ENSMUSG00000028833  | 1741.213  | -0.781 | 0.143 | -5.469  | 4.5E-08 | 3.3686E-07 | Ncdn      |
| ENSMUSG00000026858  | 570.291   | -0.781 | 0.226 | -3.458  | 5.5E-04 | 0.00226981 | Miga2     |
| ENSMUSG00000040564  | 122.225   | -0.782 | 0.313 | -2.500  | 1.2E-02 | 0.0378515  | Apoc1     |
| ENSMUSG000000117869 | 367.492   | -0.783 | 0.224 | -3.489  | 4.8E-04 | 0.00203725 | Snhg4     |
| ENSMUSG00000055491  | 1841.955  | -0.783 | 0.154 | -5.089  | 3.6E-07 | 2.3911E-06 | Pprcl     |
| ENSMUSG00000008435  | 1446.568  | -0.783 | 0.129 | -6.064  | 1.3E-09 | 1.1579E-08 | Rdh13     |
| ENSMUSG00000030871  | 372.359   | -0.784 | 0.223 | -3.511  | 4.5E-04 | 0.00189042 | Ears2     |
| ENSMUSG00000047675  | 5393.780  | -0.784 | 0.176 | -4.448  | 8.7E-06 | 4.843E-05  | Rps8      |
| ENSMUSG00000026563  | 433.967   | -0.784 | 0.164 | -4.785  | 1.7E-06 | 1.0499E-05 | Tada1     |
| ENSMUSG00000030089  | 795.328   | -0.785 | 0.137 | -5.731  | 1.0E-08 | 7.9896E-08 | Slc41a3   |
| ENSMUSG00000057691  | 1024.568  | -0.786 | 0.133 | -5.898  | 3.7E-09 | 3.0661E-08 | Zfp746    |
| ENSMUSG00000020075  | 2874.753  | -0.786 | 0.116 | -6.794  | 1.1E-11 | 1.1275E-10 | Ddx21     |
| ENSMUSG00000033629  | 2580.338  | -0.787 | 0.103 | -7.660  | 1.9E-14 | 2.3587E-13 | Hacd3     |

|                    |           |        |       |         |         |            |               |
|--------------------|-----------|--------|-------|---------|---------|------------|---------------|
| ENSMUSG00000057229 | 1103.241  | -0.787 | 0.158 | -4.984  | 6.2E-07 | 4.0207E-06 | Dmac2         |
| ENSMUSG00000056216 | 3657.195  | -0.787 | 0.106 | -7.439  | 1.0E-13 | 1.2365E-12 | Cebp $\beta$  |
| ENSMUSG00000043964 | 2304.374  | -0.787 | 0.116 | -6.797  | 1.1E-11 | 1.1081E-10 | Orai3         |
| ENSMUSG00000029600 | 379.545   | -0.788 | 0.301 | -2.616  | 8.9E-03 | 0.0282758  | Rita1         |
| ENSMUSG00000021108 | 1951.304  | -0.789 | 0.134 | -5.866  | 4.5E-09 | 3.6954E-08 | Prkch         |
| ENSMUSG00000026600 | 17540.266 | -0.789 | 0.088 | -8.964  | 3.1E-19 | 5.4438E-18 | Soat1         |
| ENSMUSG00000035877 | 213.723   | -0.789 | 0.295 | -2.673  | 7.5E-03 | 0.02437637 | Zhx3          |
| ENSMUSG00000083282 | 642.018   | -0.789 | 0.224 | -3.527  | 4.2E-04 | 0.00178628 | Ctsf          |
| ENSMUSG00000054452 | 10654.724 | -0.789 | 0.075 | -10.553 | 4.9E-26 | 1.1757E-24 | Tle5          |
| ENSMUSG00000033020 | 1986.001  | -0.789 | 0.129 | -6.103  | 1.0E-09 | 9.1258E-09 | Polr2f        |
| ENSMUSG00000036632 | 2479.701  | -0.790 | 0.082 | -9.661  | 4.4E-22 | 8.9042E-21 | Alg5          |
| ENSMUSG00000024078 | 584.683   | -0.790 | 0.240 | -3.293  | 9.9E-04 | 0.00393033 | Ttc27         |
| ENSMUSG00000039046 | 496.309   | -0.790 | 0.211 | -3.743  | 1.8E-04 | 0.00082848 | Usp6nl        |
| ENSMUSG00000026860 | 1909.831  | -0.790 | 0.131 | -6.022  | 1.7E-09 | 1.4805E-08 | Sh3glb2       |
| ENSMUSG00000068689 | 63.275    | -0.790 | 0.277 | -2.855  | 4.3E-03 | 0.01489949 | Rps19-ps9     |
| ENSMUSG00000037679 | 1247.539  | -0.790 | 0.232 | -3.409  | 6.5E-04 | 0.00267623 | Inf2          |
| ENSMUSG00000057069 | 696.653   | -0.791 | 0.156 | -5.060  | 4.2E-07 | 2.7579E-06 | Ero1b         |
| ENSMUSG00000049439 | 1691.751  | -0.791 | 0.114 | -6.927  | 4.3E-12 | 4.6083E-11 | Cyp20a1       |
| ENSMUSG00000025103 | 4138.098  | -0.791 | 0.107 | -7.380  | 1.6E-13 | 1.9021E-12 | Btbd1         |
| ENSMUSG00000000282 | 892.048   | -0.791 | 0.170 | -4.659  | 3.2E-06 | 1.8863E-05 | Mnt           |
| ENSMUSG00000021190 | 94789.298 | -0.791 | 0.143 | -5.546  | 2.9E-08 | 2.2239E-07 | Lgmn          |
| ENSMUSG00000066839 | 930.042   | -0.792 | 0.182 | -4.348  | 1.4E-05 | 7.4353E-05 | Ecsit         |
| ENSMUSG00000018651 | 330.395   | -0.792 | 0.278 | -2.852  | 4.3E-03 | 0.01504141 | Tada2a        |
| ENSMUSG00000056608 | 771.322   | -0.792 | 0.131 | -6.046  | 1.5E-09 | 1.2865E-08 | Chd9          |
| ENSMUSG00000020661 | 6419.041  | -0.793 | 0.096 | -8.257  | 1.5E-16 | 2.1907E-15 | Dnmt3a        |
| ENSMUSG00000020116 | 3317.684  | -0.793 | 0.099 | -7.990  | 1.4E-15 | 1.8578E-14 | Pno1          |
| ENSMUSG00000027330 | 486.663   | -0.793 | 0.267 | -2.967  | 3.0E-03 | 0.01082635 | Cdc25b        |
| ENSMUSG00000026179 | 812.080   | -0.793 | 0.155 | -5.107  | 3.3E-07 | 2.1882E-06 | Pnkd          |
| ENSMUSG00000042632 | 413.834   | -0.794 | 0.275 | -2.891  | 3.8E-03 | 0.01344568 | Pla2g6        |
| ENSMUSG00000026617 | 1561.196  | -0.794 | 0.125 | -6.356  | 2.1E-10 | 1.9501E-09 | Bpnt1         |
| ENSMUSG00000036879 | 580.078   | -0.794 | 0.251 | -3.166  | 1.5E-03 | 0.0059208  | Phkb          |
| ENSMUSG00000019808 | 237.880   | -0.794 | 0.257 | -3.085  | 2.0E-03 | 0.00759427 | Adat2         |
| ENSMUSG00000001909 | 1329.109  | -0.794 | 0.147 | -5.415  | 6.1E-08 | 4.4987E-07 | Trmt1         |
| ENSMUSG00000063785 | 1055.340  | -0.794 | 0.131 | -6.074  | 1.2E-09 | 1.0856E-08 | Utp14a        |
| ENSMUSG00000083914 | 194.221   | -0.795 | 0.223 | -3.560  | 3.7E-04 | 0.00159449 | Rps18-ps1     |
| ENSMUSG00000033386 | 5070.232  | -0.795 | 0.070 | -11.404 | 4.0E-30 | 1.1298E-28 | Frrs1         |
| ENSMUSG00000025047 | 891.941   | -0.795 | 0.191 | -4.168  | 3.1E-05 | 0.00015741 | Pdcd11        |
| ENSMUSG00000025169 | 482.237   | -0.796 | 0.234 | -3.403  | 6.7E-04 | 0.00272809 | Ogfd3         |
| ENSMUSG00000031938 | 444.655   | -0.796 | 0.195 | -4.076  | 4.6E-05 | 0.00022947 | 4931406C07Rik |
| ENSMUSG00000058748 | 286.713   | -0.796 | 0.257 | -3.103  | 1.9E-03 | 0.00718507 | Zfp958        |
| ENSMUSG00000022574 | 230.779   | -0.797 | 0.285 | -2.795  | 5.2E-03 | 0.01765446 | Naprt         |
| ENSMUSG00000025486 | 371.680   | -0.797 | 0.217 | -3.677  | 2.4E-04 | 0.00105439 | Sirt3         |
| ENSMUSG00000046873 | 572.812   | -0.797 | 0.191 | -4.175  | 3.0E-05 | 0.000153   | Mbtps2        |
| ENSMUSG00000047676 | 175.754   | -0.797 | 0.203 | -3.927  | 8.6E-05 | 0.00041338 | Rpsa-ps10     |
| ENSMUSG00000023143 | 5535.352  | -0.798 | 0.102 | -7.827  | 5.0E-15 | 6.6171E-14 | Nagpa         |
| ENSMUSG00000024787 | 1941.888  | -0.798 | 0.147 | -5.417  | 6.1E-08 | 4.4442E-07 | Snx15         |
| ENSMUSG00000057411 | 858.501   | -0.798 | 0.149 | -5.341  | 9.2E-08 | 6.6289E-07 | Antkmt        |
| ENSMUSG00000068184 | 695.131   | -0.798 | 0.148 | -5.392  | 7.0E-08 | 5.0671E-07 | Ndufaf2       |
| ENSMUSG00000020814 | 277.779   | -0.799 | 0.281 | -2.842  | 4.5E-03 | 0.015512   | Mxra7         |
| ENSMUSG00000042111 | 2595.177  | -0.799 | 0.118 | -6.757  | 1.4E-11 | 1.4405E-10 | Ccdc115       |
| ENSMUSG00000028573 | 338.005   | -0.799 | 0.218 | -3.659  | 2.5E-04 | 0.00112626 | Fggy          |
| ENSMUSG00000026887 | 577.490   | -0.799 | 0.207 | -3.862  | 1.1E-04 | 0.00052928 | Mrrf          |



|                     |            |        |       |         |         |            |          |
|---------------------|------------|--------|-------|---------|---------|------------|----------|
| ENSMUSG00000020282  | 553.506    | -0.800 | 0.288 | -2.777  | 5.5E-03 | 0.01854387 | Rhbdf1   |
| ENSMUSG00000011257  | 323.297    | -0.800 | 0.171 | -4.668  | 3.0E-06 | 1.8061E-05 | Pabpc4   |
| ENSMUSG00000048486  | 391.876    | -0.800 | 0.252 | -3.170  | 1.5E-03 | 0.00583435 | Fitm2    |
| ENSMUSG00000074649  | 715.372    | -0.800 | 0.145 | -5.517  | 3.5E-08 | 2.6005E-07 | BC029722 |
| ENSMUSG00000062937  | 1781.870   | -0.801 | 0.189 | -4.240  | 2.2E-05 | 0.00011739 | Mtap     |
| ENSMUSG00000070354  | 215.504    | -0.801 | 0.244 | -3.286  | 1.0E-03 | 0.00402708 | Evi2     |
| ENSMUSG00000040820  | 270.143    | -0.802 | 0.277 | -2.891  | 3.8E-03 | 0.01343855 | Hlcs     |
| ENSMUSG00000038894  | 1017.224   | -0.803 | 0.297 | -2.706  | 6.8E-03 | 0.02241267 | Irs2     |
| ENSMUSG00000025648  | 1757.161   | -0.803 | 0.124 | -6.466  | 1.0E-10 | 9.6164E-10 | Pfkfb4   |
| ENSMUSG00000000605  | 3605.340   | -0.803 | 0.114 | -7.015  | 2.3E-12 | 2.5305E-11 | Clcn4    |
| ENSMUSG00000034723  | 1291.317   | -0.803 | 0.154 | -5.210  | 1.9E-07 | 1.3006E-06 | Tmx4     |
| ENSMUSG00000032398  | 1361.039   | -0.803 | 0.109 | -7.355  | 1.9E-13 | 2.2985E-12 | Snape5   |
| ENSMUSG00000030753  | 836.138    | -0.804 | 0.227 | -3.546  | 3.9E-04 | 0.00167256 | Thap12   |
| ENSMUSG00000022774  | 1919.712   | -0.804 | 0.128 | -6.283  | 3.3E-10 | 3.0562E-09 | Ncbp2    |
| ENSMUSG00000000631  | 990.079    | -0.805 | 0.152 | -5.290  | 1.2E-07 | 8.6765E-07 | Myo18a   |
| ENSMUSG00000041841  | 3789.847   | -0.805 | 0.181 | -4.455  | 8.4E-06 | 4.7035E-05 | Rpl37    |
| ENSMUSG00000029524  | 286.732    | -0.805 | 0.249 | -3.231  | 1.2E-03 | 0.00481545 | Sirt4    |
| ENSMUSG00000019872  | 14314.449  | -0.805 | 0.092 | -8.715  | 2.9E-18 | 4.784E-17  | Smpd13a  |
| ENSMUSG00000003848  | 2341.164   | -0.806 | 0.118 | -6.845  | 7.7E-12 | 8.013E-11  | Nob1     |
| ENSMUSG00000006289  | 2086.477   | -0.806 | 0.104 | -7.741  | 9.8E-15 | 1.2758E-13 | Osgep    |
| ENSMUSG00000033174  | 457.295    | -0.806 | 0.269 | -2.998  | 2.7E-03 | 0.00986836 | Mgll     |
| ENSMUSG00000042558  | 1860.867   | -0.806 | 0.119 | -6.794  | 1.1E-11 | 1.1257E-10 | Adprs    |
| ENSMUSG000000091478 | 188.454    | -0.807 | 0.220 | -3.668  | 2.4E-04 | 0.00108831 | Gm10039  |
| ENSMUSG00000017176  | 1123.486   | -0.807 | 0.135 | -5.968  | 2.4E-09 | 2.0401E-08 | Nt5c3b   |
| ENSMUSG00000050244  | 856.527    | -0.809 | 0.165 | -4.891  | 1.0E-06 | 6.314E-06  | Heatr1   |
| ENSMUSG00000002767  | 2330.419   | -0.810 | 0.116 | -6.995  | 2.7E-12 | 2.9051E-11 | Mrpl2    |
| ENSMUSG00000040688  | 2057.763   | -0.811 | 0.116 | -7.001  | 2.5E-12 | 2.7903E-11 | Tbl3     |
| ENSMUSG00000050708  | 592646.223 | -0.811 | 0.168 | -4.833  | 1.3E-06 | 8.3348E-06 | Ftl1     |
| ENSMUSG00000037646  | 964.719    | -0.811 | 0.143 | -5.692  | 1.3E-08 | 9.9113E-08 | Vps13b   |
| ENSMUSG00000016637  | 854.469    | -0.812 | 0.151 | -5.384  | 7.3E-08 | 5.277E-07  | Ift27    |
| ENSMUSG00000034758  | 235.554    | -0.812 | 0.274 | -2.968  | 3.0E-03 | 0.01078795 | Tle6     |
| ENSMUSG00000067288  | 4182.926   | -0.813 | 0.220 | -3.700  | 2.2E-04 | 0.00096695 | Rps28    |
| ENSMUSG00000049672  | 416.230    | -0.813 | 0.228 | -3.560  | 3.7E-04 | 0.00159555 | Zbtb14   |
| ENSMUSG00000024127  | 440.263    | -0.813 | 0.196 | -4.149  | 3.3E-05 | 0.00017029 | Prepl    |
| ENSMUSG00000039585  | 698.479    | -0.814 | 0.143 | -5.707  | 1.2E-08 | 9.1389E-08 | Myo9a    |
| ENSMUSG00000069682  | 171.770    | -0.814 | 0.206 | -3.955  | 7.7E-05 | 0.00037096 | Gm10275  |
| ENSMUSG00000091803  | 200.508    | -0.814 | 0.190 | -4.282  | 1.8E-05 | 9.8354E-05 | Cox16    |
| ENSMUSG00000035824  | 1408.894   | -0.815 | 0.132 | -6.158  | 7.4E-10 | 6.5852E-09 | Tk2      |
| ENSMUSG00000035478  | 3712.972   | -0.815 | 0.105 | -7.757  | 8.7E-15 | 1.1311E-13 | Mbd3     |
| ENSMUSG00000004610  | 325.579    | -0.815 | 0.193 | -4.216  | 2.5E-05 | 0.00012939 | Etfb     |
| ENSMUSG00000019813  | 366.657    | -0.815 | 0.222 | -3.675  | 2.4E-04 | 0.00106288 | Cep5711  |
| ENSMUSG00000032126  | 2191.720   | -0.815 | 0.108 | -7.533  | 5.0E-14 | 6.1843E-13 | Hmbs     |
| ENSMUSG00000029836  | 844.951    | -0.816 | 0.120 | -6.810  | 9.7E-12 | 1.0134E-10 | Cbx3     |
| ENSMUSG00000005237  | 216.302    | -0.816 | 0.318 | -2.565  | 1.0E-02 | 0.03213008 | Dnah2    |
| ENSMUSG00000035559  | 2863.320   | -0.816 | 0.117 | -6.988  | 2.8E-12 | 3.0376E-11 | Mpv1712  |
| ENSMUSG00000003363  | 41117.412  | -0.816 | 0.070 | -11.712 | 1.1E-31 | 3.315E-30  | Pld3     |
| ENSMUSG00000036721  | 271.353    | -0.816 | 0.264 | -3.098  | 2.0E-03 | 0.00730665 | Zscan12  |
| ENSMUSG00000021596  | 780.869    | -0.817 | 0.181 | -4.506  | 6.6E-06 | 3.7542E-05 | Mctpl    |
| ENSMUSG00000020899  | 1260.178   | -0.817 | 0.122 | -6.718  | 1.8E-11 | 1.8747E-10 | Pfas     |
| ENSMUSG00000021967  | 2447.530   | -0.817 | 0.147 | -5.553  | 2.8E-08 | 2.1356E-07 | Mrpl57   |
| ENSMUSG00000002396  | 1315.093   | -0.817 | 0.146 | -5.582  | 2.4E-08 | 1.8236E-07 | Ocell    |
| ENSMUSG00000004100  | 1841.230   | -0.818 | 0.156 | -5.244  | 1.6E-07 | 1.0951E-06 | Ppan     |

|                     |           |        |       |         |         |            |               |
|---------------------|-----------|--------|-------|---------|---------|------------|---------------|
| ENSMUSG00000028581  | 62601.051 | -0.818 | 0.074 | -11.025 | 2.9E-28 | 7.6206E-27 | Laptm5        |
| ENSMUSG00000026502  | 2555.030  | -0.818 | 0.103 | -7.913  | 2.5E-15 | 3.3972E-14 | Desi2         |
| ENSMUSG00000058979  | 611.522   | -0.819 | 0.203 | -4.040  | 5.3E-05 | 0.00026583 | Hdh5          |
| ENSMUSG00000034353  | 1096.593  | -0.819 | 0.160 | -5.116  | 3.1E-07 | 2.086E-06  | Ramp1         |
| ENSMUSG00000034430  | 1252.594  | -0.819 | 0.157 | -5.217  | 1.8E-07 | 1.26E-06   | Zxdc          |
| ENSMUSG00000026027  | 939.501   | -0.819 | 0.157 | -5.234  | 1.7E-07 | 1.1514E-06 | Stradb        |
| ENSMUSG00000032725  | 199.163   | -0.820 | 0.305 | -2.689  | 7.2E-03 | 0.02342015 | Folr2         |
| ENSMUSG00000040430  | 6370.050  | -0.821 | 0.139 | -5.920  | 3.2E-09 | 2.7102E-08 | Pitpnc1       |
| ENSMUSG00000057322  | 4769.383  | -0.822 | 0.179 | -4.581  | 4.6E-06 | 2.6838E-05 | Rpl38         |
| ENSMUSG00000027133  | 2450.940  | -0.822 | 0.139 | -5.926  | 3.1E-09 | 2.6109E-08 | Nop10         |
| ENSMUSG00000028931  | 2793.324  | -0.822 | 0.138 | -5.957  | 2.6E-09 | 2.1765E-08 | Kcnab2        |
| ENSMUSG00000031974  | 692.768   | -0.823 | 0.179 | -4.595  | 4.3E-06 | 2.5254E-05 | Abcb10        |
| ENSMUSG00000034793  | 1125.968  | -0.823 | 0.202 | -4.079  | 4.5E-05 | 0.00022721 | G6pc3         |
| ENSMUSG00000049091  | 4517.729  | -0.823 | 0.141 | -5.835  | 5.4E-09 | 4.4281E-08 | Sephs2        |
| ENSMUSG00000002661  | 824.096   | -0.823 | 0.171 | -4.812  | 1.5E-06 | 9.2201E-06 | Alkbh7        |
| ENSMUSG00000028273  | 2816.003  | -0.823 | 0.084 | -9.751  | 1.8E-22 | 3.7312E-21 | Pdlim5        |
| ENSMUSG00000034168  | 5460.471  | -0.823 | 0.105 | -7.860  | 3.8E-15 | 5.1195E-14 | Irf2bpl       |
| ENSMUSG00000022962  | 2089.694  | -0.824 | 0.145 | -5.690  | 1.3E-08 | 9.9944E-08 | Gart          |
| ENSMUSG00000031996  | 9928.356  | -0.824 | 0.095 | -8.629  | 6.2E-18 | 9.9841E-17 | Aplp2         |
| ENSMUSG00000005674  | 334.661   | -0.825 | 0.206 | -4.004  | 6.2E-05 | 0.00030657 | Tomm401       |
| ENSMUSG00000042647  | 346.113   | -0.825 | 0.233 | -3.547  | 3.9E-04 | 0.00167031 | Acad12        |
| ENSMUSG00000029119  | 4957.561  | -0.826 | 0.122 | -6.758  | 1.4E-11 | 1.4381E-10 | Man2b2        |
| ENSMUSG00000057551  | 875.384   | -0.826 | 0.153 | -5.385  | 7.2E-08 | 5.2609E-07 | Zfp317        |
| ENSMUSG00000040289  | 209.790   | -0.826 | 0.339 | -2.438  | 1.5E-02 | 0.04401331 | Hey1          |
| ENSMUSG00000029455  | 19054.294 | -0.826 | 0.066 | -12.433 | 1.7E-35 | 6.0184E-34 | Aldh2         |
| ENSMUSG00000021756  | 1949.094  | -0.827 | 0.162 | -5.110  | 3.2E-07 | 2.1582E-06 | Il6st         |
| ENSMUSG00000041774  | 221.352   | -0.827 | 0.305 | -2.714  | 6.7E-03 | 0.02195871 | Ydje          |
| ENSMUSG00000020527  | 243.420   | -0.828 | 0.291 | -2.842  | 4.5E-03 | 0.01547358 | Myo19         |
| ENSMUSG00000034854  | 7555.197  | -0.828 | 0.104 | -7.938  | 2.1E-15 | 2.7877E-14 | Mfsd12        |
| ENSMUSG00000039879  | 165.919   | -0.829 | 0.252 | -3.292  | 9.9E-04 | 0.00394024 | Heca          |
| ENSMUSG00000050796  | 1040.616  | -0.829 | 0.140 | -5.903  | 3.6E-09 | 2.981E-08  | B3galt6       |
| ENSMUSG000000116562 | 429.394   | -0.829 | 0.126 | -6.591  | 4.4E-11 | 4.3111E-10 | Gm46542       |
| ENSMUSG00000025584  | 1789.822  | -0.830 | 0.149 | -5.552  | 2.8E-08 | 2.1494E-07 | Pde8a         |
| ENSMUSG00000034121  | 183.236   | -0.830 | 0.299 | -2.776  | 5.5E-03 | 0.01860687 | Mks1          |
| ENSMUSG00000096942  | 1403.351  | -0.830 | 0.102 | -8.164  | 3.2E-16 | 4.6684E-15 | Rps19-ps6     |
| ENSMUSG00000027339  | 3685.655  | -0.830 | 0.109 | -7.585  | 3.3E-14 | 4.1795E-13 | Rassf2        |
| ENSMUSG00000007039  | 474.140   | -0.831 | 0.245 | -3.392  | 6.9E-04 | 0.00283325 | Ddah2         |
| ENSMUSG00000019864  | 744.787   | -0.831 | 0.202 | -4.110  | 4.0E-05 | 0.00019989 | Rtn4ip1       |
| ENSMUSG00000040631  | 183.224   | -0.831 | 0.319 | -2.606  | 9.2E-03 | 0.02897351 | Dok4          |
| ENSMUSG00000095567  | 3470.877  | -0.831 | 0.087 | -9.551  | 1.3E-21 | 2.5404E-20 | Noc21         |
| ENSMUSG00000034617  | 908.805   | -0.831 | 0.209 | -3.984  | 6.8E-05 | 0.00033134 | Mtrr          |
| ENSMUSG00000081929  | 180.342   | -0.831 | 0.186 | -4.470  | 7.8E-06 | 4.4007E-05 | Rps11-ps2     |
| ENSMUSG00000030652  | 1021.984  | -0.832 | 0.163 | -5.103  | 3.3E-07 | 2.2304E-06 | Coq7          |
| ENSMUSG00000070394  | 5335.094  | -0.832 | 0.130 | -6.389  | 1.7E-10 | 1.5711E-09 | Tmem256       |
| ENSMUSG00000048807  | 1638.746  | -0.832 | 0.146 | -5.692  | 1.3E-08 | 9.8962E-08 | Slc35e4       |
| ENSMUSG00000040734  | 400.478   | -0.832 | 0.238 | -3.500  | 4.6E-04 | 0.00195937 | Ppp1r131      |
| ENSMUSG00000060063  | 5079.703  | -0.832 | 0.075 | -11.131 | 8.9E-29 | 2.3999E-27 | Alox5ap       |
| ENSMUSG00000039157  | 640.218   | -0.833 | 0.219 | -3.809  | 1.4E-04 | 0.00064726 | Fam102a       |
| ENSMUSG00000051390  | 1073.677  | -0.833 | 0.143 | -5.807  | 6.4E-09 | 5.177E-08  | Zbtb22        |
| ENSMUSG00000058486  | 1849.204  | -0.833 | 0.142 | -5.860  | 4.6E-09 | 3.8263E-08 | Wdr91         |
| ENSMUSG00000010277  | 3249.461  | -0.834 | 0.123 | -6.793  | 1.1E-11 | 1.1358E-10 | 2610507B11Rik |
| ENSMUSG00000038838  | 427.895   | -0.834 | 0.259 | -3.220  | 1.3E-03 | 0.00498446 | Vars2         |

|                     |           |        |       |         |         |            |               |
|---------------------|-----------|--------|-------|---------|---------|------------|---------------|
| ENSMUSG00000021257  | 220.816   | -0.834 | 0.324 | -2.578  | 9.9E-03 | 0.03107718 | Angell        |
| ENSMUSG00000000318  | 942.779   | -0.835 | 0.207 | -4.030  | 5.6E-05 | 0.00027658 | Clec10a       |
| ENSMUSG00000063816  | 47.170    | -0.835 | 0.339 | -2.466  | 1.4E-02 | 0.04108799 | Gm4987        |
| ENSMUSG00000024232  | 1435.667  | -0.836 | 0.141 | -5.948  | 2.7E-09 | 2.2997E-08 | Bambi         |
| ENSMUSG00000091449  | 579.547   | -0.836 | 0.155 | -5.378  | 7.5E-08 | 5.4547E-07 | Gm10269       |
| ENSMUSG00000038954  | 608.664   | -0.837 | 0.195 | -4.287  | 1.8E-05 | 9.6382E-05 | Supt3         |
| ENSMUSG00000022913  | 1009.403  | -0.838 | 0.129 | -6.476  | 9.4E-11 | 9.05E-10   | Psmg1         |
| ENSMUSG00000057440  | 369.993   | -0.838 | 0.294 | -2.851  | 4.4E-03 | 0.0151023  | Mpp7          |
| ENSMUSG00000055633  | 214.373   | -0.838 | 0.311 | -2.694  | 7.1E-03 | 0.02307275 | Zfp580        |
| ENSMUSG00000028041  | 7420.425  | -0.838 | 0.117 | -7.185  | 6.7E-13 | 7.6985E-12 | Adam15        |
| ENSMUSG00000041112  | 4910.482  | -0.839 | 0.080 | -10.465 | 1.2E-25 | 2.9134E-24 | Elmo1         |
| ENSMUSG00000006732  | 1156.236  | -0.839 | 0.156 | -5.394  | 6.9E-08 | 5.0075E-07 | Mettl1        |
| ENSMUSG00000031613  | 782.482   | -0.840 | 0.240 | -3.506  | 4.5E-04 | 0.00191871 | Hpgd          |
| ENSMUSG00000097327  | 158.696   | -0.840 | 0.227 | -3.702  | 2.1E-04 | 0.00096189 | E030030I06Rik |
| ENSMUSG00000020657  | 183.521   | -0.840 | 0.335 | -2.508  | 1.2E-02 | 0.03717341 | Dnajc27       |
| ENSMUSG00000054932  | 447.448   | -0.840 | 0.214 | -3.923  | 8.8E-05 | 0.00041956 | Afp           |
| ENSMUSG00000037493  | 275.992   | -0.841 | 0.235 | -3.580  | 3.4E-04 | 0.00148719 | Cib2          |
| ENSMUSG00000014873  | 776.602   | -0.841 | 0.162 | -5.188  | 2.1E-07 | 1.4562E-06 | Surf2         |
| ENSMUSG000000117924 | 1078.457  | -0.841 | 0.162 | -5.199  | 2.0E-07 | 1.3771E-06 | Tmem223       |
| ENSMUSG00000036285  | 1164.064  | -0.841 | 0.166 | -5.062  | 4.2E-07 | 2.7291E-06 | Noa1          |
| ENSMUSG00000021952  | 445.352   | -0.842 | 0.231 | -3.645  | 2.7E-04 | 0.00118342 | Xpo4          |
| ENSMUSG00000009733  | 368.782   | -0.842 | 0.244 | -3.458  | 5.4E-04 | 0.00226747 | Tfcp2         |
| ENSMUSG00000004768  | 375.549   | -0.842 | 0.308 | -2.733  | 6.3E-03 | 0.02086354 | Rab23         |
| ENSMUSG00000022019  | 523.108   | -0.843 | 0.170 | -4.963  | 7.0E-07 | 4.4545E-06 | Tdrd3         |
| ENSMUSG00000025384  | 1328.253  | -0.843 | 0.179 | -4.716  | 2.4E-06 | 1.4473E-05 | Faap100       |
| ENSMUSG00000030678  | 2284.084  | -0.843 | 0.102 | -8.307  | 9.8E-17 | 1.4529E-15 | Maz           |
| ENSMUSG00000059734  | 6536.496  | -0.844 | 0.091 | -9.238  | 2.5E-20 | 4.6353E-19 | Ndufs8        |
| ENSMUSG00000068267  | 1261.596  | -0.844 | 0.223 | -3.785  | 1.5E-04 | 0.00071015 | Cenpb         |
| ENSMUSG00000038718  | 168.620   | -0.844 | 0.337 | -2.507  | 1.2E-02 | 0.03725488 | Pbx3          |
| ENSMUSG00000050373  | 788.105   | -0.845 | 0.200 | -4.225  | 2.4E-05 | 0.00012469 | Snx21         |
| ENSMUSG00000053205  | 598.361   | -0.845 | 0.145 | -5.824  | 5.7E-09 | 4.7093E-08 | Styx          |
| ENSMUSG00000063931  | 8003.804  | -0.845 | 0.090 | -9.425  | 4.3E-21 | 8.2611E-20 | Pepd          |
| ENSMUSG00000048126  | 460.790   | -0.845 | 0.218 | -3.879  | 1.0E-04 | 0.00049516 | Col6a3        |
| ENSMUSG00000040410  | 657.429   | -0.845 | 0.184 | -4.591  | 4.4E-06 | 2.5673E-05 | Fbx14         |
| ENSMUSG00000011884  | 16652.408 | -0.845 | 0.066 | -12.821 | 1.2E-37 | 4.7241E-36 | Gltf          |
| ENSMUSG00000043411  | 2451.754  | -0.846 | 0.097 | -8.764  | 1.9E-18 | 3.1232E-17 | Usp48         |
| ENSMUSG00000052336  | 2542.180  | -0.846 | 0.194 | -4.351  | 1.4E-05 | 7.3527E-05 | Cx3cr1        |
| ENSMUSG00000053929  | 525.337   | -0.847 | 0.222 | -3.811  | 1.4E-04 | 0.00064455 | Cyhr1         |
| ENSMUSG00000026675  | 480.362   | -0.847 | 0.285 | -2.969  | 3.0E-03 | 0.01076514 | Hsd17b7       |
| ENSMUSG00000045691  | 96.756    | -0.848 | 0.336 | -2.525  | 1.2E-02 | 0.03560412 | Thtpa         |
| ENSMUSG00000028069  | 948.194   | -0.849 | 0.182 | -4.671  | 3.0E-06 | 1.7861E-05 | Gpatch4       |
| ENSMUSG00000028085  | 599.967   | -0.850 | 0.197 | -4.318  | 1.6E-05 | 8.4756E-05 | Gatb          |
| ENSMUSG00000044763  | 1186.732  | -0.850 | 0.104 | -8.138  | 4.0E-16 | 5.7267E-15 | Trmt10c       |
| ENSMUSG00000040433  | 2982.671  | -0.850 | 0.137 | -6.229  | 4.7E-10 | 4.2401E-09 | Zbtb38        |
| ENSMUSG00000072825  | 367.251   | -0.850 | 0.342 | -2.485  | 1.3E-02 | 0.0393254  | Cep170b       |
| ENSMUSG00000034203  | 2682.457  | -0.850 | 0.127 | -6.673  | 2.5E-11 | 2.5233E-10 | Chchd4        |
| ENSMUSG00000025153  | 590.797   | -0.851 | 0.236 | -3.601  | 3.2E-04 | 0.00138269 | Fasn          |
| ENSMUSG00000036820  | 5128.520  | -0.851 | 0.114 | -7.450  | 9.3E-14 | 1.1386E-12 | Amdhd2        |
| ENSMUSG00000029722  | 1652.369  | -0.851 | 0.157 | -5.405  | 6.5E-08 | 4.7474E-07 | Agfg2         |
| ENSMUSG00000029247  | 3804.225  | -0.851 | 0.095 | -8.975  | 2.8E-19 | 4.955E-18  | Paics         |
| ENSMUSG00000044037  | 263.763   | -0.851 | 0.240 | -3.542  | 4.0E-04 | 0.00169928 | Als2cl        |
| ENSMUSG00000042737  | 1123.444  | -0.852 | 0.178 | -4.791  | 1.7E-06 | 1.0179E-05 | Dpm3          |

|                     |           |        |       |         |         |            |               |
|---------------------|-----------|--------|-------|---------|---------|------------|---------------|
| ENSMUSG00000038900  | 1721.126  | -0.853 | 0.159 | -5.353  | 8.6E-08 | 6.2236E-07 | Rpl12         |
| ENSMUSG00000042348  | 144.289   | -0.853 | 0.234 | -3.646  | 2.7E-04 | 0.0011806  | Arl15         |
| ENSMUSG00000047721  | 4003.917  | -0.853 | 0.150 | -5.693  | 1.2E-08 | 9.8333E-08 | Bola2         |
| ENSMUSG00000018395  | 1418.116  | -0.853 | 0.140 | -6.090  | 1.1E-09 | 9.8801E-09 | Kif3a         |
| ENSMUSG00000049858  | 264.395   | -0.853 | 0.322 | -2.654  | 8.0E-03 | 0.02562455 | Suox          |
| ENSMUSG00000046323  | 134.692   | -0.853 | 0.302 | -2.825  | 4.7E-03 | 0.01624917 | Dppa3         |
| ENSMUSG00000033423  | 3720.623  | -0.855 | 0.119 | -7.175  | 7.2E-13 | 8.2241E-12 | Eri3          |
| ENSMUSG00000036587  | 383.318   | -0.855 | 0.309 | -2.766  | 5.7E-03 | 0.01909536 | Fut7          |
| ENSMUSG00000034601  | 368.887   | -0.855 | 0.292 | -2.923  | 3.5E-03 | 0.01228498 | 2700049A03Rik |
| ENSMUSG00000038520  | 1836.954  | -0.855 | 0.137 | -6.253  | 4.0E-10 | 3.6735E-09 | Tbc1d17       |
| ENSMUSG00000001305  | 1358.539  | -0.856 | 0.130 | -6.596  | 4.2E-11 | 4.1629E-10 | Rrp15         |
| ENSMUSG00000074863  | 216.235   | -0.856 | 0.306 | -2.800  | 5.1E-03 | 0.01741155 | Platr25       |
| ENSMUSG00000070705  | 295.168   | -0.857 | 0.223 | -3.849  | 1.2E-04 | 0.00055495 | Eid2b         |
| ENSMUSG00000037089  | 5709.688  | -0.857 | 0.095 | -9.041  | 1.5E-19 | 2.7322E-18 | Slc35b2       |
| ENSMUSG00000069520  | 2455.941  | -0.857 | 0.086 | -9.941  | 2.8E-23 | 5.8975E-22 | Tmem19        |
| ENSMUSG00000022554  | 756.532   | -0.857 | 0.189 | -4.546  | 5.5E-06 | 3.1427E-05 | Hgh1          |
| ENSMUSG00000041912  | 273.980   | -0.858 | 0.280 | -3.064  | 2.2E-03 | 0.00810911 | Tdrkh         |
| ENSMUSG00000024081  | 1290.271  | -0.858 | 0.124 | -6.905  | 5.0E-12 | 5.3499E-11 | Cebpz         |
| ENSMUSG00000051675  | 755.765   | -0.859 | 0.235 | -3.654  | 2.6E-04 | 0.00114375 | Trim32        |
| ENSMUSG00000027371  | 287.950   | -0.859 | 0.342 | -2.509  | 1.2E-02 | 0.03700435 | Fahd2a        |
| ENSMUSG00000001056  | 6283.231  | -0.859 | 0.099 | -8.651  | 5.1E-18 | 8.2529E-17 | Nhp2          |
| ENSMUSG00000020328  | 2714.128  | -0.860 | 0.099 | -8.731  | 2.5E-18 | 4.1711E-17 | Nuded2        |
| ENSMUSG00000053801  | 1447.723  | -0.862 | 0.159 | -5.410  | 6.3E-08 | 4.6176E-07 | Grwd1         |
| ENSMUSG00000013622  | 1816.252  | -0.862 | 0.096 | -8.957  | 3.3E-19 | 5.7748E-18 | Atraid        |
| ENSMUSG00000029545  | 2811.443  | -0.862 | 0.101 | -8.545  | 1.3E-17 | 2.025E-16  | Acads         |
| ENSMUSG00000024646  | 15093.815 | -0.863 | 0.124 | -6.983  | 2.9E-12 | 3.1551E-11 | Cyb5a         |
| ENSMUSG00000020604  | 204.957   | -0.864 | 0.341 | -2.532  | 1.1E-02 | 0.03500214 | Arsg          |
| ENSMUSG00000037601  | 1968.233  | -0.864 | 0.154 | -5.623  | 1.9E-08 | 1.4512E-07 | Nme1          |
| ENSMUSG00000079260  | 853.129   | -0.864 | 0.194 | -4.458  | 8.3E-06 | 4.6349E-05 | Tmppe         |
| ENSMUSG00000097392  | 817.751   | -0.864 | 0.137 | -6.297  | 3.0E-10 | 2.8082E-09 | Thoc2l        |
| ENSMUSG00000022672  | 238.190   | -0.865 | 0.353 | -2.449  | 1.4E-02 | 0.04285336 | Prkdc         |
| ENSMUSG000000104623 | 119.905   | -0.866 | 0.218 | -3.965  | 7.4E-05 | 0.00035682 | Gm6394        |
| ENSMUSG00000029925  | 10739.156 | -0.868 | 0.111 | -7.812  | 5.6E-15 | 7.3839E-14 | Tbxas1        |
| ENSMUSG00000071647  | 1443.765  | -0.868 | 0.121 | -7.204  | 5.9E-13 | 6.758E-12  | Eml3          |
| ENSMUSG00000048874  | 1517.379  | -0.869 | 0.120 | -7.236  | 4.6E-13 | 5.3739E-12 | Phf3          |
| ENSMUSG00000016262  | 117.532   | -0.869 | 0.324 | -2.684  | 7.3E-03 | 0.02371933 | Sertad4       |
| ENSMUSG00000015597  | 629.603   | -0.870 | 0.211 | -4.127  | 3.7E-05 | 0.00018632 | Zfp318        |
| ENSMUSG00000035215  | 598.080   | -0.870 | 0.171 | -5.081  | 3.8E-07 | 2.4878E-06 | Lsm7          |
| ENSMUSG00000031671  | 450.223   | -0.870 | 0.252 | -3.449  | 5.6E-04 | 0.00233992 | Setd6         |
| ENSMUSG00000054237  | 723.965   | -0.870 | 0.125 | -6.971  | 3.1E-12 | 3.4171E-11 | Fra10ac1      |
| ENSMUSG000000106918 | 921.190   | -0.871 | 0.166 | -5.248  | 1.5E-07 | 1.074E-06  | Mrpl33        |
| ENSMUSG00000039263  | 3407.962  | -0.871 | 0.082 | -10.596 | 3.1E-26 | 7.4738E-25 | Npep11        |
| ENSMUSG00000024997  | 2769.625  | -0.871 | 0.081 | -10.817 | 2.8E-27 | 7.1523E-26 | Prdx3         |
| ENSMUSG00000029162  | 673.179   | -0.872 | 0.209 | -4.177  | 3.0E-05 | 0.00015184 | Khk           |
| ENSMUSG00000004929  | 1092.238  | -0.872 | 0.179 | -4.869  | 1.1E-06 | 7.0144E-06 | Thop1         |
| ENSMUSG00000020323  | 371.047   | -0.873 | 0.313 | -2.790  | 5.3E-03 | 0.01787264 | Prss57        |
| ENSMUSG00000028479  | 811.534   | -0.873 | 0.191 | -4.583  | 4.6E-06 | 2.6593E-05 | Gne           |
| ENSMUSG00000027259  | 245.256   | -0.874 | 0.296 | -2.955  | 3.1E-03 | 0.01120958 | Adal          |
| ENSMUSG00000021244  | 987.924   | -0.874 | 0.144 | -6.067  | 1.3E-09 | 1.1346E-08 | Ylpm1         |
| ENSMUSG00000038241  | 978.843   | -0.874 | 0.174 | -5.031  | 4.9E-07 | 3.176E-06  | Cep250        |
| ENSMUSG000000102135 | 113.873   | -0.874 | 0.234 | -3.744  | 1.8E-04 | 0.00082398 | Gm37108       |
| ENSMUSG00000025158  | 1014.001  | -0.875 | 0.166 | -5.280  | 1.3E-07 | 9.1259E-07 | Rfng          |

|                    |           |        |       |         |         |            |               |
|--------------------|-----------|--------|-------|---------|---------|------------|---------------|
| ENSMUSG00000057614 | 332.507   | -0.875 | 0.322 | -2.714  | 6.6E-03 | 0.02194447 | Gnai1         |
| ENSMUSG00000037366 | 764.036   | -0.875 | 0.181 | -4.844  | 1.3E-06 | 7.921E-06  | Pafah2        |
| ENSMUSG00000032633 | 3237.979  | -0.875 | 0.151 | -5.779  | 7.5E-09 | 6.0651E-08 | Fln           |
| ENSMUSG00000008855 | 2669.863  | -0.876 | 0.136 | -6.447  | 1.1E-10 | 1.0889E-09 | Hdac5         |
| ENSMUSG00000020895 | 183.862   | -0.876 | 0.360 | -2.437  | 1.5E-02 | 0.04417485 | Tmem107       |
| ENSMUSG00000026956 | 13513.739 | -0.877 | 0.073 | -11.929 | 8.4E-33 | 2.6626E-31 | Uap111        |
| ENSMUSG00000007827 | 445.816   | -0.877 | 0.257 | -3.413  | 6.4E-04 | 0.00263728 | Ankrd26       |
| ENSMUSG00000007950 | 1110.967  | -0.877 | 0.227 | -3.858  | 1.1E-04 | 0.00053698 | Abhd8         |
| ENSMUSG00000025962 | 1056.549  | -0.877 | 0.142 | -6.163  | 7.1E-10 | 6.3694E-09 | Fastkd2       |
| ENSMUSG00000105388 | 113.488   | -0.877 | 0.253 | -3.471  | 5.2E-04 | 0.00216494 | Rpl36a-ps2    |
| ENSMUSG00000020101 | 6937.423  | -0.877 | 0.111 | -7.877  | 3.4E-15 | 4.5125E-14 | Vsir          |
| ENSMUSG00000040681 | 4521.297  | -0.878 | 0.087 | -10.128 | 4.2E-24 | 9.209E-23  | Hmgn1         |
| ENSMUSG00000001120 | 200.278   | -0.878 | 0.348 | -2.521  | 1.2E-02 | 0.03595055 | Pcbp3         |
| ENSMUSG00000025503 | 51625.430 | -0.878 | 0.079 | -11.103 | 1.2E-28 | 3.2531E-27 | Taldo1        |
| ENSMUSG00000031748 | 113.140   | -0.878 | 0.361 | -2.431  | 1.5E-02 | 0.04480459 | Gnao1         |
| ENSMUSG00000032481 | 3552.160  | -0.879 | 0.116 | -7.599  | 3.0E-14 | 3.7617E-13 | Smarcc1       |
| ENSMUSG00000040111 | 911.685   | -0.880 | 0.198 | -4.438  | 9.1E-06 | 5.067E-05  | Gramd1b       |
| ENSMUSG00000034247 | 3970.055  | -0.880 | 0.130 | -6.770  | 1.3E-11 | 1.3205E-10 | Plekhl1       |
| ENSMUSG00000029616 | 7921.772  | -0.881 | 0.076 | -11.541 | 8.2E-31 | 2.3898E-29 | Erp29         |
| ENSMUSG00000041132 | 1098.569  | -0.882 | 0.152 | -5.802  | 6.6E-09 | 5.3291E-08 | N4bp211       |
| ENSMUSG00000027634 | 1117.687  | -0.882 | 0.177 | -4.982  | 6.3E-07 | 4.0575E-06 | Ndrp3         |
| ENSMUSG00000025538 | 1062.389  | -0.882 | 0.122 | -7.223  | 5.1E-13 | 5.8753E-12 | Sumf2         |
| ENSMUSG00000015337 | 314.051   | -0.882 | 0.230 | -3.832  | 1.3E-04 | 0.0005942  | Endog         |
| ENSMUSG00000032440 | 3839.978  | -0.883 | 0.123 | -7.201  | 6.0E-13 | 6.8722E-12 | Tgfbp2        |
| ENSMUSG00000047250 | 3876.701  | -0.883 | 0.162 | -5.455  | 4.9E-08 | 3.6215E-07 | Ptgs1         |
| ENSMUSG00000004317 | 2283.202  | -0.883 | 0.164 | -5.384  | 7.3E-08 | 5.2889E-07 | Clen5         |
| ENSMUSG00000020818 | 4175.787  | -0.883 | 0.115 | -7.700  | 1.4E-14 | 1.7448E-13 | Mfsd11        |
| ENSMUSG00000004667 | 4226.578  | -0.883 | 0.101 | -8.778  | 1.7E-18 | 2.7781E-17 | Polr2e        |
| ENSMUSG00000030802 | 3501.204  | -0.884 | 0.069 | -12.779 | 2.1E-37 | 8.081E-36  | Bckdk         |
| ENSMUSG00000022426 | 961.726   | -0.884 | 0.158 | -5.598  | 2.2E-08 | 1.6666E-07 | Josd1         |
| ENSMUSG00000024925 | 2130.090  | -0.884 | 0.131 | -6.739  | 1.6E-11 | 1.628E-10  | Rnaseh2c      |
| ENSMUSG00000024978 | 674.616   | -0.885 | 0.244 | -3.622  | 2.9E-04 | 0.00128152 | Gpam          |
| ENSMUSG00000042015 | 2712.145  | -0.885 | 0.153 | -5.771  | 7.9E-09 | 6.344E-08  | Wdr41         |
| ENSMUSG00000029536 | 1274.237  | -0.886 | 0.173 | -5.124  | 3.0E-07 | 2.0088E-06 | Gatc          |
| ENSMUSG00000002308 | 768.296   | -0.886 | 0.164 | -5.399  | 6.7E-08 | 4.8942E-07 | Cd320         |
| ENSMUSG00000032396 | 845.493   | -0.887 | 0.193 | -4.594  | 4.3E-06 | 2.5271E-05 | Dis3l         |
| ENSMUSG00000051768 | 1421.952  | -0.887 | 0.136 | -6.519  | 7.1E-11 | 6.868E-10  | Xrcc1         |
| ENSMUSG00000038845 | 1927.638  | -0.887 | 0.123 | -7.236  | 4.6E-13 | 5.3771E-12 | Phb           |
| ENSMUSG00000059851 | 1107.441  | -0.887 | 0.201 | -4.411  | 1.0E-05 | 5.6721E-05 | Kmt5c         |
| ENSMUSG00000037784 | 157.070   | -0.888 | 0.365 | -2.433  | 1.5E-02 | 0.04460295 | Dzip11        |
| ENSMUSG00000084108 | 50.623    | -0.889 | 0.347 | -2.562  | 1.0E-02 | 0.03236225 | Gm15794       |
| ENSMUSG00000024194 | 3636.427  | -0.889 | 0.091 | -9.742  | 2.0E-22 | 4.0742E-21 | Cuta          |
| ENSMUSG00000027996 | 603.743   | -0.889 | 0.285 | -3.124  | 1.8E-03 | 0.00672855 | Sfrp2         |
| ENSMUSG00000032449 | 1894.814  | -0.890 | 0.155 | -5.729  | 1.0E-08 | 8.0415E-08 | Slc25a36      |
| ENSMUSG00000037370 | 2657.952  | -0.891 | 0.133 | -6.709  | 2.0E-11 | 1.9873E-10 | Enpp1         |
| ENSMUSG00000079144 | 430.203   | -0.891 | 0.196 | -4.556  | 5.2E-06 | 3.0019E-05 | A130010J15Rik |
| ENSMUSG00000045519 | 367.905   | -0.891 | 0.276 | -3.229  | 1.2E-03 | 0.0048422  | Zfp560        |
| ENSMUSG00000022544 | 958.907   | -0.891 | 0.142 | -6.257  | 3.9E-10 | 3.5885E-09 | Eef2kmt       |
| ENSMUSG00000026811 | 1442.162  | -0.893 | 0.119 | -7.487  | 7.0E-14 | 8.6543E-13 | St6galnac6    |
| ENSMUSG00000042660 | 1418.596  | -0.893 | 0.133 | -6.708  | 2.0E-11 | 1.9972E-10 | Wdr55         |
| ENSMUSG00000029587 | 357.474   | -0.893 | 0.343 | -2.607  | 9.1E-03 | 0.0288884  | Zfp12         |
| ENSMUSG00000020189 | 6674.566  | -0.893 | 0.141 | -6.349  | 2.2E-10 | 2.033E-09  | Osbp18        |

|                    |           |        |       |         |         |            |         |
|--------------------|-----------|--------|-------|---------|---------|------------|---------|
| ENSMUSG00000037353 | 1504.766  | -0.893 | 0.153 | -5.825  | 5.7E-09 | 4.686E-08  | Letmd1  |
| ENSMUSG00000036985 | 3048.378  | -0.895 | 0.109 | -8.237  | 1.8E-16 | 2.5787E-15 | Zdhhc9  |
| ENSMUSG00000020022 | 3472.319  | -0.896 | 0.101 | -8.853  | 8.6E-19 | 1.4486E-17 | Ndufa12 |
| ENSMUSG00000022364 | 470.710   | -0.896 | 0.268 | -3.339  | 8.4E-04 | 0.00337823 | Tbc1d31 |
| ENSMUSG00000017485 | 1381.750  | -0.896 | 0.133 | -6.723  | 1.8E-11 | 1.8155E-10 | Top2b   |
| ENSMUSG00000085711 | 74.135    | -0.897 | 0.331 | -2.711  | 6.7E-03 | 0.02212048 | Gm15163 |
| ENSMUSG00000039197 | 1079.620  | -0.898 | 0.143 | -6.282  | 3.3E-10 | 3.0748E-09 | Adk     |
| ENSMUSG00000004069 | 2423.102  | -0.898 | 0.111 | -8.113  | 4.9E-16 | 7.0269E-15 | Dnaja3  |
| ENSMUSG00000019810 | 4655.223  | -0.898 | 0.097 | -9.254  | 2.2E-20 | 4.014E-19  | Fuca2   |
| ENSMUSG00000039145 | 1375.051  | -0.898 | 0.120 | -7.501  | 6.3E-14 | 7.8273E-13 | Camk1d  |
| ENSMUSG00000018446 | 4941.820  | -0.898 | 0.108 | -8.328  | 8.2E-17 | 1.235E-15  | C1qbp   |
| ENSMUSG00000079508 | 201.276   | -0.899 | 0.196 | -4.591  | 4.4E-06 | 2.563E-05  | Apoo    |
| ENSMUSG00000020329 | 978.090   | -0.899 | 0.242 | -3.709  | 2.1E-04 | 0.00093598 | Polrmt  |
| ENSMUSG00000000295 | 424.232   | -0.900 | 0.228 | -3.952  | 7.7E-05 | 0.00037406 | Hdde2   |
| ENSMUSG00000030590 | 157.890   | -0.901 | 0.250 | -3.602  | 3.2E-04 | 0.00137461 | Fam98c  |
| ENSMUSG00000020877 | 127.521   | -0.902 | 0.376 | -2.398  | 1.6E-02 | 0.04857512 | Scrn2   |
| ENSMUSG00000000884 | 223.025   | -0.902 | 0.360 | -2.505  | 1.2E-02 | 0.03741974 | Gnb11   |
| ENSMUSG00000031730 | 637.856   | -0.903 | 0.175 | -5.158  | 2.5E-07 | 1.6951E-06 | Dhodh   |
| ENSMUSG00000004032 | 278.151   | -0.903 | 0.188 | -4.810  | 1.5E-06 | 9.3019E-06 | Gstm5   |
| ENSMUSG00000052751 | 817.969   | -0.903 | 0.189 | -4.791  | 1.7E-06 | 1.0175E-05 | Repin1  |
| ENSMUSG00000025630 | 9219.968  | -0.904 | 0.074 | -12.201 | 3.1E-34 | 1.0214E-32 | Hprt    |
| ENSMUSG00000026456 | 2696.207  | -0.904 | 0.116 | -7.802  | 6.1E-15 | 7.9955E-14 | Cyb5r1  |
| ENSMUSG00000026958 | 4044.280  | -0.904 | 0.093 | -9.764  | 1.6E-22 | 3.312E-21  | Dpp7    |
| ENSMUSG00000006471 | 219.943   | -0.904 | 0.237 | -3.823  | 1.3E-04 | 0.000614   | Ndor1   |
| ENSMUSG00000031657 | 1032.894  | -0.904 | 0.161 | -5.619  | 1.9E-08 | 1.4881E-07 | Heatr3  |
| ENSMUSG00000026278 | 1176.817  | -0.904 | 0.180 | -5.038  | 4.7E-07 | 3.0808E-06 | Bok     |
| ENSMUSG00000021079 | 804.881   | -0.905 | 0.181 | -5.007  | 5.5E-07 | 3.5869E-06 | Timm9   |
| ENSMUSG00000002781 | 218.962   | -0.905 | 0.249 | -3.642  | 2.7E-04 | 0.00119677 | Tmem143 |
| ENSMUSG00000019822 | 603.506   | -0.906 | 0.211 | -4.288  | 1.8E-05 | 9.6216E-05 | Smpd2   |
| ENSMUSG00000025869 | 2552.164  | -0.906 | 0.136 | -6.675  | 2.5E-11 | 2.4856E-10 | Nop16   |
| ENSMUSG00000022228 | 1634.772  | -0.906 | 0.104 | -8.678  | 4.0E-18 | 6.5776E-17 | Zscan26 |
| ENSMUSG00000020087 | 2357.774  | -0.908 | 0.160 | -5.677  | 1.4E-08 | 1.0755E-07 | Tysnd1  |
| ENSMUSG00000068134 | 949.363   | -0.908 | 0.126 | -7.212  | 5.5E-13 | 6.3499E-12 | Zfp120  |
| ENSMUSG00000028443 | 908.220   | -0.908 | 0.111 | -8.166  | 3.2E-16 | 4.5676E-15 | Nudt2   |
| ENSMUSG00000031969 | 1382.941  | -0.909 | 0.134 | -6.792  | 1.1E-11 | 1.1414E-10 | Acad8   |
| ENSMUSG00000075415 | 5397.242  | -0.910 | 0.111 | -8.173  | 3.0E-16 | 4.3543E-15 | Fnbp1   |
| ENSMUSG00000018750 | 465.796   | -0.911 | 0.214 | -4.256  | 2.1E-05 | 0.00010972 | Zbtb4   |
| ENSMUSG00000031563 | 1768.206  | -0.911 | 0.118 | -7.698  | 1.4E-14 | 1.77E-13   | Wwc2    |
| ENSMUSG00000092014 | 137.871   | -0.911 | 0.276 | -3.303  | 9.6E-04 | 0.00380869 | Gm4468  |
| ENSMUSG00000013275 | 761.353   | -0.912 | 0.176 | -5.169  | 2.4E-07 | 1.6035E-06 | Slc41a1 |
| ENSMUSG00000030246 | 885.831   | -0.912 | 0.199 | -4.572  | 4.8E-06 | 2.7932E-05 | Ldhb    |
| ENSMUSG00000018548 | 605.299   | -0.912 | 0.246 | -3.710  | 2.1E-04 | 0.00093425 | Trim37  |
| ENSMUSG00000028551 | 582.286   | -0.912 | 0.199 | -4.589  | 4.4E-06 | 2.5851E-05 | Cdkn2c  |
| ENSMUSG00000039254 | 753.027   | -0.913 | 0.234 | -3.907  | 9.3E-05 | 0.00044524 | Pomt1   |
| ENSMUSG00000036781 | 10807.688 | -0.913 | 0.110 | -8.271  | 1.3E-16 | 1.959E-15  | Rps271  |
| ENSMUSG00000030315 | 1542.257  | -0.914 | 0.163 | -5.604  | 2.1E-08 | 1.6192E-07 | Vgll4   |
| ENSMUSG00000005142 | 29930.405 | -0.915 | 0.095 | -9.645  | 5.1E-22 | 1.0321E-20 | Man2b1  |
| ENSMUSG00000073609 | 208.840   | -0.915 | 0.301 | -3.042  | 2.4E-03 | 0.00865942 | D2hgdh  |
| ENSMUSG00000005949 | 955.711   | -0.916 | 0.165 | -5.536  | 3.1E-08 | 2.3366E-07 | Ctns    |
| ENSMUSG00000054000 | 515.871   | -0.916 | 0.341 | -2.686  | 7.2E-03 | 0.02354644 | Tuscl   |
| ENSMUSG00000026335 | 3143.897  | -0.916 | 0.114 | -8.004  | 1.2E-15 | 1.6577E-14 | Pam     |
| ENSMUSG00000024169 | 303.829   | -0.917 | 0.290 | -3.161  | 1.6E-03 | 0.00601179 | Ift140  |

|                    |           |        |       |        |         |            |               |
|--------------------|-----------|--------|-------|--------|---------|------------|---------------|
| ENSMUSG00000024120 | 1277.891  | -0.917 | 0.166 | -5.541 | 3.0E-08 | 2.2858E-07 | Lrpprc        |
| ENSMUSG00000063457 | 7059.661  | -0.918 | 0.139 | -6.601 | 4.1E-11 | 4.0507E-10 | Rps15         |
| ENSMUSG00000052934 | 1309.516  | -0.918 | 0.124 | -7.411 | 1.3E-13 | 1.5191E-12 | Fbxo31        |
| ENSMUSG00000028378 | 2777.430  | -0.918 | 0.176 | -5.223 | 1.8E-07 | 1.2214E-06 | Ptgr1         |
| ENSMUSG00000022807 | 5643.645  | -0.919 | 0.130 | -7.044 | 1.9E-12 | 2.0597E-11 | Osbp111       |
| ENSMUSG00000023830 | 1407.109  | -0.919 | 0.133 | -6.913 | 4.7E-12 | 5.0601E-11 | Igf2r         |
| ENSMUSG00000112646 | 72.703    | -0.920 | 0.290 | -3.167 | 1.5E-03 | 0.00590156 | Gm5654        |
| ENSMUSG00000051890 | 154.267   | -0.920 | 0.341 | -2.696 | 7.0E-03 | 0.02298421 | Klhdc1        |
| ENSMUSG00000045055 | 116.313   | -0.920 | 0.299 | -3.075 | 2.1E-03 | 0.00782925 | Rpsa-ps2      |
| ENSMUSG00000045107 | 781.362   | -0.920 | 0.133 | -6.905 | 5.0E-12 | 5.3392E-11 | Saysd1        |
| ENSMUSG00000045160 | 1560.502  | -0.920 | 0.141 | -6.541 | 6.1E-11 | 5.9708E-10 | Bola3         |
| ENSMUSG00000045730 | 800.343   | -0.920 | 0.195 | -4.727 | 2.3E-06 | 1.3742E-05 | Adrb2         |
| ENSMUSG00000016940 | 546.468   | -0.920 | 0.177 | -5.213 | 1.9E-07 | 1.2863E-06 | Kctd2         |
| ENSMUSG00000033161 | 22255.184 | -0.921 | 0.098 | -9.434 | 3.9E-21 | 7.5575E-20 | Atp1a1        |
| ENSMUSG00000049553 | 874.044   | -0.922 | 0.138 | -6.684 | 2.3E-11 | 2.3515E-10 | Polr1a        |
| ENSMUSG00000004085 | 1388.878  | -0.923 | 0.134 | -6.883 | 5.8E-12 | 6.1826E-11 | Map3k20       |
| ENSMUSG00000067722 | 1408.233  | -0.923 | 0.112 | -8.244 | 1.7E-16 | 2.4426E-15 | BC003965      |
| ENSMUSG00000032123 | 3302.942  | -0.924 | 0.105 | -8.836 | 9.9E-19 | 1.6688E-17 | Dpagt1        |
| ENSMUSG00000021392 | 684.511   | -0.924 | 0.160 | -5.768 | 8.0E-09 | 6.4377E-08 | Nol8          |
| ENSMUSG00000042050 | 217.729   | -0.925 | 0.374 | -2.471 | 1.3E-02 | 0.0405999  | Dync2i1       |
| ENSMUSG00000036564 | 222.875   | -0.926 | 0.365 | -2.539 | 1.1E-02 | 0.03439082 | Ndrp4         |
| ENSMUSG00000015846 | 837.869   | -0.926 | 0.304 | -3.042 | 2.4E-03 | 0.00866854 | Rxra          |
| ENSMUSG00000020190 | 5418.788  | -0.926 | 0.128 | -7.226 | 5.0E-13 | 5.7554E-12 | Mknk2         |
| ENSMUSG00000026585 | 1156.459  | -0.926 | 0.148 | -6.265 | 3.7E-10 | 3.4267E-09 | Kifap3        |
| ENSMUSG00000018931 | 728.379   | -0.926 | 0.202 | -4.574 | 4.8E-06 | 2.7716E-05 | Natd1         |
| ENSMUSG00000024986 | 1065.925  | -0.926 | 0.146 | -6.343 | 2.3E-10 | 2.1076E-09 | Hhex          |
| ENSMUSG00000025572 | 1233.795  | -0.927 | 0.163 | -5.695 | 1.2E-08 | 9.7528E-08 | Tmc6          |
| ENSMUSG00000030218 | 1721.004  | -0.928 | 0.170 | -5.472 | 4.4E-08 | 3.3127E-07 | Mgp           |
| ENSMUSG00000021477 | 76625.276 | -0.929 | 0.172 | -5.403 | 6.6E-08 | 4.7849E-07 | Ctsl          |
| ENSMUSG00000032733 | 611.919   | -0.931 | 0.191 | -4.865 | 1.1E-06 | 7.1641E-06 | Snx33         |
| ENSMUSG00000037847 | 518.735   | -0.932 | 0.195 | -4.779 | 1.8E-06 | 1.0765E-05 | Nmrk1         |
| ENSMUSG00000030956 | 1570.594  | -0.932 | 0.163 | -5.733 | 9.9E-09 | 7.88E-08   | Fam53b        |
| ENSMUSG00000062661 | 1144.398  | -0.933 | 0.193 | -4.832 | 1.3E-06 | 8.3586E-06 | Ncs1          |
| ENSMUSG00000062604 | 1930.612  | -0.933 | 0.155 | -6.006 | 1.9E-09 | 1.6356E-08 | Srpk2         |
| ENSMUSG00000032657 | 595.323   | -0.934 | 0.198 | -4.706 | 2.5E-06 | 1.5201E-05 | Fam189b       |
| ENSMUSG00000046441 | 561.099   | -0.934 | 0.300 | -3.109 | 1.9E-03 | 0.00705494 | Cmtr2         |
| ENSMUSG00000033102 | 415.771   | -0.935 | 0.250 | -3.740 | 1.8E-04 | 0.00083778 | Cdc14b        |
| ENSMUSG00000022217 | 651.525   | -0.935 | 0.186 | -5.018 | 5.2E-07 | 3.3937E-06 | Emc9          |
| ENSMUSG00000049598 | 696.383   | -0.936 | 0.225 | -4.155 | 3.3E-05 | 0.0001664  | Vsig8         |
| ENSMUSG00000112639 | 62.913    | -0.936 | 0.369 | -2.536 | 1.1E-02 | 0.03458624 | A730063M14Rik |
| ENSMUSG00000040918 | 812.312   | -0.936 | 0.238 | -3.928 | 8.6E-05 | 0.00041176 | Slc19a2       |
| ENSMUSG00000067818 | 5037.233  | -0.937 | 0.154 | -6.076 | 1.2E-09 | 1.0779E-08 | My19          |
| ENSMUSG00000032046 | 14515.278 | -0.937 | 0.109 | -8.612 | 7.2E-18 | 1.1464E-16 | Abhd12        |
| ENSMUSG00000102353 | 231.011   | -0.937 | 0.315 | -2.974 | 2.9E-03 | 0.01061768 | Gm38345       |
| ENSMUSG00000030094 | 1031.785  | -0.937 | 0.176 | -5.311 | 1.1E-07 | 7.767E-07  | Xpc           |
| ENSMUSG00000075268 | 113.556   | -0.938 | 0.353 | -2.654 | 8.0E-03 | 0.02564923 | Gm10819       |
| ENSMUSG00000038335 | 741.482   | -0.938 | 0.151 | -6.201 | 5.6E-10 | 5.0294E-09 | Tsrl          |
| ENSMUSG00000037300 | 2408.447  | -0.938 | 0.137 | -6.827 | 8.7E-12 | 9.0562E-11 | Ttc13         |
| ENSMUSG00000082626 | 153.369   | -0.939 | 0.223 | -4.211 | 2.5E-05 | 0.00013229 | Rps13-ps5     |
| ENSMUSG00000054942 | 168.838   | -0.939 | 0.346 | -2.716 | 6.6E-03 | 0.02181631 | Migal         |
| ENSMUSG00000060152 | 1124.806  | -0.939 | 0.144 | -6.536 | 6.3E-11 | 6.1716E-10 | Pop5          |
| ENSMUSG00000026047 | 575.304   | -0.940 | 0.139 | -6.764 | 1.3E-11 | 1.3789E-10 | Poglut2       |

|                    |           |        |       |        |         |            |               |
|--------------------|-----------|--------|-------|--------|---------|------------|---------------|
| ENSMUSG00000046861 | 1118.692  | -0.940 | 0.182 | -5.163 | 2.4E-07 | 1.6574E-06 | Hectd3        |
| ENSMUSG00000040321 | 143.582   | -0.941 | 0.345 | -2.724 | 6.4E-03 | 0.02134633 | Zfp770        |
| ENSMUSG00000001942 | 892.281   | -0.941 | 0.193 | -4.878 | 1.1E-06 | 6.7327E-06 | Siae          |
| ENSMUSG00000026782 | 1334.722  | -0.941 | 0.133 | -7.083 | 1.4E-12 | 1.5686E-11 | Abi2          |
| ENSMUSG00000036046 | 1133.850  | -0.941 | 0.209 | -4.498 | 6.9E-06 | 3.8987E-05 | 5031439G07Rik |
| ENSMUSG00000037904 | 506.760   | -0.942 | 0.196 | -4.809 | 1.5E-06 | 9.3411E-06 | Ankrd9        |
| ENSMUSG00000046997 | 348.741   | -0.942 | 0.272 | -3.471 | 5.2E-04 | 0.00216975 | Spsb4         |
| ENSMUSG00000022540 | 1061.323  | -0.942 | 0.136 | -6.936 | 4.0E-12 | 4.3386E-11 | Rogdi         |
| ENSMUSG00000029036 | 2576.050  | -0.942 | 0.123 | -7.632 | 2.3E-14 | 2.9348E-13 | Atad3a        |
| ENSMUSG00000026781 | 1708.778  | -0.943 | 0.105 | -8.963 | 3.2E-19 | 5.5054E-18 | Acbd5         |
| ENSMUSG00000029763 | 1877.246  | -0.943 | 0.136 | -6.916 | 4.7E-12 | 4.9841E-11 | Exoc4         |
| ENSMUSG00000000253 | 489.713   | -0.943 | 0.248 | -3.797 | 1.5E-04 | 0.00067814 | Gmpr          |
| ENSMUSG00000090035 | 370.505   | -0.944 | 0.217 | -4.345 | 1.4E-05 | 7.5425E-05 | Galnt4        |
| ENSMUSG00000061410 | 238.166   | -0.945 | 0.335 | -2.822 | 4.8E-03 | 0.01639994 | Zcchc14       |
| ENSMUSG00000073664 | 788.670   | -0.945 | 0.167 | -5.674 | 1.4E-08 | 1.0968E-07 | Nbeal1        |
| ENSMUSG00000017664 | 3669.940  | -0.946 | 0.133 | -7.118 | 1.1E-12 | 1.2255E-11 | Slc35c2       |
| ENSMUSG00000073889 | 2346.339  | -0.947 | 0.103 | -9.153 | 5.6E-20 | 1.0047E-18 | Il11ra1       |
| ENSMUSG00000001569 | 1730.854  | -0.948 | 0.138 | -6.858 | 7.0E-12 | 7.3295E-11 | Nom1          |
| ENSMUSG00000029166 | 302.686   | -0.948 | 0.288 | -3.286 | 1.0E-03 | 0.00402957 | Mapre3        |
| ENSMUSG00000017390 | 220.461   | -0.948 | 0.309 | -3.065 | 2.2E-03 | 0.00806988 | Aldoc         |
| ENSMUSG00000021958 | 519.555   | -0.949 | 0.179 | -5.296 | 1.2E-07 | 8.3756E-07 | Pinx1         |
| ENSMUSG00000085897 | 54.194    | -0.950 | 0.343 | -2.769 | 5.6E-03 | 0.01891916 | Gm11604       |
| ENSMUSG00000024597 | 127.528   | -0.951 | 0.373 | -2.547 | 1.1E-02 | 0.0336364  | Slc12a2       |
| ENSMUSG00000025870 | 599.209   | -0.952 | 0.203 | -4.689 | 2.7E-06 | 1.6416E-05 | Arl10         |
| ENSMUSG00000007872 | 10831.600 | -0.952 | 0.106 | -8.974 | 2.9E-19 | 4.976E-18  | Id3           |
| ENSMUSG00000028164 | 1304.766  | -0.953 | 0.171 | -5.563 | 2.6E-08 | 2.0211E-07 | Manba         |
| ENSMUSG00000035049 | 765.033   | -0.953 | 0.239 | -3.981 | 6.9E-05 | 0.00033566 | Rrp12         |
| ENSMUSG00000024170 | 856.846   | -0.954 | 0.260 | -3.667 | 2.5E-04 | 0.00109245 | Telo2         |
| ENSMUSG00000022120 | 425.549   | -0.954 | 0.244 | -3.912 | 9.2E-05 | 0.00043694 | Obi1          |
| ENSMUSG00000089715 | 242.613   | -0.954 | 0.339 | -2.817 | 4.8E-03 | 0.01660073 | Cbx6          |
| ENSMUSG00000045767 | 3029.537  | -0.955 | 0.132 | -7.215 | 5.4E-13 | 6.2096E-12 | B230219D22Rik |
| ENSMUSG00000001313 | 215.223   | -0.955 | 0.336 | -2.844 | 4.5E-03 | 0.01540025 | Rnd2          |
| ENSMUSG00000023259 | 435.567   | -0.955 | 0.362 | -2.641 | 8.3E-03 | 0.02649449 | Slc26a6       |
| ENSMUSG00000067924 | 259.109   | -0.956 | 0.201 | -4.750 | 2.0E-06 | 1.2334E-05 | Rtl8b         |
| ENSMUSG00000040596 | 575.096   | -0.956 | 0.229 | -4.171 | 3.0E-05 | 0.00015542 | Pogk          |
| ENSMUSG00000026694 | 541.985   | -0.956 | 0.192 | -4.987 | 6.1E-07 | 3.9558E-06 | Eef1aknmt     |
| ENSMUSG00000023150 | 2412.763  | -0.956 | 0.128 | -7.493 | 6.7E-14 | 8.2745E-13 | Ivns1abp      |
| ENSMUSG00000087403 | 532.874   | -0.958 | 0.278 | -3.445 | 5.7E-04 | 0.00237204 | Kantr         |
| ENSMUSG00000046658 | 161.504   | -0.958 | 0.400 | -2.394 | 1.7E-02 | 0.04899196 | Zfp316        |
| ENSMUSG00000038286 | 630.825   | -0.959 | 0.155 | -6.200 | 5.7E-10 | 5.0765E-09 | Bphl          |
| ENSMUSG00000031508 | 1135.136  | -0.959 | 0.181 | -5.295 | 1.2E-07 | 8.4347E-07 | Ankrd10       |
| ENSMUSG00000026490 | 343.807   | -0.959 | 0.246 | -3.896 | 9.8E-05 | 0.00046368 | Cdc42bpa      |
| ENSMUSG00000029059 | 2145.849  | -0.960 | 0.137 | -7.027 | 2.1E-12 | 2.3234E-11 | Prxl2b        |
| ENSMUSG00000021876 | 1092.212  | -0.960 | 0.140 | -6.846 | 7.6E-12 | 7.9706E-11 | Rnase4        |
| ENSMUSG00000042354 | 2144.831  | -0.962 | 0.114 | -8.470 | 2.5E-17 | 3.7913E-16 | Gnl3          |
| ENSMUSG00000071648 | 210.685   | -0.962 | 0.358 | -2.689 | 7.2E-03 | 0.02336317 | Rom1          |
| ENSMUSG00000060301 | 234.712   | -0.964 | 0.302 | -3.194 | 1.4E-03 | 0.00541317 | 2610008E11Rik |
| ENSMUSG00000036918 | 3080.593  | -0.965 | 0.123 | -7.844 | 4.4E-15 | 5.784E-14  | Ttc7          |
| ENSMUSG00000038205 | 412.347   | -0.965 | 0.231 | -4.168 | 3.1E-05 | 0.00015767 | Prkab2        |
| ENSMUSG00000040532 | 676.172   | -0.965 | 0.177 | -5.463 | 4.7E-08 | 3.4785E-07 | Abhd11        |
| ENSMUSG00000034462 | 740.500   | -0.965 | 0.257 | -3.762 | 1.7E-04 | 0.00077118 | Pkd2          |
| ENSMUSG00000117917 | 54.609    | -0.966 | 0.358 | -2.696 | 7.0E-03 | 0.0229643  | Gm18087       |



|                     |           |        |       |         |         |            |          |
|---------------------|-----------|--------|-------|---------|---------|------------|----------|
| ENSMUSG0000001039   | 106.582   | -0.967 | 0.363 | -2.663  | 7.7E-03 | 0.02501023 | B9d1     |
| ENSMUSG00000028696  | 196.577   | -0.967 | 0.348 | -2.780  | 5.4E-03 | 0.01837305 | Ipp      |
| ENSMUSG00000046791  | 1216.958  | -0.969 | 0.128 | -7.594  | 3.1E-14 | 3.9022E-13 | Riox1    |
| ENSMUSG00000023990  | 2451.656  | -0.970 | 0.177 | -5.492  | 4.0E-08 | 2.9664E-07 | Tfeb     |
| ENSMUSG00000002957  | 5999.114  | -0.971 | 0.107 | -9.060  | 1.3E-19 | 2.3174E-18 | Ap2a2    |
| ENSMUSG00000046573  | 1639.235  | -0.972 | 0.114 | -8.501  | 1.9E-17 | 2.9387E-16 | Lymr4    |
| ENSMUSG00000001138  | 224.443   | -0.972 | 0.218 | -4.456  | 8.3E-06 | 4.6781E-05 | Cnm3     |
| ENSMUSG00000024790  | 1644.225  | -0.973 | 0.145 | -6.699  | 2.1E-11 | 2.1257E-10 | Sac3d1   |
| ENSMUSG00000021668  | 687.405   | -0.973 | 0.192 | -5.061  | 4.2E-07 | 2.7335E-06 | Polk     |
| ENSMUSG00000068220  | 49324.331 | -0.974 | 0.108 | -8.987  | 2.5E-19 | 4.4499E-18 | Lgals1   |
| ENSMUSG00000046865  | 1313.509  | -0.974 | 0.133 | -7.327  | 2.4E-13 | 2.7987E-12 | Fbl      |
| ENSMUSG00000043140  | 589.705   | -0.974 | 0.178 | -5.475  | 4.4E-08 | 3.2629E-07 | Tmem186  |
| ENSMUSG00000028803  | 175.129   | -0.975 | 0.345 | -2.825  | 4.7E-03 | 0.01624014 | Nipal3   |
| ENSMUSG00000041801  | 5137.927  | -0.975 | 0.114 | -8.564  | 1.1E-17 | 1.7389E-16 | Phlda3   |
| ENSMUSG00000021846  | 634.775   | -0.975 | 0.223 | -4.381  | 1.2E-05 | 6.4813E-05 | Peli2    |
| ENSMUSG00000046808  | 395.100   | -0.976 | 0.210 | -4.650  | 3.3E-06 | 1.9692E-05 | Atp10d   |
| ENSMUSG00000024726  | 607.281   | -0.976 | 0.166 | -5.877  | 4.2E-09 | 3.4749E-08 | Carnmt1  |
| ENSMUSG00000023349  | 48874.956 | -0.976 | 0.115 | -8.468  | 2.5E-17 | 3.8418E-16 | Clec4n   |
| ENSMUSG00000067873  | 1485.441  | -0.977 | 0.125 | -7.813  | 5.6E-15 | 7.3309E-14 | Htatsf1  |
| ENSMUSG000000113204 | 195.291   | -0.978 | 0.319 | -3.065  | 2.2E-03 | 0.0080719  | Gm46430  |
| ENSMUSG00000097705  | 617.738   | -0.978 | 0.142 | -6.892  | 5.5E-12 | 5.8472E-11 | Gm26740  |
| ENSMUSG00000041426  | 496.557   | -0.978 | 0.287 | -3.405  | 6.6E-04 | 0.00270948 | Hibch    |
| ENSMUSG00000025893  | 221.715   | -0.979 | 0.201 | -4.876  | 1.1E-06 | 6.7887E-06 | Kbtbd3   |
| ENSMUSG00000066233  | 213.108   | -0.979 | 0.254 | -3.853  | 1.2E-04 | 0.0005468  | Tmem42   |
| ENSMUSG00000048707  | 563.619   | -0.980 | 0.212 | -4.630  | 3.7E-06 | 2.1558E-05 | Tprn     |
| ENSMUSG00000023007  | 350.984   | -0.980 | 0.242 | -4.055  | 5.0E-05 | 0.00025069 | Prpf40b  |
| ENSMUSG00000078440  | 756.384   | -0.980 | 0.176 | -5.573  | 2.5E-08 | 1.9149E-07 | Dohh     |
| ENSMUSG00000053226  | 114.916   | -0.981 | 0.378 | -2.593  | 9.5E-03 | 0.02993103 | Dand5    |
| ENSMUSG00000044197  | 2036.357  | -0.981 | 0.208 | -4.719  | 2.4E-06 | 1.4316E-05 | Gpr146   |
| ENSMUSG00000035944  | 208.250   | -0.982 | 0.311 | -3.154  | 1.6E-03 | 0.00613506 | Ttc38    |
| ENSMUSG00000028393  | 1039.101  | -0.982 | 0.149 | -6.581  | 4.7E-11 | 4.5872E-10 | Alad     |
| ENSMUSG00000074211  | 122.702   | -0.982 | 0.337 | -2.919  | 3.5E-03 | 0.01243715 | Sdhaf1   |
| ENSMUSG00000032883  | 175.836   | -0.983 | 0.355 | -2.772  | 5.6E-03 | 0.01878534 | Acs13    |
| ENSMUSG00000000561  | 1003.953  | -0.984 | 0.130 | -7.574  | 3.6E-14 | 4.5215E-13 | Wdr77    |
| ENSMUSG00000032121  | 172.672   | -0.985 | 0.264 | -3.729  | 1.9E-04 | 0.00087129 | Tmem218  |
| ENSMUSG00000028405  | 2373.613  | -0.986 | 0.161 | -6.126  | 9.0E-10 | 7.9744E-09 | Aco1     |
| ENSMUSG00000085156  | 988.156   | -0.986 | 0.186 | -5.303  | 1.1E-07 | 8.0681E-07 | Snhg15   |
| ENSMUSG00000015659  | 145.114   | -0.986 | 0.317 | -3.110  | 1.9E-03 | 0.0070315  | Seracl   |
| ENSMUSG00000024246  | 357.389   | -0.987 | 0.279 | -3.537  | 4.0E-04 | 0.00172642 | Thumpd2  |
| ENSMUSG00000028756  | 3613.068  | -0.987 | 0.142 | -6.971  | 3.1E-12 | 3.4151E-11 | Pink1    |
| ENSMUSG00000036438  | 20067.650 | -0.988 | 0.067 | -14.773 | 2.2E-49 | 1.2011E-47 | Calm2    |
| ENSMUSG00000046876  | 1673.439  | -0.989 | 0.113 | -8.752  | 2.1E-18 | 3.4841E-17 | Atxn1    |
| ENSMUSG00000031562  | 261.819   | -0.991 | 0.234 | -4.225  | 2.4E-05 | 0.00012499 | Dctd     |
| ENSMUSG00000105031  | 1941.206  | -0.991 | 0.201 | -4.932  | 8.1E-07 | 5.1606E-06 | Gm3511   |
| ENSMUSG00000041654  | 1491.926  | -0.991 | 0.143 | -6.945  | 3.8E-12 | 4.0908E-11 | Slc39a11 |
| ENSMUSG00000027589  | 666.893   | -0.991 | 0.214 | -4.624  | 3.8E-06 | 2.2099E-05 | Pemtd2   |
| ENSMUSG00000048497  | 653.206   | -0.992 | 0.171 | -5.812  | 6.2E-09 | 5.0365E-08 | Mmgt2    |
| ENSMUSG00000027087  | 5542.880  | -0.993 | 0.095 | -10.502 | 8.4E-26 | 1.9842E-24 | Itgav    |
| ENSMUSG00000046994  | 571.049   | -0.993 | 0.207 | -4.808  | 1.5E-06 | 9.3939E-06 | Mars2    |
| ENSMUSG00000082165  | 40.742    | -0.995 | 0.393 | -2.533  | 1.1E-02 | 0.03490669 | Gm7091   |
| ENSMUSG00000028221  | 2174.813  | -0.995 | 0.137 | -7.265  | 3.7E-13 | 4.3577E-12 | Pip4p2   |
| ENSMUSG00000035142  | 220.491   | -0.995 | 0.296 | -3.361  | 7.8E-04 | 0.00314154 | Nubpl    |

|                    |           |        |       |         |         |            |               |
|--------------------|-----------|--------|-------|---------|---------|------------|---------------|
| ENSMUSG00000027495 | 730.018   | -0.996 | 0.224 | -4.439  | 9.0E-06 | 5.04E-05   | Fam210b       |
| ENSMUSG00000097944 | 217.547   | -0.997 | 0.367 | -2.720  | 6.5E-03 | 0.02158563 | A130014A01Rik |
| ENSMUSG00000030208 | 10421.595 | -0.997 | 0.160 | -6.240  | 4.4E-10 | 3.9629E-09 | Emp1          |
| ENSMUSG00000003573 | 1842.338  | -0.997 | 0.136 | -7.345  | 2.1E-13 | 2.4632E-12 | Homer3        |
| ENSMUSG00000026566 | 875.535   | -0.998 | 0.169 | -5.919  | 3.2E-09 | 2.7205E-08 | Mpz11         |
| ENSMUSG00000040363 | 2293.683  | -0.998 | 0.170 | -5.888  | 3.9E-09 | 3.2581E-08 | Bcor          |
| ENSMUSG00000028398 | 1960.275  | -0.999 | 0.112 | -8.885  | 6.4E-19 | 1.0881E-17 | Dmac1         |
| ENSMUSG00000090101 | 103.557   | -0.999 | 0.282 | -3.541  | 4.0E-04 | 0.00170115 | Snhg9         |
| ENSMUSG00000027843 | 869.492   | -0.999 | 0.169 | -5.906  | 3.5E-09 | 2.9246E-08 | Ptpn22        |
| ENSMUSG00000026192 | 1744.954  | -1.001 | 0.138 | -7.251  | 4.1E-13 | 4.8315E-12 | Atic          |
| ENSMUSG00000085245 | 86.400    | -1.002 | 0.343 | -2.922  | 3.5E-03 | 0.01232561 | Gm11713       |
| ENSMUSG00000022016 | 505.221   | -1.002 | 0.200 | -5.012  | 5.4E-07 | 3.5067E-06 | Akap11        |
| ENSMUSG00000054115 | 376.170   | -1.003 | 0.242 | -4.145  | 3.4E-05 | 0.00017339 | Skp2          |
| ENSMUSG00000028737 | 331.580   | -1.004 | 0.214 | -4.702  | 2.6E-06 | 1.5425E-05 | Aldh4a1       |
| ENSMUSG00000075704 | 1240.477  | -1.004 | 0.136 | -7.366  | 1.8E-13 | 2.1058E-12 | Txnrd2        |
| ENSMUSG00000052369 | 1683.504  | -1.004 | 0.121 | -8.324  | 8.5E-17 | 1.267E-15  | Tmem106c      |
| ENSMUSG00000027709 | 600.102   | -1.004 | 0.169 | -5.928  | 3.1E-09 | 2.5818E-08 | Mccc1         |
| ENSMUSG00000024921 | 888.985   | -1.004 | 0.193 | -5.207  | 1.9E-07 | 1.3228E-06 | Smarca2       |
| ENSMUSG00000097772 | 157.461   | -1.005 | 0.293 | -3.424  | 6.2E-04 | 0.00254474 | 5430416N02Rik |
| ENSMUSG00000061286 | 2677.881  | -1.005 | 0.130 | -7.704  | 1.3E-14 | 1.6921E-13 | Exosc5        |
| ENSMUSG00000058351 | 1115.793  | -1.005 | 0.163 | -6.184  | 6.3E-10 | 5.6042E-09 | Smim4         |
| ENSMUSG00000029821 | 2064.248  | -1.005 | 0.154 | -6.542  | 6.1E-11 | 5.9369E-10 | Gsdme         |
| ENSMUSG00000023909 | 483.329   | -1.005 | 0.231 | -4.351  | 1.4E-05 | 7.3613E-05 | Paqr4         |
| ENSMUSG00000055053 | 3619.318  | -1.006 | 0.106 | -9.488  | 2.4E-21 | 4.5818E-20 | Nfic          |
| ENSMUSG00000055782 | 684.658   | -1.006 | 0.242 | -4.156  | 3.2E-05 | 0.00016557 | Abcd2         |
| ENSMUSG00000069206 | 267.075   | -1.007 | 0.339 | -2.968  | 3.0E-03 | 0.01077755 | Zfp874a       |
| ENSMUSG00000028407 | 137.936   | -1.008 | 0.225 | -4.480  | 7.5E-06 | 4.2281E-05 | Smim27        |
| ENSMUSG00000062619 | 761.104   | -1.009 | 0.160 | -6.311  | 2.8E-10 | 2.5626E-09 | 2310039H08Rik |
| ENSMUSG00000063849 | 1197.325  | -1.009 | 0.173 | -5.821  | 5.8E-09 | 4.7902E-08 | Ppcdc         |
| ENSMUSG00000014980 | 573.076   | -1.010 | 0.162 | -6.250  | 4.1E-10 | 3.7442E-09 | Tsen15        |
| ENSMUSG00000033209 | 150.736   | -1.010 | 0.364 | -2.775  | 5.5E-03 | 0.01863696 | Ttc28         |
| ENSMUSG00000026154 | 591.623   | -1.011 | 0.152 | -6.649  | 3.0E-11 | 2.9527E-10 | Sdhaf4        |
| ENSMUSG00000039109 | 20787.263 | -1.011 | 0.169 | -5.990  | 2.1E-09 | 1.7979E-08 | F13a1         |
| ENSMUSG00000060036 | 2808.759  | -1.012 | 0.136 | -7.447  | 9.6E-14 | 1.1653E-12 | Rpl3          |
| ENSMUSG00000054693 | 7509.152  | -1.012 | 0.081 | -12.434 | 1.7E-35 | 5.9278E-34 | Adam10        |
| ENSMUSG00000046679 | 535.764   | -1.013 | 0.176 | -5.763  | 8.3E-09 | 6.6564E-08 | C87436        |
| ENSMUSG00000023021 | 4830.521  | -1.013 | 0.078 | -12.999 | 1.2E-38 | 4.8404E-37 | Cers5         |
| ENSMUSG00000029833 | 335.281   | -1.014 | 0.238 | -4.251  | 2.1E-05 | 0.00011215 | Trim24        |
| ENSMUSG00000009418 | 821.359   | -1.015 | 0.172 | -5.890  | 3.9E-09 | 3.2216E-08 | Nav1          |
| ENSMUSG00000097571 | 102.918   | -1.015 | 0.343 | -2.958  | 3.1E-03 | 0.0111309  | Jpx           |
| ENSMUSG00000054426 | 106.444   | -1.015 | 0.281 | -3.616  | 3.0E-04 | 0.00131167 | A930005H10Rik |
| ENSMUSG00000041147 | 141.180   | -1.016 | 0.350 | -2.905  | 3.7E-03 | 0.01293963 | Brca2         |
| ENSMUSG00000034194 | 501.825   | -1.016 | 0.200 | -5.092  | 3.5E-07 | 2.3527E-06 | R3hec1        |
| ENSMUSG00000021102 | 4589.023  | -1.017 | 0.101 | -10.103 | 5.4E-24 | 1.1858E-22 | GlrX5         |
| ENSMUSG00000038178 | 4133.010  | -1.017 | 0.099 | -10.236 | 1.4E-24 | 3.0734E-23 | Slc43a2       |
| ENSMUSG00000003809 | 484.252   | -1.018 | 0.227 | -4.483  | 7.3E-06 | 4.1559E-05 | Gcdh          |
| ENSMUSG00000050592 | 578.712   | -1.018 | 0.245 | -4.162  | 3.1E-05 | 0.00016126 | Fam78a        |
| ENSMUSG00000024151 | 636.508   | -1.018 | 0.206 | -4.937  | 7.9E-07 | 5.0406E-06 | Msh2          |
| ENSMUSG00000050106 | 332.855   | -1.018 | 0.192 | -5.316  | 1.1E-07 | 7.5562E-07 | Tmc8          |
| ENSMUSG00000022307 | 2921.417  | -1.018 | 0.119 | -8.590  | 8.7E-18 | 1.3843E-16 | Oxr1          |
| ENSMUSG00000048232 | 199.631   | -1.018 | 0.297 | -3.427  | 6.1E-04 | 0.00251456 | Fbxo10        |
| ENSMUSG00000015806 | 1525.939  | -1.019 | 0.097 | -10.463 | 1.3E-25 | 2.9761E-24 | Qdpr          |

|                    |           |        |       |         |         |            |               |
|--------------------|-----------|--------|-------|---------|---------|------------|---------------|
| ENSMUSG00000029263 | 364.082   | -1.019 | 0.248 | -4.110  | 4.0E-05 | 0.00020012 | Pigg          |
| ENSMUSG00000003228 | 201.254   | -1.019 | 0.368 | -2.773  | 5.5E-03 | 0.01869787 | Grk5          |
| ENSMUSG00000001962 | 3694.362  | -1.019 | 0.082 | -12.403 | 2.5E-35 | 8.6282E-34 | Fam50a        |
| ENSMUSG00000002504 | 272.235   | -1.019 | 0.330 | -3.086  | 2.0E-03 | 0.00756672 | Slc9a3r2      |
| ENSMUSG00000037098 | 315.340   | -1.020 | 0.215 | -4.741  | 2.1E-06 | 1.2897E-05 | Rab11fip3     |
| ENSMUSG00000115918 | 744.755   | -1.020 | 0.200 | -5.092  | 3.5E-07 | 2.3534E-06 | A930001M01Rik |
| ENSMUSG00000028840 | 50.304    | -1.020 | 0.410 | -2.490  | 1.3E-02 | 0.03879471 | Zfp593        |
| ENSMUSG00000039959 | 3598.743  | -1.020 | 0.213 | -4.779  | 1.8E-06 | 1.075E-05  | Hip1          |
| ENSMUSG00000032526 | 1070.761  | -1.020 | 0.132 | -7.745  | 9.5E-15 | 1.2387E-13 | Ss1812        |
| ENSMUSG00000078635 | 121.057   | -1.020 | 0.273 | -3.731  | 1.9E-04 | 0.00086424 | 1700028N14Rik |
| ENSMUSG00000028673 | 8561.004  | -1.021 | 0.081 | -12.630 | 1.4E-36 | 5.2241E-35 | Fuca1         |
| ENSMUSG00000057147 | 792.803   | -1.021 | 0.178 | -5.730  | 1.0E-08 | 7.998E-08  | Dph6          |
| ENSMUSG00000006360 | 8448.921  | -1.021 | 0.155 | -6.572  | 5.0E-11 | 4.8831E-10 | Crip1         |
| ENSMUSG00000045092 | 7116.499  | -1.022 | 0.111 | -9.241  | 2.4E-20 | 4.4922E-19 | S1pr1         |
| ENSMUSG00000030592 | 80.181    | -1.022 | 0.373 | -2.743  | 6.1E-03 | 0.02030471 | Ryr1          |
| ENSMUSG00000116138 | 596.751   | -1.023 | 0.261 | -3.923  | 8.8E-05 | 0.00041938 | C030006K11Rik |
| ENSMUSG00000036188 | 785.410   | -1.025 | 0.175 | -5.847  | 5.0E-09 | 4.12E-08   | Ankmy2        |
| ENSMUSG00000022698 | 6090.674  | -1.026 | 0.072 | -14.163 | 1.5E-45 | 7.4898E-44 | Naa50         |
| ENSMUSG00000118537 | 134.762   | -1.026 | 0.383 | -2.680  | 7.4E-03 | 0.02391662 | Shld3         |
| ENSMUSG00000057497 | 2529.474  | -1.026 | 0.106 | -9.714  | 2.6E-22 | 5.3262E-21 | Fam136a       |
| ENSMUSG00000024312 | 2026.499  | -1.026 | 0.154 | -6.678  | 2.4E-11 | 2.4377E-10 | Wdr46         |
| ENSMUSG00000001247 | 121.098   | -1.026 | 0.331 | -3.104  | 1.9E-03 | 0.00717256 | Lsr           |
| ENSMUSG00000059975 | 206.819   | -1.027 | 0.337 | -3.052  | 2.3E-03 | 0.00839181 | Zfp74         |
| ENSMUSG00000045216 | 180.275   | -1.028 | 0.274 | -3.755  | 1.7E-04 | 0.00079316 | Hs6st1        |
| ENSMUSG00000032245 | 1535.592  | -1.029 | 0.130 | -7.889  | 3.0E-15 | 4.0809E-14 | Cln6          |
| ENSMUSG00000110444 | 251.515   | -1.030 | 0.248 | -4.155  | 3.3E-05 | 0.00016625 | Gm10033       |
| ENSMUSG00000117505 | 71.089    | -1.031 | 0.381 | -2.710  | 6.7E-03 | 0.02219918 | Gm9993        |
| ENSMUSG00000054169 | 106.315   | -1.032 | 0.400 | -2.578  | 9.9E-03 | 0.03104848 | Ceacam10      |
| ENSMUSG00000022940 | 423.812   | -1.032 | 0.166 | -6.232  | 4.6E-10 | 4.173E-09  | Pigp          |
| ENSMUSG00000018199 | 729.371   | -1.032 | 0.184 | -5.606  | 2.1E-08 | 1.6015E-07 | Ro60          |
| ENSMUSG00000021592 | 525.495   | -1.033 | 0.161 | -6.412  | 1.4E-10 | 1.3652E-09 | Arsk          |
| ENSMUSG00000028261 | 1214.124  | -1.033 | 0.145 | -7.150  | 8.7E-13 | 9.803E-12  | Ndufaf4       |
| ENSMUSG00000040269 | 1634.201  | -1.034 | 0.128 | -8.106  | 5.2E-16 | 7.416E-15  | Mrps28        |
| ENSMUSG00000022701 | 238.330   | -1.034 | 0.278 | -3.725  | 2.0E-04 | 0.00088521 | Ccdc191       |
| ENSMUSG00000043993 | 105.989   | -1.034 | 0.421 | -2.454  | 1.4E-02 | 0.04235143 | 2900052L18Rik |
| ENSMUSG00000064360 | 70.269    | -1.034 | 0.384 | -2.695  | 7.0E-03 | 0.02303146 | mt-Nd3        |
| ENSMUSG00000018677 | 12274.504 | -1.034 | 0.061 | -16.875 | 6.9E-64 | 5.7119E-62 | Slc25a39      |
| ENSMUSG00000038623 | 4715.496  | -1.036 | 0.115 | -8.981  | 2.7E-19 | 4.6798E-18 | Tm6sf1        |
| ENSMUSG00000038712 | 5303.559  | -1.037 | 0.086 | -12.024 | 2.7E-33 | 8.5292E-32 | Mindy1        |
| ENSMUSG00000086742 | 107.629   | -1.038 | 0.329 | -3.152  | 1.6E-03 | 0.00617488 | Gm16201       |
| ENSMUSG00000030780 | 722.981   | -1.038 | 0.171 | -6.057  | 1.4E-09 | 1.203E-08  | Rusf1         |
| ENSMUSG00000040785 | 936.630   | -1.038 | 0.166 | -6.261  | 3.8E-10 | 3.51E-09   | Ttc3          |
| ENSMUSG00000022571 | 1027.649  | -1.039 | 0.145 | -7.173  | 7.4E-13 | 8.393E-12  | Pycri         |
| ENSMUSG00000062075 | 1027.637  | -1.039 | 0.145 | -7.185  | 6.7E-13 | 7.6966E-12 | Lmnb2         |
| ENSMUSG00000031807 | 7031.600  | -1.040 | 0.112 | -9.263  | 2.0E-20 | 3.6799E-19 | Pgls          |
| ENSMUSG00000028331 | 350.367   | -1.041 | 0.223 | -4.656  | 3.2E-06 | 1.9139E-05 | Trmo          |
| ENSMUSG00000022131 | 1159.115  | -1.041 | 0.157 | -6.649  | 2.9E-11 | 2.9495E-10 | Gpr180        |
| ENSMUSG00000027387 | 203.868   | -1.042 | 0.299 | -3.485  | 4.9E-04 | 0.00206848 | Zc3h8         |
| ENSMUSG00000099481 | 57.002    | -1.042 | 0.435 | -2.394  | 1.7E-02 | 0.04899196 | Xndc1         |
| ENSMUSG00000027303 | 6336.055  | -1.042 | 0.096 | -10.836 | 2.3E-27 | 5.8729E-26 | Ptptra        |
| ENSMUSG00000028689 | 382.914   | -1.043 | 0.233 | -4.467  | 7.9E-06 | 4.4704E-05 | Ccdc163       |
| ENSMUSG00000054051 | 290.506   | -1.043 | 0.240 | -4.338  | 1.4E-05 | 7.7613E-05 | Erc6          |

|                    |          |        |       |         |         |            |               |
|--------------------|----------|--------|-------|---------|---------|------------|---------------|
| ENSMUSG00000032349 | 2707.989 | -1.043 | 0.114 | -9.153  | 5.5E-20 | 9.9849E-19 | Elov15        |
| ENSMUSG00000084349 | 341.150  | -1.043 | 0.145 | -7.188  | 6.6E-13 | 7.5598E-12 | Rpl3-ps1      |
| ENSMUSG00000067430 | 103.939  | -1.044 | 0.404 | -2.586  | 9.7E-03 | 0.03044639 | Zfp763        |
| ENSMUSG00000036078 | 3223.826 | -1.045 | 0.099 | -10.564 | 4.4E-26 | 1.0456E-24 | Sigmar1       |
| ENSMUSG00000096768 | 371.308  | -1.045 | 0.328 | -3.186  | 1.4E-03 | 0.0055537  | Gm47283       |
| ENSMUSG00000003948 | 896.028  | -1.046 | 0.180 | -5.805  | 6.4E-09 | 5.2261E-08 | Mmd           |
| ENSMUSG00000030880 | 1477.471 | -1.046 | 0.158 | -6.621  | 3.6E-11 | 3.5532E-10 | Polr3e        |
| ENSMUSG00000034880 | 2586.481 | -1.047 | 0.141 | -7.419  | 1.2E-13 | 1.4309E-12 | Mrpl34        |
| ENSMUSG00000016933 | 363.663  | -1.047 | 0.266 | -3.936  | 8.3E-05 | 0.00039847 | Plcg1         |
| ENSMUSG00000047547 | 3106.506 | -1.048 | 0.124 | -8.476  | 2.3E-17 | 3.5933E-16 | Cltb          |
| ENSMUSG00000036622 | 9125.635 | -1.049 | 0.114 | -9.195  | 3.8E-20 | 6.857E-19  | Atp13a2       |
| ENSMUSG00000047412 | 675.802  | -1.049 | 0.214 | -4.891  | 1.0E-06 | 6.3321E-06 | Zbtb44        |
| ENSMUSG00000029559 | 1354.807 | -1.050 | 0.141 | -7.423  | 1.1E-13 | 1.3907E-12 | 2210016L21Rik |
| ENSMUSG00000052949 | 225.477  | -1.051 | 0.403 | -2.610  | 9.1E-03 | 0.02866475 | Rnfl57        |
| ENSMUSG00000035085 | 40.547   | -1.052 | 0.400 | -2.631  | 8.5E-03 | 0.02717825 | 1700020L24Rik |
| ENSMUSG00000106925 | 31.254   | -1.052 | 0.408 | -2.578  | 9.9E-03 | 0.03105143 | Gm20072       |
| ENSMUSG00000028013 | 1094.759 | -1.053 | 0.131 | -8.041  | 8.9E-16 | 1.2457E-14 | Ppa2          |
| ENSMUSG00000022679 | 88.137   | -1.053 | 0.431 | -2.444  | 1.5E-02 | 0.0434757  | Mpv171        |
| ENSMUSG00000027165 | 368.802  | -1.053 | 0.223 | -4.712  | 2.5E-06 | 1.4764E-05 | Iftap         |
| ENSMUSG00000043004 | 2454.060 | -1.054 | 0.134 | -7.857  | 3.9E-15 | 5.2629E-14 | Gng2          |
| ENSMUSG00000058402 | 162.673  | -1.054 | 0.403 | -2.617  | 8.9E-03 | 0.02819477 | Zfp420        |
| ENSMUSG00000107283 | 1363.544 | -1.055 | 0.106 | -9.910  | 3.8E-23 | 8.0165E-22 | Mpv17         |
| ENSMUSG00000039242 | 744.740  | -1.056 | 0.210 | -5.031  | 4.9E-07 | 3.1843E-06 | B3galnt2      |
| ENSMUSG00000019132 | 8639.377 | -1.058 | 0.128 | -8.258  | 1.5E-16 | 2.1795E-15 | BC005537      |
| ENSMUSG00000028385 | 1823.974 | -1.059 | 0.146 | -7.261  | 3.8E-13 | 4.4845E-12 | Snx30         |
| ENSMUSG00000087590 | 136.456  | -1.060 | 0.284 | -3.730  | 1.9E-04 | 0.00086751 | Epb4114aos    |
| ENSMUSG00000019960 | 5555.861 | -1.060 | 0.104 | -10.204 | 1.9E-24 | 4.2697E-23 | Dusp6         |
| ENSMUSG00000036327 | 571.046  | -1.061 | 0.237 | -4.483  | 7.4E-06 | 4.1685E-05 | Qsox2         |
| ENSMUSG00000062931 | 151.432  | -1.061 | 0.321 | -3.310  | 9.3E-04 | 0.00372511 | Zfp938        |
| ENSMUSG00000036504 | 63.707   | -1.062 | 0.305 | -3.482  | 5.0E-04 | 0.00208697 | Phpt1         |
| ENSMUSG00000064254 | 4368.024 | -1.062 | 0.106 | -10.011 | 1.4E-23 | 2.9514E-22 | Ethe1         |
| ENSMUSG00000038208 | 257.654  | -1.063 | 0.347 | -3.063  | 2.2E-03 | 0.00814178 | Pgap3         |
| ENSMUSG00000015943 | 1004.901 | -1.064 | 0.176 | -6.036  | 1.6E-09 | 1.3676E-08 | Bola1         |
| ENSMUSG00000004356 | 673.183  | -1.064 | 0.213 | -4.994  | 5.9E-07 | 3.831E-06  | Utp20         |
| ENSMUSG00000074218 | 101.675  | -1.064 | 0.276 | -3.863  | 1.1E-04 | 0.00052758 | Cox7a1        |
| ENSMUSG00000100017 | 180.882  | -1.067 | 0.311 | -3.430  | 6.0E-04 | 0.00249081 | 2410022M11Rik |
| ENSMUSG00000042439 | 151.800  | -1.067 | 0.330 | -3.231  | 1.2E-03 | 0.00481515 | Zfp532        |
| ENSMUSG00000008575 | 289.971  | -1.067 | 0.290 | -3.686  | 2.3E-04 | 0.00101714 | Nfib          |
| ENSMUSG00000054519 | 166.127  | -1.067 | 0.311 | -3.432  | 6.0E-04 | 0.00247771 | Zfp867        |
| ENSMUSG00000025742 | 703.631  | -1.068 | 0.211 | -5.070  | 4.0E-07 | 2.6281E-06 | Prps2         |
| ENSMUSG00000019874 | 765.803  | -1.068 | 0.281 | -3.804  | 1.4E-04 | 0.00066049 | Fabp7         |
| ENSMUSG00000049624 | 1564.562 | -1.069 | 0.121 | -8.809  | 1.3E-18 | 2.119E-17  | Slc17a5       |
| ENSMUSG00000051483 | 1054.952 | -1.070 | 0.160 | -6.702  | 2.1E-11 | 2.0778E-10 | Cbr1          |
| ENSMUSG00000024413 | 2973.260 | -1.070 | 0.122 | -8.790  | 1.5E-18 | 2.5021E-17 | Npcl          |
| ENSMUSG00000085037 | 266.641  | -1.071 | 0.254 | -4.224  | 2.4E-05 | 0.00012519 | 4933421O10Rik |
| ENSMUSG00000022708 | 1403.855 | -1.071 | 0.127 | -8.451  | 2.9E-17 | 4.4463E-16 | Zbtb20        |
| ENSMUSG00000022533 | 793.649  | -1.071 | 0.216 | -4.951  | 7.4E-07 | 4.7059E-06 | Atp13a3       |
| ENSMUSG00000031333 | 531.758  | -1.072 | 0.218 | -4.910  | 9.1E-07 | 5.7553E-06 | Abcb7         |
| ENSMUSG00000015289 | 828.697  | -1.073 | 0.145 | -7.389  | 1.5E-13 | 1.7903E-12 | Lage3         |
| ENSMUSG00000026659 | 286.167  | -1.073 | 0.212 | -5.062  | 4.1E-07 | 2.7266E-06 | Dusp12        |
| ENSMUSG00000027185 | 820.468  | -1.073 | 0.208 | -5.163  | 2.4E-07 | 1.6571E-06 | Nat10         |
| ENSMUSG00000034848 | 206.063  | -1.073 | 0.349 | -3.077  | 2.1E-03 | 0.00777742 | Ttc21b        |

|                    |            |        |       |         |         |            |               |
|--------------------|------------|--------|-------|---------|---------|------------|---------------|
| ENSMUSG00000035439 | 3876.105   | -1.074 | 0.113 | -9.519  | 1.7E-21 | 3.4232E-20 | Haus8         |
| ENSMUSG00000030465 | 187.002    | -1.075 | 0.341 | -3.158  | 1.6E-03 | 0.00607073 | Psd3          |
| ENSMUSG00000022856 | 560.013    | -1.076 | 0.204 | -5.284  | 1.3E-07 | 8.9102E-07 | Tmem41a       |
| ENSMUSG00000038844 | 555.533    | -1.077 | 0.246 | -4.379  | 1.2E-05 | 6.5333E-05 | Kif16b        |
| ENSMUSG00000021189 | 1238.271   | -1.077 | 0.188 | -5.727  | 1.0E-08 | 8.1463E-08 | Atxn3         |
| ENSMUSG00000107002 | 5046.920   | -1.077 | 0.111 | -9.729  | 2.3E-22 | 4.6143E-21 | 0610012G03Rik |
| ENSMUSG00000024423 | 2473.429   | -1.077 | 0.149 | -7.208  | 5.7E-13 | 6.5255E-12 | Impact        |
| ENSMUSG00000026853 | 2341.333   | -1.077 | 0.141 | -7.651  | 2.0E-14 | 2.5361E-13 | Crat          |
| ENSMUSG00000021240 | 569.838    | -1.078 | 0.269 | -4.007  | 6.2E-05 | 0.00030324 | Abcd4         |
| ENSMUSG00000035967 | 433.076    | -1.078 | 0.227 | -4.751  | 2.0E-06 | 1.2262E-05 | Ints61        |
| ENSMUSG00000026944 | 528.603    | -1.079 | 0.232 | -4.649  | 3.3E-06 | 1.9709E-05 | Abca2         |
| ENSMUSG00000099647 | 49.563     | -1.079 | 0.385 | -2.805  | 5.0E-03 | 0.01717427 | Gm5776        |
| ENSMUSG00000001763 | 385.570    | -1.080 | 0.243 | -4.436  | 9.2E-06 | 5.1035E-05 | Tspan33       |
| ENSMUSG00000056458 | 74.680     | -1.080 | 0.392 | -2.756  | 5.9E-03 | 0.01958447 | Mok           |
| ENSMUSG00000046572 | 175.556    | -1.080 | 0.318 | -3.394  | 6.9E-04 | 0.00281365 | Zfp518b       |
| ENSMUSG00000038371 | 1725.959   | -1.080 | 0.153 | -7.052  | 1.8E-12 | 1.9549E-11 | Sbf2          |
| ENSMUSG00000034563 | 112.495    | -1.080 | 0.319 | -3.389  | 7.0E-04 | 0.00286401 | Ccpg1         |
| ENSMUSG00000034738 | 380.281    | -1.081 | 0.246 | -4.390  | 1.1E-05 | 6.2257E-05 | Nostrin       |
| ENSMUSG00000033685 | 43102.053  | -1.081 | 0.095 | -11.368 | 6.0E-30 | 1.7057E-28 | Ucp2          |
| ENSMUSG00000037325 | 288.825    | -1.081 | 0.349 | -3.098  | 1.9E-03 | 0.00730002 | Bbs7          |
| ENSMUSG00000048458 | 117.879    | -1.082 | 0.339 | -3.194  | 1.4E-03 | 0.00540865 | Inka2         |
| ENSMUSG00000051615 | 2689.772   | -1.082 | 0.194 | -5.579  | 2.4E-08 | 1.8578E-07 | Rap2a         |
| ENSMUSG00000044469 | 173.012    | -1.082 | 0.420 | -2.576  | 1.0E-02 | 0.03118321 | Tnfaip811     |
| ENSMUSG00000050335 | 306739.093 | -1.083 | 0.101 | -10.764 | 5.1E-27 | 1.2663E-25 | Lgals3        |
| ENSMUSG00000031834 | 1884.246   | -1.083 | 0.185 | -5.865  | 4.5E-09 | 3.7333E-08 | Pik3r2        |
| ENSMUSG00000045100 | 188.307    | -1.083 | 0.376 | -2.883  | 3.9E-03 | 0.01377169 | Slc25a26      |
| ENSMUSG00000023022 | 2557.260   | -1.084 | 0.121 | -8.928  | 4.3E-19 | 7.4805E-18 | Lima1         |
| ENSMUSG00000031482 | 430.678    | -1.084 | 0.228 | -4.759  | 1.9E-06 | 1.1809E-05 | Slc25a15      |
| ENSMUSG00000036555 | 396.741    | -1.084 | 0.251 | -4.328  | 1.5E-05 | 8.0961E-05 | Iqce          |
| ENSMUSG00000097119 | 120.181    | -1.085 | 0.358 | -3.027  | 2.5E-03 | 0.00905829 | B230354K17Rik |
| ENSMUSG00000049950 | 476.159    | -1.086 | 0.214 | -5.066  | 4.1E-07 | 2.6733E-06 | Rpp38         |
| ENSMUSG00000061313 | 1904.065   | -1.086 | 0.103 | -10.565 | 4.3E-26 | 1.0368E-24 | Ddhd2         |
| ENSMUSG00000050552 | 4797.685   | -1.086 | 0.128 | -8.462  | 2.6E-17 | 4.0513E-16 | Lamtor4       |
| ENSMUSG00000021508 | 8117.980   | -1.088 | 0.153 | -7.088  | 1.4E-12 | 1.5235E-11 | Cxcl14        |
| ENSMUSG00000024975 | 1384.875   | -1.088 | 0.149 | -7.290  | 3.1E-13 | 3.6623E-12 | Pded4         |
| ENSMUSG00000025137 | 2416.418   | -1.089 | 0.138 | -7.890  | 3.0E-15 | 4.0587E-14 | Pcyt2         |
| ENSMUSG00000062908 | 2572.699   | -1.090 | 0.103 | -10.535 | 5.9E-26 | 1.4067E-24 | Acadm         |
| ENSMUSG00000042644 | 161.445    | -1.090 | 0.371 | -2.937  | 3.3E-03 | 0.01182584 | Itpr3         |
| ENSMUSG00000037416 | 930.782    | -1.090 | 0.146 | -7.484  | 7.2E-14 | 8.841E-13  | Dmxl1         |
| ENSMUSG00000075054 | 235.577    | -1.091 | 0.254 | -4.288  | 1.8E-05 | 9.611E-05  | Yae1d1        |
| ENSMUSG00000062078 | 4829.923   | -1.092 | 0.101 | -10.844 | 2.1E-27 | 5.3632E-26 | Qk            |
| ENSMUSG00000009894 | 1289.633   | -1.092 | 0.149 | -7.350  | 2.0E-13 | 2.3734E-12 | Snap47        |
| ENSMUSG00000085396 | 216.800    | -1.092 | 0.276 | -3.964  | 7.4E-05 | 0.0003571  | Firre         |
| ENSMUSG00000029816 | 205470.016 | -1.093 | 0.100 | -10.946 | 7.0E-28 | 1.7992E-26 | Gpnmb         |
| ENSMUSG00000031827 | 19089.883  | -1.093 | 0.070 | -15.685 | 1.9E-55 | 1.2513E-53 | Cot11         |
| ENSMUSG00000029594 | 342.672    | -1.094 | 0.276 | -3.963  | 7.4E-05 | 0.00035902 | Rbm19         |
| ENSMUSG00000097583 | 115.912    | -1.094 | 0.435 | -2.512  | 1.2E-02 | 0.03674045 | 6430590A07Rik |
| ENSMUSG00000031295 | 925.580    | -1.095 | 0.195 | -5.628  | 1.8E-08 | 1.415E-07  | Phka2         |
| ENSMUSG00000040913 | 137.206    | -1.095 | 0.282 | -3.878  | 1.1E-04 | 0.00049724 | Fbxw4         |
| ENSMUSG00000036155 | 1595.099   | -1.095 | 0.135 | -8.107  | 5.2E-16 | 7.3794E-15 | Mgat5         |
| ENSMUSG00000025937 | 1652.309   | -1.096 | 0.122 | -9.004  | 2.2E-19 | 3.8152E-18 | Lactb2        |
| ENSMUSG00000028430 | 1285.404   | -1.096 | 0.167 | -6.558  | 5.5E-11 | 5.3436E-10 | Nol6          |

|                    |           |        |       |         |         |            |               |
|--------------------|-----------|--------|-------|---------|---------|------------|---------------|
| ENSMUSG00000071724 | 182.935   | -1.097 | 0.332 | -3.302  | 9.6E-04 | 0.00382073 | Smpd5         |
| ENSMUSG00000021311 | 679.724   | -1.097 | 0.178 | -6.162  | 7.2E-10 | 6.4217E-09 | Mtr           |
| ENSMUSG00000024799 | 349.366   | -1.098 | 0.274 | -4.010  | 6.1E-05 | 0.00029919 | Tm7sf2        |
| ENSMUSG00000021238 | 360.190   | -1.098 | 0.277 | -3.966  | 7.3E-05 | 0.00035509 | Aldh6a1       |
| ENSMUSG00000056211 | 2785.530  | -1.098 | 0.116 | -9.472  | 2.7E-21 | 5.2955E-20 | R3hdm1        |
| ENSMUSG00000066613 | 223.774   | -1.099 | 0.256 | -4.298  | 1.7E-05 | 9.1939E-05 | Zfp932        |
| ENSMUSG00000037805 | 3162.237  | -1.099 | 0.122 | -8.976  | 2.8E-19 | 4.8998E-18 | Rpl10a        |
| ENSMUSG00000027423 | 10538.871 | -1.099 | 0.109 | -10.087 | 6.3E-24 | 1.3873E-22 | Snx5          |
| ENSMUSG00000028127 | 1485.059  | -1.100 | 0.121 | -9.092  | 9.8E-20 | 1.7394E-18 | Abcd3         |
| ENSMUSG00000034993 | 15859.677 | -1.100 | 0.092 | -11.976 | 4.7E-33 | 1.5164E-31 | Vat1          |
| ENSMUSG00000054434 | 375.678   | -1.101 | 0.260 | -4.239  | 2.2E-05 | 0.00011765 | Tmem120b      |
| ENSMUSG00000001729 | 2808.061  | -1.101 | 0.244 | -4.507  | 6.6E-06 | 3.7376E-05 | Akt1          |
| ENSMUSG00000032300 | 2148.155  | -1.101 | 0.174 | -6.337  | 2.3E-10 | 2.188E-09  | 1700017B05Rik |
| ENSMUSG00000108152 | 149.748   | -1.102 | 0.375 | -2.935  | 3.3E-03 | 0.01187801 | Gm44152       |
| ENSMUSG00000010047 | 1874.806  | -1.102 | 0.138 | -7.975  | 1.5E-15 | 2.0836E-14 | Hyal2         |
| ENSMUSG00000042462 | 1139.507  | -1.103 | 0.156 | -7.081  | 1.4E-12 | 1.5985E-11 | Dctpp1        |
| ENSMUSG00000029276 | 193.294   | -1.103 | 0.280 | -3.946  | 7.9E-05 | 0.00038318 | Glmn          |
| ENSMUSG00000048264 | 349.504   | -1.106 | 0.271 | -4.078  | 4.5E-05 | 0.00022813 | Dip2c         |
| ENSMUSG00000027656 | 1816.590  | -1.106 | 0.215 | -5.135  | 2.8E-07 | 1.9006E-06 | Ccn5          |
| ENSMUSG00000044149 | 64.400    | -1.107 | 0.409 | -2.703  | 6.9E-03 | 0.02256838 | Nkrf          |
| ENSMUSG00000019883 | 48.032    | -1.107 | 0.423 | -2.616  | 8.9E-03 | 0.02824941 | Echdc1        |
| ENSMUSG00000018537 | 106.732   | -1.109 | 0.285 | -3.885  | 1.0E-04 | 0.00048487 | Pcgf2         |
| ENSMUSG00000026603 | 773.012   | -1.109 | 0.172 | -6.449  | 1.1E-10 | 1.076E-09  | Smyd2         |
| ENSMUSG00000030263 | 1105.245  | -1.110 | 0.186 | -5.976  | 2.3E-09 | 1.9407E-08 | Lrmp          |
| ENSMUSG00000026245 | 3718.029  | -1.110 | 0.101 | -11.041 | 2.4E-28 | 6.376E-27  | Farsb         |
| ENSMUSG00000028518 | 128.681   | -1.110 | 0.348 | -3.193  | 1.4E-03 | 0.00543279 | Prkaa2        |
| ENSMUSG00000022305 | 2015.447  | -1.110 | 0.208 | -5.339  | 9.3E-08 | 6.6846E-07 | Lrp12         |
| ENSMUSG00000021180 | 317.401   | -1.111 | 0.184 | -6.043  | 1.5E-09 | 1.3136E-08 | Rps6ka5       |
| ENSMUSG00000075595 | 955.728   | -1.111 | 0.171 | -6.512  | 7.4E-11 | 7.1867E-10 | Zfp652        |
| ENSMUSG00000009569 | 1603.260  | -1.111 | 0.134 | -8.285  | 1.2E-16 | 1.7519E-15 | Mrtfb         |
| ENSMUSG00000101609 | 758.287   | -1.111 | 0.224 | -4.962  | 7.0E-07 | 4.4565E-06 | Kcnq1ot1      |
| ENSMUSG00000024299 | 796.597   | -1.113 | 0.198 | -5.610  | 2.0E-08 | 1.5667E-07 | Adamts10      |
| ENSMUSG00000048581 | 249.531   | -1.113 | 0.344 | -3.233  | 1.2E-03 | 0.00478123 | E130311K13Rik |
| ENSMUSG00000022270 | 1679.311  | -1.113 | 0.160 | -6.972  | 3.1E-12 | 3.3872E-11 | Retreg1       |
| ENSMUSG00000017607 | 161.045   | -1.113 | 0.427 | -2.607  | 9.1E-03 | 0.02890146 | Tns4          |
| ENSMUSG00000027357 | 535.291   | -1.114 | 0.392 | -2.844  | 4.5E-03 | 0.01541229 | Crls1         |
| ENSMUSG00000040280 | 223.072   | -1.114 | 0.305 | -3.651  | 2.6E-04 | 0.00115886 | Ndufa412      |
| ENSMUSG00000073700 | 1408.102  | -1.114 | 0.153 | -7.269  | 3.6E-13 | 4.2303E-12 | Klh121        |
| ENSMUSG00000021792 | 544.318   | -1.114 | 0.148 | -7.510  | 5.9E-14 | 7.3214E-13 | Prx12a        |
| ENSMUSG00000019841 | 409.025   | -1.115 | 0.191 | -5.836  | 5.3E-09 | 4.3882E-08 | Rev3l         |
| ENSMUSG00000028549 | 120.099   | -1.115 | 0.378 | -2.948  | 3.2E-03 | 0.01144692 | Itgb3bp       |
| ENSMUSG00000071037 | 217.043   | -1.116 | 0.251 | -4.438  | 9.1E-06 | 5.0559E-05 | Camkmt        |
| ENSMUSG00000002274 | 470.957   | -1.117 | 0.188 | -5.931  | 3.0E-09 | 2.5443E-08 | Metrn         |
| ENSMUSG00000020888 | 1375.782  | -1.117 | 0.170 | -6.575  | 4.9E-11 | 4.7909E-10 | Dvl2          |
| ENSMUSG00000035473 | 415.880   | -1.118 | 0.204 | -5.468  | 4.5E-08 | 3.3776E-07 | Galm          |
| ENSMUSG00000021127 | 9359.830  | -1.119 | 0.122 | -9.187  | 4.1E-20 | 7.3756E-19 | Zfp3611       |
| ENSMUSG00000056952 | 247.518   | -1.120 | 0.336 | -3.336  | 8.5E-04 | 0.00341082 | Tatdn2        |
| ENSMUSG00000021245 | 202.274   | -1.121 | 0.361 | -3.106  | 1.9E-03 | 0.00713023 | Mlh3          |
| ENSMUSG00000029290 | 1119.286  | -1.122 | 0.128 | -8.740  | 2.3E-18 | 3.8465E-17 | Zfp326        |
| ENSMUSG00000039253 | 331.467   | -1.123 | 0.225 | -4.986  | 6.2E-07 | 3.9785E-06 | Fn3krp        |
| ENSMUSG00000113722 | 128.090   | -1.123 | 0.312 | -3.603  | 3.1E-04 | 0.00137367 | Snhg10        |
| ENSMUSG00000047767 | 840.426   | -1.123 | 0.151 | -7.458  | 8.8E-14 | 1.0761E-12 | Atg16l2       |

|                    |            |        |       |         |         |            |               |
|--------------------|------------|--------|-------|---------|---------|------------|---------------|
| ENSMUSG00000066621 | 2008.971   | -1.123 | 0.147 | -7.626  | 2.4E-14 | 3.064E-13  | Tecpr1        |
| ENSMUSG00000026358 | 4896.795   | -1.125 | 0.210 | -5.365  | 8.1E-08 | 5.859E-07  | Rgs1          |
| ENSMUSG00000027243 | 336.021    | -1.125 | 0.351 | -3.205  | 1.4E-03 | 0.00522188 | Harbi1        |
| ENSMUSG00000038065 | 113.486    | -1.125 | 0.398 | -2.826  | 4.7E-03 | 0.01619178 | Mturn         |
| ENSMUSG00000051373 | 225.858    | -1.125 | 0.371 | -3.034  | 2.4E-03 | 0.00884913 | Plpp7         |
| ENSMUSG00000010607 | 958.207    | -1.126 | 0.127 | -8.878  | 6.8E-19 | 1.1606E-17 | Pigyl         |
| ENSMUSG00000054619 | 230.519    | -1.126 | 0.354 | -3.177  | 1.5E-03 | 0.00571951 | Mett17a1      |
| ENSMUSG00000021094 | 2959.547   | -1.127 | 0.085 | -13.238 | 5.3E-40 | 2.163E-38  | Dhrs7         |
| ENSMUSG00000063320 | 334.038    | -1.127 | 0.236 | -4.779  | 1.8E-06 | 1.0743E-05 | 1190007I07Rik |
| ENSMUSG00000066057 | 66.977     | -1.128 | 0.466 | -2.418  | 1.6E-02 | 0.04622595 | Gm1976        |
| ENSMUSG00000103851 | 64.784     | -1.128 | 0.451 | -2.502  | 1.2E-02 | 0.03770362 | Gm37606       |
| ENSMUSG00000078762 | 44.567     | -1.128 | 0.463 | -2.437  | 1.5E-02 | 0.04421012 | Haus5         |
| ENSMUSG00000013236 | 1785.970   | -1.130 | 0.139 | -8.123  | 4.5E-16 | 6.4551E-15 | Ptpsr         |
| ENSMUSG00000037940 | 366.874    | -1.130 | 0.207 | -5.456  | 4.9E-08 | 3.6151E-07 | Inpp4b        |
| ENSMUSG00000041734 | 125.274    | -1.130 | 0.379 | -2.980  | 2.9E-03 | 0.01041511 | Kirrel        |
| ENSMUSG00000011382 | 610.846    | -1.131 | 0.161 | -7.017  | 2.3E-12 | 2.4815E-11 | Dhdh          |
| ENSMUSG00000033713 | 3101.926   | -1.131 | 0.104 | -10.874 | 1.5E-27 | 3.8882E-26 | Foxn3         |
| ENSMUSG00000102418 | 238.687    | -1.131 | 0.221 | -5.120  | 3.1E-07 | 2.0536E-06 | Sh2d1b1       |
| ENSMUSG00000043885 | 967.223    | -1.132 | 0.172 | -6.598  | 4.2E-11 | 4.1245E-10 | Slc36a4       |
| ENSMUSG00000036898 | 409.759    | -1.132 | 0.331 | -3.416  | 6.4E-04 | 0.00261144 | Zfp157        |
| ENSMUSG00000037035 | 48.152     | -1.133 | 0.473 | -2.394  | 1.7E-02 | 0.04895288 | Inhbb         |
| ENSMUSG00000074280 | 282.193    | -1.134 | 0.213 | -5.329  | 9.9E-08 | 7.0501E-07 | Gm6166        |
| ENSMUSG00000029674 | 380.201    | -1.134 | 0.272 | -4.177  | 3.0E-05 | 0.00015183 | Limk1         |
| ENSMUSG00000075528 | 40.402     | -1.136 | 0.469 | -2.421  | 1.5E-02 | 0.0459423  | Aarsd1        |
| ENSMUSG00000023923 | 723.512    | -1.136 | 0.156 | -7.296  | 3.0E-13 | 3.5112E-12 | Tbc1d5        |
| ENSMUSG00000031133 | 1464.374   | -1.137 | 0.187 | -6.092  | 1.1E-09 | 9.7667E-09 | Arhgef6       |
| ENSMUSG00000062906 | 512.125    | -1.137 | 0.289 | -3.936  | 8.3E-05 | 0.00039857 | Hdac10        |
| ENSMUSG00000074865 | 80.945     | -1.138 | 0.447 | -2.544  | 1.1E-02 | 0.03389551 | Zfp934        |
| ENSMUSG00000032422 | 644.012    | -1.138 | 0.184 | -6.202  | 5.6E-10 | 5.0179E-09 | Snx14         |
| ENSMUSG00000037221 | 1998.900   | -1.139 | 0.103 | -11.091 | 1.4E-28 | 3.673E-27  | Mospd3        |
| ENSMUSG00000015342 | 94.953     | -1.139 | 0.368 | -3.094  | 2.0E-03 | 0.00738443 | Xk            |
| ENSMUSG00000029463 | 95.272     | -1.140 | 0.336 | -3.396  | 6.9E-04 | 0.00279786 | Fam216a       |
| ENSMUSG00000025086 | 272.289    | -1.140 | 0.218 | -5.223  | 1.8E-07 | 1.2222E-06 | Trub1         |
| ENSMUSG00000031284 | 83.551     | -1.140 | 0.428 | -2.664  | 7.7E-03 | 0.02495475 | Pak3          |
| ENSMUSG00000042046 | 628.759    | -1.140 | 0.212 | -5.373  | 7.8E-08 | 5.617E-07  | Dstyk         |
| ENSMUSG00000029373 | 166500.371 | -1.141 | 0.138 | -8.249  | 1.6E-16 | 2.3506E-15 | Pf4           |
| ENSMUSG00000026200 | 300.417    | -1.142 | 0.301 | -3.795  | 1.5E-04 | 0.00068269 | Glb11         |
| ENSMUSG00000023284 | 118.309    | -1.142 | 0.369 | -3.091  | 2.0E-03 | 0.00745667 | Zfp605        |
| ENSMUSG00000021830 | 618.653    | -1.143 | 0.245 | -4.670  | 3.0E-06 | 1.7936E-05 | Txndc16       |
| ENSMUSG00000008226 | 336.530    | -1.143 | 0.202 | -5.671  | 1.4E-08 | 1.1149E-07 | Scrn3         |
| ENSMUSG00000018909 | 1779.261   | -1.144 | 0.156 | -7.332  | 2.3E-13 | 2.7083E-12 | Arrb1         |
| ENSMUSG00000026388 | 110.340    | -1.145 | 0.319 | -3.589  | 3.3E-04 | 0.00144404 | 3110009E18Rik |
| ENSMUSG00000038147 | 12211.213  | -1.145 | 0.102 | -11.259 | 2.1E-29 | 5.7907E-28 | Cd84          |
| ENSMUSG00000022788 | 1692.458   | -1.146 | 0.160 | -7.168  | 7.6E-13 | 8.6623E-12 | Fgd4          |
| ENSMUSG00000066595 | 1021.510   | -1.146 | 0.168 | -6.804  | 1.0E-11 | 1.0534E-10 | Flvcr1        |
| ENSMUSG00000103591 | 177.199    | -1.146 | 0.347 | -3.303  | 9.6E-04 | 0.00381057 | Gm38365       |
| ENSMUSG00000015766 | 1059.245   | -1.146 | 0.213 | -5.390  | 7.1E-08 | 5.1366E-07 | Eps8          |
| ENSMUSG00000086564 | 89.660     | -1.147 | 0.458 | -2.505  | 1.2E-02 | 0.03740669 | Cd101         |
| ENSMUSG00000030649 | 244.463    | -1.148 | 0.261 | -4.390  | 1.1E-05 | 6.232E-05  | Anapc15       |
| ENSMUSG00000037348 | 1877.816   | -1.148 | 0.196 | -5.865  | 4.5E-09 | 3.7153E-08 | Paqr7         |
| ENSMUSG00000022474 | 796.151    | -1.149 | 0.149 | -7.734  | 1.0E-14 | 1.3485E-13 | Pmm1          |
| ENSMUSG00000018846 | 934.849    | -1.150 | 0.206 | -5.577  | 2.4E-08 | 1.8705E-07 | Pank3         |

|                    |           |        |       |         |          |            |               |
|--------------------|-----------|--------|-------|---------|----------|------------|---------------|
| ENSMUSG00000034714 | 5154.359  | -1.150 | 0.096 | -11.927 | 8.5E-33  | 2.7065E-31 | Ttyh2         |
| ENSMUSG00000074357 | 112.542   | -1.150 | 0.328 | -3.508  | 4.5E-04  | 0.00190749 | AA386476      |
| ENSMUSG00000018821 | 669.042   | -1.150 | 0.179 | -6.425  | 1.3E-10  | 1.2593E-09 | Avpi1         |
| ENSMUSG00000044367 | 431.780   | -1.150 | 0.367 | -3.135  | 1.7E-03  | 0.00651891 | Slc16a13      |
| ENSMUSG00000078515 | 2795.490  | -1.150 | 0.105 | -10.964 | 5.7E-28  | 1.4728E-26 | Ddi2          |
| ENSMUSG00000046567 | 109.564   | -1.152 | 0.334 | -3.447  | 5.7E-04  | 0.00235196 | 4930430F08Rik |
| ENSMUSG00000040997 | 4834.380  | -1.152 | 0.101 | -11.428 | 3.0E-30  | 8.6307E-29 | Abhd4         |
| ENSMUSG00000037926 | 1201.100  | -1.153 | 0.158 | -7.288  | 3.1E-13  | 3.7053E-12 | Ssh2          |
| ENSMUSG00000039018 | 701.896   | -1.153 | 0.190 | -6.053  | 1.4E-09  | 1.2346E-08 | Mtg1          |
| ENSMUSG00000022324 | 178.007   | -1.153 | 0.374 | -3.086  | 2.0E-03  | 0.00757271 | Matn2         |
| ENSMUSG00000020747 | 759.101   | -1.154 | 0.202 | -5.723  | 1.0E-08  | 8.3399E-08 | Tmem94        |
| ENSMUSG00000044442 | 1120.874  | -1.154 | 0.159 | -7.277  | 3.4E-13  | 4.0183E-12 | N6amt1        |
| ENSMUSG00000117775 | 143.753   | -1.156 | 0.380 | -3.039  | 2.4E-03  | 0.00873492 | Gm50462       |
| ENSMUSG00000015852 | 23348.311 | -1.156 | 0.161 | -7.161  | 8.0E-13  | 9.0943E-12 | Fcrls         |
| ENSMUSG00000043065 | 221.580   | -1.160 | 0.373 | -3.109  | 1.9E-03  | 0.0070577  | Spice1        |
| ENSMUSG00000038126 | 196.573   | -1.161 | 0.352 | -3.294  | 9.9E-04  | 0.00392297 | Mphosph9      |
| ENSMUSG00000022351 | 1583.695  | -1.161 | 0.154 | -7.524  | 5.3E-14  | 6.6072E-13 | Sqle          |
| ENSMUSG00000038872 | 780.476   | -1.161 | 0.147 | -7.879  | 3.3E-15  | 4.4168E-14 | Zfhx3         |
| ENSMUSG00000054894 | 216.272   | -1.161 | 0.241 | -4.816  | 1.5E-06  | 9.0315E-06 | Dmac2l        |
| ENSMUSG00000018509 | 296.832   | -1.161 | 0.238 | -4.890  | 1.0E-06  | 6.3465E-06 | Cenpv         |
| ENSMUSG00000038024 | 614.717   | -1.162 | 0.193 | -6.032  | 1.6E-09  | 1.4021E-08 | Dennd4c       |
| ENSMUSG00000026879 | 18255.379 | -1.162 | 0.069 | -16.944 | 2.1E-64  | 1.7899E-62 | Gsn           |
| ENSMUSG00000032549 | 161.166   | -1.162 | 0.386 | -3.010  | 2.6E-03  | 0.00952886 | Rab6b         |
| ENSMUSG00000015112 | 519.013   | -1.163 | 0.239 | -4.870  | 1.1E-06  | 6.9969E-06 | Slc25a13      |
| ENSMUSG00000036181 | 3674.271  | -1.163 | 0.167 | -6.958  | 3.5E-12  | 3.7457E-11 | Hlf2          |
| ENSMUSG00000020773 | 3400.726  | -1.163 | 0.119 | -9.744  | 2.0E-22  | 4.0129E-21 | Trim47        |
| ENSMUSG00000000934 | 220.094   | -1.164 | 0.265 | -4.391  | 1.1E-05  | 6.203E-05  | Top1mt        |
| ENSMUSG00000060181 | 450.242   | -1.165 | 0.170 | -6.866  | 6.6E-12  | 6.9416E-11 | Slc35e3       |
| ENSMUSG00000062585 | 415.802   | -1.166 | 0.331 | -3.521  | 4.3E-04  | 0.00182526 | Cnr2          |
| ENSMUSG00000061887 | 615.339   | -1.166 | 0.245 | -4.765  | 1.9E-06  | 1.1484E-05 | Ssbp3         |
| ENSMUSG00000026688 | 990.323   | -1.166 | 0.152 | -7.690  | 1.5E-14  | 1.8883E-13 | Mgst3         |
| ENSMUSG00000040102 | 388.431   | -1.167 | 0.243 | -4.799  | 1.6E-06  | 9.7764E-06 | Klh142        |
| ENSMUSG00000027533 | 19792.718 | -1.168 | 0.125 | -9.380  | 6.6E-21  | 1.243E-19  | Fabp5         |
| ENSMUSG00000000811 | 293.432   | -1.168 | 0.369 | -3.169  | 1.5E-03  | 0.00585672 | Txnrd3        |
| ENSMUSG00000015961 | 3654.973  | -1.169 | 0.124 | -9.455  | 3.2E-21  | 6.2178E-20 | Adss          |
| ENSMUSG00000024803 | 86.390    | -1.169 | 0.457 | -2.559  | 1.0E-02  | 0.03258313 | Ankrd1        |
| ENSMUSG00000108621 | 319.765   | -1.170 | 0.331 | -3.532  | 4.1E-04  | 0.00175794 | Gm33989       |
| ENSMUSG00000106532 | 33.306    | -1.171 | 0.425 | -2.753  | 5.9E-03  | 0.01976553 | Gm5714        |
| ENSMUSG00000030060 | 1074.975  | -1.171 | 0.150 | -7.812  | 5.6E-15  | 7.4098E-14 | Hmces         |
| ENSMUSG00000103867 | 756.552   | -1.172 | 0.251 | -4.662  | 3.1E-06  | 1.8646E-05 | 9630010A21Rik |
| ENSMUSG00000032411 | 294.041   | -1.172 | 0.243 | -4.821  | 1.4E-06  | 8.8147E-06 | Tfdp2         |
| ENSMUSG00000026019 | 1580.620  | -1.172 | 0.169 | -6.956  | 3.5E-12  | 3.7988E-11 | Wdr12         |
| ENSMUSG00000085795 | 2157.335  | -1.172 | 0.146 | -8.038  | 9.2E-16  | 1.2741E-14 | Zfp703        |
| ENSMUSG00000027200 | 182.131   | -1.174 | 0.383 | -3.062  | 2.2E-03  | 0.00814438 | Sema6d        |
| ENSMUSG00000021048 | 1531.859  | -1.174 | 0.158 | -7.436  | 1.0E-13  | 1.2604E-12 | Mthfd1        |
| ENSMUSG00000006315 | 2936.199  | -1.174 | 0.106 | -11.065 | 1.9E-28  | 4.942E-27  | Tmem147       |
| ENSMUSG00000116097 | 154.545   | -1.174 | 0.254 | -4.623  | 3.8E-06  | 2.2272E-05 | Gm36738       |
| ENSMUSG00000034799 | 280.942   | -1.175 | 0.271 | -4.330  | 1.5E-05  | 8.0454E-05 | Unc13a        |
| ENSMUSG00000025232 | 39619.444 | -1.178 | 0.052 | -22.628 | 2.3E-113 | 5.753E-111 | Hexa          |
| ENSMUSG00000060012 | 1112.391  | -1.179 | 0.138 | -8.534  | 1.4E-17  | 2.2234E-16 | Kif13b        |
| ENSMUSG00000049225 | 1282.477  | -1.179 | 0.171 | -6.917  | 4.6E-12  | 4.9436E-11 | Pdp1          |
| ENSMUSG00000031824 | 1072.857  | -1.179 | 0.221 | -5.326  | 1.0E-07  | 7.1564E-07 | 6430548M08Rik |



|                    |           |        |       |         |         |            |               |
|--------------------|-----------|--------|-------|---------|---------|------------|---------------|
| ENSMUSG00000081926 | 38.567    | -1.181 | 0.442 | -2.672  | 7.5E-03 | 0.02444631 | Gm15536       |
| ENSMUSG00000056612 | 2134.653  | -1.181 | 0.256 | -4.618  | 3.9E-06 | 2.2765E-05 | Ppp1r14b      |
| ENSMUSG00000031169 | 236.103   | -1.181 | 0.304 | -3.884  | 1.0E-04 | 0.00048673 | Porcn         |
| ENSMUSG00000033083 | 607.234   | -1.181 | 0.346 | -3.412  | 6.4E-04 | 0.00264577 | Tbc1d4        |
| ENSMUSG00000107881 | 100.195   | -1.182 | 0.357 | -3.312  | 9.2E-04 | 0.0036893  | Gm44250       |
| ENSMUSG00000085287 | 121.227   | -1.182 | 0.488 | -2.424  | 1.5E-02 | 0.04558271 | 4833418N02Rik |
| ENSMUSG00000008305 | 708.280   | -1.183 | 0.245 | -4.835  | 1.3E-06 | 8.2404E-06 | Tle1          |
| ENSMUSG00000013921 | 136.128   | -1.186 | 0.422 | -2.814  | 4.9E-03 | 0.0167551  | Clip3         |
| ENSMUSG00000032431 | 3531.824  | -1.187 | 0.094 | -12.671 | 8.5E-37 | 3.1325E-35 | Crtap         |
| ENSMUSG00000027624 | 1148.549  | -1.188 | 0.219 | -5.422  | 5.9E-08 | 4.3199E-07 | Epb4111       |
| ENSMUSG00000026471 | 324.992   | -1.188 | 0.327 | -3.632  | 2.8E-04 | 0.00123664 | Mr1           |
| ENSMUSG00000039357 | 1459.117  | -1.190 | 0.182 | -6.551  | 5.7E-11 | 5.5812E-10 | Fut11         |
| ENSMUSG00000047604 | 414.844   | -1.190 | 0.211 | -5.643  | 1.7E-08 | 1.2997E-07 | Frat2         |
| ENSMUSG00000039982 | 2778.250  | -1.190 | 0.120 | -9.940  | 2.8E-23 | 5.9318E-22 | Dtx4          |
| ENSMUSG00000054675 | 605.996   | -1.190 | 0.255 | -4.659  | 3.2E-06 | 1.8879E-05 | Tmem119       |
| ENSMUSG00000040883 | 1266.613  | -1.190 | 0.152 | -7.832  | 4.8E-15 | 6.3655E-14 | Tmem205       |
| ENSMUSG00000005580 | 347.957   | -1.190 | 0.283 | -4.212  | 2.5E-05 | 0.00013136 | Adcy9         |
| ENSMUSG00000028167 | 91.413    | -1.191 | 0.371 | -3.214  | 1.3E-03 | 0.00508085 | Bdh2          |
| ENSMUSG00000031851 | 1512.791  | -1.194 | 0.140 | -8.514  | 1.7E-17 | 2.621E-16  | Ntpcr         |
| ENSMUSG00000060260 | 1813.276  | -1.194 | 0.149 | -8.029  | 9.8E-16 | 1.3639E-14 | Pwpp2b        |
| ENSMUSG00000059540 | 166.164   | -1.195 | 0.294 | -4.062  | 4.9E-05 | 0.00024288 | Tcea2         |
| ENSMUSG00000030515 | 122.532   | -1.196 | 0.443 | -2.702  | 6.9E-03 | 0.0226253  | Tarsl2        |
| ENSMUSG00000039405 | 808.576   | -1.196 | 0.232 | -5.154  | 2.6E-07 | 1.7329E-06 | Prss23        |
| ENSMUSG00000024985 | 8333.063  | -1.197 | 0.153 | -7.846  | 4.3E-15 | 5.7132E-14 | Tcf7l2        |
| ENSMUSG00000023055 | 1340.927  | -1.197 | 0.149 | -8.063  | 7.4E-16 | 1.0426E-14 | Calcoco1      |
| ENSMUSG00000029672 | 2966.072  | -1.198 | 0.126 | -9.515  | 1.8E-21 | 3.5678E-20 | Fam3c         |
| ENSMUSG00000021418 | 272.172   | -1.199 | 0.247 | -4.846  | 1.3E-06 | 7.8472E-06 | Rpp40         |
| ENSMUSG00000024084 | 312.692   | -1.199 | 0.243 | -4.927  | 8.4E-07 | 5.3056E-06 | Qpct          |
| ENSMUSG00000095930 | 79.225    | -1.200 | 0.465 | -2.579  | 9.9E-03 | 0.03101445 | Nim1k         |
| ENSMUSG00000078878 | 35.331    | -1.200 | 0.404 | -2.971  | 3.0E-03 | 0.01068383 | Gm14305       |
| ENSMUSG00000028690 | 622.660   | -1.201 | 0.230 | -5.210  | 1.9E-07 | 1.3022E-06 | Mmachc        |
| ENSMUSG00000035900 | 346.202   | -1.201 | 0.300 | -4.007  | 6.2E-05 | 0.00030352 | Gramd4        |
| ENSMUSG00000026640 | 201.423   | -1.201 | 0.316 | -3.807  | 1.4E-04 | 0.00065288 | Plxna2        |
| ENSMUSG00000001751 | 5994.456  | -1.202 | 0.096 | -12.564 | 3.3E-36 | 1.1954E-34 | Naglu         |
| ENSMUSG00000007989 | 76.320    | -1.202 | 0.427 | -2.813  | 4.9E-03 | 0.01678927 | Fzd3          |
| ENSMUSG00000056999 | 1818.109  | -1.202 | 0.122 | -9.894  | 4.4E-23 | 9.3363E-22 | Ide           |
| ENSMUSG00000075391 | 23.511    | -1.203 | 0.497 | -2.418  | 1.6E-02 | 0.04619549 | Glo1-ps       |
| ENSMUSG00000019943 | 11818.732 | -1.203 | 0.093 | -12.971 | 1.8E-38 | 6.9233E-37 | Atp2b1        |
| ENSMUSG00000031666 | 727.878   | -1.204 | 0.234 | -5.148  | 2.6E-07 | 1.7872E-06 | Rbl2          |
| ENSMUSG00000028957 | 291.146   | -1.204 | 0.316 | -3.812  | 1.4E-04 | 0.00064109 | Per3          |
| ENSMUSG00000072066 | 87.220    | -1.205 | 0.474 | -2.543  | 1.1E-02 | 0.03398584 | 6720489N17Rik |
| ENSMUSG00000021236 | 565.384   | -1.206 | 0.188 | -6.406  | 1.5E-10 | 1.4138E-09 | Entpd5        |
| ENSMUSG00000117662 | 89.097    | -1.206 | 0.319 | -3.782  | 1.6E-04 | 0.00071761 | Gm4013        |
| ENSMUSG00000025262 | 91.319    | -1.207 | 0.502 | -2.405  | 1.6E-02 | 0.04771826 | Fam120c       |
| ENSMUSG00000057134 | 3484.656  | -1.207 | 0.116 | -10.366 | 3.5E-25 | 8.1587E-24 | Ado           |
| ENSMUSG00000010751 | 354.958   | -1.209 | 0.177 | -6.831  | 8.4E-12 | 8.783E-11  | Tnfrsf22      |
| ENSMUSG00000018659 | 789.475   | -1.210 | 0.183 | -6.596  | 4.2E-11 | 4.1863E-10 | Pnpo          |
| ENSMUSG00000001227 | 348.193   | -1.210 | 0.237 | -5.113  | 3.2E-07 | 2.1216E-06 | Sema6b        |
| ENSMUSG00000082286 | 467.019   | -1.210 | 0.197 | -6.150  | 7.8E-10 | 6.9018E-09 | Pisd-ps1      |
| ENSMUSG00000033706 | 1592.475  | -1.211 | 0.167 | -7.234  | 4.7E-13 | 5.4405E-12 | Smyd5         |
| ENSMUSG00000033777 | 6407.338  | -1.212 | 0.120 | -10.122 | 4.4E-24 | 9.7593E-23 | Tlr13         |
| ENSMUSG00000024011 | 174.444   | -1.213 | 0.323 | -3.755  | 1.7E-04 | 0.0007932  | Pi16          |

|                     |           |        |       |         |         |            |               |
|---------------------|-----------|--------|-------|---------|---------|------------|---------------|
| ENSMUSG00000025736  | 151.154   | -1.213 | 0.242 | -5.020  | 5.2E-07 | 3.3547E-06 | Jmjd8         |
| ENSMUSG00000050382  | 83.747    | -1.213 | 0.482 | -2.520  | 1.2E-02 | 0.03605121 | Kif7          |
| ENSMUSG00000074825  | 2950.174  | -1.214 | 0.144 | -8.422  | 3.7E-17 | 5.6343E-16 | Itpril1       |
| ENSMUSG00000086725  | 95.868    | -1.215 | 0.425 | -2.859  | 4.3E-03 | 0.01475915 | A630052C17Rik |
| ENSMUSG00000044145  | 92.874    | -1.215 | 0.309 | -3.932  | 8.4E-05 | 0.0004056  | 1810024B03Rik |
| ENSMUSG00000031808  | 5130.339  | -1.217 | 0.145 | -8.373  | 5.6E-17 | 8.4891E-16 | Slc27a1       |
| ENSMUSG00000037772  | 607.657   | -1.218 | 0.192 | -6.328  | 2.5E-10 | 2.3076E-09 | Mrpl23        |
| ENSMUSG00000070371  | 94.938    | -1.218 | 0.368 | -3.310  | 9.3E-04 | 0.00372483 | Prss36        |
| ENSMUSG00000029338  | 2499.846  | -1.219 | 0.120 | -10.153 | 3.2E-24 | 7.1153E-23 | Antxr2        |
| ENSMUSG00000001020  | 255.655   | -1.220 | 0.211 | -5.793  | 6.9E-09 | 5.5833E-08 | S100a4        |
| ENSMUSG00000019080  | 431.161   | -1.221 | 0.281 | -4.351  | 1.4E-05 | 7.3589E-05 | Mfsd3         |
| ENSMUSG00000066442  | 313.401   | -1.222 | 0.184 | -6.626  | 3.4E-11 | 3.423E-10  | Mthfs         |
| ENSMUSG00000025473  | 37938.987 | -1.223 | 0.119 | -10.292 | 7.7E-25 | 1.7414E-23 | Adam8         |
| ENSMUSG00000054008  | 1287.465  | -1.223 | 0.197 | -6.213  | 5.2E-10 | 4.671E-09  | Ndst1         |
| ENSMUSG00000006611  | 2940.959  | -1.224 | 0.160 | -7.650  | 2.0E-14 | 2.559E-13  | Hfe           |
| ENSMUSG000000113010 | 232.740   | -1.225 | 0.243 | -5.033  | 4.8E-07 | 3.1572E-06 | Gm34084       |
| ENSMUSG00000029098  | 1835.543  | -1.225 | 0.138 | -8.851  | 8.7E-19 | 1.4717E-17 | Acox3         |
| ENSMUSG00000023393  | 362.186   | -1.225 | 0.283 | -4.334  | 1.5E-05 | 7.8954E-05 | Slc17a9       |
| ENSMUSG00000006589  | 10565.541 | -1.226 | 0.088 | -13.967 | 2.5E-44 | 1.1507E-42 | Aprt          |
| ENSMUSG00000078570  | 235.843   | -1.226 | 0.236 | -5.198  | 2.0E-07 | 1.3825E-06 | 1110065P20Rik |
| ENSMUSG00000069755  | 108.858   | -1.227 | 0.304 | -4.037  | 5.4E-05 | 0.00026876 | Zfp125        |
| ENSMUSG00000087679  | 4823.431  | -1.229 | 0.120 | -10.231 | 1.4E-24 | 3.2454E-23 | Tmem250-ps    |
| ENSMUSG00000025190  | 3073.544  | -1.229 | 0.104 | -11.777 | 5.1E-32 | 1.5691E-30 | Got1          |
| ENSMUSG00000024570  | 1291.375  | -1.229 | 0.154 | -7.979  | 1.5E-15 | 2.0124E-14 | Rbfa          |
| ENSMUSG00000045316  | 218.997   | -1.231 | 0.402 | -3.062  | 2.2E-03 | 0.00816392 | Fahd1         |
| ENSMUSG00000096188  | 346.587   | -1.231 | 0.289 | -4.259  | 2.1E-05 | 0.00010818 | Cmtm4         |
| ENSMUSG00000008822  | 322.120   | -1.231 | 0.227 | -5.418  | 6.0E-08 | 4.4233E-07 | Acyp1         |
| ENSMUSG00000042505  | 195.041   | -1.232 | 0.224 | -5.500  | 3.8E-08 | 2.8456E-07 | Sdhaf3        |
| ENSMUSG00000026170  | 723.032   | -1.233 | 0.183 | -6.722  | 1.8E-11 | 1.8212E-10 | Cyp27a1       |
| ENSMUSG00000001095  | 72.160    | -1.233 | 0.514 | -2.401  | 1.6E-02 | 0.04826833 | Slc13a2       |
| ENSMUSG00000064284  | 865.260   | -1.233 | 0.148 | -8.341  | 7.4E-17 | 1.1055E-15 | Cdpfl         |
| ENSMUSG00000040151  | 1466.823  | -1.234 | 0.161 | -7.652  | 2.0E-14 | 2.5214E-13 | Hs2st1        |
| ENSMUSG00000038046  | 524.879   | -1.235 | 0.167 | -7.386  | 1.5E-13 | 1.8279E-12 | Mrm3          |
| ENSMUSG00000026017  | 249.881   | -1.236 | 0.292 | -4.234  | 2.3E-05 | 0.00012046 | Carf          |
| ENSMUSG00000025037  | 184.636   | -1.236 | 0.407 | -3.038  | 2.4E-03 | 0.00875019 | Maoa          |
| ENSMUSG00000022947  | 996.962   | -1.238 | 0.193 | -6.400  | 1.6E-10 | 1.4737E-09 | Cbr3          |
| ENSMUSG00000053580  | 562.802   | -1.238 | 0.218 | -5.673  | 1.4E-08 | 1.105E-07  | Tanc2         |
| ENSMUSG00000001999  | 5604.838  | -1.239 | 0.114 | -10.902 | 1.1E-27 | 2.8793E-26 | Blvra         |
| ENSMUSG000000103822 | 34.745    | -1.239 | 0.487 | -2.547  | 1.1E-02 | 0.03368844 | 6030460B20Rik |
| ENSMUSG00000033068  | 1041.631  | -1.240 | 0.158 | -7.849  | 4.2E-15 | 5.5655E-14 | Entpd6        |
| ENSMUSG00000039345  | 380.904   | -1.241 | 0.255 | -4.868  | 1.1E-06 | 7.0652E-06 | Mettl22       |
| ENSMUSG00000000823  | 363.592   | -1.241 | 0.225 | -5.526  | 3.3E-08 | 2.4777E-07 | Zfp512b       |
| ENSMUSG00000068747  | 1287.758  | -1.241 | 0.241 | -5.152  | 2.6E-07 | 1.7478E-06 | Sort1         |
| ENSMUSG00000021253  | 587.315   | -1.242 | 0.203 | -6.121  | 9.3E-10 | 8.1859E-09 | Tgfb3         |
| ENSMUSG00000022546  | 157.823   | -1.242 | 0.413 | -3.006  | 2.6E-03 | 0.00964051 | Gpt           |
| ENSMUSG00000035443  | 2294.735  | -1.244 | 0.087 | -14.289 | 2.6E-46 | 1.2607E-44 | Thyn1         |
| ENSMUSG00000073792  | 309.905   | -1.244 | 0.248 | -5.009  | 5.5E-07 | 3.5555E-06 | Alg6          |
| ENSMUSG00000020988  | 141.593   | -1.244 | 0.475 | -2.618  | 8.9E-03 | 0.02814945 | L2hgdh        |
| ENSMUSG00000045382  | 299.418   | -1.244 | 0.218 | -5.703  | 1.2E-08 | 9.3347E-08 | Cxcr4         |
| ENSMUSG00000043252  | 421.185   | -1.245 | 0.221 | -5.626  | 1.8E-08 | 1.4307E-07 | Tmem64        |
| ENSMUSG00000030431  | 312.145   | -1.245 | 0.255 | -4.886  | 1.0E-06 | 6.4827E-06 | Tmem238       |
| ENSMUSG00000002365  | 4553.660  | -1.245 | 0.089 | -14.067 | 6.1E-45 | 2.899E-43  | Snx9          |

|                    |           |        |       |         |         |            |               |
|--------------------|-----------|--------|-------|---------|---------|------------|---------------|
| ENSMUSG00000033735 | 1464.785  | -1.246 | 0.135 | -9.226  | 2.8E-20 | 5.127E-19  | Spr           |
| ENSMUSG00000040907 | 3349.494  | -1.246 | 0.128 | -9.718  | 2.5E-22 | 5.1504E-21 | Atp1a3        |
| ENSMUSG00000030541 | 3452.556  | -1.246 | 0.098 | -12.740 | 3.6E-37 | 1.3214E-35 | Idh2          |
| ENSMUSG00000006219 | 5839.843  | -1.247 | 0.111 | -11.258 | 2.1E-29 | 5.8069E-28 | Fblim1        |
| ENSMUSG00000034659 | 5106.267  | -1.248 | 0.091 | -13.725 | 7.2E-43 | 3.2131E-41 | Tmem109       |
| ENSMUSG00000083097 | 32.180    | -1.248 | 0.418 | -2.986  | 2.8E-03 | 0.01023439 | Gm14494       |
| ENSMUSG00000025421 | 63.491    | -1.249 | 0.354 | -3.524  | 4.3E-04 | 0.00180933 | Hdhd2         |
| ENSMUSG00000021549 | 3480.995  | -1.249 | 0.139 | -8.987  | 2.5E-19 | 4.4499E-18 | Rasa1         |
| ENSMUSG00000031617 | 1262.083  | -1.249 | 0.199 | -6.266  | 3.7E-10 | 3.3981E-09 | Tmem184c      |
| ENSMUSG00000031788 | 243.347   | -1.250 | 0.310 | -4.037  | 5.4E-05 | 0.00026876 | Kifc3         |
| ENSMUSG00000027488 | 1236.516  | -1.251 | 0.149 | -8.379  | 5.3E-17 | 8.0856E-16 | Snta1         |
| ENSMUSG00000017740 | 66.012    | -1.251 | 0.517 | -2.419  | 1.6E-02 | 0.04617878 | Slc12a5       |
| ENSMUSG00000033530 | 137.458   | -1.253 | 0.414 | -3.026  | 2.5E-03 | 0.00906905 | Ttc7b         |
| ENSMUSG00000026409 | 133.560   | -1.254 | 0.325 | -3.865  | 1.1E-04 | 0.00052362 | Pfkfb2        |
| ENSMUSG00000114931 | 35.408    | -1.255 | 0.433 | -2.897  | 3.8E-03 | 0.01322066 | Gm32256       |
| ENSMUSG00000026126 | 1728.695  | -1.255 | 0.100 | -12.514 | 6.3E-36 | 2.2211E-34 | Ptpn18        |
| ENSMUSG00000115039 | 45.180    | -1.255 | 0.360 | -3.489  | 4.8E-04 | 0.00203666 | Gm7043        |
| ENSMUSG00000026469 | 998.453   | -1.256 | 0.134 | -9.351  | 8.7E-21 | 1.6301E-19 | Xpr1          |
| ENSMUSG00000021023 | 322.310   | -1.256 | 0.227 | -5.533  | 3.1E-08 | 2.3792E-07 | Prorp         |
| ENSMUSG00000029312 | 237.516   | -1.259 | 0.309 | -4.080  | 4.5E-05 | 0.0002261  | Klh18         |
| ENSMUSG00000078700 | 335.241   | -1.260 | 0.248 | -5.086  | 3.7E-07 | 2.4346E-06 | D030028A08Rik |
| ENSMUSG00000045414 | 658.296   | -1.260 | 0.442 | -2.850  | 4.4E-03 | 0.0151394  | Dipk2a        |
| ENSMUSG00000041684 | 248.094   | -1.260 | 0.279 | -4.525  | 6.0E-06 | 3.4506E-05 | Bivm          |
| ENSMUSG00000095098 | 859.788   | -1.260 | 0.188 | -6.715  | 1.9E-11 | 1.903E-10  | Ccdc85b       |
| ENSMUSG00000113430 | 54.316    | -1.261 | 0.362 | -3.484  | 4.9E-04 | 0.00207434 | Gm47086       |
| ENSMUSG00000024395 | 114.091   | -1.262 | 0.427 | -2.955  | 3.1E-03 | 0.01120026 | Lims2         |
| ENSMUSG00000059479 | 1602.328  | -1.262 | 0.184 | -6.865  | 6.6E-12 | 6.9842E-11 | B3gnt8        |
| ENSMUSG00000034807 | 6120.587  | -1.263 | 0.101 | -12.510 | 6.5E-36 | 2.3139E-34 | Colgalt1      |
| ENSMUSG00000025195 | 288.626   | -1.263 | 0.306 | -4.133  | 3.6E-05 | 0.00018196 | Dnmbp         |
| ENSMUSG00000029475 | 1177.289  | -1.266 | 0.133 | -9.531  | 1.6E-21 | 3.0653E-20 | Kdm2b         |
| ENSMUSG00000029570 | 1616.690  | -1.267 | 0.136 | -9.341  | 9.5E-21 | 1.7876E-19 | Lfng          |
| ENSMUSG00000044345 | 135.469   | -1.267 | 0.405 | -3.129  | 1.8E-03 | 0.00662982 | Marveld1      |
| ENSMUSG00000082895 | 23.078    | -1.268 | 0.517 | -2.455  | 1.4E-02 | 0.04234426 | Rpsa-ps9      |
| ENSMUSG00000031217 | 856.469   | -1.269 | 0.206 | -6.166  | 7.0E-10 | 6.2377E-09 | Efnb1         |
| ENSMUSG00000060166 | 843.868   | -1.269 | 0.203 | -6.248  | 4.2E-10 | 3.7855E-09 | Zdhhc8        |
| ENSMUSG00000024132 | 1537.877  | -1.270 | 0.116 | -10.947 | 6.9E-28 | 1.7759E-26 | Eci1          |
| ENSMUSG00000015944 | 997.388   | -1.270 | 0.221 | -5.751  | 8.9E-09 | 7.1073E-08 | Castor2       |
| ENSMUSG00000028461 | 1132.214  | -1.271 | 0.120 | -10.613 | 2.6E-26 | 6.2713E-25 | Ccdc107       |
| ENSMUSG00000020812 | 146.049   | -1.272 | 0.340 | -3.746  | 1.8E-04 | 0.00081942 | Snhg16        |
| ENSMUSG00000032513 | 1093.472  | -1.274 | 0.135 | -9.428  | 4.2E-21 | 8.0352E-20 | Gorasp1       |
| ENSMUSG00000040557 | 176.279   | -1.274 | 0.400 | -3.183  | 1.5E-03 | 0.00561341 | Mettl27       |
| ENSMUSG00000037643 | 931.238   | -1.275 | 0.159 | -8.008  | 1.2E-15 | 1.6058E-14 | Prkci         |
| ENSMUSG00000029521 | 582.075   | -1.275 | 0.268 | -4.760  | 1.9E-06 | 1.1762E-05 | Chek2         |
| ENSMUSG00000021306 | 2376.212  | -1.276 | 0.159 | -8.006  | 1.2E-15 | 1.6376E-14 | Gpr137b       |
| ENSMUSG00000101225 | 87.465    | -1.277 | 0.320 | -3.992  | 6.6E-05 | 0.00032134 | 1700008J07Rik |
| ENSMUSG00000103906 | 246.501   | -1.277 | 0.384 | -3.323  | 8.9E-04 | 0.00355598 | Tigd5         |
| ENSMUSG00000035640 | 238.792   | -1.277 | 0.341 | -3.750  | 1.8E-04 | 0.00080797 | Cbarp         |
| ENSMUSG00000030714 | 554.536   | -1.279 | 0.187 | -6.833  | 8.3E-12 | 8.6983E-11 | Sgf29         |
| ENSMUSG00000037251 | 884.010   | -1.280 | 0.150 | -8.505  | 1.8E-17 | 2.8316E-16 | Pomk          |
| ENSMUSG00000054027 | 257.632   | -1.280 | 0.225 | -5.700  | 1.2E-08 | 9.4894E-08 | Nt5dc3        |
| ENSMUSG00000042286 | 12617.735 | -1.281 | 0.143 | -8.945  | 3.7E-19 | 6.4496E-18 | Stab1         |
| ENSMUSG00000031925 | 979.282   | -1.282 | 0.187 | -6.838  | 8.0E-12 | 8.4141E-11 | Maml2         |

|                    |           |        |       |         |         |            |               |
|--------------------|-----------|--------|-------|---------|---------|------------|---------------|
| ENSMUSG00000036103 | 1656.872  | -1.283 | 0.182 | -7.038  | 2.0E-12 | 2.1528E-11 | Colec12       |
| ENSMUSG00000025932 | 197.110   | -1.283 | 0.460 | -2.791  | 5.2E-03 | 0.01783393 | Eya1          |
| ENSMUSG00000049882 | 749.291   | -1.283 | 0.147 | -8.703  | 3.2E-18 | 5.2737E-17 | Vcpkmt        |
| ENSMUSG00000025436 | 348.750   | -1.284 | 0.280 | -4.584  | 4.6E-06 | 2.6459E-05 | Atp23         |
| ENSMUSG00000028973 | 1160.678  | -1.284 | 0.211 | -6.090  | 1.1E-09 | 9.9165E-09 | Abcb8         |
| ENSMUSG00000041126 | 2525.689  | -1.284 | 0.127 | -10.075 | 7.2E-24 | 1.5674E-22 | H2az2         |
| ENSMUSG00000062866 | 1124.451  | -1.285 | 0.183 | -7.008  | 2.4E-12 | 2.658E-11  | Phactr2       |
| ENSMUSG00000038545 | 190.238   | -1.286 | 0.396 | -3.243  | 1.2E-03 | 0.00463038 | Cul7          |
| ENSMUSG00000097145 | 146.299   | -1.286 | 0.312 | -4.123  | 3.7E-05 | 0.00018951 | 9230114K14Rik |
| ENSMUSG00000046806 | 188.098   | -1.287 | 0.312 | -4.129  | 3.6E-05 | 0.0001848  | Cyren         |
| ENSMUSG00000101856 | 202.567   | -1.287 | 0.287 | -4.482  | 7.4E-06 | 4.1859E-05 | 1700096K18Rik |
| ENSMUSG00000039914 | 876.909   | -1.288 | 0.136 | -9.483  | 2.5E-21 | 4.7944E-20 | Coq10a        |
| ENSMUSG00000025534 | 11246.847 | -1.289 | 0.065 | -19.842 | 1.3E-87 | 1.8276E-85 | Gusb          |
| ENSMUSG00000061536 | 324.650   | -1.289 | 0.299 | -4.307  | 1.7E-05 | 8.8495E-05 | Sec22c        |
| ENSMUSG00000002803 | 348.708   | -1.289 | 0.285 | -4.518  | 6.2E-06 | 3.5571E-05 | Btbd6         |
| ENSMUSG00000027111 | 4593.789  | -1.290 | 0.167 | -7.731  | 1.1E-14 | 1.3735E-13 | Itga6         |
| ENSMUSG00000025511 | 4783.961  | -1.290 | 0.092 | -14.053 | 7.4E-45 | 3.5116E-43 | Tspan4        |
| ENSMUSG00000032782 | 158.872   | -1.290 | 0.295 | -4.376  | 1.2E-05 | 6.6136E-05 | Cntrob        |
| ENSMUSG00000005583 | 2482.033  | -1.291 | 0.162 | -7.990  | 1.4E-15 | 1.8578E-14 | Mef2c         |
| ENSMUSG00000030505 | 1958.049  | -1.292 | 0.151 | -8.553  | 1.2E-17 | 1.8986E-16 | Prmt3         |
| ENSMUSG00000032228 | 1630.596  | -1.293 | 0.140 | -9.231  | 2.7E-20 | 4.9063E-19 | Tcf12         |
| ENSMUSG00000021286 | 1000.743  | -1.293 | 0.223 | -5.806  | 6.4E-09 | 5.2191E-08 | Zfyve21       |
| ENSMUSG00000095362 | 105.557   | -1.295 | 0.278 | -4.658  | 3.2E-06 | 1.8983E-05 | Gm14325       |
| ENSMUSG00000017466 | 10164.897 | -1.295 | 0.115 | -11.259 | 2.1E-29 | 5.7907E-28 | Timp2         |
| ENSMUSG00000080875 | 31.141    | -1.300 | 0.529 | -2.457  | 1.4E-02 | 0.04207852 | Gm7332        |
| ENSMUSG00000040390 | 497.217   | -1.302 | 0.223 | -5.840  | 5.2E-09 | 4.298E-08  | Map3k10       |
| ENSMUSG00000028121 | 1134.723  | -1.302 | 0.219 | -5.957  | 2.6E-09 | 2.1705E-08 | Bcar3         |
| ENSMUSG00000048644 | 79.618    | -1.303 | 0.495 | -2.634  | 8.4E-03 | 0.02699744 | Ctxn1         |
| ENSMUSG00000057329 | 832.400   | -1.303 | 0.222 | -5.866  | 4.5E-09 | 3.7004E-08 | Bcl2          |
| ENSMUSG00000020399 | 732.069   | -1.304 | 0.280 | -4.649  | 3.3E-06 | 1.9709E-05 | Havcr2        |
| ENSMUSG00000086859 | 569.373   | -1.305 | 0.150 | -8.675  | 4.1E-18 | 6.7296E-17 | Snhg20        |
| ENSMUSG00000018427 | 265.027   | -1.305 | 0.352 | -3.710  | 2.1E-04 | 0.00093243 | Ypel2         |
| ENSMUSG00000061838 | 534.303   | -1.305 | 0.198 | -6.608  | 3.9E-11 | 3.8584E-10 | Suclg2        |
| ENSMUSG00000023044 | 600.630   | -1.306 | 0.255 | -5.118  | 3.1E-07 | 2.0677E-06 | Csad          |
| ENSMUSG00000060147 | 7542.835  | -1.308 | 0.087 | -14.966 | 1.2E-50 | 6.892E-49  | Serpib6a      |
| ENSMUSG00000049130 | 57691.485 | -1.308 | 0.113 | -11.592 | 4.5E-31 | 1.3277E-29 | C5ar1         |
| ENSMUSG00000031668 | 389.112   | -1.308 | 0.347 | -3.768  | 1.6E-04 | 0.00075687 | Eif2ak3       |
| ENSMUSG00000025050 | 350.348   | -1.309 | 0.258 | -5.065  | 4.1E-07 | 2.6873E-06 | Pcgf6         |
| ENSMUSG00000032377 | 86.459    | -1.312 | 0.526 | -2.496  | 1.3E-02 | 0.03823023 | Plscr4        |
| ENSMUSG00000024507 | 3366.178  | -1.313 | 0.123 | -10.685 | 1.2E-26 | 2.9166E-25 | Hsd17b4       |
| ENSMUSG00000097715 | 4563.800  | -1.313 | 0.115 | -11.454 | 2.3E-30 | 6.4771E-29 | Gpr137b-ps    |
| ENSMUSG00000089774 | 604.057   | -1.313 | 0.246 | -5.329  | 9.9E-08 | 7.0414E-07 | Slc5a3        |
| ENSMUSG00000040710 | 1293.020  | -1.315 | 0.179 | -7.337  | 2.2E-13 | 2.6086E-12 | St8sia4       |
| ENSMUSG00000079003 | 137.419   | -1.316 | 0.344 | -3.825  | 1.3E-04 | 0.00061134 | Samd1         |
| ENSMUSG00000020648 | 88.948    | -1.316 | 0.395 | -3.336  | 8.5E-04 | 0.00341745 | Dus41         |
| ENSMUSG00000041570 | 415.195   | -1.318 | 0.206 | -6.388  | 1.7E-10 | 1.5872E-09 | Camsap2       |
| ENSMUSG00000045757 | 237.423   | -1.319 | 0.308 | -4.279  | 1.9E-05 | 9.9847E-05 | Zfp764        |
| ENSMUSG00000023805 | 616.507   | -1.319 | 0.218 | -6.062  | 1.3E-09 | 1.17E-08   | Synj2         |
| ENSMUSG00000090100 | 68.388    | -1.320 | 0.456 | -2.896  | 3.8E-03 | 0.01327573 | Ttbk2         |
| ENSMUSG00000000326 | 5550.533  | -1.321 | 0.085 | -15.548 | 1.7E-54 | 1.0346E-52 | Comt          |
| ENSMUSG00000009566 | 488.968   | -1.321 | 0.182 | -7.248  | 4.2E-13 | 4.9214E-12 | Fpgs          |
| ENSMUSG00000091337 | 2273.570  | -1.321 | 0.126 | -10.517 | 7.2E-26 | 1.6971E-24 | Eid1          |

|                    |           |        |       |         |         |            |               |
|--------------------|-----------|--------|-------|---------|---------|------------|---------------|
| ENSMUSG00000018809 | 367.151   | -1.323 | 0.257 | -5.154  | 2.6E-07 | 1.7341E-06 | Smyd4         |
| ENSMUSG00000025375 | 539.087   | -1.325 | 0.335 | -3.958  | 7.6E-05 | 0.00036611 | Aatk          |
| ENSMUSG00000042745 | 5825.583  | -1.325 | 0.127 | -10.442 | 1.6E-25 | 3.6953E-24 | Id1           |
| ENSMUSG00000033429 | 1333.576  | -1.327 | 0.151 | -8.811  | 1.2E-18 | 2.0782E-17 | Mcee          |
| ENSMUSG00000028019 | 687.223   | -1.327 | 0.207 | -6.395  | 1.6E-10 | 1.5222E-09 | Pdgc          |
| ENSMUSG00000072115 | 135.373   | -1.327 | 0.295 | -4.500  | 6.8E-06 | 3.8508E-05 | Ang           |
| ENSMUSG00000033697 | 571.576   | -1.328 | 0.221 | -6.022  | 1.7E-09 | 1.4818E-08 | Arhgap39      |
| ENSMUSG00000109771 | 34.751    | -1.329 | 0.554 | -2.397  | 1.7E-02 | 0.04865466 | Gm35315       |
| ENSMUSG00000040139 | 690.800   | -1.329 | 0.168 | -7.918  | 2.4E-15 | 3.2599E-14 | 9430038I01Rik |
| ENSMUSG00000117310 | 56.274    | -1.330 | 0.443 | -3.004  | 2.7E-03 | 0.00969468 | Ptp4a1        |
| ENSMUSG00000052557 | 751.791   | -1.332 | 0.187 | -7.110  | 1.2E-12 | 1.2989E-11 | Gan           |
| ENSMUSG00000004748 | 93.755    | -1.333 | 0.431 | -3.090  | 2.0E-03 | 0.00748573 | Mtfp1         |
| ENSMUSG00000110062 | 57.854    | -1.333 | 0.461 | -2.890  | 3.9E-03 | 0.0134937  | B430319F04Rik |
| ENSMUSG00000053553 | 1101.764  | -1.333 | 0.201 | -6.628  | 3.4E-11 | 3.3906E-10 | 3110082I17Rik |
| ENSMUSG00000004347 | 92.439    | -1.335 | 0.280 | -4.771  | 1.8E-06 | 1.1197E-05 | Pdelc         |
| ENSMUSG00000040563 | 168.347   | -1.337 | 0.433 | -3.088  | 2.0E-03 | 0.00752013 | Plppr2        |
| ENSMUSG00000076435 | 92.552    | -1.338 | 0.398 | -3.358  | 7.8E-04 | 0.00317101 | Acsf2         |
| ENSMUSG00000026492 | 292.132   | -1.339 | 0.220 | -6.079  | 1.2E-09 | 1.0546E-08 | Tfb2m         |
| ENSMUSG00000034557 | 101.730   | -1.339 | 0.395 | -3.386  | 7.1E-04 | 0.00289151 | Zfyve9        |
| ENSMUSG00000078317 | 944.394   | -1.339 | 0.201 | -6.670  | 2.5E-11 | 2.5602E-10 | F8a           |
| ENSMUSG00000032403 | 166.771   | -1.340 | 0.214 | -6.260  | 3.8E-10 | 3.5246E-09 | 2300009A05Rik |
| ENSMUSG00000041607 | 1267.539  | -1.341 | 0.111 | -12.125 | 7.8E-34 | 2.5613E-32 | Mbp           |
| ENSMUSG00000015854 | 9020.575  | -1.341 | 0.114 | -11.772 | 5.4E-32 | 1.6541E-30 | Cd5l          |
| ENSMUSG00000070858 | 528.936   | -1.342 | 0.201 | -6.685  | 2.3E-11 | 2.3367E-10 | Gm1673        |
| ENSMUSG00000038618 | 182.202   | -1.343 | 0.410 | -3.277  | 1.0E-03 | 0.00414022 | Rassf7        |
| ENSMUSG00000010051 | 349.167   | -1.345 | 0.210 | -6.395  | 1.6E-10 | 1.5223E-09 | Hyal1         |
| ENSMUSG00000002329 | 1097.008  | -1.345 | 0.162 | -8.286  | 1.2E-16 | 1.7317E-15 | Mdp1          |
| ENSMUSG00000032598 | 1149.338  | -1.346 | 0.191 | -7.046  | 1.8E-12 | 2.036E-11  | Nckipsd       |
| ENSMUSG00000032601 | 1781.201  | -1.349 | 0.135 | -9.961  | 2.2E-23 | 4.8293E-22 | Prkar2a       |
| ENSMUSG00000020650 | 2603.368  | -1.351 | 0.120 | -11.217 | 3.4E-29 | 9.237E-28  | Bcap29        |
| ENSMUSG00000022526 | 360.615   | -1.355 | 0.305 | -4.443  | 8.9E-06 | 4.9626E-05 | Zfp251        |
| ENSMUSG00000100975 | 1950.686  | -1.355 | 0.166 | -8.146  | 3.8E-16 | 5.3735E-15 | Gm28875       |
| ENSMUSG00000054364 | 4137.274  | -1.356 | 0.134 | -10.152 | 3.3E-24 | 7.2231E-23 | Rhob          |
| ENSMUSG00000061273 | 840.212   | -1.359 | 0.200 | -6.784  | 1.2E-11 | 1.202E-10  | Mmgt1         |
| ENSMUSG00000037341 | 349.830   | -1.359 | 0.272 | -4.988  | 6.1E-07 | 3.9401E-06 | Slc9a7        |
| ENSMUSG00000007570 | 827.611   | -1.360 | 0.174 | -7.800  | 6.2E-15 | 8.0952E-14 | Fance         |
| ENSMUSG00000066026 | 22994.025 | -1.360 | 0.102 | -13.288 | 2.7E-40 | 1.1253E-38 | Dhrs3         |
| ENSMUSG00000037003 | 168.826   | -1.361 | 0.429 | -3.172  | 1.5E-03 | 0.00580405 | Tns2          |
| ENSMUSG00000025766 | 187.646   | -1.362 | 0.318 | -4.278  | 1.9E-05 | 0.0001001  | D3Erd751e     |
| ENSMUSG00000029560 | 4465.923  | -1.363 | 0.123 | -11.097 | 1.3E-28 | 3.4597E-27 | Snx8          |
| ENSMUSG00000063652 | 148.768   | -1.363 | 0.361 | -3.775  | 1.6E-04 | 0.00073498 | Slc22a21      |
| ENSMUSG00000037316 | 485.739   | -1.363 | 0.208 | -6.542  | 6.1E-11 | 5.9095E-10 | Bag4          |
| ENSMUSG00000028063 | 23025.457 | -1.365 | 0.094 | -14.557 | 5.3E-48 | 2.7261E-46 | Lmna          |
| ENSMUSG00000059708 | 122.977   | -1.365 | 0.417 | -3.276  | 1.1E-03 | 0.00416423 | Akap17b       |
| ENSMUSG00000001552 | 1317.145  | -1.365 | 0.186 | -7.348  | 2.0E-13 | 2.4142E-12 | Jup           |
| ENSMUSG00000087523 | 20.217    | -1.366 | 0.560 | -2.441  | 1.5E-02 | 0.0437167  | Gm12319       |
| ENSMUSG00000029844 | 50.244    | -1.367 | 0.545 | -2.507  | 1.2E-02 | 0.03723768 | Hoxa1         |
| ENSMUSG00000048706 | 300.335   | -1.369 | 0.379 | -3.615  | 3.0E-04 | 0.00131399 | Lurap11       |
| ENSMUSG00000028370 | 179.153   | -1.370 | 0.439 | -3.119  | 1.8E-03 | 0.00683768 | Pappa         |
| ENSMUSG00000027663 | 1219.227  | -1.371 | 0.142 | -9.624  | 6.4E-22 | 1.2682E-20 | Zmat3         |
| ENSMUSG00000035642 | 373.481   | -1.372 | 0.226 | -6.075  | 1.2E-09 | 1.0792E-08 | Aamdc         |
| ENSMUSG00000048120 | 3477.293  | -1.373 | 0.161 | -8.537  | 1.4E-17 | 2.1717E-16 | Entpd1        |

|                    |           |        |       |         |         |            |          |
|--------------------|-----------|--------|-------|---------|---------|------------|----------|
| ENSMUSG00000062519 | 319.806   | -1.374 | 0.332 | -4.134  | 3.6E-05 | 0.00018098 | Zfp398   |
| ENSMUSG00000018474 | 753.907   | -1.375 | 0.238 | -5.783  | 7.3E-09 | 5.9294E-08 | Chd3     |
| ENSMUSG00000028988 | 1244.419  | -1.375 | 0.138 | -9.954  | 2.4E-23 | 5.1745E-22 | Ctnnbip1 |
| ENSMUSG00000060376 | 191.560   | -1.375 | 0.263 | -5.228  | 1.7E-07 | 1.1882E-06 | Bckdha   |
| ENSMUSG00000072774 | 139.322   | -1.375 | 0.422 | -3.259  | 1.1E-03 | 0.00439526 | Zfp951   |
| ENSMUSG00000044629 | 304.284   | -1.376 | 0.312 | -4.415  | 1.0E-05 | 5.5819E-05 | Cnrip1   |
| ENSMUSG00000041220 | 207.038   | -1.377 | 0.325 | -4.243  | 2.2E-05 | 0.00011591 | Elov16   |
| ENSMUSG00000002393 | 963.061   | -1.379 | 0.182 | -7.563  | 3.9E-14 | 4.9123E-13 | Nr2f6    |
| ENSMUSG00000042500 | 396.947   | -1.379 | 0.218 | -6.321  | 2.6E-10 | 2.4119E-09 | Ago4     |
| ENSMUSG00000021928 | 665.985   | -1.379 | 0.162 | -8.536  | 1.4E-17 | 2.1905E-16 | Ebp1     |
| ENSMUSG00000004996 | 1232.363  | -1.380 | 0.170 | -8.096  | 5.7E-16 | 7.9947E-15 | Mri1     |
| ENSMUSG00000001761 | 402.417   | -1.382 | 0.250 | -5.532  | 3.2E-08 | 2.3876E-07 | Smo      |
| ENSMUSG00000097174 | 87.246    | -1.386 | 0.441 | -3.139  | 1.7E-03 | 0.00642695 | Gm4890   |
| ENSMUSG00000048720 | 317.750   | -1.388 | 0.254 | -5.466  | 4.6E-08 | 3.417E-07  | Tbc1d12  |
| ENSMUSG00000018405 | 695.946   | -1.390 | 0.154 | -9.052  | 1.4E-19 | 2.4797E-18 | Mrm1     |
| ENSMUSG00000106847 | 326.100   | -1.390 | 0.318 | -4.372  | 1.2E-05 | 6.7103E-05 | Peg13    |
| ENSMUSG00000074785 | 1162.788  | -1.391 | 0.314 | -4.424  | 9.7E-06 | 5.3833E-05 | Plxnc1   |
| ENSMUSG00000070873 | 78.063    | -1.393 | 0.534 | -2.609  | 9.1E-03 | 0.02873104 | Lilra5   |
| ENSMUSG00000062980 | 145.168   | -1.394 | 0.289 | -4.827  | 1.4E-06 | 8.5832E-06 | Cped1    |
| ENSMUSG00000024158 | 2089.920  | -1.394 | 0.119 | -11.755 | 6.6E-32 | 2.0086E-30 | Hagh     |
| ENSMUSG00000104704 | 52.639    | -1.394 | 0.452 | -3.086  | 2.0E-03 | 0.00756896 | Gm43133  |
| ENSMUSG00000055067 | 342.446   | -1.396 | 0.264 | -5.277  | 1.3E-07 | 9.238E-07  | Smyd3    |
| ENSMUSG00000030557 | 5338.536  | -1.397 | 0.118 | -11.841 | 2.4E-32 | 7.5156E-31 | Mef2a    |
| ENSMUSG00000020829 | 440.867   | -1.398 | 0.354 | -3.946  | 7.9E-05 | 0.00038355 | Slc46a1  |
| ENSMUSG00000016503 | 360.918   | -1.401 | 0.208 | -6.741  | 1.6E-11 | 1.5996E-10 | Gtf3a    |
| ENSMUSG00000014329 | 311.063   | -1.406 | 0.231 | -6.080  | 1.2E-09 | 1.0496E-08 | Bicc1    |
| ENSMUSG00000040713 | 70181.604 | -1.408 | 0.077 | -18.248 | 2.2E-74 | 2.246E-72  | Creg1    |
| ENSMUSG00000039568 | 4949.393  | -1.408 | 0.093 | -15.192 | 4.0E-52 | 2.3208E-50 | Ubald1   |
| ENSMUSG00000060261 | 2230.075  | -1.410 | 0.150 | -9.384  | 6.3E-21 | 1.2006E-19 | Gtf2i    |
| ENSMUSG00000049536 | 78.180    | -1.410 | 0.489 | -2.882  | 4.0E-03 | 0.01380824 | Tceal1   |
| ENSMUSG00000041949 | 253.294   | -1.411 | 0.252 | -5.597  | 2.2E-08 | 1.6747E-07 | Tango6   |
| ENSMUSG00000044066 | 631.534   | -1.412 | 0.216 | -6.549  | 5.8E-11 | 5.6459E-10 | Cep68    |
| ENSMUSG00000002346 | 97.281    | -1.413 | 0.513 | -2.757  | 5.8E-03 | 0.01952376 | Slc25a42 |
| ENSMUSG00000037999 | 233.373   | -1.414 | 0.230 | -6.150  | 7.7E-10 | 6.8797E-09 | Arap2    |
| ENSMUSG00000062861 | 235.975   | -1.415 | 0.322 | -4.398  | 1.1E-05 | 6.0281E-05 | Zfp28    |
| ENSMUSG00000056209 | 129.953   | -1.418 | 0.276 | -5.127  | 2.9E-07 | 1.98E-06   | Npm3     |
| ENSMUSG00000060950 | 1388.250  | -1.419 | 0.177 | -8.039  | 9.1E-16 | 1.2625E-14 | Trmt61a  |
| ENSMUSG00000074166 | 131.920   | -1.421 | 0.356 | -3.987  | 6.7E-05 | 0.00032763 | AW146154 |
| ENSMUSG00000018740 | 145.316   | -1.423 | 0.355 | -4.003  | 6.3E-05 | 0.00030769 | Slc25a35 |
| ENSMUSG00000026932 | 884.137   | -1.424 | 0.205 | -6.952  | 3.6E-12 | 3.8883E-11 | Nacc2    |
| ENSMUSG00000054612 | 792.266   | -1.424 | 0.140 | -10.155 | 3.1E-24 | 6.9836E-23 | Mgmt     |
| ENSMUSG00000055296 | 639.256   | -1.424 | 0.194 | -7.330  | 2.3E-13 | 2.7445E-12 | Tmem245  |
| ENSMUSG00000073176 | 77.650    | -1.426 | 0.581 | -2.454  | 1.4E-02 | 0.04236527 | Zfp449   |
| ENSMUSG00000050627 | 864.426   | -1.426 | 0.178 | -8.008  | 1.2E-15 | 1.6154E-14 | Gpd11    |
| ENSMUSG00000002319 | 749.627   | -1.426 | 0.161 | -8.856  | 8.3E-19 | 1.408E-17  | Ipo4     |
| ENSMUSG00000056666 | 949.886   | -1.427 | 0.153 | -9.319  | 1.2E-20 | 2.2003E-19 | Retsat   |
| ENSMUSG00000110945 | 102.710   | -1.431 | 0.395 | -3.621  | 2.9E-04 | 0.00128826 | Gm9856   |
| ENSMUSG00000044811 | 8286.260  | -1.432 | 0.097 | -14.736 | 3.8E-49 | 2.0562E-47 | Cd300c2  |
| ENSMUSG00000062981 | 3386.470  | -1.436 | 0.121 | -11.906 | 1.1E-32 | 3.4821E-31 | Mrp142   |
| ENSMUSG00000052609 | 637.038   | -1.439 | 0.214 | -6.710  | 1.9E-11 | 1.9751E-10 | Plekhg3  |
| ENSMUSG00000030522 | 768.520   | -1.440 | 0.199 | -7.247  | 4.3E-13 | 4.9475E-12 | Mtmr10   |
| ENSMUSG00000028463 | 251.224   | -1.441 | 0.279 | -5.170  | 2.3E-07 | 1.5999E-06 | Car9     |

|                    |           |        |       |         |         |            |               |
|--------------------|-----------|--------|-------|---------|---------|------------|---------------|
| ENSMUSG00000021646 | 378.329   | -1.441 | 0.258 | -5.580  | 2.4E-08 | 1.8452E-07 | Mccc2         |
| ENSMUSG00000024187 | 5510.531  | -1.443 | 0.110 | -13.157 | 1.6E-39 | 6.2556E-38 | Fam234a       |
| ENSMUSG00000083796 | 21.846    | -1.443 | 0.597 | -2.418  | 1.6E-02 | 0.04622595 | Gm13369       |
| ENSMUSG00000021250 | 8284.366  | -1.444 | 0.133 | -10.864 | 1.7E-27 | 4.3261E-26 | Fos           |
| ENSMUSG00000034593 | 3533.553  | -1.444 | 0.104 | -13.882 | 8.1E-44 | 3.7278E-42 | Myo5a         |
| ENSMUSG00000035246 | 78.572    | -1.445 | 0.597 | -2.421  | 1.5E-02 | 0.04590194 | Peyt1b        |
| ENSMUSG00000021376 | 119.730   | -1.445 | 0.339 | -4.260  | 2.0E-05 | 0.00010787 | Tpmt          |
| ENSMUSG00000009090 | 5841.365  | -1.445 | 0.144 | -10.070 | 7.5E-24 | 1.6425E-22 | Ap1b1         |
| ENSMUSG00000097787 | 47.564    | -1.445 | 0.551 | -2.623  | 8.7E-03 | 0.02773255 | 2700046G09Rik |
| ENSMUSG00000051319 | 689.477   | -1.446 | 0.163 | -8.872  | 7.2E-19 | 1.2189E-17 | Mtln          |
| ENSMUSG00000042684 | 931.287   | -1.447 | 0.240 | -6.018  | 1.8E-09 | 1.5183E-08 | Npl           |
| ENSMUSG00000043510 | 654.698   | -1.448 | 0.160 | -9.024  | 1.8E-19 | 3.2078E-18 | Hscb          |
| ENSMUSG00000032558 | 83.671    | -1.448 | 0.457 | -3.170  | 1.5E-03 | 0.00584711 | Nphp3         |
| ENSMUSG00000042029 | 1941.307  | -1.449 | 0.210 | -6.905  | 5.0E-12 | 5.3428E-11 | Ncapg2        |
| ENSMUSG00000036833 | 2783.216  | -1.450 | 0.115 | -12.554 | 3.8E-36 | 1.3542E-34 | Pnpla7        |
| ENSMUSG00000028199 | 260.463   | -1.450 | 0.284 | -5.114  | 3.2E-07 | 2.114E-06  | Cryz          |
| ENSMUSG00000050947 | 126.843   | -1.450 | 0.361 | -4.014  | 6.0E-05 | 0.00029464 | Amigo1        |
| ENSMUSG00000038072 | 771.716   | -1.451 | 0.188 | -7.735  | 1.0E-14 | 1.3377E-13 | Galnt11       |
| ENSMUSG00000024891 | 198.081   | -1.452 | 0.372 | -3.903  | 9.5E-05 | 0.00045197 | Slc29a2       |
| ENSMUSG00000025212 | 4120.775  | -1.453 | 0.101 | -14.394 | 5.7E-47 | 2.8606E-45 | Sfxn3         |
| ENSMUSG00000016239 | 284.087   | -1.462 | 0.281 | -5.208  | 1.9E-07 | 1.3136E-06 | Lonrf3        |
| ENSMUSG00000025578 | 220.501   | -1.463 | 0.409 | -3.577  | 3.5E-04 | 0.00150303 | Cbx8          |
| ENSMUSG00000020009 | 9723.636  | -1.466 | 0.121 | -12.119 | 8.3E-34 | 2.7389E-32 | Ifngr1        |
| ENSMUSG00000032392 | 162.315   | -1.466 | 0.354 | -4.139  | 3.5E-05 | 0.00017752 | Parp16        |
| ENSMUSG00000049791 | 114.031   | -1.466 | 0.555 | -2.644  | 8.2E-03 | 0.02629894 | Fzd4          |
| ENSMUSG00000076431 | 1602.043  | -1.470 | 0.137 | -10.751 | 5.9E-27 | 1.4532E-25 | Sox4          |
| ENSMUSG00000042549 | 273.975   | -1.471 | 0.295 | -4.982  | 6.3E-07 | 4.0481E-06 | Map2k3os      |
| ENSMUSG00000044206 | 285.988   | -1.471 | 0.360 | -4.090  | 4.3E-05 | 0.00021738 | Vsig4         |
| ENSMUSG00000025203 | 739.701   | -1.471 | 0.282 | -5.214  | 1.8E-07 | 1.2785E-06 | Scd2          |
| ENSMUSG00000085433 | 36.906    | -1.478 | 0.564 | -2.621  | 8.8E-03 | 0.02789277 | Gm16001       |
| ENSMUSG00000085882 | 278.917   | -1.480 | 0.277 | -5.343  | 9.1E-08 | 6.5512E-07 | 2610507I01Rik |
| ENSMUSG00000028414 | 235.291   | -1.480 | 0.255 | -5.809  | 6.3E-09 | 5.1298E-08 | Fktn          |
| ENSMUSG00000060098 | 1345.942  | -1.482 | 0.158 | -9.409  | 5.0E-21 | 9.6019E-20 | Prmt7         |
| ENSMUSG00000062515 | 4571.996  | -1.483 | 0.160 | -9.295  | 1.5E-20 | 2.7507E-19 | Fabp4         |
| ENSMUSG00000042389 | 504.201   | -1.485 | 0.204 | -7.287  | 3.2E-13 | 3.7368E-12 | Tsen2         |
| ENSMUSG00000109251 | 104.014   | -1.485 | 0.378 | -3.931  | 8.4E-05 | 0.00040579 | E230032D23Rik |
| ENSMUSG00000033458 | 77.389    | -1.486 | 0.599 | -2.480  | 1.3E-02 | 0.03976978 | Fan1          |
| ENSMUSG00000055013 | 1299.635  | -1.487 | 0.287 | -5.183  | 2.2E-07 | 1.4939E-06 | Agap1         |
| ENSMUSG00000040658 | 317.404   | -1.488 | 0.238 | -6.250  | 4.1E-10 | 3.7506E-09 | Dnph1         |
| ENSMUSG00000040249 | 42029.073 | -1.488 | 0.101 | -14.723 | 4.6E-49 | 2.4606E-47 | Lrp1          |
| ENSMUSG00000016552 | 291.919   | -1.488 | 0.398 | -3.737  | 1.9E-04 | 0.000845   | Foxred2       |
| ENSMUSG00000021767 | 448.262   | -1.493 | 0.237 | -6.307  | 2.8E-10 | 2.6354E-09 | Kat6b         |
| ENSMUSG00000101585 | 99.462    | -1.494 | 0.318 | -4.704  | 2.6E-06 | 1.5328E-05 | 1600010M07Rik |
| ENSMUSG00000074093 | 269.904   | -1.495 | 0.261 | -5.728  | 1.0E-08 | 8.1212E-08 | Svip          |
| ENSMUSG00000029735 | 209.137   | -1.496 | 0.341 | -4.392  | 1.1E-05 | 6.1673E-05 | Tpk1          |
| ENSMUSG00000009905 | 815.610   | -1.498 | 0.124 | -12.030 | 2.5E-33 | 8.0077E-32 | Kdsr          |
| ENSMUSG00000037151 | 369.604   | -1.501 | 0.277 | -5.412  | 6.2E-08 | 4.5557E-07 | Lrrc20        |
| ENSMUSG00000051444 | 88.189    | -1.505 | 0.463 | -3.247  | 1.2E-03 | 0.00458484 | Bbs12         |
| ENSMUSG00000097287 | 72.374    | -1.505 | 0.483 | -3.117  | 1.8E-03 | 0.00688252 | D130017N08Rik |
| ENSMUSG00000049119 | 301.831   | -1.506 | 0.319 | -4.720  | 2.4E-06 | 1.4224E-05 | Fam110b       |
| ENSMUSG00000032554 | 46462.261 | -1.507 | 0.124 | -12.114 | 8.9E-34 | 2.9082E-32 | Trf           |
| ENSMUSG00000028565 | 451.714   | -1.508 | 0.171 | -8.818  | 1.2E-18 | 1.9611E-17 | Nfia          |

|                    |           |        |       |         |         |            |               |
|--------------------|-----------|--------|-------|---------|---------|------------|---------------|
| ENSMUSG00000058325 | 849.246   | -1.509 | 0.177 | -8.541  | 1.3E-17 | 2.0944E-16 | Dock1         |
| ENSMUSG00000067629 | 20.084    | -1.510 | 0.613 | -2.464  | 1.4E-02 | 0.04135194 | Syngap1       |
| ENSMUSG00000010721 | 178.101   | -1.513 | 0.298 | -5.074  | 3.9E-07 | 2.5684E-06 | Lmbr1         |
| ENSMUSG00000041957 | 185.404   | -1.513 | 0.337 | -4.492  | 7.1E-06 | 4.0052E-05 | Pkp2          |
| ENSMUSG00000023147 | 1459.753  | -1.514 | 0.126 | -12.040 | 2.2E-33 | 7.0895E-32 | Get1          |
| ENSMUSG00000081280 | 17.541    | -1.514 | 0.602 | -2.516  | 1.2E-02 | 0.03637917 | Gm9516        |
| ENSMUSG00000028799 | 620.560   | -1.515 | 0.209 | -7.257  | 4.0E-13 | 4.6162E-12 | Zfp362        |
| ENSMUSG00000051557 | 989.338   | -1.517 | 0.170 | -8.939  | 3.9E-19 | 6.7929E-18 | Pus11         |
| ENSMUSG00000026496 | 2000.494  | -1.521 | 0.142 | -10.732 | 7.2E-27 | 1.77E-25   | Parp1         |
| ENSMUSG00000033610 | 207.731   | -1.525 | 0.308 | -4.951  | 7.4E-07 | 4.7249E-06 | Pank1         |
| ENSMUSG00000034157 | 1669.899  | -1.529 | 0.164 | -9.324  | 1.1E-20 | 2.0937E-19 | Cipc          |
| ENSMUSG00000042834 | 594.285   | -1.530 | 0.209 | -7.309  | 2.7E-13 | 3.2032E-12 | Nrep          |
| ENSMUSG00000045867 | 304.813   | -1.531 | 0.250 | -6.124  | 9.1E-10 | 8.0365E-09 | Cradd         |
| ENSMUSG00000020102 | 356.989   | -1.532 | 0.213 | -7.178  | 7.1E-13 | 8.066E-12  | Slc16a7       |
| ENSMUSG00000117061 | 23.674    | -1.533 | 0.565 | -2.714  | 6.7E-03 | 0.02196767 | Gm49958       |
| ENSMUSG00000024913 | 783.216   | -1.533 | 0.192 | -7.976  | 1.5E-15 | 2.0619E-14 | Lrp5          |
| ENSMUSG00000022091 | 599.240   | -1.534 | 0.233 | -6.586  | 4.5E-11 | 4.4407E-10 | Sorbs3        |
| ENSMUSG00000032456 | 446.767   | -1.539 | 0.270 | -5.703  | 1.2E-08 | 9.3491E-08 | Nmnat3        |
| ENSMUSG00000045817 | 7059.562  | -1.539 | 0.104 | -14.869 | 5.2E-50 | 2.8956E-48 | Zfp3612       |
| ENSMUSG00000031214 | 1191.631  | -1.541 | 0.237 | -6.516  | 7.2E-11 | 7.0118E-10 | Ophn1         |
| ENSMUSG00000024026 | 1309.792  | -1.542 | 0.103 | -14.996 | 7.8E-51 | 4.4482E-49 | Glo1          |
| ENSMUSG00000063179 | 364.263   | -1.543 | 0.248 | -6.220  | 5.0E-10 | 4.4786E-09 | Pstk          |
| ENSMUSG00000038740 | 620.739   | -1.544 | 0.178 | -8.670  | 4.3E-18 | 7.0377E-17 | Mvb12b        |
| ENSMUSG00000057541 | 743.579   | -1.545 | 0.179 | -8.616  | 6.9E-18 | 1.1095E-16 | Pus7          |
| ENSMUSG00000021185 | 1166.426  | -1.546 | 0.226 | -6.854  | 7.2E-12 | 7.5256E-11 | Dglucy        |
| ENSMUSG00000074622 | 15591.429 | -1.548 | 0.132 | -11.771 | 5.5E-32 | 1.6764E-30 | Mafb          |
| ENSMUSG00000028082 | 317.748   | -1.550 | 0.228 | -6.802  | 1.0E-11 | 1.0703E-10 | Sh3d19        |
| ENSMUSG00000113361 | 72.880    | -1.551 | 0.371 | -4.176  | 3.0E-05 | 0.00015256 | B930059L03Rik |
| ENSMUSG00000022972 | 106.945   | -1.551 | 0.364 | -4.263  | 2.0E-05 | 0.00010637 | Cfap298       |
| ENSMUSG00000059994 | 692.865   | -1.552 | 0.240 | -6.459  | 1.1E-10 | 1.0082E-09 | Fcrl1         |
| ENSMUSG00000030844 | 3556.553  | -1.553 | 0.127 | -12.235 | 2.0E-34 | 6.8012E-33 | Rgs10         |
| ENSMUSG00000069184 | 114.240   | -1.554 | 0.488 | -3.181  | 1.5E-03 | 0.00563759 | Zfp72         |
| ENSMUSG00000047434 | 669.501   | -1.554 | 0.178 | -8.742  | 2.3E-18 | 3.7917E-17 | Xxylt1        |
| ENSMUSG00000049086 | 93.519    | -1.554 | 0.338 | -4.601  | 4.2E-06 | 2.4546E-05 | Bmyc          |
| ENSMUSG00000075297 | 34.506    | -1.555 | 0.589 | -2.639  | 8.3E-03 | 0.02664847 | H60b          |
| ENSMUSG00000003812 | 4278.130  | -1.556 | 0.141 | -11.057 | 2.0E-28 | 5.3563E-27 | Dnase2a       |
| ENSMUSG00000097039 | 486.718   | -1.559 | 0.224 | -6.945  | 3.8E-12 | 4.0759E-11 | Pvt1          |
| ENSMUSG00000003559 | 424.319   | -1.561 | 0.263 | -5.933  | 3.0E-09 | 2.5059E-08 | As3mt         |
| ENSMUSG00000073434 | 141.890   | -1.562 | 0.481 | -3.250  | 1.2E-03 | 0.00453513 | Wdr90         |
| ENSMUSG00000117444 | 49.460    | -1.564 | 0.417 | -3.755  | 1.7E-04 | 0.00079316 | Gm50020       |
| ENSMUSG00000020553 | 1366.661  | -1.571 | 0.155 | -10.166 | 2.8E-24 | 6.303E-23  | Pctp          |
| ENSMUSG00000019718 | 80.916    | -1.573 | 0.502 | -3.130  | 1.7E-03 | 0.00660805 | L3hypdh       |
| ENSMUSG00000035284 | 453.995   | -1.573 | 0.246 | -6.392  | 1.6E-10 | 1.5463E-09 | Vps13c        |
| ENSMUSG00000044408 | 3296.754  | -1.573 | 0.085 | -18.507 | 1.8E-76 | 1.9523E-74 | Sptssa        |
| ENSMUSG00000030117 | 2877.486  | -1.578 | 0.361 | -4.375  | 1.2E-05 | 6.6299E-05 | Gdf3          |
| ENSMUSG00000059401 | 190.386   | -1.580 | 0.381 | -4.150  | 3.3E-05 | 0.00016944 | Maml1d1       |
| ENSMUSG00000098176 | 334.268   | -1.580 | 0.409 | -3.865  | 1.1E-04 | 0.00052451 | Ccdc166       |
| ENSMUSG00000020629 | 1318.399  | -1.582 | 0.182 | -8.681  | 3.9E-18 | 6.3773E-17 | Adi1          |
| ENSMUSG00000057176 | 79.732    | -1.583 | 0.445 | -3.560  | 3.7E-04 | 0.00159436 | Ccdc189       |
| ENSMUSG00000015468 | 91.681    | -1.585 | 0.542 | -2.924  | 3.5E-03 | 0.01227293 | Notch4        |
| ENSMUSG00000084964 | 80.512    | -1.586 | 0.575 | -2.756  | 5.8E-03 | 0.01957277 | Gm15503       |
| ENSMUSG00000020263 | 1497.326  | -1.588 | 0.139 | -11.429 | 3.0E-30 | 8.5624E-29 | Appl2         |



|                    |          |        |       |         |         |            |               |
|--------------------|----------|--------|-------|---------|---------|------------|---------------|
| ENSMUSG00000020741 | 1904.041 | -1.589 | 0.112 | -14.139 | 2.2E-45 | 1.0459E-43 | Cluh          |
| ENSMUSG00000087362 | 114.437  | -1.592 | 0.481 | -3.306  | 9.5E-04 | 0.00376705 | Gm13710       |
| ENSMUSG00000086712 | 93.124   | -1.592 | 0.620 | -2.567  | 1.0E-02 | 0.03194183 | Mexis         |
| ENSMUSG00000053559 | 1464.948 | -1.594 | 0.261 | -6.102  | 1.0E-09 | 9.1975E-09 | Smaggp        |
| ENSMUSG00000030761 | 1616.401 | -1.595 | 0.164 | -9.737  | 2.1E-22 | 4.282E-21  | Myo7a         |
| ENSMUSG00000030872 | 1751.903 | -1.596 | 0.141 | -11.339 | 8.4E-30 | 2.3553E-28 | Gga2          |
| ENSMUSG00000097313 | 109.341  | -1.597 | 0.392 | -4.072  | 4.7E-05 | 0.00023365 | Gm26569       |
| ENSMUSG00000030725 | 346.469  | -1.600 | 0.260 | -6.148  | 7.8E-10 | 6.9778E-09 | Lipt2         |
| ENSMUSG00000022389 | 782.616  | -1.603 | 0.225 | -7.118  | 1.1E-12 | 1.2255E-11 | Tef           |
| ENSMUSG00000007613 | 2163.787 | -1.606 | 0.152 | -10.538 | 5.7E-26 | 1.3629E-24 | Tgfb1         |
| ENSMUSG00000028864 | 254.750  | -1.608 | 0.280 | -5.740  | 9.5E-09 | 7.5824E-08 | Hgf           |
| ENSMUSG00000002871 | 4735.336 | -1.608 | 0.104 | -15.439 | 8.9E-54 | 5.4886E-52 | Tpra1         |
| ENSMUSG00000113626 | 36.132   | -1.611 | 0.557 | -2.892  | 3.8E-03 | 0.01341689 | Gm7240        |
| ENSMUSG00000037709 | 54.474   | -1.611 | 0.596 | -2.703  | 6.9E-03 | 0.02257625 | Fam13a        |
| ENSMUSG00000097994 | 198.129  | -1.612 | 0.239 | -6.738  | 1.6E-11 | 1.6352E-10 | Gm26982       |
| ENSMUSG00000035891 | 6673.669 | -1.615 | 0.103 | -15.657 | 3.0E-55 | 1.9425E-53 | Cerk          |
| ENSMUSG00000040003 | 36.517   | -1.615 | 0.640 | -2.525  | 1.2E-02 | 0.03560256 | Magi2         |
| ENSMUSG00000109378 | 15.027   | -1.621 | 0.608 | -2.664  | 7.7E-03 | 0.02492803 | Gm49396       |
| ENSMUSG00000004798 | 927.827  | -1.621 | 0.164 | -9.866  | 5.8E-23 | 1.2289E-21 | Ulk2          |
| ENSMUSG00000021483 | 3140.840 | -1.622 | 0.177 | -9.168  | 4.8E-20 | 8.7732E-19 | Cdk20         |
| ENSMUSG00000006675 | 60.896   | -1.623 | 0.557 | -2.914  | 3.6E-03 | 0.01260587 | P4htm         |
| ENSMUSG00000038370 | 432.019  | -1.626 | 0.296 | -5.501  | 3.8E-08 | 2.8387E-07 | Pcp411        |
| ENSMUSG00000021690 | 261.854  | -1.627 | 0.322 | -5.054  | 4.3E-07 | 2.8338E-06 | Jmy           |
| ENSMUSG00000084918 | 52.274   | -1.630 | 0.531 | -3.072  | 2.1E-03 | 0.00789743 | Gm12708       |
| ENSMUSG00000031431 | 2773.002 | -1.630 | 0.144 | -11.344 | 7.9E-30 | 2.2179E-28 | Tsc22d3       |
| ENSMUSG00000025732 | 444.605  | -1.630 | 0.217 | -7.527  | 5.2E-14 | 6.4425E-13 | Mcrip2        |
| ENSMUSG00000041845 | 274.341  | -1.631 | 0.242 | -6.727  | 1.7E-11 | 1.7661E-10 | Rhod          |
| ENSMUSG00000028621 | 191.538  | -1.632 | 0.289 | -5.653  | 1.6E-08 | 1.2287E-07 | Cyb5rl        |
| ENSMUSG00000032010 | 507.636  | -1.633 | 0.255 | -6.404  | 1.5E-10 | 1.4369E-09 | Usp2          |
| ENSMUSG00000034487 | 422.156  | -1.634 | 0.290 | -5.640  | 1.7E-08 | 1.3273E-07 | Poglut3       |
| ENSMUSG00000032898 | 586.496  | -1.635 | 0.257 | -6.356  | 2.1E-10 | 1.9497E-09 | Fbxo21        |
| ENSMUSG00000005800 | 9310.370 | -1.637 | 0.173 | -9.441  | 3.7E-21 | 7.1391E-20 | Mmp8          |
| ENSMUSG00000030207 | 548.353  | -1.637 | 0.170 | -9.633  | 5.8E-22 | 1.1616E-20 | Fam234b       |
| ENSMUSG00000021773 | 213.962  | -1.638 | 0.241 | -6.792  | 1.1E-11 | 1.1395E-10 | Comtd1        |
| ENSMUSG00000038422 | 171.128  | -1.639 | 0.383 | -4.278  | 1.9E-05 | 0.0001001  | Hdhd3         |
| ENSMUSG00000096988 | 59.973   | -1.641 | 0.648 | -2.530  | 1.1E-02 | 0.03517387 | A930029G22Rik |
| ENSMUSG00000026207 | 599.658  | -1.641 | 0.220 | -7.469  | 8.1E-14 | 9.9231E-13 | Speg          |
| ENSMUSG00000041975 | 253.896  | -1.641 | 0.330 | -4.981  | 6.3E-07 | 4.0648E-06 | Mettl8        |
| ENSMUSG00000038886 | 564.444  | -1.644 | 0.275 | -5.982  | 2.2E-09 | 1.8742E-08 | Man2a2        |
| ENSMUSG00000047205 | 88.336   | -1.644 | 0.437 | -3.766  | 1.7E-04 | 0.00076087 | Dusp18        |
| ENSMUSG00000028093 | 1011.753 | -1.647 | 0.204 | -8.089  | 6.0E-16 | 8.4913E-15 | Acp6          |
| ENSMUSG00000109715 | 211.814  | -1.650 | 0.299 | -5.526  | 3.3E-08 | 2.4788E-07 | Gm45606       |
| ENSMUSG00000024381 | 7390.203 | -1.650 | 0.119 | -13.895 | 6.8E-44 | 3.1328E-42 | Bin1          |
| ENSMUSG00000053617 | 245.382  | -1.651 | 0.276 | -5.980  | 2.2E-09 | 1.8981E-08 | Sh3pxd2a      |
| ENSMUSG00000032750 | 608.622  | -1.654 | 0.283 | -5.837  | 5.3E-09 | 4.3807E-08 | Gab3          |
| ENSMUSG00000004187 | 46.472   | -1.659 | 0.493 | -3.367  | 7.6E-04 | 0.0030827  | Kifc2         |
| ENSMUSG00000062373 | 3695.470 | -1.659 | 0.120 | -13.869 | 9.8E-44 | 4.4763E-42 | Tmem65        |
| ENSMUSG00000037664 | 107.101  | -1.660 | 0.439 | -3.783  | 1.6E-04 | 0.00071479 | Cdkn1c        |
| ENSMUSG00000114045 | 181.594  | -1.662 | 0.324 | -5.129  | 2.9E-07 | 1.9666E-06 | Gm34220       |
| ENSMUSG00000083679 | 43.102   | -1.662 | 0.390 | -4.260  | 2.0E-05 | 0.00010783 | Gm12892       |
| ENSMUSG00000041921 | 646.417  | -1.662 | 0.191 | -8.705  | 3.2E-18 | 5.1941E-17 | Metap1d       |
| ENSMUSG00000116995 | 67.797   | -1.666 | 0.423 | -3.941  | 8.1E-05 | 0.00039108 | Gm21926       |

|                     |            |        |       |         |         |            |               |
|---------------------|------------|--------|-------|---------|---------|------------|---------------|
| ENSMUSG00000106825  | 62.471     | -1.667 | 0.551 | -3.026  | 2.5E-03 | 0.00907224 | 2510016D11Rik |
| ENSMUSG00000055912  | 515.555    | -1.667 | 0.189 | -8.838  | 9.7E-19 | 1.6449E-17 | Tmem150a      |
| ENSMUSG00000069255  | 954.231    | -1.667 | 0.196 | -8.519  | 1.6E-17 | 2.5226E-16 | Dusp22        |
| ENSMUSG00000086657  | 71.472     | -1.667 | 0.383 | -4.351  | 1.4E-05 | 7.3659E-05 | Stamos        |
| ENSMUSG00000027984  | 1593.542   | -1.671 | 0.118 | -14.184 | 1.1E-45 | 5.5802E-44 | Hadh          |
| ENSMUSG00000070225  | 60.428     | -1.672 | 0.452 | -3.700  | 2.2E-04 | 0.00096871 | n-R5s33       |
| ENSMUSG00000057315  | 956.916    | -1.672 | 0.208 | -8.053  | 8.1E-16 | 1.1296E-14 | Arhgap24      |
| ENSMUSG00000025986  | 1268.682   | -1.673 | 0.162 | -10.338 | 4.8E-25 | 1.0895E-23 | Slc39a10      |
| ENSMUSG00000021476  | 849.608    | -1.674 | 0.240 | -6.977  | 3.0E-12 | 3.2773E-11 | Habp4         |
| ENSMUSG00000007891  | 220403.050 | -1.675 | 0.102 | -16.362 | 3.6E-60 | 2.6571E-58 | Ctsd          |
| ENSMUSG00000042595  | 267.753    | -1.675 | 0.306 | -5.478  | 4.3E-08 | 3.2007E-07 | Fam199x       |
| ENSMUSG00000024247  | 49.849     | -1.677 | 0.516 | -3.252  | 1.1E-03 | 0.00450702 | Pkdcc         |
| ENSMUSG00000034641  | 4675.841   | -1.680 | 0.124 | -13.568 | 6.2E-42 | 2.7102E-40 | Cd300ld       |
| ENSMUSG00000006395  | 618.758    | -1.680 | 0.157 | -10.686 | 1.2E-26 | 2.8783E-25 | Hyi           |
| ENSMUSG00000049285  | 419.147    | -1.681 | 0.284 | -5.914  | 3.3E-09 | 2.7991E-08 | Mblac1        |
| ENSMUSG00000055322  | 573.329    | -1.682 | 0.189 | -8.886  | 6.3E-19 | 1.0816E-17 | Tns1          |
| ENSMUSG00000018428  | 502.060    | -1.682 | 0.238 | -7.076  | 1.5E-12 | 1.6457E-11 | Akap1         |
| ENSMUSG00000032350  | 3644.629   | -1.682 | 0.164 | -10.245 | 1.2E-24 | 2.8277E-23 | Gclc          |
| ENSMUSG00000020377  | 104.392    | -1.683 | 0.332 | -5.064  | 4.1E-07 | 2.7039E-06 | Ltc4s         |
| ENSMUSG00000051331  | 56.128     | -1.684 | 0.556 | -3.032  | 2.4E-03 | 0.00892113 | Cacna1c       |
| ENSMUSG00000018217  | 8115.800   | -1.685 | 0.120 | -13.998 | 1.6E-44 | 7.5449E-43 | Pmp22         |
| ENSMUSG00000038523  | 56.411     | -1.691 | 0.588 | -2.876  | 4.0E-03 | 0.01405009 | 1700003F12Rik |
| ENSMUSG00000010307  | 6331.824   | -1.693 | 0.150 | -11.304 | 1.3E-29 | 3.4983E-28 | Tmem86a       |
| ENSMUSG00000030671  | 325.014    | -1.694 | 0.305 | -5.556  | 2.8E-08 | 2.1073E-07 | Pde3b         |
| ENSMUSG00000020032  | 163.466    | -1.697 | 0.390 | -4.353  | 1.3E-05 | 7.2929E-05 | Nuak1         |
| ENSMUSG000000114172 | 37.094     | -1.701 | 0.586 | -2.903  | 3.7E-03 | 0.01299408 | Gm36298       |
| ENSMUSG00000037243  | 353.989    | -1.703 | 0.234 | -7.288  | 3.1E-13 | 3.6983E-12 | Zfp692        |
| ENSMUSG00000032076  | 1305.443   | -1.704 | 0.182 | -9.338  | 9.8E-21 | 1.84E-19   | Cadm1         |
| ENSMUSG00000003518  | 10602.065  | -1.706 | 0.086 | -19.891 | 4.9E-88 | 6.9761E-86 | Dusp3         |
| ENSMUSG000000100280 | 47.265     | -1.709 | 0.405 | -4.222  | 2.4E-05 | 0.00012642 | Gm28417       |
| ENSMUSG00000037235  | 1385.449   | -1.709 | 0.182 | -9.409  | 5.0E-21 | 9.6019E-20 | Mxd4          |
| ENSMUSG00000027187  | 17803.675  | -1.712 | 0.160 | -10.705 | 9.6E-27 | 2.3536E-25 | Cat           |
| ENSMUSG00000097223  | 33.323     | -1.717 | 0.595 | -2.884  | 3.9E-03 | 0.01372563 | Gm2449        |
| ENSMUSG00000078861  | 114.610    | -1.718 | 0.297 | -5.787  | 7.2E-09 | 5.8079E-08 | Zfp931        |
| ENSMUSG00000059839  | 99.195     | -1.718 | 0.326 | -5.266  | 1.4E-07 | 9.8258E-07 | Zfp874b       |
| ENSMUSG00000045312  | 4250.021   | -1.720 | 0.201 | -8.563  | 1.1E-17 | 1.7529E-16 | Lhfp12        |
| ENSMUSG00000039485  | 54.449     | -1.720 | 0.564 | -3.051  | 2.3E-03 | 0.00842382 | Tspyl4        |
| ENSMUSG00000039763  | 88.723     | -1.721 | 0.572 | -3.007  | 2.6E-03 | 0.00962121 | Dnajc28       |
| ENSMUSG000000104351 | 42.106     | -1.721 | 0.615 | -2.800  | 5.1E-03 | 0.01739251 | Gm37125       |
| ENSMUSG00000025602  | 129.223    | -1.722 | 0.488 | -3.530  | 4.2E-04 | 0.00177044 | Zfp202        |
| ENSMUSG00000022303  | 271.879    | -1.727 | 0.406 | -4.251  | 2.1E-05 | 0.00011203 | Destamp       |
| ENSMUSG00000039633  | 206.521    | -1.729 | 0.350 | -4.941  | 7.8E-07 | 4.9517E-06 | Lonrf1        |
| ENSMUSG00000032606  | 281.521    | -1.730 | 0.367 | -4.707  | 2.5E-06 | 1.513E-05  | Nien1         |
| ENSMUSG00000022797  | 3690.078   | -1.730 | 0.128 | -13.473 | 2.2E-41 | 9.6002E-40 | Tfrc          |
| ENSMUSG00000021947  | 707.788    | -1.731 | 0.206 | -8.413  | 4.0E-17 | 6.0798E-16 | Cry11         |
| ENSMUSG000000114501 | 316.292    | -1.733 | 0.306 | -5.672  | 1.4E-08 | 1.1088E-07 | Gm48582       |
| ENSMUSG00000026687  | 5144.653   | -1.733 | 0.123 | -14.137 | 2.2E-45 | 1.0799E-43 | Aldh9a1       |
| ENSMUSG00000000266  | 32.165     | -1.735 | 0.649 | -2.675  | 7.5E-03 | 0.02424268 | Mid2          |
| ENSMUSG00000031142  | 120.231    | -1.735 | 0.420 | -4.135  | 3.6E-05 | 0.00018038 | Cacna1f       |
| ENSMUSG00000031903  | 5570.185   | -1.736 | 0.119 | -14.644 | 1.5E-48 | 7.7561E-47 | Pla2g15       |
| ENSMUSG00000046329  | 83.487     | -1.741 | 0.407 | -4.282  | 1.9E-05 | 9.8609E-05 | Slc25a23      |
| ENSMUSG00000092060  | 334.600    | -1.742 | 0.316 | -5.507  | 3.6E-08 | 2.7393E-07 | Bend4         |

|                    |           |        |       |         |          |            |               |
|--------------------|-----------|--------|-------|---------|----------|------------|---------------|
| ENSMUSG00000101655 | 76.772    | -1.745 | 0.464 | -3.763  | 1.7E-04  | 0.00077039 | 2310040G24Rik |
| ENSMUSG00000030946 | 460.562   | -1.745 | 0.254 | -6.878  | 6.1E-12  | 6.4199E-11 | Lhpp          |
| ENSMUSG00000006575 | 74.331    | -1.745 | 0.504 | -3.466  | 5.3E-04  | 0.00220792 | Rundc3a       |
| ENSMUSG00000034800 | 127.408   | -1.746 | 0.488 | -3.581  | 3.4E-04  | 0.00148456 | Zfp661        |
| ENSMUSG00000072596 | 414.387   | -1.747 | 0.251 | -6.965  | 3.3E-12  | 3.5598E-11 | Ear2          |
| ENSMUSG00000073433 | 46.077    | -1.749 | 0.642 | -2.724  | 6.5E-03  | 0.02136821 | Arhgdig       |
| ENSMUSG00000021482 | 1322.100  | -1.750 | 0.142 | -12.289 | 1.0E-34  | 3.5292E-33 | Prxl2c        |
| ENSMUSG00000017400 | 62.555    | -1.751 | 0.596 | -2.938  | 3.3E-03  | 0.01178036 | Stac2         |
| ENSMUSG00000025466 | 171.531   | -1.752 | 0.272 | -6.431  | 1.3E-10  | 1.2081E-09 | Fuom          |
| ENSMUSG00000018995 | 335.164   | -1.753 | 0.224 | -7.830  | 4.9E-15  | 6.4383E-14 | Nars2         |
| ENSMUSG00000058454 | 1118.517  | -1.753 | 0.154 | -11.381 | 5.2E-30  | 1.472E-28  | Dhcr7         |
| ENSMUSG00000029122 | 59.820    | -1.756 | 0.724 | -2.427  | 1.5E-02  | 0.04534314 | Evc           |
| ENSMUSG00000042476 | 189.452   | -1.757 | 0.378 | -4.642  | 3.4E-06  | 2.0381E-05 | Abcb4         |
| ENSMUSG00000017493 | 8966.109  | -1.757 | 0.165 | -10.617 | 2.5E-26  | 5.9904E-25 | Igfbp4        |
| ENSMUSG00000044229 | 241.718   | -1.761 | 0.343 | -5.128  | 2.9E-07  | 1.9702E-06 | Nxpe4         |
| ENSMUSG00000039670 | 269.987   | -1.762 | 0.281 | -6.278  | 3.4E-10  | 3.1544E-09 | Oxld1         |
| ENSMUSG00000033249 | 69.828    | -1.766 | 0.438 | -4.030  | 5.6E-05  | 0.00027675 | Hsf4          |
| ENSMUSG00000024962 | 1210.115  | -1.766 | 0.191 | -9.236  | 2.6E-20  | 4.7095E-19 | Vegfb         |
| ENSMUSG00000013089 | 2267.266  | -1.767 | 0.222 | -7.953  | 1.8E-15  | 2.4675E-14 | Etv5          |
| ENSMUSG00000043157 | 2528.281  | -1.771 | 0.218 | -8.115  | 4.8E-16  | 6.885E-15  | Arl11         |
| ENSMUSG00000035064 | 451.826   | -1.772 | 0.213 | -8.312  | 9.4E-17  | 1.4006E-15 | Eef2k         |
| ENSMUSG00000060275 | 19.938    | -1.774 | 0.575 | -3.083  | 2.0E-03  | 0.00764133 | Nrg2          |
| ENSMUSG00000070390 | 77.103    | -1.776 | 0.446 | -3.983  | 6.8E-05  | 0.00033252 | Nlrp1b        |
| ENSMUSG00000032741 | 590.039   | -1.777 | 0.226 | -7.853  | 4.0E-15  | 5.3939E-14 | Tpcn1         |
| ENSMUSG00000023992 | 19681.133 | -1.778 | 0.096 | -18.606 | 2.9E-77  | 3.1818E-75 | Trem2         |
| ENSMUSG00000006378 | 37.607    | -1.779 | 0.479 | -3.715  | 2.0E-04  | 0.00091562 | Gcat          |
| ENSMUSG00000007379 | 133.245   | -1.782 | 0.575 | -3.100  | 1.9E-03  | 0.00725313 | Dennd2c       |
| ENSMUSG00000044026 | 131.409   | -1.783 | 0.452 | -3.946  | 7.9E-05  | 0.00038325 | Slc35g1       |
| ENSMUSG00000100826 | 35.632    | -1.783 | 0.660 | -2.700  | 6.9E-03  | 0.02276279 | Snhg14        |
| ENSMUSG00000031383 | 106.487   | -1.784 | 0.572 | -3.117  | 1.8E-03  | 0.00687833 | Dusp9         |
| ENSMUSG00000057286 | 40.877    | -1.785 | 0.686 | -2.601  | 9.3E-03  | 0.02933515 | St6galnac2    |
| ENSMUSG00000031367 | 1808.410  | -1.787 | 0.122 | -14.635 | 1.7E-48  | 8.8242E-47 | Ap1s2         |
| ENSMUSG00000006717 | 948.438   | -1.787 | 0.140 | -12.746 | 3.3E-37  | 1.2239E-35 | Acot13        |
| ENSMUSG00000022802 | 75.094    | -1.787 | 0.718 | -2.489  | 1.3E-02  | 0.03891964 | Lmln          |
| ENSMUSG00000060600 | 338.068   | -1.788 | 0.269 | -6.650  | 2.9E-11  | 2.9313E-10 | Eno3          |
| ENSMUSG00000019302 | 6311.874  | -1.789 | 0.102 | -17.513 | 1.1E-68  | 1.0799E-66 | Atp6v0a1      |
| ENSMUSG00000111080 | 186.250   | -1.789 | 0.268 | -6.685  | 2.3E-11  | 2.3367E-10 | Gm20300       |
| ENSMUSG00000057706 | 113.292   | -1.790 | 0.459 | -3.898  | 9.7E-05  | 0.0004609  | Mex3b         |
| ENSMUSG00000041625 | 70.507    | -1.799 | 0.501 | -3.589  | 3.3E-04  | 0.00144404 | Ggact         |
| ENSMUSG00000038967 | 425.365   | -1.802 | 0.415 | -4.338  | 1.4E-05  | 7.7613E-05 | Pdk2          |
| ENSMUSG00000043419 | 141.246   | -1.802 | 0.496 | -3.637  | 2.8E-04  | 0.00122021 | Rnf227        |
| ENSMUSG00000083677 | 64.670    | -1.806 | 0.425 | -4.251  | 2.1E-05  | 0.00011202 | Gm11699       |
| ENSMUSG00000042073 | 137.047   | -1.808 | 0.302 | -5.986  | 2.2E-09  | 1.8385E-08 | Abhd14b       |
| ENSMUSG00000022265 | 2052.595  | -1.810 | 0.149 | -12.172 | 4.4E-34  | 1.4532E-32 | Ank           |
| ENSMUSG00000056069 | 6407.981  | -1.813 | 0.094 | -19.350 | 2.1E-83  | 2.5348E-81 | Otulin1       |
| ENSMUSG00000034652 | 11323.722 | -1.813 | 0.080 | -22.568 | 8.9E-113 | 2.16E-110  | Cd300a        |
| ENSMUSG00000041695 | 180.288   | -1.816 | 0.347 | -5.239  | 1.6E-07  | 1.122E-06  | Kcnj2         |
| ENSMUSG00000026098 | 187.663   | -1.819 | 0.345 | -5.279  | 1.3E-07  | 9.1588E-07 | Pms1          |
| ENSMUSG00000039873 | 244.864   | -1.824 | 0.272 | -6.699  | 2.1E-11  | 2.1257E-10 | Neurl2        |
| ENSMUSG00000066894 | 74.619    | -1.825 | 0.577 | -3.160  | 1.6E-03  | 0.00601566 | Vsig10        |
| ENSMUSG00000031791 | 223.108   | -1.826 | 0.307 | -5.956  | 2.6E-09  | 2.1868E-08 | Tmem38a       |
| ENSMUSG00000018927 | 52162.599 | -1.829 | 0.153 | -11.925 | 8.7E-33  | 2.7622E-31 | Ccl6          |

|                    |           |        |       |         |         |            |               |
|--------------------|-----------|--------|-------|---------|---------|------------|---------------|
| ENSMUSG00000025577 | 90.646    | -1.836 | 0.507 | -3.618  | 3.0E-04 | 0.0013024  | Cbx2          |
| ENSMUSG00000070323 | 446.052   | -1.836 | 0.322 | -5.697  | 1.2E-08 | 9.6324E-08 | Mmp27         |
| ENSMUSG00000089762 | 82.161    | -1.840 | 0.509 | -3.618  | 3.0E-04 | 0.00130225 | Ier51         |
| ENSMUSG00000014158 | 530.384   | -1.841 | 0.339 | -5.436  | 5.5E-08 | 4.0209E-07 | Trpv4         |
| ENSMUSG00000028088 | 253.704   | -1.841 | 0.247 | -7.452  | 9.2E-14 | 1.1244E-12 | Fmo5          |
| ENSMUSG00000045404 | 3532.156  | -1.847 | 0.142 | -13.015 | 1.0E-38 | 3.9701E-37 | Kcnk13        |
| ENSMUSG00000039031 | 1169.345  | -1.847 | 0.227 | -8.147  | 3.7E-16 | 5.3459E-15 | Arhgap18      |
| ENSMUSG00000066191 | 66.972    | -1.850 | 0.684 | -2.705  | 6.8E-03 | 0.022421   | Anks6         |
| ENSMUSG00000025795 | 1585.990  | -1.852 | 0.169 | -10.965 | 5.6E-28 | 1.4624E-26 | Rassf3        |
| ENSMUSG00000074361 | 715.443   | -1.853 | 0.205 | -9.031  | 1.7E-19 | 3.0077E-18 | C5ar2         |
| ENSMUSG00000030584 | 41.981    | -1.854 | 0.715 | -2.592  | 9.5E-03 | 0.02999984 | Dpfl          |
| ENSMUSG00000041429 | 193.451   | -1.855 | 0.406 | -4.564  | 5.0E-06 | 2.8886E-05 | Nthl1         |
| ENSMUSG00000022817 | 14075.136 | -1.856 | 0.215 | -8.613  | 7.1E-18 | 1.1398E-16 | Itgb5         |
| ENSMUSG00000061046 | 703.496   | -1.859 | 0.149 | -12.486 | 8.9E-36 | 3.1497E-34 | Haghl         |
| ENSMUSG00000050174 | 55.359    | -1.860 | 0.406 | -4.582  | 4.6E-06 | 2.6719E-05 | Nudt6         |
| ENSMUSG00000087658 | 149.591   | -1.862 | 0.318 | -5.851  | 4.9E-09 | 4.026E-08  | Hotairm1      |
| ENSMUSG00000054723 | 343.899   | -1.864 | 0.252 | -7.402  | 1.3E-13 | 1.6264E-12 | Vmac          |
| ENSMUSG00000033170 | 60.304    | -1.865 | 0.635 | -2.936  | 3.3E-03 | 0.01183873 | Card10        |
| ENSMUSG00000026208 | 114.816   | -1.865 | 0.478 | -3.904  | 9.5E-05 | 0.00045117 | Des           |
| ENSMUSG00000006641 | 220.613   | -1.869 | 0.463 | -4.041  | 5.3E-05 | 0.0002645  | Slc5a6        |
| ENSMUSG00000079293 | 9458.320  | -1.874 | 0.110 | -17.060 | 2.9E-65 | 2.5515E-63 | Clec7a        |
| ENSMUSG00000048489 | 54.351    | -1.879 | 0.520 | -3.612  | 3.0E-04 | 0.00132551 | Depp1         |
| ENSMUSG00000049866 | 6368.438  | -1.880 | 0.155 | -12.118 | 8.5E-34 | 2.7928E-32 | Arl4c         |
| ENSMUSG00000000686 | 223.420   | -1.881 | 0.385 | -4.886  | 1.0E-06 | 6.4728E-06 | Abhd15        |
| ENSMUSG00000048058 | 565.140   | -1.884 | 0.284 | -6.643  | 3.1E-11 | 3.0688E-10 | Ldlrad3       |
| ENSMUSG00000021514 | 254.341   | -1.890 | 0.280 | -6.747  | 1.5E-11 | 1.5367E-10 | Zfp369        |
| ENSMUSG00000103247 | 15.455    | -1.890 | 0.712 | -2.655  | 7.9E-03 | 0.02558741 | Gm38091       |
| ENSMUSG00000020381 | 29.140    | -1.890 | 0.639 | -2.956  | 3.1E-03 | 0.01116728 | Mrnip         |
| ENSMUSG00000038742 | 65.875    | -1.890 | 0.506 | -3.734  | 1.9E-04 | 0.00085538 | Angptl6       |
| ENSMUSG00000026458 | 336.545   | -1.891 | 0.322 | -5.865  | 4.5E-09 | 3.7252E-08 | Ppfi4         |
| ENSMUSG00000073427 | 34.643    | -1.892 | 0.529 | -3.581  | 3.4E-04 | 0.00148456 | Gm4924        |
| ENSMUSG00000045333 | 118.210   | -1.893 | 0.478 | -3.960  | 7.5E-05 | 0.00036373 | Zfp423        |
| ENSMUSG00000035960 | 339.680   | -1.897 | 0.278 | -6.835  | 8.2E-12 | 8.5755E-11 | Apex1         |
| ENSMUSG00000027544 | 473.164   | -1.901 | 0.480 | -3.959  | 7.5E-05 | 0.00036473 | Nfatc2        |
| ENSMUSG00000025464 | 606.702   | -1.901 | 0.200 | -9.516  | 1.8E-21 | 3.515E-20  | Paox          |
| ENSMUSG00000054708 | 261.327   | -1.908 | 0.248 | -7.681  | 1.6E-14 | 2.0172E-13 | Ankrd24       |
| ENSMUSG00000024177 | 758.050   | -1.909 | 0.243 | -7.860  | 3.8E-15 | 5.1154E-14 | Nme4          |
| ENSMUSG00000019876 | 2197.776  | -1.911 | 0.185 | -10.320 | 5.7E-25 | 1.3096E-23 | Pkib          |
| ENSMUSG00000026730 | 230.082   | -1.911 | 0.367 | -5.208  | 1.9E-07 | 1.3137E-06 | Pter          |
| ENSMUSG00000074213 | 34.663    | -1.920 | 0.522 | -3.681  | 2.3E-04 | 0.00103734 | Gm10642       |
| ENSMUSG00000086938 | 67.884    | -1.921 | 0.551 | -3.484  | 4.9E-04 | 0.0020706  | 4930481A15Rik |
| ENSMUSG00000034416 | 59.368    | -1.924 | 0.588 | -3.270  | 1.1E-03 | 0.00424341 | Pkd112        |
| ENSMUSG00000024535 | 1422.618  | -1.926 | 0.179 | -10.774 | 4.6E-27 | 1.1415E-25 | Snx24         |
| ENSMUSG00000030201 | 1811.562  | -1.926 | 0.144 | -13.367 | 9.4E-41 | 3.9642E-39 | Lrp6          |
| ENSMUSG00000029919 | 4536.056  | -1.928 | 0.103 | -18.703 | 4.7E-78 | 5.3065E-76 | Hpgds         |
| ENSMUSG00000021559 | 2129.307  | -1.931 | 0.131 | -14.762 | 2.6E-49 | 1.4079E-47 | Dapk1         |
| ENSMUSG00000030309 | 75.118    | -1.933 | 0.559 | -3.460  | 5.4E-04 | 0.00225223 | Caprin2       |
| ENSMUSG00000030256 | 2396.305  | -1.935 | 0.157 | -12.357 | 4.4E-35 | 1.5225E-33 | Bhlhe41       |
| ENSMUSG00000030259 | 206.721   | -1.938 | 0.434 | -4.467  | 7.9E-06 | 4.4587E-05 | Rassf8        |
| ENSMUSG00000060224 | 172.522   | -1.939 | 0.429 | -4.516  | 6.3E-06 | 3.5993E-05 | Pyroxd2       |
| ENSMUSG00000109675 | 193.625   | -1.940 | 0.371 | -5.233  | 1.7E-07 | 1.1602E-06 | Nxpe1-ps      |
| ENSMUSG00000050538 | 45.580    | -1.943 | 0.434 | -4.477  | 7.6E-06 | 4.2678E-05 | B230217C12Rik |

|                    |           |        |       |         |          |            |               |
|--------------------|-----------|--------|-------|---------|----------|------------|---------------|
| ENSMUSG00000097101 | 85.764    | -1.943 | 0.536 | -3.623  | 2.9E-04  | 0.00127813 | 1810034E14Rik |
| ENSMUSG00000031377 | 70.838    | -1.951 | 0.574 | -3.400  | 6.7E-04  | 0.00275772 | Bmx           |
| ENSMUSG00000010663 | 2200.315  | -1.952 | 0.133 | -14.627 | 1.9E-48  | 9.9448E-47 | Fads1         |
| ENSMUSG00000087259 | 160.366   | -1.957 | 0.514 | -3.810  | 1.4E-04  | 0.00064607 | 2610035D17Rik |
| ENSMUSG00000093622 | 30.076    | -1.959 | 0.593 | -3.304  | 9.5E-04  | 0.00379996 | Gm20703       |
| ENSMUSG00000035834 | 220.993   | -1.964 | 0.366 | -5.364  | 8.1E-08  | 5.8733E-07 | Polr3g        |
| ENSMUSG00000107000 | 39.022    | -1.965 | 0.612 | -3.213  | 1.3E-03  | 0.00509993 | Gm43481       |
| ENSMUSG00000039958 | 142.655   | -1.967 | 0.352 | -5.588  | 2.3E-08  | 1.7637E-07 | Etfbkmt       |
| ENSMUSG00000103174 | 105.801   | -1.971 | 0.467 | -4.220  | 2.4E-05  | 0.00012735 | Gm37168       |
| ENSMUSG00000047592 | 2091.662  | -1.979 | 0.131 | -15.074 | 2.4E-51  | 1.3757E-49 | Nxpe5         |
| ENSMUSG00000011148 | 8508.597  | -1.981 | 0.114 | -17.416 | 6.2E-68  | 5.7418E-66 | Adss1l        |
| ENSMUSG00000023031 | 1132.950  | -1.981 | 0.172 | -11.542 | 8.1E-31  | 2.3635E-29 | Cela1         |
| ENSMUSG00000037306 | 4069.461  | -1.989 | 0.143 | -13.863 | 1.1E-43  | 4.8343E-42 | Man1c1        |
| ENSMUSG00000022408 | 228.437   | -1.991 | 0.441 | -4.519  | 6.2E-06  | 3.5507E-05 | Fam83f        |
| ENSMUSG00000031097 | 114.081   | -1.997 | 0.374 | -5.334  | 9.6E-08  | 6.8538E-07 | Tnni2         |
| ENSMUSG00000000627 | 41.838    | -2.003 | 0.809 | -2.474  | 1.3E-02  | 0.04035678 | Sema4f        |
| ENSMUSG00000030272 | 6899.652  | -2.006 | 0.093 | -21.674 | 3.6E-104 | 7.052E-102 | Camk1         |
| ENSMUSG00000049723 | 24756.525 | -2.009 | 0.193 | -10.390 | 2.8E-25  | 6.3394E-24 | Mmp12         |
| ENSMUSG00000001270 | 10332.842 | -2.020 | 0.127 | -15.909 | 5.4E-57  | 3.7322E-55 | Ckb           |
| ENSMUSG00000038295 | 54.069    | -2.021 | 0.665 | -3.041  | 2.4E-03  | 0.00868599 | Atg9b         |
| ENSMUSG00000026360 | 1893.857  | -2.022 | 0.176 | -11.490 | 1.5E-30  | 4.2778E-29 | Rgs2          |
| ENSMUSG00000036611 | 1935.291  | -2.026 | 0.246 | -8.245  | 1.7E-16  | 2.4212E-15 | Eepd1         |
| ENSMUSG00000028944 | 451.350   | -2.028 | 0.189 | -10.747 | 6.1E-27  | 1.5207E-25 | Prkg2         |
| ENSMUSG00000025810 | 8291.446  | -2.031 | 0.116 | -17.460 | 2.9E-68  | 2.6875E-66 | Nrp1          |
| ENSMUSG00000113313 | 122.564   | -2.031 | 0.362 | -5.607  | 2.1E-08  | 1.59E-07   | Gm32036       |
| ENSMUSG00000048174 | 100.220   | -2.036 | 0.510 | -3.994  | 6.5E-05  | 0.00031844 | Tmem81        |
| ENSMUSG00000033705 | 395.936   | -2.037 | 0.290 | -7.036  | 2.0E-12  | 2.1752E-11 | Stard9        |
| ENSMUSG00000091119 | 22.589    | -2.042 | 0.752 | -2.716  | 6.6E-03  | 0.02181134 | Ccdc152       |
| ENSMUSG00000027316 | 60.506    | -2.048 | 0.602 | -3.402  | 6.7E-04  | 0.00274049 | Gfra4         |
| ENSMUSG00000028743 | 1355.095  | -2.050 | 0.179 | -11.464 | 2.0E-30  | 5.7453E-29 | Akr7a5        |
| ENSMUSG00000026437 | 2633.310  | -2.050 | 0.202 | -10.164 | 2.9E-24  | 6.3862E-23 | Cdk18         |
| ENSMUSG00000071632 | 208.273   | -2.051 | 0.277 | -7.404  | 1.3E-13  | 1.5949E-12 | 2510002D24Rik |
| ENSMUSG00000048240 | 45.102    | -2.055 | 0.771 | -2.665  | 7.7E-03  | 0.02489525 | Gng7          |
| ENSMUSG00000049670 | 69.922    | -2.061 | 0.755 | -2.730  | 6.3E-03  | 0.02097523 | Morn4         |
| ENSMUSG00000026712 | 6218.898  | -2.065 | 0.129 | -16.058 | 5.0E-58  | 3.5312E-56 | Mrc1          |
| ENSMUSG00000102813 | 699.319   | -2.066 | 0.194 | -10.632 | 2.1E-26  | 5.1216E-25 | Gm37795       |
| ENSMUSG00000039648 | 81.625    | -2.072 | 0.672 | -3.085  | 2.0E-03  | 0.00759532 | Kyat1         |
| ENSMUSG00000053687 | 203.996   | -2.072 | 0.233 | -8.892  | 6.0E-19  | 1.0314E-17 | Dpep2         |
| ENSMUSG00000026473 | 2963.974  | -2.076 | 0.114 | -18.247 | 2.2E-74  | 2.2781E-72 | Glul          |
| ENSMUSG00000034424 | 2169.652  | -2.076 | 0.139 | -14.916 | 2.6E-50  | 1.4538E-48 | Gesh          |
| ENSMUSG00000022562 | 267.457   | -2.079 | 0.291 | -7.154  | 8.4E-13  | 9.5382E-12 | Oplah         |
| ENSMUSG00000039781 | 200.807   | -2.079 | 0.319 | -6.514  | 7.3E-11  | 7.1068E-10 | Cep131        |
| ENSMUSG00000109556 | 105.266   | -2.083 | 0.431 | -4.831  | 1.4E-06  | 8.4028E-06 | Gm38843       |
| ENSMUSG00000086468 | 18.597    | -2.088 | 0.828 | -2.522  | 1.2E-02  | 0.03586587 | Etaa1os       |
| ENSMUSG00000021913 | 24.571    | -2.090 | 0.799 | -2.615  | 8.9E-03  | 0.02828468 | Ogdhl         |
| ENSMUSG00000097061 | 89.237    | -2.091 | 0.498 | -4.199  | 2.7E-05  | 0.00013852 | 9330151L19Rik |
| ENSMUSG00000092171 | 29.655    | -2.091 | 0.624 | -3.349  | 8.1E-04  | 0.00327094 | 4833427F10Rik |
| ENSMUSG00000032911 | 34.798    | -2.093 | 0.711 | -2.945  | 3.2E-03  | 0.01152993 | Cspg4         |
| ENSMUSG00000032527 | 289.154   | -2.094 | 0.268 | -7.802  | 6.1E-15  | 8.0053E-14 | Pccb          |
| ENSMUSG00000084946 | 28.591    | -2.095 | 0.631 | -3.320  | 9.0E-04  | 0.00359858 | Dlx1as        |
| ENSMUSG00000063506 | 456.651   | -2.097 | 0.230 | -9.111  | 8.1E-20  | 1.4549E-18 | Arhgap22      |
| ENSMUSG00000030708 | 99.317    | -2.106 | 0.403 | -5.233  | 1.7E-07  | 1.1602E-06 | Dnajb13       |

|                    |           |        |       |         |         |            |               |
|--------------------|-----------|--------|-------|---------|---------|------------|---------------|
| ENSMUSG00000078870 | 31.208    | -2.106 | 0.538 | -3.914  | 9.1E-05 | 0.00043361 | Gm14410       |
| ENSMUSG00000061143 | 661.792   | -2.122 | 0.236 | -8.998  | 2.3E-19 | 4.0401E-18 | Maml3         |
| ENSMUSG00000030329 | 284.840   | -2.122 | 0.340 | -6.245  | 4.2E-10 | 3.8593E-09 | Pianp         |
| ENSMUSG00000026627 | 1669.801  | -2.122 | 0.126 | -16.865 | 8.1E-64 | 6.7269E-62 | Pacc1         |
| ENSMUSG00000042724 | 111.897   | -2.130 | 0.612 | -3.480  | 5.0E-04 | 0.0021034  | Map3k9        |
| ENSMUSG00000041707 | 611.563   | -2.133 | 0.269 | -7.930  | 2.2E-15 | 2.9664E-14 | Tmem273       |
| ENSMUSG00000064105 | 348.019   | -2.135 | 0.278 | -7.674  | 1.7E-14 | 2.1338E-13 | Cnnm2         |
| ENSMUSG00000036743 | 80.798    | -2.135 | 0.582 | -3.669  | 2.4E-04 | 0.00108398 | Psma8         |
| ENSMUSG00000042978 | 253.332   | -2.140 | 0.448 | -4.776  | 1.8E-06 | 1.0897E-05 | Sbk1          |
| ENSMUSG00000030409 | 2924.875  | -2.158 | 0.182 | -11.840 | 2.4E-32 | 7.5551E-31 | Dmpk          |
| ENSMUSG00000108693 | 134.925   | -2.158 | 0.554 | -3.896  | 9.8E-05 | 0.00046323 | Gm45153       |
| ENSMUSG00000106951 | 55.959    | -2.163 | 0.595 | -3.636  | 2.8E-04 | 0.00122091 | 5930430L01Rik |
| ENSMUSG00000033788 | 54.550    | -2.164 | 0.647 | -3.342  | 8.3E-04 | 0.00334309 | Dysf          |
| ENSMUSG00000049321 | 34.688    | -2.172 | 0.903 | -2.406  | 1.6E-02 | 0.04763863 | Zfp2          |
| ENSMUSG00000093880 | 15.346    | -2.176 | 0.829 | -2.626  | 8.7E-03 | 0.02758183 | Tmem181c-ps   |
| ENSMUSG00000041189 | 37.099    | -2.176 | 0.765 | -2.845  | 4.4E-03 | 0.01537197 | Chrb1         |
| ENSMUSG00000078789 | 827.445   | -2.178 | 0.170 | -12.808 | 1.5E-37 | 5.5988E-36 | Dph1          |
| ENSMUSG00000054967 | 49.576    | -2.178 | 0.641 | -3.400  | 6.7E-04 | 0.00275501 | Zfp647        |
| ENSMUSG00000085890 | 52.915    | -2.180 | 0.535 | -4.073  | 4.6E-05 | 0.00023218 | Tnfsf13os     |
| ENSMUSG00000094786 | 25.724    | -2.181 | 0.748 | -2.917  | 3.5E-03 | 0.0125027  | Gm14403       |
| ENSMUSG00000025934 | 452.792   | -2.182 | 0.360 | -6.060  | 1.4E-09 | 1.1815E-08 | Gsta3         |
| ENSMUSG00000020658 | 100.709   | -2.183 | 0.623 | -3.504  | 4.6E-04 | 0.00193121 | Efr3b         |
| ENSMUSG00000033446 | 2068.463  | -2.185 | 0.159 | -13.741 | 5.7E-43 | 2.5706E-41 | Lpar6         |
| ENSMUSG00000041762 | 99.279    | -2.185 | 0.527 | -4.145  | 3.4E-05 | 0.00017315 | Gpr155        |
| ENSMUSG00000030851 | 51.373    | -2.187 | 0.644 | -3.394  | 6.9E-04 | 0.00281489 | Ldhc          |
| ENSMUSG00000031906 | 134.264   | -2.188 | 0.584 | -3.744  | 1.8E-04 | 0.00082577 | Smpd3         |
| ENSMUSG00000047875 | 638.994   | -2.188 | 0.243 | -9.012  | 2.0E-19 | 3.5434E-18 | Gpr157        |
| ENSMUSG00000027223 | 23.773    | -2.190 | 0.769 | -2.846  | 4.4E-03 | 0.0153245  | Mapk8ip1      |
| ENSMUSG00000020053 | 17437.115 | -2.195 | 0.128 | -17.095 | 1.6E-65 | 1.4027E-63 | Igfl          |
| ENSMUSG00000027358 | 360.518   | -2.203 | 0.285 | -7.736  | 1.0E-14 | 1.3314E-13 | Bmp2          |
| ENSMUSG00000026939 | 587.227   | -2.205 | 0.197 | -11.194 | 4.4E-29 | 1.1865E-27 | Tmem141       |
| ENSMUSG00000032246 | 35.900    | -2.207 | 0.613 | -3.597  | 3.2E-04 | 0.00139906 | Calml4        |
| ENSMUSG00000032744 | 113.943   | -2.212 | 0.521 | -4.244  | 2.2E-05 | 0.00011537 | Heyl          |
| ENSMUSG00000031129 | 1746.647  | -2.217 | 0.198 | -11.179 | 5.2E-29 | 1.3978E-27 | Slc9a9        |
| ENSMUSG00000091811 | 479.556   | -2.218 | 0.213 | -10.426 | 1.9E-25 | 4.353E-24  | Inafm1        |
| ENSMUSG00000116656 | 15.708    | -2.221 | 0.813 | -2.733  | 6.3E-03 | 0.02083046 | Gm49708       |
| ENSMUSG00000040229 | 116.910   | -2.225 | 0.543 | -4.097  | 4.2E-05 | 0.00021138 | Gpr34         |
| ENSMUSG00000005951 | 85.053    | -2.235 | 0.636 | -3.513  | 4.4E-04 | 0.0018769  | Shpk          |
| ENSMUSG00000023912 | 46.559    | -2.239 | 0.579 | -3.870  | 1.1E-04 | 0.00051401 | Slc25a27      |
| ENSMUSG00000043833 | 171.031   | -2.243 | 0.325 | -6.911  | 4.8E-12 | 5.1294E-11 | 2900005J15Rik |
| ENSMUSG00000028238 | 2961.175  | -2.246 | 0.186 | -12.084 | 1.3E-33 | 4.1703E-32 | Atp6v0d2      |
| ENSMUSG00000072437 | 262.792   | -2.246 | 0.345 | -6.509  | 7.6E-11 | 7.316E-10  | Nanos1        |
| ENSMUSG00000029762 | 4196.855  | -2.247 | 0.141 | -15.942 | 3.3E-57 | 2.2648E-55 | Akr1b8        |
| ENSMUSG00000118669 | 99.592    | -2.257 | 0.538 | -4.193  | 2.8E-05 | 0.00014247 | AC084822.1    |
| ENSMUSG00000073242 | 226.547   | -2.270 | 0.355 | -6.395  | 1.6E-10 | 1.5233E-09 | Dnmt3aos      |
| ENSMUSG00000033857 | 696.787   | -2.271 | 0.349 | -6.513  | 7.3E-11 | 7.1134E-10 | Engase        |
| ENSMUSG00000055150 | 54.293    | -2.273 | 0.522 | -4.354  | 1.3E-05 | 7.2866E-05 | Zfp78         |
| ENSMUSG00000106219 | 48.481    | -2.280 | 0.609 | -3.744  | 1.8E-04 | 0.00082464 | 5830416I19Rik |
| ENSMUSG00000052102 | 4594.580  | -2.281 | 0.117 | -19.425 | 4.7E-84 | 5.8778E-82 | Gnpdal        |
| ENSMUSG00000092528 | 29.875    | -2.289 | 0.911 | -2.513  | 1.2E-02 | 0.03673464 | Nlrp1c-ps     |
| ENSMUSG00000026791 | 996.464   | -2.290 | 0.193 | -11.837 | 2.5E-32 | 7.8147E-31 | Slc2a8        |
| ENSMUSG00000115003 | 27.712    | -2.291 | 0.678 | -3.380  | 7.2E-04 | 0.00294346 | Gm48933       |

|                    |           |        |       |         |          |            |               |
|--------------------|-----------|--------|-------|---------|----------|------------|---------------|
| ENSMUSG00000078817 | 42.924    | -2.292 | 0.822 | -2.789  | 5.3E-03  | 0.01794728 | Nlrp12        |
| ENSMUSG00000053040 | 631.920   | -2.292 | 0.194 | -11.811 | 3.4E-32  | 1.0586E-30 | Apl1c         |
| ENSMUSG00000039058 | 38.106    | -2.301 | 0.793 | -2.901  | 3.7E-03  | 0.01309246 | Ak5           |
| ENSMUSG00000015568 | 65896.166 | -2.307 | 0.136 | -16.945 | 2.1E-64  | 1.7621E-62 | Lpl           |
| ENSMUSG00000039518 | 36.869    | -2.309 | 0.935 | -2.469  | 1.4E-02  | 0.04084195 | Cdsn          |
| ENSMUSG00000073755 | 134.187   | -2.313 | 0.607 | -3.810  | 1.4E-04  | 0.00064505 | 5730409E04Rik |
| ENSMUSG00000068854 | 176.214   | -2.316 | 0.421 | -5.506  | 3.7E-08  | 2.7558E-07 | H2bc21        |
| ENSMUSG00000030147 | 271.546   | -2.321 | 0.260 | -8.927  | 4.4E-19  | 7.5398E-18 | Clec4b1       |
| ENSMUSG00000097328 | 843.972   | -2.321 | 0.170 | -13.691 | 1.2E-42  | 5.1465E-41 | Tnfsf12       |
| ENSMUSG00000038210 | 21.497    | -2.325 | 0.851 | -2.732  | 6.3E-03  | 0.02091642 | Hoxa11        |
| ENSMUSG00000028777 | 67.300    | -2.327 | 0.545 | -4.270  | 2.0E-05  | 0.00010332 | Gnat3         |
| ENSMUSG00000031458 | 804.366   | -2.331 | 0.184 | -12.652 | 1.1E-36  | 3.9987E-35 | Coprs         |
| ENSMUSG00000072494 | 97.725    | -2.334 | 0.417 | -5.593  | 2.2E-08  | 1.7195E-07 | Ppp1r3e       |
| ENSMUSG00000036086 | 563.347   | -2.340 | 0.245 | -9.544  | 1.4E-21  | 2.7129E-20 | Zranb3        |
| ENSMUSG00000093677 | 39.072    | -2.340 | 0.561 | -4.174  | 3.0E-05  | 0.00015401 | Gm20712       |
| ENSMUSG00000059824 | 178.637   | -2.345 | 0.382 | -6.143  | 8.1E-10  | 7.2155E-09 | Dbp           |
| ENSMUSG00000031385 | 57.114    | -2.348 | 0.725 | -3.238  | 1.2E-03  | 0.00471242 | Plxnb3        |
| ENSMUSG00000029650 | 720.116   | -2.353 | 0.247 | -9.543  | 1.4E-21  | 2.7259E-20 | Slc46a3       |
| ENSMUSG00000097412 | 111.747   | -2.354 | 0.386 | -6.090  | 1.1E-09  | 9.9022E-09 | 1810014B01Rik |
| ENSMUSG00000003546 | 2967.002  | -2.354 | 0.142 | -16.601 | 6.8E-62  | 5.2759E-60 | Klc4          |
| ENSMUSG00000042099 | 436.839   | -2.355 | 0.294 | -8.003  | 1.2E-15  | 1.6763E-14 | Kank3         |
| ENSMUSG00000079445 | 204.332   | -2.361 | 0.686 | -3.442  | 5.8E-04  | 0.00239066 | B3gnt7        |
| ENSMUSG00000030340 | 132.977   | -2.361 | 0.613 | -3.851  | 1.2E-04  | 0.0005515  | Scnn1a        |
| ENSMUSG00000038508 | 4974.287  | -2.362 | 0.195 | -12.080 | 1.3E-33  | 4.376E-32  | Gdf15         |
| ENSMUSG00000097650 | 25.085    | -2.363 | 0.675 | -3.500  | 4.6E-04  | 0.00195937 | 4921507G05Rik |
| ENSMUSG00000105954 | 65.147    | -2.370 | 0.366 | -6.482  | 9.0E-11  | 8.6981E-10 | Gm42793       |
| ENSMUSG00000116640 | 12.673    | -2.371 | 0.870 | -2.724  | 6.4E-03  | 0.02134374 | Gm8670        |
| ENSMUSG00000031971 | 149.717   | -2.372 | 0.378 | -6.278  | 3.4E-10  | 3.1507E-09 | Ccsap         |
| ENSMUSG00000018752 | 37.029    | -2.374 | 0.470 | -5.055  | 4.3E-07  | 2.8252E-06 | Tnfsfm13      |
| ENSMUSG00000099689 | 32.823    | -2.378 | 0.734 | -3.241  | 1.2E-03  | 0.00465874 | Zfp383        |
| ENSMUSG00000036641 | 42.255    | -2.379 | 0.605 | -3.934  | 8.3E-05  | 0.00040109 | Ccdc148       |
| ENSMUSG00000021003 | 2962.170  | -2.380 | 0.148 | -16.071 | 4.1E-58  | 2.889E-56  | Galc          |
| ENSMUSG00000040209 | 184.965   | -2.383 | 0.412 | -5.785  | 7.2E-09  | 5.8492E-08 | Zfp704        |
| ENSMUSG00000037185 | 138.606   | -2.384 | 0.502 | -4.749  | 2.0E-06  | 1.2378E-05 | Krt80         |
| ENSMUSG00000021822 | 5087.288  | -2.385 | 0.216 | -11.023 | 3.0E-28  | 7.7921E-27 | Plau          |
| ENSMUSG00000038843 | 1769.779  | -2.391 | 0.165 | -14.532 | 7.6E-48  | 3.9152E-46 | Gent1         |
| ENSMUSG00000107884 | 26.948    | -2.391 | 0.785 | -3.045  | 2.3E-03  | 0.00858597 | Gm44144       |
| ENSMUSG00000020654 | 684.306   | -2.392 | 0.208 | -11.477 | 1.7E-30  | 4.9655E-29 | Adcy3         |
| ENSMUSG00000027698 | 9191.127  | -2.393 | 0.113 | -21.198 | 9.9E-100 | 1.7606E-97 | Nceh1         |
| ENSMUSG00000014164 | 60.409    | -2.402 | 0.418 | -5.753  | 8.7E-09  | 7.0135E-08 | Klh13         |
| ENSMUSG00000042675 | 2843.209  | -2.404 | 0.160 | -15.037 | 4.2E-51  | 2.4123E-49 | Ypel3         |
| ENSMUSG00000024781 | 50530.275 | -2.408 | 0.079 | -30.492 | 3.3E-204 | 3.09E-201  | Lipa          |
| ENSMUSG00000027173 | 350.452   | -2.408 | 0.263 | -9.149  | 5.7E-20  | 1.0338E-18 | Depdc7        |
| ENSMUSG00000101678 | 8.386     | -2.409 | 0.979 | -2.461  | 1.4E-02  | 0.04164436 | Gm29609       |
| ENSMUSG00000037217 | 400.428   | -2.411 | 0.271 | -8.887  | 6.3E-19  | 1.0727E-17 | Syn1          |
| ENSMUSG00000054589 | 38.079    | -2.420 | 0.696 | -3.480  | 5.0E-04  | 0.0021034  | Gm9949        |
| ENSMUSG00000051098 | 286.038   | -2.423 | 0.338 | -7.166  | 7.7E-13  | 8.7752E-12 | Mblac2        |
| ENSMUSG00000005493 | 18.620    | -2.425 | 0.951 | -2.551  | 1.1E-02  | 0.03330023 | Msh4          |
| ENSMUSG00000030729 | 402.881   | -2.429 | 0.213 | -11.429 | 3.0E-30  | 8.5624E-29 | Pgm211        |
| ENSMUSG00000039976 | 102.434   | -2.435 | 0.583 | -4.175  | 3.0E-05  | 0.00015335 | Tbc1d16       |
| ENSMUSG00000015980 | 426.458   | -2.444 | 0.294 | -8.311  | 9.5E-17  | 1.4173E-15 | Lrrc27        |
| ENSMUSG00000098055 | 17.275    | -2.451 | 0.940 | -2.606  | 9.1E-03  | 0.02892448 | Gm26947       |

|                    |           |        |       |         |          |            |               |
|--------------------|-----------|--------|-------|---------|----------|------------|---------------|
| ENSMUSG00000022415 | 6795.189  | -2.451 | 0.105 | -23.356 | 1.2E-120 | 3.543E-118 | Syngr1        |
| ENSMUSG00000112539 | 14.868    | -2.454 | 1.021 | -2.403  | 1.6E-02  | 0.04800353 | Gm40787       |
| ENSMUSG00000042770 | 802.471   | -2.457 | 0.203 | -12.089 | 1.2E-33  | 3.9476E-32 | Hebp1         |
| ENSMUSG00000052912 | 13.342    | -2.467 | 0.976 | -2.528  | 1.1E-02  | 0.03532181 | Smarca5-ps    |
| ENSMUSG00000000149 | 801.723   | -2.468 | 0.413 | -5.972  | 2.3E-09  | 1.9881E-08 | Gna12         |
| ENSMUSG00000089669 | 42.902    | -2.468 | 0.510 | -4.835  | 1.3E-06  | 8.2407E-06 | Tnfsf13       |
| ENSMUSG00000028555 | 20.971    | -2.478 | 0.759 | -3.266  | 1.1E-03  | 0.0042922  | Ttc39a        |
| ENSMUSG00000026450 | 38.811    | -2.482 | 0.820 | -3.027  | 2.5E-03  | 0.00905489 | Chit1         |
| ENSMUSG00000037509 | 88.888    | -2.486 | 0.563 | -4.419  | 9.9E-06  | 5.4975E-05 | Arhgef4       |
| ENSMUSG00000054510 | 121.123   | -2.502 | 0.444 | -5.634  | 1.8E-08  | 1.3669E-07 | Gm14461       |
| ENSMUSG00000104150 | 28.584    | -2.507 | 0.737 | -3.402  | 6.7E-04  | 0.00274049 | Gm44573       |
| ENSMUSG00000037868 | 1385.818  | -2.512 | 0.190 | -13.194 | 9.5E-40  | 3.8661E-38 | Egr2          |
| ENSMUSG00000021768 | 62.863    | -2.521 | 0.651 | -3.870  | 1.1E-04  | 0.00051401 | Dusp13        |
| ENSMUSG00000000126 | 36.687    | -2.525 | 0.981 | -2.573  | 1.0E-02  | 0.03146064 | Wnt9a         |
| ENSMUSG00000024663 | 6280.315  | -2.525 | 0.158 | -15.984 | 1.6E-57  | 1.1457E-55 | Rab3il1       |
| ENSMUSG00000005043 | 512.421   | -2.529 | 0.262 | -9.641  | 5.4E-22  | 1.0768E-20 | Sgsh          |
| ENSMUSG00000103808 | 35.913    | -2.531 | 0.736 | -3.441  | 5.8E-04  | 0.00240558 | Gm37060       |
| ENSMUSG00000039206 | 3496.637  | -2.543 | 0.127 | -20.057 | 1.7E-89  | 2.617E-87  | Daglb         |
| ENSMUSG00000026365 | 1056.040  | -2.550 | 0.229 | -11.126 | 9.4E-29  | 2.5298E-27 | Cfh           |
| ENSMUSG00000025950 | 12314.152 | -2.552 | 0.112 | -22.699 | 4.6E-114 | 1.161E-111 | Idh1          |
| ENSMUSG00000021567 | 262.378   | -2.554 | 0.327 | -7.821  | 5.2E-15  | 6.8831E-14 | Nkd2          |
| ENSMUSG00000085129 | 60.100    | -2.566 | 0.744 | -3.447  | 5.7E-04  | 0.00234935 | 5031425F14Rik |
| ENSMUSG00000067714 | 137.605   | -2.568 | 0.549 | -4.677  | 2.9E-06  | 1.7361E-05 | Lpar5         |
| ENSMUSG00000063193 | 11616.364 | -2.584 | 0.111 | -23.344 | 1.6E-120 | 4.526E-118 | Cd3001b       |
| ENSMUSG00000041797 | 423.755   | -2.591 | 0.341 | -7.589  | 3.2E-14  | 4.0494E-13 | Abca9         |
| ENSMUSG00000048965 | 275.703   | -2.593 | 0.334 | -7.767  | 8.0E-15  | 1.0466E-13 | Mrgpre        |
| ENSMUSG00000119926 | 19.554    | -2.596 | 0.732 | -3.547  | 3.9E-04  | 0.001669   | AL450395.1    |
| ENSMUSG00000116223 | 10.664    | -2.599 | 1.044 | -2.490  | 1.3E-02  | 0.03884137 | Gm41396       |
| ENSMUSG00000104018 | 19.494    | -2.599 | 1.020 | -2.549  | 1.1E-02  | 0.03346419 | 4833412K13Rik |
| ENSMUSG00000035769 | 108.157   | -2.604 | 0.962 | -2.706  | 6.8E-03  | 0.02241858 | Xylb          |
| ENSMUSG00000115186 | 15.864    | -2.613 | 0.901 | -2.900  | 3.7E-03  | 0.01313037 | Gm49417       |
| ENSMUSG00000027435 | 19859.925 | -2.615 | 0.137 | -19.125 | 1.6E-81  | 1.8603E-79 | Cd93          |
| ENSMUSG00000020150 | 633.153   | -2.619 | 0.180 | -14.580 | 3.7E-48  | 1.9487E-46 | Gamt          |
| ENSMUSG00000026389 | 974.996   | -2.623 | 0.248 | -10.578 | 3.8E-26  | 8.9822E-25 | Steap3        |
| ENSMUSG00000024186 | 99.548    | -2.626 | 0.674 | -3.896  | 9.8E-05  | 0.00046362 | Rgs11         |
| ENSMUSG00000104114 | 31.101    | -2.628 | 0.859 | -3.058  | 2.2E-03  | 0.00824444 | Gm37297       |
| ENSMUSG00000037736 | 52.965    | -2.636 | 0.729 | -3.616  | 3.0E-04  | 0.00130998 | Limch1        |
| ENSMUSG00000100235 | 50.860    | -2.638 | 0.702 | -3.755  | 1.7E-04  | 0.00079302 | Gm28557       |
| ENSMUSG00000005373 | 9.690     | -2.651 | 1.066 | -2.488  | 1.3E-02  | 0.03904707 | Mlxip1        |
| ENSMUSG00000038903 | 12.179    | -2.656 | 1.019 | -2.606  | 9.2E-03  | 0.02896626 | Ccdc68        |
| ENSMUSG00000049871 | 274.886   | -2.657 | 0.299 | -8.884  | 6.5E-19  | 1.0985E-17 | Nlrc3         |
| ENSMUSG00000052364 | 114.319   | -2.660 | 0.457 | -5.822  | 5.8E-09  | 4.775E-08  | B630019K06Rik |
| ENSMUSG00000052512 | 987.091   | -2.667 | 0.194 | -13.754 | 4.8E-43  | 2.1587E-41 | Nav2          |
| ENSMUSG00000022353 | 2043.695  | -2.683 | 0.165 | -16.229 | 3.1E-59  | 2.2698E-57 | Mtss1         |
| ENSMUSG00000032122 | 14665.917 | -2.690 | 0.142 | -18.930 | 6.5E-80  | 7.5421E-78 | Slc37a2       |
| ENSMUSG00000041012 | 74.420    | -2.691 | 0.867 | -3.102  | 1.9E-03  | 0.0072014  | Cmtm8         |
| ENSMUSG00000102620 | 33.086    | -2.693 | 0.993 | -2.711  | 6.7E-03  | 0.02212957 | Gm37675       |
| ENSMUSG00000022235 | 83.278    | -2.694 | 0.575 | -4.685  | 2.8E-06  | 1.6709E-05 | Cmb1          |
| ENSMUSG00000029299 | 225.277   | -2.698 | 0.683 | -3.952  | 7.8E-05  | 0.0003751  | Abcg3         |
| ENSMUSG00000060568 | 78.243    | -2.699 | 0.566 | -4.768  | 1.9E-06  | 1.1333E-05 | Fam78b        |
| ENSMUSG00000047747 | 471.367   | -2.700 | 0.335 | -8.055  | 8.0E-16  | 1.1161E-14 | Rnfl50        |
| ENSMUSG00000034522 | 334.424   | -2.702 | 0.267 | -10.103 | 5.3E-24  | 1.1797E-22 | Zfp395        |



|                    |           |        |       |         |          |            |               |
|--------------------|-----------|--------|-------|---------|----------|------------|---------------|
| ENSMUSG00000071669 | 488.934   | -2.705 | 0.268 | -10.080 | 6.7E-24  | 1.4784E-22 | Snx29         |
| ENSMUSG00000085081 | 24.539    | -2.705 | 0.857 | -3.156  | 1.6E-03  | 0.00609697 | Rptoros       |
| ENSMUSG00000017417 | 397.831   | -2.717 | 0.258 | -10.536 | 5.9E-26  | 1.4042E-24 | Plxdc1        |
| ENSMUSG00000114401 | 10.238    | -2.723 | 1.056 | -2.580  | 9.9E-03  | 0.0309257  | Gm38604       |
| ENSMUSG00000038351 | 206.694   | -2.728 | 0.407 | -6.708  | 2.0E-11  | 2.0033E-10 | Sgsm2         |
| ENSMUSG00000037432 | 26.046    | -2.750 | 0.680 | -4.044  | 5.3E-05  | 0.00026167 | Fer115        |
| ENSMUSG00000040722 | 1808.009  | -2.752 | 0.188 | -14.615 | 2.3E-48  | 1.1862E-46 | Scamp5        |
| ENSMUSG00000086111 | 18.852    | -2.757 | 1.039 | -2.653  | 8.0E-03  | 0.02570871 | Gm15326       |
| ENSMUSG00000028278 | 309.326   | -2.761 | 0.416 | -6.636  | 3.2E-11  | 3.2179E-10 | Rragd         |
| ENSMUSG00000047363 | 18.406    | -2.764 | 0.913 | -3.027  | 2.5E-03  | 0.00904125 | Cstad         |
| ENSMUSG00000036523 | 40.136    | -2.765 | 0.633 | -4.369  | 1.3E-05  | 6.8254E-05 | Greb1         |
| ENSMUSG00000041633 | 101.816   | -2.767 | 0.411 | -6.741  | 1.6E-11  | 1.6037E-10 | Kctd12b       |
| ENSMUSG00000051212 | 1024.865  | -2.775 | 0.178 | -15.573 | 1.1E-54  | 7.0069E-53 | Gpr183        |
| ENSMUSG00000039814 | 40.664    | -2.786 | 0.687 | -4.054  | 5.0E-05  | 0.00025116 | Xkr5          |
| ENSMUSG00000039908 | 906.512   | -2.788 | 0.227 | -12.270 | 1.3E-34  | 4.4264E-33 | Slc26a11      |
| ENSMUSG00000069804 | 23.337    | -2.795 | 1.082 | -2.584  | 9.8E-03  | 0.03063397 | Gm10277       |
| ENSMUSG00000110388 | 89.774    | -2.796 | 0.547 | -5.108  | 3.3E-07  | 2.1776E-06 | Gm30329       |
| ENSMUSG00000102143 | 15.237    | -2.799 | 1.039 | -2.695  | 7.0E-03  | 0.02303146 | Gm38057       |
| ENSMUSG00000038068 | 337.906   | -2.811 | 0.342 | -8.221  | 2.0E-16  | 2.9461E-15 | Rnfl44b       |
| ENSMUSG00000031434 | 49.505    | -2.821 | 0.728 | -3.873  | 1.1E-04  | 0.00050857 | Morc4         |
| ENSMUSG00000006800 | 1796.026  | -2.826 | 0.164 | -17.266 | 8.5E-67  | 7.6358E-65 | Sulf2         |
| ENSMUSG00000025902 | 34.353    | -2.826 | 1.050 | -2.691  | 7.1E-03  | 0.02328396 | Sox17         |
| ENSMUSG00000081809 | 9.532     | -2.826 | 1.054 | -2.682  | 7.3E-03  | 0.02383746 | Gm15539       |
| ENSMUSG00000020264 | 129.258   | -2.828 | 0.444 | -6.365  | 2.0E-10  | 1.8338E-09 | Slc36a2       |
| ENSMUSG00000044816 | 43.610    | -2.832 | 0.897 | -3.158  | 1.6E-03  | 0.00605739 | D630023F18Rik |
| ENSMUSG00000021226 | 1106.488  | -2.847 | 0.179 | -15.863 | 1.1E-56  | 7.7318E-55 | Acot2         |
| ENSMUSG00000020017 | 71.328    | -2.853 | 0.637 | -4.482  | 7.4E-06  | 4.1859E-05 | Hal           |
| ENSMUSG00000030657 | 396.297   | -2.876 | 0.244 | -11.806 | 3.7E-32  | 1.1258E-30 | Xylt1         |
| ENSMUSG00000107761 | 45.713    | -2.882 | 0.778 | -3.702  | 2.1E-04  | 0.00096141 | 2010008C14Rik |
| ENSMUSG00000032232 | 639.582   | -2.883 | 0.279 | -10.322 | 5.6E-25  | 1.2783E-23 | Cgnl1         |
| ENSMUSG00000104339 | 182.519   | -2.884 | 0.502 | -5.742  | 9.4E-09  | 7.4982E-08 | C130089K02Rik |
| ENSMUSG00000115230 | 182.672   | -2.887 | 0.369 | -7.821  | 5.2E-15  | 6.8802E-14 | AU022793      |
| ENSMUSG00000039956 | 181.949   | -2.897 | 0.472 | -6.132  | 8.7E-10  | 7.6782E-09 | Mrap          |
| ENSMUSG00000050390 | 233.632   | -2.934 | 0.423 | -6.934  | 4.1E-12  | 4.4125E-11 | C77080        |
| ENSMUSG00000008845 | 595.540   | -2.936 | 0.306 | -9.603  | 7.8E-22  | 1.5411E-20 | Cd163         |
| ENSMUSG00000022651 | 2250.848  | -2.938 | 0.263 | -11.164 | 6.1E-29  | 1.6579E-27 | Retnlg        |
| ENSMUSG00000032788 | 5907.520  | -2.944 | 0.113 | -26.060 | 1.0E-149 | 4.946E-147 | Pdxk          |
| ENSMUSG00000002944 | 41484.771 | -2.947 | 0.106 | -27.680 | 1.2E-168 | 8.681E-166 | Cd36          |
| ENSMUSG00000042734 | 58.151    | -2.958 | 0.784 | -3.771  | 1.6E-04  | 0.00074782 | Ttc9          |
| ENSMUSG00000115314 | 10.359    | -2.981 | 1.243 | -2.399  | 1.6E-02  | 0.04841027 | Gm48966       |
| ENSMUSG00000050022 | 473.366   | -2.986 | 0.334 | -8.953  | 3.5E-19  | 5.9913E-18 | Amz1          |
| ENSMUSG00000035314 | 321.149   | -2.988 | 0.458 | -6.524  | 6.8E-11  | 6.6369E-10 | Gdpd5         |
| ENSMUSG00000109005 | 11.763    | -3.013 | 0.950 | -3.171  | 1.5E-03  | 0.00582482 | Gm45221       |
| ENSMUSG00000074738 | 27.085    | -3.014 | 1.070 | -2.816  | 4.9E-03  | 0.01664177 | Fndc10        |
| ENSMUSG00000103715 | 15.795    | -3.014 | 1.124 | -2.680  | 7.4E-03  | 0.02391662 | 4933431K14Rik |
| ENSMUSG00000099759 | 7.769     | -3.016 | 1.212 | -2.489  | 1.3E-02  | 0.03894928 | 1700030C10Rik |
| ENSMUSG00000025020 | 74.687    | -3.022 | 0.657 | -4.598  | 4.3E-06  | 2.4893E-05 | Slit1         |
| ENSMUSG00000035509 | 17.864    | -3.044 | 1.142 | -2.667  | 7.7E-03  | 0.02480232 | Fbx121        |
| ENSMUSG00000036585 | 88.467    | -3.052 | 0.749 | -4.077  | 4.6E-05  | 0.00022908 | Fgfl          |
| ENSMUSG00000038332 | 2694.079  | -3.054 | 0.195 | -15.643 | 3.7E-55  | 2.3743E-53 | Sesn1         |
| ENSMUSG00000035459 | 225.326   | -3.057 | 0.413 | -7.398  | 1.4E-13  | 1.6643E-12 | Stab2         |
| ENSMUSG00000104432 | 10.253    | -3.059 | 1.275 | -2.399  | 1.6E-02  | 0.04841027 | A430027C01Rik |

|                    |           |        |       |         |          |            |               |
|--------------------|-----------|--------|-------|---------|----------|------------|---------------|
| ENSMUSG00000048200 | 228.829   | -3.068 | 0.379 | -8.106  | 5.2E-16  | 7.4135E-15 | Cracr2b       |
| ENSMUSG00000031438 | 14124.317 | -3.079 | 0.081 | -37.852 | 0.0E+00  | 0          | Rnfl128       |
| ENSMUSG00000085327 | 16.095    | -3.086 | 0.944 | -3.270  | 1.1E-03  | 0.00424549 | Gm16104       |
| ENSMUSG00000021384 | 3062.654  | -3.108 | 0.161 | -19.328 | 3.1E-83  | 3.8547E-81 | Susd3         |
| ENSMUSG00000053749 | 19.653    | -3.113 | 0.983 | -3.167  | 1.5E-03  | 0.00589229 | Gm9920        |
| ENSMUSG00000020542 | 9.741     | -3.120 | 1.284 | -2.429  | 1.5E-02  | 0.04508913 | Myocd         |
| ENSMUSG00000036862 | 32.010    | -3.132 | 1.188 | -2.636  | 8.4E-03  | 0.02689045 | Dchs1         |
| ENSMUSG00000109165 | 7.029     | -3.158 | 1.287 | -2.454  | 1.4E-02  | 0.04236527 | Gm45148       |
| ENSMUSG00000031451 | 8247.188  | -3.161 | 0.154 | -20.568 | 5.3E-94  | 8.4385E-92 | Gas6          |
| ENSMUSG00000022494 | 58.337    | -3.166 | 0.714 | -4.437  | 9.1E-06  | 5.0767E-05 | Shisa9        |
| ENSMUSG00000033082 | 18.825    | -3.179 | 1.107 | -2.871  | 4.1E-03  | 0.0142315  | Clec1a        |
| ENSMUSG00000032064 | 33.796    | -3.190 | 1.051 | -3.036  | 2.4E-03  | 0.00880183 | Dixdc1        |
| ENSMUSG00000117896 | 5.047     | -3.220 | 1.348 | -2.389  | 1.7E-02  | 0.04960539 | AA387883      |
| ENSMUSG00000039126 | 1050.240  | -3.225 | 0.214 | -15.068 | 2.6E-51  | 1.5074E-49 | Prune2        |
| ENSMUSG00000027955 | 593.020   | -3.233 | 0.309 | -10.466 | 1.2E-25  | 2.8909E-24 | Gask1b        |
| ENSMUSG00000115829 | 13.108    | -3.234 | 1.080 | -2.994  | 2.8E-03  | 0.01000775 | 4921515G04Rik |
| ENSMUSG00000041058 | 4663.356  | -3.247 | 0.168 | -19.358 | 1.7E-83  | 2.1524E-81 | Wwp1          |
| ENSMUSG00000032013 | 22.315    | -3.262 | 1.315 | -2.481  | 1.3E-02  | 0.03969921 | Trim29        |
| ENSMUSG00000086150 | 50.373    | -3.296 | 0.589 | -5.592  | 2.2E-08  | 1.7214E-07 | Bach2os       |
| ENSMUSG00000050071 | 26.791    | -3.302 | 0.877 | -3.766  | 1.7E-04  | 0.00076078 | Bex1          |
| ENSMUSG00000022106 | 5263.426  | -3.311 | 0.138 | -23.918 | 2.0E-126 | 6.766E-124 | Rcbtb2        |
| ENSMUSG00000004933 | 684.682   | -3.312 | 0.229 | -14.481 | 1.6E-47  | 8.2754E-46 | Matk          |
| ENSMUSG00000044708 | 70.906    | -3.313 | 0.729 | -4.544  | 5.5E-06  | 3.1697E-05 | Kcnj10        |
| ENSMUSG00000097007 | 7.207     | -3.320 | 1.308 | -2.538  | 1.1E-02  | 0.03440481 | 4930432B10Rik |
| ENSMUSG00000060512 | 95.921    | -3.355 | 0.577 | -5.809  | 6.3E-09  | 5.1094E-08 | 0610040J01Rik |
| ENSMUSG00000026012 | 1230.897  | -3.356 | 0.250 | -13.421 | 4.5E-41  | 1.9248E-39 | Cd28          |
| ENSMUSG00000000440 | 1488.770  | -3.364 | 0.173 | -19.477 | 1.7E-84  | 2.1685E-82 | Pparg         |
| ENSMUSG00000072949 | 187.425   | -3.368 | 0.914 | -3.684  | 2.3E-04  | 0.00102665 | Acot1         |
| ENSMUSG00000087291 | 20.129    | -3.368 | 1.261 | -2.670  | 7.6E-03  | 0.02453775 | Gm11946       |
| ENSMUSG00000025154 | 3728.436  | -3.376 | 0.145 | -23.313 | 3.3E-120 | 9.315E-118 | Arhgap19      |
| ENSMUSG00000025815 | 11.870    | -3.387 | 1.243 | -2.724  | 6.4E-03  | 0.02134633 | Dhtkd1        |
| ENSMUSG00000061578 | 61.382    | -3.394 | 0.682 | -4.974  | 6.5E-07  | 4.211E-06  | Ksr2          |
| ENSMUSG00000022419 | 267.786   | -3.397 | 0.346 | -9.805  | 1.1E-22  | 2.2145E-21 | Deptor        |
| ENSMUSG00000041272 | 15.336    | -3.417 | 1.374 | -2.486  | 1.3E-02  | 0.03918806 | Tox           |
| ENSMUSG00000025993 | 26585.003 | -3.422 | 0.110 | -31.224 | 5.1E-214 | 5.801E-211 | Slc40a1       |
| ENSMUSG00000034957 | 8665.170  | -3.428 | 0.104 | -32.852 | 1.1E-236 | 1.621E-233 | Cebpa         |
| ENSMUSG00000106157 | 41.041    | -3.428 | 0.905 | -3.789  | 1.5E-04  | 0.00069832 | 4930555A03Rik |
| ENSMUSG00000022579 | 23.296    | -3.429 | 1.414 | -2.425  | 1.5E-02  | 0.04551451 | Gpihbp1       |
| ENSMUSG00000059852 | 52.000    | -3.430 | 0.808 | -4.244  | 2.2E-05  | 0.00011546 | Kcng2         |
| ENSMUSG00000036411 | 15.868    | -3.438 | 1.110 | -3.098  | 1.9E-03  | 0.00729014 | 9530077C05Rik |
| ENSMUSG00000024437 | 11.376    | -3.453 | 1.010 | -3.419  | 6.3E-04  | 0.0025831  | Gm8615        |
| ENSMUSG00000034245 | 12.073    | -3.458 | 1.319 | -2.622  | 8.7E-03  | 0.02784685 | Hdac11        |
| ENSMUSG00000103115 | 11.890    | -3.502 | 1.340 | -2.613  | 9.0E-03  | 0.02846251 | Gm37584       |
| ENSMUSG00000020865 | 2992.969  | -3.542 | 0.185 | -19.163 | 7.5E-82  | 9.011E-80  | Abcc3         |
| ENSMUSG00000090659 | 37.227    | -3.545 | 1.025 | -3.460  | 5.4E-04  | 0.00225086 | Zfp493        |
| ENSMUSG00000109363 | 15.380    | -3.552 | 1.046 | -3.395  | 6.9E-04  | 0.00279895 | Gm44668       |
| ENSMUSG00000117763 | 20.204    | -3.556 | 1.199 | -2.967  | 3.0E-03  | 0.01082973 | 9830166K06Rik |
| ENSMUSG00000107429 | 7.186     | -3.564 | 1.315 | -2.712  | 6.7E-03  | 0.02208274 | Gm44206       |
| ENSMUSG00000110235 | 111.173   | -3.578 | 0.565 | -6.337  | 2.3E-10  | 2.1873E-09 | Gm5086        |
| ENSMUSG00000112276 | 72.693    | -3.591 | 0.535 | -6.712  | 1.9E-11  | 1.954E-10  | 5033421B08Rik |
| ENSMUSG00000047507 | 63.531    | -3.593 | 1.313 | -2.736  | 6.2E-03  | 0.02066132 | Baiap3        |
| ENSMUSG00000071324 | 37.162    | -3.625 | 1.094 | -3.314  | 9.2E-04  | 0.00366936 | Armc2         |

|                    |          |        |       |         |          |            |               |
|--------------------|----------|--------|-------|---------|----------|------------|---------------|
| ENSMUSG00000096606 | 70.414   | -3.681 | 0.753 | -4.886  | 1.0E-06  | 6.458E-06  | Tpbgl         |
| ENSMUSG00000078794 | 12.539   | -3.691 | 1.365 | -2.704  | 6.9E-03  | 0.02251286 | Dact3         |
| ENSMUSG00000040855 | 181.645  | -3.718 | 0.403 | -9.231  | 2.7E-20  | 4.8973E-19 | Reps2         |
| ENSMUSG00000025213 | 180.185  | -3.757 | 0.550 | -6.832  | 8.4E-12  | 8.7194E-11 | Kazald1       |
| ENSMUSG00000086109 | 301.600  | -3.783 | 0.390 | -9.699  | 3.1E-22  | 6.1892E-21 | Gm13391       |
| ENSMUSG00000109876 | 13.604   | -3.815 | 1.273 | -2.998  | 2.7E-03  | 0.00989313 | Gm45449       |
| ENSMUSG00000029384 | 21.718   | -3.821 | 1.062 | -3.599  | 3.2E-04  | 0.00139292 | 2010109A12Rik |
| ENSMUSG00000110115 | 16.911   | -3.830 | 1.546 | -2.477  | 1.3E-02  | 0.04006426 | Gm32486       |
| ENSMUSG00000024827 | 14.664   | -3.834 | 1.299 | -2.951  | 3.2E-03  | 0.01133784 | Gldc          |
| ENSMUSG00000104068 | 57.873   | -3.836 | 0.795 | -4.827  | 1.4E-06  | 8.5514E-06 | Gm37199       |
| ENSMUSG00000030737 | 607.461  | -3.868 | 0.338 | -11.443 | 2.5E-30  | 7.2966E-29 | Slco2b1       |
| ENSMUSG00000034829 | 18.694   | -3.890 | 1.416 | -2.746  | 6.0E-03  | 0.02012902 | Nxn11         |
| ENSMUSG00000020593 | 409.521  | -3.917 | 0.342 | -11.446 | 2.5E-30  | 7.0773E-29 | Lpin1         |
| ENSMUSG00000041930 | 30.257   | -4.015 | 1.054 | -3.808  | 1.4E-04  | 0.00065121 | Fam222a       |
| ENSMUSG00000034265 | 1276.865 | -4.047 | 0.369 | -10.965 | 5.6E-28  | 1.4624E-26 | Zdhhc14       |
| ENSMUSG00000028751 | 17.841   | -4.055 | 1.344 | -3.016  | 2.6E-03  | 0.00935019 | Pla2g2e       |
| ENSMUSG00000030433 | 17.665   | -4.056 | 1.532 | -2.648  | 8.1E-03  | 0.02602967 | Sbk2          |
| ENSMUSG00000043085 | 95.972   | -4.095 | 0.574 | -7.135  | 9.7E-13  | 1.0911E-11 | Tmem82        |
| ENSMUSG00000022885 | 994.546  | -4.120 | 0.328 | -12.543 | 4.4E-36  | 1.5546E-34 | St6gal1       |
| ENSMUSG00000050777 | 6203.016 | -4.122 | 0.175 | -23.584 | 5.6E-123 | 1.832E-120 | Tmem37        |
| ENSMUSG00000090564 | 34.361   | -4.184 | 0.877 | -4.772  | 1.8E-06  | 1.1126E-05 | A430057M04Rik |
| ENSMUSG00000114016 | 9.922    | -4.242 | 1.222 | -3.470  | 5.2E-04  | 0.00217277 | Gm47258       |
| ENSMUSG00000048142 | 73.842   | -4.255 | 0.817 | -5.208  | 1.9E-07  | 1.3121E-06 | Nat81         |
| ENSMUSG00000056596 | 31.883   | -4.289 | 1.091 | -3.930  | 8.5E-05  | 0.00040728 | Trnp1         |
| ENSMUSG00000030206 | 10.399   | -4.306 | 1.484 | -2.900  | 3.7E-03  | 0.01310339 | Gsg1          |
| ENSMUSG00000082513 | 8.158    | -4.358 | 1.778 | -2.451  | 1.4E-02  | 0.04263458 | Gm15374       |
| ENSMUSG00000099031 | 3.736    | -4.368 | 1.808 | -2.416  | 1.6E-02  | 0.04649806 | Mir7240       |
| ENSMUSG00000035121 | 5.387    | -4.377 | 1.807 | -2.422  | 1.5E-02  | 0.04578687 | Neil2         |
| ENSMUSG00000039798 | 5.070    | -4.396 | 1.681 | -2.616  | 8.9E-03  | 0.0282758  | 2600006K01Rik |
| ENSMUSG00000023019 | 161.004  | -4.406 | 0.566 | -7.778  | 7.4E-15  | 9.6409E-14 | Gpd1          |
| ENSMUSG00000054893 | 112.941  | -4.416 | 0.510 | -8.654  | 5.0E-18  | 8.0224E-17 | Zfp667        |
| ENSMUSG00000037224 | 141.876  | -4.420 | 0.625 | -7.071  | 1.5E-12  | 1.7127E-11 | Zfyve28       |
| ENSMUSG00000112558 | 5.140    | -4.428 | 1.799 | -2.462  | 1.4E-02  | 0.04159558 | Gm32364       |
| ENSMUSG00000027956 | 184.605  | -4.434 | 0.646 | -6.867  | 6.6E-12  | 6.9185E-11 | Tmem144       |
| ENSMUSG00000097365 | 17.962   | -4.453 | 1.280 | -3.478  | 5.0E-04  | 0.00211275 | C030034L19Rik |
| ENSMUSG00000026768 | 21.019   | -4.489 | 1.071 | -4.191  | 2.8E-05  | 0.00014326 | Itga8         |
| ENSMUSG00000000154 | 45.438   | -4.503 | 0.997 | -4.517  | 6.3E-06  | 3.5704E-05 | Slc22a18      |
| ENSMUSG00000075416 | 6.682    | -4.518 | 1.812 | -2.493  | 1.3E-02  | 0.03860231 | Gm14488       |
| ENSMUSG00000104164 | 116.453  | -4.519 | 0.722 | -6.261  | 3.8E-10  | 3.51E-09   | Gm38248       |
| ENSMUSG00000070868 | 85.519   | -4.523 | 1.070 | -4.227  | 2.4E-05  | 0.00012404 | Skint3        |
| ENSMUSG00000098251 | 7.586    | -4.536 | 1.696 | -2.675  | 7.5E-03  | 0.02426176 | Mir7656       |
| ENSMUSG00000102423 | 8.594    | -4.545 | 1.859 | -2.445  | 1.5E-02  | 0.04338509 | Gm37465       |
| ENSMUSG00000038665 | 25.022   | -4.557 | 1.391 | -3.276  | 1.1E-03  | 0.00416253 | Dgki          |
| ENSMUSG00000086424 | 13.382   | -4.634 | 1.266 | -3.661  | 2.5E-04  | 0.0011172  | Gm15569       |
| ENSMUSG00000049897 | 17.403   | -4.651 | 1.685 | -2.761  | 5.8E-03  | 0.01933581 | Stkl1         |
| ENSMUSG00000100572 | 7.500    | -4.661 | 1.787 | -2.609  | 9.1E-03  | 0.02873104 | 2410021H03Rik |
| ENSMUSG00000104206 | 5.515    | -4.698 | 1.870 | -2.513  | 1.2E-02  | 0.03673278 | Gm32250       |
| ENSMUSG00000118249 | 5.936    | -4.718 | 1.764 | -2.674  | 7.5E-03  | 0.02434261 | Gm36608       |
| ENSMUSG00000084995 | 5.904    | -4.722 | 1.719 | -2.746  | 6.0E-03  | 0.02012611 | Lyzl4os       |
| ENSMUSG00000020092 | 627.298  | -4.732 | 0.650 | -7.276  | 3.4E-13  | 4.0376E-12 | Pald1         |
| ENSMUSG00000098919 | 3.582    | -4.738 | 1.941 | -2.441  | 1.5E-02  | 0.0437167  | Mir8102       |
| ENSMUSG00000112948 | 4.823    | -4.781 | 1.967 | -2.431  | 1.5E-02  | 0.04486621 | Gm48871       |

|                    |         |        |       |        |         |            |               |
|--------------------|---------|--------|-------|--------|---------|------------|---------------|
| ENSMUSG00000041617 | 17.508  | -4.783 | 1.706 | -2.804 | 5.1E-03 | 0.01725195 | Ccdc74a       |
| ENSMUSG00000077457 | 5.869   | -4.790 | 1.725 | -2.777 | 5.5E-03 | 0.01853758 | Snord65       |
| ENSMUSG00000086340 | 3.475   | -4.792 | 1.926 | -2.487 | 1.3E-02 | 0.03905753 | 1810059C17Rik |
| ENSMUSG00000070527 | 17.390  | -4.797 | 1.706 | -2.812 | 4.9E-03 | 0.01685152 | Mkrm3         |
| ENSMUSG00000110129 | 7.958   | -4.809 | 1.843 | -2.609 | 9.1E-03 | 0.02872337 | Gm45453       |
| ENSMUSG00000086522 | 11.044  | -4.809 | 1.687 | -2.851 | 4.4E-03 | 0.01508088 | Gm4473        |
| ENSMUSG00000094562 | 26.636  | -4.828 | 1.089 | -4.433 | 9.3E-06 | 5.1669E-05 | Trav13-4-dv7  |
| ENSMUSG00000086003 | 5.172   | -4.860 | 1.833 | -2.652 | 8.0E-03 | 0.02576459 | B230206L02Rik |
| ENSMUSG00000085517 | 4.249   | -4.905 | 1.886 | -2.600 | 9.3E-03 | 0.02937376 | Gm12963       |
| ENSMUSG00000033377 | 11.265  | -4.905 | 1.660 | -2.955 | 3.1E-03 | 0.01120026 | Palmd         |
| ENSMUSG00000026023 | 9.876   | -4.909 | 1.983 | -2.476 | 1.3E-02 | 0.04022522 | Cdk15         |
| ENSMUSG00000097187 | 10.340  | -4.942 | 1.888 | -2.618 | 8.8E-03 | 0.0281286  | Gm19426       |
| ENSMUSG00000113922 | 5.049   | -4.952 | 2.065 | -2.398 | 1.7E-02 | 0.04857512 | Gm48887       |
| ENSMUSG00000080454 | 3.115   | -4.960 | 1.777 | -2.791 | 5.3E-03 | 0.01785597 | Gm24195       |
| ENSMUSG00000116883 | 2.659   | -4.968 | 1.833 | -2.710 | 6.7E-03 | 0.02217684 | Gm49700       |
| ENSMUSG00000038777 | 40.446  | -4.974 | 1.707 | -2.914 | 3.6E-03 | 0.01260976 | Sema6c        |
| ENSMUSG00000049804 | 20.691  | -5.013 | 1.614 | -3.106 | 1.9E-03 | 0.00711886 | Armex4        |
| ENSMUSG00000068877 | 30.078  | -5.018 | 1.094 | -4.586 | 4.5E-06 | 2.6191E-05 | Selenbp2      |
| ENSMUSG00000059606 | 5.295   | -5.020 | 1.718 | -2.923 | 3.5E-03 | 0.0122856  | Rnase2b       |
| ENSMUSG00000117994 | 11.951  | -5.042 | 1.743 | -2.893 | 3.8E-03 | 0.01338573 | Gm5820        |
| ENSMUSG00000105341 | 5.643   | -5.066 | 2.029 | -2.497 | 1.3E-02 | 0.03809897 | Gm43817       |
| ENSMUSG00000073652 | 4.982   | -5.079 | 1.820 | -2.790 | 5.3E-03 | 0.01787264 | Apol7d        |
| ENSMUSG00000045009 | 21.833  | -5.089 | 1.571 | -3.239 | 1.2E-03 | 0.00469135 | Prrt3         |
| ENSMUSG00000086291 | 5.514   | -5.091 | 1.827 | -2.787 | 5.3E-03 | 0.01804735 | Gm15513       |
| ENSMUSG00000034107 | 10.060  | -5.129 | 1.635 | -3.137 | 1.7E-03 | 0.00647065 | Ano7          |
| ENSMUSG00000026834 | 4.024   | -5.159 | 2.065 | -2.499 | 1.2E-02 | 0.03798292 | Acvr1c        |
| ENSMUSG00000102786 | 7.245   | -5.161 | 1.833 | -2.816 | 4.9E-03 | 0.0166359  | Gm38252       |
| ENSMUSG00000082964 | 7.136   | -5.164 | 1.660 | -3.112 | 1.9E-03 | 0.00700153 | Rpl13-ps5     |
| ENSMUSG00000070806 | 3.123   | -5.165 | 2.030 | -2.544 | 1.1E-02 | 0.03393218 | Zmynd12       |
| ENSMUSG00000101903 | 33.531  | -5.220 | 1.130 | -4.620 | 3.8E-06 | 2.2536E-05 | Gm29291       |
| ENSMUSG00000115124 | 5.640   | -5.229 | 2.142 | -2.441 | 1.5E-02 | 0.0437167  | Gm49201       |
| ENSMUSG00000026940 | 4.785   | -5.267 | 2.011 | -2.619 | 8.8E-03 | 0.0280693  | Ccdc183       |
| ENSMUSG00000116534 | 21.276  | -5.280 | 1.307 | -4.041 | 5.3E-05 | 0.00026514 | Gm49731       |
| ENSMUSG00000050050 | 4.613   | -5.283 | 2.094 | -2.523 | 1.2E-02 | 0.03581627 | Ccdc158       |
| ENSMUSG00000090173 | 20.231  | -5.288 | 1.257 | -4.206 | 2.6E-05 | 0.0001347  | Fbxw10        |
| ENSMUSG00000085095 | 3.133   | -5.292 | 2.181 | -2.426 | 1.5E-02 | 0.04541324 | Gm15635       |
| ENSMUSG00000041596 | 3.020   | -5.308 | 2.144 | -2.476 | 1.3E-02 | 0.04021173 | Nlrp5-ps      |
| ENSMUSG00000071392 | 6.207   | -5.320 | 1.714 | -3.103 | 1.9E-03 | 0.00718507 | Ect2l         |
| ENSMUSG00000089783 | 2.924   | -5.323 | 2.210 | -2.409 | 1.6E-02 | 0.04729449 | Gm454         |
| ENSMUSG00000091670 | 4.299   | -5.336 | 2.113 | -2.525 | 1.2E-02 | 0.03555684 | Vmn2r105      |
| ENSMUSG00000030344 | 6.812   | -5.443 | 2.084 | -2.611 | 9.0E-03 | 0.02855973 | Akap3         |
| ENSMUSG00000079164 | 68.233  | -5.459 | 1.037 | -5.266 | 1.4E-07 | 9.8258E-07 | Tlr5          |
| ENSMUSG00000029419 | 14.560  | -5.473 | 2.000 | -2.736 | 6.2E-03 | 0.020652   | Ajm1          |
| ENSMUSG00000103901 | 6.275   | -5.508 | 2.104 | -2.618 | 8.9E-03 | 0.02816521 | Gm37499       |
| ENSMUSG00000032530 | 112.234 | -5.531 | 0.803 | -6.891 | 5.5E-12 | 5.8604E-11 | Lyzl4         |
| ENSMUSG00000045231 | 6.332   | -5.536 | 1.760 | -3.145 | 1.7E-03 | 0.00631719 | BC106179      |
| ENSMUSG00000018865 | 11.112  | -5.538 | 2.044 | -2.709 | 6.8E-03 | 0.02223012 | Sult4a1       |
| ENSMUSG00000105893 | 7.234   | -5.565 | 2.058 | -2.705 | 6.8E-03 | 0.02247743 | Wdr46-ps      |
| ENSMUSG00000021032 | 7.687   | -5.606 | 2.038 | -2.750 | 6.0E-03 | 0.01989787 | Ngb           |
| ENSMUSG00000041729 | 48.320  | -5.619 | 1.220 | -4.606 | 4.1E-06 | 2.3948E-05 | Coro2b        |
| ENSMUSG00000038415 | 14.046  | -5.622 | 1.989 | -2.827 | 4.7E-03 | 0.0161766  | Foxq1         |
| ENSMUSG00000117916 | 5.320   | -5.628 | 2.262 | -2.488 | 1.3E-02 | 0.03902536 | 9630028I04Rik |

|                    |        |        |       |        |         |            |               |
|--------------------|--------|--------|-------|--------|---------|------------|---------------|
| ENSMUSG00000097120 | 5.781  | -5.668 | 1.968 | -2.881 | 4.0E-03 | 0.0138457  | Gm26887       |
| ENSMUSG00000117361 | 4.152  | -5.702 | 1.984 | -2.873 | 4.1E-03 | 0.01415369 | Gm30984       |
| ENSMUSG00000060314 | 8.657  | -5.748 | 2.207 | -2.605 | 9.2E-03 | 0.02902392 | Zfp941        |
| ENSMUSG00000097129 | 7.846  | -5.765 | 2.007 | -2.872 | 4.1E-03 | 0.01420783 | 4930507D05Rik |
| ENSMUSG00000020990 | 6.885  | -5.866 | 2.252 | -2.605 | 9.2E-03 | 0.02905602 | Cdk11         |
| ENSMUSG00000104554 | 7.371  | -5.876 | 1.918 | -3.064 | 2.2E-03 | 0.00809886 | Gm4610        |
| ENSMUSG00000108141 | 5.328  | -5.884 | 1.869 | -3.149 | 1.6E-03 | 0.0062392  | Gm44079       |
| ENSMUSG00000106888 | 4.193  | -5.923 | 2.001 | -2.960 | 3.1E-03 | 0.01105086 | Gm42848       |
| ENSMUSG00000027004 | 12.052 | -5.954 | 2.428 | -2.453 | 1.4E-02 | 0.0425162  | Frzb          |
| ENSMUSG00000097730 | 5.530  | -5.966 | 2.233 | -2.672 | 7.5E-03 | 0.02446984 | Gm26588       |
| ENSMUSG00000072618 | 8.930  | -6.004 | 2.114 | -2.840 | 4.5E-03 | 0.01556607 | Gm10384       |
| ENSMUSG00000042826 | 7.769  | -6.194 | 2.164 | -2.862 | 4.2E-03 | 0.01461222 | Fgf11         |
| ENSMUSG00000053049 | 7.990  | -6.253 | 1.743 | -3.588 | 3.3E-04 | 0.00144595 | Gm15413       |
| ENSMUSG00000076823 | 11.250 | -6.255 | 1.908 | -3.278 | 1.0E-03 | 0.00412676 | Trav13n-4     |
| ENSMUSG00000109559 | 8.136  | -6.291 | 2.103 | -2.991 | 2.8E-03 | 0.01009814 | Gm34280       |
| ENSMUSG00000071604 | 9.063  | -6.304 | 1.898 | -3.321 | 9.0E-04 | 0.00358661 | Fam189a2      |
| ENSMUSG00000044006 | 9.686  | -6.311 | 2.444 | -2.583 | 9.8E-03 | 0.03068932 | Cilp2         |
| ENSMUSG00000108520 | 8.279  | -6.336 | 2.127 | -2.978 | 2.9E-03 | 0.01046898 | Gm44684       |
| ENSMUSG00000113216 | 11.211 | -6.485 | 1.843 | -3.518 | 4.3E-04 | 0.00184176 | Gm40841       |
| ENSMUSG00000053181 | 16.104 | -6.517 | 1.755 | -3.714 | 2.0E-04 | 0.00092113 | A830005F24Rik |
| ENSMUSG00000104253 | 15.025 | -6.550 | 1.880 | -3.484 | 4.9E-04 | 0.00207016 | Gm37174       |
| ENSMUSG00000074217 | 67.788 | -6.551 | 1.177 | -5.566 | 2.6E-08 | 1.9853E-07 | Misp3         |
| ENSMUSG00000040875 | 12.169 | -6.652 | 1.865 | -3.567 | 3.6E-04 | 0.00155769 | Osbp110       |
| ENSMUSG00000040170 | 18.057 | -6.672 | 1.942 | -3.436 | 5.9E-04 | 0.00244288 | Fmo2          |
| ENSMUSG00000035283 | 13.681 | -6.694 | 2.078 | -3.222 | 1.3E-03 | 0.00495858 | Adrb1         |
| ENSMUSG00000036853 | 11.637 | -6.715 | 2.109 | -3.184 | 1.5E-03 | 0.0055995  | Mcoln3        |
| ENSMUSG00000115919 | 7.385  | -6.755 | 2.039 | -3.312 | 9.3E-04 | 0.00369152 | Gm31583       |
| ENSMUSG00000111583 | 14.929 | -6.870 | 1.715 | -4.006 | 6.2E-05 | 0.00030453 | Gm47962       |
| ENSMUSG00000111171 | 13.190 | -6.896 | 1.824 | -3.781 | 1.6E-04 | 0.00071831 | Gm47815       |
| ENSMUSG00000038026 | 13.902 | -6.936 | 1.958 | -3.543 | 4.0E-04 | 0.00169423 | Kcnj9         |
| ENSMUSG00000018570 | 21.296 | -6.945 | 1.988 | -3.494 | 4.8E-04 | 0.0020007  | 2810408A11Rik |
| ENSMUSG00000023439 | 12.834 | -6.955 | 1.555 | -4.473 | 7.7E-06 | 4.3545E-05 | Gnb3          |
| ENSMUSG00000097773 | 8.488  | -6.963 | 2.042 | -3.411 | 6.5E-04 | 0.00265844 | Gm10614       |
| ENSMUSG00000038663 | 26.430 | -6.974 | 1.952 | -3.574 | 3.5E-04 | 0.00152129 | Fsd2          |
| ENSMUSG00000021469 | 12.554 | -7.048 | 2.235 | -3.153 | 1.6E-03 | 0.00615435 | Msx2          |
| ENSMUSG00000054013 | 21.330 | -7.083 | 1.689 | -4.195 | 2.7E-05 | 0.00014133 | Tmem179       |
| ENSMUSG00000033316 | 75.455 | -7.105 | 1.212 | -5.862 | 4.6E-09 | 3.7852E-08 | Galnt9        |
| ENSMUSG00000104344 | 18.892 | -7.176 | 1.631 | -4.400 | 1.1E-05 | 5.953E-05  | Gm38077       |
| ENSMUSG00000108624 | 15.685 | -7.217 | 1.738 | -4.152 | 3.3E-05 | 0.00016815 | Gm45091       |
| ENSMUSG00000085006 | 15.629 | -7.324 | 1.562 | -4.689 | 2.7E-06 | 1.6425E-05 | BC021767      |
| ENSMUSG00000049097 | 20.858 | -7.332 | 1.708 | -4.292 | 1.8E-05 | 9.4332E-05 | Ankrd34a      |
| ENSMUSG00000109600 | 13.401 | -7.378 | 1.842 | -4.005 | 6.2E-05 | 0.00030482 | Gm18212       |
| ENSMUSG00000034968 | 16.538 | -7.490 | 1.793 | -4.177 | 3.0E-05 | 0.00015183 | Lbx2          |
| ENSMUSG00000032135 | 47.431 | -7.522 | 1.737 | -4.329 | 1.5E-05 | 8.0606E-05 | Mcam          |
| ENSMUSG00000097832 | 53.684 | -7.533 | 1.501 | -5.020 | 5.2E-07 | 3.3545E-06 | Gm26912       |
| ENSMUSG00000026303 | 16.375 | -7.757 | 1.789 | -4.336 | 1.5E-05 | 7.8372E-05 | Mlph          |
| ENSMUSG00000030865 | 32.395 | -7.956 | 2.136 | -3.724 | 2.0E-04 | 0.00088675 | Chp2          |
| ENSMUSG00000102697 | 29.950 | -8.103 | 1.815 | -4.466 | 8.0E-06 | 4.4887E-05 | Pcdhac2       |

**Table S4. DE genes FDR<0.05 Octanal vs Control BMDMs**

| <b>Accession</b>   | <b>baseMean</b> | <b>log2FC</b> | <b>lfcSE</b> | <b>stat</b> | <b>pvalue</b> | <b>padj</b> | <b>Gene name</b> |
|--------------------|-----------------|---------------|--------------|-------------|---------------|-------------|------------------|
| ENSMUSG00000021098 | 6.549           | -5.892        | 1.563        | -3.770      | 0.0001634798  | 0.02981124  | 4930447C04Rik    |
| ENSMUSG00000055523 | 22.911          | -5.711        | 1.556        | -3.670      | 0.0002423676  | 0.03704427  | Gucy2g           |
| ENSMUSG00000107109 | 16.094          | -5.698        | 1.532        | -3.719      | 0.0001997340  | 0.03322853  | Gm42571          |
| ENSMUSG00000031551 | 158.577         | -5.424        | 1.409        | -3.850      | 0.0001182335  | 0.02470959  | Ido1             |
| ENSMUSG00000020020 | 21.696          | -5.189        | 1.409        | -3.682      | 0.0002316855  | 0.03589272  | Usp44            |
| ENSMUSG00000005364 | 45.790          | -5.188        | 1.303        | -3.980      | 0.0000689376  | 0.01721844  | Il5ra            |
| ENSMUSG00000118495 | 63.201          | -4.950        | 1.371        | -3.611      | 0.0003051001  | 0.04175894  | Gm21011          |
| ENSMUSG00000063975 | 20.972          | -4.230        | 1.200        | -3.526      | 0.0004211749  | 0.04971194  | Slco1a5          |
| ENSMUSG00000048480 | 19.768          | -3.188        | 0.877        | -3.635      | 0.0002783855  | 0.03959453  | Cxcr1            |
| ENSMUSG00000044707 | 67.274          | -2.316        | 0.538        | -4.303      | 0.0000168597  | 0.00651518  | Cenjl            |
| ENSMUSG00000024617 | 40.482          | -2.307        | 0.565        | -4.084      | 0.0000442112  | 0.01263015  | Camk2a           |
| ENSMUSG00000057722 | 42.859          | -1.984        | 0.502        | -3.949      | 0.0000784542  | 0.01911513  | Lepr             |
| ENSMUSG00000022240 | 89.054          | -1.894        | 0.426        | -4.448      | 0.0000086704  | 0.00412971  | Ctnnd2           |
| ENSMUSG00000006462 | 51.592          | -1.860        | 0.467        | -3.986      | 0.0000672607  | 0.01709969  | A530013C23Rik    |
| ENSMUSG00000097275 | 39.143          | -1.833        | 0.497        | -3.692      | 0.0002227854  | 0.03483105  | Gm26648          |
| ENSMUSG00000103851 | 64.784          | -1.606        | 0.399        | -4.025      | 0.0000570829  | 0.01538310  | Gm37606          |
| ENSMUSG00000074766 | 95.323          | -1.586        | 0.449        | -3.536      | 0.0004062869  | 0.04896262  | Ism1             |
| ENSMUSG00000053846 | 5792.228        | -1.586        | 0.427        | -3.717      | 0.0002018646  | 0.03322853  | Lipg             |
| ENSMUSG00000052013 | 64.958          | -1.586        | 0.450        | -3.524      | 0.0004251122  | 0.04971194  | Btla             |
| ENSMUSG00000103313 | 103.180         | -1.543        | 0.333        | -4.628      | 0.0000036898  | 0.00193770  | Gm38357          |
| ENSMUSG00000106194 | 56.037          | -1.536        | 0.390        | -3.939      | 0.0000818080  | 0.01911513  | Gm43569          |
| ENSMUSG00000020155 | 102.008         | -1.360        | 0.310        | -4.385      | 0.0000115802  | 0.00506417  | Kenmb1           |
| ENSMUSG00000021822 | 5087.288        | -1.176        | 0.193        | -6.105      | 0.0000000010  | 0.00000287  | Plau             |
| ENSMUSG00000070348 | 3521.212        | -1.106        | 0.201        | -5.504      | 0.0000000371  | 0.00005064  | Ccnd1            |
| ENSMUSG00000014329 | 311.063         | -1.092        | 0.195        | -5.612      | 0.0000000200  | 0.00002928  | Bicc1            |
| ENSMUSG00000087201 | 238.917         | -1.077        | 0.248        | -4.337      | 0.0000144637  | 0.00604554  | Gm15261          |
| ENSMUSG00000117239 | 314.900         | -1.055        | 0.275        | -3.837      | 0.0001245511  | 0.02559138  | Gpr31c           |
| ENSMUSG00000029108 | 468.651         | -1.042        | 0.273        | -3.814      | 0.0001364632  | 0.02687407  | Pcdh7            |
| ENSMUSG00000090386 | 448.428         | -1.027        | 0.237        | -4.325      | 0.0000152485  | 0.00624609  | Mir99ahg         |
| ENSMUSG00000063838 | 252.817         | -0.976        | 0.255        | -3.827      | 0.0001297756  | 0.02605817  | Cdc42ep5         |
| ENSMUSG00000106472 | 227.019         | -0.938        | 0.259        | -3.627      | 0.0002864940  | 0.04046678  | Gm43111          |
| ENSMUSG00000051177 | 333.522         | -0.888        | 0.245        | -3.625      | 0.0002890021  | 0.04054146  | Plcb1            |
| ENSMUSG00000042842 | 424.030         | -0.865        | 0.230        | -3.765      | 0.0001663854  | 0.02989246  | Serpib6b         |
| ENSMUSG00000001763 | 385.570         | -0.799        | 0.211        | -3.779      | 0.0001577338  | 0.02963803  | Tspan33          |
| ENSMUSG00000059588 | 2558.036        | -0.794        | 0.141        | -5.641      | 0.0000000169  | 0.00002664  | Calcr1           |
| ENSMUSG00000031626 | 295.801         | -0.771        | 0.204        | -3.769      | 0.0001642283  | 0.02981124  | Sorbs2           |
| ENSMUSG00000030147 | 271.546         | -0.760        | 0.213        | -3.569      | 0.0003587417  | 0.04454089  | Clec4b1          |
| ENSMUSG00000000440 | 1488.770        | -0.711        | 0.145        | -4.899      | 0.0000009632  | 0.00075871  | Pparg            |
| ENSMUSG00000030102 | 1133.754        | -0.710        | 0.149        | -4.761      | 0.0000019238  | 0.00115886  | Itpr1            |
| ENSMUSG00000027030 | 647.443         | -0.698        | 0.168        | -4.145      | 0.0000339678  | 0.01140481  | Stk39            |
| ENSMUSG00000026748 | 1886.045        | -0.689        | 0.143        | -4.806      | 0.0000015431  | 0.00098763  | Plxdc2           |
| ENSMUSG00000021253 | 587.315         | -0.654        | 0.177        | -3.700      | 0.0002151802  | 0.03458208  | Tgfb3            |
| ENSMUSG00000054342 | 6320.940        | -0.649        | 0.164        | -3.945      | 0.0000797306  | 0.01911513  | Kenn4            |
| ENSMUSG00000049103 | 5049.022        | -0.648        | 0.175        | -3.696      | 0.0002187440  | 0.03458208  | Ccr2             |
| ENSMUSG00000022322 | 595.578         | -0.641        | 0.167        | -3.834      | 0.0001262013  | 0.02559138  | Shcbp1           |
| ENSMUSG00000036452 | 796.549         | -0.639        | 0.131        | -4.891      | 0.0000010053  | 0.00076258  | Arhgap26         |
| ENSMUSG00000027111 | 4593.789        | -0.623        | 0.149        | -4.194      | 0.0000273484  | 0.00962518  | Itga6            |
| ENSMUSG00000018927 | 52162.599       | -0.612        | 0.137        | -4.464      | 0.0000080557  | 0.00392828  | Ccl6             |
| ENSMUSG00000026548 | 3308.031        | -0.601        | 0.161        | -3.727      | 0.0001934376  | 0.03247373  | Slamf9           |

|                    |           |        |       |        |              |            |               |
|--------------------|-----------|--------|-------|--------|--------------|------------|---------------|
| ENSMUSG00000037868 | 1385.818  | -0.595 | 0.164 | -3.618 | 0.0002963358 | 0.04100847 | Egr2          |
| ENSMUSG00000040274 | 6796.320  | -0.590 | 0.102 | -5.788 | 0.0000000071 | 0.00001325 | Cdk6          |
| ENSMUSG00000029254 | 1942.715  | -0.565 | 0.151 | -3.752 | 0.0001752442 | 0.03085729 | Stap1         |
| ENSMUSG00000039109 | 20787.263 | -0.550 | 0.151 | -3.646 | 0.0002664760 | 0.03884627 | F13a1         |
| ENSMUSG00000021701 | 9710.219  | -0.540 | 0.109 | -4.963 | 0.0000006940 | 0.00064180 | Plk2          |
| ENSMUSG00000090958 | 3322.777  | -0.524 | 0.108 | -4.846 | 0.0000012587 | 0.00085930 | Lrrc32        |
| ENSMUSG00000053318 | 10221.974 | -0.515 | 0.143 | -3.600 | 0.0003178762 | 0.04236109 | Slamf8        |
| ENSMUSG00000055435 | 19662.138 | -0.472 | 0.123 | -3.834 | 0.0001258850 | 0.02559138 | Maf           |
| ENSMUSG00000002870 | 3202.845  | -0.466 | 0.101 | -4.639 | 0.0000034979 | 0.00193621 | Mcm2          |
| ENSMUSG00000001270 | 10332.842 | -0.463 | 0.113 | -4.113 | 0.0000390406 | 0.01251393 | Ckb           |
| ENSMUSG00000001870 | 3713.255  | -0.463 | 0.091 | -5.109 | 0.0000003232 | 0.00035459 | Ltbp1         |
| ENSMUSG00000021374 | 1389.903  | -0.454 | 0.120 | -3.800 | 0.0001446227 | 0.02781423 | Nup153        |
| ENSMUSG00000030067 | 7134.524  | -0.451 | 0.106 | -4.274 | 0.0000192077 | 0.00708828 | Foxp1         |
| ENSMUSG00000027435 | 19859.925 | -0.439 | 0.122 | -3.607 | 0.0003098935 | 0.04203264 | Cd93          |
| ENSMUSG00000052760 | 1677.720  | -0.425 | 0.119 | -3.571 | 0.0003551369 | 0.04454089 | A630001G21Rik |
| ENSMUSG00000030560 | #####     | -0.424 | 0.118 | -3.600 | 0.0003187799 | 0.04236109 | Ctsc          |
| ENSMUSG00000089809 | 3744.223  | -0.417 | 0.110 | -3.800 | 0.0001445820 | 0.02781423 | Rasgeflb      |
| ENSMUSG00000000693 | 6206.560  | -0.400 | 0.111 | -3.598 | 0.0003205883 | 0.04236109 | Loxl3         |
| ENSMUSG00000032788 | 5907.520  | -0.378 | 0.098 | -3.866 | 0.0001106481 | 0.02360609 | Pdxk          |
| ENSMUSG00000066026 | 22994.025 | -0.373 | 0.091 | -4.083 | 0.0000444007 | 0.01263015 | Dhrs3         |
| ENSMUSG00000021998 | 72406.879 | -0.363 | 0.083 | -4.374 | 0.0000122045 | 0.00520752 | Lcp1          |
| ENSMUSG00000024659 | 50153.485 | -0.360 | 0.083 | -4.321 | 0.0000155625 | 0.00624971 | Anxa1         |
| ENSMUSG00000019838 | 11063.525 | -0.346 | 0.097 | -3.560 | 0.0003705353 | 0.04571647 | Slc16a10      |
| ENSMUSG00000035754 | 5274.809  | -0.344 | 0.084 | -4.089 | 0.0000432406 | 0.01263015 | Wdr18         |
| ENSMUSG00000028136 | 4388.218  | -0.327 | 0.083 | -3.942 | 0.0000807563 | 0.01911513 | Snx27         |
| ENSMUSG00000028788 | 15342.734 | -0.325 | 0.080 | -4.084 | 0.0000443225 | 0.01263015 | Ptp4a2        |
| ENSMUSG00000020661 | 6419.041  | -0.310 | 0.085 | -3.643 | 0.0002690162 | 0.03884627 | Dnmt3a        |
| ENSMUSG00000027230 | 3044.169  | -0.307 | 0.085 | -3.623 | 0.0002917552 | 0.04064924 | Creb3l1       |
| ENSMUSG00000031352 | 2355.512  | -0.304 | 0.080 | -3.795 | 0.0001473468 | 0.02794268 | Hccs          |
| ENSMUSG00000028656 | 28693.347 | -0.300 | 0.072 | -4.146 | 0.0000337597 | 0.01140481 | Cap1          |
| ENSMUSG00000029580 | #####     | -0.300 | 0.076 | -3.928 | 0.0000854977 | 0.01945642 | Actb          |
| ENSMUSG00000028273 | 2816.003  | -0.275 | 0.073 | -3.750 | 0.0001769716 | 0.03085729 | Pdlim5        |
| ENSMUSG00000038733 | 5542.536  | -0.269 | 0.069 | -3.908 | 0.0000932331 | 0.02075551 | Wdr26         |
| ENSMUSG00000024165 | 3803.416  | -0.261 | 0.071 | -3.664 | 0.0002485982 | 0.03743780 | Jpt2          |
| ENSMUSG00000054766 | 11840.502 | -0.261 | 0.070 | -3.753 | 0.0001744513 | 0.03085729 | Set           |
| ENSMUSG00000028161 | 9159.981  | -0.255 | 0.071 | -3.585 | 0.0003374696 | 0.04292991 | Ppp3ca        |
| ENSMUSG00000005732 | 5637.609  | -0.245 | 0.067 | -3.648 | 0.0002639978 | 0.03884627 | Ranbp1        |
| ENSMUSG00000032231 | 71776.265 | -0.210 | 0.057 | -3.695 | 0.0002195044 | 0.03458208 | Anxa2         |
| ENSMUSG00000033379 | 38195.975 | 0.176  | 0.049 | 3.585  | 0.0003365818 | 0.04292991 | Atp6v0b       |
| ENSMUSG00000016308 | 5986.306  | 0.186  | 0.051 | 3.680  | 0.0002330810 | 0.03589272 | Ube2a         |
| ENSMUSG00000039067 | 11193.352 | 0.203  | 0.053 | 3.799  | 0.0001453114 | 0.02781423 | Psmc7         |
| ENSMUSG00000003380 | 7886.409  | 0.221  | 0.061 | 3.610  | 0.0003058367 | 0.04175894 | Rabac1        |
| ENSMUSG00000035521 | 2063.469  | 0.224  | 0.060 | 3.730  | 0.0001917941 | 0.03246393 | Gnptg         |
| ENSMUSG00000004789 | 3580.989  | 0.225  | 0.064 | 3.523  | 0.0004271911 | 0.04971194 | Dlst          |
| ENSMUSG00000023944 | 62291.596 | 0.238  | 0.060 | 3.938  | 0.0000822515 | 0.01911513 | Hsp90ab1      |
| ENSMUSG00000022831 | 25391.078 | 0.245  | 0.063 | 3.869  | 0.0001094704 | 0.02360066 | Hcls1         |
| ENSMUSG00000045438 | 1908.570  | 0.248  | 0.069 | 3.602  | 0.0003157279 | 0.04236109 | Cox19         |
| ENSMUSG00000006373 | 5035.403  | 0.264  | 0.074 | 3.576  | 0.0003486728 | 0.04408128 | Pgrmc1        |
| ENSMUSG00000038312 | 6864.761  | 0.265  | 0.063 | 4.195  | 0.0000272299 | 0.00962518 | Edem2         |
| ENSMUSG00000023913 | 37295.655 | 0.268  | 0.067 | 4.010  | 0.0000608291 | 0.01582461 | Pla2g7        |
| ENSMUSG00000039745 | 4846.685  | 0.270  | 0.067 | 4.047  | 0.0000518921 | 0.01436218 | Htatip2       |
| ENSMUSG00000058672 | 8875.830  | 0.270  | 0.075 | 3.589  | 0.0003319539 | 0.04292991 | Tubb2a        |

|                    |           |       |       |       |              |            |               |
|--------------------|-----------|-------|-------|-------|--------------|------------|---------------|
| ENSMUSG00000028057 | 4455.088  | 0.271 | 0.072 | 3.768 | 0.0001644778 | 0.02981124 | Rit1          |
| ENSMUSG00000016495 | 3708.436  | 0.272 | 0.073 | 3.708 | 0.0002090507 | 0.03398069 | Plgrkt        |
| ENSMUSG00000040713 | 70181.604 | 0.273 | 0.069 | 3.969 | 0.0000721889 | 0.01781326 | Creg1         |
| ENSMUSG00000043091 | 16269.018 | 0.279 | 0.072 | 3.878 | 0.0001054403 | 0.02297364 | Tuba1c        |
| ENSMUSG00000031400 | 11945.902 | 0.287 | 0.070 | 4.099 | 0.0000414700 | 0.01251393 | G6pdx         |
| ENSMUSG00000004221 | 6277.698  | 0.289 | 0.078 | 3.716 | 0.0002028010 | 0.03322853 | Ikbkg         |
| ENSMUSG00000031584 | 44654.238 | 0.290 | 0.080 | 3.643 | 0.0002697556 | 0.03884627 | Gsr           |
| ENSMUSG00000024758 | 13028.001 | 0.301 | 0.070 | 4.313 | 0.0000160770 | 0.00633217 | Rtn3          |
| ENSMUSG00000021996 | 76234.603 | 0.305 | 0.060 | 5.106 | 0.0000003289 | 0.00035459 | Esd           |
| ENSMUSG00000040466 | 37125.922 | 0.305 | 0.086 | 3.536 | 0.0004064081 | 0.04896262 | Blvrb         |
| ENSMUSG00000028599 | 97083.674 | 0.316 | 0.088 | 3.569 | 0.0003588324 | 0.04454089 | Tnfrsflb      |
| ENSMUSG00000020733 | 9405.210  | 0.325 | 0.092 | 3.545 | 0.0003924666 | 0.04796189 | Slc9a3r1      |
| ENSMUSG00000050088 | 2882.104  | 0.328 | 0.084 | 3.909 | 0.0000927258 | 0.02075551 | 1600012H06Rik |
| ENSMUSG00000090124 | 1776.483  | 0.344 | 0.084 | 4.099 | 0.0000415481 | 0.01251393 | Ugt1a7c       |
| ENSMUSG00000038418 | 7614.179  | 0.347 | 0.090 | 3.850 | 0.0001179894 | 0.02470959 | Egr1          |
| ENSMUSG00000025503 | 51625.430 | 0.349 | 0.071 | 4.947 | 0.0000007521 | 0.00064180 | Taldo1        |
| ENSMUSG00000034266 | 3567.240  | 0.356 | 0.087 | 4.065 | 0.0000481327 | 0.01350418 | Batf          |
| ENSMUSG00000030763 | 919.100   | 0.368 | 0.098 | 3.748 | 0.0001783938 | 0.03085729 | Lcmt1         |
| ENSMUSG00000008540 | 11115.295 | 0.370 | 0.080 | 4.631 | 0.0000036433 | 0.00193770 | Mgst1         |
| ENSMUSG00000040152 | 49909.819 | 0.385 | 0.105 | 3.666 | 0.0002461441 | 0.03734279 | Thbs1         |
| ENSMUSG00000023048 | 26651.619 | 0.389 | 0.068 | 5.732 | 0.0000000099 | 0.00001692 | Prr13         |
| ENSMUSG00000025993 | 26585.003 | 0.396 | 0.097 | 4.100 | 0.0000413512 | 0.01251393 | Slc40a1       |
| ENSMUSG00000028691 | #####     | 0.428 | 0.104 | 4.110 | 0.0000394844 | 0.01251393 | Prdx1         |
| ENSMUSG00000037820 | 31176.575 | 0.429 | 0.074 | 5.815 | 0.0000000061 | 0.00001243 | Tgm2          |
| ENSMUSG00000003541 | 15812.368 | 0.429 | 0.104 | 4.108 | 0.0000399008 | 0.01251393 | Ier3          |
| ENSMUSG00000022564 | 27620.174 | 0.435 | 0.089 | 4.870 | 0.0000011188 | 0.00081834 | Grina         |
| ENSMUSG00000021281 | 24679.710 | 0.437 | 0.091 | 4.823 | 0.0000014135 | 0.00093386 | Tnfaip2       |
| ENSMUSG00000071547 | 6862.591  | 0.440 | 0.090 | 4.863 | 0.0000011588 | 0.00081839 | Nt5dc2        |
| ENSMUSG00000048164 | 1126.290  | 0.446 | 0.111 | 4.031 | 0.0000555578 | 0.01517172 | Gm7204        |
| ENSMUSG00000036752 | 8614.935  | 0.455 | 0.096 | 4.743 | 0.0000021087 | 0.00123393 | Tubb4b        |
| ENSMUSG00000023349 | 48874.956 | 0.475 | 0.103 | 4.611 | 0.0000039994 | 0.00204777 | Clec4n        |
| ENSMUSG00000028961 | 50426.660 | 0.475 | 0.092 | 5.189 | 0.0000002115 | 0.00025487 | Pgd           |
| ENSMUSG00000042507 | 970.492   | 0.480 | 0.136 | 3.523 | 0.0004266120 | 0.04971194 | Mideas        |
| ENSMUSG00000035765 | 1338.666  | 0.485 | 0.127 | 3.815 | 0.0001363398 | 0.02687407 | Dym           |
| ENSMUSG00000028756 | 3613.068  | 0.488 | 0.125 | 3.902 | 0.0000954352 | 0.02101729 | Pink1         |
| ENSMUSG00000030144 | 42884.408 | 0.492 | 0.106 | 4.663 | 0.0000031193 | 0.00177460 | Clec4d        |
| ENSMUSG00000026701 | 31080.476 | 0.509 | 0.081 | 6.263 | 0.0000000004 | 0.00000193 | Prdx6         |
| ENSMUSG00000058135 | 10400.909 | 0.515 | 0.108 | 4.777 | 0.0000017775 | 0.00110320 | Gstm1         |
| ENSMUSG00000032802 | 25245.327 | 0.519 | 0.143 | 3.641 | 0.0002712278 | 0.03884627 | Srxn1         |
| ENSMUSG00000020363 | 1421.833  | 0.538 | 0.150 | 3.592 | 0.0003284611 | 0.04292991 | Gfpt2         |
| ENSMUSG00000024661 | #####     | 0.540 | 0.087 | 6.197 | 0.0000000006 | 0.00000236 | Fth1          |
| ENSMUSG00000071714 | 9581.203  | 0.544 | 0.121 | 4.489 | 0.0000071546 | 0.00357396 | Csf2rb2       |
| ENSMUSG00000024646 | 15093.815 | 0.545 | 0.110 | 4.947 | 0.0000007518 | 0.00064180 | Cyb5a         |
| ENSMUSG00000109706 | 273.714   | 0.551 | 0.133 | 4.140 | 0.0000346720 | 0.01145350 | Fth-ps3       |
| ENSMUSG00000027332 | 1830.129  | 0.551 | 0.091 | 6.091 | 0.0000000011 | 0.00000287 | Ivd           |
| ENSMUSG00000071713 | 15426.993 | 0.567 | 0.113 | 5.024 | 0.0000005068 | 0.00050318 | Csf2rb        |
| ENSMUSG00000033917 | 6049.525  | 0.569 | 0.087 | 6.554 | 0.0000000001 | 0.00000038 | Gde1          |
| ENSMUSG00000074063 | 2447.628  | 0.586 | 0.156 | 3.768 | 0.0001643482 | 0.02981124 | Osgin1        |
| ENSMUSG00000022947 | 996.962   | 0.593 | 0.168 | 3.528 | 0.0004186363 | 0.04971194 | Cbr3          |
| ENSMUSG00000020334 | 782.927   | 0.607 | 0.138 | 4.385 | 0.0000116213 | 0.00506417 | Slc22a4       |
| ENSMUSG00000020250 | 24104.082 | 0.626 | 0.118 | 5.287 | 0.0000001243 | 0.00015907 | Txnrd1        |
| ENSMUSG00000026923 | 4312.536  | 0.632 | 0.129 | 4.915 | 0.0000008901 | 0.00072919 | Notch1        |



|                    |           |       |       |       |              |            |               |
|--------------------|-----------|-------|-------|-------|--------------|------------|---------------|
| ENSMUSG00000031934 | 2631.347  | 0.673 | 0.109 | 6.157 | 0.0000000007 | 0.00000254 | Panx1         |
| ENSMUSG00000027611 | 16356.862 | 0.687 | 0.160 | 4.296 | 0.0000174128 | 0.00660429 | Procr         |
| ENSMUSG00000031379 | 342.707   | 0.742 | 0.207 | 3.586 | 0.0003363133 | 0.04292991 | Pir           |
| ENSMUSG00000028124 | 35747.718 | 0.748 | 0.097 | 7.732 | 0.0000000000 | 0.00000000 | Gelm          |
| ENSMUSG00000000730 | 588.677   | 0.768 | 0.205 | 3.747 | 0.0001792890 | 0.03085729 | Dnmt3l        |
| ENSMUSG00000027737 | 12844.707 | 0.794 | 0.158 | 5.020 | 0.0000005159 | 0.00050318 | Slc7a11       |
| ENSMUSG00000027605 | 932.091   | 0.821 | 0.196 | 4.191 | 0.0000277274 | 0.00962518 | Acsc2         |
| ENSMUSG00000026829 | 605.365   | 0.846 | 0.215 | 3.935 | 0.0000830646 | 0.01911513 | Gbgt1         |
| ENSMUSG00000048911 | 369.138   | 0.870 | 0.238 | 3.661 | 0.0002514104 | 0.03758493 | Rnf24         |
| ENSMUSG00000003849 | 1658.025  | 0.874 | 0.234 | 3.736 | 0.0001872509 | 0.03195904 | Nqo1          |
| ENSMUSG00000028378 | 2777.430  | 0.922 | 0.155 | 5.929 | 0.0000000030 | 0.00000693 | Ptgr1         |
| ENSMUSG00000093765 | 511.789   | 0.931 | 0.234 | 3.984 | 0.0000676273 | 0.01709969 | Gm20658       |
| ENSMUSG00000028602 | 661.882   | 0.991 | 0.224 | 4.415 | 0.0000100930 | 0.00469808 | Tnfrsf8       |
| ENSMUSG00000005413 | #####     | 1.001 | 0.118 | 8.508 | 0.0000000000 | 0.00000000 | Hmox1         |
| ENSMUSG00000034771 | 149.952   | 1.225 | 0.347 | 3.524 | 0.0004243384 | 0.04971194 | Tle2          |
| ENSMUSG00000115946 | 133.888   | 1.316 | 0.328 | 4.009 | 0.0000610392 | 0.01582461 | Mirt2         |
| ENSMUSG00000033967 | 220.866   | 2.568 | 0.601 | 4.272 | 0.0000193811 | 0.00708828 | Rnf225        |
| ENSMUSG00000055833 | 13.927    | 3.268 | 0.911 | 3.587 | 0.0003343496 | 0.04292991 | 1700034H15Rik |
| ENSMUSG00000039200 | 10.241    | 3.771 | 1.033 | 3.650 | 0.0002622025 | 0.03884627 | Atf7ip2       |
| ENSMUSG00000043286 | 10.358    | 5.434 | 1.533 | 3.544 | 0.0003934182 | 0.04796189 | Pnpla1        |
| ENSMUSG00000073008 | 15.452    | 6.261 | 1.426 | 4.390 | 0.0000113528 | 0.00506417 | Gpr174        |
| ENSMUSG00000021278 | 8.203     | 6.411 | 1.733 | 3.699 | 0.0002164725 | 0.03458208 | Amn           |
| ENSMUSG00000020826 | 37203.302 | 6.571 | 1.636 | 4.017 | 0.0000590257 | 0.01570007 | Nos2          |

## References and Notes

1. L. Buck, R. Axel, A novel multigene family may encode odorant receptors: A molecular basis for odor recognition. *Cell* **65**, 175–187 (1991). [doi:10.1016/0092-8674\(91\)90418-X](https://doi.org/10.1016/0092-8674(91)90418-X) [Medline](#)
2. S. Rouquier, A. Blancher, D. Giorgi, The olfactory receptor gene repertoire in primates and mouse: Evidence for reduction of the functional fraction in primates. *Proc. Natl. Acad. Sci. U.S.A.* **97**, 2870–2874 (2000). [doi:10.1073/pnas.040580197](https://doi.org/10.1073/pnas.040580197) [Medline](#)
3. H. Saito, M. Kubota, R. W. Roberts, Q. Chi, H. Matsunami, RTP family members induce functional expression of mammalian odorant receptors. *Cell* **119**, 679–691 (2004). [doi:10.1016/j.cell.2004.11.021](https://doi.org/10.1016/j.cell.2004.11.021) [Medline](#)
4. F. Li, S. Ponissery-Saidu, K. K. Yee, H. Wang, M.-L. Chen, N. Iguchi, G. Zhang, P. Jiang, J. Reisert, L. Huang, Heterotrimeric G protein subunit Gy13 is critical to olfaction. *J. Neurosci.* **33**, 7975–7984 (2013). [doi:10.1523/JNEUROSCI.5563-12.2013](https://doi.org/10.1523/JNEUROSCI.5563-12.2013) [Medline](#)
5. C. S. Silva Teixeira, N. M. Cerqueira, A. C. Silva Ferreira, Unravelling the olfactory sense: From the gene to odor perception. *Chem. Senses* **41**, 105–121 (2016). [Medline](#)
6. G. Antunes, F. M. Simoes de Souza, Olfactory receptor signaling. *Methods Cell Biol.* **132**, 127–145 (2016). [doi:10.1016/bs.mcb.2015.11.003](https://doi.org/10.1016/bs.mcb.2015.11.003) [Medline](#)
7. I. Ferrer, P. Garcia-Esparcia, M. Carmona, E. Carro, E. Aronica, G. G. Kovacs, A. Grison, S. Gustincich, Olfactory receptors in non-chemosensory organs: The nervous system in health and disease. *Front. Aging Neurosci.* **8**, 163 (2016). [doi:10.3389/fnagi.2016.00163](https://doi.org/10.3389/fnagi.2016.00163) [Medline](#)
8. S. J. Lee, I. Depoortere, H. Hatt, Therapeutic potential of ectopic olfactory and taste receptors. *Nat. Rev. Drug Discov.* **18**, 116–138 (2019). [doi:10.1038/s41573-018-0002-3](https://doi.org/10.1038/s41573-018-0002-3) [Medline](#)
9. J. J. Li, H. L. Tay, M. Plank, A.-T. Essilfie, P. M. Hansbro, P. S. Foster, M. Yang, Activation of olfactory receptors on mouse pulmonary macrophages promotes monocyte chemotactic protein-1 production. *PLOS ONE* **8**, e80148 (2013). [doi:10.1371/journal.pone.0080148](https://doi.org/10.1371/journal.pone.0080148) [Medline](#)
10. C. Cochain, E. Vafadarnejad, P. Arampatzi, J. Pelisek, H. Winkels, K. Ley, D. Wolf, A.-E. Saliba, A. Zerneck, Single-cell RNA-seq reveals the transcriptional landscape and heterogeneity of aortic macrophages in murine atherosclerosis. *Circ. Res.* **122**, 1661–1674 (2018). [doi:10.1161/CIRCRESAHA.117.312509](https://doi.org/10.1161/CIRCRESAHA.117.312509) [Medline](#)
11. A. Zerneck, H. Winkels, C. Cochain, J. W. Williams, D. Wolf, O. Soehnlein, C. S. Robbins, C. Monaco, I. Park, C. A. McNamara, C. J. Binder, M. I. Cybulsky, C. A. Scipione, C. C. Hedrick, E. V. Galkina, T. Kyaw, Y. Ghosheh, H. Q. Dinh, K. Ley, Meta-analysis of leukocyte diversity in atherosclerotic mouse aortas. *Circ. Res.* **127**, 402–426 (2020). [doi:10.1161/CIRCRESAHA.120.316903](https://doi.org/10.1161/CIRCRESAHA.120.316903) [Medline](#)
12. S. McArdle, K. Buscher, Y. Ghosheh, A. B. Pramod, J. Miller, H. Winkels, D. Wolf, K. Ley, Migratory and dancing macrophage subsets in atherosclerotic lesions. *Circ. Res.* **125**, 1038–1051 (2019). [doi:10.1161/CIRCRESAHA.119.315175](https://doi.org/10.1161/CIRCRESAHA.119.315175) [Medline](#)

13. R. C. Araneda, Z. Peterlin, X. Zhang, A. Chesler, S. Firestein, A pharmacological profile of the aldehyde receptor repertoire in rat olfactory epithelium. *J. Physiol.* **555**, 743–756 (2004). [doi:10.1113/jphysiol.2003.058040](https://doi.org/10.1113/jphysiol.2003.058040) [Medline](#)
14. Y. Li, Z. Peterlin, J. Ho, T. Yarnitzky, M. T. Liu, M. Fichman, M. Y. Niv, H. Matsunami, S. Firestein, K. Ryan, Aldehyde recognition and discrimination by mammalian odorant receptors via functional group-specific hydration chemistry. *ACS Chem. Biol.* **9**, 2563–2571 (2014). [doi:10.1021/cb400290u](https://doi.org/10.1021/cb400290u) [Medline](#)
15. R. C. Araneda, A. D. Kini, S. Firestein, The molecular receptive range of an odorant receptor. *Nat. Neurosci.* **3**, 1248–1255 (2000). [doi:10.1038/81774](https://doi.org/10.1038/81774) [Medline](#)
16. W. B. Rizzo, Fatty aldehyde and fatty alcohol metabolism: Review and importance for epidermal structure and function. *Biochim. Biophys. Acta Mol. Cell Biol. Lipids* **1841**, 377–389 (2014). [doi:10.1016/j.bbalip.2013.09.001](https://doi.org/10.1016/j.bbalip.2013.09.001) [Medline](#)
17. S. Feil, B. Fehrenbacher, R. Lukowski, F. Essmann, K. Schulze-Osthoff, M. Schaller, R. Feil, Transdifferentiation of vascular smooth muscle cells to macrophage-like cells during atherogenesis. *Circ. Res.* **115**, 662–667 (2014). [doi:10.1161/CIRCRESAHA.115.304634](https://doi.org/10.1161/CIRCRESAHA.115.304634) [Medline](#)
18. M. R. Bennett, S. Sinha, G. K. Owens, Vascular smooth muscle cells in atherosclerosis. *Circ. Res.* **118**, 692–702 (2016). [doi:10.1161/CIRCRESAHA.115.306361](https://doi.org/10.1161/CIRCRESAHA.115.306361) [Medline](#)
19. T. Bozza, P. Feinstein, C. Zheng, P. Mombaerts, Odorant receptor expression defines functional units in the mouse olfactory system. *J. Neurosci.* **22**, 3033–3043 (2002). [doi:10.1523/JNEUROSCI.22-08-03033.2002](https://doi.org/10.1523/JNEUROSCI.22-08-03033.2002) [Medline](#)
20. L. Folkersen, J. Persson, J. Ekstrand, H. E. Agardh, G. K. Hansson, A. Gabrielsen, U. Hedin, G. Paulsson-Berne, Prediction of ischemic events on the basis of transcriptomic and genomic profiling in patients undergoing carotid endarterectomy. *Mol. Med.* **18**, 669–675 (2012). [doi:10.2119/molmed.2011.00479](https://doi.org/10.2119/molmed.2011.00479) [Medline](#)
21. Y. I. Miller, Toll-like receptors and atherosclerosis: Oxidized LDL as an endogenous Toll-like receptor ligand. *Future Cardiol.* **1**, 785–792 (2005). [doi:10.2217/14796678.1.6.785](https://doi.org/10.2217/14796678.1.6.785) [Medline](#)
22. V. Camarena, D. W. Sant, T. C. Huff, S. Mustafi, R. K. Muir, A. T. Aron, C. J. Chang, A. R. Renslo, P. V. Monje, G. Wang, cAMP signaling regulates DNA hydroxymethylation by augmenting the intracellular labile ferrous iron pool. *eLife* **6**, e29750 (2017). [doi:10.7554/eLife.29750](https://doi.org/10.7554/eLife.29750) [Medline](#)
23. J. R. Yaron, S. Gangaraju, M. Y. Rao, X. Kong, L. Zhang, F. Su, Y. Tian, H. L. Glenn, D. R. Meldrum, K<sup>+</sup> regulates Ca<sup>2+</sup> to drive inflammasome signaling: Dynamic visualization of ion flux in live cells. *Cell Death Dis.* **6**, e1954 (2015). [doi:10.1038/cddis.2015.277](https://doi.org/10.1038/cddis.2015.277) [Medline](#)
24. K. V. Swanson, M. Deng, J. P. Ting, The NLRP3 inflammasome: Molecular activation and regulation to therapeutics. *Nat. Rev. Immunol.* **19**, 477–489 (2019). [doi:10.1038/s41577-019-0165-0](https://doi.org/10.1038/s41577-019-0165-0) [Medline](#)

25. K. Tsuchiya, S. Hosojima, H. Hara, H. Kushiyama, M. R. Mahib, T. Kinoshita, T. Suda, Gasdermin D mediates the maturation and release of IL-1 $\alpha$  downstream of inflammasomes. *Cell Rep.* **34**, 108887 (2021). [doi:10.1016/j.celrep.2021.108887](https://doi.org/10.1016/j.celrep.2021.108887) [Medline](#)
26. R. C. Coll, A. A. B. Robertson, J. J. Chae, S. C. Higgins, R. Muñoz-Planillo, M. C. Inerra, I. Vetter, L. S. Dungan, B. G. Monks, A. Stutz, D. E. Croker, M. S. Butler, M. Haneklaus, C. E. Sutton, G. Núñez, E. Latz, D. L. Kastner, K. H. G. Mills, S. L. Masters, K. Schroder, M. A. Cooper, L. A. J. O'Neill, A small-molecule inhibitor of the NLRP3 inflammasome for the treatment of inflammatory diseases. *Nat. Med.* **21**, 248–255 (2015). [doi:10.1038/nm.3806](https://doi.org/10.1038/nm.3806) [Medline](#)
27. B. A. McKenzie, M. K. Mamik, L. B. Saito, R. Boghazian, M. C. Monaco, E. O. Major, J.-Q. Lu, W. G. Branton, C. Power, Caspase-1 inhibition prevents glial inflammasome activation and pyroptosis in models of multiple sclerosis. *Proc. Natl. Acad. Sci. U.S.A.* **115**, E6065–E6074 (2018). [doi:10.1073/pnas.1722041115](https://doi.org/10.1073/pnas.1722041115) [Medline](#)
28. J. J. Hu, X. Liu, S. Xia, Z. Zhang, Y. Zhang, J. Zhao, J. Ruan, X. Luo, X. Lou, Y. Bai, J. Wang, L. R. Hollingsworth, V. G. Magupalli, L. Zhao, H. R. Luo, J. Kim, J. Lieberman, H. Wu, FDA-approved disulfiram inhibits pyroptosis by blocking gasdermin D pore formation. *Nat. Immunol.* **21**, 736–745 (2020). [doi:10.1038/s41590-020-0669-6](https://doi.org/10.1038/s41590-020-0669-6) [Medline](#)
29. H. Esterbauer, G. Wäg, H. Puhl, Lipid peroxidation and its role in atherosclerosis. *Br. Med. Bull.* **49**, 566–576 (1993). [doi:10.1093/oxfordjournals.bmb.a072631](https://doi.org/10.1093/oxfordjournals.bmb.a072631) [Medline](#)
30. M. T. R. Morales, J. J. Rios, R. Aparicio, Changes in the volatile composition of virgin olive oil during oxidation: Flavors and off-flavors. *J. Agric. Food Chem.* **45**, 2666–2673 (1997). [doi:10.1021/jf960585+](https://doi.org/10.1021/jf960585+)
31. L. Xu, X. Yu, M. Li, J. Chen, X. Wang, Monitoring oxidative stability and changes in key volatile compounds in edible oils during ambient storage through HS-SPME/GC–MS. *Int. J. Food Prop.* **20** (suppl. 3), S2926–S2938 (2017). [doi:10.1080/10942912.2017.1382510](https://doi.org/10.1080/10942912.2017.1382510)
32. P. Mukherjee, G. Hough, A. Chattopadhyay, V. Grijalva, E. I. O'Connor, D. Meriwether, A. Wagner, J. M. Ntambi, M. Navab, S. T. Reddy, A. M. Fogelman, Role of enterocyte stearoyl-Co-A desaturase-1 in LDLR-null mice. *J. Lipid Res.* **59**, 1818–1840 (2018). [doi:10.1194/jlr.M083527](https://doi.org/10.1194/jlr.M083527) [Medline](#)
33. J. J. Piotrowski, G. C. Hunter, C. D. Eskelson, M. A. Dubick, V. M. Bernhard, Evidence for lipid peroxidation in atherosclerosis. *Life Sci.* **46**, 715–721 (1990). [doi:10.1016/0024-3205\(90\)90077-5](https://doi.org/10.1016/0024-3205(90)90077-5) [Medline](#)
34. A. Daugherty, A. R. Tall, M. J. A. P. Daemen, E. Falk, E. A. Fisher, G. García-Cardena, A. J. Lusis, A. P. Owens 3rd, M. E. Rosenfeld, R. Virmani; American Heart Association Council on Arteriosclerosis, Thrombosis and Vascular Biology; and Council on Basic Cardiovascular Sciences, Recommendation on design, execution, and reporting of animal atherosclerosis studies: A scientific statement from the American Heart Association. *Arterioscler. Thromb. Vasc. Biol.* **37**, e131–e157 (2017). [doi:10.1161/ATV.0000000000000062](https://doi.org/10.1161/ATV.0000000000000062) [Medline](#)
35. R. Sharma, Y. Ishimaru, I. Davison, K. Ikegami, M.-S. Chien, H. You, Q. Chi, M. Kubota, M. Yohda, M. Ehlers, H. Matsunami, Olfactory receptor accessory proteins play crucial

roles in receptor function and gene choice. *eLife* **6**, e21895 (2017).  
[doi:10.7554/eLife.21895](https://doi.org/10.7554/eLife.21895) [Medline](#)

36. S. Ameli, A. Hultgårdh-Nilsson, J. Regnström, F. Calara, J. Yano, B. Cercek, P. K. Shah, J. Nilsson, Effect of immunization with homologous LDL and oxidized LDL on early atherosclerosis in hypercholesterolemic rabbits. *Arterioscler. Thromb. Vasc. Biol.* **16**, 1074–1079 (1996). [doi:10.1161/01.ATV.16.8.1074](https://doi.org/10.1161/01.ATV.16.8.1074) [Medline](#)
37. H. Winkels, E. Ehinger, M. Vassallo, K. Buscher, H. Q. Dinh, K. Kobiyama, A. A. J. Hamers, C. Cochain, E. Vafadarnejad, A.-E. Saliba, A. Zerneck, A. B. Pramod, A. K. Ghosh, N. Anto Michel, N. Hoppe, I. Hilgendorf, A. Zirlik, C. C. Hedrick, K. Ley, D. Wolf, Atlas of the immune cell repertoire in mouse atherosclerosis defined by single-cell RNA-sequencing and mass cytometry. *Circ. Res.* **122**, 1675–1688 (2018).  
[doi:10.1161/CIRCRESAHA.117.312513](https://doi.org/10.1161/CIRCRESAHA.117.312513) [Medline](#)
